# Supplementary material for: Free-radical cyclization approach to polyheterocycles containing pyrrole and pyridine rings
Source: publisher site journal article supplement (doi:10.3762/bjoc.17.105), 2021-06-23
Supplement: Additional file 1 [file 1860-5397-17-105-S1.pdf]

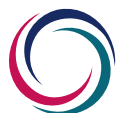

## Supporting Information

for

### **Free-radical cyclization approach to polyheterocycles containing pyrrole and pyridine rings**

Ivan P. Mosiagin, Olesya A. Tomashenko, Dar'ya V. Spiridonova, Mikhail S. Novikov, Sergey P. Tunik and Alexander F. Khlebnikov

*Beilstein J. Org. Chem.* **2021**, *17*, 1490–1498. doi:10.3762/bjoc.17.105

### **Experimental procedures, compound characterization data, X-ray diffraction experiment, and copies of NMR spectra of new compounds**

## **Table of contents**

|                                    |      |
|------------------------------------|------|
| Experimental section .....         | S2   |
| References .....                   | S38  |
| Copies of NMR spectra .....        | S40  |
| X-ray-diffraction experiments..... | S242 |



## Experimental section

### General Information and Methods.

$^1\text{H}$  (400 or 500 MHz) and  $^{13}\text{C}$  (101 or 126 MHz) NMR spectra were recorded on the Bruker AVANCE 400 spectrometer, chemical shift values are reported in ppm on the  $\delta$  scale relative to TMS ( $\delta = 0.00$ ).  $^1\text{H}$  NMR spectra were calibrated according to the residual peak of DMSO- $d_6$  (2.50 ppm). For all new compounds  $^{13}\text{C}\{^1\text{H}\}$  and  $^{13}\text{C}$  DEPT135 were recorded and calibrated according to the peak of DMSO- $d_6$  (39.52 ppm). Mass spectra were recorded on the mass spectrometer Bruker maXis HRMS-ESI-QTOF, electrospray ionization, positive mode. Single-crystal X-ray data were collected by means of the Rigaku Oxford Diffraction «XtaLAB Supernova» with HyPix 3000 type detector. Crystallographic data for the structures **3a** (CCDC 1974298), **13** (CCDC 2049334), and **17a** (CCDC 2049337) have been deposited with the Cambridge Crystallographic Data Centre. Melting points were determined on melting point apparatus Stuart® SMP30. Thin-layer chromatography (TLC) was conducted on aluminum sheets ALUGRAM SIL G/UV254 with 0.2 mm silica gel (fluorescent indicator). 3-(2-Iodophenyl)-2*H*-azirine [1], azirines **4a,c,d** [1] and azirine **4b**[2] were obtained according to the published procedures. Pyridinium salts **5k,l,n-w** were obtained from the corresponding 2-bromoacetophenones and pyridines in acetone or diethyl ether, salt **5m** was obtained from 2-acetylpyridine and  $\text{I}_2$  in pyridine [3]. Salts **1a**, *N*-Me-**1a**, **16a,d** were obtained according to the reported procedure [4].

### Synthesis of starting materials.

#### *Synthesis of 3-(2-iodophenyl)-2H-azirine*

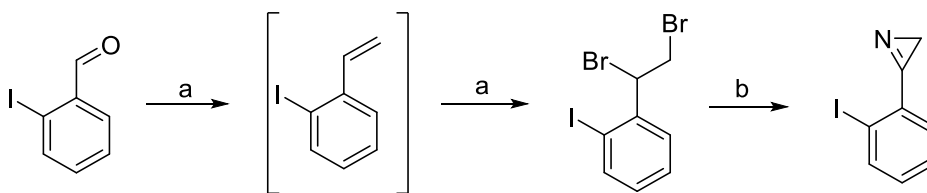

(a) Potassium *tert*-butoxide (3.48 g, 32.0 mmol, 1.75 equiv) was added in one portion to a suspension of methyltriphenylphosphonium bromide (10.4 g, 29.0 mmol, 1.6 equiv) in THF (40 mL). The reaction mixture was stirred for 30 min, cooled to 0 °C, a solution of 2-iodobenzaldehyde (4.25 g, 18.0 mmol) in THF (10 mL) was added from a dropping funnel for 30 min and the reaction mixture was refluxed for 2 h. The completion of the reaction was monitored by TLC analysis. The reaction mixture was cooled, THF was partially evaporated,

dichloromethane was added and the organic layer was washed with saturated aq  $\text{NH}_4\text{Cl}$  and water. The solvents were evaporated and the residue was suspended in petroleum ether, filtrated, the solvent was evaporated and the residue was resolved in DCM (70 mL). The solution was cooled and a cold solution of bromine (3.02 g, 18.9 mmol, 1.05 equiv) in DCM (50 mL) was added dropwise. The reaction mixture was stirred for an additional 30 min at rt, washed with water, 5% aq  $\text{Na}_2\text{S}_2\text{O}_3$  and brine. The organic fraction was dried over  $\text{Na}_2\text{SO}_4$  and the solvent was removed. 1-(1,2-dibromoethyl)-2-iodobenzene was isolated by chromatography on silica gel (petroleum ether). Yield 3.34 g (50%).

White solid, mp 45 °C.  $^1\text{H}$  NMR (400 MHz,  $\text{CDCl}_3$ ):  $\delta$  7.87 (dd,  $J$  = 8.0, 1.1 Hz, 1H), 7.52 (dd,  $J$  = 7.9, 1.5 Hz, 1H), 7.48–7.36 (m, 1H), 7.03 (td,  $J$  = 7.7, 1.6 Hz, 1H), 5.55 (dd,  $J$  = 9.6, 6.5 Hz, 1H), 4.18–3.99 (m, 2H).  $^{13}\text{C}$  NMR (101 MHz,  $\text{CDCl}_3$ ):  $\delta$  140.7 (C), 140.0 (CH), 130.6 (CH), 129.1 (CH), 127.7 (CH), 100.8 (C), 53.8 (CH), 34.0 ( $\text{CH}_2$ ). HRMS (ESI)  $m/z$ : 388.8032 calcd for  $\text{C}_8\text{H}_8\text{Br}_2\text{I}^+ [\text{M} + \text{H}]^+$ , found 388.8036.

**(b)** To a solution of 1-(1,2-dibromoethyl)-2-iodobenzene (2.81 g, 7.21 mmol) in DMSO (200 mL) sodium azide (702 mg, 10.8 mmol) was added in several portions. The reaction mixture was stirred at rt for 24 h, then a solution of NaOH (290 mg, 7.21 mmol, 1 equiv) in water (10 mL) was added and stirring was continued for another 24 h. The reaction mixture was poured in 2% aq  $\text{NaHCO}_3$ , the water layer was extracted with DCM, the combined organic layers were washed with brine, dried over  $\text{Na}_2\text{SO}_4$  and the product was purified by chromatography on  $\text{Al}_2\text{O}_3$  (petroleum ether). The solvent was removed, the residue dissolved in toluene (60 mL) and the solution was refluxed for 3 h. After evaporation of toluene the product was used without further purification.

Yield 826 mg (47 %). Yellowish solid, mp 92–94 °C.  $^1\text{H}$  NMR (400 MHz,  $\text{CDCl}_3$ ):  $\delta$  8.03 (dd,  $J$  = 8.1, 1.2 Hz, 1H), 7.81 (dd,  $J$  = 7.7, 1.7 Hz, 1H), 7.54 (td,  $J$  = 7.6, 1.2 Hz, 1H), 7.27 (td,  $J$  = 7.7, 1.8 Hz, 1H), 1.95 (s, 2H).  $^{13}\text{C}$  NMR (101 MHz,  $\text{CDCl}_3$ ):  $\delta$  168.6 (C), 140.6 (CH), 133.6 (CH), 132.8 (CH), 128.4 (CH), 128.2 (C), 98.2 (C), 22.3 ( $\text{CH}_2$ ). HRMS (ESI)  $m/z$ : 243.9618 calcd for  $\text{C}_8\text{H}_7\text{IN}^+ [\text{M} + \text{H}]^+$ , found 243.9621.

*1-(1-Benzyl-4-(2-bromophenyl)-2-phenyl-1H-pyrrol-3-yl)pyridin-1-ium bromide (N-Bn-1a)*. To a stirred suspension of 4-(2-bromophenyl)-2-phenyl-3-(pyridin-1-ium-1-yl)pyrrol-1-ide [4] (220 mg, 0.59 mmol) and  $\text{K}_2\text{CO}_3$  (162 mg, 1.17 mmol, 2 equiv) in acetonitrile (10 mL) benzyl bromide (281 mg, 2.05 mmol, 3.5 equiv) was added in one portion, and the reaction mixture was vigorously stirred at rt for 12 h. After the reaction was completed acetonitrile was evaporated

and the residue was suspended in diethyl ether. The precipitate was collected, washed with diethyl ether (3×10 mL) and water (3×5 mL) and dried. Yield 180 mg, 56%. Red solid, mp 193–194 °C (MeCN). <sup>1</sup>H NMR (400 MHz, DMSO-*d*<sub>6</sub>): δ 8.86–8.81 (m, 2H), 8.62–8.54 (m, 1H), 8.04 (t, *J* = 7.1 Hz, 2H), 7.62 (d, *J* = 8.0 Hz, 1H), 7.53 (s, 1H), 7.47–7.24 (m, 13H), 7.09–7.02 (m, 2H), 5.28 (s, 2H). <sup>13</sup>C{<sup>1</sup>H} NMR (101 MHz, DMSO-*d*<sub>6</sub>): δ 146.74 (CH), 146.68 (CH), 137.1 (C), 132.8 (CH), 131.6 (CH), 130.3 (CH), 130.1 (CH), 129.5 (CH), 129.1 (CH), 128.9 (C), 128.6 (CH), 128.2 (CH), 128.1 (CH), 127.7 (CH), 126.9 (CH), 126.8 (C), 126.4 (C), 124.4 (C), 123.4 (C), 122.2 (CH), 117.7 (C), 50.8 (CH<sub>2</sub>). HRMS (ESI) *m/z*: 465.0961 calcd for C<sub>28</sub>H<sub>22</sub><sup>79</sup>BrN<sub>2</sub><sup>+</sup> [M – Br]<sup>+</sup>, found 465.0971.

*1-(1-Acetyl-4-(2-bromophenyl)-2-phenyl-1H-pyrrol-3-yl)pyridin-1-ium chloride (N-Ac-1a)*. To a stirred suspension of 4-(2-bromophenyl)-2-phenyl-3-(pyridin-1-ium-1-yl)pyrrol-1-ide [4] (115 mg, 0.307 mmol) and K<sub>2</sub>CO<sub>3</sub> (127 mg, 0.920 mmol, 3 equiv) in dry DCM (6 mL) acetyl chloride (36 mg, 0.46 mmol, 1.5 equiv) was added in one portion, and the reaction mixture was vigorously stirred at rt for 10 min. Then reaction mixture was washed with brine (3×15 mL), dried under Na<sub>2</sub>SO<sub>4</sub> and evaporated to dryness. Yield 130 mg, 94%. Yellow-orange solid, mp 285–286 °C (dec., DCM). <sup>1</sup>H NMR (400 MHz, DMSO-*d*<sub>6</sub>): δ 8.86–8.73 (m, 2H), 8.60 (tt, *J* = 7.9, 1.4 Hz, 1H), 8.11–8.01 (m, 2H), 7.60 (d, *J* = 7.9 Hz, 1H), 7.48–7.35 (m, 8H), 7.28 (ddd, *J* = 8.0, 5.6, 3.6 Hz, 1H), 3.71 (s, 3H). <sup>13</sup>C{<sup>1</sup>H} NMR (101 MHz, DMSO-*d*<sub>6</sub>): δ 146.7 (CH), 146.6 (CH), 132.9 (CH), 132.8 (CH), 131.6 (C), 130.08 (CH), 130.07 (CH), 130.0 (CH), 129.3 (CH), 129.2 (CH), 128.7 (C), 128.2 (CH), 126.9 (C), 123.9 (C), 123.4 (C), 122.7 (CH), 117.2 (C), 35.2 (CH<sub>3</sub>). HRMS (ESI) *m/z*: 417.0597 calcd for C<sub>23</sub>H<sub>18</sub><sup>79</sup>BrN<sub>2</sub>O<sup>+</sup> [M – Cl]<sup>+</sup>, found 417.0602.

**General procedure A for the synthesis of 1-(4-(2-bromophenyl)-2-phenyl-1H-pyrrol-3-yl)pyridin-1-ium bromides 1, 7, 9, 12 and 16.** To a suspension of 2*H*-azirine **4** (1.5 equiv) and pyridinium salt **5** (1 equiv) in DCM triethylamine (1.5 equiv) was added in one portion. The reaction mixture was stirred at room temperature for 24 h (progress was monitored by TLC). The precipitate was filtrated off, washed with small amount of cold DCM and dried. In the case of high solubility of a product in DCM it was isolated by column chromatography on silica gel (DCM/MeOH from 20:1 to 10:1).

**General procedure B for the synthesis of bromides 1 and 16 with strong EWD substituent.**

To a suspension of 2*H*-azirine (1.5 equiv) and pyridinium salt (1 equiv) in acetone fresh NiBr<sub>2</sub>·3H<sub>2</sub>O (0.2 equiv) was added in one portion. The reaction mixture was heated at 40 °C for

6 h (progress was monitored by TLC). The precipitate was filtrated off, washed with acetone and dried.

*1-(4-(2-Bromophenyl)-2-(4-fluorophenyl)-1H-pyrrol-3-yl)pyridin-1-ium bromide (1b).*

Compound **1b** (347 mg, 72%) was obtained from 1-(2-(4-fluorophenyl)-2-oxoethyl)pyridin-1-ium bromide [5] (**5b**) (291 mg, 0.98 mmol, 1 equiv), triethylamine (149 mg, 1.48 mmol, 1.5 equiv) and 3-(2-bromophenyl)-2H-azirine (**4a**) (289 mg, 1.48 mmol, 1.5 equiv) in DCM (4 mL) according to the general procedure A. Colorless solid, mp 340–341 °C (dec., DCM). <sup>1</sup>H NMR (400 MHz, DMSO-*d*<sub>6</sub>): δ 12.52 (s, 1H), 8.91 (d, *J* = 5.9 Hz, 2H), 8.73–8.67 (m, 1H), 8.18–8.13 (m, 2H), 7.59 (d, *J* = 7.9 Hz, 1H), 7.45–7.40 (m, 2H), 7.35–7.21 (m, 6H). <sup>13</sup>C{<sup>1</sup>H} NMR (101 MHz, DMSO-*d*<sub>6</sub>): δ 161.8 (d, *J* = 246.4 Hz, C), 147.0 (CH), 147.0 (CH), 132.8 (d, *J* = 34.2 Hz, CH), 132.0 (C), 130.0 (CH), 129.3 (CH), 129.2 (CH), 128.6 (CH), 128.1 (CH), 125.5 (C), 124.9 (d, *J* = 3.2 Hz, C), 123.7 (C), 122.9 (C), 119.2 (C), 118.8 (CH), 116.3 (d, *J* = 21.8 Hz, CH). HRMS (ESI) *m/z*: 393.0397 calcd for C<sub>21</sub>H<sub>15</sub><sup>79</sup>BrFN<sub>2</sub><sup>+</sup> [M – Br]<sup>+</sup>, found 393.0387.

*1-(4-(2-Bromophenyl)-2-(4-chlorophenyl)-1H-pyrrol-3-yl)pyridin-1-ium bromide (1c).*

Compound **1c** (385 mg, 80%) was obtained from 1-(2-(4-chlorophenyl)-2-oxoethyl)pyridin-1-ium bromide [6] (**5c**) (307 mg, 0.98 mmol, 1 equiv), triethylamine (145 mg, 1.47 mmol, 1.5 equiv) and 3-(2-bromophenyl)-2H-azirine (**4a**) (289 mg, 1.47 mmol, 1.5 equiv) in DCM (4 mL) according to the general procedure A. Yellow solid, mp 330–332 °C (dec., DCM). <sup>1</sup>H NMR (400 MHz, DMSO-*d*<sub>6</sub>): δ 12.56 (s, 1H), 8.92 (d, *J* = 5.5 Hz, 2H), 8.70 (t, *J* = 7.8 Hz, 1H), 8.21–8.11 (m, 2H), 7.60 (d, *J* = 7.9 Hz, 1H), 7.52–7.38 (m, 4H), 7.35 (s, 1H), 7.32–7.21 (m, 3H). <sup>13</sup>C{<sup>1</sup>H} NMR (101 MHz, DMSO-*d*<sub>6</sub>): δ 147.0 (CH), 147.0 (CH), 133.0 (CH), 132.6 (CH), 131.9 (C), 130.1 (CH), 129.3 (CH), 128.7 (CH), 128.6 (CH), 128.1 (CH), 127.2 (C), 125.1 (C), 123.7 (C), 123.2 (C), 119.4 (C), 119.3 (CH). HRMS (ESI) *m/z*: 409.0107 calcd for C<sub>21</sub>H<sub>15</sub><sup>79</sup>BrClN<sub>2</sub><sup>+</sup> [M – Br]<sup>+</sup>, found 409.0114.

*1-(4-(2-Bromophenyl)-2-(4-bromophenyl)-1H-pyrrol-3-yl)pyridin-1-ium bromide (1d).*

Compound **1d** (383 mg, 79%) was obtained from 1-(2-(4-bromophenyl)-2-oxoethyl)pyridin-1-ium bromide [6] (**5d**) (323 mg, 0.90 mmol, 1 equiv), triethylamine (137 mg, 1.36 mmol, 1.5 equiv) and 3-(2-bromophenyl)-2H-azirine (**4a**) (266 mg, 1.36 mmol, 1.5 equiv) in DCM (4 mL) according to the general procedure A. Slightly-yellow solid, mp 338–339 °C (dec., DCM). <sup>1</sup>H NMR (400 MHz, DMSO-*d*<sub>6</sub>): δ 12.57 (s, 1H), 8.91 (d, *J* = 5.7 Hz, 2H), 8.70 (t, *J* = 7.8 Hz, 1H), 8.16 (t, *J* = 7.1 Hz, 2H), 7.62–7.58 (m, 3H), 7.45–7.38 (m, 2H), 7.35 (s, 1H), 7.28 (ddd, *J* = 8.8, 5.9, 3.4 Hz, 1H), 7.17 (d, *J* = 8.5 Hz, 2H). <sup>13</sup>C{<sup>1</sup>H} NMR (101 MHz, DMSO-*d*<sub>6</sub>): δ 147.0 (CH), 146.97 (CH), 133.0 (CH), 132.6 (CH), 132.2 (CH), 131.9 (C), 130.1 (CH), 128.8 (CH), 128.7

(CH), 128.1 (CH), 127.6 (C), 125.2 (C), 123.7 (C), 123.2 (C), 121.6 (C), 119.5 (C), 119.3 (CH). HRMS (ESI)  $m/z$ : 454.9577 calcd for  $C_{21}H_{16}^{79}Br^{81}BrN_2^+$   $[M - Br]^+$ , found 454.9591.

*1-(4-(2-Bromophenyl)-2-(p-tolyl)-1H-pyrrol-3-yl)pyridin-1-ium bromide (1e)*. Compound **1e** (381 mg, 76%) was obtained from 1-(2-oxo-2-(4-methylphenyl)ethyl)pyridin-1-ium bromide [6] (**5e**) (310 mg, 1.06 mmol, 1 equiv), triethylamine (160 mg, 1.59 mmol, 1.5 equiv) and 3-(2-bromophenyl)-2H-azirine (**4a**) (311 mg, 1.59 mmol, 1.5 equiv) in DCM (4 mL) according to the general procedure A. Slightly-yellow solid, mp 330–331 °C (dec., DCM).  $^1H$  NMR (400 MHz, DMSO- $d_6$ ):  $\delta$  12.42 (s, 1H), 8.91 (d,  $J$  = 5.5 Hz, 2H), 8.69 (t,  $J$  = 7.9 Hz, 1H), 8.20–8.11 (m, 2H), 7.59 (d,  $J$  = 7.8 Hz, 1H), 7.45–7.39 (m, 2H), 7.30–7.24 (m, 2H), 7.20 (d,  $J$  = 8.0 Hz, 2H), 7.10 (d,  $J$  = 8.2 Hz, 2H), 2.30 (s, 3H).  $^{13}C\{^1H\}$  NMR (101 MHz, DMSO- $d_6$ ):  $\delta$  147.1 (C), 146.9 (CH), 137.9 (C), 133.0 (CH), 132.6 (CH), 132.1 (C), 130.0 (CH), 129.8 (CH), 128.6 (CH), 128.1 (CH), 126.7 (CH), 126.5 (C), 125.5 (C), 123.7 (C), 122.7 (C), 119.2 (C), 118.6 (CH), 20.7 (CH<sub>3</sub>). HRMS (ESI)  $m/z$ : 389.0648 calcd for  $C_{22}H_{18}^{79}BrN_2^+$   $[M - Br]^+$ , found 389.0652.

*1-(4-(2-Bromophenyl)-2-(4-methoxyphenyl)-1H-pyrrol-3-yl)pyridin-1-ium bromide (1f)*. Compound **1f** (400 mg, 83%) was obtained from 1-(2-(4-methoxyphenyl)-2-oxoethyl)pyridin-1-ium bromide [6] (**5f**) (305 mg, 0.99 mmol, 1 equiv), triethylamine (151 mg, 1.50 mmol, 1.5 equiv) and 3-(2-bromophenyl)-2H-azirine (**4a**) (292 mg, 1.49 mmol, 1.5 equiv) in DCM (4 mL) according to the general procedure A. Slightly-yellow solid, mp 294 °C (dec., DCM).  $^1H$  NMR (400 MHz, DMSO- $d_6$ ):  $\delta$  12.35 (s, 1H), 8.90 (d,  $J$  = 5.8 Hz, 2H), 8.69 (t,  $J$  = 7.7 Hz, 1H), 8.19–8.07 (m, 2H), 7.59 (d,  $J$  = 7.8 Hz, 1H), 7.46–7.37 (m, 2H), 7.31–7.25 (m, 2H), 7.16 (d,  $J$  = 8.7 Hz, 2H), 6.96 (d,  $J$  = 8.8 Hz, 2H), 3.76 (s, 3H).  $^{13}C\{^1H\}$  NMR (101 MHz, DMSO- $d_6$ ):  $\delta$  159.2 (C), 147.1 (CH), 146.8 (CH), 133.0 (CH), 132.6 (CH), 132.2 (C), 129.9 (CH), 128.5 (CH), 128.4 (CH), 128.1 (CH), 126.4 (C), 123.7 (C), 122.4 (C), 120.6 (C), 119.0 (C), 118.2 (CH), 114.7 (CH), 55.2 (CH<sub>3</sub>). HRMS (ESI)  $m/z$ : 405.0597 calcd for  $C_{22}H_{18}^{79}BrN_2O^+$   $[M - Br]^+$ , found 405.0593.

*1-(4-(2-Bromophenyl)-2-(2-methoxyphenyl)-1H-pyrrol-3-yl)pyridin-1-ium bromide (1g)*. Compound **1g** (306 mg, 63%) was obtained from 1-(2-(2-methoxyphenyl)-2-oxoethyl)pyridin-1-ium bromide [6] (**5g**) (305 mg, 0.99 mmol, 1 equiv), triethylamine (151 mg, 1.45 mmol, 1.5 equiv) and 3-(2-bromophenyl)-2H-azirine (**4a**) (292 mg, 1.49 mmol, 1.5 equiv) in DCM (4 mL) according to the general procedure A. Yellow solid, mp 264 °C (dec., DCM).  $^1H$  NMR (400 MHz, DMSO- $d_6$ ):  $\delta$  12.30 (br. s, 1H), 8.71 (d,  $J$  = 5.7 Hz, 2H), 8.63 (t,  $J$  = 7.8 Hz, 1H), 8.08 (t,  $J$  = 7.0 Hz, 2H), 7.60 (d,  $J$  = 7.9 Hz, 1H), 7.54 (d,  $J$  = 7.4 Hz, 1H), 7.51–7.37 (m, 3H), 7.35–7.24 (m, 2H), 7.15–7.09 (m, 1H), 6.96 (d,  $J$  = 8.3 Hz, 1H), 3.24 (s, 3H).  $^{13}C\{^1H\}$  NMR (101 MHz,

DMSO-*d*<sub>6</sub>):  $\delta$  155.1 (C), 146.1 (CH), 146.0 (CH), 133.1 (CH), 132.7 (CH), 132.2 (C), 130.6 (CH), 130.5 (CH), 129.9 (CH), 128.2 (CH), 128.1 (CH), 124.0 (C), 123.6 (C), 123.5 (C), 121.1 (CH), 119.1 (CH), 118.2 (C), 116.8 (C), 111.4 (CH), 54.8 (CH<sub>3</sub>). HRMS (ESI) *m/z*: 405.0597 calcd for C<sub>22</sub>H<sub>18</sub><sup>79</sup>BrN<sub>2</sub>O<sup>+</sup> [M – Br]<sup>+</sup>, found 405.0611.

*1-(4-(2-Bromophenyl)-2-(3-methoxyphenyl)-1H-pyrrol-3-yl)pyridin-1-ium bromide (1h)*. Compound **1h** (235 mg, 68%) was obtained from 1-(2-(3-methoxyphenyl)-2-oxoethyl)pyridin-1-ium bromide [6] (**5h**) (215 mg, 0.99 mmol, 1 equiv), triethylamine (150 mg, 1.49 mmol, 1.5 equiv) and 3-(2-bromophenyl)-2*H*-azirine (**4a**) (205 mg, 1.49 mmol, 1.5 equiv) in DCM (4 mL) according to the general procedure A. Yellow solid, mp 283–285 °C (dec., DCM). <sup>1</sup>H NMR (400 MHz, DMSO-*d*<sub>6</sub>):  $\delta$  12.49 (s, 1H), 8.94 (d, *J* = 5.5 Hz, 2H), 8.70 (t, *J* = 7.8 Hz, 1H), 8.25–8.04 (m, 2H), 7.60 (d, *J* = 7.9 Hz, 1H), 7.46–7.38 (m, 2H), 7.33 (s, 1H), 7.32–7.25 (m, 2H), 6.93 (dd, *J* = 8.2, 2.3 Hz, 1H), 6.85–6.82 (m, 1H), 6.67 (d, *J* = 7.8 Hz, 1H), 3.70 (s, 3H). <sup>13</sup>C{<sup>1</sup>H} NMR (101 MHz, DMSO-*d*<sub>6</sub>):  $\delta$  159.7 (C), 147.2 (CH), 147.0 (CH), 133.0 (CH), 132.6 (CH), 132.0 (C), 130.4 (CH), 130.0 (CH), 129.6 (C), 128.5 (CH), 128.1 (CH), 126.1 (C), 123.7 (C), 123.1 (C), 119.3 (C), 118.9 (CH), 118.7 (CH), 114.0 (CH), 112.2 (CH), 55.1 (CH<sub>3</sub>). HRMS (ESI) *m/z*: 405.0597 calcd for C<sub>22</sub>H<sub>18</sub><sup>79</sup>BrN<sub>2</sub>O<sup>+</sup> [M – Br]<sup>+</sup>, found 405.0601.

*1-(4-(2-Bromophenyl)-2-(2,4-dimethoxyphenyl)-1H-pyrrol-3-yl)pyridin-1-ium bromide (1i)*. Compound **1i** (279 mg, 56%) was obtained from 1-(2-(2,4-dimethoxyphenyl)-2-oxoethyl)pyridin-1-ium bromide (**5i**) (327 mg, 0.97 mmol, 1 equiv), triethylamine (147 mg, 1.45 mmol, 1.5 equiv) and 3-(2-bromophenyl)-2*H*-azirine (**4a**) (283 mg, 1.45 mmol, 1.5 equiv) in DCM (4 mL) according to the general procedure A. Bright-yellow solid, mp 250–251 °C (dec., DCM). <sup>1</sup>H NMR (400 MHz, DMSO-*d*<sub>6</sub>):  $\delta$  12.16 (br. s, 1H), 8.67 (d, *J* = 5.5 Hz, 2H), 8.62 (t, *J* = 7.8 Hz, 1H), 8.07 (t, *J* = 7.8 Hz, 2H), 7.59 (d, *J* = 7.9 Hz, 1H), 7.54–7.37 (m, 3H), 6.71 (dd, *J* = 8.5, 2.4 Hz, 1H), 6.49 (d, *J* = 2.4 Hz, 1H), 3.79 (s, 3H), 3.24 (s, 3H). <sup>13</sup>C{<sup>1</sup>H} NMR (101 MHz, DMSO-*d*<sub>6</sub>):  $\delta$  161.3 (C), 156.4 (C), 146.1 (CH), 145.8 (CH), 133.1 (CH), 132.7 (CH), 132.3 (C), 131.4 (CH), 129.8 (CH), 128.2 (CH), 128.0 (CH), 123.6 (C), 123.46 (C), 118.5 (CH), 118.0 (C), 109.3 (C), 106.1 (CH), 98.4 (CH), 55.4 (CH<sub>3</sub>), 54.9 (CH<sub>3</sub>). HRMS (ESI) *m/z*: 435.0703 calcd for C<sub>23</sub>H<sub>20</sub><sup>79</sup>BrN<sub>2</sub>O<sub>2</sub><sup>+</sup> [M – Br]<sup>+</sup>, found 435.0693.

*1-(4-(2-Bromophenyl)-2-(4-nitrophenyl)-1H-pyrrol-3-yl)pyridin-1-ium bromide (1j)*. Compound **1j** (350 mg, 72%) was obtained from 1-(2-(4-nitrophenyl)-2-oxoethyl)pyridin-1-ium bromide [6] (**5j**) (311 mg, 0.96 mmol, 1 equiv), triethylamine (146 mg, 1.45 mmol, 1.5 equiv) and 3-(2-bromophenyl)-2*H*-azirine (**4a**) (284 mg, 1.45 mmol, 1.5 equiv) in DCM (4 mL) according to the general procedure A. Orange-yellow solid, mp > 400 °C (DCM). <sup>1</sup>H NMR (400 MHz, DMSO-

$d_6$ ):  $\delta$  12.86 (s, 1H), 8.99 (d,  $J$  = 5.5 Hz, 2H), 8.75 (t,  $J$  = 7.9 Hz, 1H), 8.28–8.14 (m, 4H), 7.61 (d,  $J$  = 7.8 Hz, 1H), 7.51–7.39 (m, 5H), 7.35–7.23 (m, 1H).  $^{13}\text{C}\{^1\text{H}\}$  NMR (101 MHz, DMSO- $d_6$ ):  $\delta$  147.4 (C), 147.0 (CH), 146.4 (C), 134.8 (C), 133.0 (CH), 132.7 (CH), 131.5 (C), 130.2 (CH), 128.8 (CH), 128.1 (CH), 127.5 (CH), 124.5 (CH), 124.0 (C), 123.7 (C), 120.8 (CH), 120.3 (C). HRMS (ESI)  $m/z$ : 420.0342 calcd for  $\text{C}_{21}\text{H}_{15}^{79}\text{BrN}_3\text{O}_2^+$  [ $\text{M} - \text{Br}$ ] $^+$ , found 420.0349.

*1-(4-(2-Bromophenyl)-2-(3-nitrophenyl)-1H-pyrrol-3-yl)pyridin-1-ium bromide (1k).*

Compound **1k** (315 mg, 65%) was obtained from 1-(2-(3-nitrophenyl)-2-oxoethyl)pyridin-1-ium bromide [7] (**5k**) (311 mg, 0.96 mmol, 1 equiv), triethylamine (146 mg, 1.45 mmol, 1.5 equiv) and 3-(2-bromophenyl)-2H-azirine (**4a**) (283 mg, 1.45 mmol, 1.5 equiv) in DCM (4 mL) according to the general procedure A. Colorless solid, mp 319–320 °C (dec., DCM).  $^1\text{H}$  NMR (400 MHz, DMSO- $d_6$ ):  $\delta$  12.80 (s, 1H), 8.98 (d,  $J$  = 5.6 Hz, 2H), 8.73 (t,  $J$  = 7.8 Hz, 1H), 8.18 (t,  $J$  = 7.1 Hz, 3H), 8.10 (s, 1H), 7.71–7.54 (m, 3H), 7.48–7.39 (m, 3H), 7.35–7.26 (m, 1H).  $^{13}\text{C}\{^1\text{H}\}$  NMR (101 MHz, DMSO- $d_6$ ):  $\delta$  148.2 (CH), 147.3 (C), 147.0 (CH), 133.0 (CH), 132.9 (CH), 132.7 (CH), 130.9 (CH), 130.2 (CH), 130.0 (C), 128.8 (CH), 128.2 (CH), 124.0 (C), 123.9 (C), 123.7 (C), 122.7 (CH), 121.4 (CH), 120.0 (CH). HRMS (ESI)  $m/z$ : 420.0342 calcd for  $\text{C}_{21}\text{H}_{15}^{79}\text{BrN}_3\text{O}_2^+$  [ $\text{M} - \text{Br}$ ] $^+$ , found 420.0352.

*1-(4-(2-Bromophenyl)-2-(4-cyanophenyl)-1H-pyrrol-3-yl)pyridin-1-ium bromide (1l).*

Compound **1l** (252 mg, 50%) was obtained from 1-(2-(4-cyanophenyl)-2-oxoethyl)pyridin-1-ium bromide [6] (**5l**) (315 mg, 1.04 mmol, 1 equiv), triethylamine (136 mg, 1.56 mmol, 1.5 equiv) and 3-(2-bromophenyl)-2H-azirine (**4a**) (264 mg, 1.56 mmol, 1.5 equiv) in DCM (10 mL) according to the general procedure A. Beige solid, mp 332–333 °C (dec., DCM).  $^1\text{H}$  NMR (400 MHz, DMSO- $d_6$ ):  $\delta$  12.76 (br. s, 1H), 9.00–8.91 (m, 2H), 8.73 (td,  $J$  = 7.9, 1.6 Hz, 1H), 8.22–8.13 (m, 2H), 7.90–7.81 (m, 2H), 7.60 (dd,  $J$  = 8.3, 3.5 Hz, 1H), 7.49–7.34 (m, 5H), 7.33–7.23 (m, 1H).  $^{13}\text{C}\{^1\text{H}\}$  NMR (101 MHz, DMSO- $d_6$ ):  $\delta$  147.4 (CH), 147.0 (CH), 133.1 (CH), 133.0 (CH), 132.9 (C), 132.7 (CH), 131.6 (C), 130.2 (CH), 128.8 (CH), 128.1 (CH), 127.2 (CH), 124.4 (C), 124.1 (C), 123.7 (C), 120.4 (CH), 120.1 (C), 118.4 (C), 110.3 (C). HRMS (ESI)  $m/z$ : 400.0444 calcd for  $\text{C}_{22}\text{H}_{25}^{79}\text{BrN}_3^+$  [ $\text{M} - \text{Br}$ ] $^+$ , found 400.0432.

*1-(4-(2-Bromophenyl)-2-(pyridin-2-yl)-1H-pyrrol-3-yl)pyridin-1-ium iodide (1m).*

Compound **1m** (503 mg, 89%) was obtained from 1-(2-oxo-2-(pyridin-2-yl)ethyl)pyridin-1-ium iodide [3] (**5m**) (411 mg, 1.26 mmol, 1 equiv), triethylamine (190 mg, 1.90 mmol, 1.5 equiv) and 3-(2-bromophenyl)-2H-azirine (**4a**) (372 mg, 1.90 mmol, 1.5 equiv) in DCM (6 mL) according to the general procedure A. Slightly-yellow solid, mp 287–288 °C (DCM).  $^1\text{H}$  NMR (400 MHz, DMSO- $d_6$ ):  $\delta$  12.74 (s, 1H), 9.12–9.03 (m, 2H), 8.72–8.67 (m, 1H), 8.22–8.20 (m, 1H), 8.17–

8.09 (m, 2H), 7.90 (td,  $J = 7.8, 1.9$  Hz, 1H), 7.77–7.73 (m, 1H), 7.60 (dd,  $J = 8.0, 1.2$  Hz, 1H), 7.48–7.36 (m, 3H), 7.31–7.21 (m, 2H).  $^{13}\text{C}\{^1\text{H}\}$  NMR (101 MHz, DMSO- $d_6$ ):  $\delta$  149.2 (CH), 148.1 (C), 147.7 (CH), 146.9 (CH), 137.6 (CH), 132.9 (CH), 132.6 (CH), 131.7 (C), 130.1 (CH), 127.9 (CH), 127.5 (CH), 124.6 (C), 123.8 (C), 122.6 (CH), 120.4 (C), 119.8 (CH), 119.4 (CH). HRMS (ESI)  $m/z$ : 376.0449 calcd for  $\text{C}_{20}\text{H}_{15}^{79}\text{BrN}_3^+$   $[\text{M} - \text{Br}]^+$ , found 376.0445.

*1-(4-(2-Bromophenyl)-2-phenyl-1H-pyrrol-3-yl)-4-methylpyridin-1-ium bromide (1n).* Compound **1n** (397 mg, 82%) was obtained from 4-methyl-1-(2-oxo-2-phenylethyl)pyridin-1-ium bromide [8] (**5n**) (300 mg, 1.03 mmol, 1 equiv), triethylamine (155 mg, 1.52 mmol, 1.5 equiv) and 3-(2-bromophenyl)-2H-azirine (**4a**) (302 mg, 1.54 mmol, 1.5 equiv) in DCM (4 mL) according to the general procedure A. Grey solid, mp 256–257 °C (dec., DCM).  $^1\text{H}$  NMR (400 MHz, DMSO- $d_6$ ):  $\delta$  12.44 (s, 1H), 8.78 (d,  $J = 6.7$  Hz, 2H), 7.97 (d,  $J = 6.4$  Hz, 2H), 7.60 (d,  $J = 7.8$  Hz, 1H), 7.45–7.24 (m, 7H), 7.23–7.18 (m, 2H), 2.63 (s, 3H).  $^{13}\text{C}\{^1\text{H}\}$  NMR (101 MHz, DMSO- $d_6$ ):  $\delta$  160.8 (C), 146.0 (CH), 132.9 (CH), 132.6 (CH), 132.2 (C), 130.0 (CH), 129.3 (CH), 128.8 (CH), 128.5 (C), 128.2 (CH), 128.0 (CH), 126.6 (CH), 126.2 (C), 123.8 (C), 122.6 (C), 119.4 (C), 118.7 (CH), 21.7 (CH<sub>3</sub>). HRMS (ESI)  $m/z$ : 389.0648 calcd for  $\text{C}_{22}\text{H}_{18}^{79}\text{BrN}_2^+$   $[\text{M} - \text{Br}]^+$ , found 389.0654.

*1-(4-(2-Bromophenyl)-2-phenyl-1H-pyrrol-3-yl)-4-methoxypyridin-1-ium bromide (1o).* Compound **1o** (277 mg, 55%) was obtained from 4-methoxy-1-(2-oxo-2-phenylethyl)pyridin-1-ium bromide [8] (**5o**) (317 mg, 1.03 mmol, 1 equiv), triethylamine (155 mg, 1.54 mmol, 1.5 equiv) and 3-(2-bromophenyl)-2H-azirine (**4a**) (302 mg, 1.54 mmol, 1.5 equiv) in DCM (5 mL) according to the general procedure A. Yellow solid, mp 328–330 °C (dec., DCM).  $^1\text{H}$  NMR (400 MHz, DMSO- $d_6$ ):  $\delta$  12.32 (br. s, 1H), 8.73 (d,  $J = 7.0$  Hz, 2H), 7.67–7.66 (m, 3H), 7.45–7.32 (m, 5H), 7.30–7.25 (m, 2H), 7.24–7.17 (m, 2H), 4.11 (s, 3H).  $^{13}\text{C}\{^1\text{H}\}$  NMR (101 MHz, DMSO- $d_6$ ):  $\delta$  171.41 (C), 148.38 (CH), 132.9 (CH), 132.6 (CH), 132.4 (C), 129.9 (CH), 129.3 (CH), 128.7 (C), 128.04 (CH), 127.95 (CH), 126.4 (CH), 126.1 (C), 123.9 (C), 122.2 (C), 119.6 (C), 118.5 (CH), 113.9 (CH), 58.4 (CH<sub>3</sub>). HRMS (ESI)  $m/z$ : 405.0597 calcd for  $\text{C}_{22}\text{H}_{18}^{79}\text{BrN}_2\text{O}^+$   $[\text{M} - \text{Br}]^+$ , found 405.0617.

*1-(4-(2-Bromophenyl)-2-phenyl-1H-pyrrol-3-yl)-4-(dimethylamino)pyridin-1-ium bromide (1p).* Compound **1p** (1.109 g, 51%) was obtained from 4-(dimethylamino)-1-(2-oxo-2-phenylethyl)pyridin-1-ium bromide [6] (**5p**) (680 mg, 2.12 mmol, 1 equiv), triethylamine (320 mg, 3.18 mmol, 1.5 equiv) and 3-(2-bromophenyl)-2H-azirine (**4a**) (624 mg, 3.18 mmol, 1.5 equiv) in DCM (10 mL) according to the general procedure A. Colorless solid, mp 313 °C (DCM).  $^1\text{H}$  NMR (400 MHz, DMSO- $d_6$ ):  $\delta$  12.16 (s, 1H), 8.08 (d,  $J = 7.6$  Hz, 2H), 7.64 (d,  $J =$



8.0 Hz, 1H), 7.44–7.19 (m, 8H), 7.18 (s, 1H), 6.97 (d,  $J = 7.6$  Hz, 2H), 3.18 (s, 6H).  $^{13}\text{C}\{^1\text{H}\}$  NMR (101 MHz, DMSO- $d_6$ ):  $\delta$  155.6 (C), 144.0 (CH), 133.1 (C), 132.7 (CH), 132.6 (CH), 129.7 (CH), 129.3 (C), 129.1 (CH), 127.8 (CH), 127.7 (CH), 126.1 (CH), 125.7 (C), 124.0 (C), 122.3 (C), 119.9 (C), 118.1 (CH), 107.8 (CH), 39.9 (CH<sub>3</sub>). HRMS (ESI)  $m/z$ : вычислено 418.0913,  $\text{C}_{23}\text{H}_{21}^{79}\text{BrN}_3^+ [\text{M} - \text{Br}]^+$ , найдено 418.0907.

*1-(4-(2-Bromophenyl)-2-phenyl-1H-pyrrol-3-yl)-4-phenylpyridin-1-ium bromide (1q).* Compound **1q** (480 mg, 80%) was obtained from 1-1-(2-oxo-2-phenylethyl)-4-phenylpyridin-1-ium bromide [8] (**5q**) (400 mg, 1.13 mmol, 1 equiv), triethylamine (172 mg, 1.70 mmol, 1.5 equiv) and 3-(2-bromophenyl)-2H-azirine (**4a**) (332 mg, 1.70 mmol, 1.5 equiv) in DCM (10 mL) according to the general procedure A. Orange solid, mp 335 °C (dec., DCM).  $^1\text{H}$  NMR (400 MHz, DMSO- $d_6$ ):  $\delta$  12.50 (s, 1H), 8.92 (d,  $J = 7.0$  Hz, 2H), 8.53 (d,  $J = 7.0$  Hz, 2H), 8.13 (d,  $J = 7.2$  Hz, 2H), 7.71–7.55 (m, 4H), 7.50–7.24 (m, 9H).  $^{13}\text{C}\{^1\text{H}\}$  NMR (101 MHz, DMSO- $d_6$ ):  $\delta$  155.3 (C), 146.9 (CH), 133.0 (C), 132.8 (CH), 132.72 (C), 132.70 (CH), 132.2 (C), 130.0 (CH), 129.7 (CH), 129.3 (CH), 128.52 (C), 128.41 (CH), 128.2 (CH), 128.1 (CH), 126.8 (CH), 126.4 (C), 124.5 (CH), 123.8 (C), 119.4 (C), 119.0 (CH). HRMS (ESI)  $m/z$ : 451.0804 calcd for  $\text{C}_{27}\text{H}_{20}^{79}\text{BrN}_2^+ [\text{M} - \text{Br}]^+$ , found 451.0817.

*1-(4-(2-Bromophenyl)-2-phenyl-1H-pyrrol-3-yl)-4-(4-methoxyphenyl)pyridin-1-ium bromide (1r).* Compound **1r** (306 mg, 61%) was obtained from 4-(4-methoxyphenyl)-1-(2-oxo-2-phenylethyl)pyridin-1-ium bromide (**5r**) (342 mg, 0.89 mmol, 1 equiv), triethylamine (135 mg, 1.34 mmol, 1.5 equiv) and 3-(2-bromophenyl)-2H-azirine (**4a**) (261 mg, 1.34 mmol, 1.5 equiv) in DCM (10 mL) according to the general procedure A. Yellow solid, mp 192–193 °C (DCM).  $^1\text{H}$  NMR (400 MHz, DMSO- $d_6$ ):  $\delta$  12.42 (br. s, 1H), 8.86–8.70 (m, 2H), 8.51–8.38 (m, 2H), 8.20–8.08 (m, 2H), 7.62 (dd,  $J = 8.1, 1.2$  Hz, 1H), 7.50–7.24 (m, 9H), 7.21–7.13 (m, 2H), 3.88 (s, 3H).  $^{13}\text{C}\{^1\text{H}\}$  NMR (101 MHz, DMSO- $d_6$ ):  $\delta$  163.3 (C), 154.6 (C), 146.4 (CH), 132.9 (CH), 132.7 (CH), 132.3 (C), 130.5 (CH), 130.0 (CH), 129.3 (CH), 128.6 (C), 128.2 (CH), 128.0 (C), 126.7 (CH), 126.3 (C), 124.6 (C), 123.8 (C), 123.0 (CH), 122.5 (C), 119.4 (C), 118.8 (CH), 115.3 (CH), 55.8 (CH<sub>3</sub>). HRMS (ESI)  $m/z$ : 481.0910 calcd for  $\text{C}_{28}\text{H}_{22}^{79}\text{BrN}_2\text{O}^+ [\text{M} - \text{Br}]^+$ , found 481.0898.

*1-(4-(2-Bromophenyl)-2-phenyl-1H-pyrrol-3-yl)-3,5-dimethylpyridin-1-ium bromide (1s).* Compound **1s** (367 mg, 73%) was obtained from 3,5-dimethyl-1-(2-oxo-2-phenylethyl)pyridin-1-ium bromide [9] (**5s**) (316 mg, 1.03 mmol, 1 equiv), triethylamine (156 mg, 1.55 mmol, 1.5 equiv) and 3-(2-bromophenyl)-2H-azirine (**4a**) (304 mg, 1.55 mmol, 1.5 equiv) in DCM (6 mL) according to the general procedure A. Bright yellow solid, mp 317–318 °C (DCM).  $^1\text{H}$  NMR

(400 MHz, DMSO-*d*<sub>6</sub>):  $\delta$  12.44 (br. s, 1H), 8.74 (s, 2H), 8.42 (s, 1H), 7.60 (d, *J* = 7.9 Hz, 1H), 7.45–7.32 (m, 5H), 7.32–7.23 (m, 2H), 7.20 (d, *J* = 6.9 Hz, 2H), 2.34 (s, 6H). <sup>13</sup>C{<sup>1</sup>H} NMR (101 MHz, DMSO-*d*<sub>6</sub>):  $\delta$  147.9 (CH), 143.9 (CH), 138.4 (C), 132.8 (CH), 132.6 (C), 132.1 (C), 129.9 (CH), 129.2 (CH), 128.5 (C), 128.2 (CH), 127.9 (CH), 126.3 (CH), 126.0 (C), 123.8 (C), 122.9 (C), 119.6 (C), 118.7 (CH), 17.4 (CH<sub>3</sub>). HRMS (ESI) *m/z*: 403.0804 calcd for C<sub>23</sub>H<sub>20</sub><sup>79</sup>BrN<sub>2</sub><sup>+</sup> [M – Br]<sup>+</sup>, found 403.0818.

*2-(4-(2-Bromophenyl)-2-phenyl-1H-pyrrol-3-yl)isoquinolin-2-iumbromide (1t)*. Compound **1t** (240 mg, 40%) was obtained from 2-(2-oxo-2-phenylethyl)isoquinolin-2-ium bromide [8] (**5t**) (389 mg, 1.19 mmol, 1 equiv), triethylamine (180 mg, 1.78 mmol, 1.5 equiv) and 3-(2-bromophenyl)-2*H*-azirine (**4a**) (349 mg, 1.78 mmol, 1.5 equiv) in DCM (6 mL) according to the general procedure A. Orange solid, mp 266–268 °C (DCM). <sup>1</sup>H NMR (400 MHz, DMSO-*d*<sub>6</sub>):  $\delta$  12.48 (d, *J* = 3.4 Hz, 1H), 10.02 (d, *J* = 1.4 Hz, 1H), 8.63–8.53 (m, 2H), 8.40–8.35 (m, 2H), 8.35–8.25 (m, 1H), 8.07–8.05 (m, 1H), 7.55–7.47 (m, 2H), 7.42–7.30 (m, 5H), 7.26–7.18 (m, 3H). <sup>13</sup>C{<sup>1</sup>H} NMR (101 MHz, DMSO-*d*<sub>6</sub>):  $\delta$  152.0 (CH), 138.1 (CH), 137.2 (CH), 137.0 (C), 133.0 (CH), 132.6 (CH), 132.1 (C), 131.7 (CH), 130.7 (CH), 130.0 (CH), 129.3 (CH), 128.5 (C), 128.3 (CH), 128.1 (CH), 127.5 (CH), 127.3 (C), 126.7 (CH), 126.5 (C), 126.2 (CH), 123.6 (C), 123.1 (C), 119.7 (C), 119.0 (CH). HRMS (ESI) *m/z*: 425.0648 calcd for C<sub>25</sub>H<sub>18</sub><sup>79</sup>BrN<sub>2</sub><sup>+</sup> [M – Br]<sup>+</sup>, found 425.0660.

*1-(4-(2-Bromophenyl)-2-phenyl-1H-pyrrol-3-yl)-4-(methoxycarbonyl)pyridin-1-ium bromide (1u)*. Compound **1u** (246 mg, 52%) was obtained from 4-(methoxycarbonyl)-1-(2-oxo-2-phenylethyl)pyridin-1-ium bromide (**5u**) (309 mg, 0.920 mmol, 1 equiv), triethylamine (147 mg, 1.46 mmol, 1.5 equiv) and 3-(2-bromophenyl)-2*H*-azirine (**4a**) (286 mg, 1.46 mmol, 1.5 equiv) in DCM (4 mL) according to the general procedure A. Red solid, mp 290–291 °C (dec., DCM). <sup>1</sup>H NMR (400 MHz, DMSO-*d*<sub>6</sub>):  $\delta$  12.52 (s, 1H), 9.06–8.97 (m, 2H), 8.47–8.39 (m, 2H), 7.60 (d, *J* = 8.1 Hz, 1H), 7.47–7.33 (m, 6H), 7.31–7.23 (m, 3H), 3.95 (s, 3H). <sup>13</sup>C{<sup>1</sup>H} NMR (101 MHz, DMSO-*d*<sub>6</sub>):  $\delta$  162.2 (C), 148.1 (CH), 144.5 (C), 133.1 (CH), 132.7 (CH), 131.7 (C), 130.1 (CH), 129.4 (CH), 128.5 (CH), 128.3 (CH), 128.0 (C), 127.6 (CH), 127.0 (CH), 126.7 (C), 123.6 (C), 122.7 (C), 119.43 (CH), 119.17 (C), 53.80 (CH<sub>3</sub>). HRMS (ESI) *m/z*: 433.0546 calcd for C<sub>23</sub>H<sub>18</sub><sup>79</sup>BrN<sub>2</sub>O<sub>2</sub><sup>+</sup> [M – Br]<sup>+</sup>, found 433.0564.

*1-(4-(2-Bromophenyl)-2-phenyl-1H-pyrrol-3-yl)-4-cyanopyridin-1-ium bromide (1v)*. Compound **1v** (152 mg, 64%) was obtained from 4-cyano-1-(2-oxo-2-phenylethyl)pyridin-1-ium bromide [10] (**5v**) (150 mg, 0.495 mmol, 1 equiv), NiBr<sub>2</sub>·3H<sub>2</sub>O (27 mg, 0.10 mmol, 0.2 equiv) and 3-(2-bromophenyl)-2*H*-azirine (**4a**) (145 mg, 0.74 mmol, 1.5 equiv) in acetone (10 mL) according to

the general procedure B. Red solid, mp 301–302 °C (dec., acetone). <sup>1</sup>H NMR (400 MHz, DMSO-*d*<sub>6</sub>): δ 12.61 (s, 1H), 9.17 (d, *J* = 6.2 Hz, 2H), 8.66 (d, *J* = 6.3 Hz, 2H), 7.61 (d, *J* = 8.0 Hz, 1H), 7.51–7.21 (m, 9H). <sup>13</sup>C{<sup>1</sup>H} NMR (101 MHz, DMSO-*d*<sub>6</sub>): δ 147.8 (CH), 133.1 (CH), 132.7 (CH), 131.5 (CH), 130.0 (CH), 129.3 (CH), 128.5 (CH), 128.2 (CH), 127.83 (C), 127.78 (C), 127.1 (CH), 126.9 (C), 123.5 (C), 122.6 (C), 119.5 (CH), 119.1 (C), 114.6 (C). HRMS (ESI) *m/z*: 400.0444 calcd for C<sub>22</sub>H<sub>15</sub><sup>79</sup>BrN<sub>3</sub><sup>+</sup> [M – Br]<sup>+</sup>, found 400.0449.

*4-Benzoyl-1-(4-(2-bromophenyl)-2-phenyl-1H-pyrrol-3-yl)pyridin-1-ium bromide (1w)*. Compound **1w** (155 mg, 42%) was obtained from 4-benzoyl-1-(2-oxo-2-phenylethyl)pyridin-1-ium bromide (**5w**) (250 mg, 0.654 mmol, 1 equiv), NiBr<sub>2</sub>·3H<sub>2</sub>O (43 mg, 0.13 mmol, 0.2 equiv) and 3-(2-bromophenyl)-2*H*-azirine (**4a**) (192 mg, 0.98 mmol, 1.5 equiv) in acetone (20 mL) according to the general procedure B. Bright red solid, mp 280–282 °C (acetone). <sup>1</sup>H NMR (400 MHz, DMSO-*d*<sub>6</sub>): δ 12.55 (br. s, 1H), 9.08 (d, *J* = 6.6 Hz, 2H), 8.34 (d, *J* = 6.6 Hz, 2H), 7.84–7.77 (m, 3H), 7.68–7.62 (m, 3H), 7.51–7.34 (m, 8H), 7.34–7.28 (m, 1H). <sup>13</sup>C{<sup>1</sup>H} NMR (101 MHz, DMSO-*d*<sub>6</sub>): δ 192.6 (C), 152.1 (C), 147.7 (CH), 134.8 (CH), 134.0 (C), 133.2 (CH), 132.8 (CH), 131.8 (C), 130.12 (CH), 130.08 (CH), 129.4 (CH), 129.1 (CH), 128.5 (CH), 128.3 (CH), 128.2 (C), 127.5 (CH), 127.1 (CH), 126.7 (C), 123.6 (C), 122.7 (C), 119.38 (CH), 119.29 (C). HRMS (ESI) *m/z*: 479.0754 calcd for C<sub>28</sub>H<sub>20</sub><sup>79</sup>BrN<sub>2</sub>O<sup>+</sup> [M – Br]<sup>+</sup>, found 479.0774.

*1-(4-(2-Iodophenyl)-2-phenyl-1H-pyrrol-3-yl)pyridin-1-ium bromide (2)*. Compound **2** (272 mg, 75%) was obtained from 1-(2-oxo-2-phenylethyl)pyridin-1-ium bromide (**5a**) (200 mg, 0.72 mmol, 1 equiv), triethylamine (109 mg, 1.08 mmol, 1.5 equiv) and 3-(2-iodophenyl)-2*H*-azirine (262 mg, 1.08 mmol, 1.5 equiv) in DCM (4 mL) according to the general procedure A. Yellow solid, mp 318–320 °C (DCM). <sup>1</sup>H NMR (400 MHz, DMSO-*d*<sub>6</sub>): δ 12.41 (s, 1H), 8.96–8.84 (m, 2H), 8.67 (tt, *J* = 7.9, 1.4 Hz, 1H), 8.20–8.09 (m, 2H), 7.93–7.78 (m, 1H), 7.43–7.32 (m, 5H), 7.28 (d, *J* = 2.9 Hz, 1H), 7.23–7.19 (m, 2H), 7.08 (ddd, *J* = 7.9, 6.5, 2.5 Hz, 1H). <sup>13</sup>C{<sup>1</sup>H} NMR (101 MHz, DMSO-*d*<sub>6</sub>): δ 147.1 (CH), 147.0 (CH), 139.0 (CH), 136.2 (C), 131.9 (CH), 130.0 (CH), 129.3 (CH), 128.6 (CH), 128.5 (CH), 128.4 (C), 128.3 (CH), 126.6 (CH), 126.1 (C), 122.8 (C), 122.7 (C), 118.7 (CH), 101.6 (C). HRMS (ESI) *m/z*: 423.0353 calc for C<sub>21</sub>H<sub>16</sub>IN<sub>2</sub><sup>+</sup> [M – Br]<sup>+</sup>, found 423.0368.

*1-(1-Benzyl-4-(2-iodophenyl)-2-phenyl-1H-pyrrol-3-yl)pyridin-1-ium bromide (N-Bn-2)*. Compound *N*-Bn-**2** (339 mg, 73%) was obtained from 4-(2-iodophenyl)-2-phenyl-3-(pyridin-1-ium-1-yl)pyrrol-1-ide (331 mg, 0.78 mmol), benzyl bromide (469 mg, 2.74 mmol, 3.5 equiv) and K<sub>2</sub>CO<sub>3</sub> (216 mg, 1.57 mmol, 2 equiv) in acetonitrile (12 mL) likewise *N*-Bn-**1**. Yellow solid, mp 220–222 °C (MeCN). <sup>1</sup>H NMR (400 MHz, DMSO-*d*<sub>6</sub>): δ 8.79 (d, *J* = 6.0 Hz, 2H), 8.56 (t, *J* =

7.9 Hz, 1H), 8.04 (t,  $J$  = 7.0 Hz, 2H), 7.89 (d,  $J$  = 7.9 Hz, 1H), 7.49 (s, 1H), 7.46–7.22 (m, 10H), 7.14–7.02 (m, 3H), 5.30 (s, 2H).  $^{13}\text{C}\{^1\text{H}\}$  NMR (101 MHz, DMSO- $d_6$ ):  $\delta$  146.73 (CH), 146.70 (CH), 139.1 (CH), 137.2 (C), 135.8 (C), 131.7 (CH), 130.2 (CH), 130.0 (CH), 129.4 (CH), 129.1 (CH), 128.61 (CH), 128.59 (CH), 128.1 (CH), 127.6 (CH), 126.8 (C), 126.7 (CH), 124.2 (CH), 122.1 (C), 121.0 (C), 101.3 (C), 50.7 (CH<sub>2</sub>). HRMS (ESI)  $m/z$ : 513.0822 calcd for C<sub>28</sub>H<sub>22</sub>IN<sub>2</sub><sup>+</sup> [M – Br]<sup>+</sup>, found 513.0839.

**General procedure C for the radical cyclization with TTMSS/AIBN.** To a suspension of pyrrolylpyridinium bromide (1 equiv) and AIBN (2 equiv) in dry MeCN ( $C_{\text{salt}}$  = 10 mg/mL) in a screw top vial TTMSS (1.5 equiv) was added. Then argon was bubbled through the reaction mixture for 15 min. Then vial was screwed and reaction mixture was vigorously stirred at 75 °C for 25 h (the completion of the reaction was checked by NMR of the reaction mixture). Then it was cooled down, ethyl acetate (MeCN/EtOAc, v/v 1:6) was added. The solution was kept in a refrigerator for 2–3 h, the precipitate was collected, washed with ethyl acetate and hexane and dried.

*3-Phenylpyrido[2,1-*a*]pyrrolo[3,4-*c*]isoquinolin-2-ium bromide (3a).* Compound **3a** (122 mg, 74%) was obtained from 1-(4-(2-bromophenyl)-2-phenyl-1*H*-pyrrol-3-yl)pyridin-1-ium bromide (**1a**) (201 mg, 0.44 mmol, 1 equiv), TTMSS (163 mg, 0.65 mmol, 1.5 equiv) and AIBN (144 mg, 0.87 mmol, 2 equiv) according to the general procedure C. Orange solid, mp > 400 °C (MeCN/EtOAc).  $^1\text{H}$  NMR (400 MHz, DMSO- $d_6$ ):  $\delta$  13.14 (br. s, 1H), 9.39 (d,  $J$  = 8.5 Hz, 1H), 9.13 (d,  $J$  = 6.6 Hz, 1H), 8.92 (d,  $J$  = 8.5 Hz, 1H), 8.53–8.47 (m, 1H), 8.46 (d,  $J$  = 7.9 Hz, 1H), 8.34 (d,  $J$  = 3.1 Hz, 1H), 8.02–7.97 (m, 2H), 7.76–7.61 (m, 6H).  $^{13}\text{C}\{^1\text{H}\}$  NMR (101 MHz, DMSO- $d_6$ ):  $\delta$  142.7 (C), 140.0 (CH), 135.0 (CH), 133.9 (CH), 130.7 (C), 130.2 (CH), 129.6 (CH), 129.51 (C), 129.45 (CH), 127.1 (CH), 126.7 (CH), 124.4 (CH), 124.1 (CH), 123.1 (CH), 121.6 (C), 120.9 (C), 117.5 (C), 113.9 (C), 112.5 (CH). HRMS (ESI)  $m/z$ : 295.1230 calcd for C<sub>21</sub>H<sub>15</sub>N<sub>2</sub><sup>+</sup> [M – Br]<sup>+</sup>, found 295.1242.

**Gram scale experiment.** Compound **3a** (736 mg, 88%) was obtained from 1-(4-(2-bromophenyl)-2-phenyl-1*H*-pyrrol-3-yl)pyridin-1-ium bromide (**1a**) (1 g, 2.19 mmol, 1 equiv), TTMSS (819 mg, 3.29 mmol, 1.5 equiv) and AIBN (718 mg, 4.38 mmol, 2 equiv) according to the general procedure C.

*2-Methyl-3-phenylpyrido[2,1-*a*]pyrrolo[3,4-*c*]isoquinolin-4-ium iodide (N-Me-3a).* Compound *N*-Me-**3a** (62 mg, 73%) was obtained from 1-(4-(2-bromophenyl)-1-methyl-2-phenyl-1*H*-pyrrol-3-yl)pyridin-1-ium iodide (*N*-Me-**1a**) (100 mg, 0.19 mmol, 1 equiv), TTMSS (71 mg, 0.28

mmol, 1.5 equiv) and AIBN (62 mg, 0.38 mmol, 2 equiv) according to the general procedure C. Compound *N*-Me-**3a** (15 mg, 100%) was obtained from 3-phenylpyrido[2,1-*a*]pyrrolo[3,4-*c*]isoquinoline (**6a**) (10 mg, 0.035 mmol) and methyl iodide (5 mg, 0.035 mmol, 1 equiv) in dry DCM (2 mL). The reaction mixture was stirred for 24 h and evaporated. The product was dried under vacuum. Orange solid, mp 279–281 °C (MeCN/EtOAc). <sup>1</sup>H NMR (400 MHz, DMSO-*d*<sub>6</sub>): δ 9.38 (d, *J* = 8.7 Hz, 1H), 8.92 (d, *J* = 8.5 Hz, 1H), 8.81 (d, *J* = 6.7 Hz, 1H), 8.50–8.45 (m, 1H), 8.40 (s, 1H), 8.38 (d, *J* = 11.5 Hz, 1H), 8.04–7.97 (m, 1H), 7.95–7.88 (m, 1H), 7.78–7.63 (m, 6H), 3.71 (s, 3H). <sup>13</sup>C{<sup>1</sup>H} NMR (101 MHz, DMSO-*d*<sub>6</sub>): δ 142.6 (C), 139.8 (CH), 134.3 (CH), 134.1 (CH), 131.3 (CH), 130.5 (CH), 130.0 (CH), 129.3 (C), 128.9 (C), 127.2 (CH), 126.8 (CH), 124.4 (CH), 124.1 (CH), 122.8 (CH), 122.7 (C), 120.8 (C), 118.3 (C), 116.1 (CH), 112.3 (C), 36.2 (CH<sub>3</sub>). HRMS (ESI) *m/z*: 309.1387 calcd for C<sub>22</sub>H<sub>17</sub>N<sub>2</sub><sup>+</sup> [M – I]<sup>+</sup>, found 309.1383.

*2-Benzyl-3-phenylpyrido[2,1-*a*]pyrrolo[3,4-*c*]isoquinolin-4-ium bromide (N-Bn-3a)*. Compound *N*-Bn-**3a** (54 mg, 64% from *N*-Bn-**1a**; 56 mg, 67% from *N*-Bn-**2**) was obtained from 1-(1-benzyl-4-(2-bromophenyl)-2-phenyl-1*H*-pyrrol-3-yl)pyridin-1-ium bromide (*N*-Bn-**1a**) (100 mg, 0.18 mmol, 1 equiv) or 1-(1-benzyl-4-(2-iodophenyl)-2-phenyl-1*H*-pyrrol-3-yl)pyridin-1-ium bromide (*N*-Bn-**2**) (107 mg, 0.18 mmol, 1 equiv), TTMSS (68 mg, 0.27 mmol, 1.5 equiv) and AIBN (60 mg, 0.37 mmol, 2 equiv) according to the general procedure C.

3-Phenylpyrido[2,1-*a*]pyrrolo[3,4-*c*]isoquinoline (**6a**) (14.5 mg, 0.05 mmol), benzyl bromide (9 mg, 0.05 mmol, 1 equiv) and K<sub>2</sub>CO<sub>3</sub> (7 mg, 0.10 mmol, 2 equiv) was mixed in dry acetonitrile (4 mL). The reaction mixture was heated at 40 °C for 24 h, evaporated. The residue was washed with water and Et<sub>2</sub>O and dried under vacuum to obtain compound *N*-Bn-**3a** (23 mg, 100%). Yellow to brown solid, mp 249–250 °C (dec., MeCN/EtOAc). <sup>1</sup>H NMR (400 MHz, CDCl<sub>3</sub>): δ 9.47 (d, *J* = 8.8 Hz, 1H), 8.83–8.74 (m, 2H), 8.68 (d, *J* = 1.4 Hz, 1H), 8.12 (dd, *J* = 8.0, 1.3 Hz, 1H), 7.99 (s, 1H), 7.83–7.73 (m, 2H), 7.70–7.60 (m, 4H), 7.48–7.42 (m, 2H), 7.32–7.27 (m, 3H), 7.02–6.96 (m, 2H), 5.23 (s, 2H). <sup>13</sup>C{<sup>1</sup>H} NMR (126 MHz, CDCl<sub>3</sub>): δ 143.1 (C), 140.9 (CH), 135.8 (C), 134.3 (CH), 133.8 (CH), 131.7 (CH), 131.4 (CH), 130.6 (CH), 129.14 (C), 129.1 (CH), 129.0 (C), 128.5 (CH), 128.0 (C), 127.5 (CH), 127.1 (CH), 125.7 (CH), 124.6 (CH), 123.3 (CH), 123.2 (C), 120.8 (C), 118.8 (C), 115.2 (CH), 113.6 (C), 53.0 (CH<sub>2</sub>). HRMS (ESI) *m/z*: 385.1699 calcd for C<sub>28</sub>H<sub>21</sub>N<sub>2</sub><sup>+</sup> [M – Br]<sup>+</sup>, found 385.1711.

*3-(4-Fluorophenyl)pyrido[2,1-*a*]pyrrolo[3,4-*c*]isoquinolin-2-ium bromide (3b)*. Compound **3b** (80 mg, 60%) was obtained from 1-(4-(2-bromophenyl)-2-(4-fluorophenyl)-1*H*-pyrrol-3-yl)pyridin-1-ium bromide (**1b**) (160 mg, 0.34 mmol, 1 equiv), TTMSS (126 mg, 0.506 mmol, 1.5 equiv) and AIBN (111 mg, 0.676 mmol, 2 equiv) according to the general procedure C. Orange

solid, mp 321–322 °C (MeCN/EtOAc). <sup>1</sup>H NMR (400 MHz, DMSO-*d*<sub>6</sub>): δ 13.13 (s, 1H), 9.39 (d, *J* = 8.8 Hz, 1H), 9.08 (d, *J* = 6.8 Hz, 1H), 8.91 (d, *J* = 8.5 Hz, 1H), 8.57–8.41 (m, 2H), 8.33 (d, *J* = 3.2 Hz, 1H), 8.03–7.94 (m, 2H), 7.82–7.69 (m, 3H), 7.55–7.47 (m, 2H). <sup>13</sup>C{<sup>1</sup>H} NMR (126 MHz, DMSO-*d*<sub>6</sub>): δ 162.8 (d, *J* = 247.2 Hz, C), 142.8 (C), 140.0 (CH), 135.3 (CH), 134.0 (CH), 132.7 (CH), 132.6 (CH), 129.6 (C), 127.1 (d, *J* = 3.1 Hz, C), 127.0 (d, *J* = 59.2 Hz, CH), 124.4 (CH), 124.3 (CH), 123.1 (CH), 121.0 (C), 120.6 (C), 117.8 (C), 116.5 (d, *J* = 21.7 Hz, CH), 113.9 (C), 112.4 (CH). HRMS (ESI) *m/z*: 313.1136 calcd for C<sub>21</sub>H<sub>14</sub>FN<sub>2</sub><sup>+</sup> [M – Br]<sup>+</sup>, found 313.1148.

*3-(4-Chlorophenyl)pyrido[2,1-*a*]pyrrolo[3,4-*c*]isoquinolin-2-ium bromide (3c)*. Compound **3c** (118 mg, 71%) was obtained from 1-(4-(2-bromophenyl)-2-(4-chlorophenyl)-1*H*-pyrrol-3-yl)pyridin-1-ium bromide (**1c**) (200 mg, 0.41 mmol, 1 equiv), TTMSS (152 mg, 0.61 mmol, 1.5 equiv) and AIBN (133 mg, 0.82 mmol, 2 equiv) according to the general procedure C. Orange solid, mp > 400 °C (MeCN/EtOAc). <sup>1</sup>H NMR (400 MHz, DMSO-*d*<sub>6</sub>): δ 13.16 (s, 1H), 9.39 (d, *J* = 8.8 Hz, 1H), 9.11 (d, *J* = 6.6 Hz, 1H), 8.92 (d, *J* = 8.5 Hz, 1H), 8.56–8.50 (m, 1H), 8.46 (d, *J* = 7.9 Hz, 1H), 8.36 (d, *J* = 3.3 Hz, 1H), 8.05–7.95 (m, 2H), 7.74 (s, 5H). <sup>13</sup>C{<sup>1</sup>H} NMR (101 MHz, DMSO-*d*<sub>6</sub>): δ 142.8 (CH), 140.1 (C), 135.5 (CH), 134.3 (C), 134.0 (CH), 132.0 (CH), 129.52 (CH), 129.48 (C), 127.3 (CH), 126.8 (CH), 124.33 (CH), 124.31 (CH), 123.1 (CH), 121.0 (C), 120.4 (C), 117.9 (C), 114.1 (C), 112.8 (CH). HRMS (ESI) *m/z*: 329.0845 calcd for C<sub>21</sub>H<sub>14</sub>ClN<sub>2</sub><sup>+</sup> [M – Br]<sup>+</sup>, found 329.0849.

*3-(4-Methylphenyl)pyrido[2,1-*a*]pyrrolo[3,4-*c*]isoquinolin-2-ium bromide (3e)*. Compound **3e** (96 mg, 58%) was obtained from 1-(4-(2-bromophenyl)-2-(4-methylphenyl)-1*H*-pyrrol-3-yl)pyridin-1-ium bromide (**1e**) (200 mg, 0.42 mmol, 1 equiv), TTMSS (158 mg, 0.64 mmol, 1.5 equiv) and AIBN (139 mg, 0.85 mmol, 2 equiv) according to the general procedure C. Pale yellow solid, mp > 400 °C (MeCN/EtOAc). <sup>1</sup>H NMR (400 MHz, DMSO-*d*<sub>6</sub>): δ 13.13–13.01 (m, 1H), 9.41–9.32 (m, 1H), 9.16 (dd, *J* = 6.8, 1.3 Hz, 1H), 8.89 (d, *J* = 8.4 Hz, 1H), 8.53–8.47 (m, 1H), 8.43 (d, *J* = 8.7 Hz, 1H), 8.47–8.41 (m, 1H), 8.30 (d, *J* = 3.2 Hz, 1H), 8.02–7.93 (m, 2H), 7.75–7.68 (m, 1H), 7.63–7.57 (m, 2H), 7.47 (d, *J* = 7.9 Hz, 2H), 2.47 (s, 3H). <sup>13</sup>C{<sup>1</sup>H} NMR (101 MHz, DMSO-*d*<sub>6</sub>): δ 142.7 (C), 140.0 (CH), 135.0 (CH), 133.9 (CH), 130.7 (C), 130.2 (CH), 129.6 (CH), 129.51 (C), 129.5 (CH), 127.1 (CH), 126.7 (CH), 124.4 (CH), 124.1 (CH), 123.1 (CH), 121.6 (C), 120.9 (C), 117.5 (C), 113.9 (C), 112.5 (CH), 21.0 (CH<sub>3</sub>). HRMS (ESI) *m/z*: 309.1386 calc for C<sub>22</sub>H<sub>17</sub>N<sub>2</sub><sup>+</sup> [M – Br]<sup>+</sup>, found 309.1382.

*3-(4-Methoxyphenyl)pyrido[2,1-*a*]pyrrolo[3,4-*c*]isoquinolin-2-ium bromide (3f)*. Compound **3f** (116 mg, 70%) was obtained from 1-(4-(2-bromophenyl)-2-(4-methoxyphenyl)-1*H*-pyrrol-3-

yl)pyridin-1-ium bromide (**1f**) (200 mg, 0.41 mmol, 1 equiv), TTMSS (153 mg, 0.62 mmol, 1.5 equiv) and AIBN (135 mg, 0.82 mmol, 2 equiv) according to the general procedure C. Red solid, mp > 400 °C (MeCN/EtOAc). <sup>1</sup>H NMR (400 MHz, DMSO-*d*<sub>6</sub>): δ 13.03 (s, 1H), 9.37 (d, *J* = 8.7 Hz, 1H), 9.18 (d, *J* = 6.7 Hz, 1H), 8.90 (d, *J* = 8.5 Hz, 1H), 8.53–8.41 (m, 2H), 8.28 (d, *J* = 3.2 Hz, 1H), 8.01–7.94 (m, 2H), 7.76–7.69 (m, 1H), 7.66–7.59 (m, 2H), 7.25–7.18 (m, 2H), 3.89 (s, 3H). <sup>13</sup>C{<sup>1</sup>H} NMR (101 MHz, DMSO-*d*<sub>6</sub>): δ 160.0 (C), 142.5 (C), 139.7 (CH), 134.7 (CH), 133.8 (CH), 131.6 (CH), 129.5 (C), 127.0 (CH), 126.6 (CH), 124.3 (CH), 124.1 (CH), 123.0 (CH), 122.5 (C), 121.5 (C), 120.8 (C), 117.2 (C), 114.9 (CH), 113.6 (C), 111.9 (CH), 55.4 (CH<sub>3</sub>). HRMS (ESI) *m/z*: 325.1340 calcd for C<sub>22</sub>H<sub>17</sub>N<sub>2</sub>O<sup>+</sup> [M – Br]<sup>+</sup>, found 325.1347.

*3-(2-Methoxyphenyl)pyrido[2,1-*a*]pyrrolo[3,4-*c*]isoquinolin-2-ium bromide (3g)*. Compound **3g** (42 mg, 63%) was obtained from 1-(4-(2-bromophenyl)-2-(2-methoxyphenyl)-1*H*-pyrrol-3-yl)pyridin-1-ium bromide (**1g**) (80 mg, 0.16 mmol, 1 equiv), TTMSS (61 mg, 0.25 mmol, 1.5 equiv) and AIBN (54 mg, 0.33 mmol, 2 equiv) according to the general procedure C. Orange solid, mp 240 °C (dec., MeCN/EtOAc). <sup>1</sup>H NMR (400 MHz, DMSO-*d*<sub>6</sub>): δ 13.06 (br. s, 1H), 9.38 (d, *J* = 8.7 Hz, 1H), 8.91 (d, *J* = 8.4 Hz, 1H), 8.83–8.77 (m, 1H), 8.56–8.48 (m, 1H), 8.44 (d, *J* = 7.9 Hz, 1H), 8.34 (d, *J* = 3.3 Hz, 1H), 8.05–7.96 (m, 2H), 7.76–7.68 (m, 1H), 7.67–7.60 (m, 2H), 7.32 (d, *J* = 8.2 Hz, 1H), 7.28–7.23 (m, 1H), 3.65 (s, 3H). <sup>13</sup>C{<sup>1</sup>H} NMR (126 MHz, DMSO-*d*<sub>6</sub>): δ 156.6 (C), 142.6 (C), 139.7 (CH), 135.9 (CH), 134.0 (CH), 131.8 (CH), 131.6 (CH), 129.6 (C), 127.2 (CH), 126.8 (CH), 123.9 (CH), 123.8 (CH), 123.1 (CH), 121.3 (CH), 120.9 (C), 119.0 (C), 118.5 (C), 117.8 (C), 113.7 (C), 112.6 (CH), 112.3 (CH), 55.4 (CH<sub>3</sub>). HRMS (ESI) *m/z*: 325.1335 calcd for C<sub>22</sub>H<sub>16</sub>N<sub>2</sub>O<sup>+</sup> [M – Br]<sup>+</sup>, found 325.1331.

*3-(3-Methoxyphenyl)pyrido[2,1-*a*]pyrrolo[3,4-*c*]isoquinolin-2-ium bromide (3h)*. Compound **3h** (122 mg, 74%) was obtained from 1-(4-(2-bromophenyl)-2-(3-methoxyphenyl)-1*H*-pyrrol-3-yl)pyridin-1-ium bromide (**1h**) (200 mg, 0.412 mmol, 1 equiv), TTMSS (154 mg, 0.617 mmol, 1.5 equiv) and AIBN (135 mg, 0.823 mmol, 2 equiv) according to the general procedure C. Pale orange solid, mp 230–231 °C (dec., MeCN/EtOAc). <sup>1</sup>H NMR (400 MHz, DMSO-*d*<sub>6</sub>): δ 13.14 (s, 1H), 9.38 (d, *J* = 8.8 Hz, 1H), 9.18 (d, *J* = 6.7 Hz, 1H), 8.90 (d, *J* = 8.4 Hz, 1H), 8.54–8.49 (m, 1H), 8.44 (d, *J* = 7.9 Hz, 1H), 8.32 (d, *J* = 3.3 Hz, 1H), 8.04–7.91 (m, 2H), 7.74–7.69 (m, 1H), 7.60–7.55 (m, 1H), 7.34–7.24 (m, 2H), 7.19 (dd, *J* = 8.4, 2.6 Hz, 1H), 3.84 (s, 3H). <sup>13</sup>C{<sup>1</sup>H} NMR (126 MHz, DMSO-*d*<sub>6</sub>): δ 159.8 (C), 142.8 (C), 140.0 (CH), 135.4 (CH), 133.9 (CH), 131.9 (C), 130.7 (CH), 129.5 (C), 127.2 (CH), 126.7 (CH), 124.3 (CH), 124.1 (CH), 123.1 (CH), 122.2 (CH), 121.5 (C), 121.0 (C), 117.5 (C), 115.5 (CH), 115.4 (CH), 114.0, 112.4 (CH), 55.4 (CH<sub>3</sub>). HRMS (ESI) *m/z*: 325.1335 calcd for C<sub>22</sub>H<sub>16</sub>N<sub>2</sub>O<sup>+</sup> [M – Br]<sup>+</sup>, found 325.1339.

*3-(2,4-Dimethoxyphenyl)pyrido[2,1-*a*]pyrrolo[3,4-*c*]isoquinolin-2-ium bromide (3i).* Compound **3i** (160 mg, 93%) was obtained from 1-(4-(2-bromophenyl)-2-(2,4-dimethoxyphenyl)-1*H*-pyrrol-3-yl)pyridin-1-ium bromide (**1i**) (200 mg, 0.388 mmol, 1 equiv), TTMSS (145 mg, 0.581 mmol, 1.5 equiv) and AIBN (127 mg, 0.775 mmol, 2 equiv) according to the general procedure C. Orange solid, mp 212–213 °C (MeCN/EtOAc). <sup>1</sup>H NMR (400 MHz, DMSO-*d*<sub>6</sub>): δ 12.96 (s, 1H), 9.36 (d, *J* = 8.7 Hz, 1H), 8.94–8.81 (m, 2H), 8.54–8.48 (m, 1H), 8.42 (dd, *J* = 8.1, 1.2 Hz, 1H), 8.28 (d, *J* = 3.2 Hz, 1H), 8.08–7.99 (m, 1H), 8.00–7.93 (m, 1H), 7.74–7.67 (m, 1H), 7.57–7.50 (m, 1H), 6.88–6.80 (m, 2H), 3.91 (s, 3H), 3.65 (s, 3H). <sup>13</sup>C{<sup>1</sup>H} NMR (101 MHz, DMSO-*d*<sub>6</sub>): δ 162.2 (C), 157.9 (C), 142.5 (C), 139.6 (CH), 135.6 (CH), 133.9 (CH), 132.6 (CH), 129.7 (C), 127.1 (CH), 126.8 (CH), 123.9 (CH), 123.1 (CH), 120.9 (C), 118.2 (C), 117.9 (C), 113.5 (C), 112.1 (CH), 111.3 (C), 106.2 (CH), 99.3 (CH), 55.6 (CH<sub>3</sub>), 55.5 (CH<sub>3</sub>). HRMS (ESI) *m/z*: 355.1441 calcd for C<sub>23</sub>H<sub>18</sub>N<sub>2</sub>O<sub>2</sub><sup>+</sup> [M – Br]<sup>+</sup>, found 355.1458.

*3-(4-Cyanophenyl)pyrido[2,1-*a*]pyrrolo[3,4-*c*]isoquinolin-2-ium bromide (3l).* Compound **3l** (122 mg, 73%) was obtained from 1-(4-(2-bromophenyl)-2-(4-cyanophenyl)-1*H*-pyrrol-3-yl)pyridin-1-ium bromide (**1l**) (200 mg, 0.416 mmol, 1 equiv), TTMSS (155 mg, 0.624 mmol, 1.5 equiv) and AIBN (137 mg, 0.832 mmol, 2 equiv) according to the general procedure C. Orange solid, mp > 400 °C (MeCN/EtOAc). <sup>1</sup>H NMR (500 MHz, DMSO-*d*<sub>6</sub>): δ 13.38–13.26 (m, 1H), 9.41 (d, *J* = 8.7 Hz, 1H), 9.05 (d, *J* = 6.6 Hz, 1H), 8.92 (d, *J* = 8.5 Hz, 1H), 8.59–8.52 (m, 1H), 8.51–8.40 (m, 2H), 8.13 (d, *J* = 8.2 Hz, 2H), 8.01–7.90 (m, 4H), 7.78–7.73 (m, 1H). <sup>13</sup>C{<sup>1</sup>H} NMR (126 MHz, DMSO-*d*<sub>6</sub>): δ 143.0 (C), 140.4 (CH), 136.0 (CH), 135.2 (C), 134.0 (CH), 133.2 (CH), 130.8 (CH), 129.3 (C), 127.4 (CH), 126.7 (CH), 124.38 (C), 124.35 (CH), 123.1 (CH), 121.1 (C), 119.9 (C), 118.6 (C), 118.4 (C), 114.5 (C), 113.8 (CH), 111.7 (C). HRMS (ESI) *m/z*: 320.1182 calcd for C<sub>22</sub>H<sub>14</sub>N<sub>3</sub><sup>+</sup> [M – Br]<sup>+</sup>, found 320.1178.

*3-(Pyridin-2-yl)pyrido[2,1-*a*]pyrrolo[3,4-*c*]isoquinolin-2-ium iodide (3m).* Compound **3m** (160 mg, 92%) was obtained from 1-(4-(2-bromophenyl)-2-(pyridin-2-yl)-1*H*-pyrrol-3-yl)pyridin-1-ium iodide (**1m**) (200 mg, 0.49 mmol, 1 equiv), TTMSS (153 mg, 0.62 mmol, 1.5 equiv) and AIBN (135 mg, 0.82 mmol, 2 equiv) according to the general procedure C. Orange solid, mp > 400 °C (MeCN/EtOAc). <sup>1</sup>H NMR (400 MHz, DMSO-*d*<sub>6</sub>): δ 11.57 (d, *J* = 6.7 Hz, 1H), 9.18 (dd, *J* = 8.8, 1.5 Hz, 1H), 8.73 (d, *J* = 8.4 Hz, 1H), 8.57 (dd, *J* = 5.0, 1.8 Hz, 1H), 8.29–8.19 (m, 3H), 8.06 (s, 1H), 7.94–7.88 (m, 1H), 7.83–7.77 (m, 2H), 7.51–7.45 (m, 1H), 7.22–7.17 (m, 1H). <sup>13</sup>C{<sup>1</sup>H} NMR (101 MHz, DMSO-*d*<sub>6</sub>): δ 156.8 (C), 147.2 (CH), 139.5 (C), 138.6 (CH), 136.4 (CH), 135.0 (CH), 132.8 (CH), 131.0 (C), 127.9 (C), 125.9 (CH), 124.5 (CH), 123.4 (CH), 123.0



(CH), 122.66 (CH), 122.20 (CH), 122.08 (CH), 120.9 (C), 119.8 (CH), 118.9 (C), 116.7 (C). HRMS (ESI)  $m/z$ : 296.1182 calcd for  $C_{20}H_{14}N_3^+$   $[M - I]^+$ , found 296.1186.

*7-Methyl-3-phenylpyrido[2,1-*a*]pyrrolo[3,4-*c*]isoquinolin-2-ium bromide (3n).* Compound **3n** (128 mg, 77%) was obtained from 1-(4-(2-bromophenyl)-2-phenyl-1*H*-pyrrol-3-yl)-4-methylpyridin-1-ium bromide (**1n**) (200 mg, 0.425 mmol, 1 equiv), TTMSS (158 mg, 0.64 mmol, 1.5 equiv) and AIBN (140 mg, 0.85 mmol, 2 equiv) according to the general procedure C. Orange solid, mp > 400 °C (MeCN/EtOAc).  $^1H$  NMR (400 MHz, DMSO- $d_6$ ):  $\delta$  13.03 (s, 1H), 9.28–9.24 (m, 1H), 8.95 (d,  $J$  = 6.9 Hz, 1H), 8.90 (d,  $J$  = 8.4 Hz, 1H), 8.42 (dd,  $J$  = 8.0, 1.3 Hz, 1H), 8.29 (d,  $J$  = 3.2 Hz, 1H), 7.99–7.92 (m, 1H), 7.84 (dd,  $J$  = 7.0, 1.8 Hz, 1H), 7.75–7.61 (m, 6H), 2.69 (s, 3H).  $^{13}C\{^1H\}$  NMR (101 MHz, DMSO- $d_6$ ):  $\delta$  152.9 (C), 142.1 (C), 134.1 (CH), 133.7 (CH), 130.7 (C), 130.1 (CH), 129.5 (CH), 129.4 (C), 127.0 (CH), 126.6 (CH), 125.2 (CH), 123.9 (CH), 123.4 (C), 123.1 (CH), 121.2 (C), 120.7 (C), 117.2 (C), 113.6 (C), 112.5 (CH), 21.4 (CH<sub>3</sub>). HRMS (ESI)  $m/z$ : 309.1386 calcd for  $C_{22}H_{17}N_2^+$   $[M - Br]^+$ , found 309.1390.

*7-Methoxy-3-phenylpyrido[2,1-*a*]pyrrolo[3,4-*c*]isoquinolin-2-ium bromide (3o).* Compound **3o** (119 mg, 72%) was obtained from 1-(4-(2-bromophenyl)-2-phenyl-1*H*-pyrrol-3-yl)-4-methoxypyridin-1-ium bromide (**1o**) (200 mg, 0.41 mmol, 1 equiv), TTMSS (153 mg, 0.616 mmol, 1.5 equiv) and AIBN (134 mg, 0.82 mmol, 2 equiv) according to the general procedure C. Yellow-green solid, mp 213–214 °C (MeCN/EtOAc).  $^1H$  NMR (400 MHz, DMSO- $d_6$ ):  $\delta$  12.86 (s, 1H), 8.95–8.88 (m, 2H), 8.63 (d,  $J$  = 2.9 Hz, 1H), 8.37 (d,  $J$  = 7.9 Hz, 1H), 8.22 (d,  $J$  = 3.2 Hz, 1H), 7.96–7.90 (m, 1H), 7.71–7.59 (m, 7H), 4.21 (s, 3H).  $^{13}C\{^1H\}$  NMR (101 MHz, DMSO- $d_6$ ):  $\delta$  166.9 (C), 145.1 (C), 136.7 (CH), 133.6 (CH), 130.8 (C), 130.2 (CH), 129.4 (CH), 129.3 (CH), 129.3 (C), 127.0 (CH), 126.7 (CH), 122.9 (CH), 120.6 (C), 120.3 (C), 117.0 (C), 112.9 (CH), 112.5 (CH), 106.8 (CH), 58.0 (CH<sub>3</sub>). HRMS (ESI)  $m/z$ : 325.1335 calcd for  $C_{22}H_{17}N_2O^+$   $[M - Br]^+$ , found 325.1348.

*7-(Dimethylamino)-3-phenylpyrido[2,1-*a*]pyrrolo[3,4-*c*]isoquinolin-2-ium bromide (3p).* Compound **3p** (215 mg, 85%) was obtained from 1-(4-(2-bromophenyl)-2-phenyl-1*H*-pyrrol-3-yl)-4-(dimethylamino)pyridin-1-ium bromide (**1p**) (300 mg, 0.40 mmol, 1 equiv), TTMSS (223 mg, 0.60 mmol, 1.5 equiv) and AIBN (198 mg, 0.80 mmol, 2 equiv) according to the general procedure C. Yellow solid, mp 355–357 °C (dec., MeCN/EtOAc).  $^1H$  NMR (400 MHz, DMSO- $d_6$ ):  $\delta$  12.47 (d,  $J$  = 3.2 Hz, 1H), 8.68 (d,  $J$  = 8.4 Hz, 1H), 8.31 (d,  $J$  = 7.9 Hz, 1H), 8.19–8.14 (m, 1H), 7.99 (d,  $J$  = 3.2 Hz, 1H), 7.78–7.70 (m, 2H), 7.64–7.56 (m, 5H), 7.53–7.47 (m, 1H), 7.14 (dd,  $J$  = 7.9, 3.0 Hz, 1H), 3.36–3.18 (m, 6H).  $^{13}C\{^1H\}$  NMR (101 MHz, DMSO- $d_6$ ):  $\delta$  153.6 (C), 142.1 (C), 134.0 (CH), 132.5 (CH), 131.2 (C), 130.1 (CH), 129.2 (CH), 120.0 (CH), 126.4 (CH),

126.3 (CH), 122.8 (CH), 120.9 (C), 118.8 (C), 116.8 (C), 112.4 (CH), 111.9 (C), 107.7 (CH), 101.1 (CH), 39.9 (CH<sub>3</sub>). HRMS (ESI) *m/z*: 338.1652 calcd for C<sub>23</sub>H<sub>20</sub>N<sub>3</sub><sup>+</sup> [M – Br]<sup>+</sup>, found 338.1656.

*3,7-Diphenylpyrido[2,1-*a*]pyrrolo[3,4-*c*]isoquinolin-2-ium bromide (3q).* Compound **3q** (68 mg, 53%) was obtained from 1-(4-(2-bromophenyl)-2-phenyl-1*H*-pyrrol-3-yl)-4-phenylpyridin-1-ium bromide (**1q**) (150 mg, 0.282 mmol, 1 equiv), TTMSS (105 mg, 0.56 mmol, 1.5 equiv) and AIBN (92 mg, 0.75 mmol, 2 equiv) according to the general procedure C. Orange solid, mp 220 °C (dec., MeCN/EtOAc). <sup>1</sup>H NMR (400 MHz, DMSO-*d*<sub>6</sub>): δ 13.11 (s, 1H), 9.51 (d, *J* = 2.2 Hz, 1H), 9.22 (d, *J* = 8.5 Hz, 1H), 9.11 (d, *J* = 7.2 Hz, 1H), 8.49–8.39 (m, 2H), 8.32 (d, *J* = 3.2 Hz, 1H), 8.28–8.23 (m, 2H), 8.02–7.96 (m, 1H), 7.81–7.61 (m, 9H). <sup>13</sup>C{<sup>1</sup>H} NMR (101 MHz, DMSO-*d*<sub>6</sub>): δ 112.5 (CH), 149.5 (C), 143.0 (C), 135.0 (CH), 134.0 (C), 133.8 (CH), 131.6 (CH), 130.8 (C), 130.3 (CH), 129.6 (CH), 129.5 (CH), 128.1 (CH), 127.4 (CH), 127.0 (CH), 123.3 (C), 123.0 (CH), 121.4 (C), 121.19 (CH), 121.14 (C), 120.0 (CH), 117.3 (C), 113.8 (C). HRMS (ESI) *m/z*: 371.1543 calcd for C<sub>27</sub>H<sub>19</sub>N<sub>2</sub><sup>+</sup> [M – Br]<sup>+</sup>, found 371.1547.

*7-(4-Methoxyphenyl)-3-phenylpyrido[2,1-*a*]pyrrolo[3,4-*c*]isoquinolin-2-ium bromide (3r).* Compound **3r** (73 mg, 71%) was obtained from 1-(4-(2-bromophenyl)-2-phenyl-1*H*-pyrrol-3-yl)-4-(4-methoxyphenyl)pyridin-1-ium bromide (**1r**) (120 mg, 0.214 mmol, 1 equiv), TTMSS (80 mg, 0.32 mmol, 1.5 equiv) and AIBN (70 mg, 0.43 mmol, 2 equiv) according to the general procedure C. Dark orange solid, mp 230–233 °C (MeCN/EtOAc). <sup>1</sup>H NMR (500 MHz, DMSO-*d*<sub>6</sub>): δ 13.04 (d, *J* = 3.3 Hz, 1H), 9.33 (d, *J* = 2.3 Hz, 1H), 9.15 (d, *J* = 8.5 Hz, 1H), 8.96 (d, *J* = 7.2 Hz, 1H), 8.38 (d, *J* = 7.6 Hz, 1H), 8.34 (d, *J* = 7.4 Hz, 1H), 8.28–8.22 (m, 3H), 7.95–7.90 (m, 1H), 7.75–7.63 (m, 6H), 7.18–7.12 (m, 2H), 3.88 (s, 3H). <sup>13</sup>C{<sup>1</sup>H} NMR (126 MHz, DMSO-*d*<sub>6</sub>): δ 162.3 (C), 149.0 (C), 142.8 (C), 134.7 (CH), 133.7 (CH), 130.8 (C), 130.2 (CH), 129.9 (CH), 129.50 (CH), 129.46 (CH), 127.3 (CH), 126.9 (CH), 125.8 (C), 123.0 (CH), 121.14 (C), 121.12 (C), 120.2 (CH), 118.4 (CH), 117.2 (C), 114.9 (CH), 113.6 (C), 112.5 (CH), 55.6 (CH<sub>3</sub>). HRMS (ESI) *m/z*: 401.1648 calcd for C<sub>28</sub>H<sub>21</sub>N<sub>2</sub>O<sup>+</sup> [M – Br]<sup>+</sup>, found 401.1663.

*6,8-Dimethyl-3-phenylpyrido[2,1-*a*]pyrrolo[3,4-*c*]isoquinolin-2-ium bromide (3s).* Compound **3s** (93 mg, 56%) was obtained from 1-(4-(2-bromophenyl)-2-phenyl-1*H*-pyrrol-3-yl)-3,5-dimethylpyridin-1-ium bromide (**1s**) (200 mg, 0.41 mmol, 1 equiv), TTMSS (154 mg, 0.62 mmol, 1.5 equiv) and AIBN (135 mg, 0.83 mmol, 2 equiv) according to the general procedure C. Orange solid, mp > 400 °C (MeCN/EtOAc). <sup>1</sup>H NMR (400 MHz, DMSO-*d*<sub>6</sub>): δ 13.08 (s, 1H), 8.92–8.87 (m, 1H), 8.68 (d, *J* = 8.5 Hz, 1H), 8.43 (dd, *J* = 7.9, 1.4 Hz, 1H), 8.38 (d, *J* = 1.8 Hz, 1H), 8.26 (d, *J* = 3.2 Hz, 1H), 7.94–7.89 (m, 1H), 7.69–7.60 (m, 6H), 3.08 (s, 3H), 2.24 (s, 3H).

$^{13}\text{C}\{^1\text{H}\}$  NMR (101 MHz, DMSO- $d_6$ ):  $\delta$  145.1 (CH), 136.5 (C), 133.2 (CH), 132.7 (CH), 132.6 (C), 130.8 (C), 130.1 (C), 130.0 (CH), 129.5 (CH), 129.3 (CH), 128.5 (CH), 125.8 (CH), 122.9 (CH), 121.6 (C), 121.5 (C), 117.9 (C), 114.0 (C), 112.1 (CH), 25.6 (CH<sub>3</sub>), 17.3 (CH<sub>3</sub>). HRMS (ESI)  $m/z$ : 323.1543 calcd for  $\text{C}_{23}\text{H}_{19}\text{N}_2^+ [\text{M} - \text{Br}]^+$ , found 323.1538.

*1-(2-(2,4-Dimethoxyphenyl)-2-oxoethyl)pyridin-1-ium bromide (5i)*. Compound **5i** (391 mg, 75%) was obtained from pyridine (122 mg, 1.54 mmol, 1 equiv) and 2-bromo-1-(2,4-dimethoxyphenyl)ethan-1-one (400 mg, 1.54 mmol, 1 equiv) in acetone (10 mL). Pale yellow solid, mp 287–288 °C (acetone).  $^1\text{H}$  NMR (400 MHz, DMSO- $d_6$ ):  $\delta$  8.99 (d,  $J$  = 5.6 Hz, 2H), 8.69 (t,  $J$  = 7.5 Hz, 1H), 8.22 (t,  $J$  = 6.6 Hz, 2H), 7.86 (d,  $J$  = 8.7 Hz, 1H), 6.80 (d,  $J$  = 2.1 Hz, 1H), 6.73 (dd,  $J$  = 8.9, 2.1 Hz, 1H), 6.16 (s, 2H), 4.04 (s, 3H), 3.90 (s, 3H).  $^{13}\text{C}\{^1\text{H}\}$  NMR (101 MHz, DMSO- $d_6$ ):  $\delta$  187.9 (C), 165.8 (C), 162.0 (C), 146.0 (CH), 145.8 (CH), 132.1 (CH), 127.2 (CH), 115.9 (C), 107.0 (CH), 98.2 (CH), 69.4 (CH<sub>2</sub>), 56.2 (CH<sub>3</sub>), 55.8 (CH<sub>3</sub>). HRMS (ESI)  $m/z$ : 258.1125 calcd for  $\text{C}_{15}\text{H}_{16}\text{NO}_3^+ [\text{M} - \text{Br}]^+$ , found 258.1129.

*4-(4-Methoxyphenyl)-1-(2-oxo-2-phenylethyl)pyridin-1-ium bromide (5r)*. Compound **5r** (541 mg, 87%) was obtained from 4-(4-methoxyphenyl)pyridine (300 mg, 1.62 mmol, 1 equiv) and 2-bromo-1-phenylethan-1-one (323 mg, 1.62 mmol, 1 equiv) in acetone (10 mL). White solid, mp 256–257 °C (acetone).  $^1\text{H}$  NMR (400 MHz, DMSO- $d_6$ ):  $\delta$  8.97 (d,  $J$  = 6.8 Hz, 2H), 8.60 (d,  $J$  = 6.9 Hz, 2H), 8.17 (d,  $J$  = 8.8 Hz, 2H), 8.09 (d,  $J$  = 7.5 Hz, 2H), 7.80 (t,  $J$  = 7.4 Hz, 1H), 7.67 (t,  $J$  = 7.7 Hz, 2H), 7.21 (d,  $J$  = 8.8 Hz, 2H), 6.50 (s, 2H), 3.90 (s, 3H).  $^{13}\text{C}\{^1\text{H}\}$  NMR (101 MHz, DMSO- $d_6$ ):  $\delta$  191.0 (C), 162.9 (C), 154.6 (C), 145.8 (CH), 134.6 (CH), 133.6 (C), 130.2 (CH), 129.1 (CH), 128.2 (CH), 125.3 (C), 122.8 (CH), 115.2 (CH), 65.1 (CH<sub>2</sub>), 55.7 (CH<sub>3</sub>). HRMS (ESI)  $m/z$ : 304.1332 calcd for  $\text{C}_{20}\text{H}_{18}\text{NO}_2^+ [\text{M} - \text{Br}]^+$ , found 304.1328.

*4-(Methoxycarbonyl)-1-(2-oxo-2-phenylethyl)pyridin-1-ium bromide (5u)*. Compound **5u** (842 mg, 80%) was obtained from methyl isonicotinate (400 mg, 2.92 mmol, 1 equiv) and 2-bromo-1-phenylethan-1-one (581 mg, 2.92 mmol, 1 equiv) in acetone (5 mL). White solid, mp 178 °C (dec., acetone).  $^1\text{H}$  NMR (400 MHz, DMSO- $d_6$ ):  $\delta$  9.26 (d,  $J$  = 6.5 Hz, 2H), 8.66 (d,  $J$  = 6.5 Hz, 2H), 8.08 (d,  $J$  = 7.5 Hz, 2H), 7.80 (t,  $J$  = 7.4 Hz, 1H), 7.67 (t,  $J$  = 7.7 Hz, 2H), 6.69 (s, 2H), 4.01 (s, 3H).  $^{13}\text{C}\{^1\text{H}\}$  NMR (101 MHz, DMSO- $d_6$ ):  $\delta$  190.3 (C), 162.5 (C), 147.8 (CH), 144.4 (C), 134.7 (CH), 133.5 (C), 129.1 (CH), 128.3 (CH), 127.0 (CH), 66.7 (CH<sub>2</sub>), 53.8 (CH<sub>3</sub>). HRMS (ESI)  $m/z$ : 256.0968 calcd for  $\text{C}_{15}\text{H}_{14}\text{NO}_3^+ [\text{M} - \text{Br}]^+$ , found 256.0973.

*4-Benzoyl-1-(2-oxo-2-phenylethyl)pyridin-1-ium bromide (5w)*. Compound **5w** (291 mg, 84%) was obtained from phenyl(pyridin-4-yl)methanone (166 mg, 0.905 mmol, 1 equiv) and 2-bromo-

1-phenylethan-1-one (180 mg, 0.905 mmol, 1 equiv) in acetone (8 mL). White solid, mp 191–192 °C (acetone). <sup>1</sup>H NMR (400 MHz, DMSO-*d*<sub>6</sub>): δ 9.25 (d, *J* = 6.7 Hz, 1H), 8.51 (d, *J* = 6.7 Hz, 1H), 8.15–8.08 (m, 1H), 7.93–7.86 (m, 1H), 7.85–7.80 (m, 1H), 7.71–7.65 (m, 2H), 6.65 (s, 1H). <sup>13</sup>C NMR{1H} (101 MHz, DMSO-*d*<sub>6</sub>): δ 192.0 (C), 190.4 (C), 152.1 (C), 147.3 (CH), 134.82 (CH), 134.78 (CH), 134.1 (C), 133.5 (C), 130.3 (CH), 129.1 (CH), 128.3 (CH), 126.8 (CH), 66.4 (CH<sub>2</sub>). HRMS (ESI) *m/z*: 302.1176 calcd for C<sub>20</sub>H<sub>16</sub>NO<sub>2</sub><sup>+</sup> [M – Br]<sup>+</sup>, found 302.1189.

**General procedure D for the synthesis of pyrido[2,1-*a*]pyrroloisoquinolines 6 and 17.**

The corresponding salt was dissolved in water (about 1 mg in 1 ml) and then aq 10% KOH (about 0.3 ml per 1 mg of salt) and DCM, in a volume sufficient to completely dissolve the product, were added. After stirring for 1 min the organic layer was separated. The water layer was twice extracted with DCM and the combined DCM solution was dried under Na<sub>2</sub>SO<sub>4</sub>, filtered and evaporated to dryness to give the product.

*3-Phenylpyrido[2,1-*a*]pyrrolo[3,4-*c*]isoquinoline (6a).* Compound **6a** (78 mg, 99%) was obtained from bromide (**3a**) (100 mg, 0.27 mmol) according to the general procedure D. Dark purple solid, mp 195–197 °C (DCM). <sup>1</sup>H NMR (400 MHz, DMSO-*d*<sub>6</sub>): δ 9.26 (dd, *J* = 6.8, 1.2 Hz, 1H), 9.17 (dd, *J* = 9.0, 1.5 Hz, 1H), 8.73 (d, *J* = 8.5 Hz, 1H), 8.25 (dd, *J* = 8.2, 1.2 Hz, 1H), 8.11 (ddd, *J* = 8.7, 7.2, 1.4 Hz, 1H), 7.94 (s, 1H), 7.82–7.73 (m, 2H), 7.63–7.58 (m, 2H), 7.49–7.42 (m, 3H), 7.38–7.30 (m, 1H). <sup>13</sup>C{1H} NMR (101 MHz, DMSO-*d*<sub>6</sub>): δ 139.2 (C), 137.9 (C), 134.8 (CH), 133.4 (CH), 132.9 (CH), 131.2 (C), 129.6 (CH), 128.5 (CH), 127.8 (C), 126.5 (CH), 126.1 (CH), 124.3 (CH), 123.7 (CH), 122.6 (CH), 122.2 (CH), 119.9 (CH), 118.8 (C), 117.6 (C), 114.9 (C). HRMS (ESI) *m/z*: 295.1230 calcd for C<sub>21</sub>H<sub>15</sub>N<sub>2</sub><sup>+</sup> [M + H]<sup>+</sup>, found 295.1235.

*3-(4-Chlorophenyl)pyrido[2,1-*a*]pyrrolo[3,4-*c*]isoquinoline (6c).* Compound **6c** (22 mg, 99%) was obtained from bromide (**3c**) (27 mg, 0.066 mmol) according to the general procedure D. Dark red solid, mp 207–209 °C (dec., DCM). <sup>1</sup>H NMR (400 MHz, DMSO-*d*<sub>6</sub>): δ 9.25–9.14 (m, 2H), 8.75 (d, *J* = 8.5 Hz, 1H), 8.26 (d, *J* = 8.1 Hz, 1H), 8.19–8.14 (m, 1H), 7.97 (s, 1H), 7.85–7.77 (m, 2H), 7.67–7.60 (m, 2H), 7.53–7.44 (m, 3H). <sup>13</sup>C{1H} NMR (101 MHz, DMSO-*d*<sub>6</sub>): δ 138.9 (C), 137.7 (C), 134.3 (CH), 133.6 (CH), 132.8 (CH), 131.3 (C), 131.0 (CH), 130.5 (C), 128.3 (CH), 127.4 (C), 126.0 (CH), 124.0 (CH), 123.6 (CH), 122.6 (CH), 122.1 (CH), 121.4 (CH), 118.6 (C), 117.9 (C), 115.3 (C). HRMS (ESI) *m/z*: 329.0840 calcd for C<sub>21</sub>H<sub>14</sub>ClN<sub>2</sub><sup>+</sup> [M + H]<sup>+</sup>, found 329.0850.

*3-(3-Methyl)pyrido[2,1-*a*]pyrrolo[3,4-*c*]isoquinoline (6e).* Compound **6e** (31 mg, 98%) was obtained from bromide (**3e**) (40 mg, 0.10 mmol) according to the general procedure D. Dark

purple solid, mp 89–90 °C (DCM). <sup>1</sup>H NMR (400 MHz, DMSO-*d*<sub>6</sub>): δ 9.28 (d, *J* = 6.8 Hz, 1H), 9.18 (d, *J* = 8.8 Hz, 1H), 8.74 (d, *J* = 8.4 Hz, 1H), 8.25 (d, *J* = 8.1 Hz, 1H), 8.16–8.09 (m, 1H), 7.94 (s, 1H), 7.83–7.75 (m, 2H), 7.51–7.43 (m, 3H), 7.29 (d, *J* = 7.5 Hz, 2H), 2.40 (s, 3H). <sup>13</sup>C{<sup>1</sup>H} NMR (101 MHz, DMSO-*d*<sub>6</sub>): δ 138.9 (C), 135.4 (C), 134.3 (CH), 133.1 (CH), 132.8 (CH), 131.3 (C), 129.5 (CH), 129.1 (CH), 128.3 (C), 126.0 (CH), 124.0 (CH), 123.6 (CH), 122.5 (CH), 122.1 (CH), 120.2 (CH), 118.6 (C), 117.5 (C), 114.8 (C), 20.9 (CH<sub>3</sub>). HRMS (ESI) *m/z*: 309.1386 calcd for C<sub>22</sub>H<sub>17</sub>N<sub>2</sub><sup>+</sup> [M + H]<sup>+</sup>, found 309.1377.

*3-(4-Methoxyphenyl)pyrido[2,1-*a*]pyrrolo[3,4-*c*]isoquinoline (6f)*. Compound **6f** (41 mg, 98%) was obtained from bromide (**3f**) (69 mg, 0.17 mmol) according to the general procedure D. Dark red solid, mp 150–151 °C (dec., DCM). <sup>1</sup>H NMR (400 MHz, DMSO-*d*<sub>6</sub>): δ 9.23 (dd, *J* = 18.4, 7.7 Hz, 2H), 8.76 (d, *J* = 8.4 Hz, 1H), 8.28 (d, *J* = 8.0 Hz, 1H), 8.25–8.17 (m, 1H), 7.99 (s, 1H), 7.88–7.78 (m, 2H), 7.53 (dd, *J* = 8.5, 6.4 Hz, 3H), 7.12–7.06 (m, 2H), 3.85 (s, 3H). <sup>13</sup>C{<sup>1</sup>H} NMR (101 MHz, DMSO-*d*<sub>6</sub>): δ 160.0 (C), 142.5 (C), 139.7 (CH), 134.7 (CH), 133.8 (CH), 131.6 (CH), 129.5 (C), 127.0 (CH), 126.6 (CH), 124.3 (CH), 124.1 (CH), 123.0 (CH), 122.5 (C), 121.5 (C), 120.7 (C), 117.2 (C), 114.9 (CH), 113.6 (C), 111.9 (CH), 55.4 (CH<sub>3</sub>). HRMS (ESI) *m/z*: 325.1335 calcd for C<sub>22</sub>H<sub>17</sub>N<sub>2</sub>O<sup>+</sup> [M + H]<sup>+</sup>, found 325.1349.

*3-(2-Methoxyphenyl)pyrido[2,1-*a*]pyrrolo[3,4-*c*]isoquinoline (6g)*. Compound **6g** (40 mg, 98%) was obtained from bromide (**3g**) (51 mg, 0.125 mmol) according to the general procedure D. Dark red solid, mp 176–177 °C (dec., DCM). <sup>1</sup>H NMR (400 MHz, DMSO-*d*<sub>6</sub>): δ 9.23 (d, *J* = 8.7 Hz, 1H), 8.80 (d, *J* = 8.5 Hz, 1H), 8.74 (dd, *J* = 6.8, 1.3 Hz, 1H), 8.34–8.25 (m, 2H), 8.10 (s, 1H), 7.90–7.83 (m, 2H), 7.66 (dd, *J* = 7.6, 1.9 Hz, 1H), 7.59–7.48 (m, 2H), 7.23–7.14 (m, 2H), 3.58 (s, 3H). <sup>13</sup>C{<sup>1</sup>H} NMR (101 MHz, DMSO-*d*<sub>6</sub>): δ 155.9 (C), 138.9 (C), 134.4 (CH), 134.3 (CH), 132.8 (CH), 132.0 (CH), 131.2 (C), 128.5 (CH), 126.1 (CH), 124.2 (CH), 123.8 (C), 122.8 (CH), 122.2 (CH), 121.8 (CH), 120.8 (CH), 119.8 (CH), 119.2 (C), 118.7 (C), 114.3 (C), 111.3 (C), 54.8 (CH<sub>3</sub>). HRMS (ESI) *m/z*: 325.1335 calcd for C<sub>22</sub>H<sub>17</sub>N<sub>2</sub>O<sup>+</sup> [M + H]<sup>+</sup>, found 325.1331.

*3-(3-Methoxyphenyl)pyrido[2,1-*a*]pyrrolo[3,4-*c*]isoquinoline (6h)*. Compound **6h** (57 mg, 99%) was obtained from bromide (**3h**) (72 mg, 0.18 mmol) according to the general procedure D. Dark brown solid, mp 153–155 °C (DCM). <sup>1</sup>H NMR (400 MHz, DMSO-*d*<sub>6</sub>): δ 9.30 (d, *J* = 6.7 Hz, 1H), 9.19 (d, *J* = 8.7 Hz, 1H), 8.76 (d, *J* = 8.5 Hz, 1H), 8.27 (d, *J* = 8.1 Hz, 1H), 8.19–8.12 (m, 1H), 7.96 (s, 1H), 7.84–7.77 (m, 2H), 7.48 (ddd, *J* = 8.4, 6.9, 1.3 Hz, 1H), 7.42–7.36 (m, 1H), 7.22–7.14 (m, 2H), 6.92 (dd, *J* = 8.2, 2.6 Hz, 1H), 3.80 (s, 3H). <sup>13</sup>C{<sup>1</sup>H} NMR (126 MHz, DMSO-*d*<sub>6</sub>): δ 159.3 (C), 139.8 (C), 139.0 (C), 134.4 (CH), 133.6 (CH), 132.8 (CH), 131.3 (C), 129.4 (CH), 128.3 (C), 126.0 (CH), 124.1 (CH), 123.6 (CH), 122.4 (CH), 122.2 (CH), 121.8

(CH), 120.4 (CH), 118.7 (C), 117.7 (C), 115.0 (C), 114.7 (CH), 112.3 (CH), 55.1 (CH<sub>3</sub>). HRMS (ESI) *m/z*: 325.1335 calcd for C<sub>22</sub>H<sub>17</sub>N<sub>2</sub>O<sup>+</sup> [M + H]<sup>+</sup>, found 325.1339.

*3-(2,4-Dimethoxyphenyl)pyrido[2,1-*a*]pyrrolo[3,4-*c*]isoquinoline (6i)*. Compound **6i** (46 mg, 99%) was obtained from bromide (**3i**) (59 mg, 0.13 mmol) according to the general procedure D. Dark brown solid, mp 202–205 °C (DCM). <sup>1</sup>H NMR (400 MHz, DMSO-*d*<sub>6</sub>): δ 9.15 (d, *J* = 8.7 Hz, 1H), 8.80–8.68 (m, 2H), 8.24 (d, *J* = 8.0 Hz, 1H), 8.21–8.13 (m, 1H), 7.97 (s, 1H), 7.84–7.76 (m, 2H), 7.58–7.51 (m, 1H), 7.51–7.44 (m, 1H), 6.76–6.70 (m, 2H), 3.87 (s, 3H), 3.56 (s, 3H). <sup>13</sup>C{<sup>1</sup>H} NMR (101 MHz, DMSO-*d*<sub>6</sub>): δ 160.4 (C), 157.1 (C), 139.3 (C), 134.8 (CH), 134.2 (CH), 132.9 (CH), 132.6 (CH), 131.1 (C), 126.1 (CH), 124.5 (CH), 123.0, 122.9 (CH), 122.23 (CH), 122.17 (CH), 118.9 (C), 118.7 (C), 118.3 (CH), 118.1 (C), 114.0 (C), 105.6 (CH), 98.7 (CH), 55.3 (CH<sub>3</sub>), 55.0 (CH<sub>3</sub>). HRMS (ESI) *m/z*: 355.1441 calcd for C<sub>23</sub>H<sub>19</sub>N<sub>2</sub>O<sub>2</sub><sup>+</sup> [M + H]<sup>+</sup>, found 355.1448.

*4-(Pyrido[2,1-*a*]pyrrolo[3,4-*c*]isoquinolin-3-yl)benzonitrile (6l)*. Compound **6l** (37 mg, 99%) was obtained from bromide (**3l**) (46 mg, 0.115 mmol) according to the general procedure D. Dark red solid, mp 225–227 °C (DCM). <sup>1</sup>H NMR (400 MHz, DMSO-*d*<sub>6</sub>): δ 9.23 (d, *J* = 8.7 Hz, 1H), 9.17 (d, *J* = 6.8 Hz, 1H), 8.79 (d, *J* = 8.5 Hz, 1H), 8.29 (d, *J* = 8.0 Hz, 1H), 8.21 (ddd, *J* = 8.7, 7.2, 1.4 Hz, 1H), 8.03 (s, 1H), 7.87–7.79 (m, 6H), 7.51 (ddd, *J* = 8.3, 6.9, 1.3 Hz, 1H). <sup>13</sup>C{<sup>1</sup>H} NMR (101 MHz, DMSO-*d*<sub>6</sub>): δ 143.4 (C), 139.2 (C), 134.8 (CH), 134.4 (CH), 132.9 (CH), 132.2 (CH), 131.1 (C), 129.2 (CH), 127.2 (C), 126.0 (CH), 124.3 (CH), 123.7 (CH), 123.1 (CH), 122.6 (CH), 122.2 (CH), 119.5 (C), 119.0 (C), 118.9 (C), 116.4 (C), 107.2 (C). HRMS (ESI) *m/z*: 320.1182 calcd for C<sub>22</sub>H<sub>14</sub>N<sub>3</sub><sup>+</sup> [M + H]<sup>+</sup>, found 320.1186.

*3-(Pyridin-2-yl)pyrido[2,1-*a*]pyrrolo[3,4-*c*]isoquinoline (6m)*. Compound **6m** (59 mg, 99%) was obtained from iodide (**3m**) (85 mg, 0.20 mmol) according to the general procedure D. Dark purple solid, mp 92–93 °C (DCM). <sup>1</sup>H NMR (400 MHz, DMSO-*d*<sub>6</sub>): δ 11.57 (d, *J* = 6.7 Hz, 1H), 9.18 (dd, *J* = 8.8, 1.5 Hz, 1H), 8.73 (d, *J* = 8.4 Hz, 1H), 8.57 (dd, *J* = 5.0, 1.8 Hz, 1H), 8.32–8.18 (m, 3H), 8.06 (s, 1H), 7.95–7.90 (m, 1H), 7.83–7.76 (m, 2H), 7.48 (ddd, *J* = 8.3, 6.9, 1.3 Hz, 1H), 7.19 (ddd, *J* = 7.3, 4.9, 1.2 Hz, 1H). <sup>13</sup>C{<sup>1</sup>H} NMR (101 MHz, DMSO-*d*<sub>6</sub>): δ 156.8 (C), 147.2 (CH), 139.5 (C), 138.6 (CH), 136.4 (CH), 135.0 (CH), 132.8 (CH), 131.0 (C), 127.9 (C), 125.9 (CH), 124.5 (CH), 123.5 (CH), 123.0 (CH), 122.7 (C), 122.21 (CH), 122.1 (CH), 120.9 (C), 119.8 (CH), 118.9 (C), 116.7 (C). HRMS (ESI) *m/z*: 296.1182 calcd for C<sub>20</sub>H<sub>14</sub>N<sub>3</sub><sup>+</sup> [M + H]<sup>+</sup>, found 296.1193.

*7-Methyl-3-phenylpyrido[2,1-a]pyrrolo[3,4-c]isoquinoline (6n)*. Compound **6n** (54.5 mg, 99%) was obtained from bromide (**3n**) (69 mg, 0.18 mmol) according to the general procedure D. Dark brown solid, mp > 400 °C (DCM). <sup>1</sup>H NMR (400 MHz, DMSO-*d*<sub>6</sub>): δ 9.11–9.05 (m, 2H), 8.76 (d, *J* = 8.4 Hz, 1H), 8.25 (dd, *J* = 8.2, 1.2 Hz, 1H), 7.95 (s, 1H), 7.83–7.77 (m, 1H), 7.68 (dd, *J* = 7.0, 1.9 Hz, 1H), 7.62–7.58 (m, 2H), 7.51–7.45 (m, 3H), 7.39–7.34 (m, 1H), 2.63 (s, 3H). <sup>13</sup>C{<sup>1</sup>H} NMR (126 MHz, DMSO-*d*<sub>6</sub>): δ 147.5 (C), 139.2 (C), 137.5 (C), 132.7 (CH), 131.2 (C), 129.5 (CH), 128.5 (CH), 127.0 (C), 126.6 (CH), 126.1 (CH), 124.2 (CH), 123.9 (CH), 123.1 (CH), 122.2 (CH), 119.4 (CH), 118.6 (C), 117.3 (C), 114.5 (C), 21.0 (CH<sub>3</sub>). HRMS (ESI) *m/z*: 309.1386 calcd for C<sub>22</sub>H<sub>17</sub>N<sub>2</sub><sup>+</sup> [M + H]<sup>+</sup>, found 309.1400.

*7-Methoxy-3-phenylpyrido[2,1-a]pyrrolo[3,4-c]isoquinoline (6o)*. Compound **6o** (45 mg, 99%) was obtained from bromide (**3o**) (57 mg, 0.14 mmol) according to the general procedure D. Dark orange solid, mp 149–151 °C (dec., DCM). <sup>1</sup>H NMR (400 MHz, DMSO-*d*<sub>6</sub>): δ 9.07 (d, *J* = 7.6 Hz, 1H), 8.77 (d, *J* = 8.4 Hz, 1H), 8.46 (d, *J* = 3.0 Hz, 1H), 8.18 (dd, *J* = 8.1, 1.2 Hz, 1H), 7.86 (s, 1H), 7.76 (ddd, *J* = 8.0, 6.9, 1.0 Hz, 1H), 7.59–7.52 (m, 3H), 7.48–7.39 (m, 3H), 7.36–7.31 (m, 1H), 4.15 (s, 3H). <sup>13</sup>C{<sup>1</sup>H} NMR (101 MHz, DMSO-*d*<sub>6</sub>): δ 163.3 (C), 142.0 (C), 138.5 (C), 135.2 (CH), 132.8 (CH), 131.6 (C), 129.5 (CH), 128.4 (CH), 127.0 (C), 126.4 (CH), 126.0 (CH), 123.5 (CH), 122.0 (CH), 120.5 (CH), 118.2 (C), 117.0 (C), 113.8 (C), 112.2 (CH), 105.3 (CH), 57.2 (CH<sub>3</sub>). HRMS (ESI) *m/z*: 325.1335 calcd for C<sub>22</sub>H<sub>17</sub>N<sub>2</sub>O<sup>+</sup> [M + H]<sup>+</sup>, found 325.1333.

*N,N-Dimethyl-3-phenylpyrido[2,1-a]pyrrolo[3,4-c]isoquinolin-7-amine (6p)*. Compound **6p** (127 mg, 99%) was obtained from bromide (**3p**) (159 mg, 0.38 mmol) according to the general procedure D. Orange solid, mp 199–200 °C (DCM). <sup>1</sup>H NMR (400 MHz, DMSO-*d*<sub>6</sub>): δ 8.69–8.61 (m, 2H), 8.09 (d, *J* = 7.9 Hz, 1H), 7.82–7.76 (m, 2H), 7.72–7.66 (m, 1H), 7.56 (d, *J* = 7.5 Hz, 2H), 7.50–7.45 (m, 2H), 7.41–7.34 (m, 2H), 7.22 (dd, *J* = 7.8, 3.0 Hz, 1H), 3.27 (s, 6H). <sup>13</sup>C{<sup>1</sup>H} NMR (101 MHz, DMSO-*d*<sub>6</sub>): δ 153.0 (C), 141.7 (C), 134.0 (CH), 132.4 (CH), 130.0 (C), 129.9 (C), 128.9 (CH), 128.1 (CH), 127.8 (CH), 127.4 (CH), 126.2 (CH), 125.3 (CH), 122.5 (CH), 121.2 (C), 120.2 (C), 116.9 (C), 112.1 (C), 107.6 (CH), 100.9 (CH), 39.5 (CH<sub>3</sub>). HRMS (ESI) *m/z*: 338.1652 calcd for C<sub>23</sub>H<sub>20</sub>N<sub>3</sub><sup>+</sup> [M + H]<sup>+</sup>, found 338.1656.

*3,7-Diphenylpyrido[2,1-a]pyrrolo[3,4-c]isoquinoline (6q)*. Compound **6q** (49 mg, 99%) was obtained from bromide (**3q**) (60 mg, 0.135 mmol) according to the general procedure D. Dark brown solid, mp 195–198 °C (DCM). <sup>1</sup>H NMR (400 MHz, DMSO-*d*<sub>6</sub>): δ 9.32 (d, *J* = 2.2 Hz, 1H), 9.21 (d, *J* = 7.2 Hz, 1H), 9.02 (d, *J* = 8.5 Hz, 1H), 8.27–8.14 (m, 4H), 7.97 (s, 1H), 7.84–7.78 (m, 1H), 7.66–7.46 (m, 8H), 7.43–7.38 (m, 1H). <sup>13</sup>C{<sup>1</sup>H} NMR (101 MHz, DMSO-*d*<sub>6</sub>): δ 144.7 (C), 139.5 (C), 137.8 (C), 134.7 (C), 133.4 (CH), 132.9 (CH), 131.2 (C), 130.6 (CH),

129.6 (CH), 129.3 (CH), 128.6 (CH), 127.7 (C), 127.6 (CH), 126.7 (CH), 126.6 (CH), 124.3 (CH), 122.1 (CH), 120.0 (CH), 119.8 (CH), 119.5 (CH), 119.1 (C), 117.4 (C), 114.8 (C). HRMS (ESI)  $m/z$ : 371.1543 calcd for  $C_{27}H_{19}N_2^+$   $[M + H]^+$ , found 371.1531.

*7-(4-Methoxyphenyl)-3-phenylpyrido[2,1-*a*]pyrrolo[3,4-*c*]isoquinoline (6r)*. Compound **6r** (31.5 mg, 99%) was obtained from bromide (**3r**) (38 mg, 0.079 mmol) according to the general procedure D. Dark brown solid, mp 149–151 °C (DCM).  $^1H$  NMR (400 MHz, DMSO- $d_6$ ):  $\delta$  9.25 (d,  $J$  = 2.3 Hz, 1H), 9.11 (d,  $J$  = 7.2 Hz, 1H), 9.03 (d,  $J$  = 8.5 Hz, 1H), 8.27–8.16 (m, 4H), 7.99 (s, 1H), 7.84–7.78 (m, 1H), 7.69–7.62 (m, 2H), 7.56–7.48 (m, 3H), 7.46–7.41 (m, 1H), 7.16–7.11 (m, 2H), 3.87 (s, 3H).  $^{13}C\{^1H\}$  NMR (101 MHz, DMSO- $d_6$ ):  $\delta$  161.6 (C), 145.2 (C), 140.1 (C), 136.6 (C), 133.6 (CH), 132.9 (CH), 130.9 (C), 129.7 (CH), 129.3 (CH), 128.7 (CH), 127.0 (CH), 126.8 (CH), 126.6 (C), 126.3 (C), 124.6 (CH), 122.2 (CH), 119.5 (C), 119.4 (CH), 118.5 (CH), 118.1 (CH), 117.4 (C), 114.8 (CH), 114.4 (C), 55.5 (CH<sub>3</sub>). HRMS (ESI)  $m/z$ : 401.1648 calcd for  $C_{28}H_{21}N_2O^+$   $[M + H]^+$ , found 401.1644.

*6,8-Dimethyl-3-phenylpyrido[2,1-*a*]pyrrolo[3,4-*c*]isoquinoline (6s)*. Compound **6s** (32 mg, 99%) was obtained from bromide (**3s**) (40 mg, 0.1 mmol) according to the general procedure D. Brown solid, mp 208 °C (DCM).  $^1H$  NMR (400 MHz, DMSO- $d_6$ ):  $\delta$  9.04 (s, 1H), 8.61 (d,  $J$  = 8.6 Hz, 1H), 8.27 (d,  $J$  = 8.0 Hz, 1H), 8.05 (s, 1H), 7.93 (s, 1H), 7.81–7.75 (m, 1H), 7.64–7.58 (m, 2H), 7.51–7.36 (m, 4H), 3.06 (s, 3H), 2.23 (s, 3H).  $^{13}C\{^1H\}$  NMR (101 MHz, DMSO- $d_6$ ):  $\delta$  142.33 (CH), 142.31 (CH), 139.1 (C), 135.9 (C), 132.3 (CH), 132.2 (CH), 131.6 (C), 131.2 (C), 129.7 (CH), 129.6 (CH), 128.7 (CH), 127.6 (CH), 124.0 (CH), 122.4 (CH), 120.3 (C), 118.0 (C), 116.5 (C), 114.7 (C), 25.7 (CH<sub>3</sub>), 17.3 (CH<sub>3</sub>). HRMS (ESI)  $m/z$ : 323.1543 calcd for  $C_{23}H_{19}N_2^+$   $[M + H]^+$ , found 323.1547.

*1-(4-(2-Bromophenyl)-5-(tert-butoxycarbonyl)-2-phenyl-1H-pyrrol-3-yl)pyridin-1-ium bromide (7)*. Compound **7** (366 mg, 73%) was obtained from 1-(2-oxo-2-phenylethyl)pyridin-1-ium bromide (**5a**) (249 mg, 0.903 mmol, 1 equiv), triethylamine (136 mg, 1.35 mmol, 1.5 equiv) and *tert*-butyl 3-(2-bromophenyl)-2*H*-azirine-2-carboxylate (**4b**) (400 mg, 1.35 mmol, 1.5 equiv) in 10 mL of DCM according to the general procedure A. Colorless solid, mp 260–261 °C (dec., DCM).  $^1H$  NMR (400 MHz, DMSO- $d_6$ ):  $\delta$  13.23 (br. s, 1H), 9.02 (d,  $J$  = 5.9 Hz, 2H), 8.72–8.65 (m, 1H), 8.17 (t,  $J$  = 7.2 Hz, 2H), 7.63 (dd,  $J$  = 8.0, 1.2 Hz, 1H), 7.46 (dd,  $J$  = 7.6, 1.8 Hz, 1H), 7.42–7.23 (m, 7H), 1.21 (s, 9H).  $^{13}C\{^1H\}$  NMR (101 MHz, DMSO- $d_6$ ):  $\delta$  159.1 (C), 147.9 (CH), 147.2 (CH), 132.1 (CH), 132.04 (CH), 131.98 (C), 130.4 (C), 130.2 (CH), 129.2 (CH), 129.0 (CH), 128.6 (CH), 127.8 (CH), 127.4 (C), 127.1 (C), 124.6 (C), 124.17 (C), 124.14 (C), 120.6



(C), 80.8 (C), 27.4 (CH<sub>3</sub>). HRMS (ESI) m/z: 475.1016 calcd for C<sub>26</sub>H<sub>24</sub><sup>79</sup>BrN<sub>2</sub>O<sub>2</sub><sup>+</sup> [M – Br]<sup>+</sup>, found 475.1034.

*1-(Tert-butoxycarbonyl)-3-phenylpyrido[2,1-a]pyrrolo[3,4-c]isoquinolin-2-ium bromide (8)*. Compound **8** (64 mg, 50%) was obtained from 1-(4-(2-bromophenyl)-5-(tert-butoxycarbonyl)-2-phenyl-1*H*-pyrrol-3-yl)pyridin-1-ium bromide (**7**) (150 mg, 0.271 mmol, 1 equiv), TTMSS (101 mg, 0.406 mmol, 1.5 equiv) and AIBN (89 mg, 0.54 mmol, 2 equiv) according to the general procedure C. Pale orange solid, mp > 400 °C (MeCN/EtOAc). <sup>1</sup>H NMR (400 MHz, DMSO-*d*<sub>6</sub>): δ 13.61 (s, 1H), 9.70 (d, *J* = 8.3 Hz, 1H), 9.47 (d, *J* = 8.8 Hz, 1H), 9.06 (d, *J* = 8.4 Hz, 1H), 8.97 (d, *J* = 6.8 Hz, 1H), 8.60–8.52 (m, 1H), 8.16–8.07 (m, 1H), 8.01–7.88 (m, 2H), 7.80–7.68 (m, 5H), 1.67 (s, 9H). <sup>13</sup>C{<sup>1</sup>H} NMR (101 MHz, DMSO-*d*<sub>6</sub>): δ 159.7 (C), 142.8 (C), 140.6 (CH), 134.9 (CH), 133.8 (CH), 130.6 (CH), 130.5 (CH), 129.8 (C), 129.6 (CH), 128.8 (CH), 127.9 (C), 126.9 (CH), 125.5 (C), 124.3 (CH), 124.1 (CH), 122.8 (C), 119.6 (C), 116.4 (C), 116.0 (C), 82.9 (C), 28.0 (CH<sub>3</sub>). HRMS (ESI) m/z: 395.1755 calcd for C<sub>26</sub>H<sub>23</sub>N<sub>2</sub>O<sub>2</sub><sup>+</sup> [M – Br]<sup>+</sup>, found 395.1750.

*1-(2-(2-Bromophenyl)-4-(2-iodophenyl)-1*H*-pyrrol-3-yl)pyridin-1-ium bromide (9)*. Compound **9** (240 mg, 49%) was obtained from 1-(2-(2-bromophenyl)-2-oxoethyl)pyridin-1-ium bromide (**15a**) (300 mg, 0.84 mmol, 1 equiv), triethylamine (106 mg, 1.05 mmol, 1.5 equiv) and 3-(2-iodophenyl)-2*H*-azirine (250 mg, 1.05 mmol, 1.5 equiv) in DCM (5 mL) according to the general procedure A. Isolated using column chromatography. Beige solid, mp 340 °C (DCM/MeOH). <sup>1</sup>H NMR (400 MHz, DMSO-*d*<sub>6</sub>): δ 12.45–12.39 (m, 1H), 8.65–8.55 (m, 3H), 8.09 (t, *J* = 7.1 Hz, 2H), 7.88 (d, *J* = 7.9 Hz, 1H), 7.71 (dd, *J* = 8.1, 1.2 Hz, 1H), 7.62 (dd, *J* = 7.6, 1.8 Hz, 1H), 7.56–7.51 (m, 1H), 7.48–7.37 (m, 3H), 7.34 (d, *J* = 3.1 Hz, 1H), 7.13–7.09 (m, 1H). <sup>13</sup>C{<sup>1</sup>H} NMR (101 MHz, DMSO-*d*<sub>6</sub>): δ 146.4 (CH), 146.1 (CH), 139.1 (CH), 136.1 (C), 133.3 (CH), 133.1 (CH), 132.1 (C), 131.5 (CH), 130.0 (CH), 129.3 (C), 128.7 (CH), 128.6 (CH), 128.4 (CH), 125.2 (C), 123.8 (C), 123.3 (C), 121.1 (C), 119.2 (CH), 101.4 (C). HRMS (ESI) m/z: 500.9458 calcd for C<sub>21</sub>H<sub>16</sub><sup>79</sup>BrIN<sub>2</sub><sup>+</sup> [M – Br]<sup>+</sup>, found 500.9454.

*3-(2-Bromophenyl)pyrido[2,1-a]pyrrolo[3,4-c]isoquinolin-2-ium bromide (10)*. Compound **10** (36 mg, 58%) was obtained from 1-(2-(2-bromophenyl)-4-(2-iodophenyl)-1*H*-pyrrol-3-yl)pyridin-1-ium bromide (**9**) (80 mg, 0.14 mmol, 1 equiv), TTMSS (51 mg, 0.21 mmol, 1.5 equiv) and AIBN (45 mg, 0.28 mmol, 2 equiv) according to the general procedure C. Orange solid, mp > 400 °C (MeCN/EtOAc). <sup>1</sup>H NMR (400 MHz, DMSO-*d*<sub>6</sub>): δ 13.14 (s, 1H), 9.39 (d, *J* = 8.7 Hz, 1H), 9.13 (d, *J* = 6.6 Hz, 1H), 8.92 (d, *J* = 8.4 Hz, 1H), 8.56–8.43 (m, 2H), 8.34 (d, *J* = 3.2 Hz, 1H), 8.02–7.95 (m, 2H), 7.77–7.62 (m, 6H). <sup>13</sup>C{<sup>1</sup>H} NMR (101 MHz, DMSO-*d*<sub>6</sub>): δ 142.8 (C), 140.0 (CH), 135.0 (CH), 133.9 (CH), 130.7 (C), 130.2 (CH), 129.58 (CH), 129.47

(CH), 127.2 (CH), 126.7 (CH), 124.4 (CH), 124.1 (CH), 123.1 (CH), 121.7 (C), 121.0 (C), 117.5 (C), 113.9 (C), 112.5 (CH). HRMS (ESI)  $m/z$ : 375.0314 calcd for  $C_{21}H_{14}^{81}BrN_2^+ [M - Br]^+$ , found 375.0333.

*3-(2-Bromophenyl)pyrido[2,1-*a*]pyrrolo[3,4-*c*]isoquinoline (11)*. Compound **11** (28 mg, 99%) was obtained from 3-(2-bromophenyl)pyrido[2,1-*a*]pyrrolo[3,4-*c*]isoquinolin-4-ium bromide (**10**) (35 mg, 0.077 mmol) according to the general procedure D. Dark purple solid, mp 298–300 °C (DCM).  $^1H$  NMR (400 MHz, DMSO-*d*<sub>6</sub>):  $\delta$  9.27–9.22 (m, 2H), 8.80 (d,  $J$  = 8.5 Hz, 1H), 8.32 (d,  $J$  = 8.6 Hz, 1H), 8.27–8.20 (m, 1H), 8.06 (s, 1H), 8.02–7.94 (m, 2H), 7.68–7.62 (m, 2H), 7.57–7.51 (m, 3H), 7.47–7.41 (m, 1H).  $^{13}C\{^1H\}$  NMR (101 MHz, DMSO-*d*<sub>6</sub>):  $\delta$  139.7 (C), 136.9 (C), 135.5 (CH), 133.6 (CH), 133.13 (C), 133.06 (CH), 131.0 (C), 129.7 (CH), 129.6 (CH), 128.6 (CH), 127.0 (CH), 126.2 (CH), 124.7 (CH), 123.8 (CH), 122.8 (CH), 122.4 (CH), 119.1 (C), 118.9 (C), 117.6 (C), 114.7 (C). HRMS (ESI)  $m/z$ : 373.0335 calcd for  $C_{21}H_{14}^{79}BrN_2^+ [M + H]^+$ , found 373.0349.

*1-(2,4-Bis(2-bromophenyl)-1H-pyrrol-3-yl)pyridin-1-ium bromide (12)*. Compound **12** (301 mg, 67%) was obtained from 1-(2-(2-bromophenyl)-2-oxoethyl)-pyridin-1-ium bromide (**15a**) (300 mg, 0.84 mmol, 1 equiv), triethylamine (127 mg, 1.26 mmol, 1.5 equiv) and 3-(2-bromophenyl)-2H-azirine (**4a**) (247 mg, 1.26 mmol, 1.5 equiv) in DCM (6 mL) according to the general procedure A. Isolated using column chromatography. Slightly-yellow solid, mp 341–342 °C (DCM/MeOH).  $^1H$  NMR (400 MHz, DMSO-*d*<sub>6</sub>):  $\delta$  12.47 (s, 1H), 8.70–8.55 (m, 3H), 8.08 (t,  $J$  = 7.0 Hz, 2H), 7.69 (d,  $J$  = 8.0 Hz, 1H), 7.67–7.58 (m, 2H), 7.58–7.37 (m, 5H), 7.33–7.29 (m, 1H).  $^{13}C\{^1H\}$  NMR (101 MHz, DMSO-*d*<sub>6</sub>):  $\delta$  146.4 (CH), 146.1 (CH), 133.4 (CH), 133.1 (CH), 133.0 (CH), 132.8 (CH), 131.9 (C), 131.5 (CH), 130.0 (CH), 129.2 (C), 128.6 (CH), 128.4 (CH), 128.3 (CH), 125.4 (C), 124.1 (C), 123.5 (C), 123.3 (C), 119.5 (CH), 117.8 (C). HRMS (ESI)  $m/z$ : 454.9577 calcd for  $C_{21}H_{16}^{79}Br^{81}BrN_2^+ [M - Br]^+$ , found 454.9573.

*Dibenzo[*b,g*]pyrido[2,1,6-*de*]pyrrolo[2,3,4-*ij*]quinolizin-1-ium bromide (13)*. Compound **13** (52 mg, 74%) was obtained from 1-(2,4-bis(2-bromophenyl)-1H-pyrrol-3-yl)pyridin-1-ium bromide (**12**) (100 mg, 0.19 mmol, 1 equiv), TTMSS (140 mg, 0.56 mmol, 4 equiv) and AIBN (184 mg, 1.12 mmol, 6 equiv) according to the general procedure C. Orange solid, mp > 400 °C (MeCN/EtOAc).  $^1H$  NMR (500 MHz, DMSO-*d*<sub>6</sub>):  $\delta$  13.87 (s, 1H), 9.34 (d,  $J$  = 8.5 Hz, 1H), 9.19 (d,  $J$  = 8.3 Hz, 1H), 9.03 (d,  $J$  = 8.5 Hz, 1H), 8.79 (d,  $J$  = 8.3 Hz, 1H), 8.60–8.53 (m, 1H), 8.49 (d,  $J$  = 2.7 Hz, 1H), 8.44 (d,  $J$  = 7.8 Hz, 1H), 8.24 (d,  $J$  = 7.7 Hz, 1H), 8.08–8.03 (m, 1H), 7.90–7.85 (m, 1H), 7.83–7.78 (m, 1H), 7.69–7.63 (m, 1H).  $^{13}C\{^1H\}$  NMR (101 MHz, DMSO-*d*<sub>6</sub>):  $\delta$  140.0 (C), 139.3 (C), 135.6 (C), 133.7 (CH), 133.4 (CH), 128.4 (C), 127.8 (CH), 127.6 (CH),

127.2 (CH), 127.0 (CH), 124.6 (C), 123.6 (CH), 123.3 (C), 122.5 (C), 121.5 (C), 120.8 (CH), 120.4 (CH), 119.8 (C), 119.4 (CH), 115.5 (CH), 110.3 (C). HRMS (ESI)  $m/z$ : 293.1073 calcd for  $C_{21}H_{13}N_2^+ [M - Br]^+$ , found 293.1080.

*Dibenzo[b,g]pyrido[2,1,6-de]pyrrolo[2,3,4-ij]quinoline (14)*. Compound **14** (41 mg, 99%) was obtained from dibenzo[b,g]pyrido[2,1,6-de]pyrrolo[2,3,4-ij]quinolizin-1-ium bromide (**13**) (53 mg, 0.14 mmol) according to the general procedure D. Dark brown solid, mp 155–157 °C (dec., DCM).  $^1H$  NMR (400 MHz, DMSO- $d_6$ ):  $\delta$  9.03 (d,  $J$  = 8.6 Hz, 1H), 8.86 (d,  $J$  = 8.2 Hz, 1H), 8.79 (d,  $J$  = 8.5 Hz, 1H), 8.62 (d,  $J$  = 8.3 Hz, 1H), 8.44 (dd,  $J$  = 8.1, 1.3 Hz, 1H), 8.32 (s, 1H), 8.20–8.10 (m, 2H), 7.86–7.80 (m, 1H), 7.74–7.68 (m, 1H), 7.51 (ddd,  $J$  = 8.4, 6.9, 1.4 Hz, 1H), 7.43–7.37 (m, 1H).  $^{13}C\{^1H\}$  NMR (101 MHz, DMSO- $d_6$ ):  $\delta$  138.3 (C), 137.4 (C), 132.6 (CH), 132.3 (CH), 131.2 (C), 131.0 (CH), 130.4 (C), 127.0 (C), 126.5 (CH), 126.4 (CH), 125.5 (CH), 124.9 (CH), 124.5 (CH), 124.1 (C), 122.5 (CH), 121.5 (C), 120.5 (C), 120.3 (CH), 118.5 (CH), 116.9 (CH), 109.4 (C). HRMS (ESI)  $m/z$ : 292.9996 calcd for  $C_{21}H_{13}N_2^+ [M + H]^+$ , found 292.9992.

*1-(2-(2-Bromophenyl)-2-oxoethyl)-4-methylpyridin-1-ium bromide (15b)*. Compound **15b** (1.18 g, 76%) was obtained from 4-methylpyridine (390 mg, 4.19 mmol, 1 equiv) and 2-bromo-1-(2-bromophenyl)ethan-1-one (1.167 g, 4.19 mmol, 1 equiv) in diethyl ether (18 mL). Bright yellow solid, mp 226–227 °C (Et<sub>2</sub>O).  $^1H$  NMR (400 MHz, DMSO- $d_6$ ):  $\delta$  8.93 (d,  $J$  = 6.5 Hz, 2H), 8.16–8.12 (m, 3H), 7.86 (d,  $J$  = 7.8 Hz, 1H), 7.67 (td,  $J$  = 10.7, 4.1 Hz, 1H), 7.61 (td,  $J$  = 7.8, 1.6 Hz, 1H), 6.45 (s, 2H), 2.68 (s, 3H).  $^{13}C\{^1H\}$  NMR (101 MHz, DMSO- $d_6$ ):  $\delta$  192.0 (C), 160.1 (C), 145.0 (CH), 134.76 (CH), 134.61 (C), 134.28 (CH), 131.0 (CH), 128.19 (CH), 128.04 (CH), 119.8 (C), 66.6 (CH<sub>2</sub>), 21.7 (CH<sub>3</sub>). HRMS (ESI)  $m/z$ : 290.0175 calcd for  $C_{14}H_{13}^{79}BrNO^+ [M - Br]^+$ , found 290.0167.

*1-(2-(2-Bromophenyl)-2-oxoethyl)-4-(4-methoxyphenyl)pyridin-1-ium bromide (15e)*. Compound **15e** (592 mg, 79%) was obtained from 4-(4-methoxyphenyl)pyridine (300 mg, 1.62 mmol, 1 equiv) and 2-bromo-1-(2-bromophenyl)ethan-1-one (451 mg, 1.62 mmol, 1 equiv) in acetone (10 mL). White solid, mp 240–241 °C (acetone).  $^1H$  NMR (400 MHz, DMSO- $d_6$ ):  $\delta$  8.98 (d,  $J$  = 7.0 Hz, 2H), 8.62 (d,  $J$  = 7.0 Hz, 2H), 8.21–8.13 (m, 3H), 7.87 (dd,  $J$  = 7.9, 1.0 Hz, 1H), 7.68 (td,  $J$  = 7.5, 1.1 Hz, 1H), 7.62 (td,  $J$  = 7.7, 1.7 Hz, 1H), 7.22 (d,  $J$  = 8.9 Hz, 2H), 6.41 (s, 2H), 3.90 (s, 3H).  $^{13}C\{^1H\}$  NMR (101 MHz, DMSO- $d_6$ ):  $\delta$  192.0 (C), 163.0 (C), 154.8 (C), 145.7 (CH), 134.83 (CH), 134.57 (C), 134.32 (CH), 131.1 (CH), 130.2 (CH), 128.1 (CH), 125.3 (C), 122.9 (CH), 119.9 (C), 115.3 (CH), 66.2 (CH<sub>2</sub>), 55.7 (CH<sub>3</sub>). HRMS (ESI)  $m/z$ : 382.0437 calcd for  $C_{20}H_{17}^{79}BrNO_2^+ [M - Br]^+$ , found 382.0443.

*2-(2-(2-Bromophenyl)-2-oxoethyl)isoquinolin-2-ium bromide (15g)*. Compound **15g** (453 mg, 90%) was obtained from isoquinoline (159 mg, 1.23 mmol, 1 equiv) and 2-bromo-1-(2-bromophenyl)ethan-1-one (342 mg, 1.23 mmol, 1 equiv) in acetone (5 mL). Beige solid, mp 216–218 °C (acetone). <sup>1</sup>H NMR (400 MHz, DMSO-*d*<sub>6</sub>): δ 10.12 (s, 1H), 8.79 (dd, *J* = 6.9, 1.4 Hz, 1H), 8.72 (d, *J* = 6.8 Hz, 1H), 8.59 (d, *J* = 8.3 Hz, 1H), 8.44 (d, *J* = 8.2 Hz, 1H), 8.34 (ddd, *J* = 8.3, 6.8, 1.2 Hz, 1H), 8.20 (dd, *J* = 7.7, 1.8 Hz, 1H), 8.13 (ddd, *J* = 8.2, 6.9, 1.1 Hz, 1H), 7.88 (dd, *J* = 7.9, 1.2 Hz, 1H), 7.74–7.59 (m, 2H), 6.62 (s, 2H). <sup>13</sup>C NMR (101 MHz, DMSO-*d*<sub>6</sub>): δ 192.0 (C), 151.6 (CH), 137.6 (CH), 137.3 (C), 136.2 (CH), 134.8 (CH), 134.6 (C), 134.4 (CH), 131.4 (CH), 131.1 (CH), 130.6 (CH), 128.1 (CH), 127.4 (CH), 126.8 (C), 125.6 (CH), 119.8 (C), 67.2 (CH<sub>2</sub>). HRMS (ESI) *m/z*: 326.0175 calcd for C<sub>17</sub>H<sub>13</sub><sup>79</sup>BrNO<sup>+</sup> [M – Br]<sup>+</sup>, found 326.0170.

*4-Benzoyl-1-(2-(2-bromophenyl)-2-oxoethyl)pyridin-1-ium bromide (15j)*. Compound **15j** (613 mg, 61%) was obtained from phenyl(pyridin-4-yl)methanone (400 mg, 2.19 mmol, 1 equiv) and 2-bromo-1-(2-bromophenyl)ethan-1-one (607 mg, 2.19 mmol, 1 equiv) in acetone (10 mL). Pale yellow solid, mp 223 °C (acetone). <sup>1</sup>H NMR (400 MHz, DMSO-*d*<sub>6</sub>): δ 9.30 (d, *J* = 6.6 Hz, 2H), 8.53 (d, *J* = 6.6 Hz, 2H), 8.21 (dd, *J* = 7.7, 1.5 Hz, 1H), 7.94–7.86 (m, 3H), 7.83 (t, *J* = 7.4 Hz, 1H), 7.73–7.60 (m, 4H), 6.63 (s, 2H). <sup>13</sup>C NMR (101 MHz, DMSO-*d*<sub>6</sub>): δ 191.9 (C), 191.2 (C), 152.2 (C), 147.2 (CH), 134.9 (CH), 134.8 (CH), 134.5 (CH), 134.2 (C), 134.1 C, 131.3 (CH), 130.3 (CH), 129.1 (CH), 128.1 (CH), 126.9 (CH), 120.1 (C), 67.5 (CH<sub>2</sub>). HRMS (ESI) *m/z*: 380.0281 calcd for C<sub>20</sub>H<sub>15</sub><sup>79</sup>BrNO<sub>2</sub><sup>+</sup> [M – Br]<sup>+</sup>, found 380.0296.

*1-(2-(2-Bromophenyl)-4-phenyl-1H-pyrrol-3-yl)-4-methylpyridin-1-ium bromide (16b)*. Compound **16b** (319 mg, 64%) was obtained from 1-(2-(2-bromophenyl)-2-oxoethyl)-4-methylpyridin-1-ium bromide (**15b**) (395 mg, 1.06 mmol, 1 equiv), triethylamine (161 mg, 1.60 mmol, 1.5 equiv) and 3-phenyl-2*H*-azirine (**4c**) (187 mg, 1.60 mmol, 1.5 equiv) in DCM (5 mL) according to the general procedure A. The product was isolated by column chromatography on silica gel (DCM/MeOH from v/v 20:1 to 10:1). Dark red solid, mp 240 °C (dec., DCM/MeOH). <sup>1</sup>H NMR (400 MHz, DMSO-*d*<sub>6</sub>): δ 12.38–12.23 (m, 1H), 8.79–8.71 (m, 2H), 7.96 (d, *J* = 6.4 Hz, 2H), 7.68 (dd, *J* = 8.1, 1.3 Hz, 1H), 7.57 (dd, *J* = 7.6, 1.8 Hz, 1H), 7.52–7.46 (m, 2H), 7.40 (dd, *J* = 7.8, 1.9 Hz, 1H), 7.35–7.29 (m, 2H), 7.27–7.23 (m, 1H), 7.10–7.06 (m, 2H), 2.63 (s, 3H). <sup>13</sup>C{<sup>1</sup>H} NMR (101 MHz, DMSO-*d*<sub>6</sub>): δ 160.8 (C), 145.8 (CH), 133.3 (CH), 132.9 (CH), 131.49 (C), 131.46 (CH), 129.6 (C), 129.2 (CH), 129.1 (CH), 128.8 (CH), 128.1 (CH), 126.9 (CH), 126.5 (C), 123.6 (C), 122.8 (C), 118.8 (C), 117.6 (CH), 21.7 (CH<sub>3</sub>). HRMS (ESI) *m/z*: 389.0648 calcd for C<sub>22</sub>H<sub>18</sub><sup>79</sup>BrN<sub>2</sub><sup>+</sup> [M – Br]<sup>+</sup>, found 389.0661.

*1-(2-(2-Bromophenyl)-4-phenyl-1H-pyrrol-3-yl)-4-methoxypyridin-1-ium bromide (16c).* Compound **16c** (240 mg, 48%) was obtained from 1-(2-(2-bromophenyl)-2-oxoethyl)-4-methoxypyridin-1-ium bromide<sup>11</sup> (**15c**) (398 mg, 1.03 mmol, 1 equiv), triethylamine (156 mg, 1.54 mmol, 1.5 equiv) and 3-phenyl-2*H*-azirine (**4c**) (180 mg, 1.54 mmol, 1.5 equiv) in DCM (10 mL) according to the general procedure A. The product was isolated by column chromatography on silica gel (DCM/MeOH from v/v 20:1 to 10:1). Pale brown solid, mp 106 °C (dec., DCM/MeOH). <sup>1</sup>H NMR (500 MHz, DMSO-*d*<sub>6</sub>): δ 12.21 (d, *J* = 3.0 Hz, 1H), 8.75–8.69 (m, 2H), 7.70 (dd, *J* = 8.1, 1.2 Hz, 1H), 7.62–7.58 (m, 2H), 7.56 (dd, *J* = 7.6, 1.8 Hz, 1H), 7.52–7.45 (m, 1H), 7.45 (d, *J* = 3.1 Hz, 1H), 7.40 (dd, *J* = 7.8, 1.9 Hz, 1H), 7.34–7.30 (m, 2H), 7.27–7.22 (m, 1H), 7.13–7.07 (m, 2H), 4.11 (s, 3H). <sup>13</sup>C{<sup>1</sup>H} NMR (126 MHz, DMSO-*d*<sub>6</sub>): δ 171.3 (C), 148.2 (CH), 133.2 (CH), 132.8 (CH), 131.7 (C), 131.4 (CH), 129.8 (C), 129.0 (CH), 128.0 (CH), 126.73 (C), 126.71 (CH), 126.5 (C), 123.7 (C), 122.4 (C), 118.8 (C), 117.2 (CH), 113.8 (CH), 58.4 (CH<sub>3</sub>). HRMS (ESI) *m/z*: 405.0597 calcd for C<sub>22</sub>H<sub>18</sub><sup>79</sup>BrN<sub>2</sub>O<sup>+</sup> [M – Br]<sup>+</sup>, found 405.0588.

*1-(2-(2-Bromophenyl)-4-phenyl-1H-pyrrol-3-yl)-4-(4-methoxyphenyl)pyridin-1-ium bromide (16e).* Compound **16e** (462 mg, 95%) was obtained from 1-(2-(2-bromophenyl)-2-oxoethyl)-4-(4-methoxyphenyl)pyridin-1-ium bromide (**15e**) (400 mg, 0.864 mmol, 1 equiv), triethylamine (131 mg, 1.30 mmol, 1.5 equiv) and 3-phenyl-2*H*-azirine (**4c**) (152 mg, 1.30 mmol, 1.5 equiv) in DCM (10 mL) according to the general procedure A. The product was isolated by column chromatography on silica gel (DCM/MeOH from v/v 20:1 to 10:1). Yellow solid, mp 209–210 °C (DCM/MeOH). <sup>1</sup>H NMR (400 MHz, DMSO-*d*<sub>6</sub>): δ 12.29 (d, *J* = 2.8 Hz, 1H), 8.79–8.73 (m, 2H), 8.46–8.42 (m, 2H), 8.17–8.11 (m, 2H), 7.70 (dd, *J* = 8.0, 1.2 Hz, 1H), 7.60 (dd, *J* = 7.7, 1.8 Hz, 1H), 7.54–7.48 (m, 2H), 7.43–7.36 (m, 1H), 7.36–7.30 (m, 2H), 7.28–7.22 (m, 1H), 7.19–7.13 (m, 4H), 3.88 (s, 3H). <sup>13</sup>C{<sup>1</sup>H} NMR (101 MHz, DMSO-*d*<sub>6</sub>): δ 163.3 (C), 154.6 (C), 146.2 (CH), 133.3 (CH), 132.9 (CH), 131.6 (C), 131.4 (CH), 130.5 (CH), 129.7 (C), 129.1 (CH), 128.2 (CH), 126.94 (CH), 126.86 (CH), 126.5 (C), 124.6 (C), 123.6 (C), 123.0 (CH), 122.7 (C), 118.8 (C), 117.7 (CH), 115.3 (CH), 55.8 (CH<sub>3</sub>). HRMS (ESI) *m/z*: 481.0910 calcd for C<sub>28</sub>H<sub>22</sub><sup>79</sup>BrN<sub>2</sub>O<sup>+</sup> [M – Br]<sup>+</sup>, found 481.0895.

*1-(2-(2-Bromophenyl)-4-phenyl-1H-pyrrol-3-yl)-3,5-dimethylpyridin-1-ium bromide (16f).* Compound **16f** (177 mg, 35%) was obtained from 1-(2-(2-bromophenyl)-2-oxoethyl)-3,5-dimethylpyridin-1-ium bromide<sup>11</sup> (**15f**) (398 mg, 1.03 mmol, 1 equiv), triethylamine (156 mg, 1.55 mmol, 1.5 equiv) and 3-phenyl-2*H*-azirine (**4c**) (181 mg, 1.55 mmol, 1.5 equiv) in DCM (6 mL) according to the general procedure A. The product was isolated by column chromatography on silica gel (DCM/MeOH from v/v 20:1 to 10:1). Pale yellow solid, mp 339–340 °C

(DCM/MeOH).  $^1\text{H}$  NMR (400 MHz, DMSO- $d_6$ ):  $\delta$  12.31 (br. s, 1H), 8.74 (s, 2H), 8.41 (s, 1H), 7.68 (d,  $J$  = 7.5 Hz, 1H), 7.57 (dd,  $J$  = 7.6, 1.5 Hz, 1H), 7.52–7.45 (m, 2H), 7.42–7.34 (m, 1H), 7.35–7.27 (m, 2H), 7.27–7.21 (m, 1H), 7.08 (d,  $J$  = 7.1 Hz, 2H), 2.35 (s, 6H).  $^{13}\text{C}\{^1\text{H}\}$  NMR (101 MHz, DMSO- $d_6$ ):  $\delta$  147.9 (CH), 143.7 (CH), 138.4 (C), 133.2 (CH), 132.8 (CH), 131.48 (C), 131.45 (CH), 129.5 (C), 129.0 (CH), 128.0 (CH), 126.9 (CH), 126.7 (C), 126.6 (CH), 123.6 (C), 123.0 (C), 118.7 (C), 117.4 (CH), 17.5 ( $\text{CH}_3$ ). HRMS (ESI)  $m/z$ : 403.0804 calcd for  $\text{C}_{23}\text{H}_{20}^{79}\text{BrN}_2^+ [\text{M} - \text{Br}]^+$ , found 403.0819.

*2-(2-(2-Bromophenyl)-4-phenyl-1H-pyrrol-3-yl)isoquinolin-2-ium bromide (16g)*. Compound **16g** (214 mg, 44%) was obtained from 2-(2-(2-bromophenyl)-2-oxoethyl)isoquinolin-2-ium bromide (**15g**) (388 mg, 0.956 mmol, 1 equiv), triethylamine (145 mg, 1.43 mmol, 1.5 equiv) and 3-phenyl-2H-azirine (**4c**) (168 mg, 1.43 mmol, 1.5 equiv) in DCM (6 mL) according to the general procedure A. The product was isolated by column chromatography on silica gel (DCM/MeOH from v/v 20:1 to 10:1). Pale orange solid, mp 182–183 °C (DCM/MeOH).  $^1\text{H}$  NMR (500 MHz, DMSO- $d_6$ ):  $\delta$  12.39 (br. s, 1H), 10.02 (s, 1H), 8.64–8.54 (m, 2H), 8.42 (d,  $J$  = 8.3 Hz, 1H), 8.38 (d,  $J$  = 8.2 Hz, 1H), 8.33–8.27 (m, 1H), 8.08–8.02 (m, 1H), 7.66–7.59 (m, 2H), 7.56 (d,  $J$  = 2.9 Hz, 1H), 7.48 (m,  $J$  = 7.3 Hz, 1H), 7.46–7.24 (m, 1H), 7.27–7.21 (m, 3H), 7.11 (d,  $J$  = 7.1 Hz, 2H).  $^{13}\text{C}\{^1\text{H}\}$  NMR (126 MHz, DMSO- $d_6$ ):  $\delta$  151.7 (CH), 138.1 (CH), 137.1 (CH), 136.9 (C), 133.3 (CH), 132.8 (CH), 131.8 (CH), 131.5 (C), 131.4 (CH), 130.7 (CH), 129.5 (C), 129.1 (CH), 128.2 (CH), 127.5 (CH), 127.3 (C), 126.9 (CH), 126.3 (CH), 123.43 (C), 123.28 (C), 119.0 (C), 117.8 (CH). HRMS (ESI)  $m/z$ : 425.0648 calcd for  $\text{C}_{25}\text{H}_{18}^{79}\text{BrN}_2^+ [\text{M} - \text{Br}]^+$ , found 425.0658.

*1-(2-(2-Bromophenyl)-4-(4-methoxyphenyl)-1H-pyrrol-3-yl)pyridin-1-ium bromide (16h)*. Compound **16h** (249 mg, 50%) was obtained from 1-(2-(2-bromophenyl)-2-oxoethyl)pyridin-1-ium bromide (**15h**) (367 mg, 1.02 mmol, 1 equiv), triethylamine (156 mg, 1.54 mmol, 1.5 equiv) and 3-(4-methoxyphenyl)-2H-azirine (**4d**) (227 mg, 1.54 mmol, 1.5 equiv) in DCM (5 mL) according to the general procedure A. The product was isolated by column chromatography on silica gel (DCM/MeOH from v/v 20:1 to 10:1). Bright yellow solid, mp 254–255 °C (DCM/MeOH).  $^1\text{H}$  NMR (400 MHz, DMSO- $d_6$ ):  $\delta$  12.28 (br. s, 1H), 8.87 (d,  $J$  = 5.5 Hz, 2H), 8.68 (t,  $J$  = 7.9 Hz, 1H), 8.15 (dd,  $J$  = 7.6, 6.8 Hz, 2H), 7.67 (dd,  $J$  = 8.0, 0.8 Hz, 1H), 7.57 (dd,  $J$  = 7.6, 1.6 Hz, 1H), 7.53–7.47 (m, 1H), 7.43–7.34 (m, 2H), 7.06–6.96 (m, 2H), 6.93–6.83 (m, 2H), 3.73 (s, 3H).  $^{13}\text{C}\{^1\text{H}\}$  NMR (101 MHz, DMSO- $d_6$ ):  $\delta$  158.3 (C), 146.8 (CH), 133.3 (CH), 132.9 (CH), 131.4 (CH), 128.6 (CH), 128.3 (CH), 128.2 (CH), 126.2 (C), 123.5 (C), 123.4 (C),

123.2 (C), 117.2 (CH), 114.5 (CH), 55.1 (CH<sub>3</sub>). HRMS (ESI) *m/z*: 405.0597 calcd for C<sub>22</sub>H<sub>18</sub><sup>79</sup>BrN<sub>2</sub>O<sup>+</sup> [M – Br]<sup>+</sup>, found 405.0614.

*1-(2-(2-Bromophenyl)-4-phenyl-1H-pyrrol-3-yl)-4-cyanopyridin-1-ium bromide (16i)*. Compound **16i** (46 mg, 18%) was obtained from 1-(2-(2-bromophenyl)-2-oxoethyl)-4-cyanopyridin-1-ium bromide<sup>11</sup> (**15i**) (200 mg, 0.523 mmol, 1 equiv), NiBr<sub>2</sub>·3H<sub>2</sub>O (28.5 mg, 0.105 mmol, 0.2 equiv) and 3-phenyl-2*H*-azirine (**4c**) (92 mg, 0.785 mmol, 1.5 equiv) in acetone (10 mL) according to the general procedure B. Orange solid, mp 276–278 °C (acetone). <sup>1</sup>H NMR (400 MHz, DMSO-*d*<sub>6</sub>): δ 12.49 (br. s, 1H), 9.13 (d, *J* = 6.2 Hz, 2H), 8.66 (d, *J* = 6.3 Hz, 2H), 7.68 (d, *J* = 8.1 Hz, 1H), 7.60 (d, *J* = 7.5 Hz, 1H), 7.55–7.49 (m, 2H), 7.42 (d, *J* = 7.8 Hz, 1H), 7.35–7.26 (m, 3H), 7.14 (d, *J* = 7.3 Hz, 2H). <sup>13</sup>C{<sup>1</sup>H} NMR (101 MHz, DMSO-*d*<sub>6</sub>): δ 147.0 (CH), 133.0 (CH), 132.4 (CH), 131.1 (CH), 131.0 (CH), 130.2 (C), 128.6 (CH), 128.2 (C), 127.8 (CH), 127.2 (C), 126.6 (CH), 126.5 (CH), 126.4 (C), 122.7 (C), 122.4 (C), 118.1 (C), 117.9 (CH), 114.1 (C). HRMS (ESI) *m/z*: 400.0444 calcd for C<sub>22</sub>H<sub>15</sub><sup>79</sup>BrN<sub>3</sub><sup>+</sup> [M – Br]<sup>+</sup>, found 400.0428.

*4-Benzoyl-1-(2-(2-bromophenyl)-4-phenyl-1H-pyrrol-3-yl)pyridin-1-ium bromide (16j)*. Compound **16j** (219 mg, 45%) was obtained from 4-benzoyl-1-(2-(2-bromophenyl)-2-oxoethyl)pyridin-1-ium bromide (**15j**) (400 mg, 0.868 mmol, 1 equiv), NiBr<sub>2</sub>·3H<sub>2</sub>O (47 mg, 0.17 mmol, 0.2 equiv) and 3-phenyl-2*H*-azirine (**4c**) (203 mg, 1.74 mmol, 1.5 equiv) in acetone (20 mL) according to the general procedure B. Bright orange solid, mp 257–258 °C (acetone). <sup>1</sup>H NMR (400 MHz, DMSO-*d*<sub>6</sub>): δ 12.44 (br. s, 1H), 9.04 (d, *J* = 6.4 Hz, 2H), 8.35 (d, *J* = 6.4 Hz, 2H), 7.80–7.78 (m, 3H), 7.72 (d, *J* = 7.8 Hz, 1H), 7.68–7.61 (m, 3H), 7.56–7.54 (m, 2H), 7.47–7.40 (m, 1H), 7.39–7.35 (m, 2H), 7.30–7.35 (m, 1H), 7.21 (d, *J* = 7.2 Hz, 2H). <sup>13</sup>C{<sup>1</sup>H} NMR (101 MHz, DMSO-*d*<sub>6</sub>): δ 191.6 (C), 152.0 (C), 147.5 (CH), 134.8 (CH), 134.0 (C), 133.4 (CH), 133.0 (CH), 131.6 (CH), 131.1 (C), 130.1 (CH), 129.2 (CH), 129.1 (CH), 128.3 (CH), 127.5 (CH), 127.4 (CH), 127.1 (CH), 126.8 (C), 123.3 (C), 123.0 (C), 118.8 (C), 118.3 (CH). HRMS (ESI) *m/z*: 479.0754 calcd for C<sub>28</sub>H<sub>20</sub><sup>79</sup>BrN<sub>2</sub>O<sup>+</sup> [M – Br]<sup>+</sup>, found 479.0775.

*3-Phenylpyrido[2,1-*a*]pyrrolo[3,2-*c*]isoquinolin-1-ium bromide (17a)*. Compound **17a** (120 mg, 77%) was obtained from 1-(2-(2-bromophenyl)-4-phenyl-1*H*-pyrrol-3-yl)pyridin-1-ium bromide (**16a**) (190 mg, 0.42 mmol, 1 equiv), TTMSS (155 mg, 0.62 mmol, 1.5 equiv) and AIBN (137 mg, 0.83 mmol, 2 equiv) according to the general procedure C. Yellow solid, mp 343–344 °C (dec., MeCN/EtOAc). <sup>1</sup>H NMR (400 MHz, DMSO-*d*<sub>6</sub>): δ 13.57 (d, *J* = 3.1 Hz, 1H), 9.56 (d, *J* = 8.7 Hz, 1H), 9.18–9.13 (m, 2H), 8.67 (d, *J* = 8.1 Hz, 1H), 8.48 (ddd, *J* = 8.7, 7.2, 1.3 Hz, 1H), 8.18–8.12 (m, 1H), 8.07–8.01 (m, 1H), 7.93–7.86 (m, 2H), 7.66–7.53 (m, 5H). <sup>13</sup>C{<sup>1</sup>H} NMR

(101 MHz, DMSO-*d*<sub>6</sub>):  $\delta$  139.8 (C), 136.8 (CH), 133.7 (CH), 133.3 (CH), 132.8 (C), 130.2 (CH), 129.1 (CH), 128.2 (CH), 127.8 (CH), 126.5 (CH), 126.4 (CH), 124.5 (C), 124.2 (CH), 124.1 (C), 123.5 (CH), 121.2 (C), 121.0 (CH), 120.5 (C), 115.0 (C). HRMS (ESI) *m/z*: 295.1230 calcd for C<sub>21</sub>H<sub>15</sub>N<sub>2</sub><sup>+</sup> [M – Br]<sup>+</sup>, found 295.1234.

*7-Methyl-3-phenylpyrido[2,1-*a*]pyrrolo[3,2-*c*]isoquinolin-1-ium bromide (17b)*. Compound **17b** (43 mg, 46%) was obtained from 1-(2-(2-bromophenyl)-4-phenyl-1*H*-pyrrol-3-yl)-4-methylpyridin-1-ium bromide (**16b**) (100 mg, 0.215 mmol, 1 equiv), TTMSS (80 mg, 0.32 mmol, 1.5 equiv) and AIBN (70 mg, 0.43 mmol, 2 equiv) according to the general procedure C. Pale yellow solid, mp > 400 °C (MeCN/EtOAc). <sup>1</sup>H NMR (400 MHz, DMSO-*d*<sub>6</sub>):  $\delta$  13.45 (d, *J* = 3.1 Hz, 1H), 9.43 (s, 1H), 9.14 (d, *J* = 8.5 Hz, 1H), 9.01 (d, *J* = 7.0 Hz, 1H), 8.62 (d, *J* = 8.1 Hz, 1H), 8.18–8.11 (m, 1H), 7.94–7.84 (m, 3H), 7.64–7.53 (m, 5H), 2.72 (s, 3H). <sup>13</sup>C{<sup>1</sup>H} NMR (101 MHz, DMSO-*d*<sub>6</sub>):  $\delta$  149.6 (C), 139.8 (C), 133.7 (CH), 132.9 (C), 132.7 (CH), 130.2 (CH), 129.1 (CH), 128.2 (CH), 127.7 (CH), 126.6 (CH), 126.1 (CH), 124.9 (CH), 124.4 (C), 124.0 (C), 123.6 (CH), 121.1 (C), 120.9 (CH), 120.3 (C), 114.9 (C), 21.2 (CH<sub>3</sub>). HRMS (ESI) *m/z*: 309.1386 calcd for C<sub>22</sub>H<sub>17</sub>N<sub>2</sub><sup>+</sup> [M – Br]<sup>+</sup>, found 309.1399.

*7-Methoxy-3-phenylpyrido[2,1-*a*]pyrrolo[3,2-*c*]isoquinolin-1-ium bromide (17c)*. Compound **17c** (86 mg, 60%) was obtained from 1-(2-(2-bromophenyl)-4-phenyl-1*H*-pyrrol-3-yl)-4-methoxypyridin-1-ium bromide (**16c**) (173 mg, 0.357 mmol, 1 equiv), TTMSS (133 mg, 0.535 mmol, 1.5 equiv) and AIBN (117 mg, 0.713 mmol, 2 equiv) according to the general procedure C. Pale yellow solid, mp 296–298 °C (MeCN/EtOAc). <sup>1</sup>H NMR (400 MHz, DMSO-*d*<sub>6</sub>):  $\delta$  13.31 (d, *J* = 3.1 Hz, 1H), 9.15 (d, *J* = 8.6 Hz, 1H), 8.95 (d, *J* = 7.6 Hz, 1H), 8.75 (d, *J* = 3.0 Hz, 1H), 8.55 (dd, *J* = 8.2, 1.2 Hz, 1H), 8.13–8.06 (m, 1H), 7.82 (ddd, *J* = 8.4, 7.1, 1.2 Hz, 1H), 7.78–7.73 (m, 2H), 7.63–7.52 (m, 5H), 4.22 (s, 3H). <sup>13</sup>C{<sup>1</sup>H} NMR (101 MHz, DMSO-*d*<sub>6</sub>):  $\delta$  164.9 (C), 142.9 (C), 135.4 (CH), 133.8 (CH), 133.0 (C), 130.2 (CH), 129.1 (CH), 128.1 (CH), 127.3 (CH), 127.0 (CH), 125.5 (CH), 124.5 (C), 122.6 (C), 120.9 (C), 120.8 (CH), 120.0 (C), 114.6 (C), 113.4 (CH), 106.0 (CH), 57.8 (CH<sub>3</sub>). HRMS (ESI) *m/z*: 325.1335 calcd for C<sub>22</sub>H<sub>17</sub>N<sub>2</sub>O<sup>+</sup> [M – Br]<sup>+</sup>, found 325.1329.

*3,7-Diphenylpyrido[2,1-*a*]pyrrolo[3,2-*c*]isoquinolin-1-ium bromide (17d)*. Compound **17d** (58 mg, 69%) was obtained from 1-(2-(2-bromophenyl)-4-phenyl-1*H*-pyrrol-3-yl)-4-phenylpyridin-1-ium bromide (**16d**)<sup>4</sup> (100 mg, 0.19 mmol, 1 equiv), TTMSS (71 mg, 0.28 mmol, 1.5 equiv) and AIBN (62 mg, 0.38 mmol, 2 equiv) according to the general procedure C. Bright yellow, mp > 400 °C (MeCN/EtOAc). <sup>1</sup>H NMR (400 MHz, DMSO-*d*<sub>6</sub>):  $\delta$  13.53 (d, *J* = 1.4 Hz, 1H), 9.68 (d, *J* = 1.7 Hz, 1H), 9.47 (d, *J* = 8.6 Hz, 1H), 9.16 (d, *J* = 7.2 Hz, 1H), 8.65 (d, *J* = 8.0 Hz, 1H), 8.50



(dd,  $J = 7.3, 2.0$  Hz, 1H), 8.27 (dd,  $J = 7.6, 1.9$  Hz, 2H), 8.21–8.15 (m, 1H), 7.96–7.88 (m, 2H), 7.70–7.56 (m, 8H).  $^{13}\text{C}\{^1\text{H}\}$  NMR (101 MHz, DMSO- $d_6$ ):  $\delta$  146.7 (C), 140.4 (C), 134.3 (C), 133.9 (CH), 133.6 (CH), 131.2 (CH), 130.3 (CH), 129.5 (CH), 129.2 (CH), 128.3 (CH), 128.0 (CH), 127.7 (CH), 127.3 (CH), 126.5 (CH), 124.5 (C), 121.7 (C), 120.9 (CH), 120.5 (C), 119.8 (CH), 115.0 (C). HRMS (ESI)  $m/z$ : 371.1543 calcd for  $\text{C}_{27}\text{H}_{19}\text{N}_2^+ [\text{M} - \text{Br}]^+$ , found 371.1554.

*7-(4-Methoxyphenyl)-3-phenylpyrido[2,1-*a*]pyrrolo[3,2-*c*]isoquinolin-1-ium bromide (17e).* Compound **17e** (66 mg, 46%) was obtained from 1-(2-(2-bromophenyl)-4-phenyl-1*H*-pyrrol-3-yl)-4-(4-methoxyphenyl)pyridin-1-ium bromide (**16e**) (170 mg, 0.302 mmol, 1 equiv), TTMSS (113 mg, 0.456 mmol, 1.5 equiv) and AIBN (99 mg, 0.60 mmol, 2 equiv) according to the general procedure C. Bright yellow solid, mp 295–296 °C (MeCN/EtOAc).  $^1\text{H}$  NMR (400 MHz, DMSO- $d_6$ ):  $\delta$  13.48–13.43 (m, 1H), 9.53 (d,  $J = 2.2$  Hz, 1H), 9.41 (d,  $J = 8.6$  Hz, 1H), 9.05 (d,  $J = 7.3$  Hz, 1H), 8.60 (d,  $J = 8.1$  Hz, 1H), 8.42 (dd,  $J = 7.3, 2.1$  Hz, 1H), 8.30–8.22 (m, 2H), 8.16–8.09 (m, 1H), 7.92–7.83 (m, 2H), 7.70–7.53 (m, 5H), 7.19–7.10 (m, 2H), 3.88 (s, 3H).  $^{13}\text{C}\{^1\text{H}\}$  NMR (101 MHz, DMSO- $d_6$ ):  $\delta$  162.0 (C), 146.3 (C), 140.3 (C), 133.7 (CH), 133.3 (CH), 133.0 (C), 130.3 (CH), 129.7 (CH), 129.2 (CH), 128.2 (CH), 127.6 (CH), 127.1 (CH), 126.3 (CH), 126.1 (C), 124.4 (C), 124.1 (C), 121.6 (C), 120.8 (CH), 120.3 (C), 120.0 (CH), 118.2 (CH), 114.91 (CH), 114.86 (C), 55.6 (CH<sub>3</sub>). HRMS (ESI)  $m/z$ : 401.1648 calcd for  $\text{C}_{28}\text{H}_{21}\text{N}_2\text{O}^+ [\text{M} - \text{Br}]^+$ , found 401.1644.

*6,8-Dimethyl-3-phenylpyrido[2,1-*a*]pyrrolo[3,2-*c*]isoquinolin-1-ium bromide (17f).* Compound **17f** (52 mg, 64%) was obtained from 1-(2-(2-bromophenyl)-4-phenyl-1*H*-pyrrol-3-yl)-3,5-dimethylpyridin-1-ium bromide (**16f**) (100 mg, 0.207 mmol, 1 equiv), TTMSS (77 mg, 0.31 mmol, 1.5 equiv) and AIBN (68 mg, 0.41 mmol, 2 equiv) according to the general procedure C. Bright yellow solid, mp > 400 °C (MeCN/EtOAc).  $^1\text{H}$  NMR (400 MHz, DMSO- $d_6$ ):  $\delta$  13.45 (br. s, 1H), 9.00 (d,  $J = 8.7$  Hz, 1H), 8.94 (s, 1H), 8.65 (d,  $J = 7.9$  Hz, 1H), 8.35 (s, 1H), 8.17–8.09 (m, 1H), 7.89 (s, 1H), 7.89–7.83 (m, 1H), 7.66–7.50 (m, 5H), 3.19 (s, 3H), 2.26 (s, 3H).  $^{13}\text{C}\{^1\text{H}\}$  NMR (101 MHz, DMSO- $d_6$ ):  $\delta$  142.4 (CH), 138.5 (C), 136.3 (C), 133.0 (C), 132.7 (CH), 131.9 (C), 131.7 (CH), 130.2 (CH), 129.8 (CH), 129.0 (CH), 128.2 (CH), 126.6 (CH), 126.4 (CH), 124.8 (C), 124.6 (C), 120.8 (CH), 120.7 (C), 115.2 (C), 26.0 (CH<sub>3</sub>), 17.4 (CH<sub>3</sub>). HRMS (ESI)  $m/z$ : 323.1543 calcd for  $\text{C}_{23}\text{H}_{19}\text{N}_2^+ [\text{M} - \text{Br}]^+$ , found 323.1548.

*3-Phenyl-1*H*-isoquinolino[1,2-*a*]pyrrolo[3,2-*c*]isoquinolin-4-ium bromide (17g).* Compound **17g** (40 mg, 49%) was obtained from 2-(2-(2-bromophenyl)-4-phenyl-1*H*-pyrrol-3-yl)isoquinolin-2-ium bromide (**16g**) (120 mg, 0.237 mmol, 1 equiv), TTMSS (89 mg, 0.36 mmol, 1.5 equiv) and AIBN (75 mg, 0.47 mmol, 2 equiv) according to the general procedure C. Pale orange solid, mp

250–253 °C (dec., MeCN/EtOAc). <sup>1</sup>H NMR (400 MHz, DMSO-*d*<sub>6</sub>): δ 13.69 (d, *J* = 2.9 Hz, 1H), 9.13–9.05 (m, 2H), 8.83–8.76 (m, 2H), 8.33–8.27 (m, 3H), 8.19–8.15 (m, 1H), 8.12–8.07 (m, 2H), 7.99–7.95 (m, 1H), 7.66–7.57 (m, 5H). <sup>13</sup>C{<sup>1</sup>H} NMR (101 MHz, DMSO-*d*<sub>6</sub>): δ 141.7 (C), 134.4 (CH), 133.2 (CH), 132.8 (C), 132.7 (C), 132.2 (CH), 131.2 (CH), 130.5 (CH), 130.3 (CH), 129.0 (CH), 128.2 (CH), 128.1 (CH), 127.6 (CH), 127.5 (CH), 127.1 (CH), 125.9 (C), 125.5 (C), 124.9 (C), 122.0 (C), 121.4 (CH), 121.09 (C), 121.06 (CH), 114.8 (C). HRMS (ESI) *m/z*: 345.1386 calcd for C<sub>25</sub>H<sub>17</sub>N<sub>2</sub><sup>+</sup> [M – Br]<sup>+</sup>, found 345.1398.

*3-(4-Methoxyphenyl)pyrido[2,1-*a*]pyrrolo[3,2-*c*]isoquinolin-1-ium bromide (17h)*. Compound **17h** (111 mg, 67%) was obtained from 1-(2-(2-bromophenyl)-4-(4-methoxyphenyl)-1*H*-pyrrol-3-yl)pyridin-1-ium bromide (**16h**) (200 mg, 0.412 mmol, 1 equiv), TTMSS (152 mg, 0.617 mmol, 1.5 equiv) and AIBN (135 mg, 0.823 mmol, 2 equiv) according to the general procedure C. Yellow solid, mp 249–251 °C (MeCN/EtOAc). <sup>1</sup>H NMR (400 MHz, DMSO-*d*<sub>6</sub>): δ 13.52–13.47 (m, 1H), 9.54 (d, *J* = 8.8 Hz, 1H), 9.22 (d, *J* = 6.7 Hz, 1H), 9.13 (d, *J* = 8.5 Hz, 1H), 8.65 (d, *J* = 8.1 Hz, 1H), 8.51–8.42 (m, 1H), 8.19–8.11 (m, 1H), 8.08–8.02 (m, 1H), 7.93–7.86 (m, 1H), 7.83 (d, *J* = 2.9 Hz, 1H), 7.54 (d, *J* = 8.2 Hz, 2H), 7.16 (d, *J* = 8.2 Hz, 2H), 3.88 (s, 3H). <sup>13</sup>C{<sup>1</sup>H} NMR (101 MHz, DMSO-*d*<sub>6</sub>): δ 159.2 (C), 139.9 (C), 136.8 (CH), 133.8 (CH), 133.3 (CH), 131.6 (CH), 127.8 (CH), 126.5 (CH), 126.4 (CH), 124.7 (C), 124.4 (C), 124.3 (C), 124.2 (CH), 123.5 (CH), 121.3 (C), 120.9 (CH), 120.7 (C), 114.7 (C), 114.6 (CH), 55.3 (CH<sub>3</sub>). HRMS (ESI) *m/z*: 325.1335 calcd for C<sub>22</sub>H<sub>17</sub>N<sub>2</sub>O<sup>+</sup> [M – Br]<sup>+</sup>, found 325.1341.

*3-Phenylpyrido[2,1-*a*]pyrrolo[3,2-*c*]isoquinoline (18a)*. Compound **18a** (47 mg, 99%) was obtained from 3-phenylpyrido[2,1-*a*]pyrrolo[3,2-*c*]isoquinolin-4-ium bromide (**17a**) (60 mg, 0.16 mmol) according to the general procedure D. Orange solid, mp > 400 °C (DCM). <sup>1</sup>H NMR (400 MHz, DMSO-*d*<sub>6</sub>): δ 9.41 (d, *J* = 8.8 Hz, 1H), 9.17 (d, *J* = 6.8 Hz, 1H), 9.01 (d, *J* = 8.6 Hz, 1H), 8.70 (d, *J* = 8.2 Hz, 1H), 8.24–8.14 (m, 1H), 8.04–7.97 (m, 1H), 7.87 (d, *J* = 6.9 Hz, 1H), 7.73–7.65 (m, 2H), 7.58–7.50 (m, 3H), 7.46–7.39 (m, 1H). <sup>13</sup>C{<sup>1</sup>H} NMR (101 MHz, DMSO-*d*<sub>6</sub>): δ 140.1 (CH), 136.4 (C), 136.3 (C), 134.0 (C), 131.9 (CH), 131.3 (CH), 131.2 (CH), 129.72 (CH), 129.66 (C), 128.7 (CH), 126.0 (CH), 125.4 (CH), 124.5 (CH), 123.5 (C), 121.9 (C), 121.6 (CH), 121.1 (CH), 118.8 (C), 112.8 (C). HRMS (ESI) *m/z*: 295.1230 calcd for C<sub>21</sub>H<sub>15</sub>N<sub>2</sub><sup>+</sup> [M + H]<sup>+</sup>, found 295.1234.

*1-Methyl-3-phenylpyrido[2,1-*a*]pyrrolo[3,2-*c*]isoquinolin-4-ium iodide (N-Me-18a)*.<sup>4</sup> Compound *N*-Me-**18a** (74 mg, 100%) was obtained from phenylpyrido[2,1-*a*]pyrrolo[3,2-*c*]isoquinoline (**18a**) (50 mg, 0.17 mmol) and methyl iodide (24.5 mg, 0.17 mmol, 1 equiv) in dry DCM (8 mL) likewise *N*-Me-**3a**.

*1-Benzyl-3-phenylpyrido[2,1-*a*]pyrrolo[3,2-*c*]isoquinolin-4-ium bromide (N-Bn-18a).*<sup>4</sup>

Compound *N*-Bn-18a (55 mg, 100%) was obtained from 3-phenylpyrido[2,1-*a*]pyrrolo[3,2-*c*]isoquinoline (18a) (35 mg, 0.12 mmol), benzyl bromide (21 mg, 0.12 mmol, 1 equiv) and K<sub>2</sub>CO<sub>3</sub> (33 mg, 0.24 mmol, 2 equiv) in dry acetonitrile (5 mL) likewise *N*-Bn-3a.

*7-Methoxy-3-phenylpyrido[2,1-*a*]pyrrolo[3,2-*c*]isoquinoline (18c).* Compound 18c (21 mg, 97%) was obtained from 7-methoxy-3-phenylpyrido[2,1-*a*]pyrrolo[3,2-*c*]isoquinolin-4-ium bromide (17c) (27 mg, 0.067 mmol) according to the general procedure D. Orange solid, mp 225–227 °C (DCM). <sup>1</sup>H NMR (400 MHz, DMSO-*d*<sub>6</sub>): δ 9.02 (d, *J* = 7.7 Hz, 1H), 8.93 (d, *J* = 8.6 Hz, 1H), 8.59–8.53 (m, 2H), 7.88–7.82 (m, 1H), 7.58–7.45 (m, 6H), 7.43 (s, 1H), 7.34 (ddd, *J* = 10.2, 6.1, 4.1 Hz, 1H), 4.16 (s, 3H). <sup>13</sup>C{<sup>1</sup>H} NMR (126 MHz, DMSO-*d*<sub>6</sub>): δ 161.4 (C), 139.9 (C), 136.4 (C), 133.6 (CH), 133.5 (C), 132.2 (CH), 130.1 (CH), 130.0 (C), 129.7 (CH), 128.7 (CH), 126.1 (CH), 126.0 (CH), 124.0 (CH), 121.0 (C), 120.9 (CH), 118.4 (C), 112.6 (CH), 112.5 (C), 104.5 (CH), 57.1 (CH<sub>3</sub>). HRMS (ESI) *m/z*: 325.1335 calcd for C<sub>22</sub>H<sub>17</sub>N<sub>2</sub>O<sup>+</sup>[M + H]<sup>+</sup>, found 325.1350.

*3,7-Diphenylpyrido[2,1-*a*]pyrrolo[3,2-*c*]isoquinoline (18d).* Compound 18d (30 mg, 99%) was obtained from 3,7-diphenylpyrido[2,1-*a*]pyrrolo[3,2-*c*]isoquinolin-4-ium bromide (17d) (37 mg, 0.082 mmol) according to the general procedure D. Red solid, mp 224–225 °C (DCM). <sup>1</sup>H NMR (400 MHz, DMSO-*d*<sub>6</sub>): δ 9.48 (d, *J* = 2.4 Hz, 1H), 9.24–9.12 (m, 2H), 8.65 (d, *J* = 8.2 Hz, 1H), 8.25–8.14 (m, 3H), 7.94–7.85 (m, 1H), 7.64–7.47 (m, 9H), 7.41–7.33 (m, 1H). <sup>13</sup>C{<sup>1</sup>H} NMR (101 MHz, DMSO-*d*<sub>6</sub>): δ 141.2 (CH), 140.9 (C), 136.7 (C), 136.4 (C), 135.2 (C), 134.8 (CH), 131.8 (CH), 131.3 (CH), 130.3 (C), 130.0 (CH), 129.7 (CH), 129.3 (CH), 128.7 (CH), 127.4 (CH), 126.0 (CH), 125.9 (CH), 124.2 (CH), 121.8 (C), 121.0 (CH), 119.3 (CH), 119.20 (CH), 119.06 (C), 112.6 (C). HRMS (ESI) *m/z*: 371.1543 calcd for C<sub>27</sub>H<sub>19</sub>N<sub>2</sub><sup>+</sup> [M + H]<sup>+</sup>, found 371.1534.

*7-(4-Methoxyphenyl)-3-phenylpyrido[2,1-*a*]pyrrolo[3,2-*c*]isoquinoline (18e).* Compound 18e (21 mg, 99%) was obtained from 7-(4-methoxyphenyl)-3-phenylpyrido[2,1-*a*]pyrrolo[3,2-*c*]isoquinolin-4-ium bromide (17e) (25 mg, 0.052 mmol) according to the general procedure D. Red solid, mp > 400 °C (DCM). <sup>1</sup>H NMR (400 MHz, DMSO-*d*<sub>6</sub>): δ 9.43 (d, *J* = 2.2 Hz, 1H), 9.21 (d, *J* = 8.6 Hz, 1H), 9.13 (d, *J* = 7.3 Hz, 1H), 8.67–8.62 (m, 1H), 8.25–8.18 (m, 3H), 7.93–7.87 (m, 1H), 7.65–7.59 (m, 1H), 7.58–7.49 (m, 5H), 7.41–7.36 (m, 1H), 7.19–7.12 (m, 2H), 3.88 (s, 3H). <sup>13</sup>C{<sup>1</sup>H} NMR (101 MHz, DMSO-*d*<sub>6</sub>): δ 161.0 (C), 141.0 (C), 139.7 (CH), 136.8 (C), 136.5 (C), 133.7 (C), 131.8 (CH), 131.3 (CH), 129.9 (C), 129.8 (CH), 128.9 (CH), 128.7 (CH), 127.2 (C), 126.0 (CH), 124.2 (CH), 121.5 (C), 121.0 (CH), 119.1 (C), 118.6 (CH), 117.9

(CH), 114.7 (CH), 112.7 (C), 55.4 (CH<sub>3</sub>). HRMS (ESI) *m/z*: 401.1648 calcd for C<sub>28</sub>H<sub>21</sub>N<sub>2</sub>O<sup>+</sup>[M + H]<sup>+</sup>, found 401.1662.

*6,8-Dimethyl-3-phenylpyrido[2,1-*a*]pyrrolo[3,2-*c*]isoquinoline (18f)*. Compound **18f** (28 mg, 99%) was obtained from 6,8-dimethyl-3-phenylpyrido[2,1-*a*]pyrrolo[3,2-*c*]isoquinolin-4-ium bromide (**17f**) (35 mg, 0.087 mmol) according to the general procedure D. Orange solid, mp 220–222 °C (DCM). <sup>1</sup>H NMR (400 MHz, DMSO-*d*<sub>6</sub>): δ 8.97 (s, 1H), 8.83 (d, *J* = 8.8 Hz, 1H), 8.73–8.67 (m, 1H), 7.92 (s, 1H), 7.90–7.84 (m, 1H), 7.60–7.45 (m, 6H), 7.40–7.33 (m, 1H), 3.15 (s, 3H), 2.25 (s, 3H). <sup>13</sup>C{<sup>1</sup>H} NMR (101 MHz, DMSO-*d*<sub>6</sub>): δ 137.1 (CH), 136.6 (C), 135.3 (C), 134.4 (C), 130.8 (CH), 130.6 (C), 129.9 (C), 129.6 (CH), 129.4 (CH), 128.7 (CH), 128.5 (CH), 125.9 (C), 123.1 (CH), 122.2 (C), 121.0 (CH), 119.5 (C), 112.8 (C), 26.2 (CH<sub>3</sub>), 17.4 (CH<sub>3</sub>). HRMS (ESI) *m/z*: 323.1543 calcd for C<sub>23</sub>H<sub>19</sub>N<sub>2</sub><sup>+</sup>[M + H]<sup>+</sup>, found 323.1547.

*3-Phenylisoquinolino[1,2-*a*]pyrrolo[3,2-*c*]isoquinoline (18g)*. Compound **18g** (25 mg, 99%) was obtained from 3-phenylisoquinolino[1,2-*a*]pyrrolo[3,2-*c*]isoquinolin-4-ium bromide (**17g**) (31 mg, 0.073 mmol) according to the general procedure D. Dark purple solid, mp 176–178 °C (DCM). <sup>1</sup>H NMR (400 MHz, DMSO-*d*<sub>6</sub>): δ 9.01–8.92 (m, 2H), 8.84–8.76 (m, 2H), 8.31 (s, 1H), 8.22–8.17 (m, 1H), 8.08–7.96 (m, 3H), 7.85 (s, 1H), 7.74–7.67 (m, 1H), 7.59–7.50 (m, 4H), 7.45–7.39 (m, 1H). <sup>13</sup>C{<sup>1</sup>H} NMR (101 MHz, DMSO-*d*<sub>6</sub>): δ 135.4 (C), 132.49 (C), 132.47 (CH), 131.4 (CH), 131.2 (C), 130.7 (CH), 130.4 (CH), 129.8 (CH), 129.7 (CH), 129.6, 128.7 (CH), 127.3 (CH), 127.0 (CH), 126.6 (CH), 126.0 (C), 125.3 (CH), 125.2 (CH), 123.4 (C), 121.4 (CH), 119.8 (CH), 119.2 (C), 112.9 (C). HRMS (ESI) *m/z*: 345.1386 calcd for C<sub>25</sub>H<sub>17</sub>N<sub>2</sub><sup>+</sup>[M + H]<sup>+</sup>, found 345.1391.

*3-(4-Methoxyphenyl)pyrido[2,1-*a*]pyrrolo[3,2-*c*]isoquinoline (18h)*. Compound **18h** (56 mg, 100%) was obtained from 3-(4-methoxyphenyl)pyrido[2,1-*a*]pyrrolo[3,2-*c*]isoquinolin-4-ium bromide (**17h**) (70 mg, 0.17 mmol) according to the general procedure D. Saturated red solid, mp 169–170 °C (DCM). <sup>1</sup>H NMR (400 MHz, DMSO-*d*<sub>6</sub>): δ 9.32 (d, *J* = 8.9 Hz, 1H), 9.18 (d, *J* = 6.8 Hz, 1H), 8.92 (d, *J* = 8.6 Hz, 1H), 8.65 (d, *J* = 8.2 Hz, 1H), 8.14–8.03 (m, 1H), 7.94–7.87 (m, 1H), 7.83–7.76 (m, 1H), 7.66–7.56 (m, 1H), 7.55 (s, 1H), 7.43 (d, *J* = 8.1 Hz, 2H), 7.07 (d, *J* = 8.2 Hz, 2H), 3.84 (s, 3H). <sup>13</sup>C{<sup>1</sup>H} NMR (101 MHz, DMSO-*d*<sub>6</sub>): δ 158.0 (C), 139.3 (CH), 136.4 (C), 133.2 (C), 131.9 (CH), 131.3 (CH), 131.09 (CH), 131.06 (CH), 129.5 (C), 128.3 (C), 125.5 (CH), 124.6 (CH), 123.6 (CH), 121.9 (C), 121.7 (CH), 121.1 (CH), 118.8 (C), 114.2 (CH), 112.4, 55.1 (CH<sub>3</sub>). HRMS (ESI) *m/z*: 325.1335 calcd for C<sub>22</sub>H<sub>17</sub>N<sub>2</sub>O<sup>+</sup>[M + H]<sup>+</sup>, found 325.1346.

2-Phenylpyrido[2,1-*a*]pyrrolo[3,2-*c*]isoquinoline (**19**).<sup>4</sup> 3-Phenylpyrido[2,1-*a*]pyrrolo[3,2-*c*]isoquinoline (**18a**) (70 mg, 0.24 mmol) was dissolved in dry benzene (3 mL), argon was bubbled through reaction mixture for 10 minutes and AlCl<sub>3</sub> (160 mg, 1.19 mmol, 5 equiv) was added in one portion. The reaction mixture was refluxed for 3 h, then it was quenched with aq 10% NaOH and extracted 3 times with DCM. The combined DCM phases were washed with brine and dried under Na<sub>2</sub>SO<sub>4</sub>, filtered and evaporated under reduced pressure. The residue was washed with Et<sub>2</sub>O to produce **19** (63 mg, 90%), red solid, mp 164–165°C (DCM).

1-Methyl-2-phenylpyrido[2,1-*a*]pyrrolo[3,2-*c*]isoquinolin-4-ium iodide (*N*-Me-**19**). Compound *N*-Me-**19** (44 mg, 100%) was obtained from 2-phenylpyrido[2,1-*a*]pyrrolo[3,2-*c*]isoquinoline (**19**) (30 mg, 0.10 mmol) and methyl iodide (14.5 mg, 0.10 mmol, 1 equiv) in dry DCM (5 mL) likewise *N*-Me-**3a**. Orange solid, mp 165–166 °C (DCM). <sup>1</sup>H NMR (400 MHz, DMSO-*d*<sub>6</sub>): δ 9.88 (d, *J* = 6.6 Hz, 1H), 9.59 (d, *J* = 8.8 Hz, 1H), 9.27 (d, *J* = 8.5 Hz, 1H), 8.84 (d, *J* = 8.4 Hz, 1H), 8.59–8.52 (m, 1H), 8.30–8.26 (m, 1H), 8.22–8.18 (m, 1H), 7.99–7.93 (m, 1H), 7.86 (s, 1H), 7.73 (d, *J* = 6.3 Hz, 2H), 7.70–7.57 (m, 3H), 4.31 (s, 3H). <sup>13</sup>C{<sup>1</sup>H} NMR (101 MHz, DMSO-*d*<sub>6</sub>): δ 142.6 (C), 137.2 (CH), 134.4 (CH), 133.7 (CH), 130.1 (C), 129.6 (CH), 129.3 (CH), 129.1 (CH), 127.4 (CH), 127.2 (CH), 125.4 (C), 124.7 (C), 124.3 (C), 124.2 (CH), 123.8 (CH), 121.8 (CH), 121.6 (CH), 97.8 (CH), 36.7 (CH<sub>3</sub>). HRMS (ESI) *m/z*: 309.1388 calcd for C<sub>22</sub>H<sub>17</sub>N<sub>2</sub><sup>+</sup> [M – I]<sup>+</sup>, found 309.1397.

## REFERENCES

1. Hortmann, A.G.; Robertson, D. A.; Gillard, B. K. *J. Org. Chem.*, **1972**, *37*, 322–324. doi:10.1021/jo00967a033
2. Funt, L. D.; Tomashenko, O. A.; Novikov, M. S.; Khlebnikov, A. F. *Synthesis* **2018**, *50*, 4809–4822. doi:10.1055/s-0037-1610840
3. Basnet, A.; Thapa, P.; Karki, R.; Na, Y.; Jahng, Y.; Jeong, B.; Jeong, T.; Lee, J.; Lee, E. *Bioorg. Med. Chem.* **2007**, *15*, 4351–4359. doi:10.1016/j.bmc.2007.04.047
4. Tomashenko, O. A.; Khlebnikov, A. F.; Mosiagin, I. P.; Novikov, M. S.; Grachova, E. V.; Shakirova, J. R.; Tunik, S. P. *RSC Adv.* **2015**, *5*, 94551–94561. doi:10.1039/C5RA17755C

5. Porras, J. A.; Mills, I. N.; Transue, Wesley J.; Bernhard, S. *J. Am. Chem. Soc.* **2016**, *138*, 9460–9472. doi:10.1021/jacs.6b03246
6. He, X.; Li, R.; Choy, P. Y.; Liu, T.; Wang, J.; Yuen, O. Y.; Leung, M. P.; Shang, Y.; Kwong, F. Y. *Org. Lett.* **2020**, *22*, 9444–9449. doi:10.1021/acs.orglett.0c03374
7. Ferlin, M. G.; Chiarello, G.; Malesani, G. *J. Heterocyc. Chem.* **1989**, *26*, 245–249. doi:10.1002/jhet.5570260144
8. Hu, R.-B.; Sun, S.; Su, Y. *Angew. Chem. Int. Ed.* **2017**, *56*, 10877–10880. doi:10.1002/anie.201704385
9. Szafran, M.; Szwajca, A. *Polish J. Chem.*; **2004**, *78*, 2131–2140.
10. Szwajca, A.; Katrusiak, A.; Szafran, M. *J. Mol. Str.* **2004**, *705*, 159–165. doi:10.1016/j.molstruc.2004.06.015
11. Castillo, R. R.; Burgos, C.; Vaquero, J. J.; Alvarez-Builla, J. *Eur. J. Org. Chem.*, **2011**, 619–628. doi.org:10.1002/ejoc.201001071

$^1\text{H}$  NMR (400 MHz,  $\text{DMSO-}d_6$ ) of 1-(1-benzyl-4-(2-bromophenyl)-2-phenyl-1*H*-pyrrol-3-yl)pyridin-1-ium bromide (N-Bn-1a)

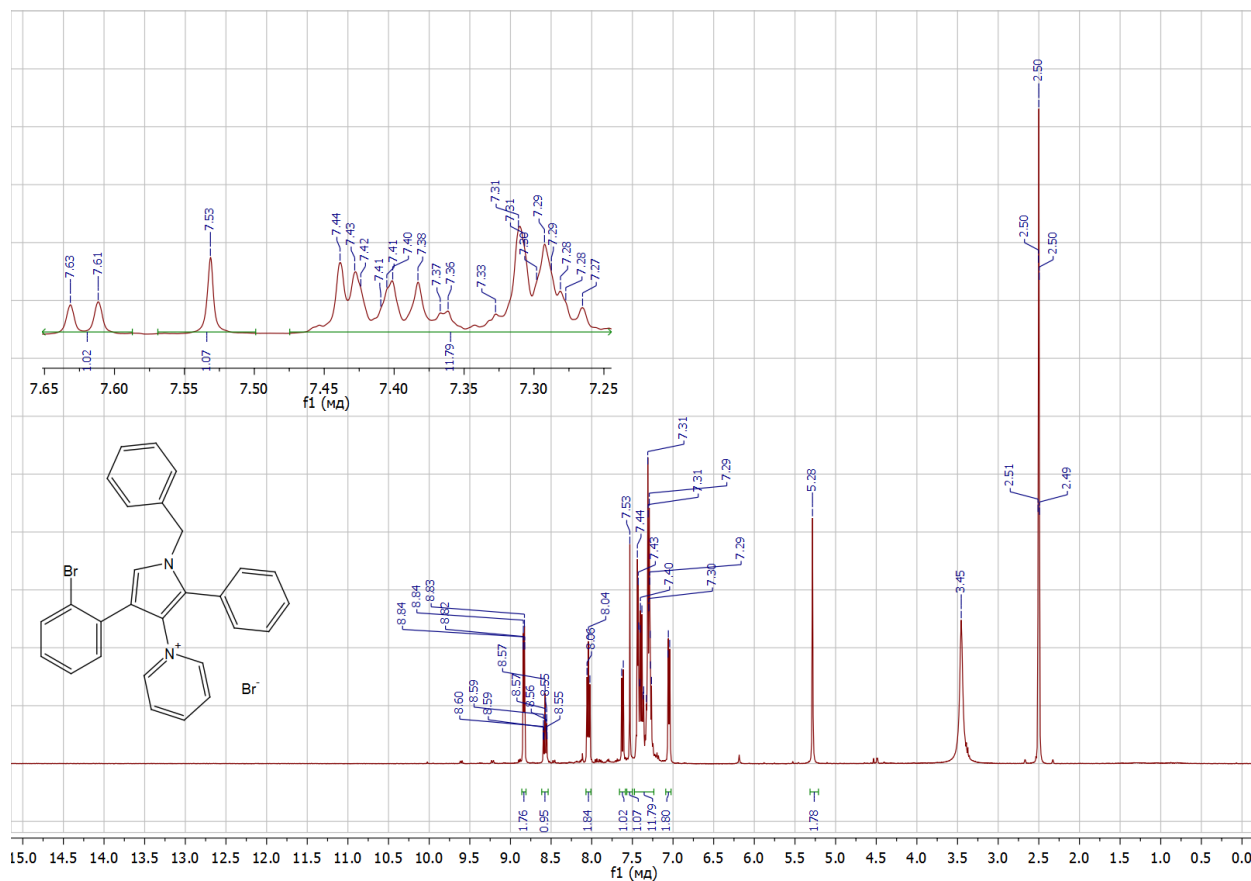

$^{13}\text{C}\{^1\text{H}\}$  NMR (101 MHz,  $\text{DMSO-}d_6$ ) of 1-(1-benzyl-4-(2-bromophenyl)-2-phenyl-1*H*-pyrrol-3-yl)pyridin-1-ium bromide (N-Bn-1a)

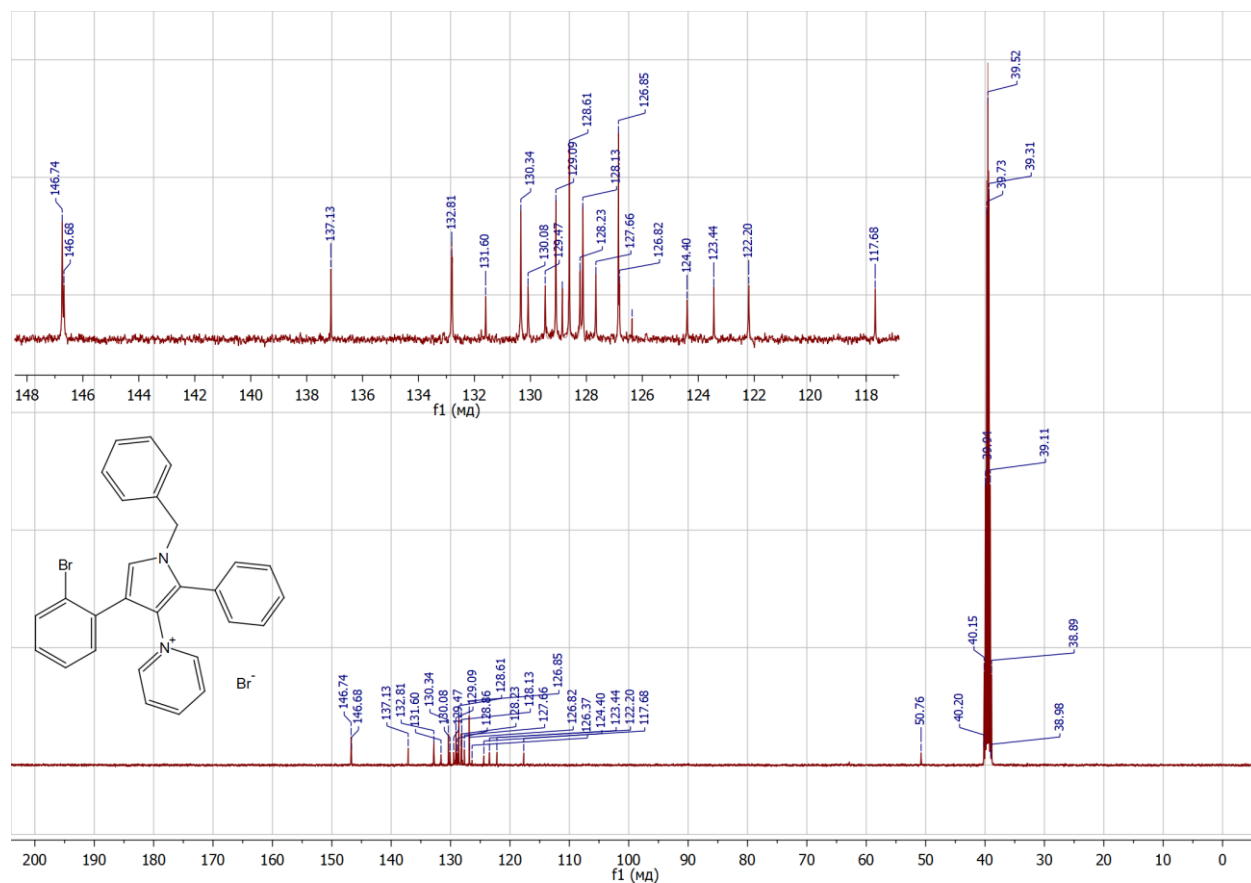

Chemical structure of 1-benzyl-2-benzyl-3-(3-bromophenyl)pyrrolidinium bromide is shown. The  $^{13}\text{C}$  NMR spectrum displays two regions: a top region (125-134 MHz) and a bottom region (0-190 MHz). The top region shows peaks at 132.82, 132.79, 130.34, 130.08, 129.47, 129.09, 128.61, 128.22, 128.12, 127.66, and 126.85 MHz. The bottom region shows peaks at 146.67, 146.74, 132.82, 132.80, 130.08, 129.47, 128.22, 127.66, 122.19, 39.95, 39.55, 39.35, and 39.26 MHz.



$^1\text{H}$  NMR (400 MHz,  $\text{DMSO}-d_6$ ) of 1-(1-acetyl-4-(2-bromophenyl)-2-phenyl-1*H*-pyrrol-3-yl)pyridin-1-ium chloride (N-Ac-**1a**)

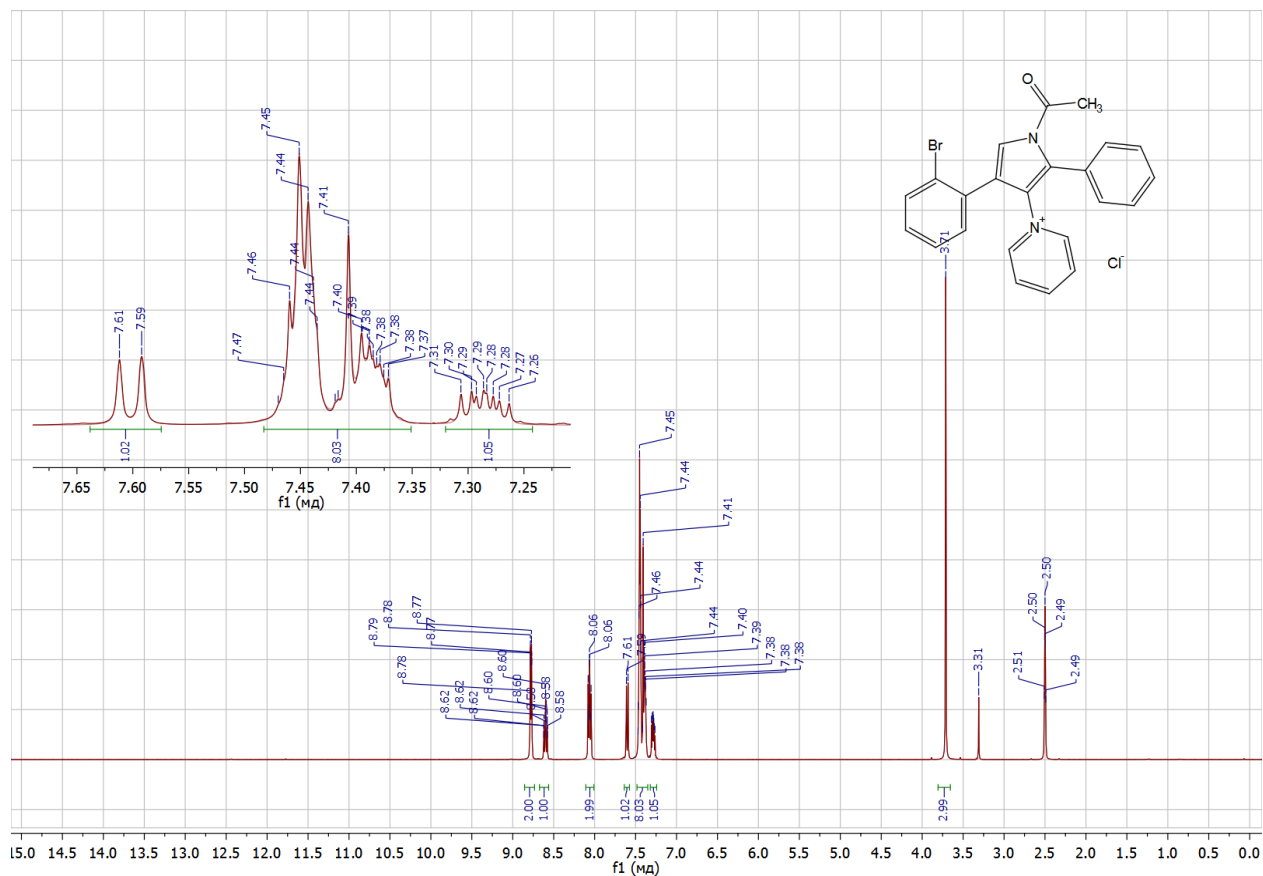

$^{13}\text{C}\{^1\text{H}\}$  NMR (101 MHz,  $\text{DMSO}-d_6$ ) of 1-(1-acetyl-4-(2-bromophenyl)-2-phenyl-1*H*-pyrrol-3-yl)pyridin-1-ium chloride (N-Ac-**1a**)

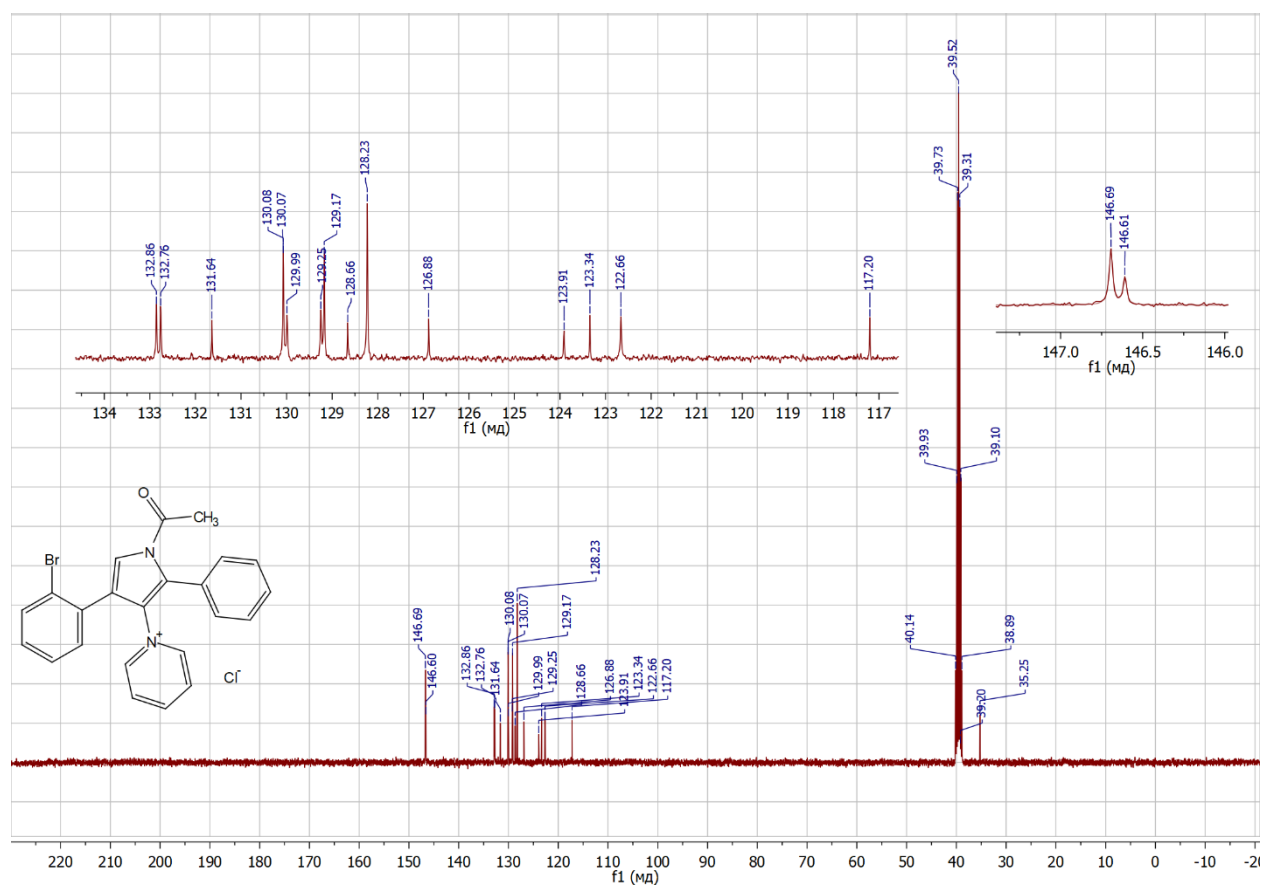

$^{13}\text{C}$  DEPT135 NMR (101 MHz,  $\text{DMSO-}d_6$ ) of 1-(1-acetyl-4-(2-bromophenyl)-2-phenyl-1*H*-pyrrol-3-yl)pyridin-1-ium chloride (N-Ac-**1a**)

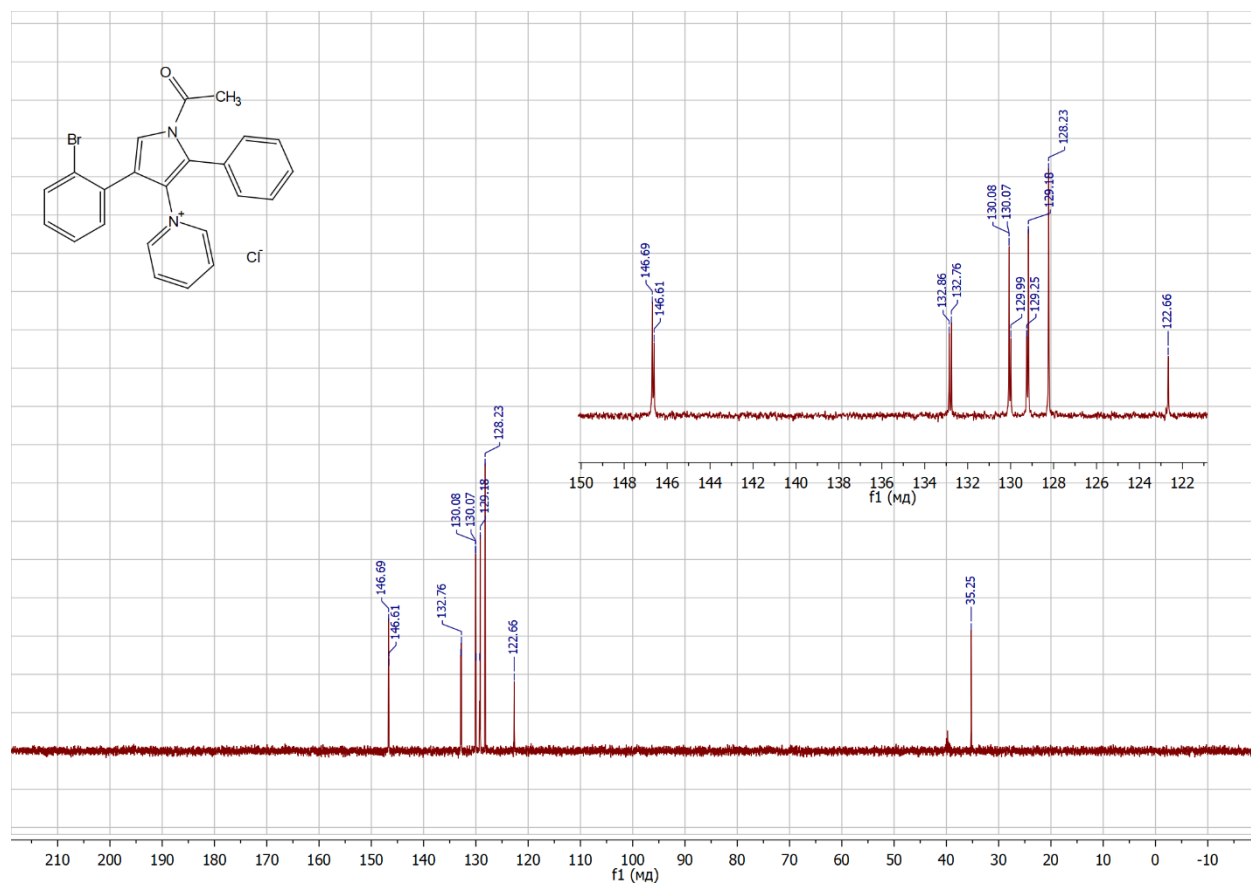

$^1\text{H}$  NMR (400 MHz,  $\text{DMSO}-d_6$ ) of 1-(4-(2-bromophenyl)-2-(4-fluorophenyl)-1*H*-pyrrol-3-yl)pyridin-1-ium bromide (**1b**)

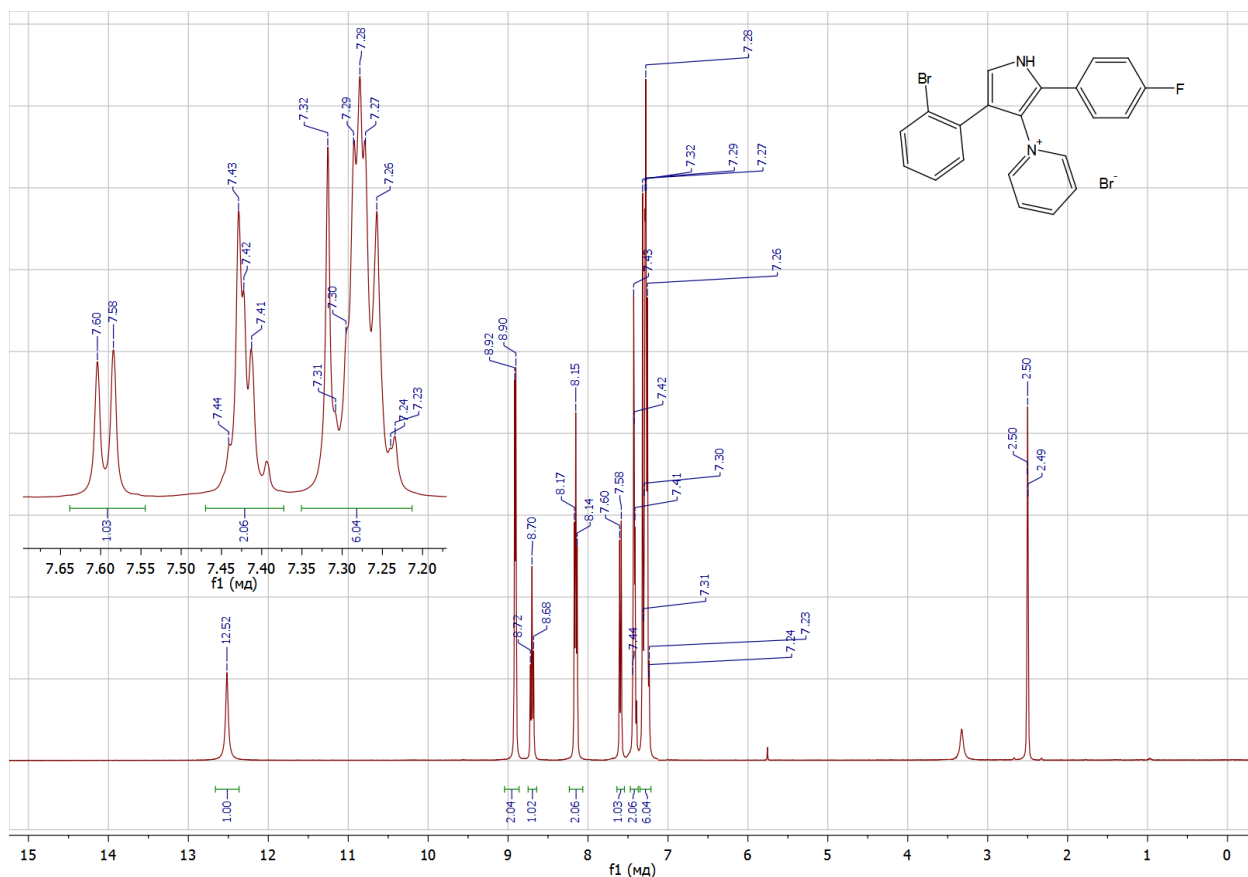

$^{13}\text{C}\{^1\text{H}\}$  NMR (101 MHz,  $\text{DMSO}-d_6$ ) of 1-(4-(2-bromophenyl)-2-(4-fluorophenyl)-1*H*-pyrrol-3-yl)pyridin-1-ium bromide (**1b**)

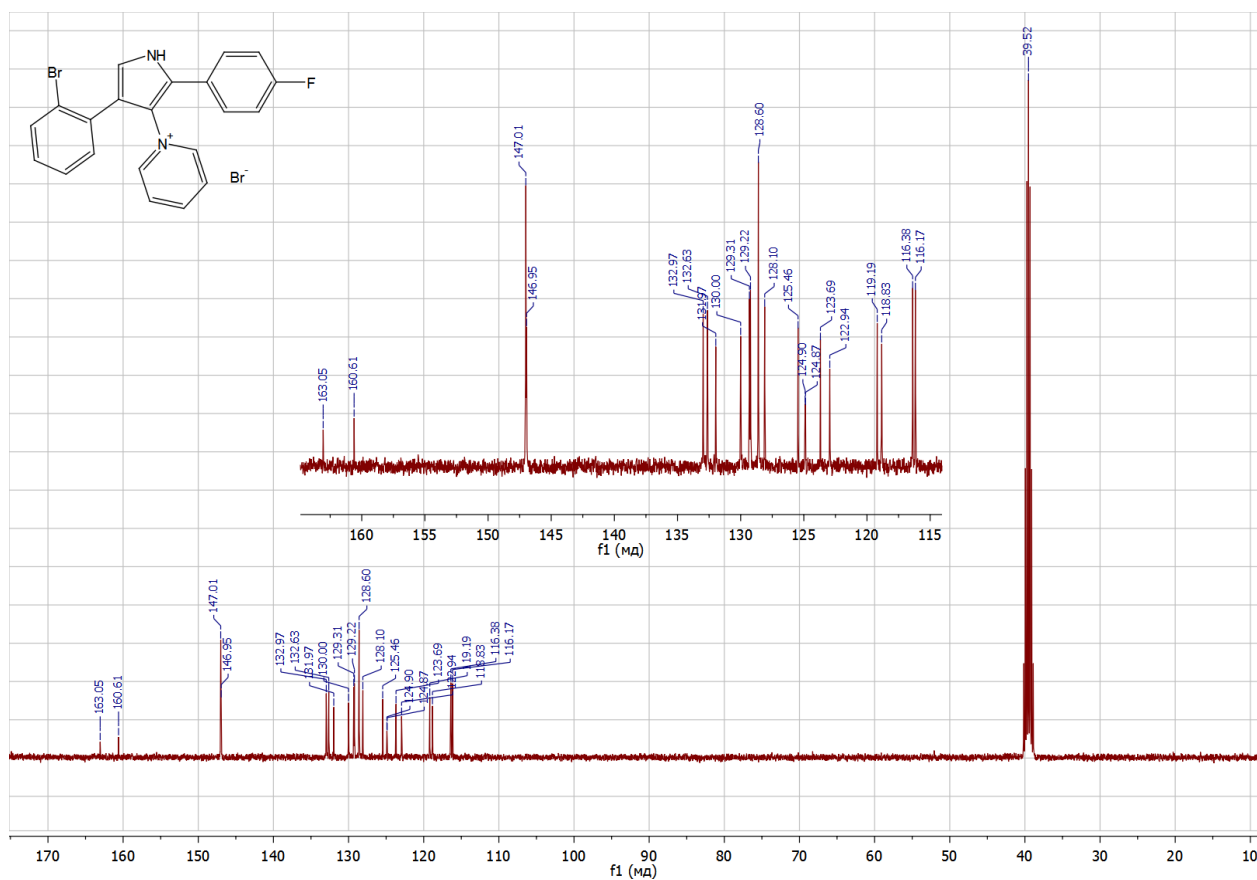

$^{13}\text{C}$  DEPT135 NMR (101 MHz,  $\text{DMSO-}d_6$ ) of 1-(4-(2-bromophenyl)-2-(4-fluorophenyl)-1*H*-pyrrol-3-yl)pyridin-1-ium bromide (**1b**)

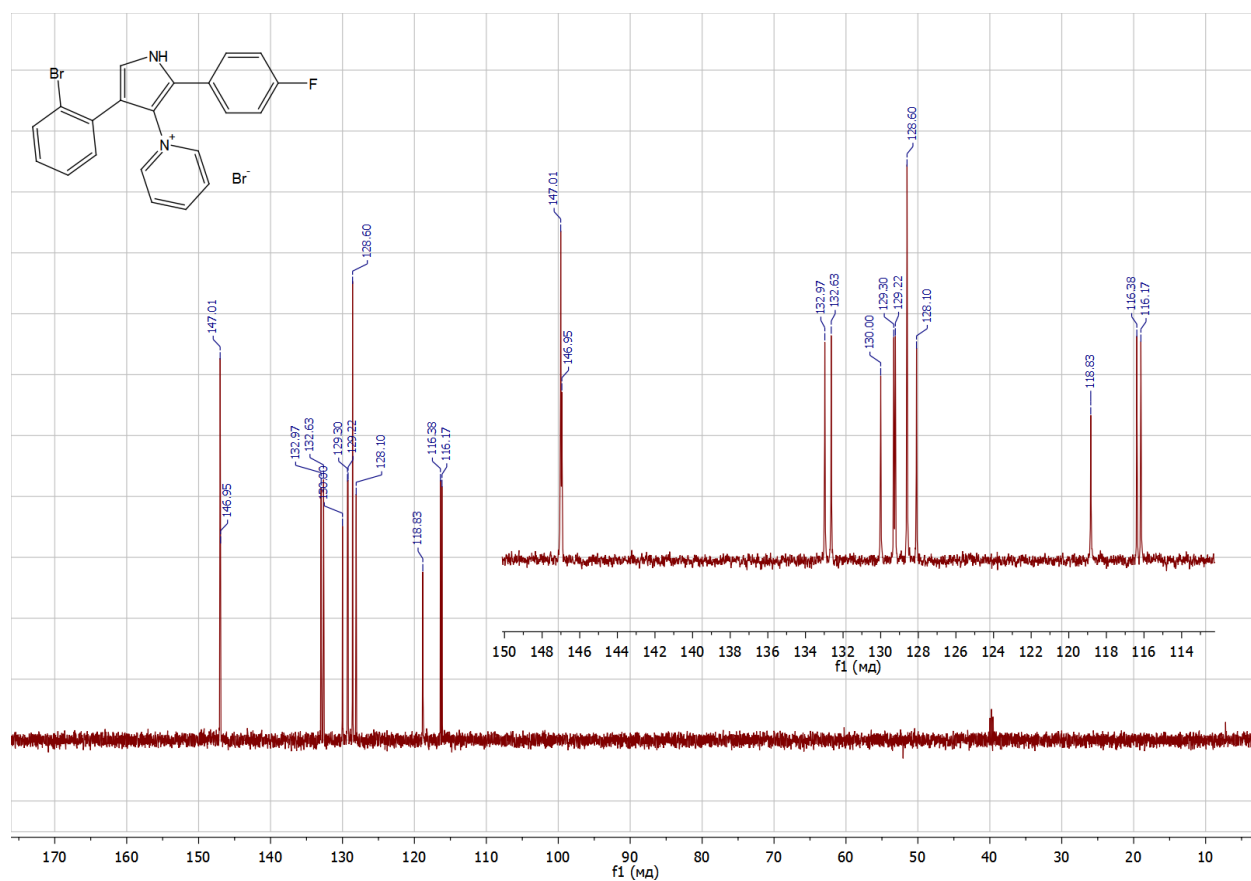

$^1\text{H}$  NMR (400 MHz,  $\text{DMSO}-d_6$ ) of 1-(4-(2-bromophenyl)-2-(4-chlorophenyl)-1*H*-pyrrol-3-yl)pyridin-1-ium bromide (**1c**)

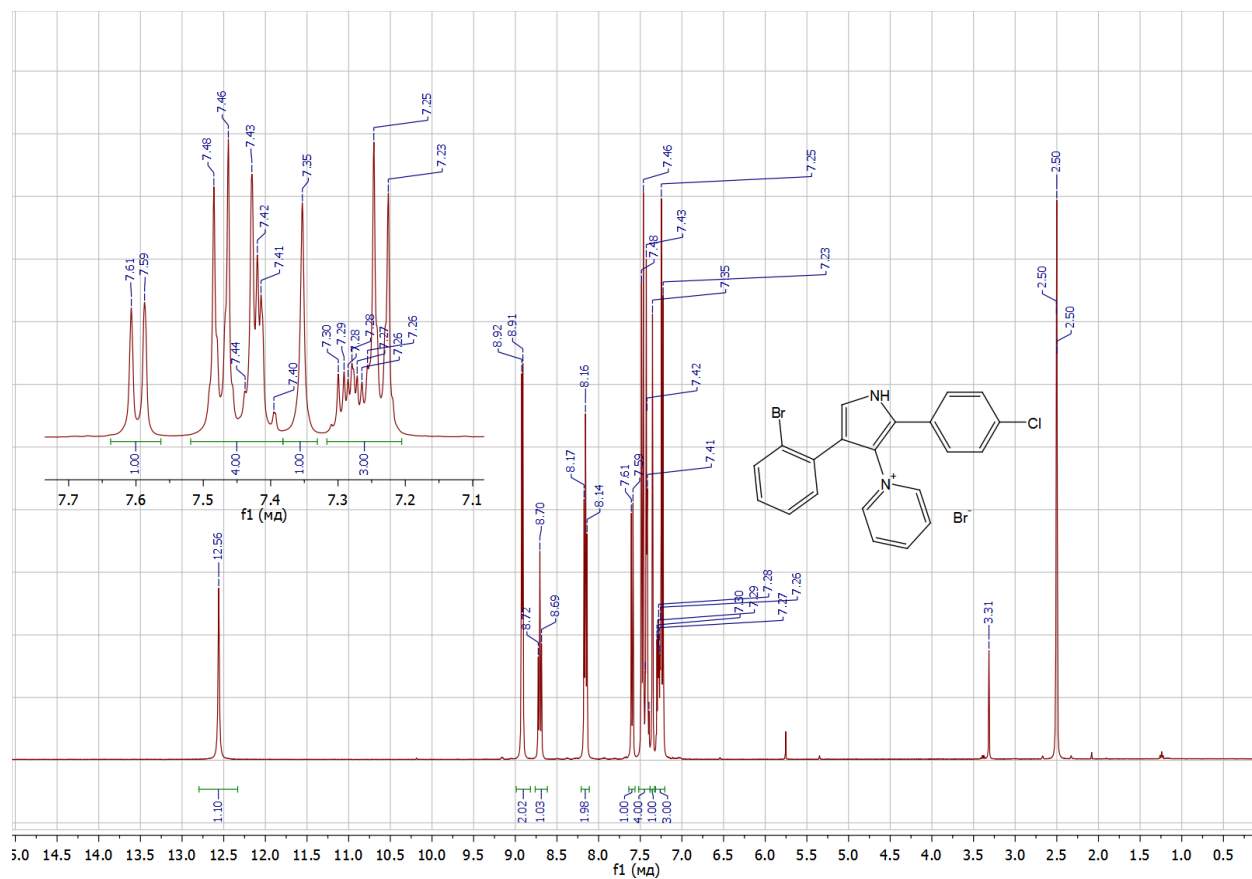

$^{13}\text{C}\{^1\text{H}\}$  NMR (101 MHz,  $\text{DMSO}-d_6$ ) of 1-(4-(2-bromophenyl)-2-(4-chlorophenyl)-1*H*-pyrrol-3-yl)pyridin-1-ium bromide (**1c**)

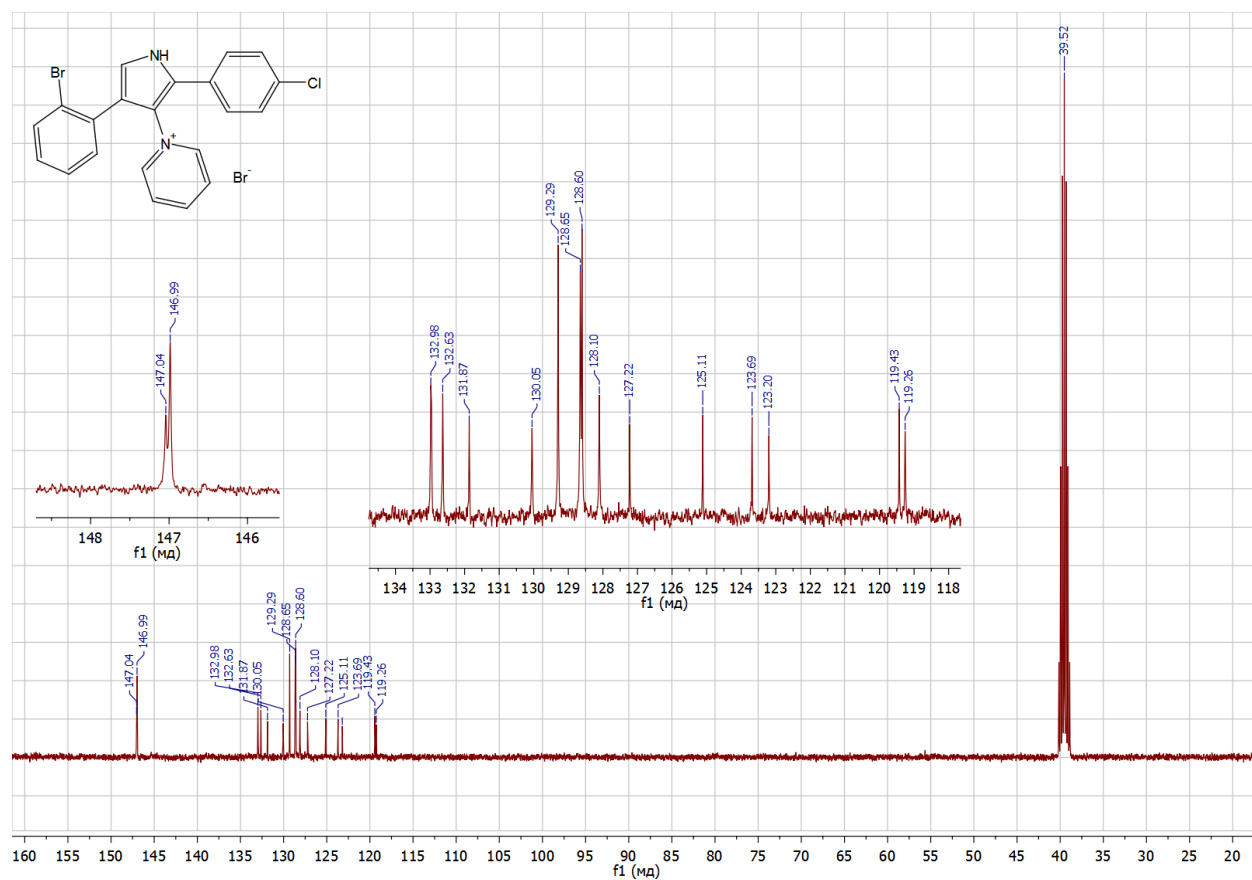

$^{13}\text{C}$  DEPT135 NMR (101 MHz,  $\text{DMSO-}d_6$ ) of 1-(4-(2-bromophenyl)-2-(4-chlorophenyl)-1*H*-pyrrol-3-yl)pyridin-1-ium bromide (**1c**)

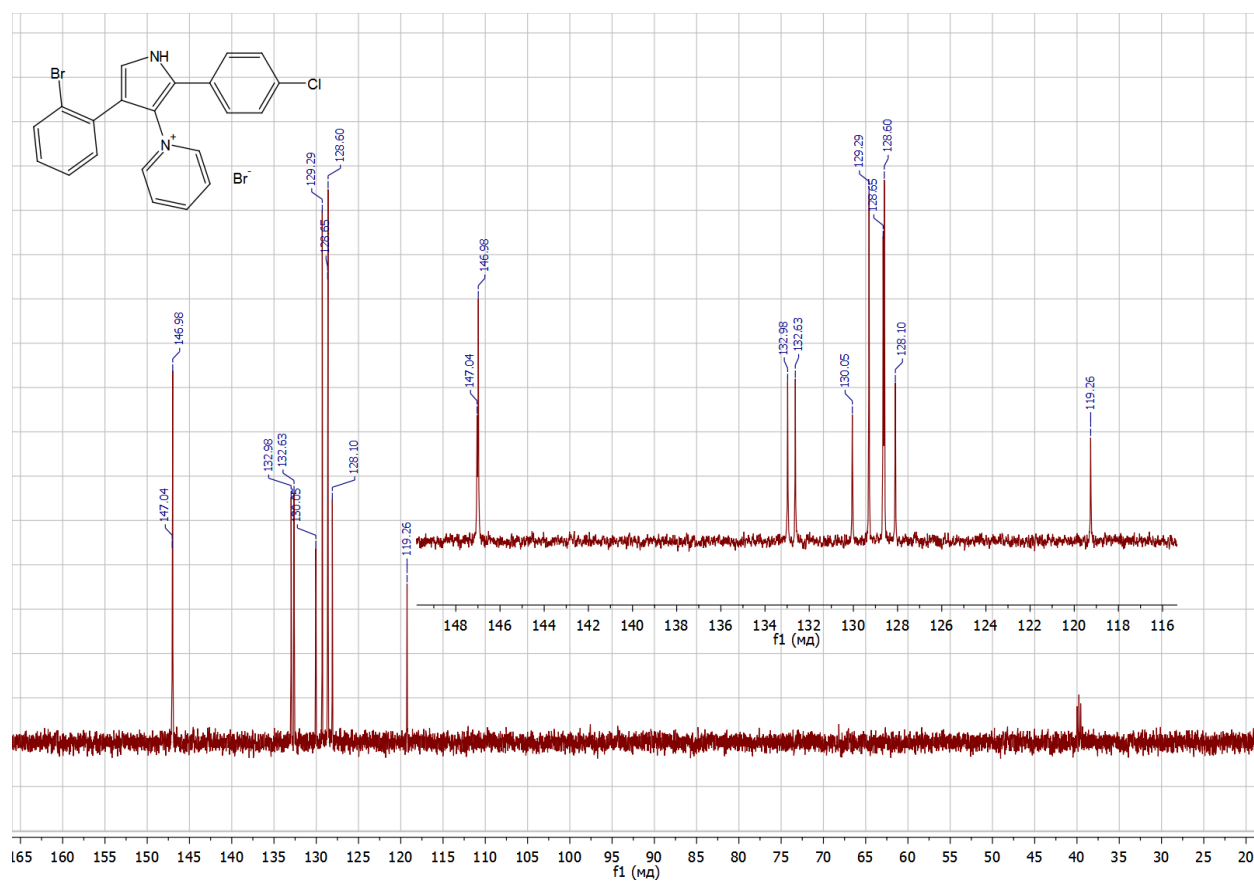

$^1\text{H}$  NMR (400 MHz,  $\text{DMSO-}d_6$ ) of 1-(4-(2-bromophenyl)-2-(4-bromophenyl)-1*H*-pyrrol-3-yl)pyridin-1-ium bromide (**1d**)

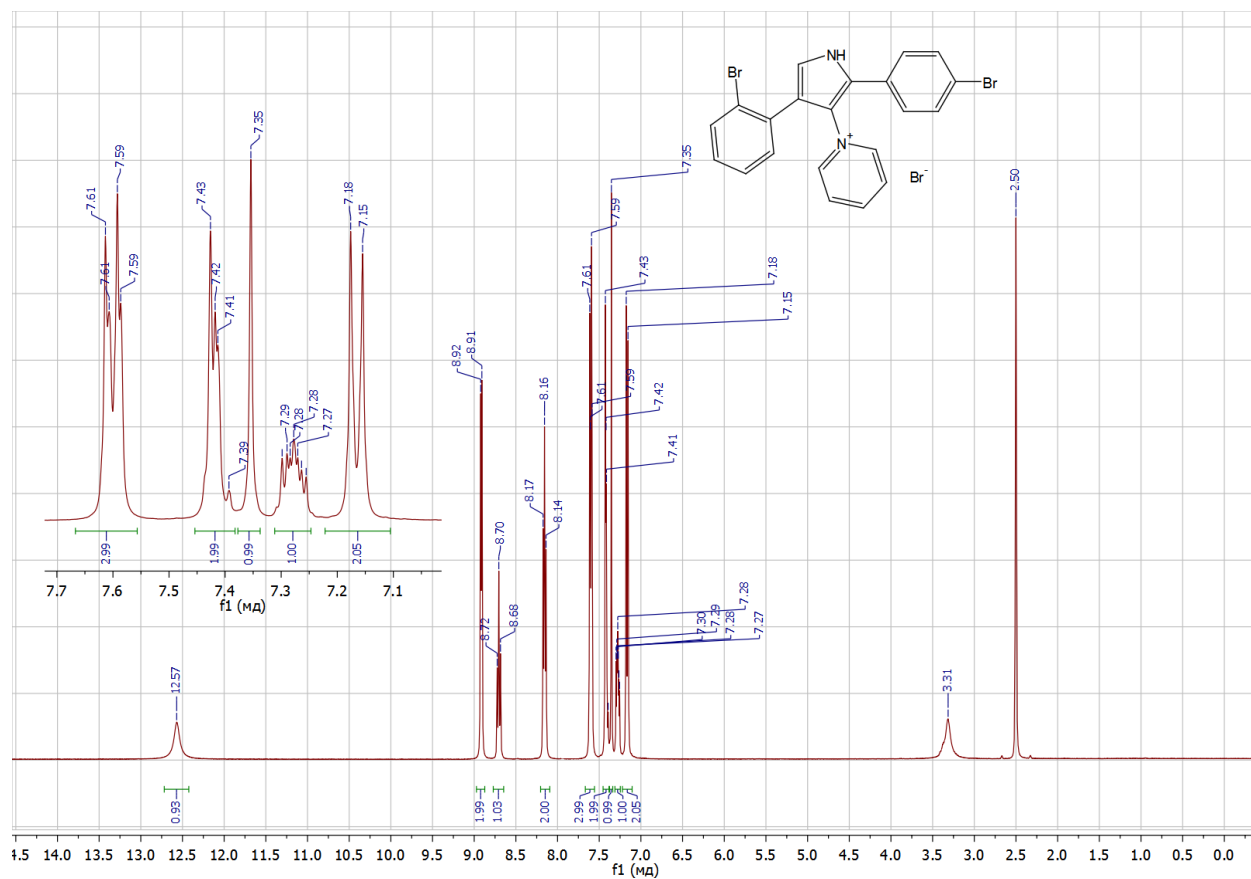

$^{13}\text{C}\{^1\text{H}\}$  NMR (101 MHz,  $\text{DMSO-}d_6$ ) of 1-(4-(2-bromophenyl)-2-(4-bromophenyl)-1*H*-pyrrol-3-yl)pyridin-1-ium bromide (**1d**)

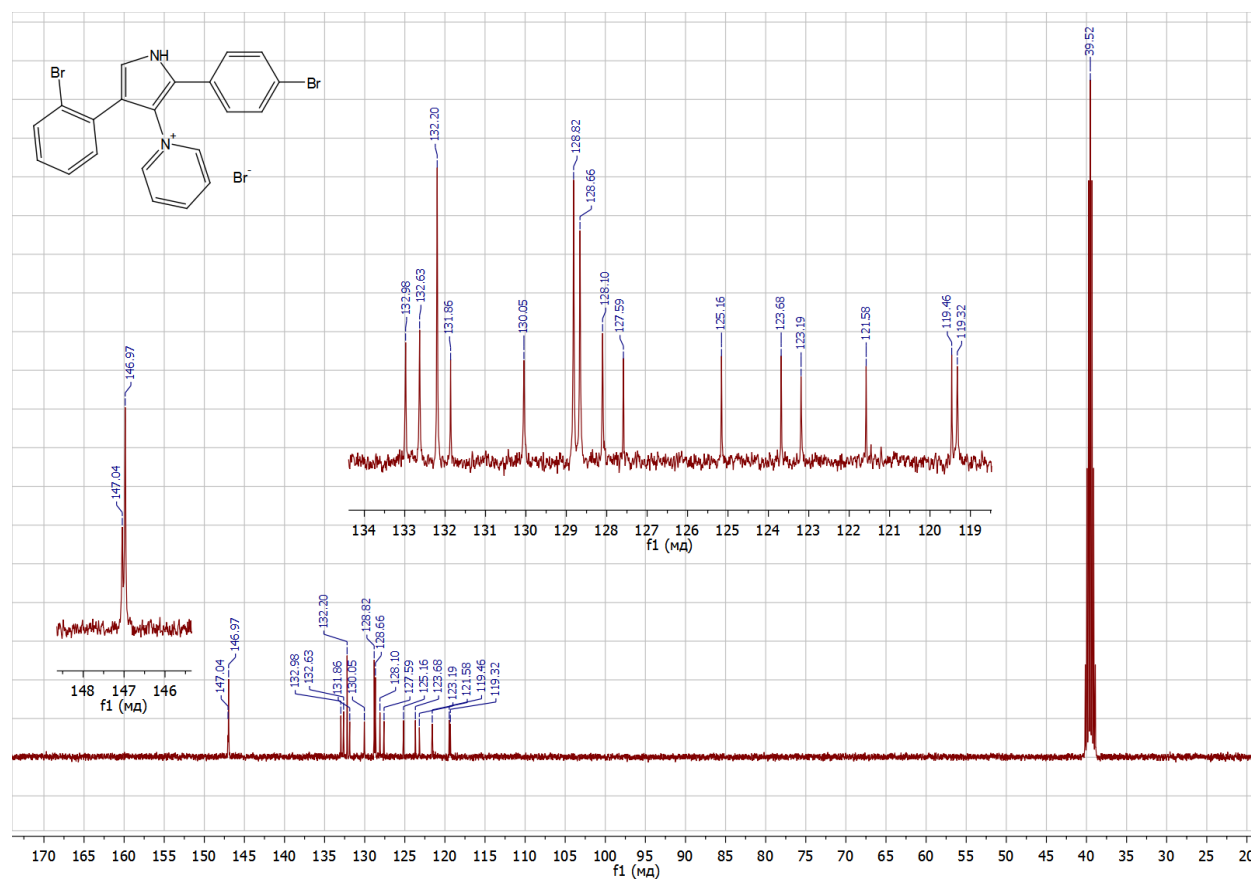

$^{13}\text{C}$  DEPT135 NMR (101 MHz,  $\text{DMSO}-d_6$ ) of 1-(4-(2-bromophenyl)-2-(4-bromophenyl)-1*H*-pyrrol-3-yl)pyridin-1-ium bromide (**1d**)

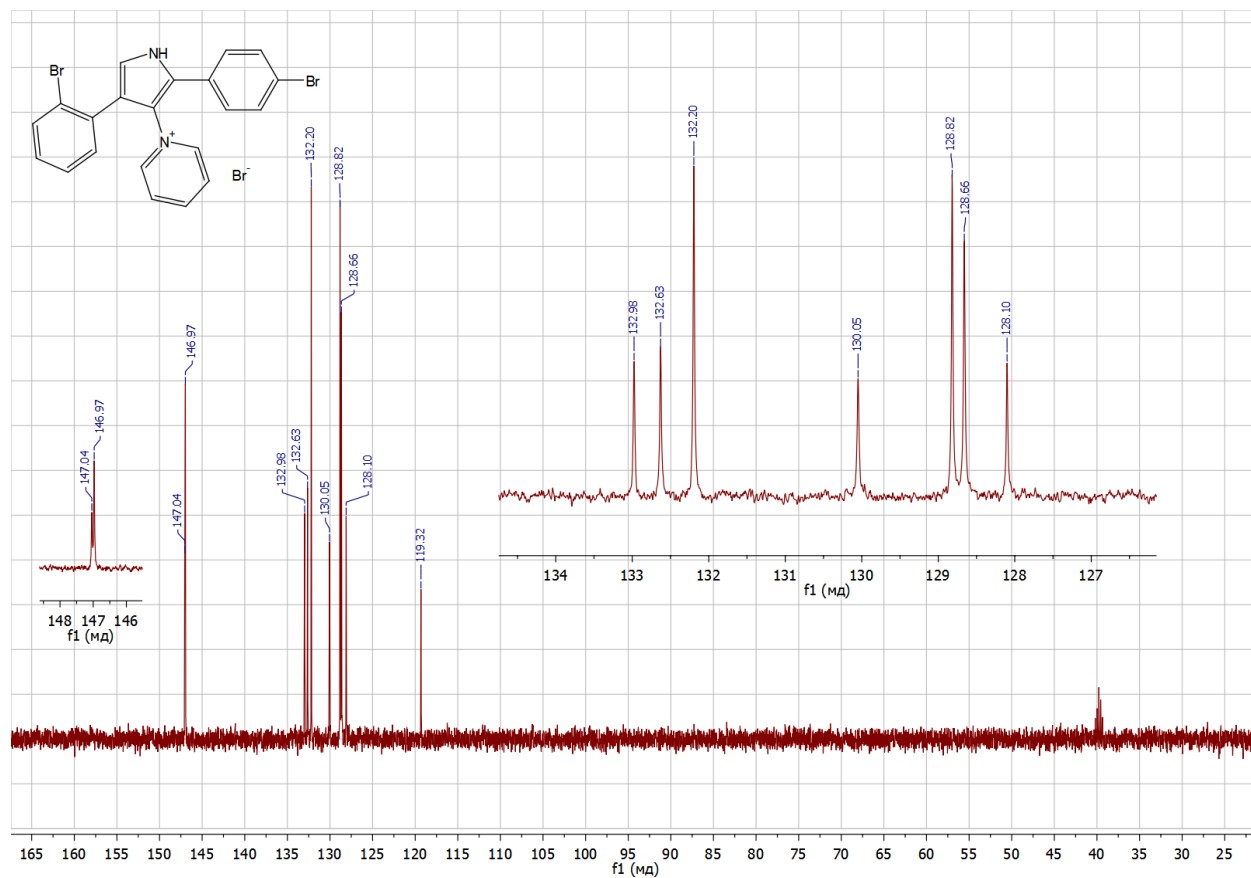



$^1\text{H}$  NMR (400 MHz,  $\text{DMSO}-d_6$ ) of 1-(4-(2-bromophenyl)-2-(4-methylphenyl)-1*H*-pyrrol-3-yl)pyridin-1-ium bromide (**1e**)

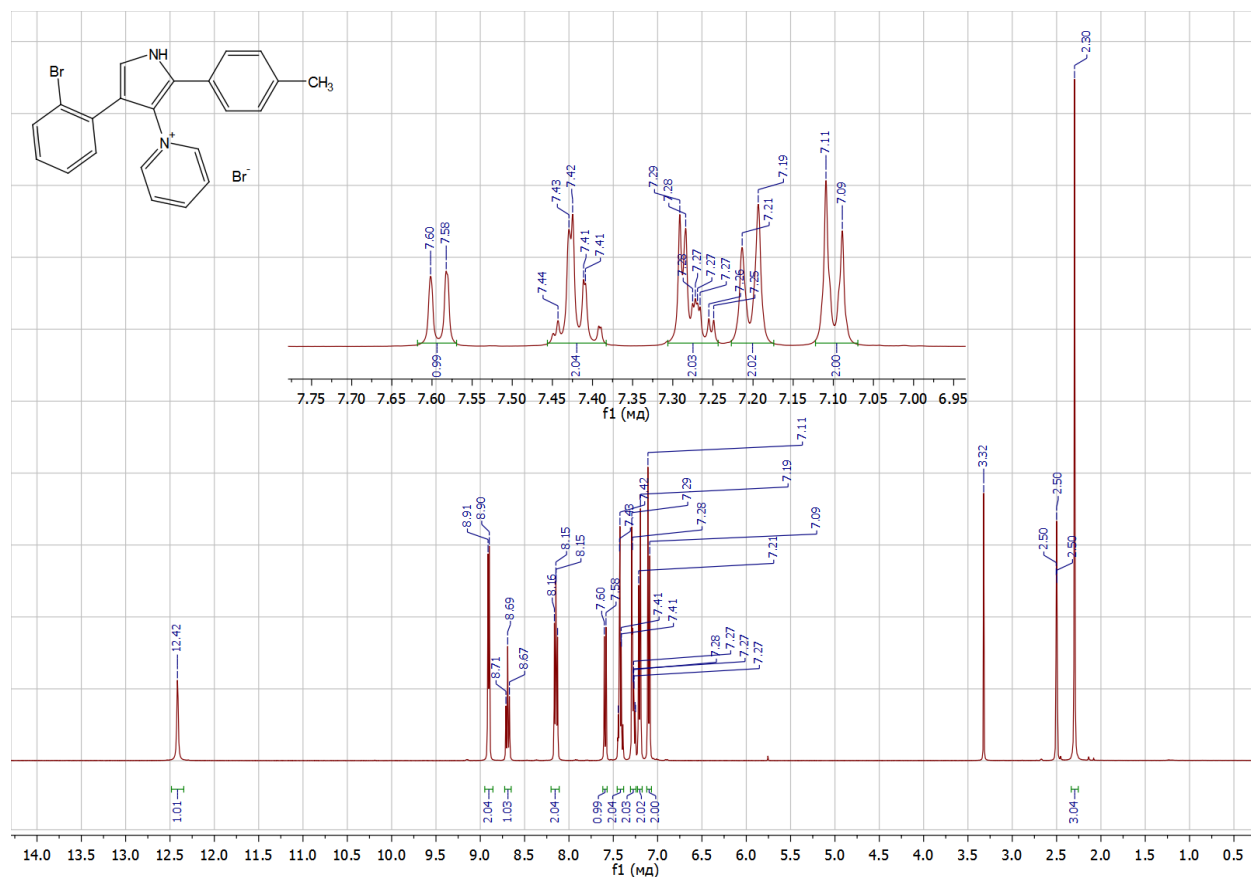

$^{13}\text{C}\{^1\text{H}\}$  NMR (101 MHz,  $\text{DMSO}-d_6$ ) of 1-(4-(2-bromophenyl)-2-(4-methylphenyl)-1*H*-pyrrol-3-yl)pyridin-1-ium bromide (**1e**)

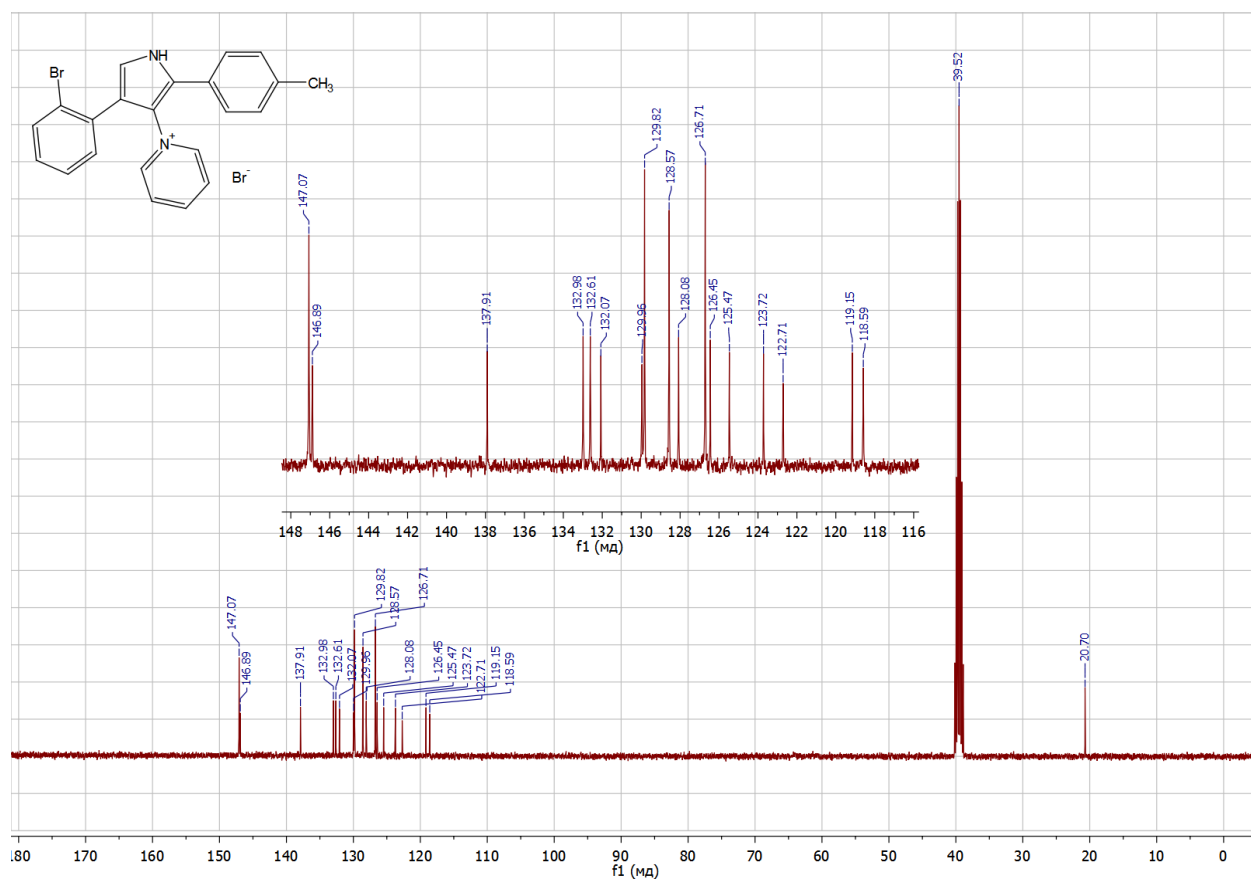

$^{13}\text{C}$  DEPT135 NMR (101 MHz,  $\text{DMSO-}d_6$ ) of 1-(4-(2-bromophenyl)-2-(4-methylphenyl)-1*H*-pyrrol-3-yl)pyridin-1-ium bromide (**1e**)

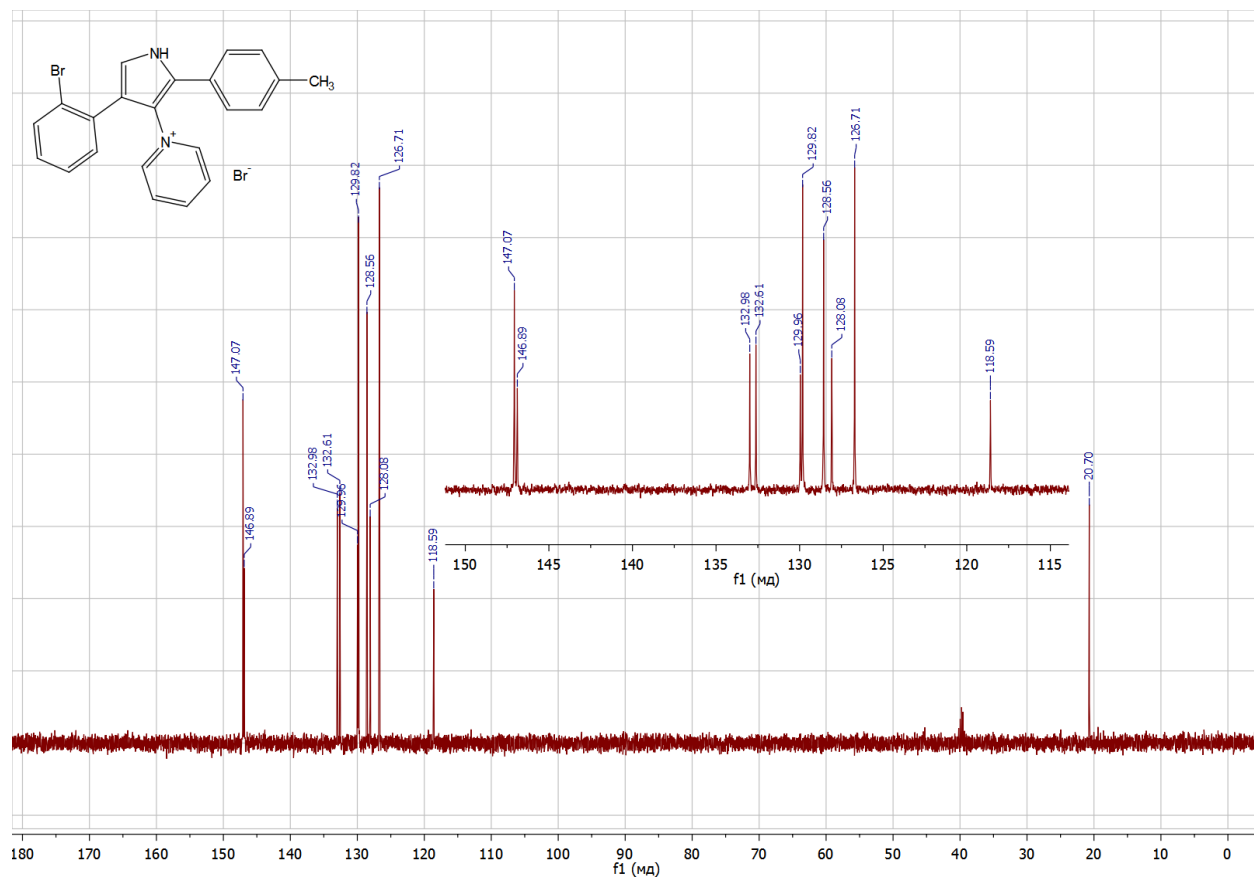

$^1\text{H}$  NMR (400 MHz,  $\text{DMSO}-d_6$ ) of 1-(4-(2-bromophenyl)-2-(4-methoxyphenyl)-1*H*-pyrrol-3-yl)pyridin-1-ium bromide (**1f**)

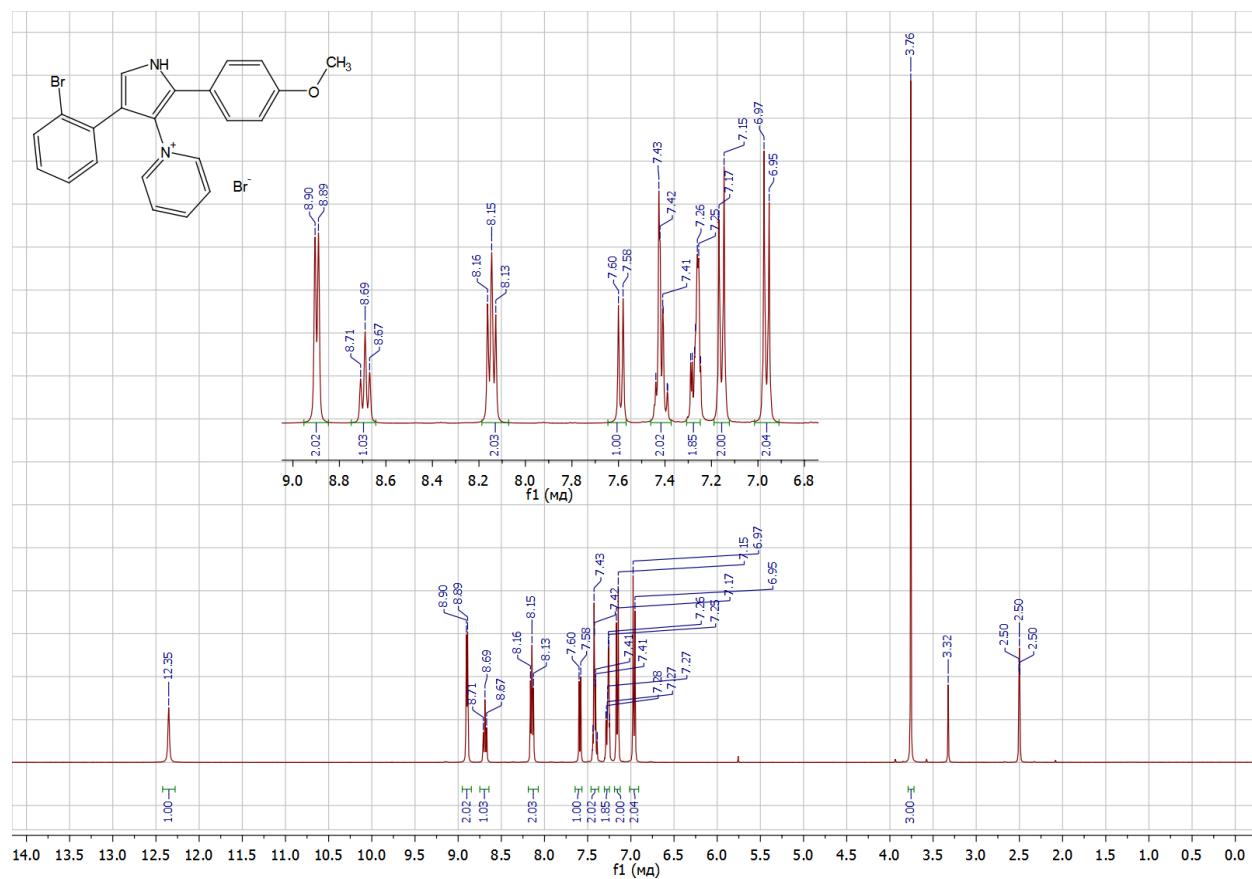

$^{13}\text{C}\{^1\text{H}\}$  NMR (101 MHz,  $\text{DMSO}-d_6$ ) of 1-(4-(2-bromophenyl)-2-(4-methoxyphenyl)-1*H*-pyrrol-3-yl)pyridin-1-ium bromide (**1f**)

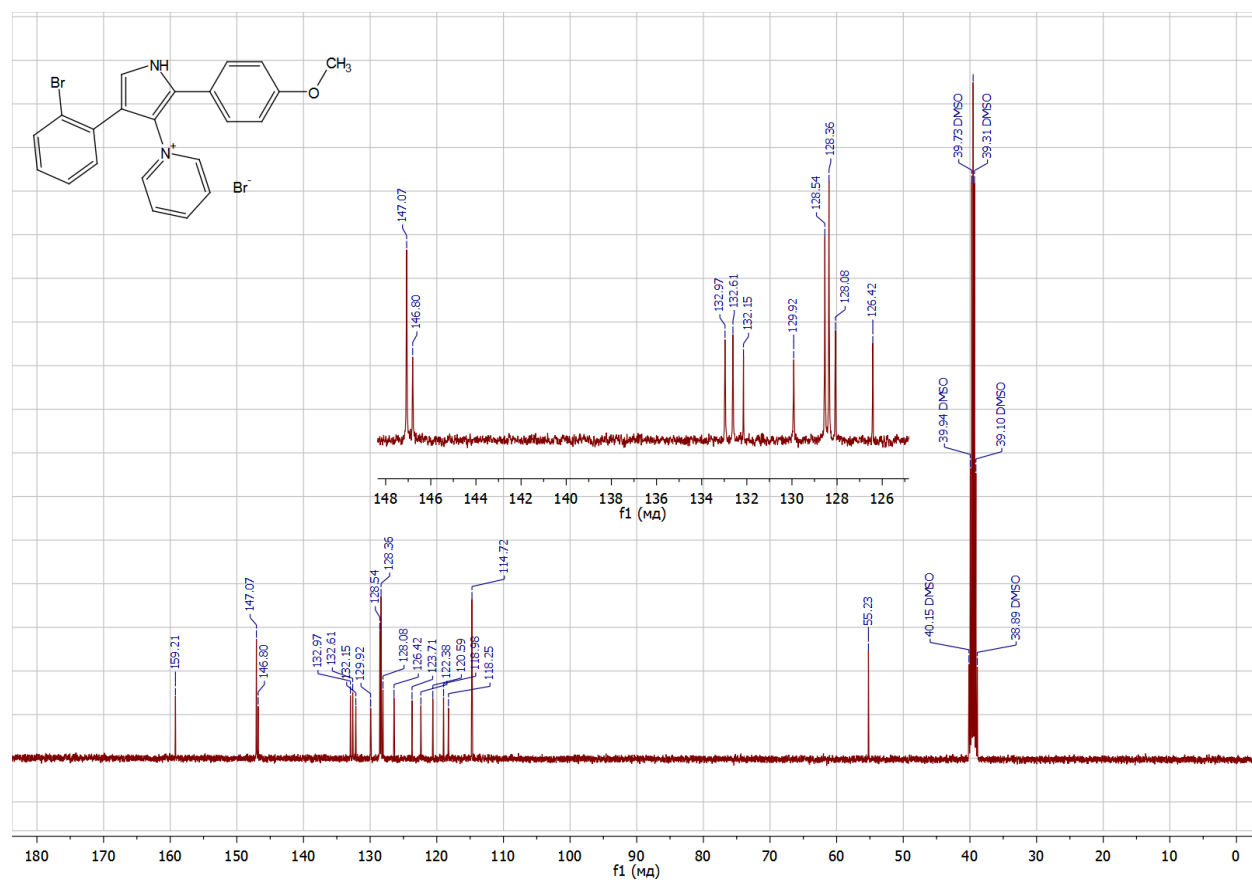

$^{13}\text{C}$  DEPT135 NMR (101 MHz,  $\text{DMSO-}d_6$ ) of 1-(4-(2-bromophenyl)-2-(4-methoxyphenyl)-1*H*-pyrrol-3-yl)pyridin-1-ium bromide (**1f**)

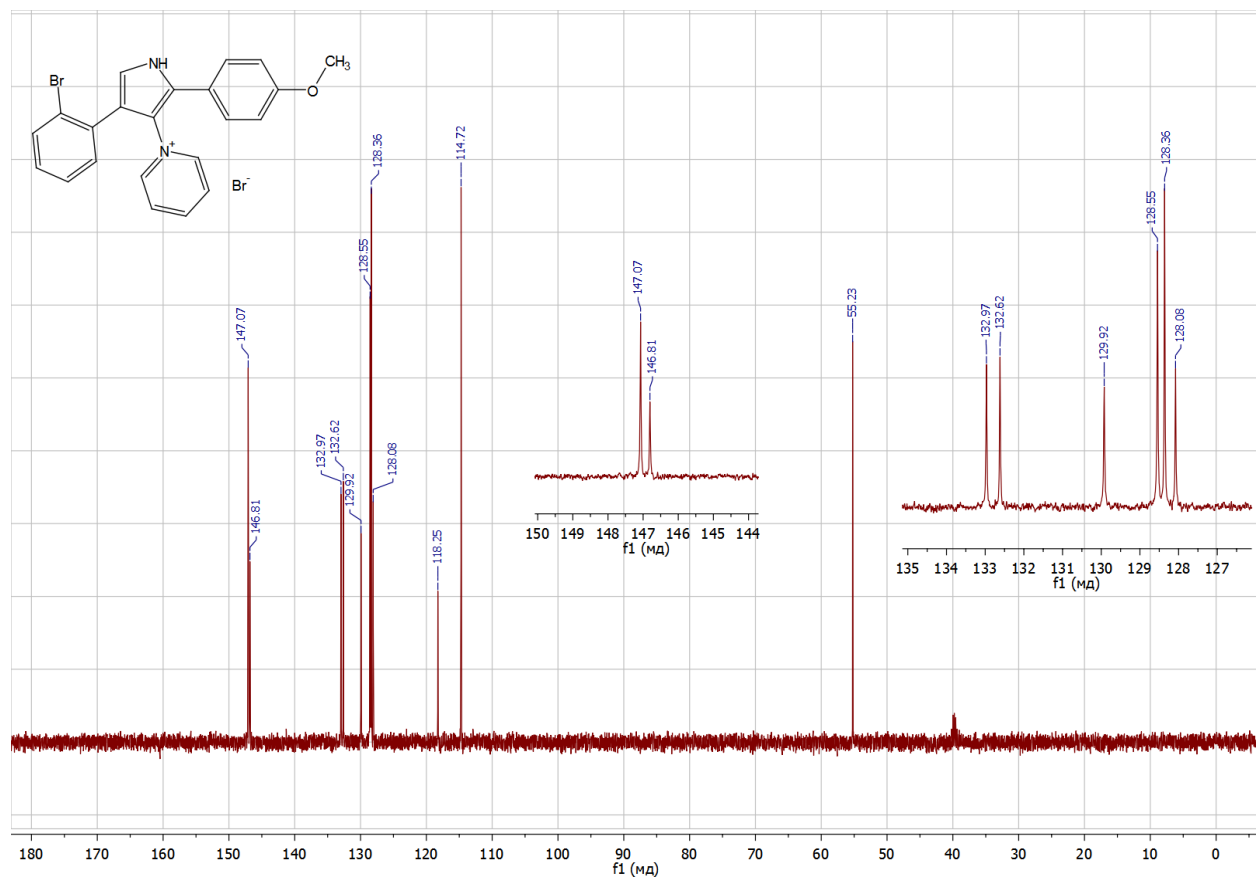

$^1\text{H}$  NMR (400 MHz,  $\text{DMSO}-d_6$ ) of 1-(4-(2-bromophenyl)-2-(2-methoxyphenyl)-1*H*-pyrrol-3-yl)pyridin-1-ium bromide (**1g**)

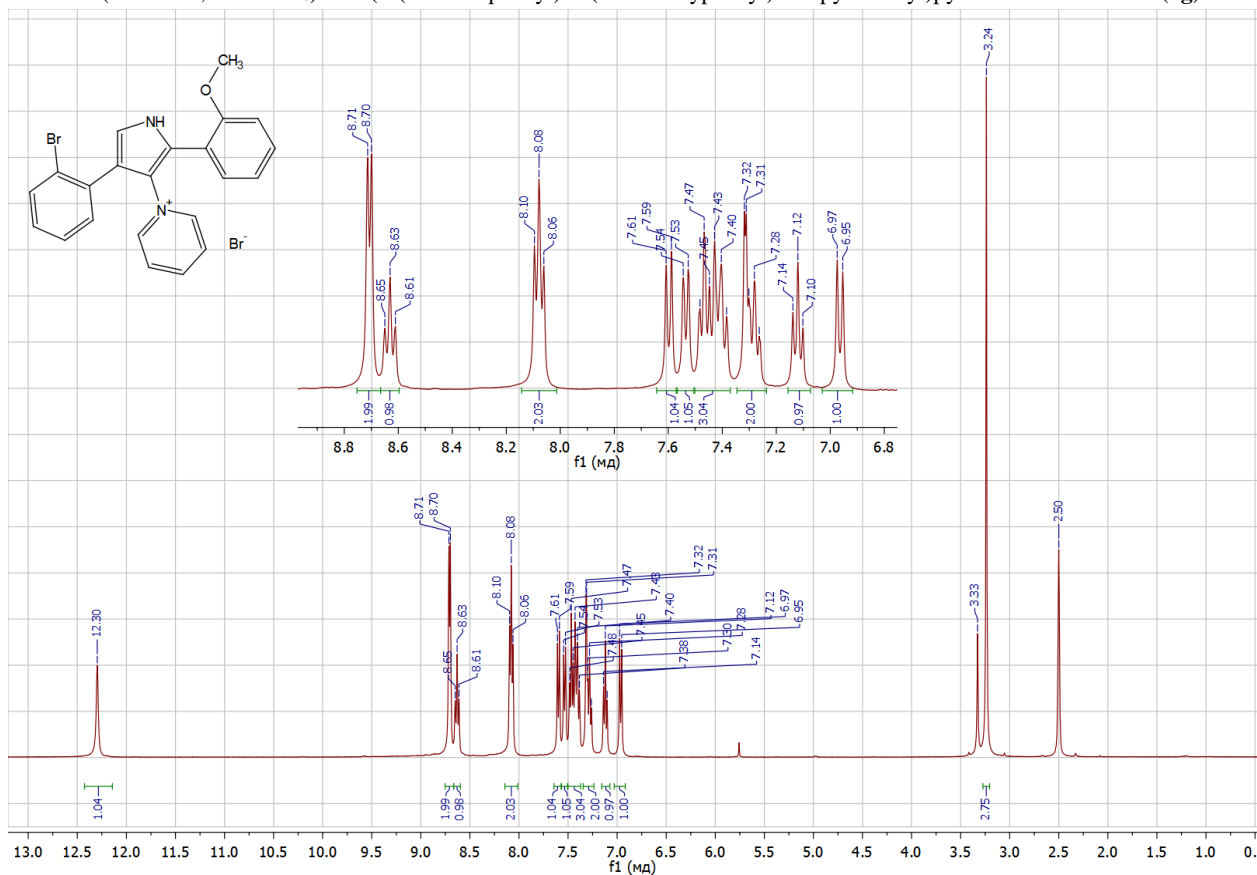

$^{13}\text{C}\{^1\text{H}\}$  NMR (101 MHz,  $\text{DMSO}-d_6$ ) of 1-(4-(2-bromophenyl)-2-(2-methoxyphenyl)-1*H*-pyrrol-3-yl)pyridin-1-ium bromide (**1g**)

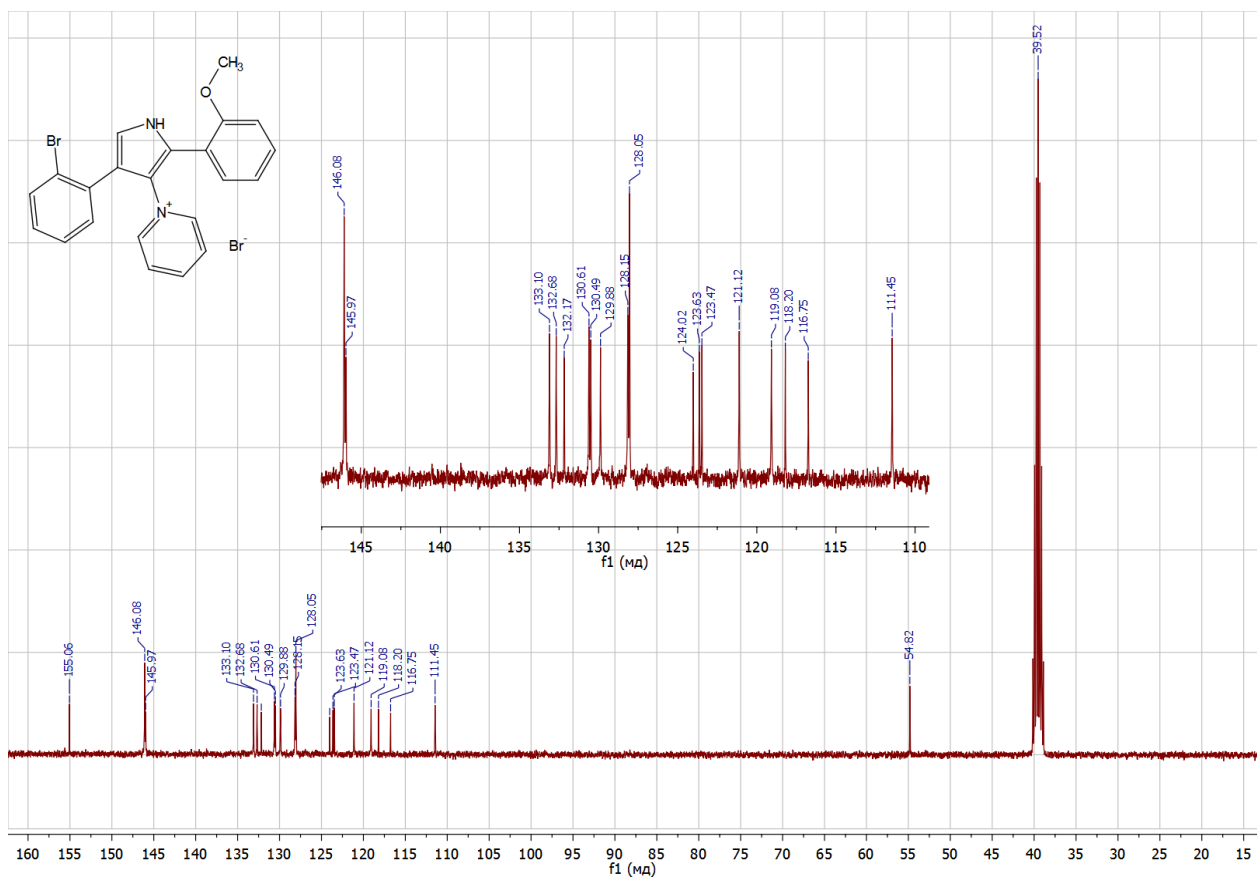

$^{13}\text{C}$  DEPT135 NMR (101 MHz,  $\text{DMSO-}d_6$ ) of 1-(4-(2-bromophenyl)-2-(2-methoxyphenyl)-1*H*-pyrrol-3-yl)pyridin-1-ium bromide (**1g**)

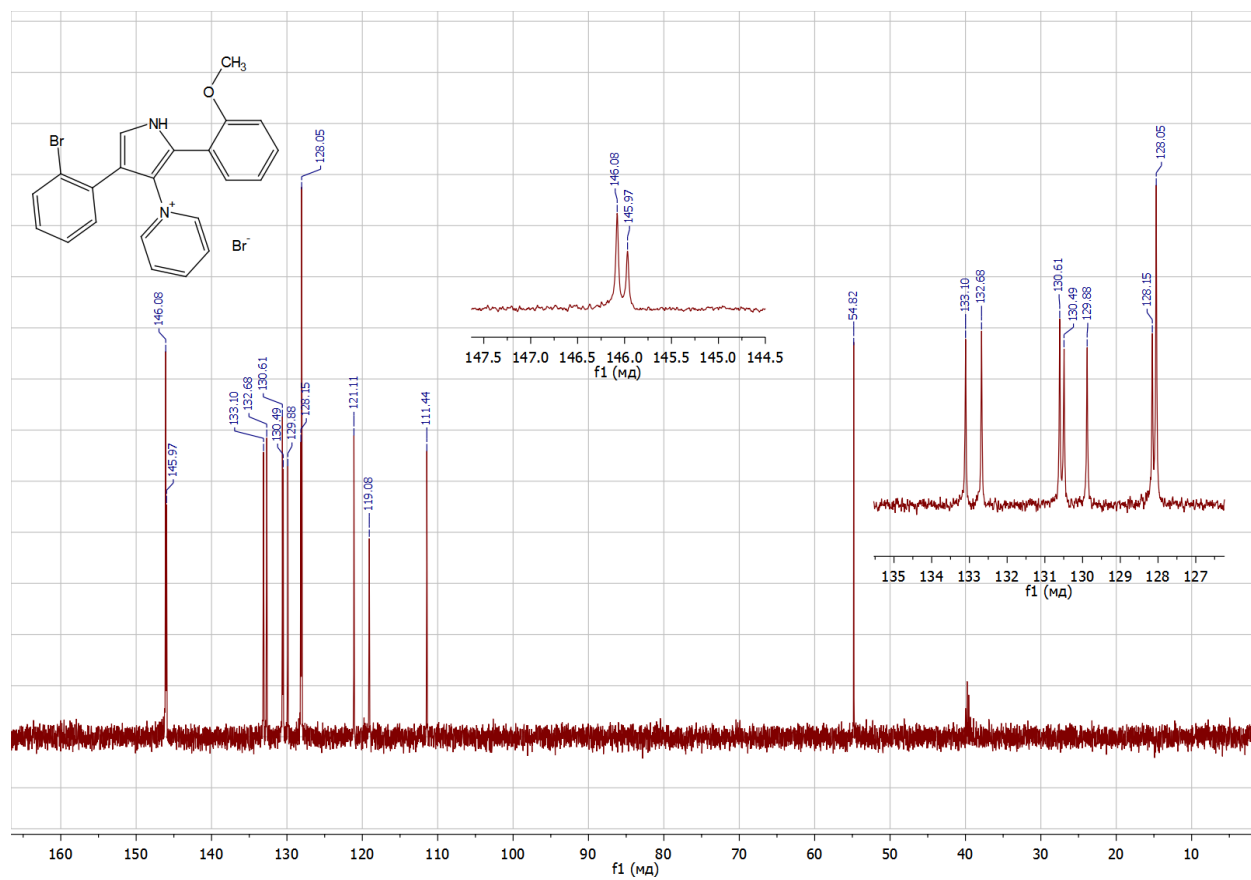

$^1\text{H}$  NMR (400 MHz,  $\text{DMSO-}d_6$ ) of 1-(4-(2-bromophenyl)-2-(3-methoxyphenyl)-1*H*-pyrrol-3-yl)pyridin-1-ium bromide (**1h**)

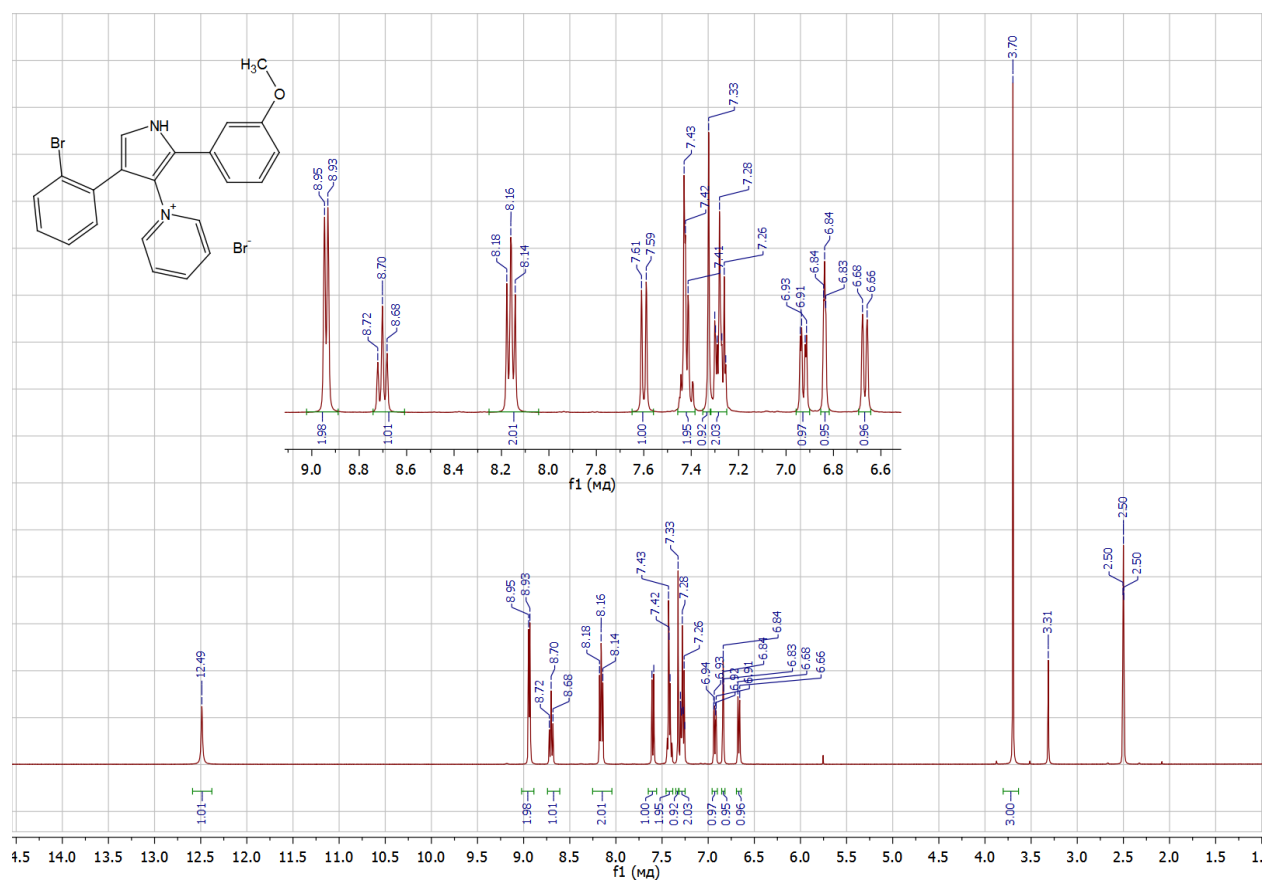

$^{13}\text{C}\{^1\text{H}\}$  NMR (101 MHz,  $\text{DMSO-}d_6$ ) of 1-(4-(2-bromophenyl)-2-(3-methoxyphenyl)-1*H*-pyrrol-3-yl)pyridin-1-ium bromide (**1h**)

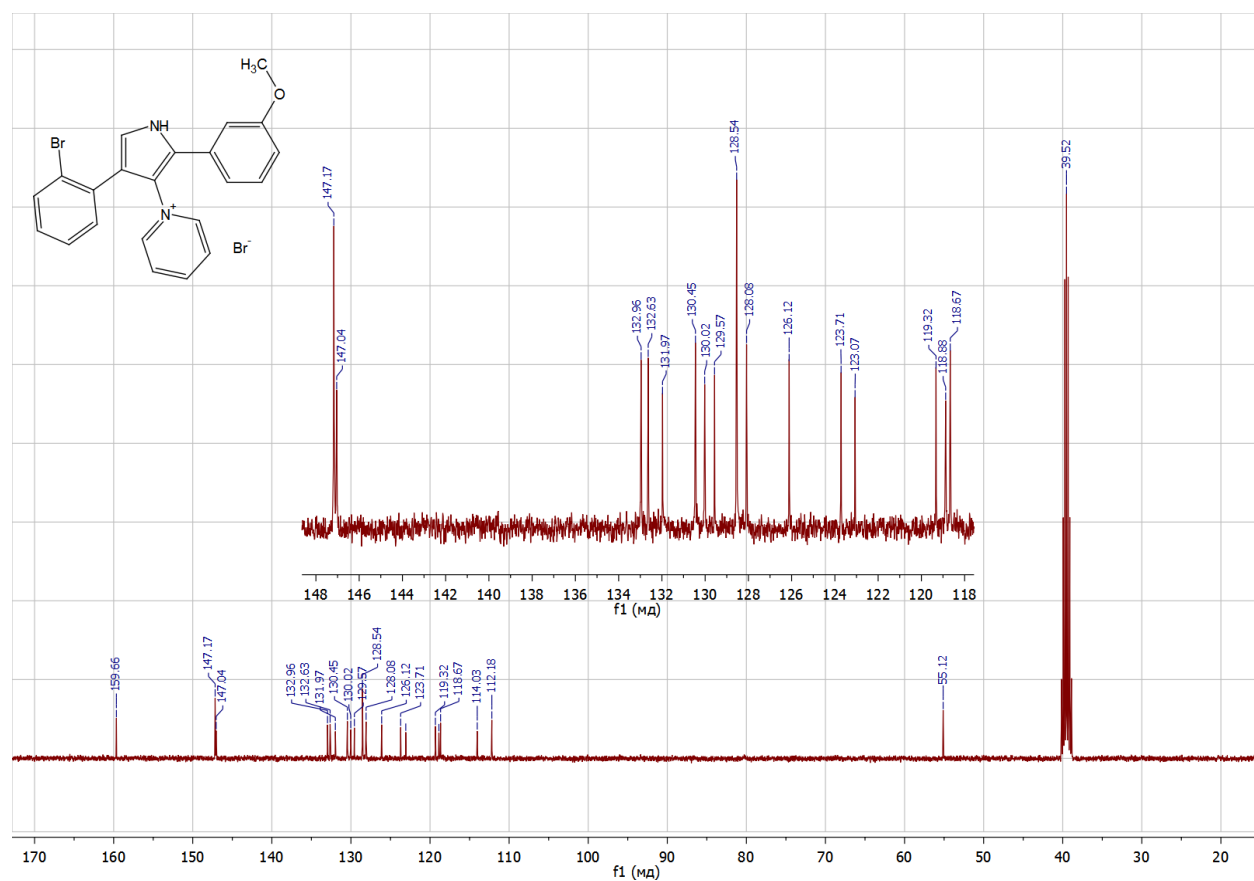

$^{13}\text{C}$  DEPT135 NMR (101 MHz,  $\text{DMSO-}d_6$ ) of 1-(4-(2-bromophenyl)-2-(3-methoxyphenyl)-1*H*-pyrrol-3-yl)pyridin-1-ium bromide (**1h**)

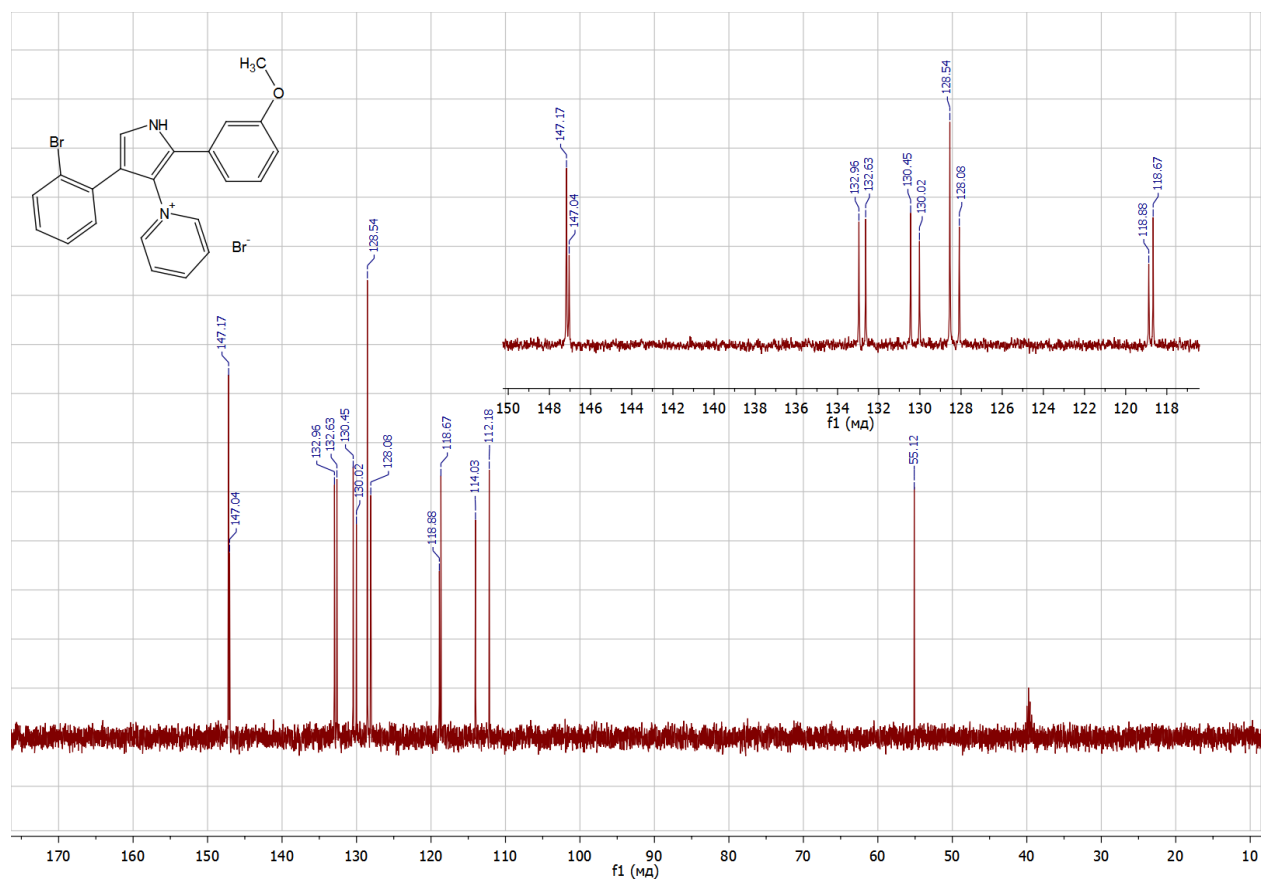



$^1\text{H}$  NMR (400 MHz,  $\text{DMSO}-d_6$ ) of 1-(4-(2-bromophenyl)-2-(2,4-dimethoxyphenyl)-1*H*-pyrrol-3-yl)pyridin-1-ium bromide (**1i**)

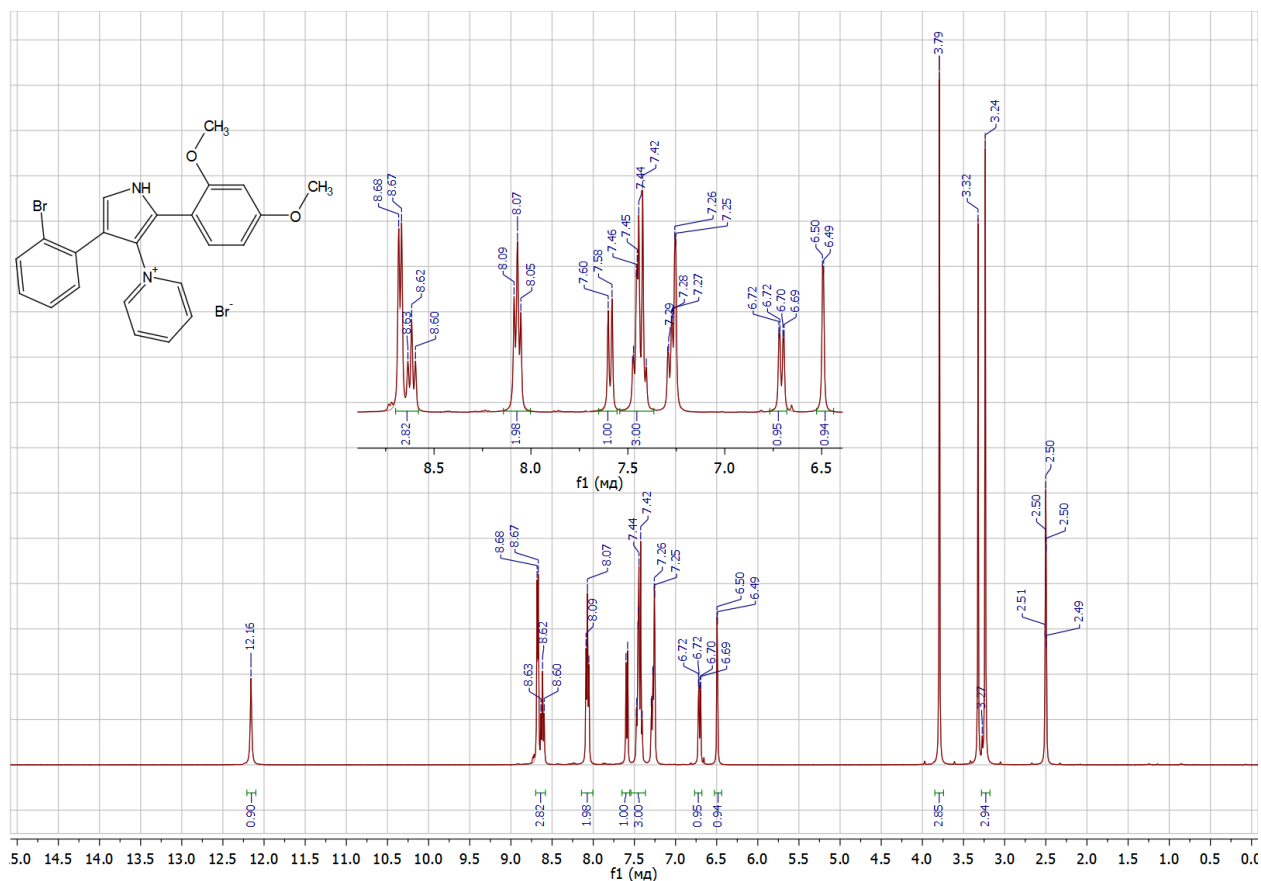

$^{13}\text{C}\{^1\text{H}\}$  NMR (101 MHz,  $\text{DMSO}-d_6$ ) of 1-(4-(2-bromophenyl)-2-(2,4-dimethoxyphenyl)-1*H*-pyrrol-3-yl)pyridin-1-ium bromide (**1i**)

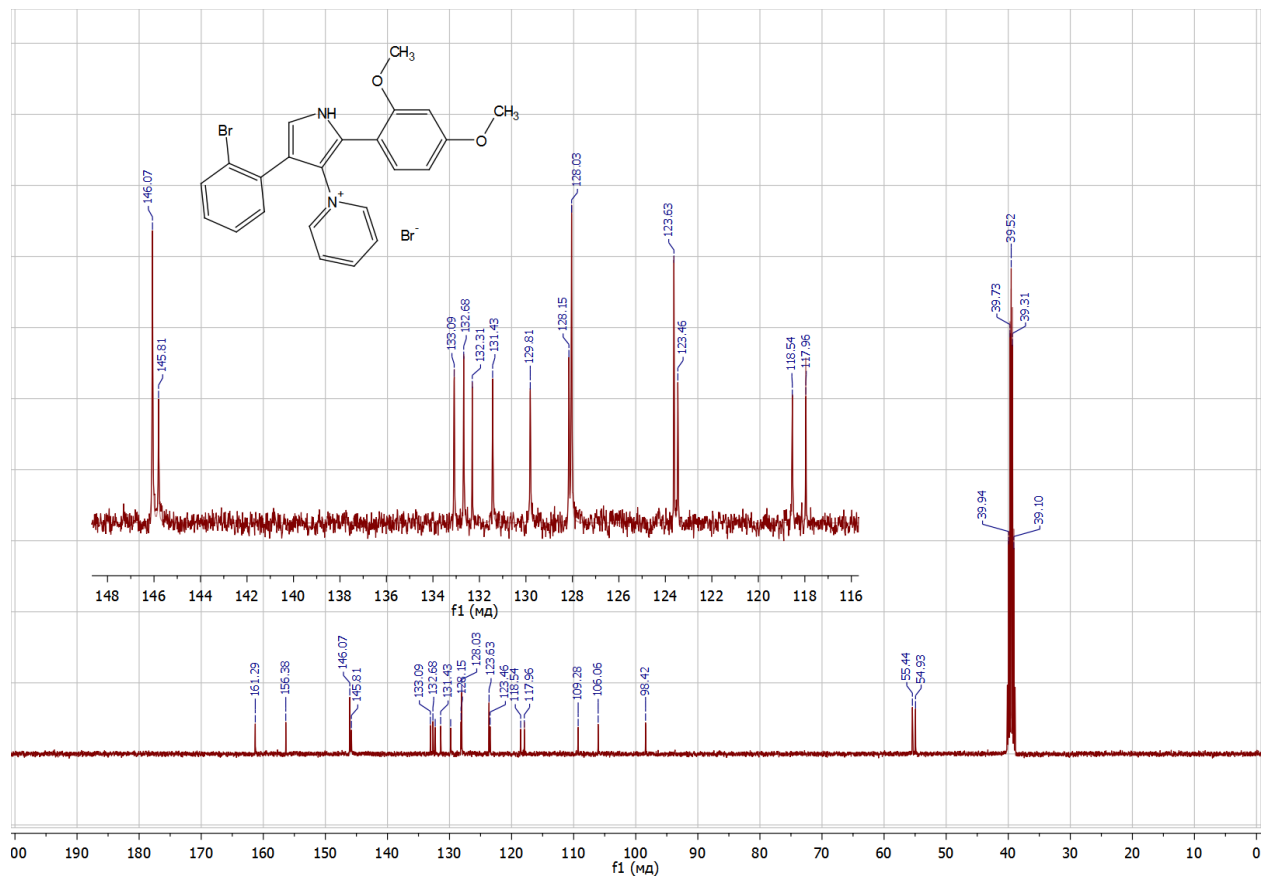

$^{13}\text{C}$  DEPT135 NMR (101 MHz,  $\text{DMSO-}d_6$ ) of 1-(4-(2-bromophenyl)-2-(2,4-dimethoxyphenyl)-1*H*-pyrrol-3-yl)pyridin-1-ium bromide (**1i**)

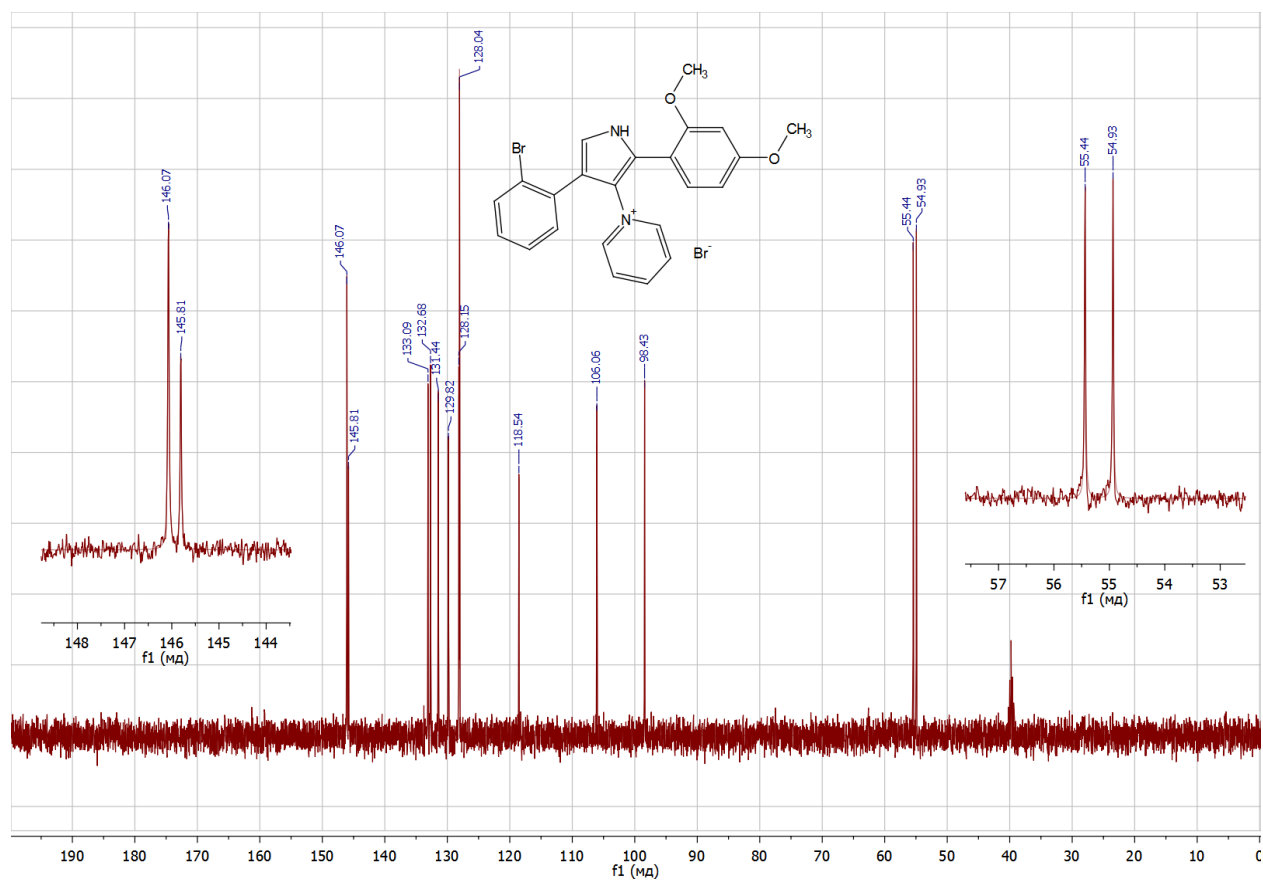

**Chemical Structure of Compound 10:**

[O-][N+](=O)c1ccc(cc1)c2c[nH]c2c3ccccc3[N+]4CCCCC4.[Br-]

**<sup>1</sup>H NMR Spectrum (DMSO-d<sub>6</sub>):**

| Chemical Shift (ppm)               | Integration |
|------------------------------------|-------------|
| 12.86                              | 0.99        |
| 8.25, 8.23, 8.22, 8.21, 8.19, 8.17 | 4.00        |
| 7.62, 7.60                         | 0.99        |
| 7.47, 7.44, 7.43, 7.42, 7.31, 7.29 | 4.99        |
| 8.98                               | 1.98        |
| 8.75, 8.73                         | 1.00        |
| 8.55, 8.23                         | 4.00        |
| 7.62, 7.60, 7.46, 7.42, 7.49       | 0.99        |
| 7.31, 7.29                         | 4.99        |
| 3.32                               | 1.04        |
| 2.50, 2.49                         | 2.51        |

Chemical structure: Brc1ccc(cc1)-c2c[nH]c(c2)[n+]3ccccc3.[Br-]

<sup>13</sup>C NMR spectrum (CDCl<sub>3</sub>) showing chemical shifts (ppm) for the compound.

Chemical shifts (ppm) labeled in the spectrum:

- 147.44, 147.00, 146.41, 134.76, 132.98, 132.66, 131.54, 130.23, 128.85, 128.12, 127.46, 124.47, 124.02, 123.70, 120.83, 120.28, 39.52

$^{13}\text{C}$  DEPT135 NMR (101 MHz,  $\text{DMSO}-d_6$ ) of 1-(4-(2-bromophenyl)-2-(4-nitrophenyl)-1*H*-pyrrol-3-yl)pyridin-1-ium bromide (**1j**)

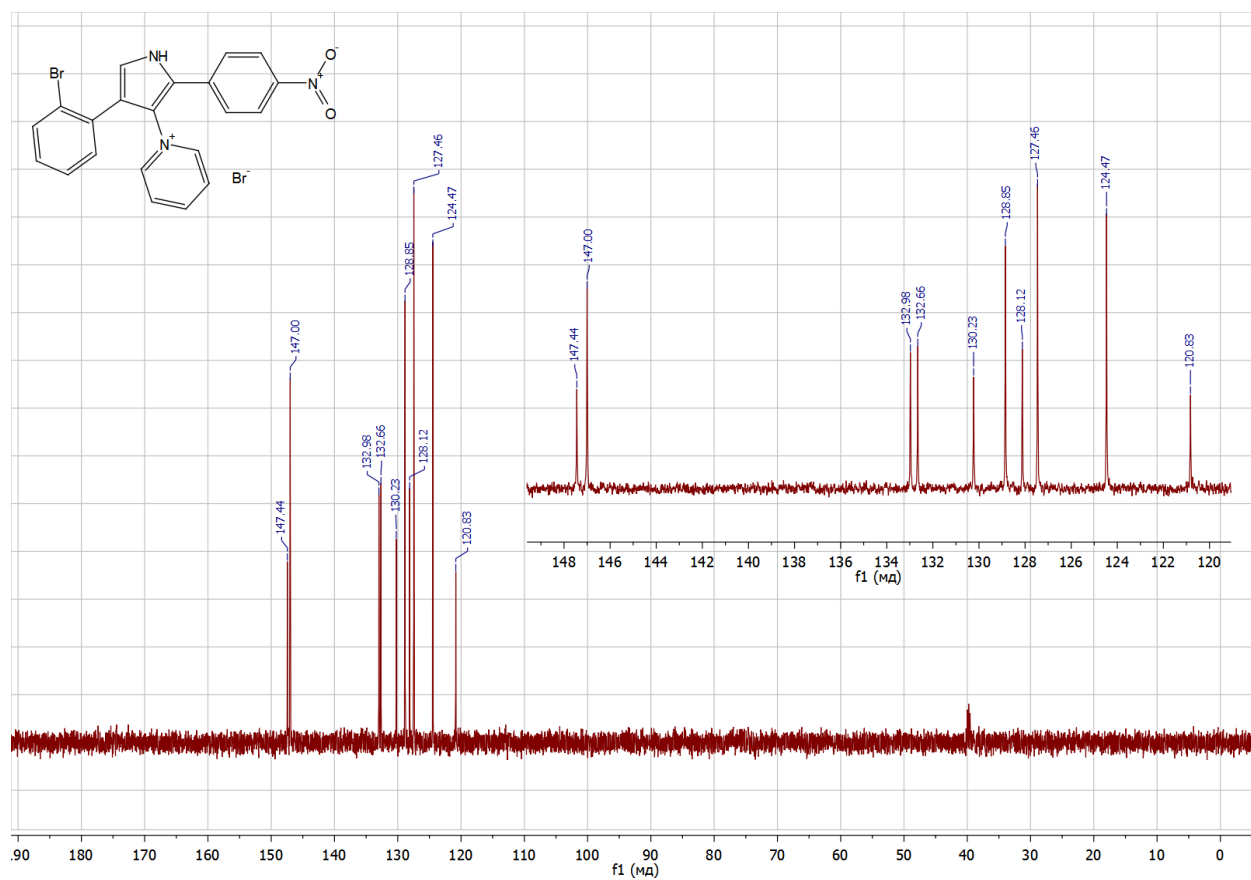

$^1\text{H}$  NMR (400 MHz,  $\text{DMSO-}d_6$ ) of 1-(4-(2-bromophenyl)-2-(3-nitrophenyl)-1*H*-pyrrol-3-yl)pyridin-1-ium bromide (**1k**)

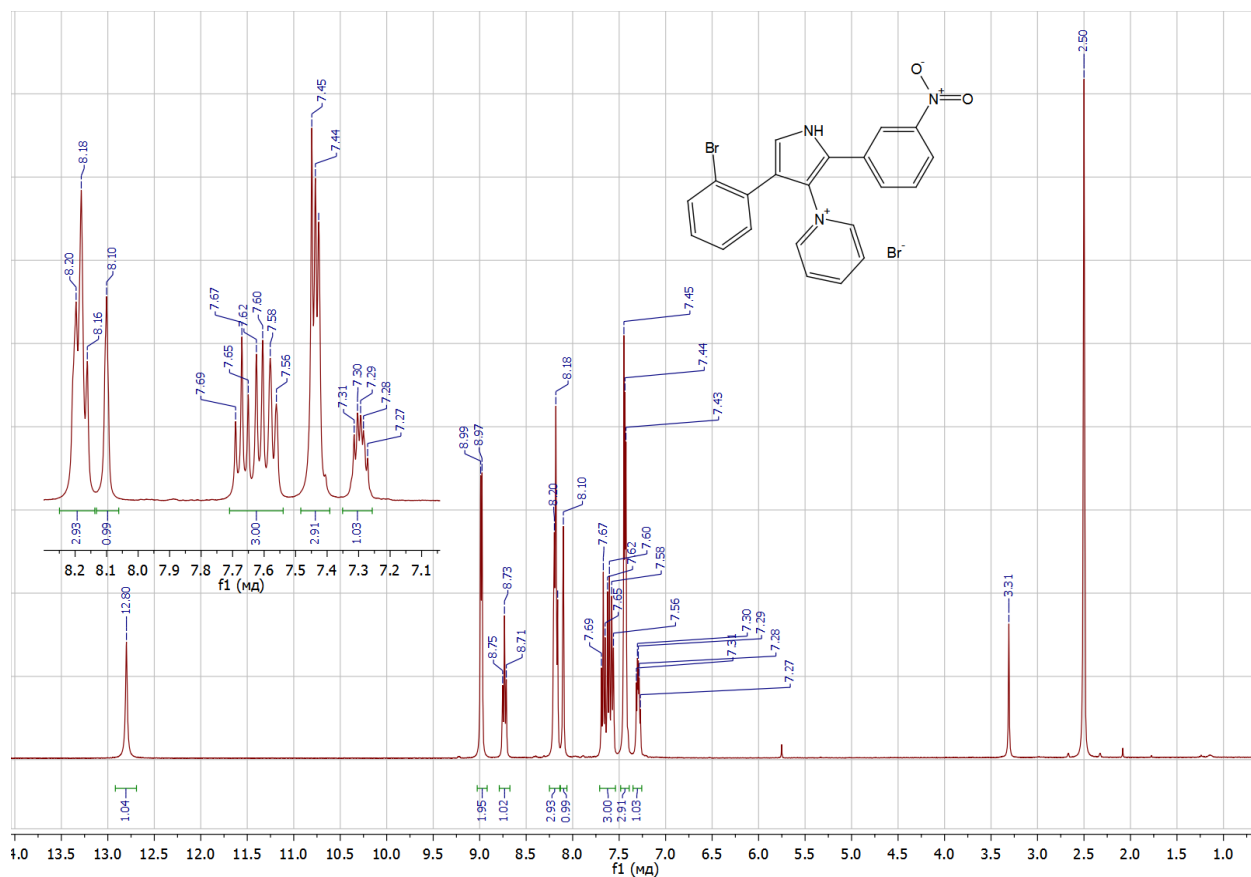

$^{13}\text{C}\{^1\text{H}\}$  NMR (101 MHz,  $\text{DMSO-}d_6$ ) of 1-(4-(2-bromophenyl)-2-(3-nitrophenyl)-1*H*-pyrrol-3-yl)pyridin-1-ium bromide (**1k**)

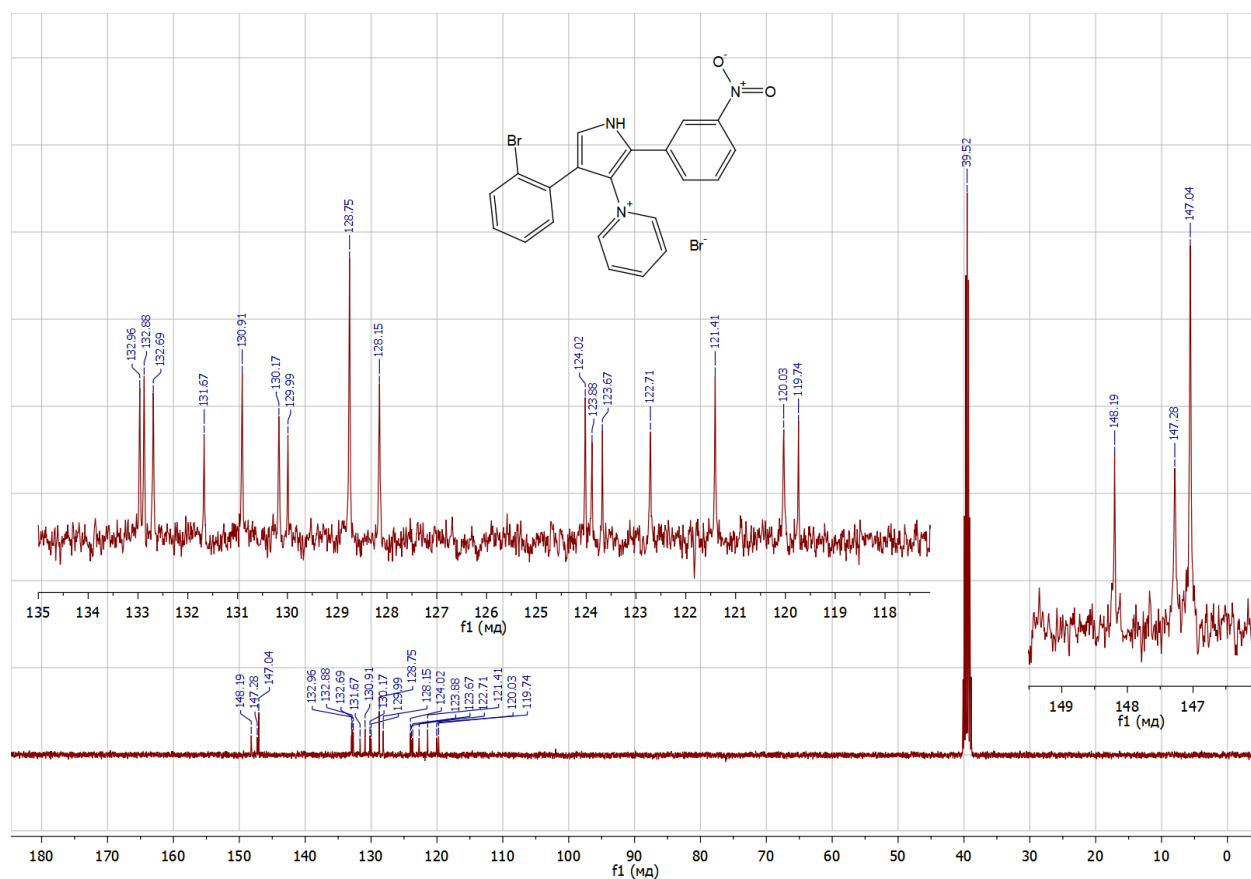

$^{13}\text{C}$  DEPT135 NMR (101 MHz,  $\text{DMSO-}d_6$ ) of 1-(4-(2-bromophenyl)-2-(3-nitrophenyl)-1*H*-pyrrol-3-yl)pyridin-1-ium bromide (**1k**)

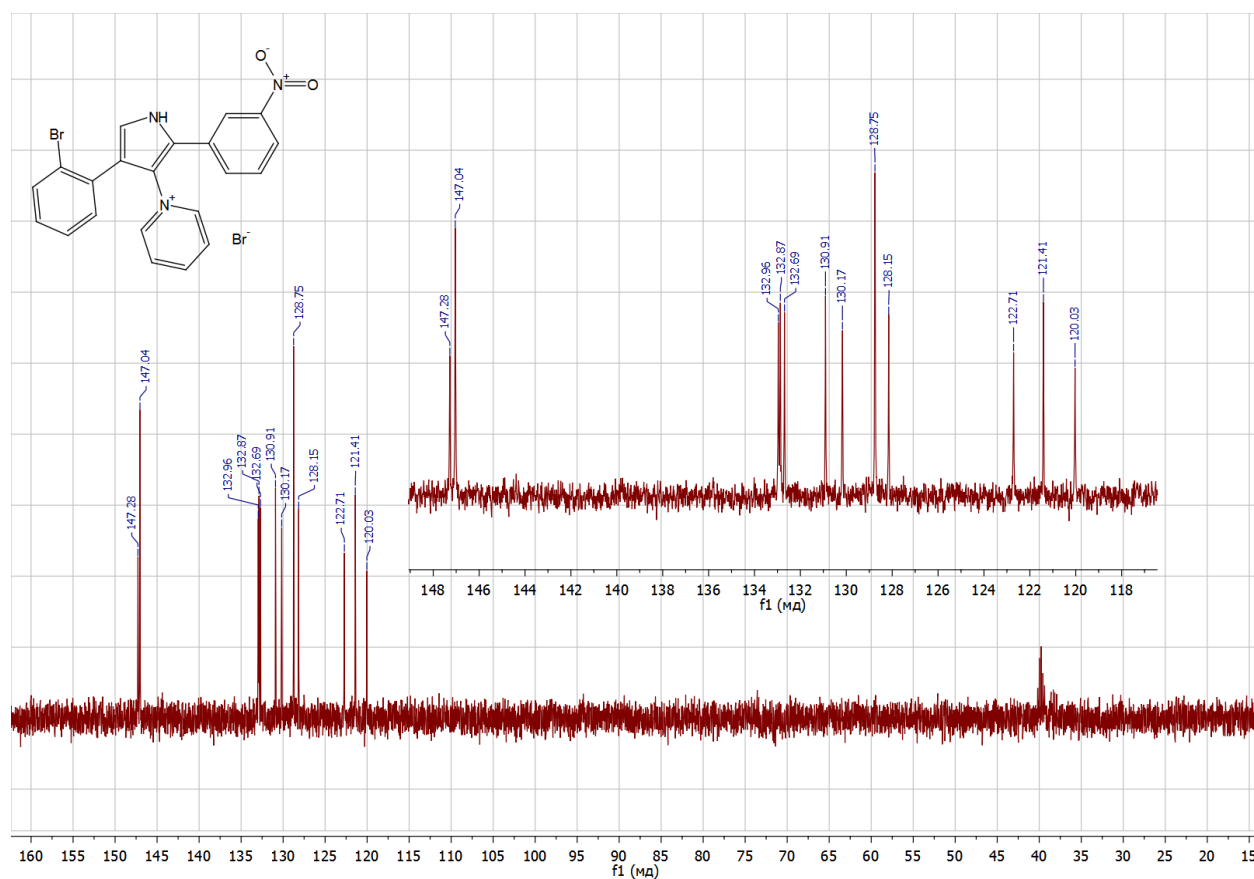

$^1\text{H}$  NMR (400 MHz,  $\text{DMSO}-d_6$ ) of 1-(4-(2-bromophenyl)-2-(4-cyanophenyl)-1*H*-pyrrol-3-yl)pyridin-1-ium bromide (**11**)

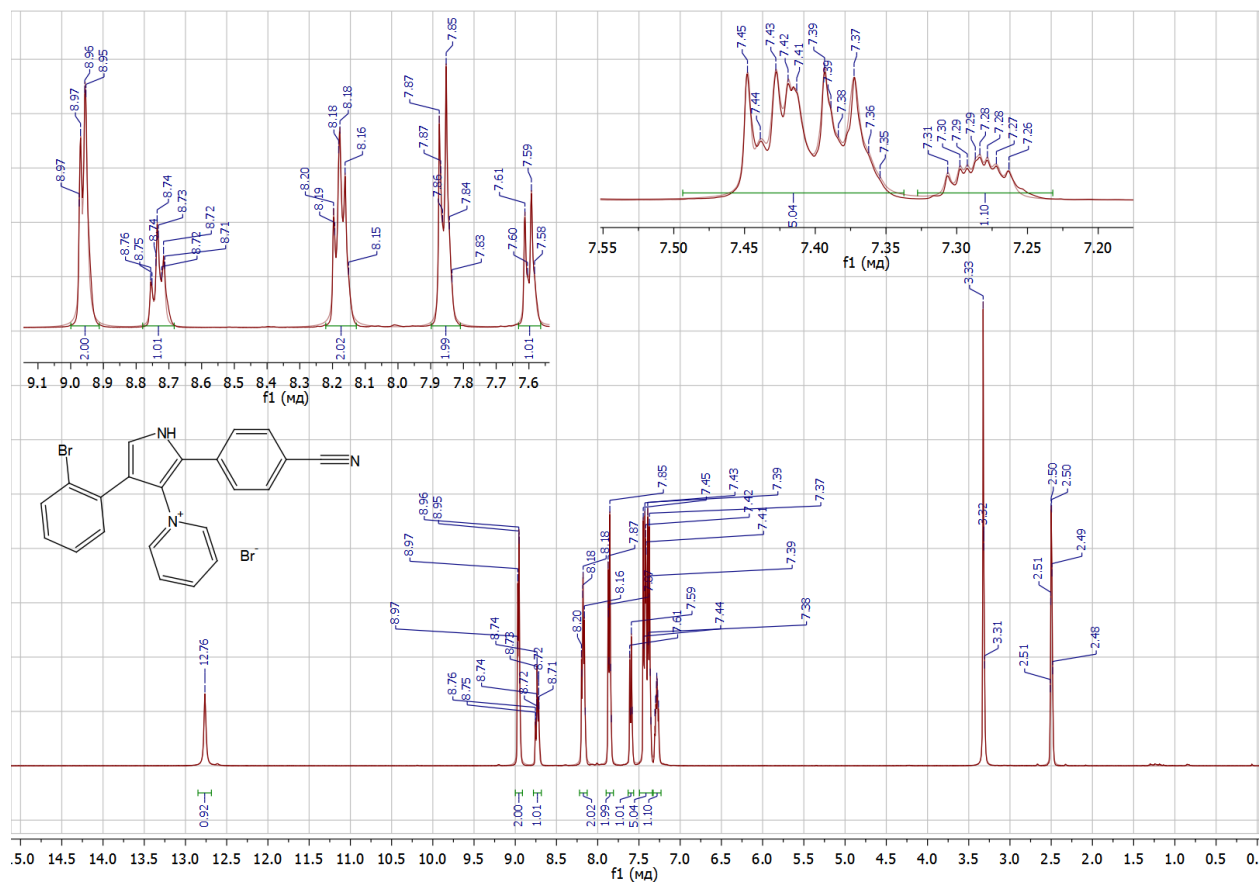

$^{13}\text{C}\{^1\text{H}\}$  NMR (101 MHz,  $\text{DMSO}-d_6$ ) of 1-(4-(2-bromophenyl)-2-(4-cyanophenyl)-1*H*-pyrrol-3-yl)pyridin-1-ium bromide (**11**)

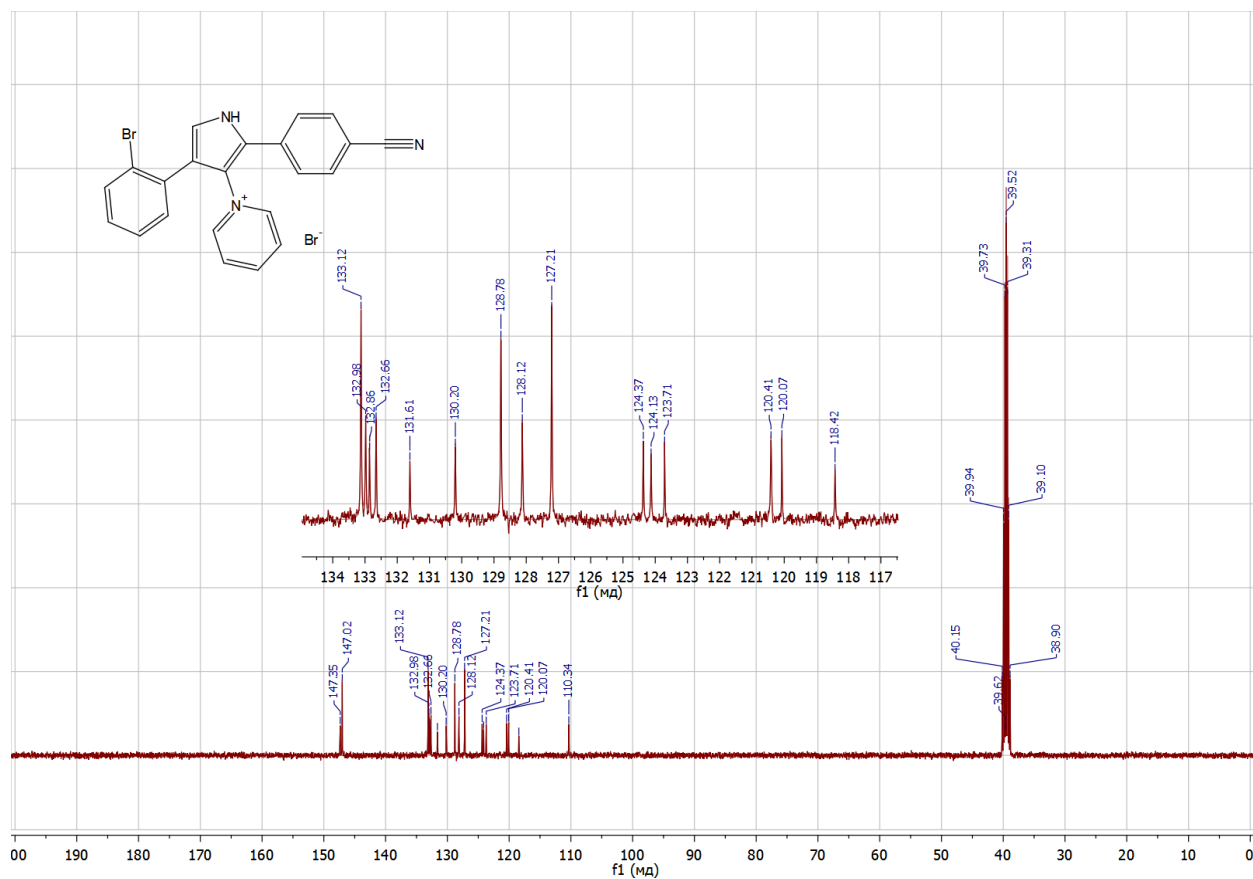

$^{13}\text{C}$  DEPT135 NMR (101 MHz,  $\text{DMSO-}d_6$ ) of 1-(4-(2-bromophenyl)-2-(4-cyanophenyl)-1*H*-pyrrol-3-yl)pyridin-1-ium bromide (**11**)

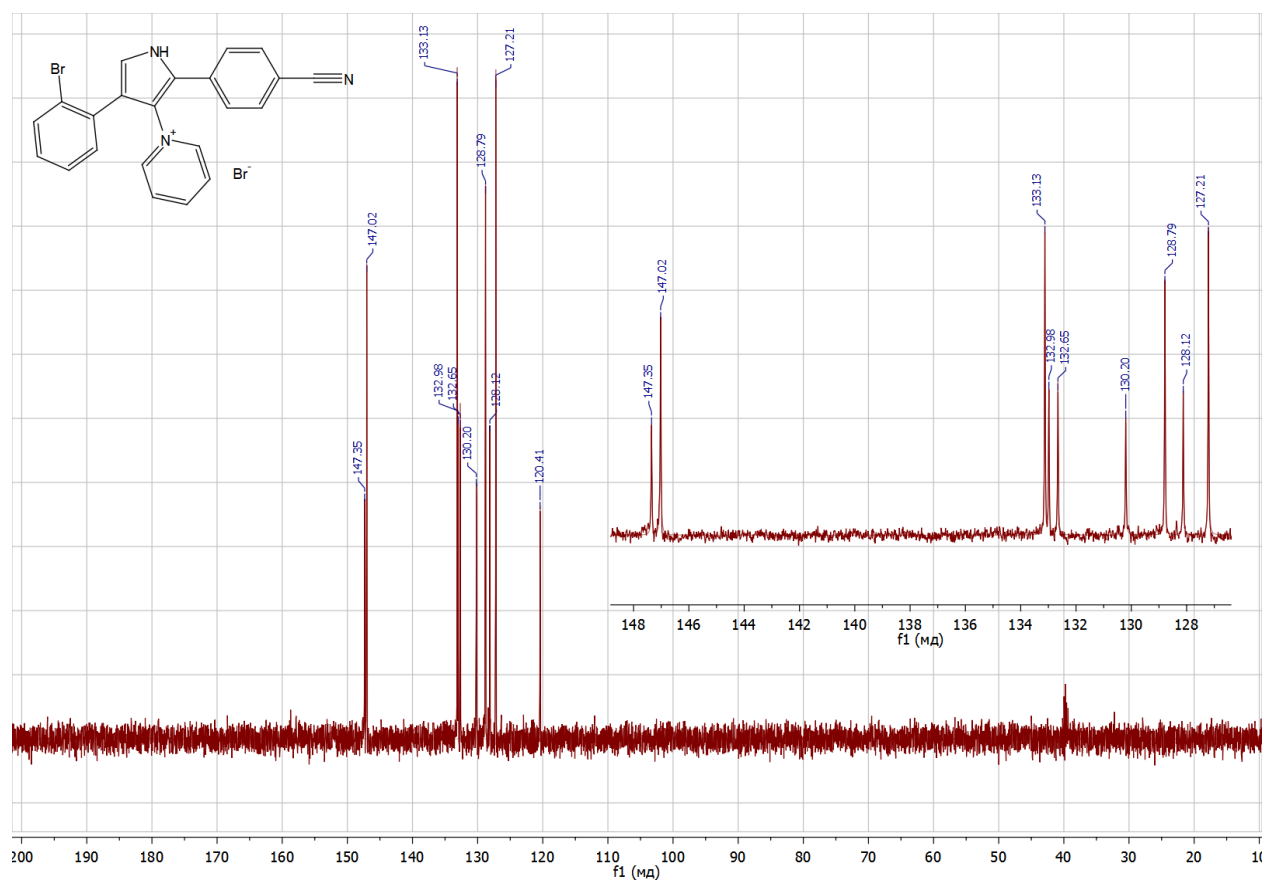



$^1\text{H}$  NMR (400 MHz,  $\text{DMSO-}d_6$ ) of 1-(4-(2-bromophenyl)-2-(pyridin-2-yl)-1*H*-pyrrol-3-yl)pyridin-1-ium iodide (**1m**)

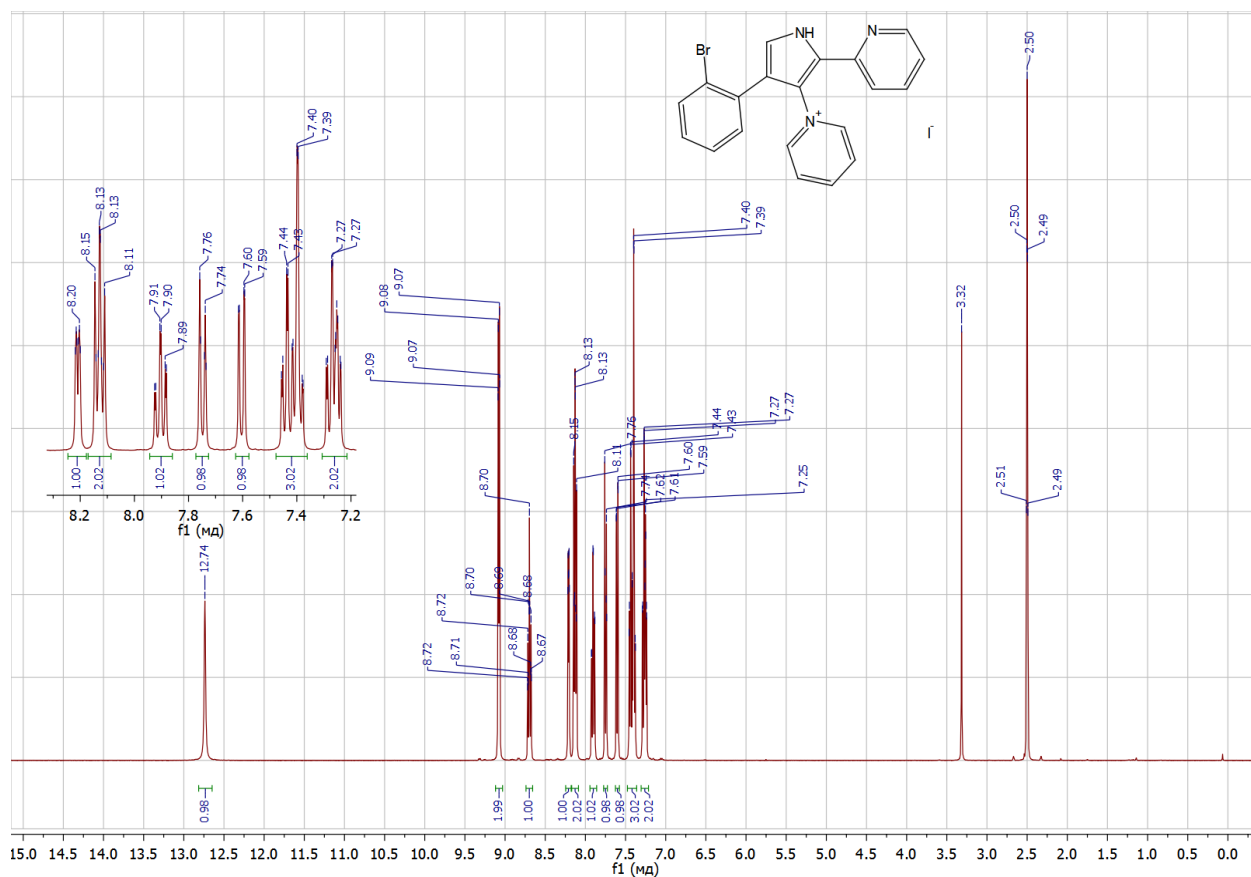

$^{13}\text{C}\{^1\text{H}\}$  NMR (101 MHz,  $\text{DMSO-}d_6$ ) of 1-(4-(2-bromophenyl)-2-(pyridin-2-yl)-1*H*-pyrrol-3-yl)pyridin-1-ium iodide (**1m**)

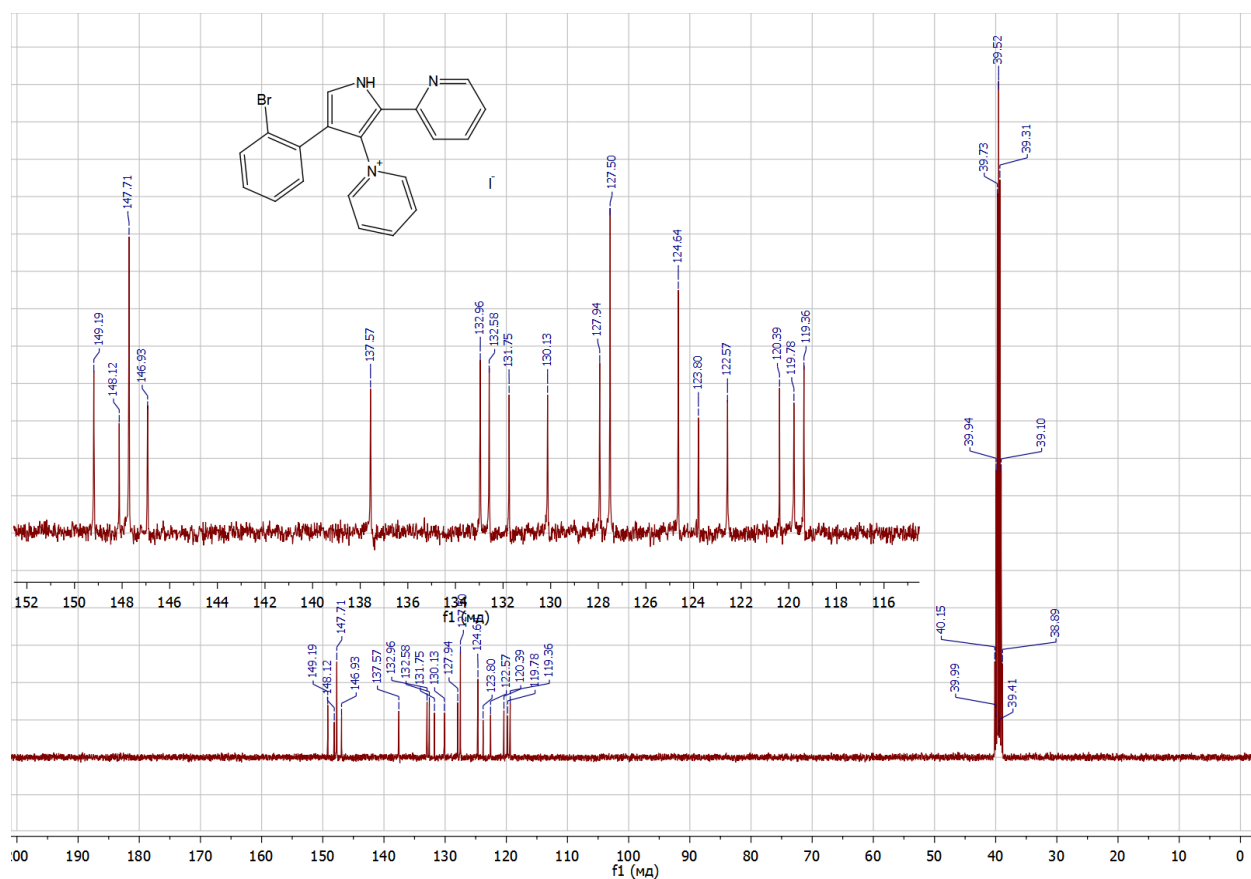

$^{13}\text{C}$  DEPT135 NMR (101 MHz,  $\text{DMSO-}d_6$ ) of 1-(4-(2-bromophenyl)-2-(pyridin-2-yl)-1H-pyrrol-3-yl)pyridin-1-ium iodide (**1m**)

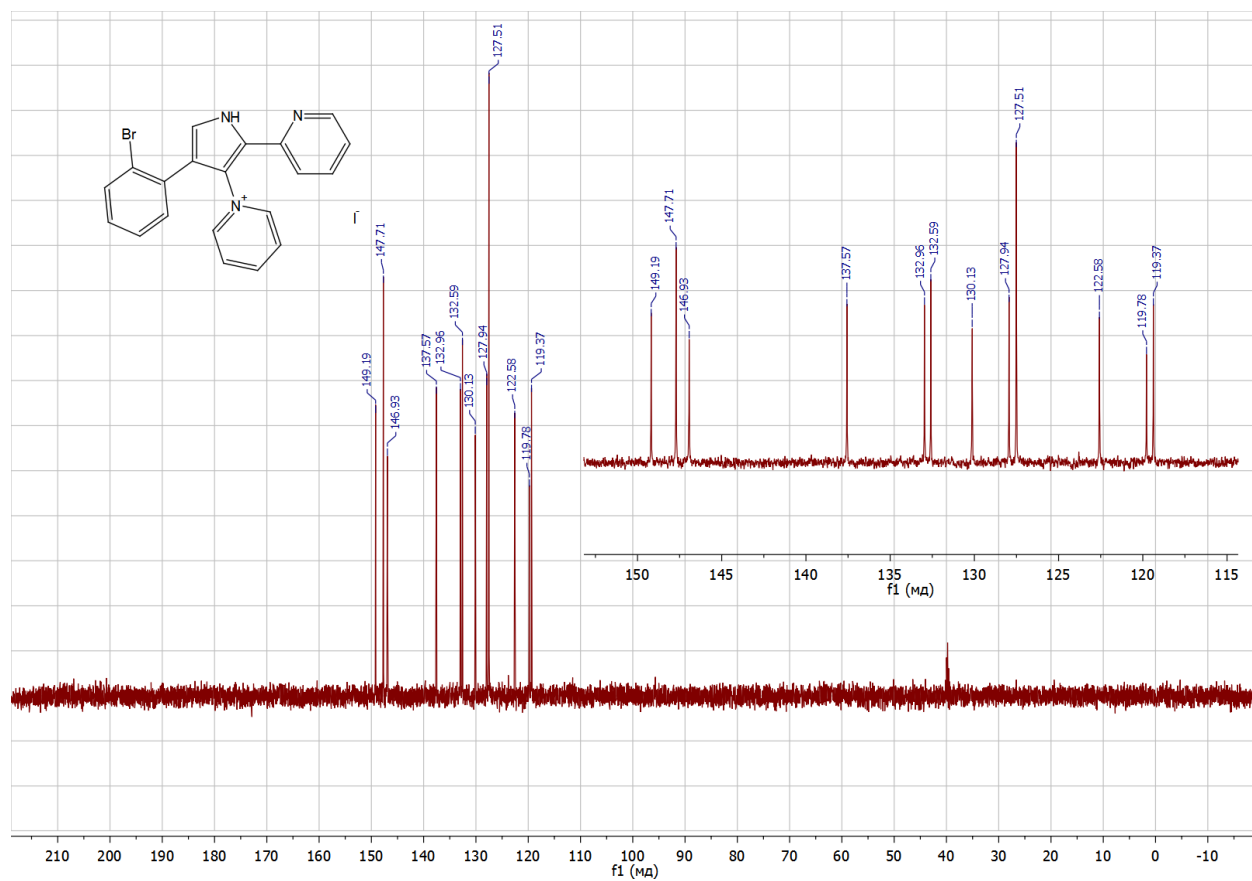

$^1\text{H}$  NMR (400 MHz,  $\text{DMSO}-d_6$ ) of 1-(4-(2-bromophenyl)-2-phenyl-1*H*-pyrrol-3-yl)-4-methylpyridin-1-ium bromide (**1n**)

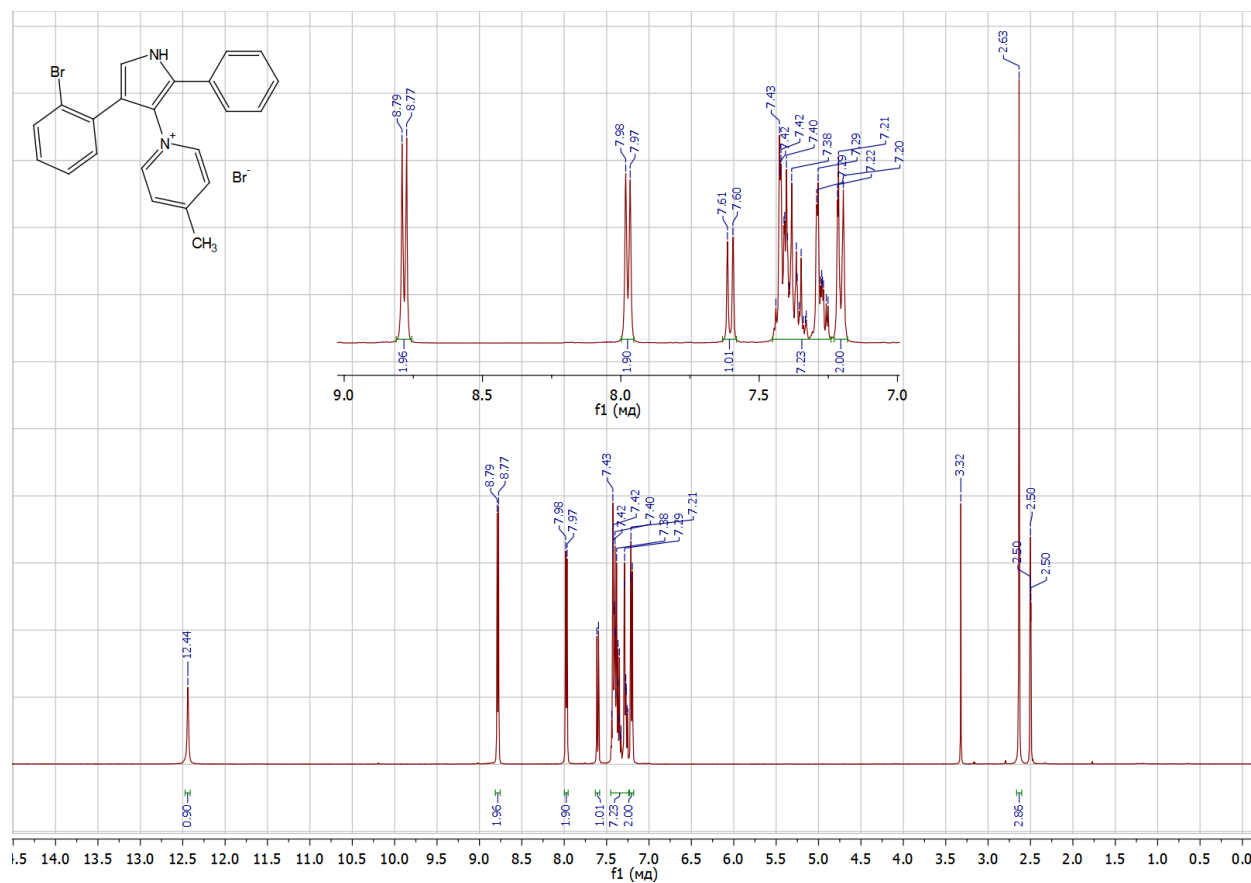

$^{13}\text{C}\{^1\text{H}\}$  NMR (101 MHz,  $\text{DMSO}-d_6$ ) of 1-(4-(2-bromophenyl)-2-phenyl-1*H*-pyrrol-3-yl)-4-methylpyridin-1-ium bromide (**1n**)

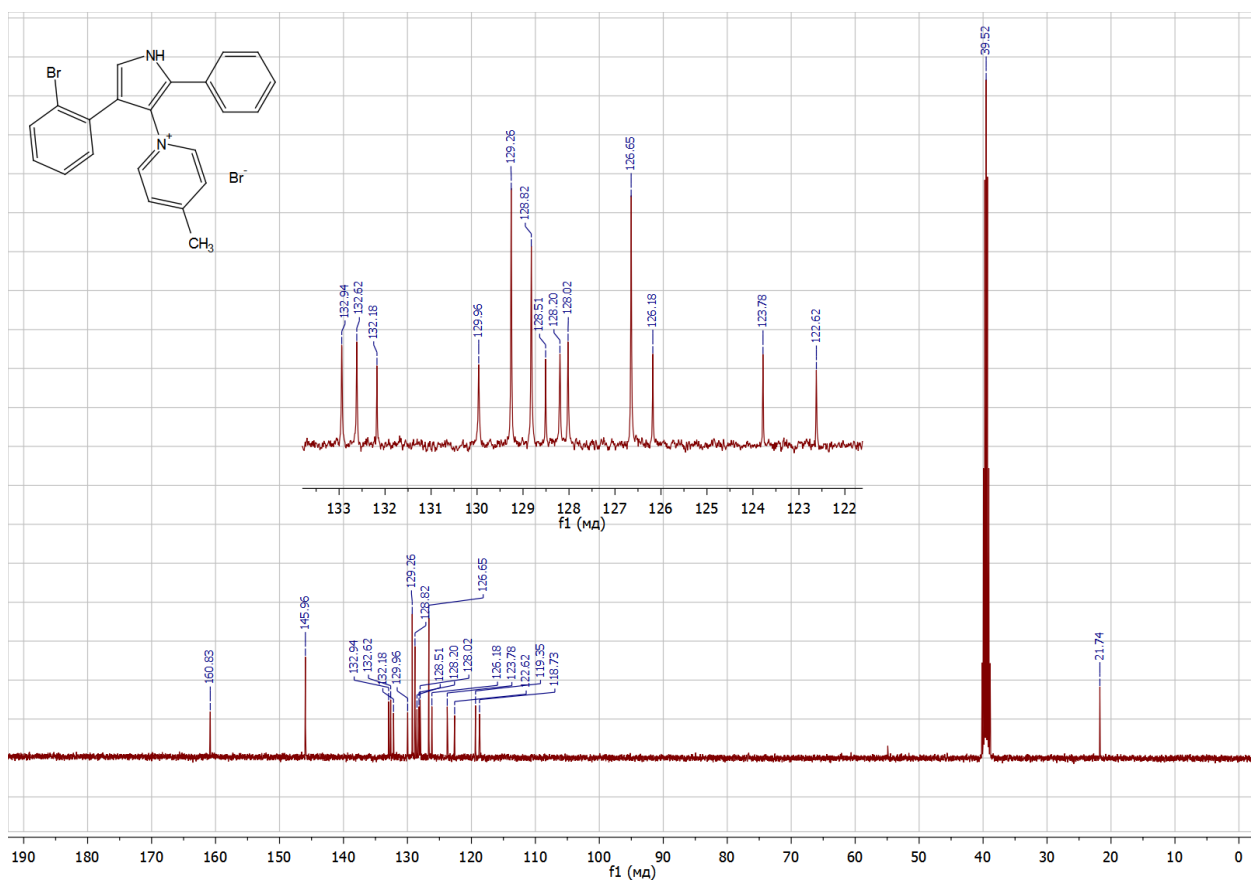

$^{13}\text{C}$  DEPT135 NMR (101 MHz,  $\text{DMSO}-d_6$ ) of 1-(4-(2-bromophenyl)-2-phenyl-1*H*-pyrrol-3-yl)-4-methylpyridin-1-ium bromide (**1n**)

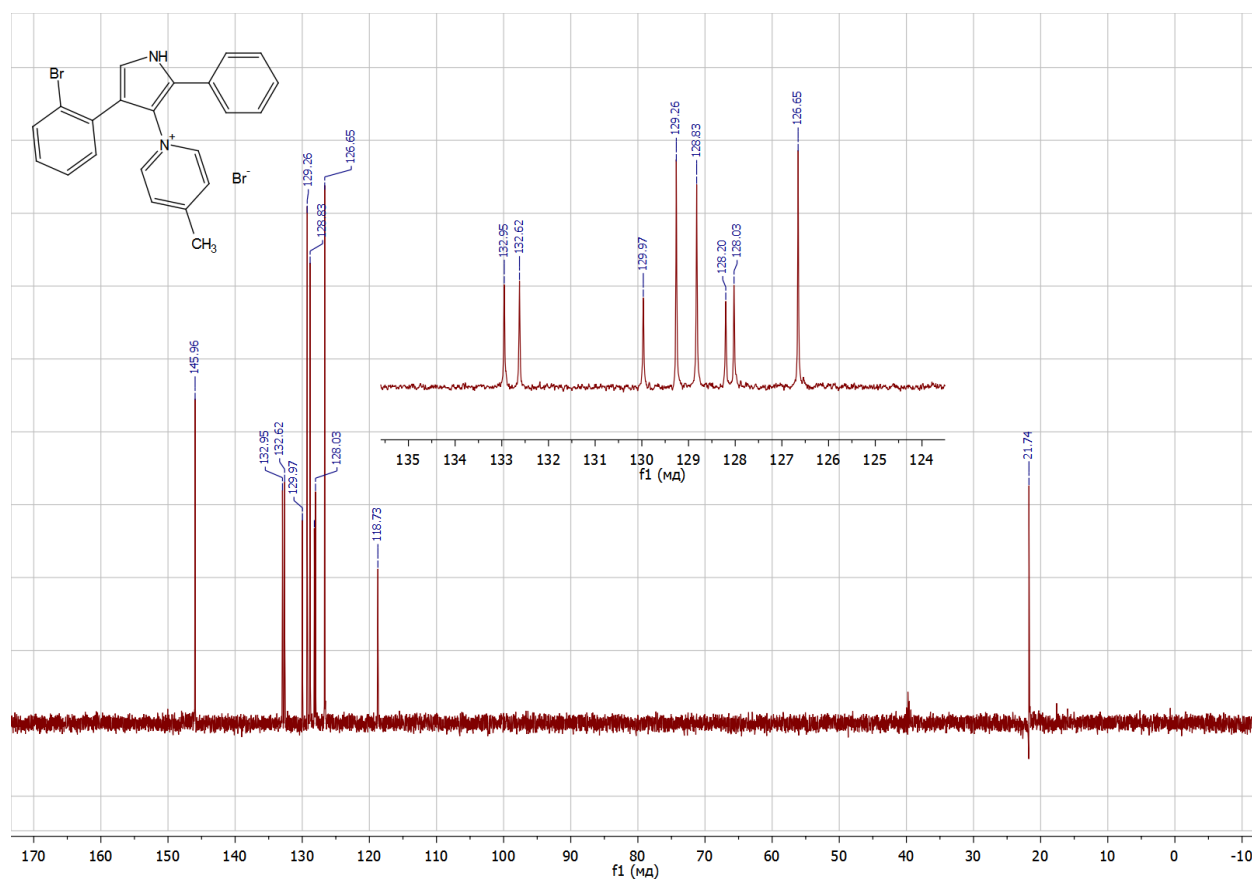

$^1\text{H}$  NMR (400 MHz,  $\text{DMSO-}d_6$ ) of 1-(4-(2-bromophenyl)-2-phenyl-1*H*-pyrrol-3-yl)-4-methoxypyridin-1-ium bromide (**1o**)

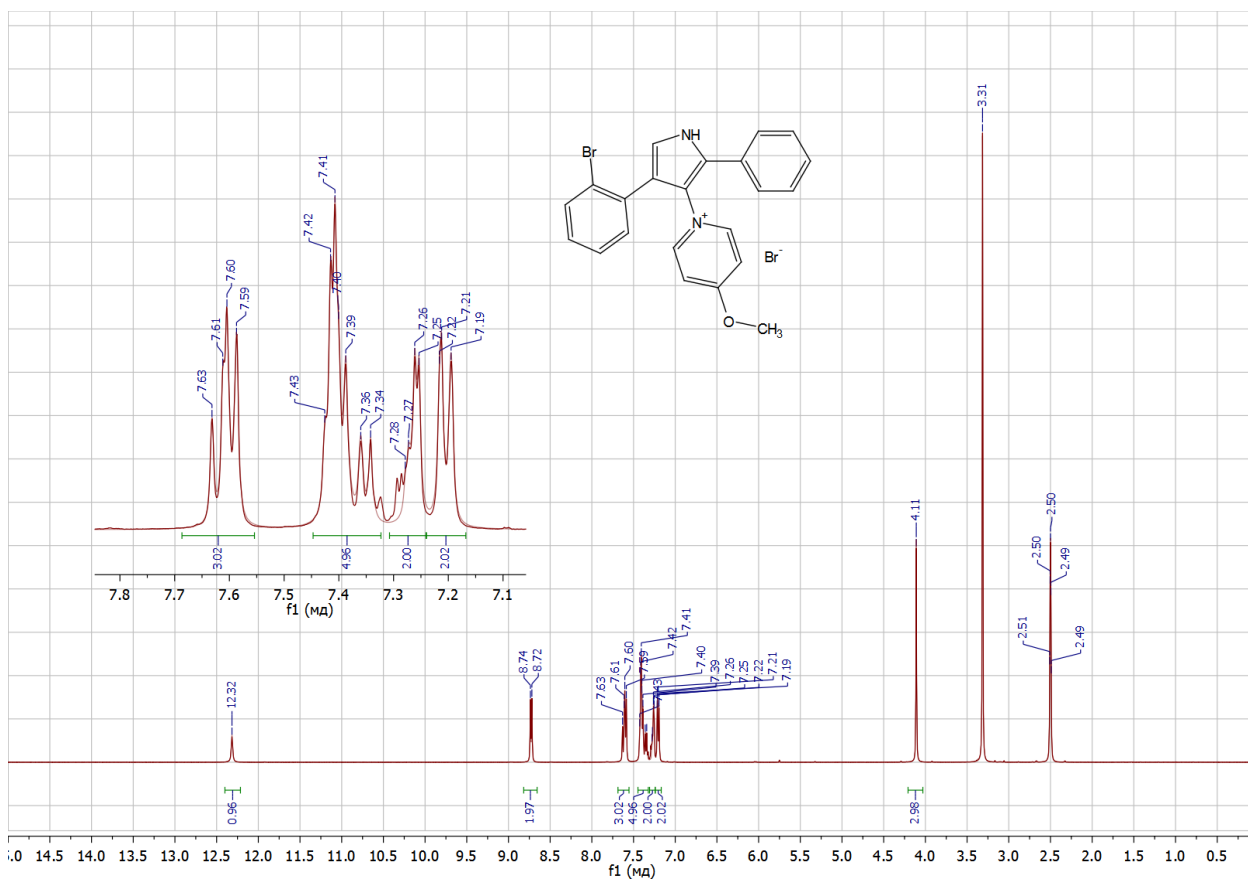

$^{13}\text{C}\{^1\text{H}\}$  NMR (101 MHz,  $\text{DMSO-}d_6$ ) of 1-(4-(2-bromophenyl)-2-phenyl-1*H*-pyrrol-3-yl)-4-methoxypyridin-1-ium bromide (**1o**)

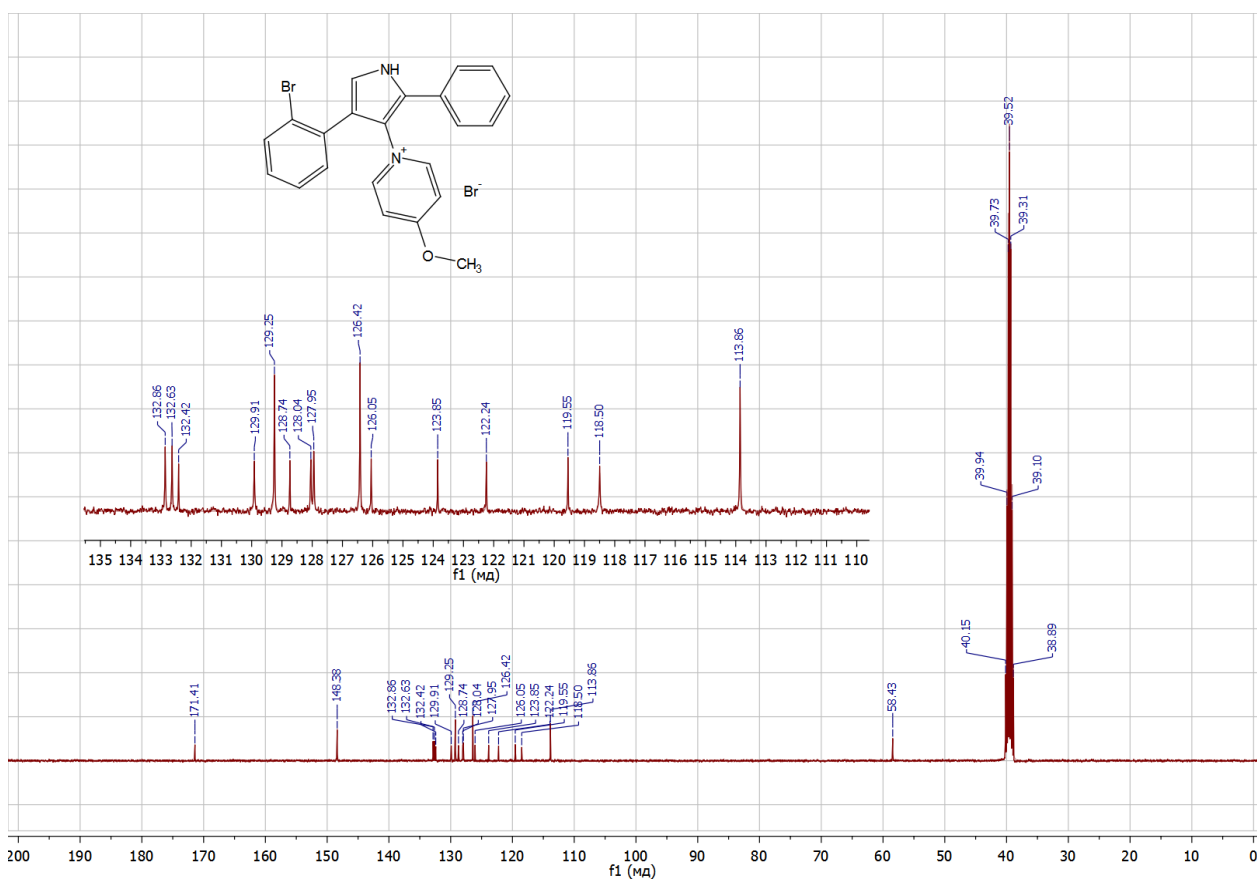

$^{13}\text{C}$  DEPT135 NMR (101 MHz,  $\text{DMSO}-d_6$ ) of 1-(4-(2-bromophenyl)-2-phenyl-1*H*-pyrrol-3-yl)-4-methoxypyridin-1-ium bromide (**1o**)

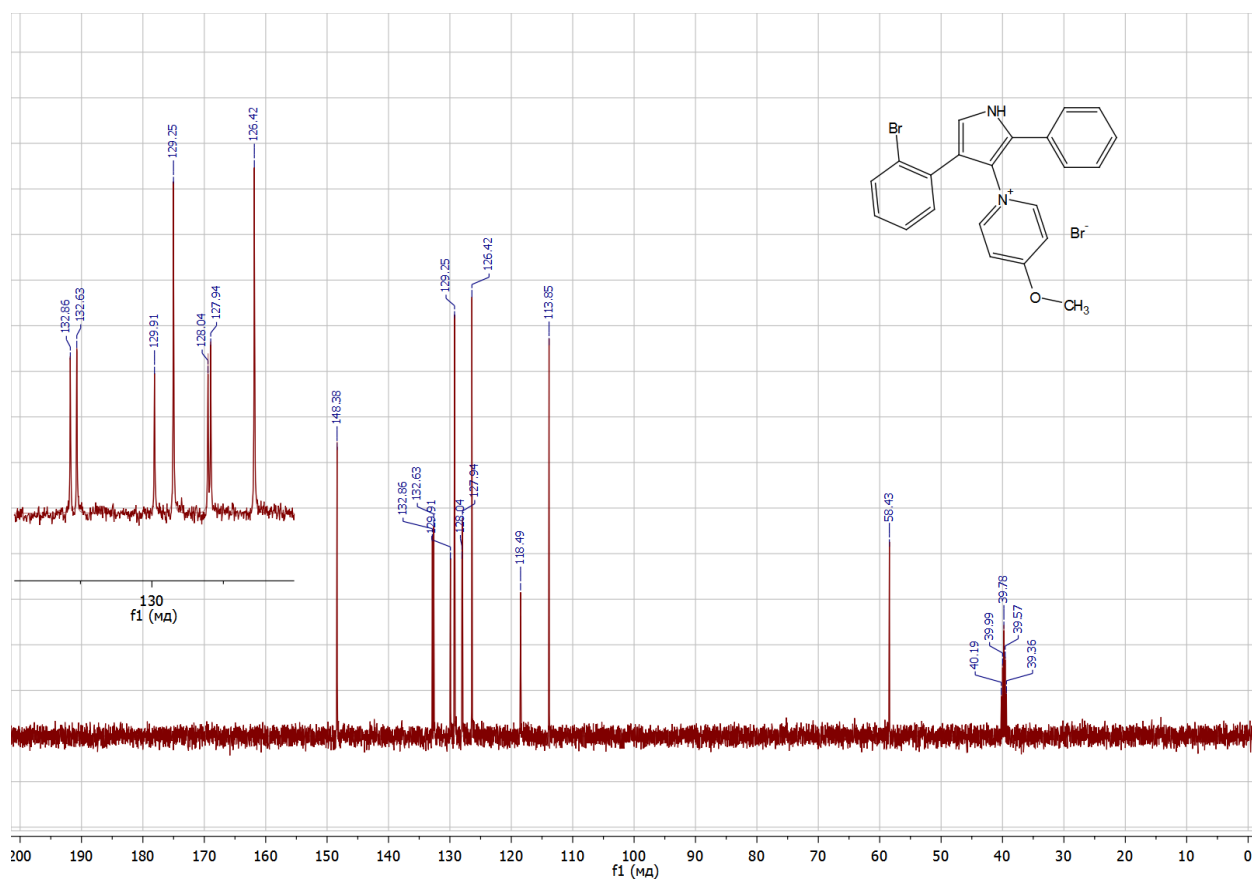

$^1\text{H}$  NMR (400 MHz,  $\text{DMSO}-d_6$ ) of 1-(4-(2-bromophenyl)-2-phenyl-1*H*-pyrrol-3-yl)-4-(dimethylamino)pyridin-1-ium bromide (**1p**)

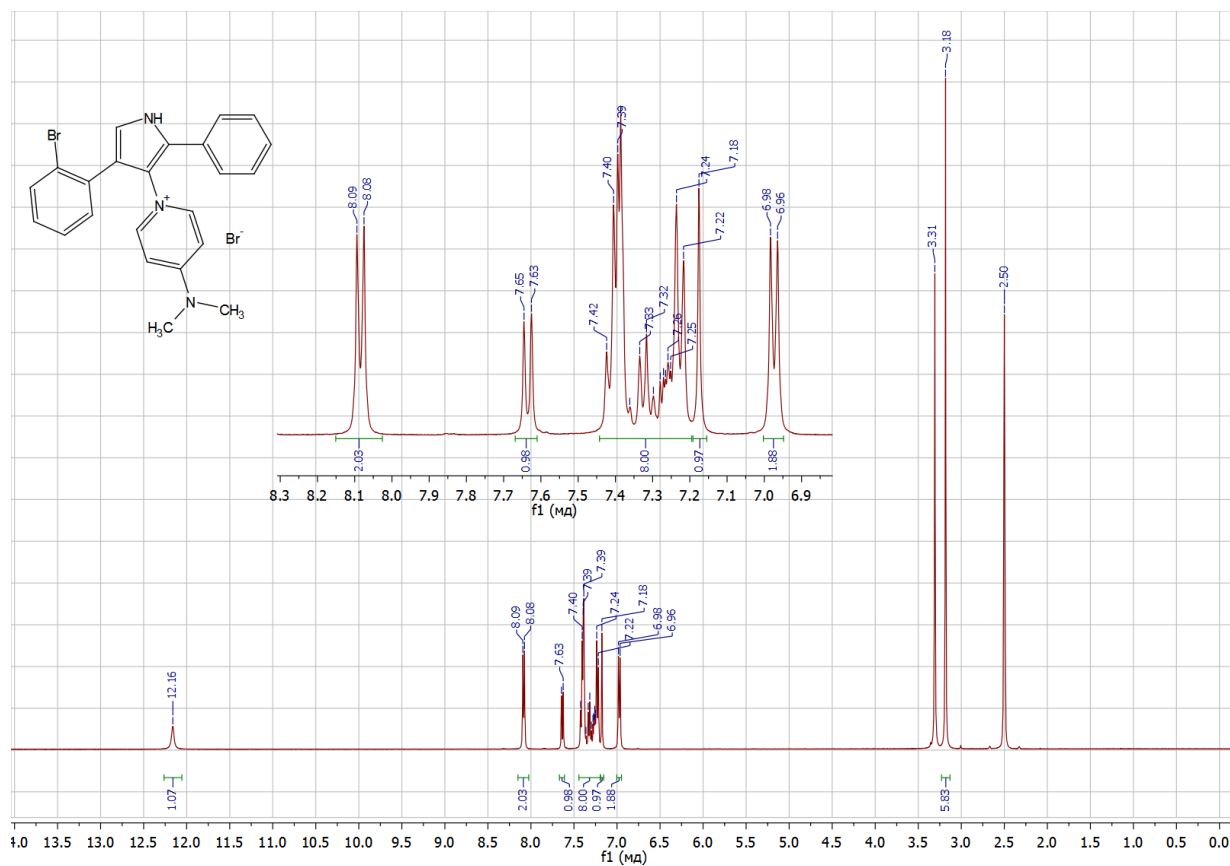

$^{13}\text{C}\{^1\text{H}\}$  NMR (101 MHz,  $\text{DMSO}-d_6$ ) of 1-(4-(2-bromophenyl)-2-phenyl-1*H*-pyrrol-3-yl)-4-(dimethylamino)pyridin-1-ium bromide (**1p**)

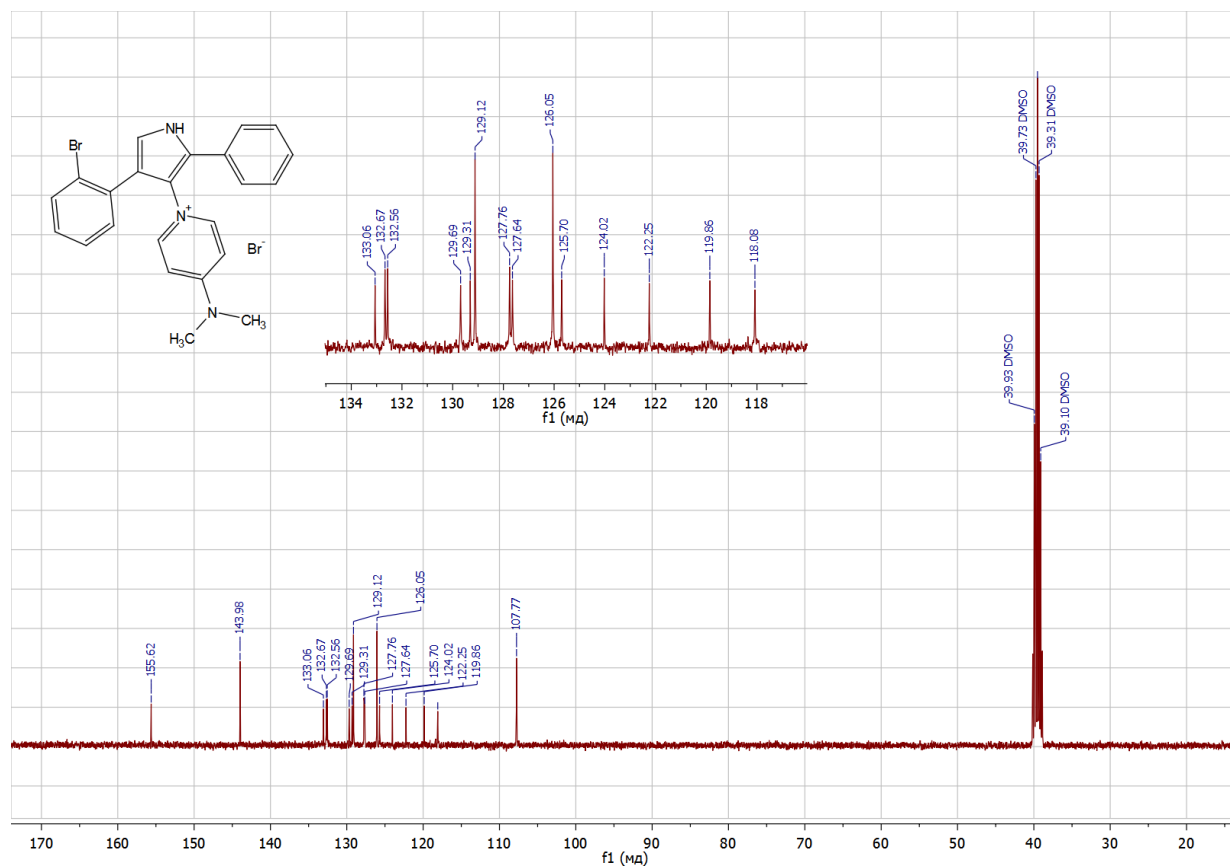

$^{13}\text{C}$  DEPT135 NMR (101 MHz,  $\text{DMSO-}d_6$ ) of 1-(4-(2-bromophenyl)-2-phenyl-1*H*-pyrrol-3-yl)-4-(dimethylamino)pyridin-1-ium bromide (**1p**)

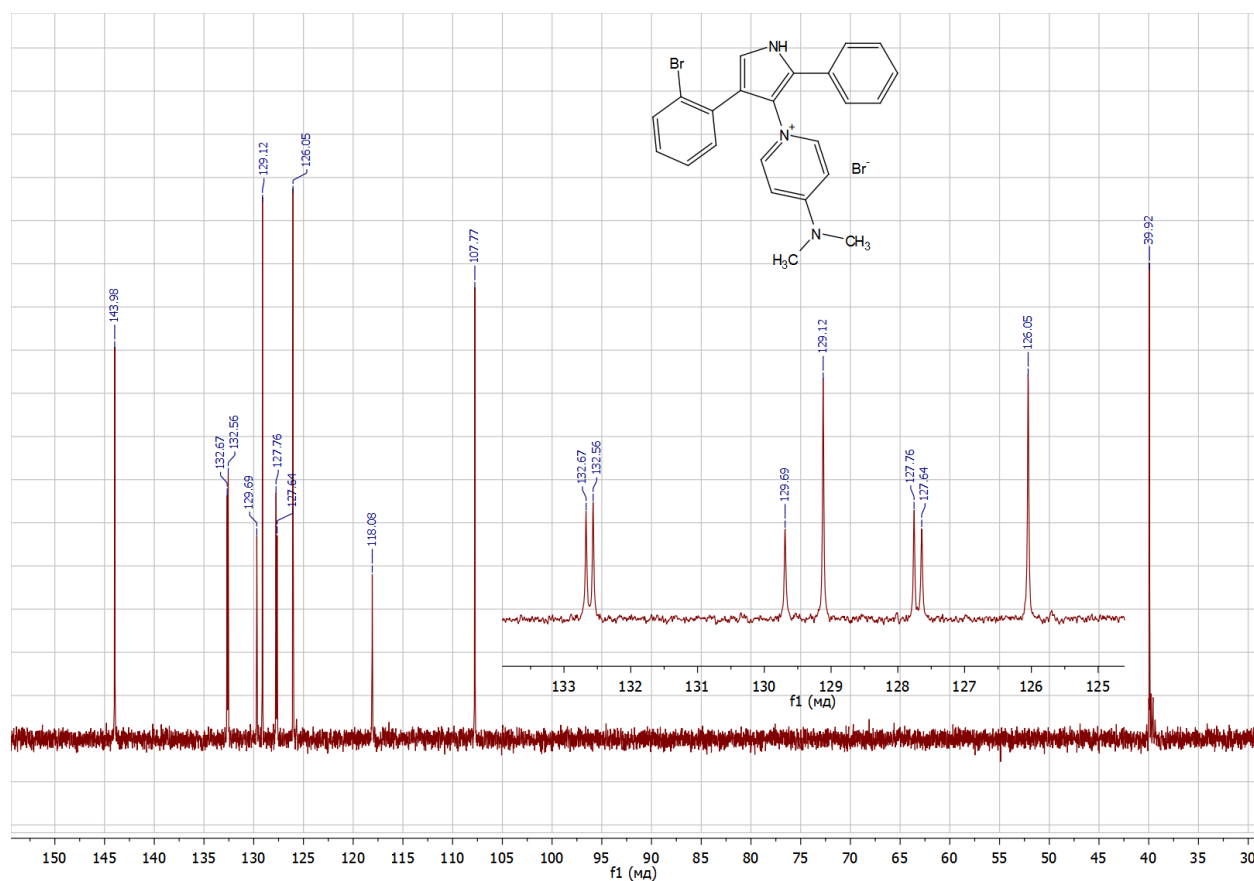



$^1\text{H}$  NMR (400 MHz,  $\text{DMSO-}d_6$ ) of 1-(4-(2-bromophenyl)-2-phenyl-1*H*-pyrrol-3-yl)-4-phenylpyridin-1-ium bromide (**1q**)

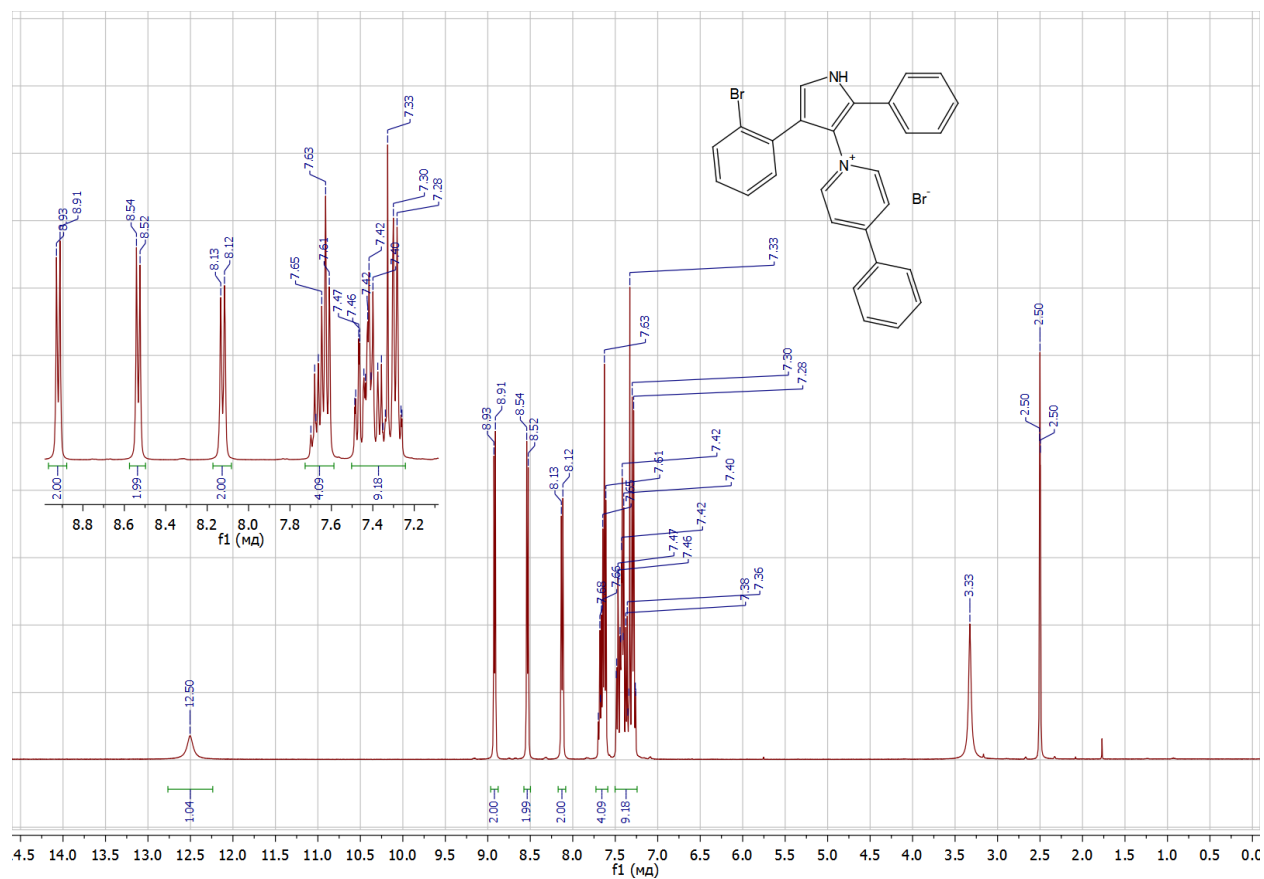

$^{13}\text{C}\{^1\text{H}\}$  NMR (101 MHz,  $\text{DMSO-}d_6$ ) of 1-(4-(2-bromophenyl)-2-phenyl-1*H*-pyrrol-3-yl)-4-phenylpyridin-1-ium bromide (**1q**)

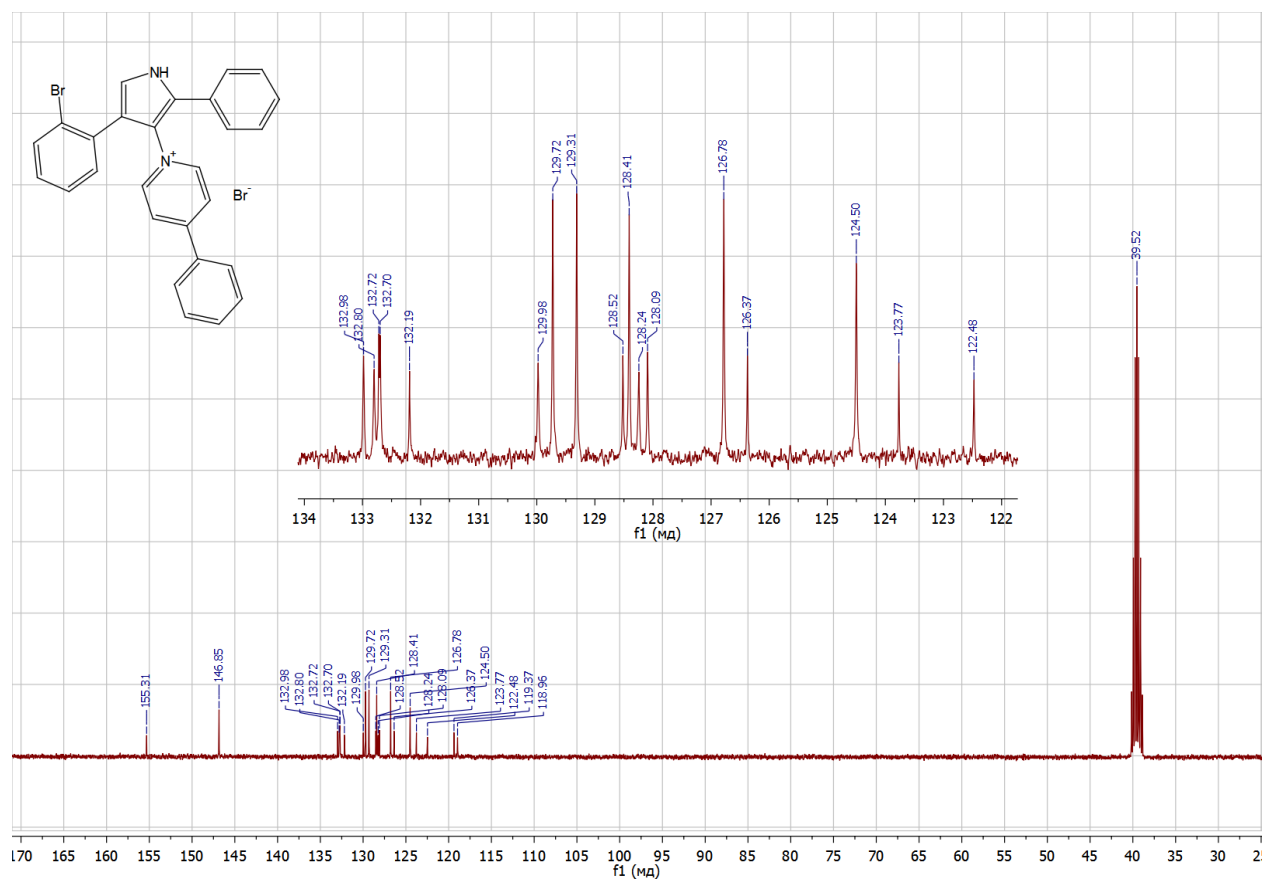

$^{13}\text{C}$  DEPT135 NMR (101 MHz,  $\text{DMSO-}d_6$ ) of 1-(4-(2-bromophenyl)-2-phenyl-1*H*-pyrrol-3-yl)-4-phenylpyridin-1-ium bromide (**1q**)

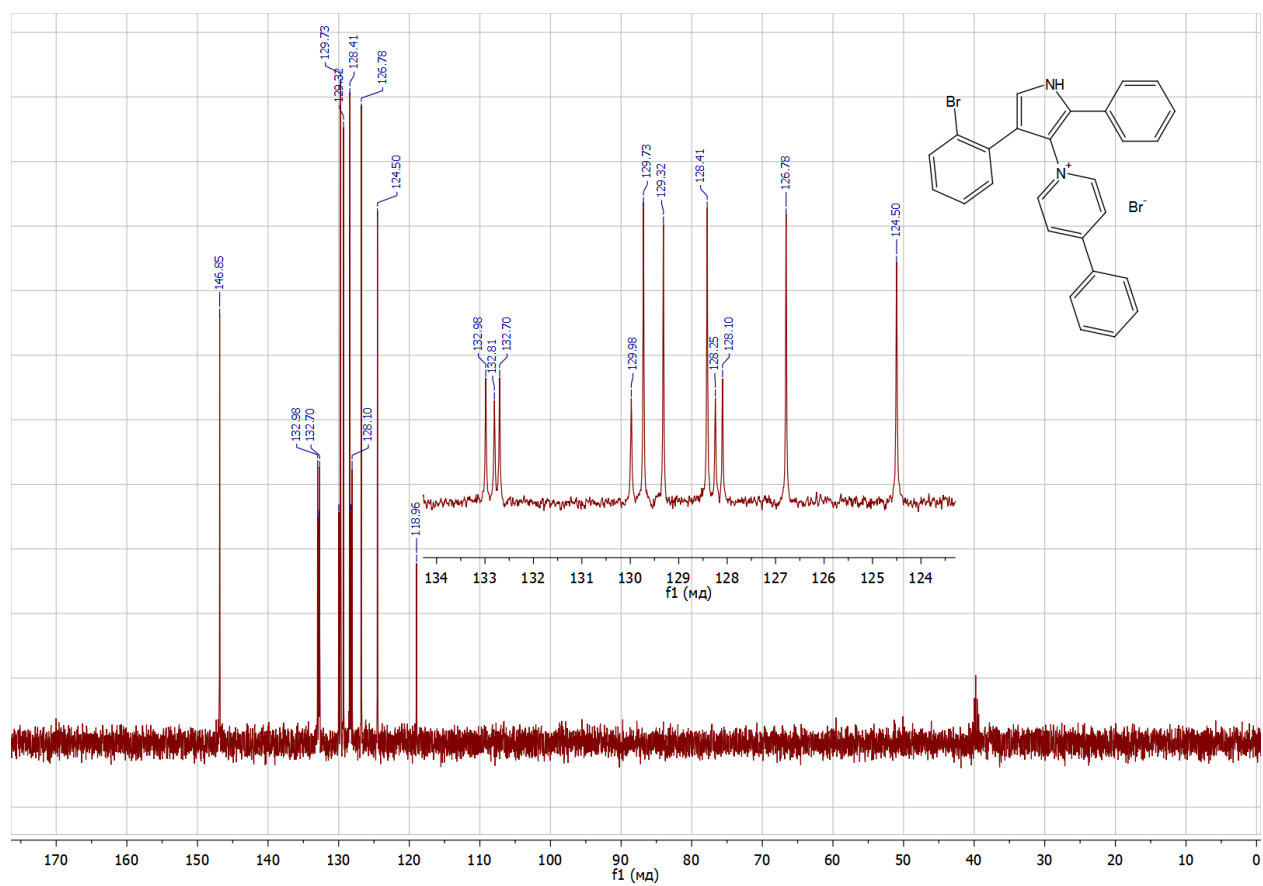

$^1\text{H}$  NMR (400 MHz,  $\text{DMSO-}d_6$ ) of 1-(4-(2-bromophenyl)-2-phenyl-1*H*-pyrrol-3-yl)-4-(4-methoxyphenyl)pyridin-1-ium bromide (**1r**)

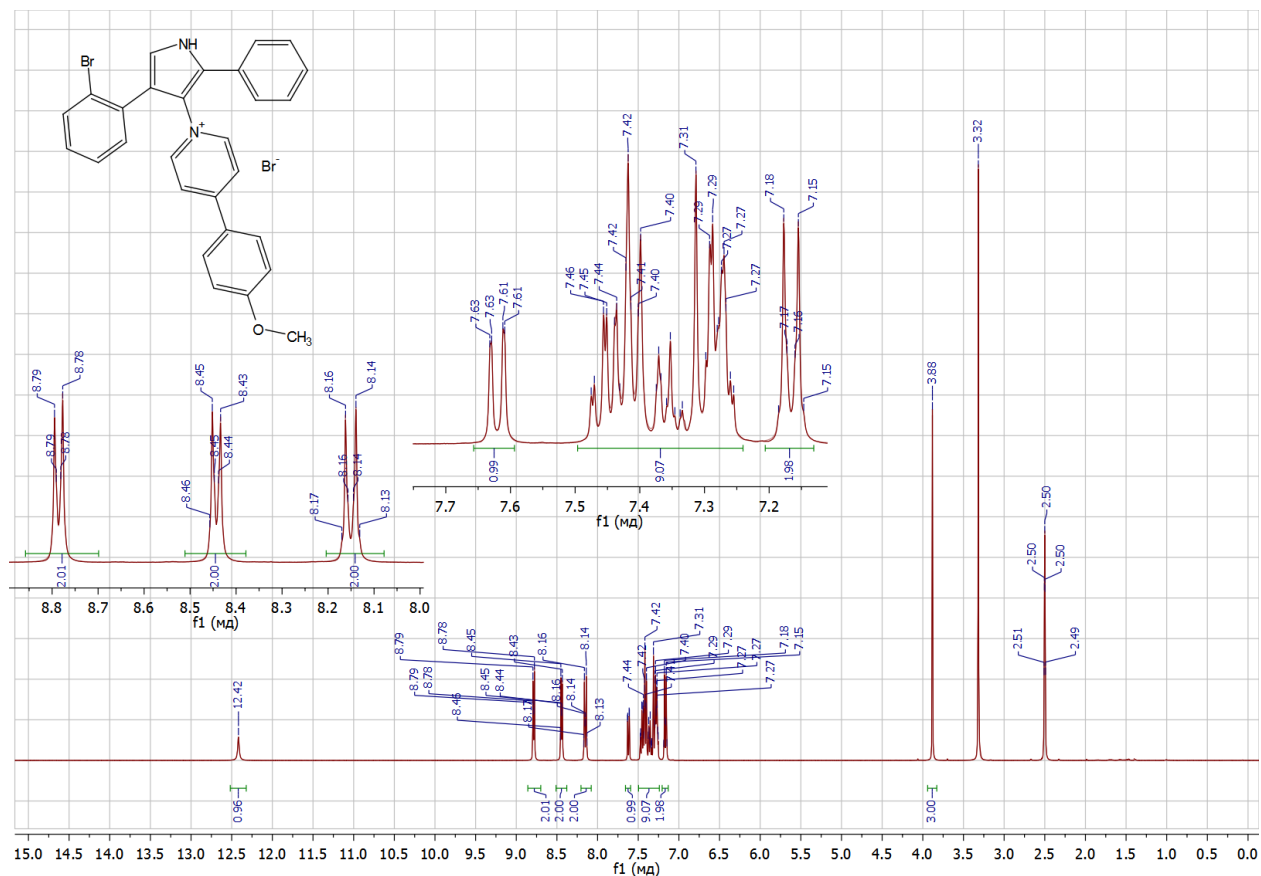

$^{13}\text{C}\{^1\text{H}\}$  NMR (101 MHz,  $\text{DMSO-}d_6$ ) of 1-(4-(2-bromophenyl)-2-phenyl-1*H*-pyrrol-3-yl)-4-(4-methoxyphenyl)pyridin-1-ium bromide (**1r**)

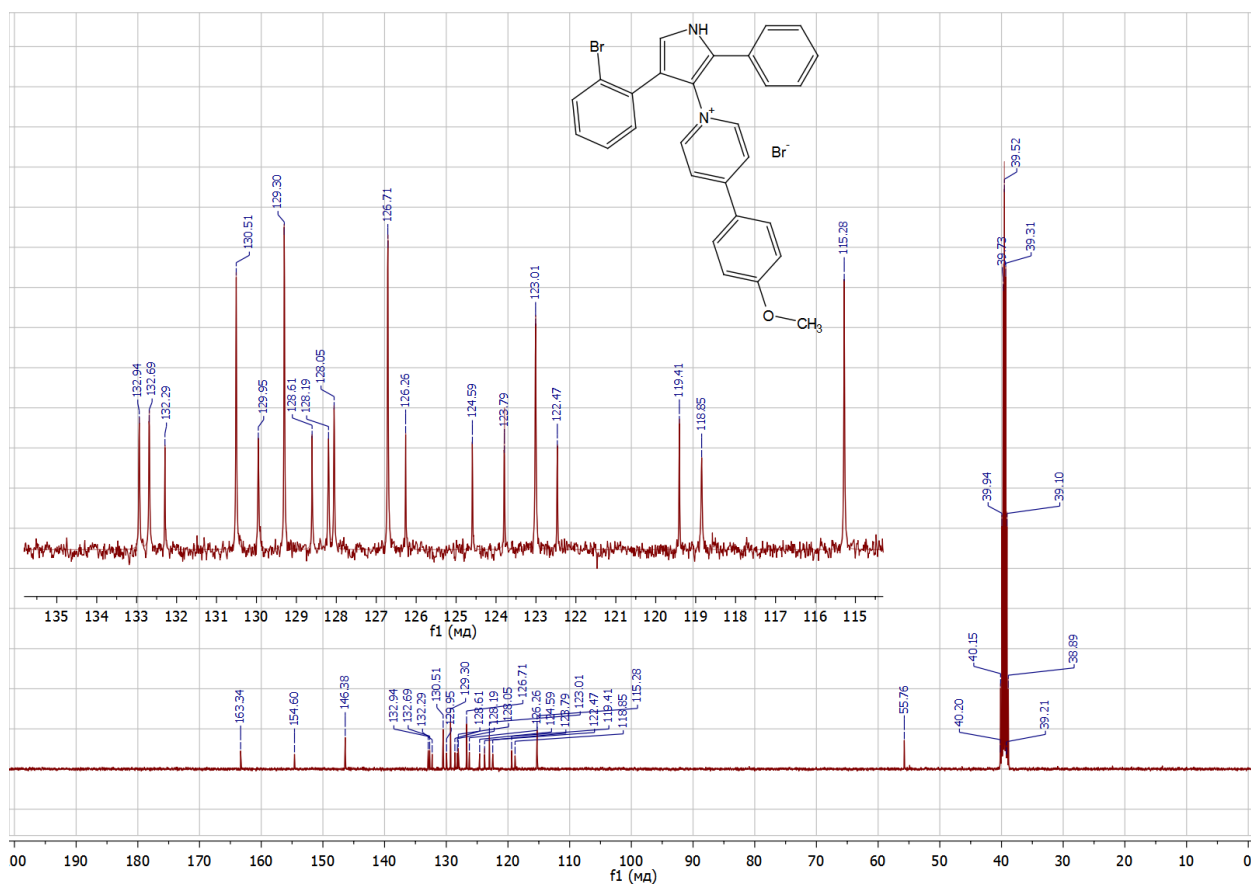

$^{13}\text{C}$  DEPT135 NMR (101 MHz,  $\text{DMSO}-d_6$ ) of 1-(4-(2-bromophenyl)-2-phenyl-1*H*-pyrrol-3-yl)-4-(4-methoxyphenyl)pyridin-1-ium bromide (**1r**)

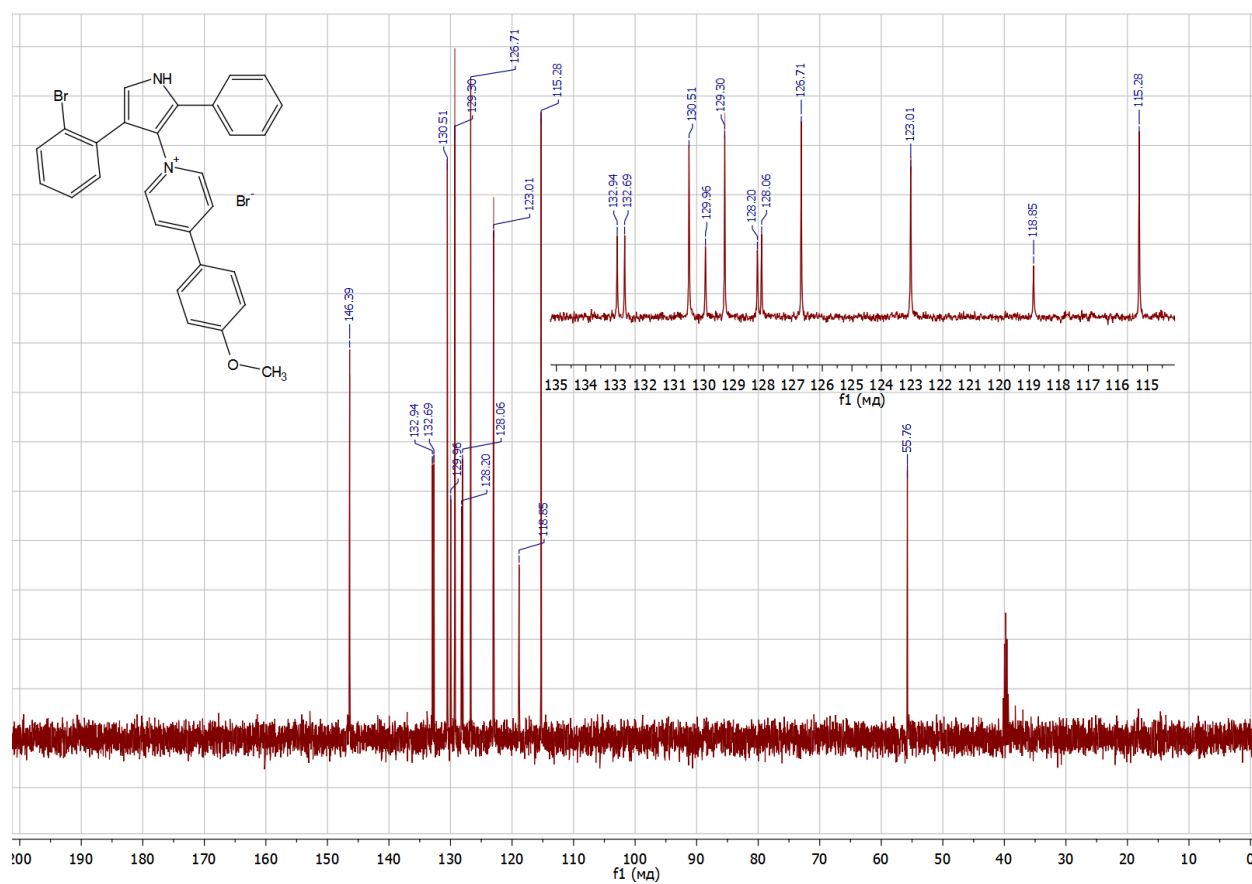

$^1\text{H}$  NMR (400 MHz,  $\text{DMSO}-d_6$ ) of 1-(4-(2-bromophenyl)-2-phenyl-1*H*-pyrrol-3-yl)-3,5-dimethylpyridin-1-ium bromide (**1s**)

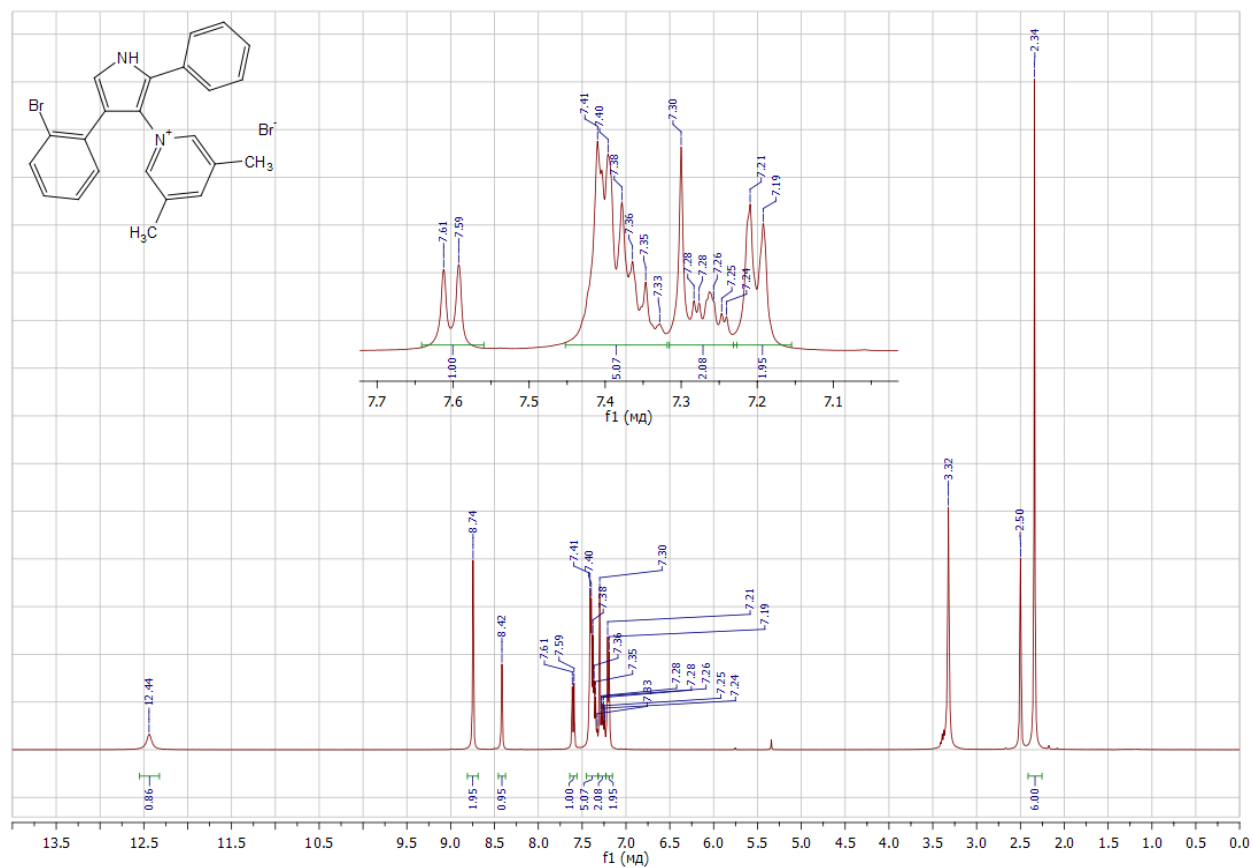

$^{13}\text{C}\{^1\text{H}\}$  NMR (101 MHz,  $\text{DMSO}-d_6$ ) of 1-(4-(2-bromophenyl)-2-phenyl-1*H*-pyrrol-3-yl)-3,5-dimethylpyridin-1-ium bromide (**1s**)

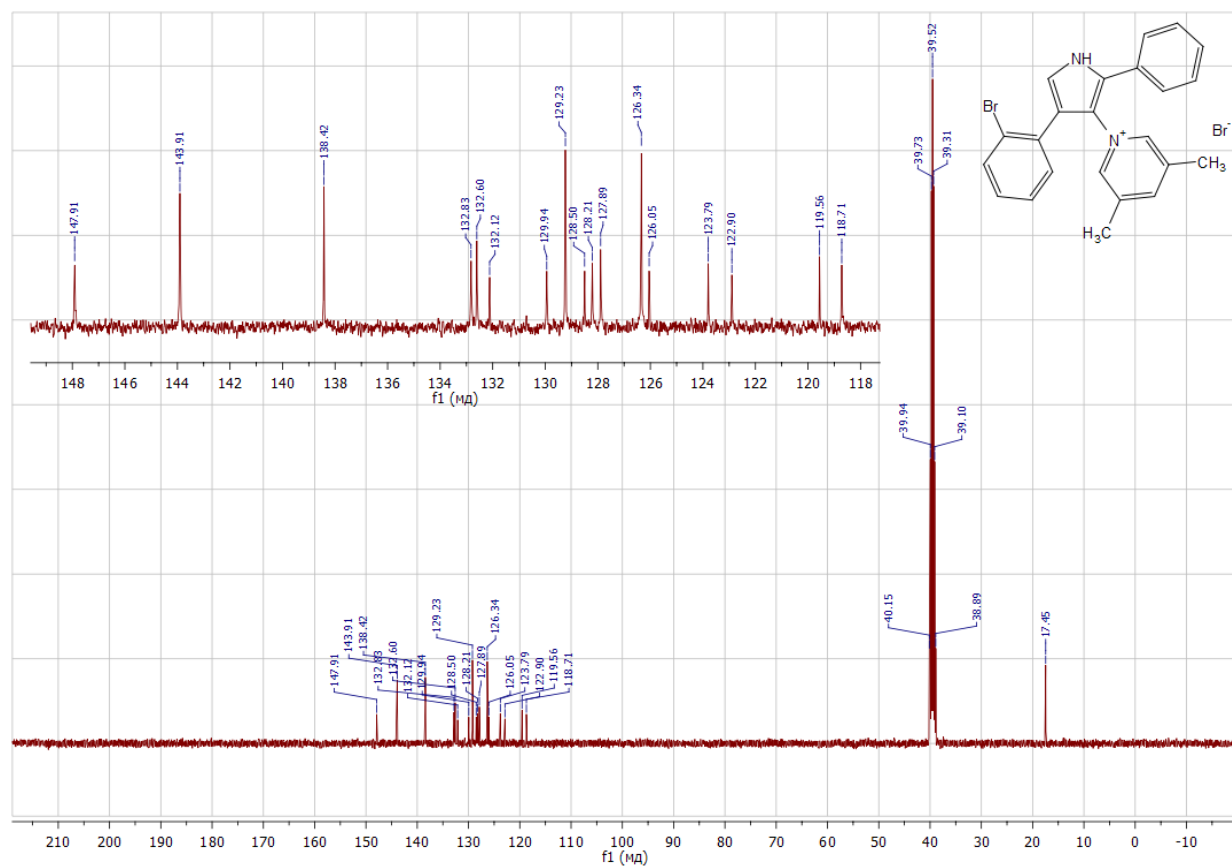

$^{13}\text{C}$  DEPT135 NMR (101 MHz,  $\text{DMSO-}d_6$ ) of 1-(4-(2-bromophenyl)-2-phenyl-1*H*-pyrrol-3-yl)-3,5-dimethylpyridin-1-ium bromide (**1s**)

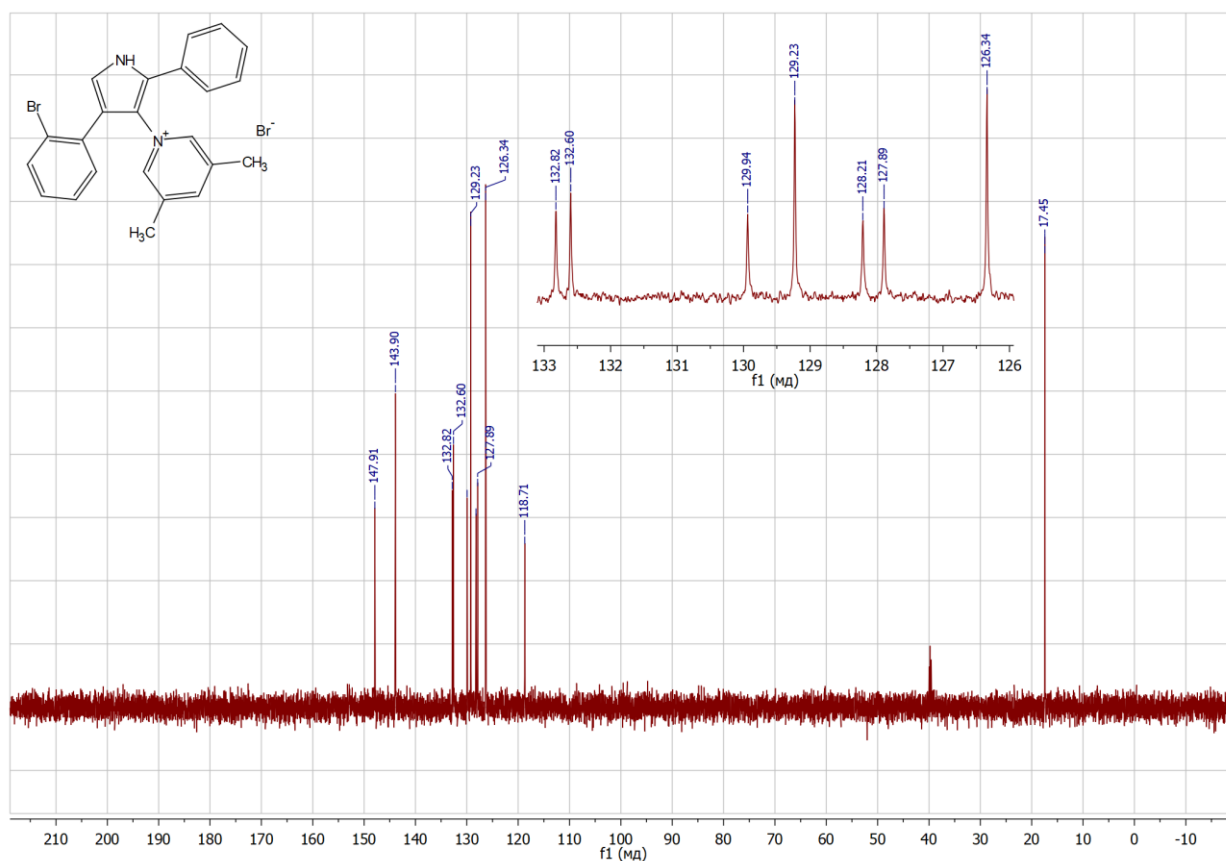

$^1\text{H}$  NMR (400 MHz,  $\text{DMSO}-d_6$ ) of 2-(4-(2-bromophenyl)-2-phenyl-1*H*-pyrrol-3-yl)isoquinolin-2-iumbromide (**1t**)

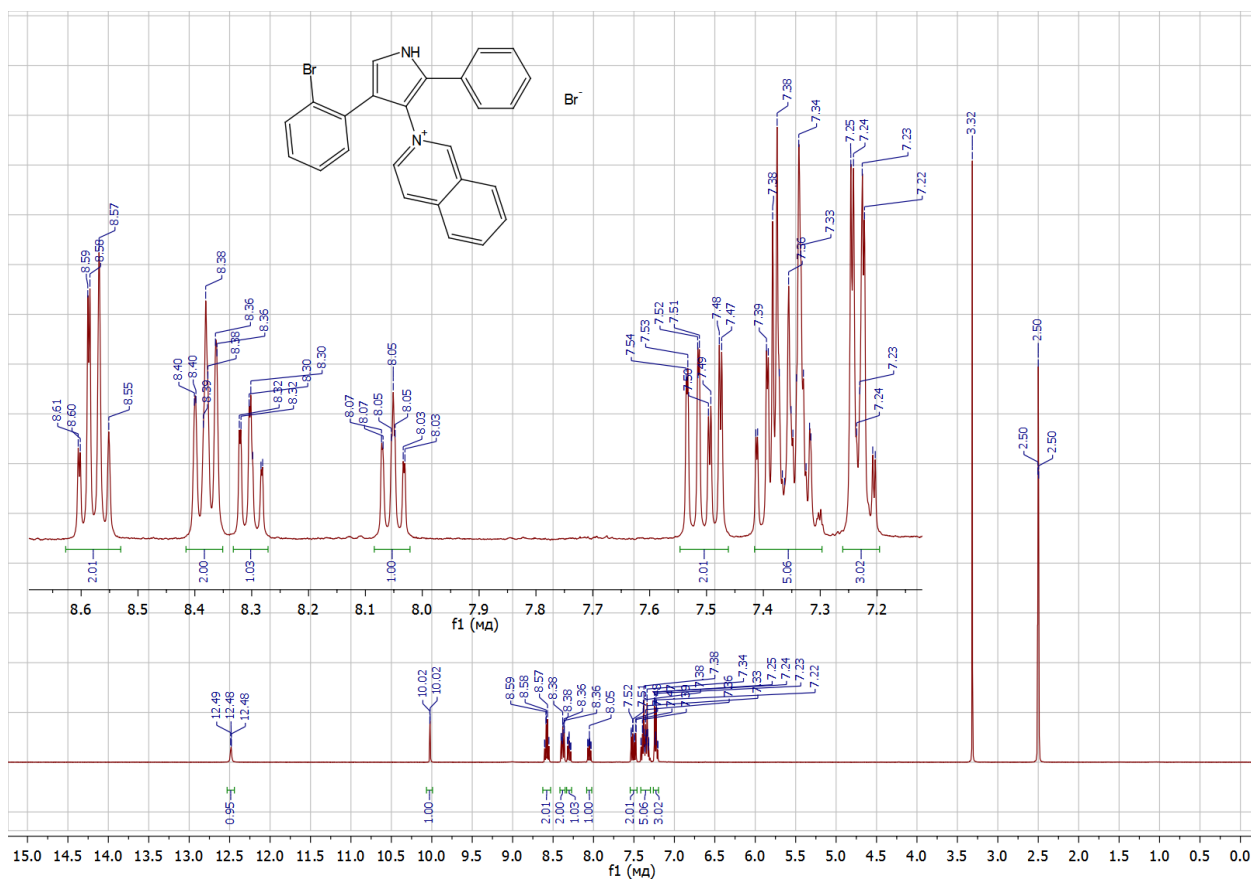

$^{13}\text{C}\{^1\text{H}\}$  NMR (101 MHz,  $\text{DMSO}-d_6$ ) of 2-(4-(2-bromophenyl)-2-phenyl-1*H*-pyrrol-3-yl)isoquinolin-2-iumbromide (**1t**)

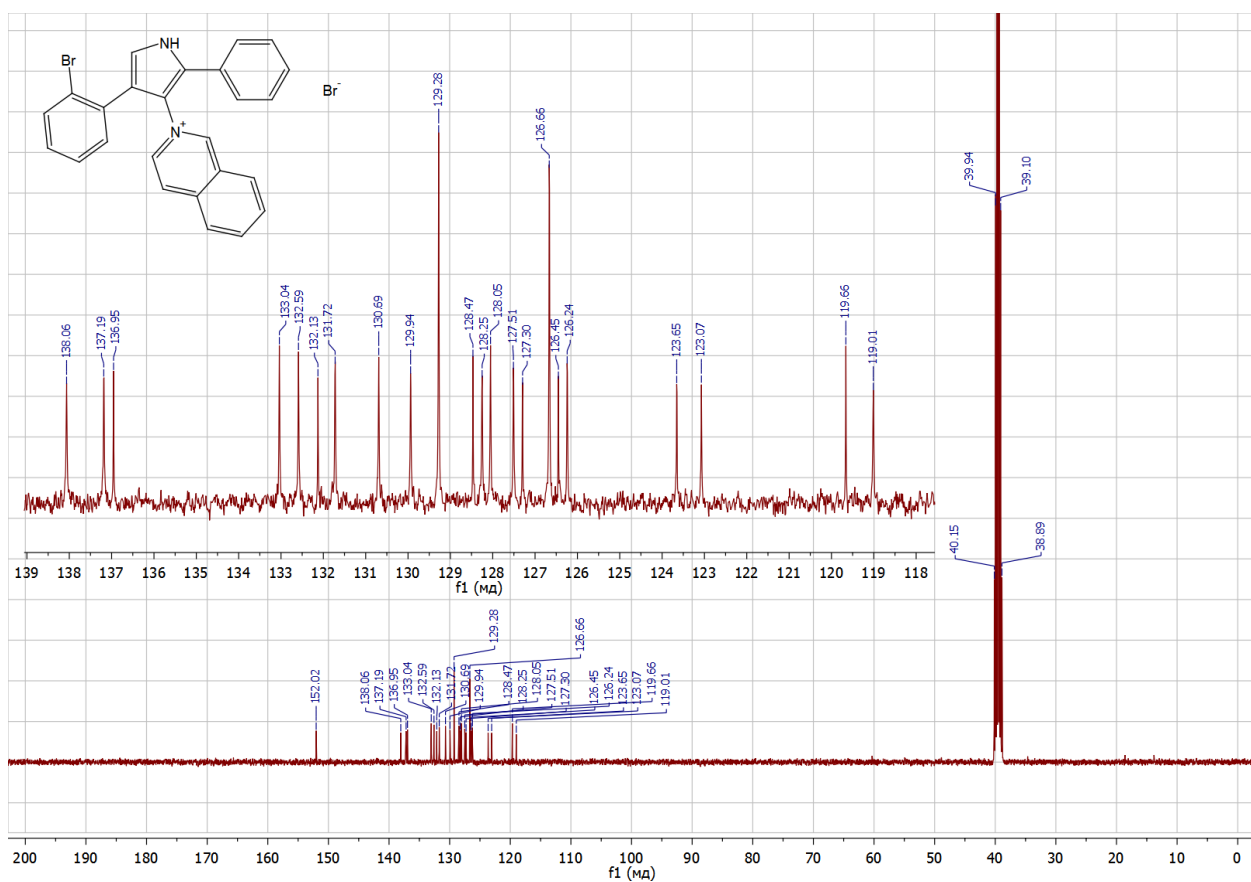

$^{13}\text{C}$  DEPT135 NMR (101 MHz,  $\text{DMSO-}d_6$ ) of 2-(4-(2-bromophenyl)-2-phenyl-1*H*-pyrrol-3-yl)isoquinolin-2-iumbromide (**1t**)

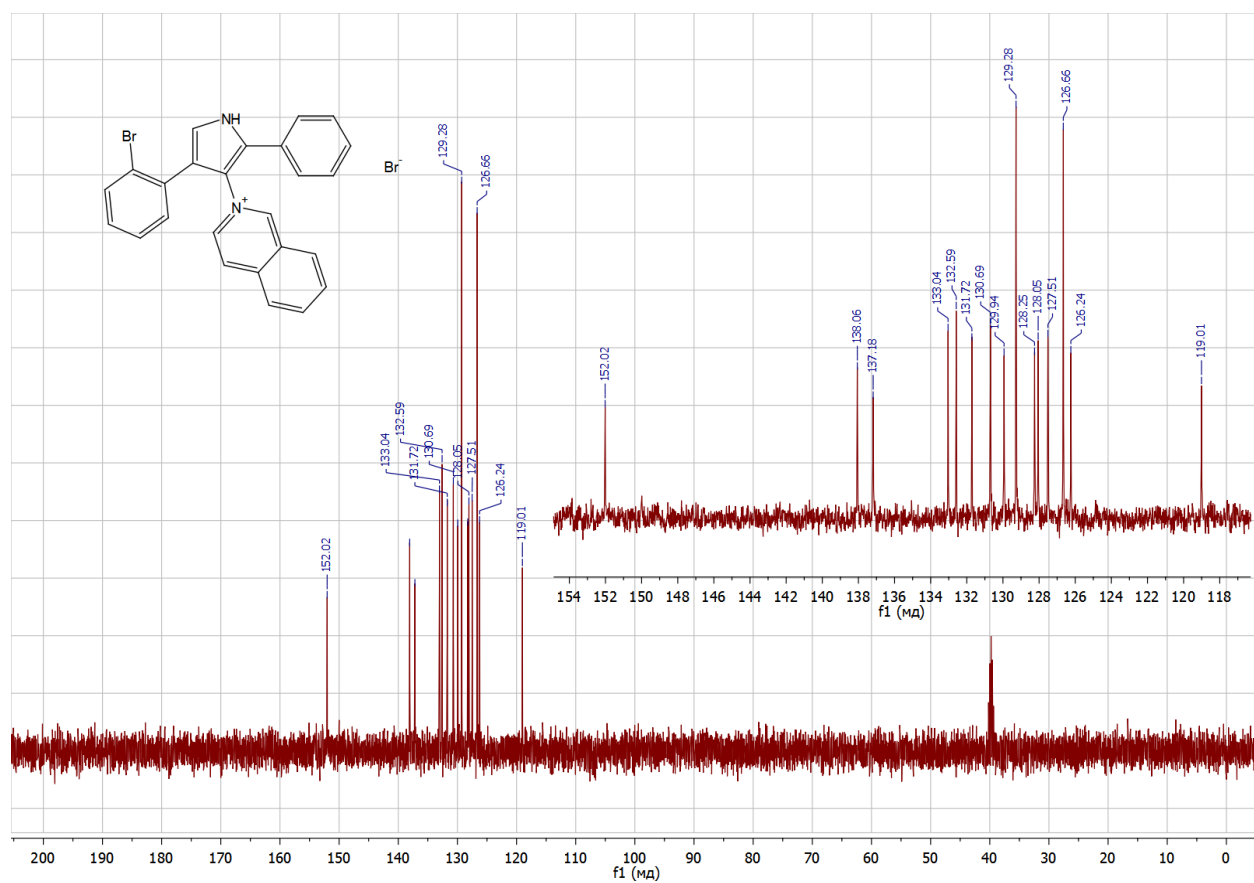



$^1\text{H}$  NMR (400 MHz,  $\text{DMSO}-d_6$ ) of 1-(4-(2-bromophenyl)-2-phenyl-1*H*-pyrrol-3-yl)-4-(methoxycarbonyl)pyridin-1-ium bromide (**1u**)

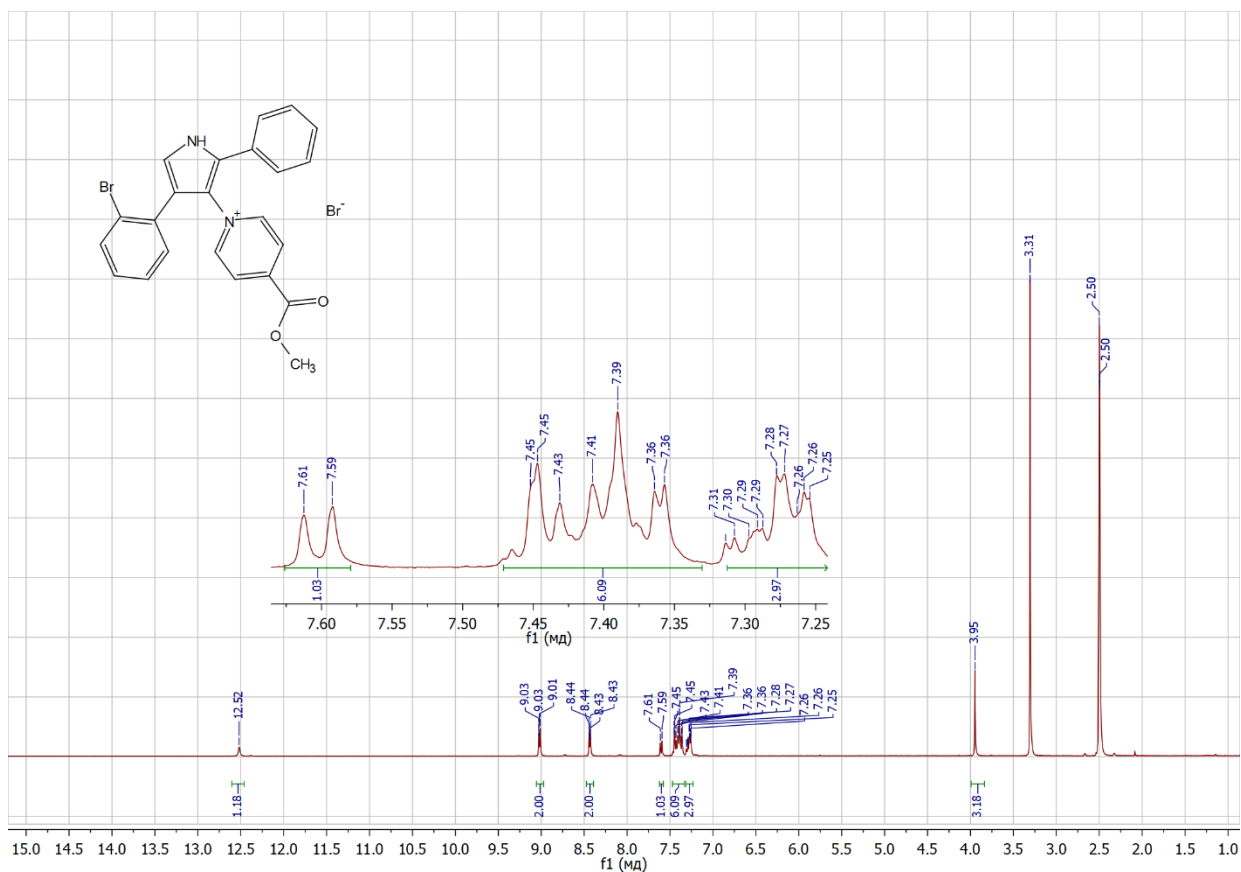

$^{13}\text{C}\{^1\text{H}\}$  NMR (101 MHz,  $\text{DMSO}-d_6$ ) of 1-(4-(2-bromophenyl)-2-phenyl-1*H*-pyrrol-3-yl)-4-(methoxycarbonyl)pyridin-1-ium bromide (**1u**)

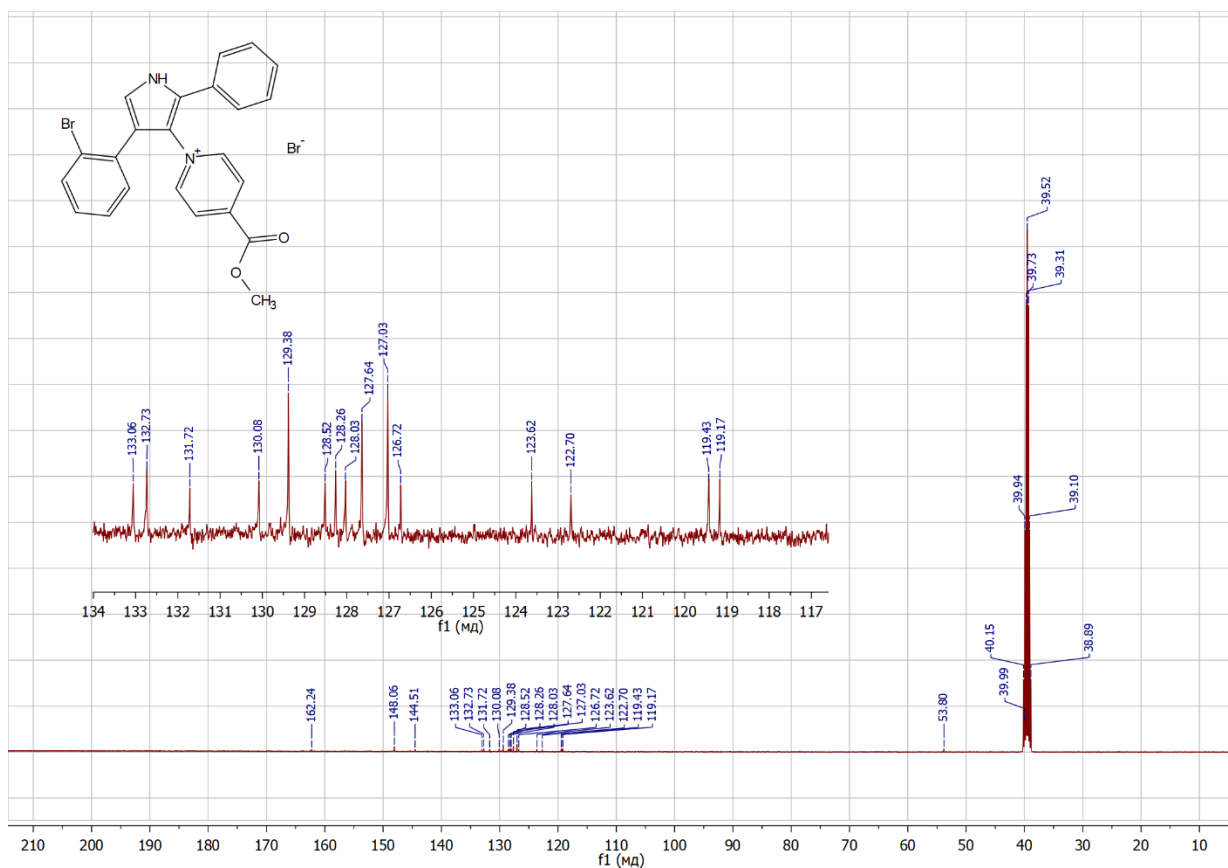

$^{13}\text{C}$  DEPT135 NMR (101 MHz,  $\text{DMSO-}d_6$ ) of 1-(4-(2-bromophenyl)-2-phenyl-1*H*-pyrrol-3-yl)-4-(methoxycarbonyl)pyridin-1-ium bromide (**1u**)

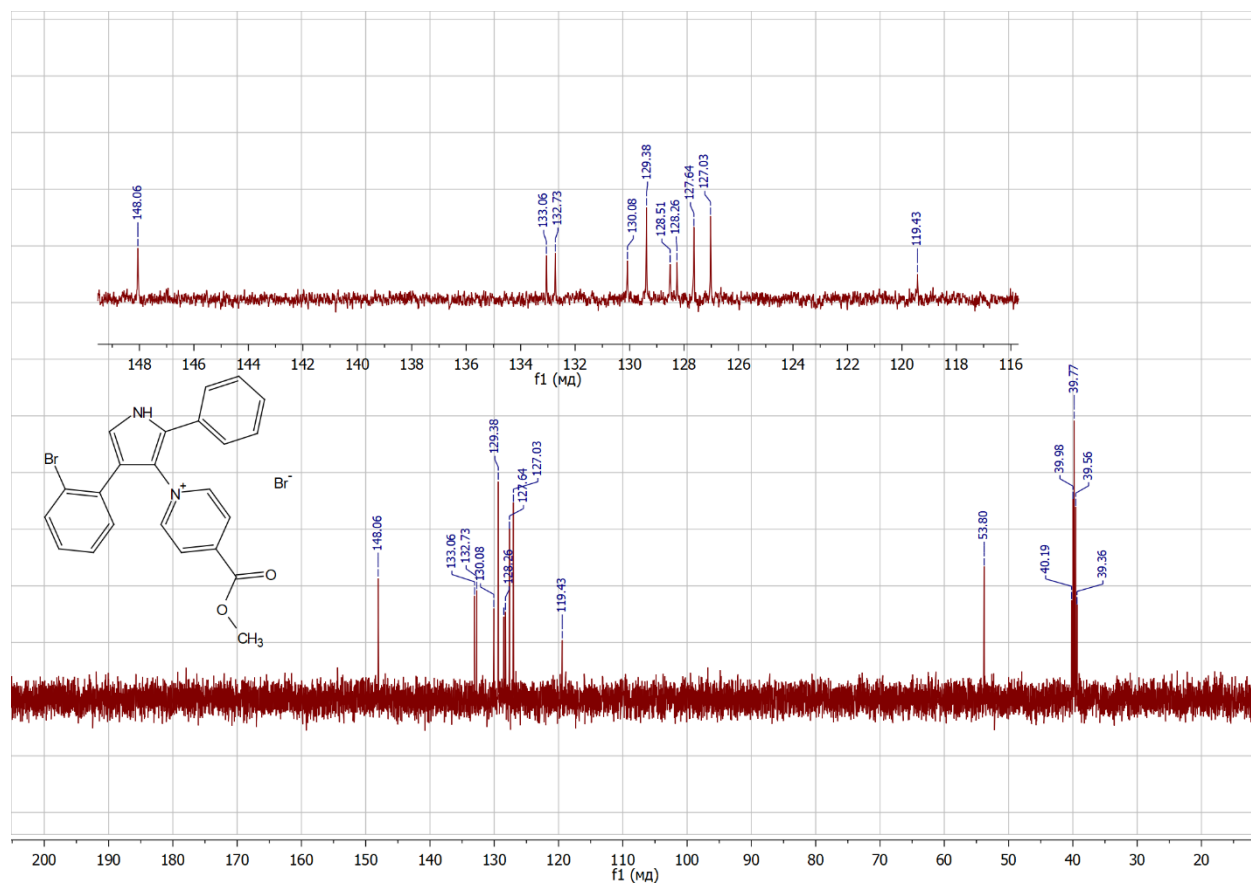

$^1\text{H}$  NMR (400 MHz,  $\text{DMSO}-d_6$ ) of 1-(4-(2-bromophenyl)-2-phenyl-1*H*-pyrrol-3-yl)-4-cyanopyridin-1-ium bromide (**1v**)

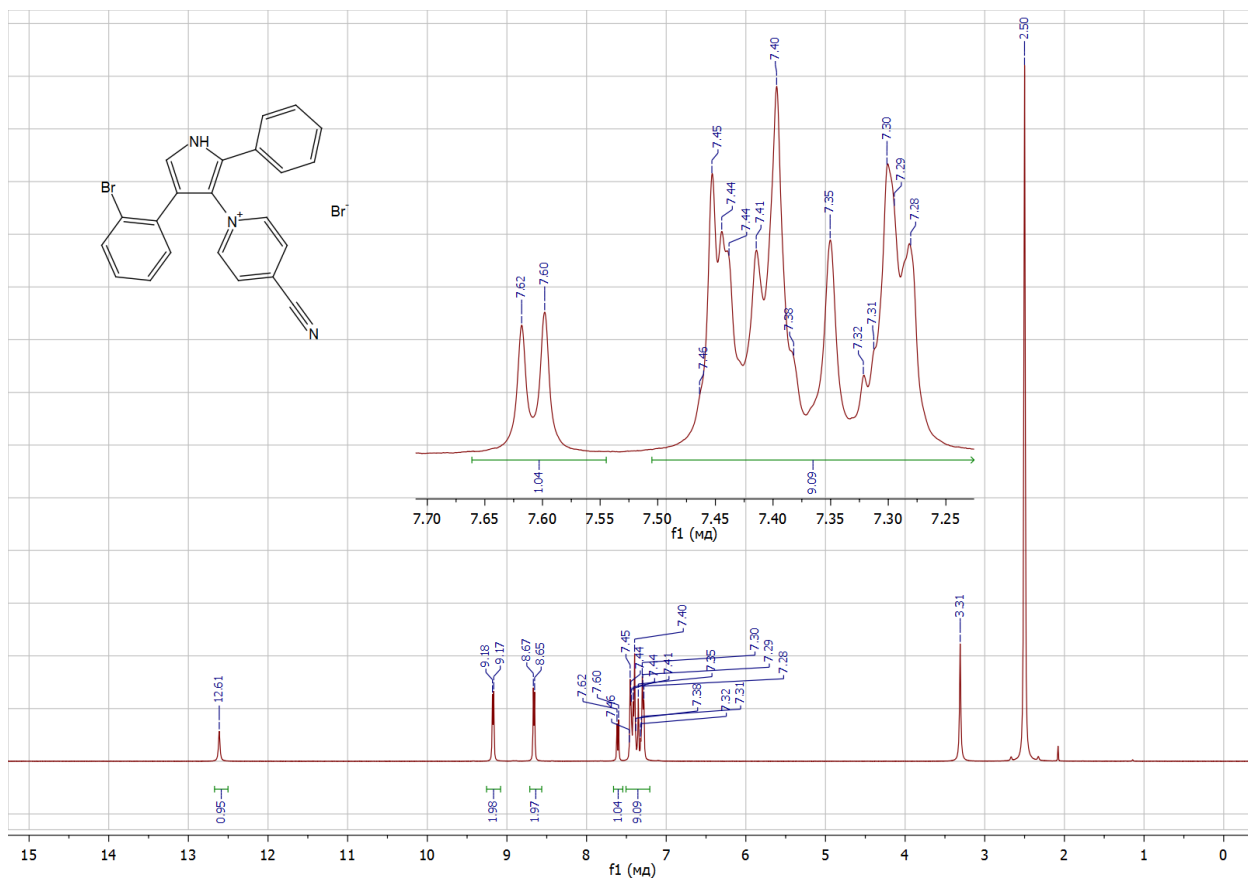

$^{13}\text{C}\{^1\text{H}\}$  NMR (101 MHz,  $\text{DMSO}-d_6$ ) of 1-(4-(2-bromophenyl)-2-phenyl-1*H*-pyrrol-3-yl)-4-cyanopyridin-1-ium bromide (**1v**)

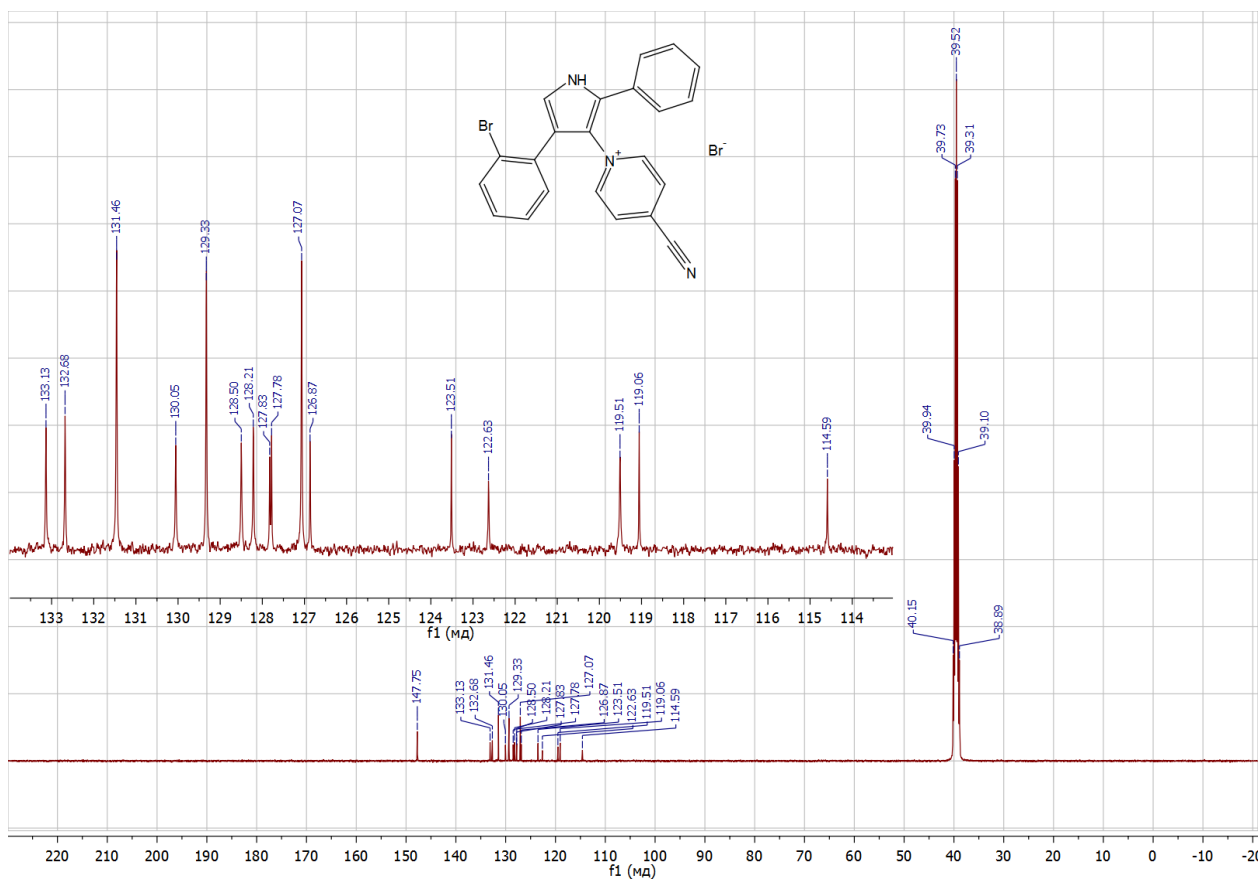

$^{13}\text{C}$  DEPT135 NMR (101 MHz,  $\text{DMSO-}d_6$ ) of 1-(4-(2-bromophenyl)-2-phenyl-1*H*-pyrrol-3-yl)-4-cyanopyridin-1-ium bromide (**1v**)

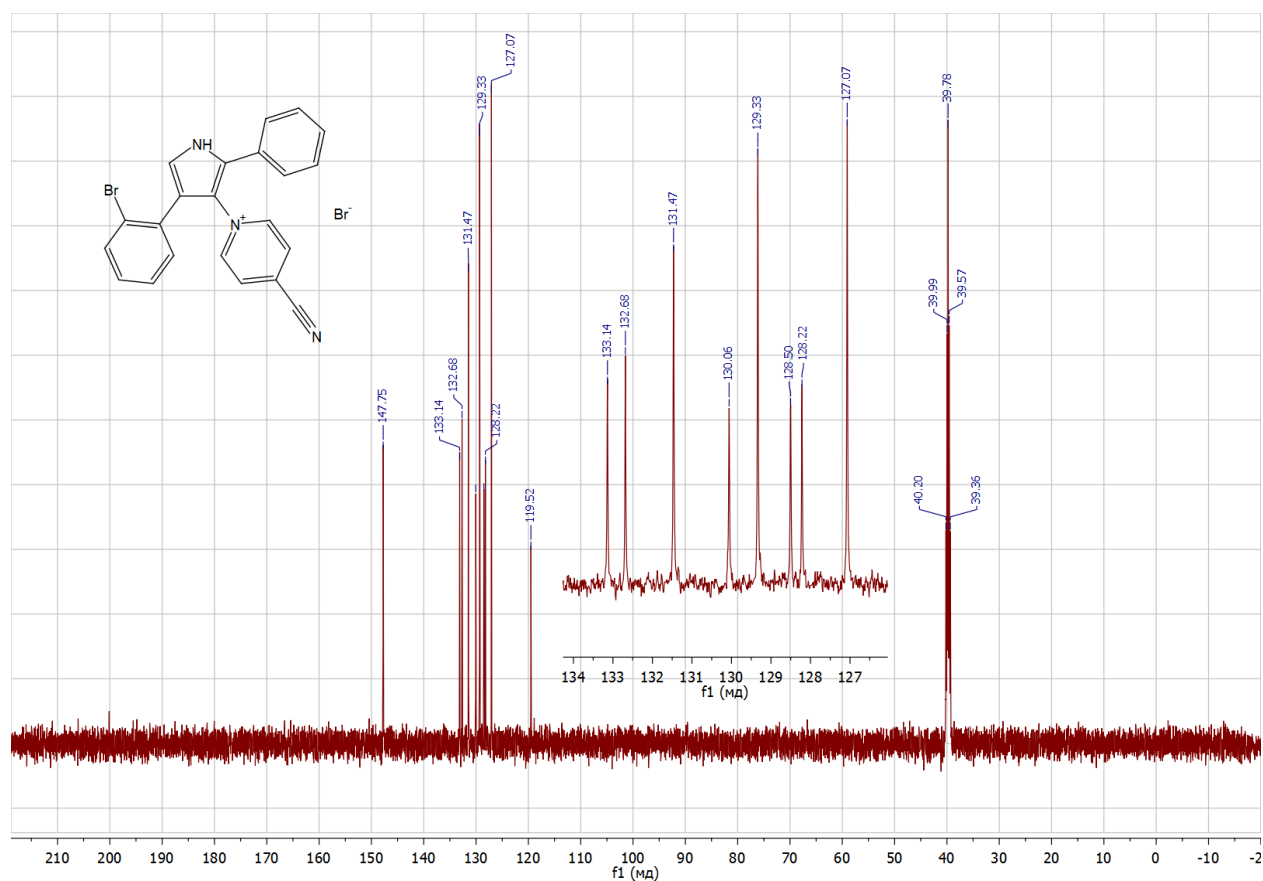

$^1\text{H}$  NMR (400 MHz,  $\text{DMSO}-d_6$ ) of 4-benzoyl-1-(4-(2-bromophenyl)-2-phenyl-1*H*-pyrrol-3-yl)pyridin-1-ium bromide (**1w**)

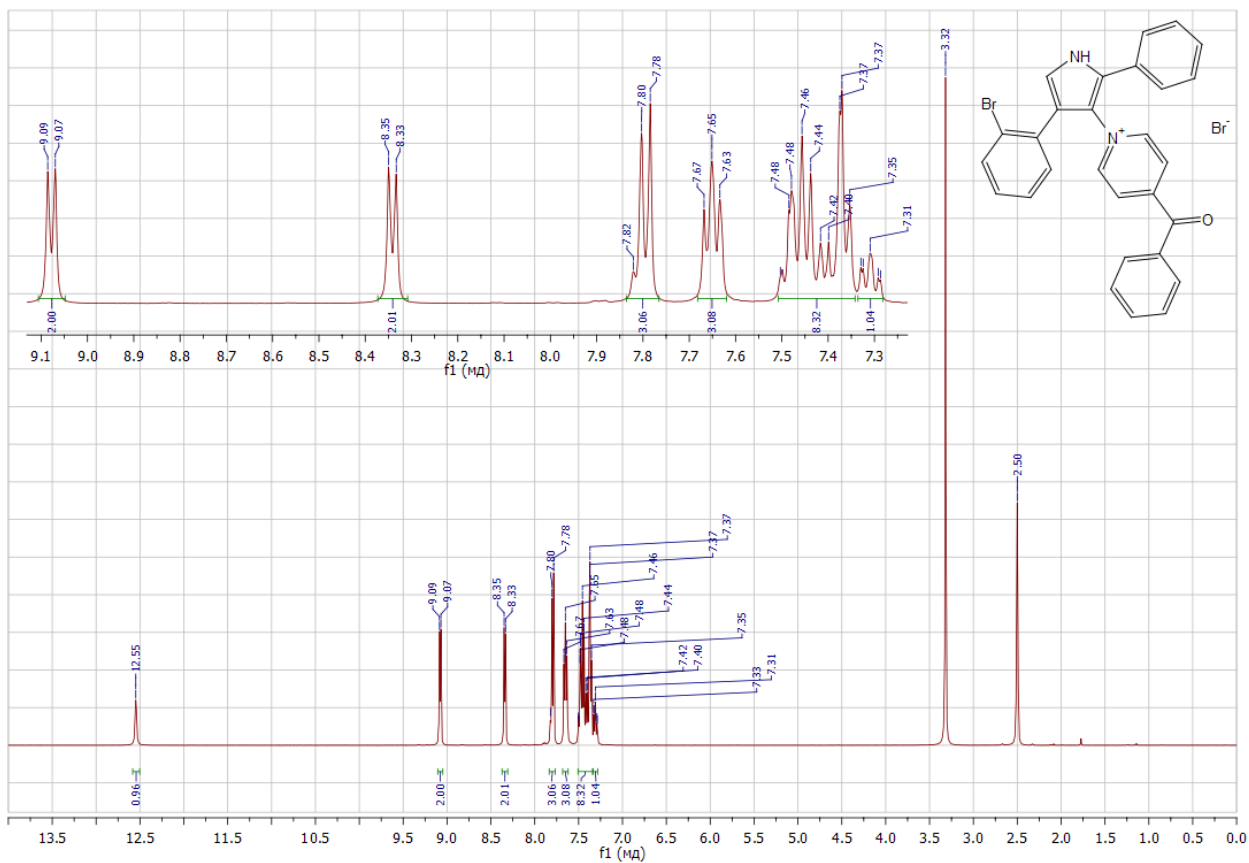

$^{13}\text{C}\{^1\text{H}\}$  NMR (101 MHz,  $\text{DMSO}-d_6$ ) of 4-benzoyl-1-(4-(2-bromophenyl)-2-phenyl-1*H*-pyrrol-3-yl)pyridin-1-ium bromide (**1w**)

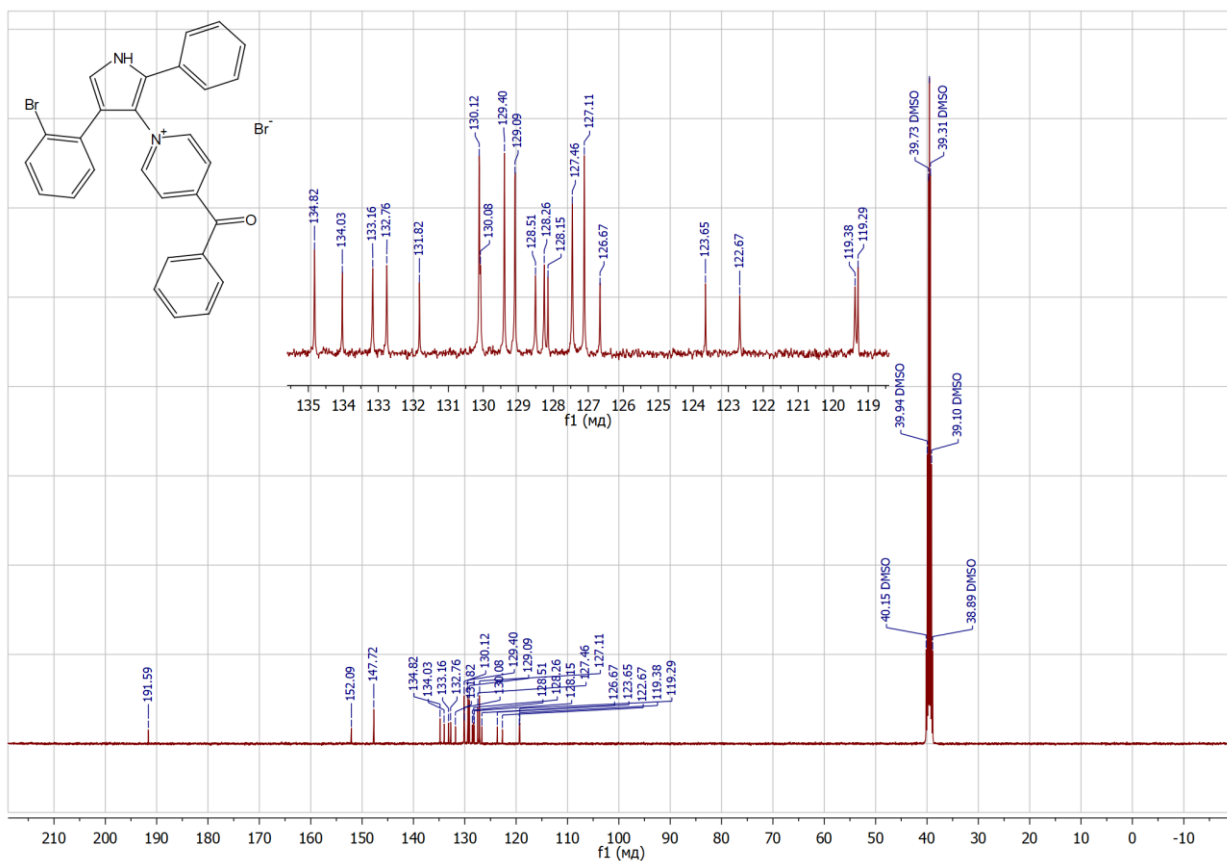

$^{13}\text{C}$  DEPT135 NMR (101 MHz,  $\text{DMSO-}d_6$ ) of 4-benzoyl-1-(4-(2-bromophenyl)-2-phenyl-1*H*-pyrrol-3-yl)pyridin-1-ium bromide (**1w**)

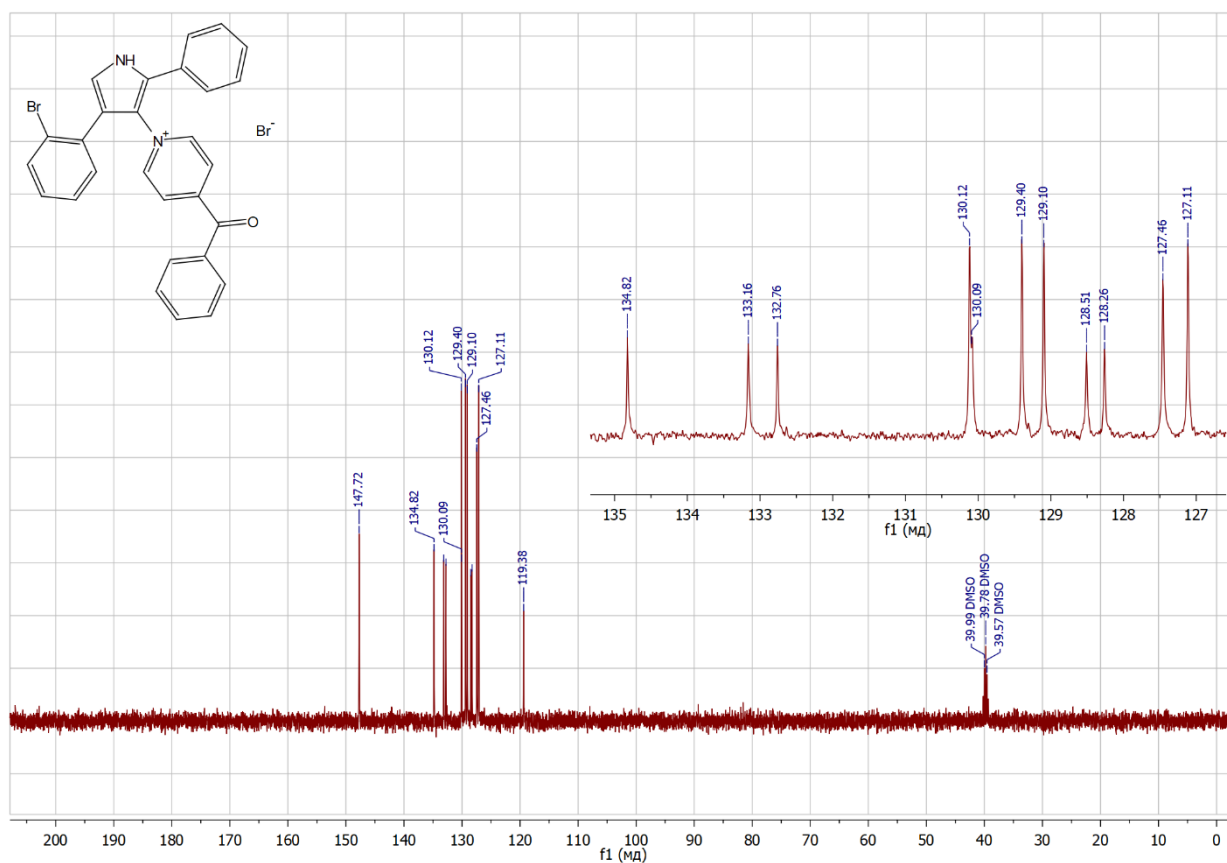

$^1\text{H}$  NMR (400 MHz,  $\text{DMSO-}d_6$ ) of 1-(4-(2-iodophenyl)-2-phenyl-1*H*-pyrrol-3-yl)pyridin-1-ium bromide (**2**)

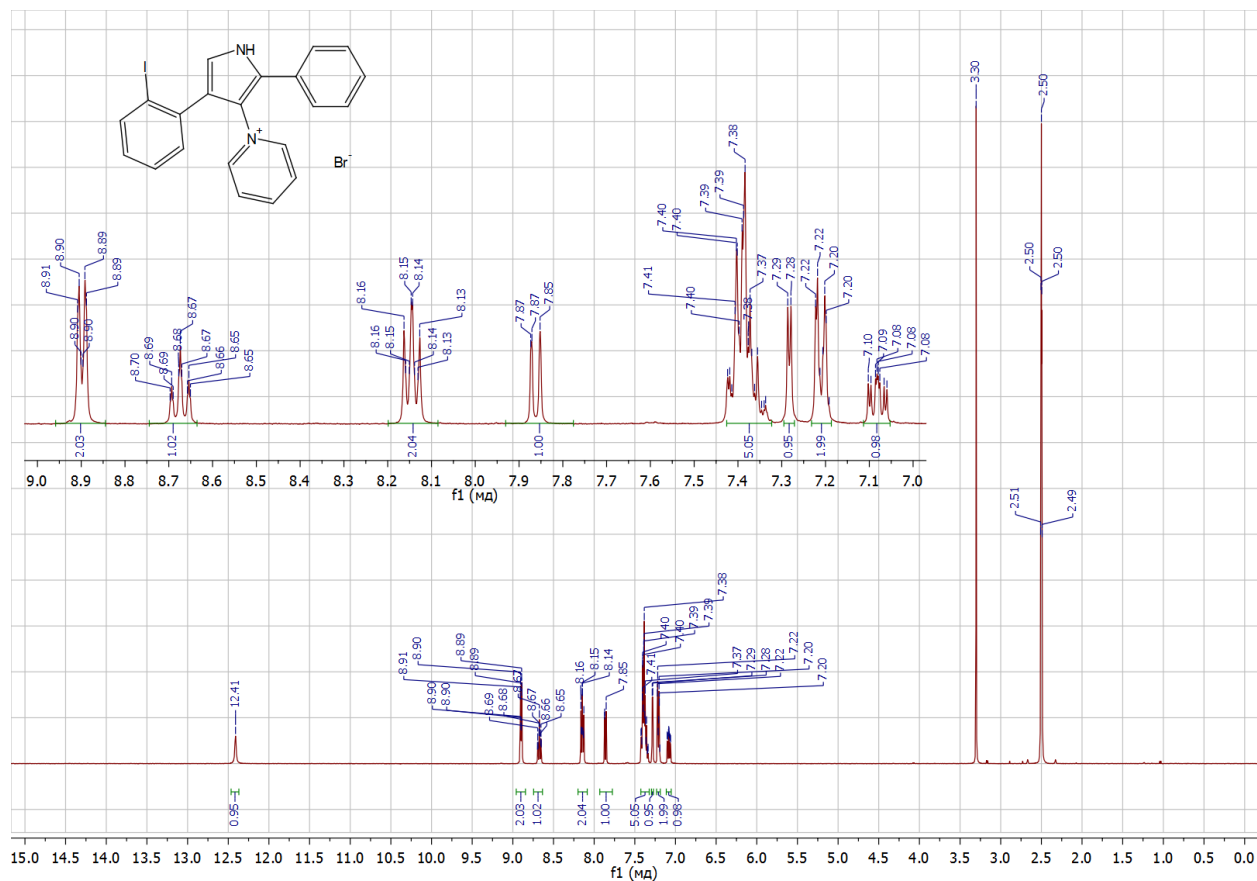

$^{13}\text{C}\{^1\text{H}\}$  NMR (101 MHz,  $\text{DMSO-}d_6$ ) of 1-(4-(2-iodophenyl)-2-phenyl-1*H*-pyrrol-3-yl)pyridin-1-ium bromide (**2**)

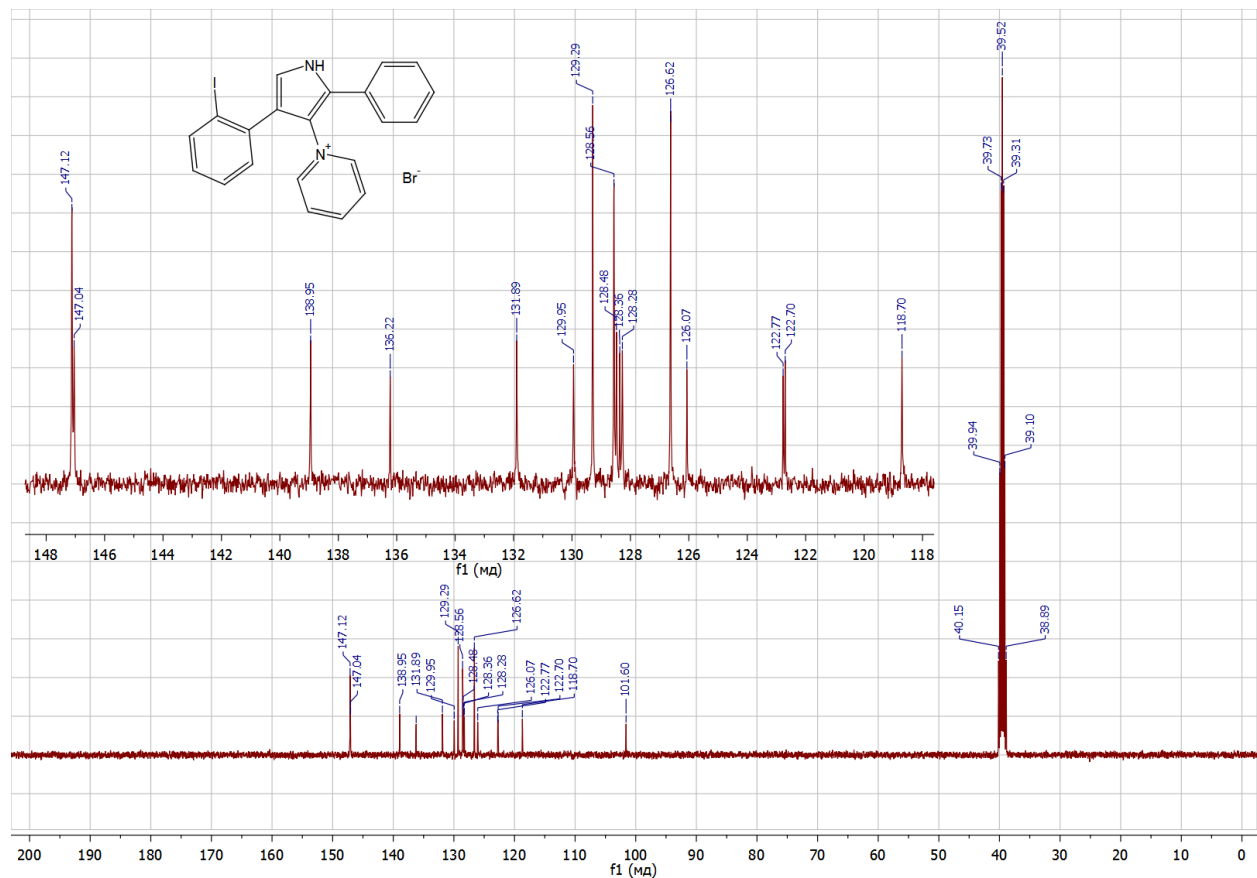

$^{13}\text{C}$  DEPT135 NMR (101 MHz,  $\text{DMSO-}d_6$ ) of 1-(4-(2-iodophenyl)-2-phenyl-1*H*-pyrrol-3-yl)pyridin-1-ium bromide (**2**)

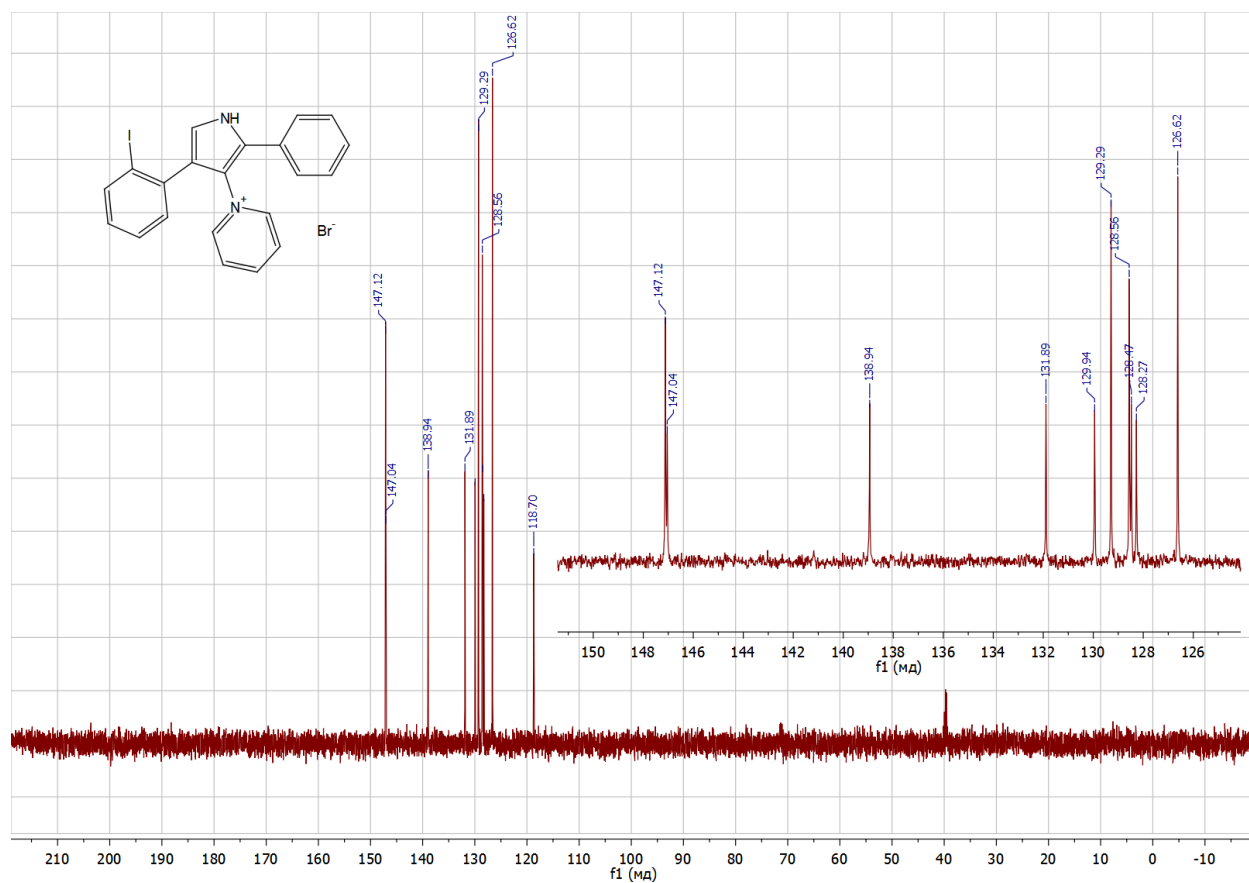



$^1\text{H}$  NMR (400 MHz,  $\text{DMSO-}d_6$ ) of 1-(1-benzyl-4-(2-iodophenyl)-2-phenyl-1*H*-pyrrol-3-yl)pyridin-1-ium bromide (**N-Bn-2**)

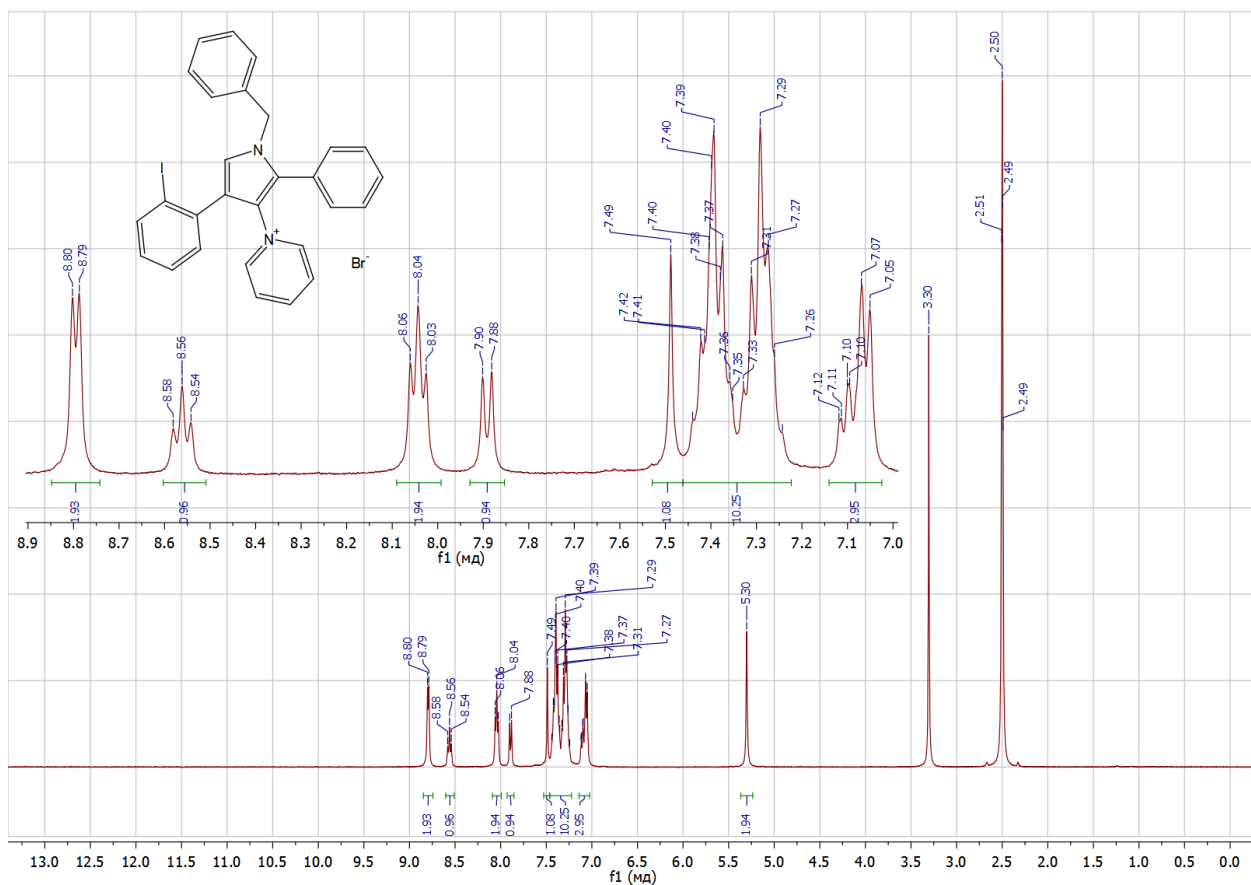

$^{13}\text{C}\{^1\text{H}\}$  NMR (101 MHz,  $\text{DMSO-}d_6$ ) of 1-(1-benzyl-4-(2-iodophenyl)-2-phenyl-1*H*-pyrrol-3-yl)pyridin-1-ium bromide (**N-Bn-2**)

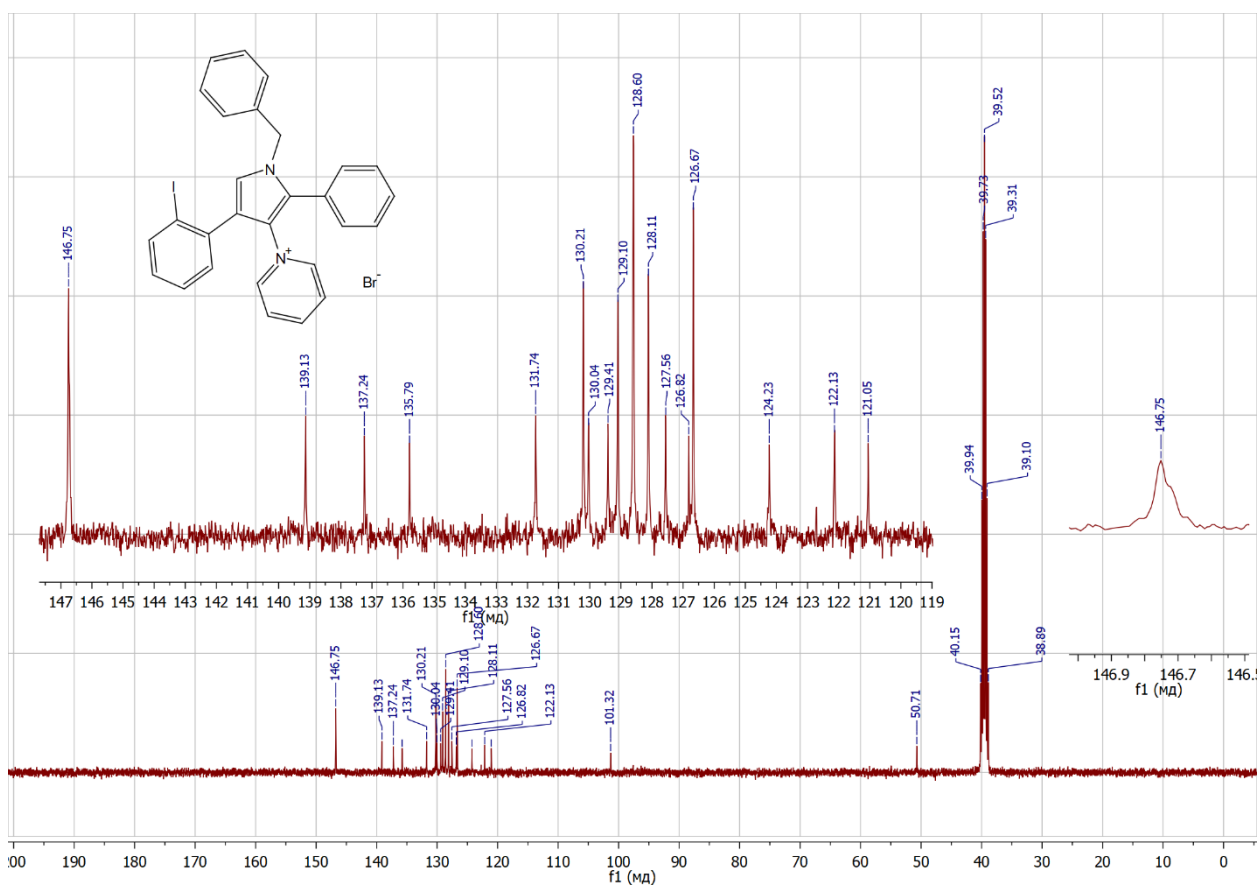

$^{13}\text{C}$  DEPT135 NMR (101 MHz,  $\text{DMSO-}d_6$ ) of 1-(1-benzyl-4-(2-iodophenyl)-2-phenyl-1*H*-pyrrol-3-yl)pyridin-1-ium bromide (**N-Bn-2**)

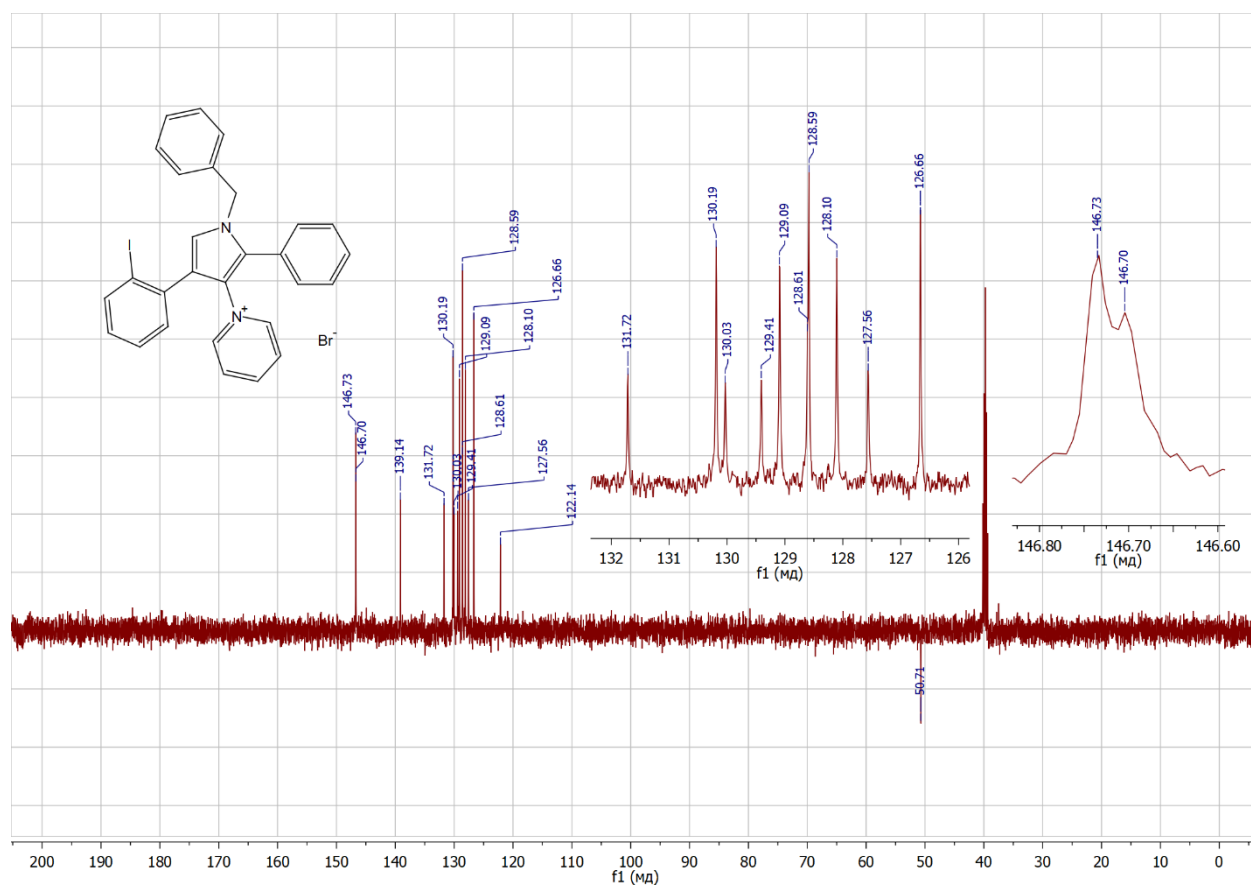

$^1\text{H}$  NMR (400 MHz,  $\text{DMSO-}d_6$ ) of 3-phenylpyrido[2,1-*a*]pyrrolo[3,4-*c*]isoquinolin-2-iumbromide (**3a**)

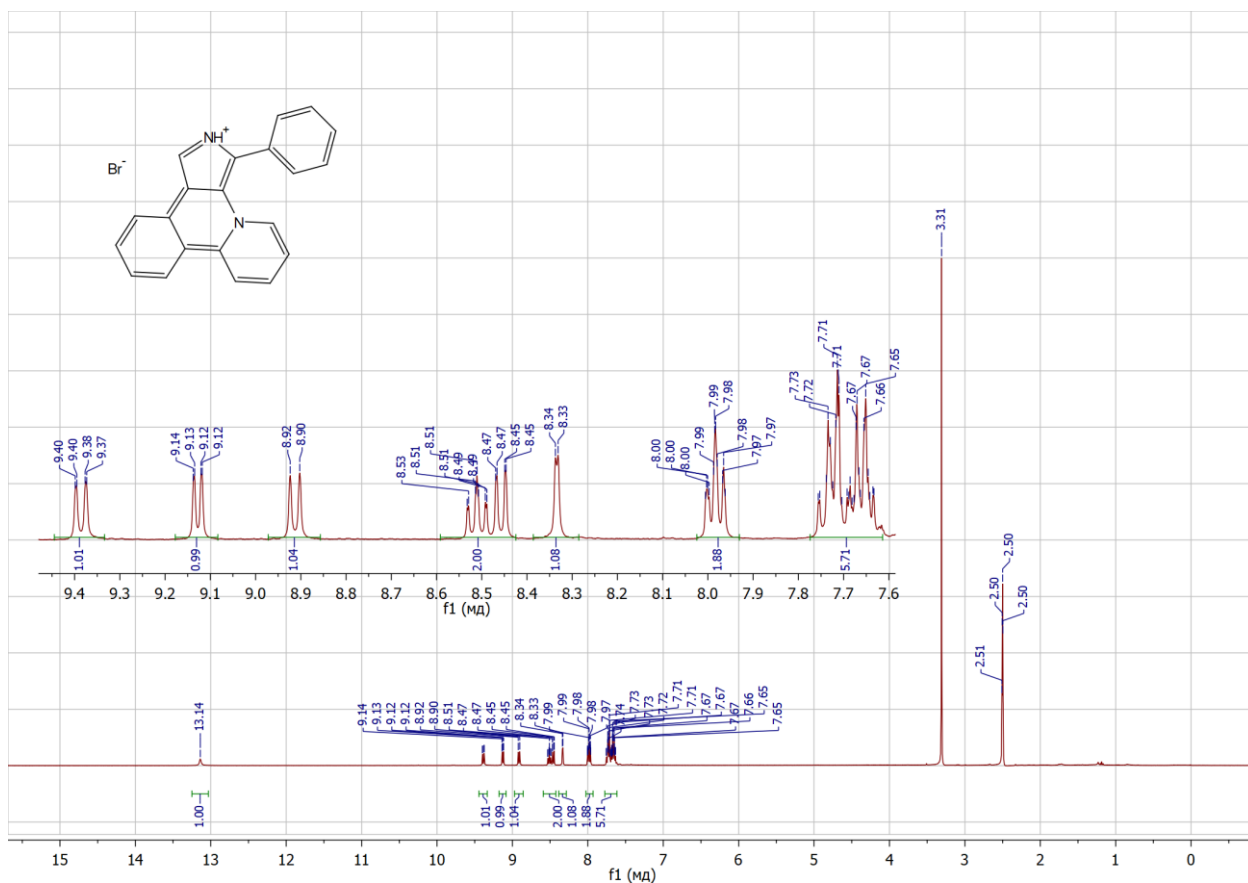

$^{13}\text{C}\{^1\text{H}\}$  NMR (101 MHz,  $\text{DMSO-}d_6$ ) of 3-phenylpyrido[2,1-*a*]pyrrolo[3,4-*c*]isoquinolin-2-iumbromide (**3a**)

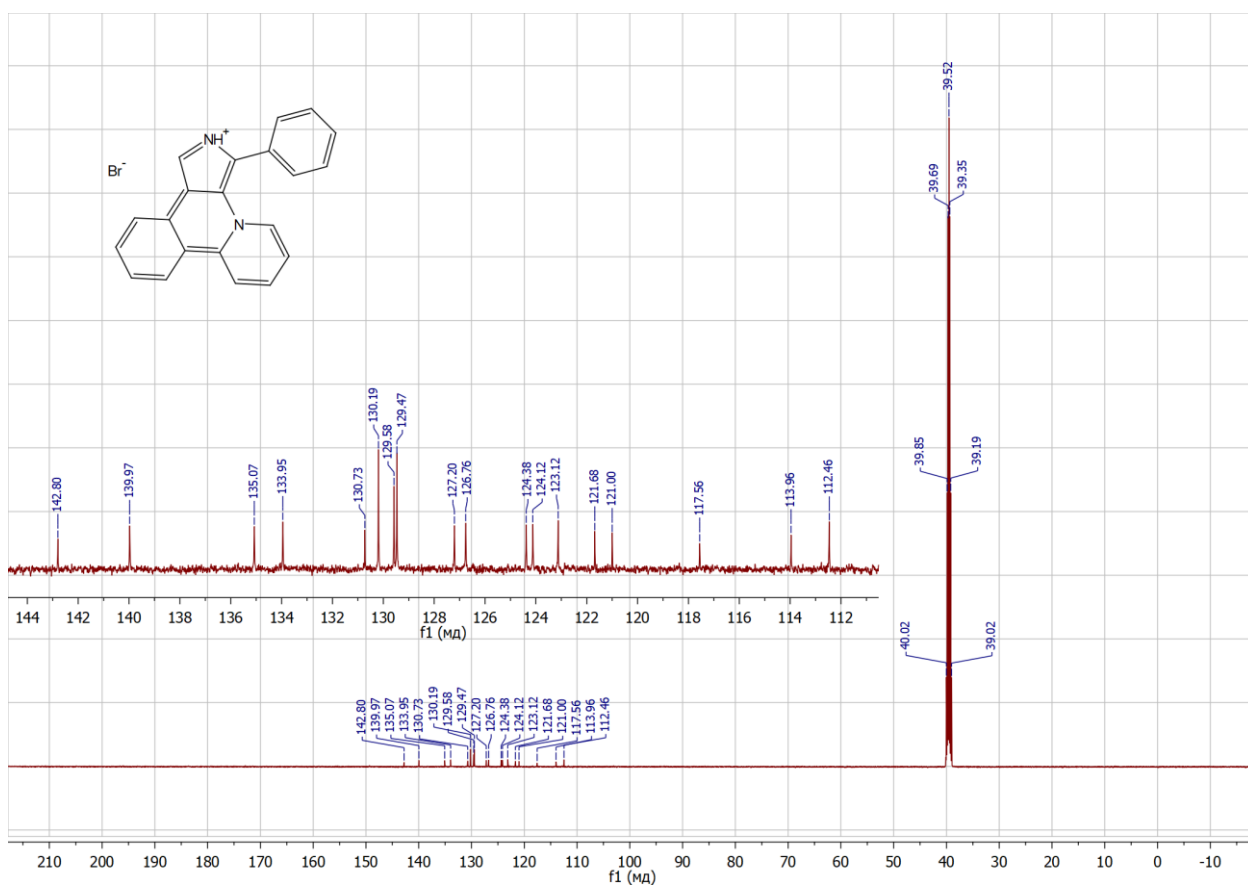

$^{13}\text{C}$  DEPT135 NMR (101 MHz,  $\text{DMSO-}d_6$ ) of 3-phenylpyrido[2,1-*a*]pyrrolo[3,4-*c*]isoquinolin-2-iumbromide (**3a**)

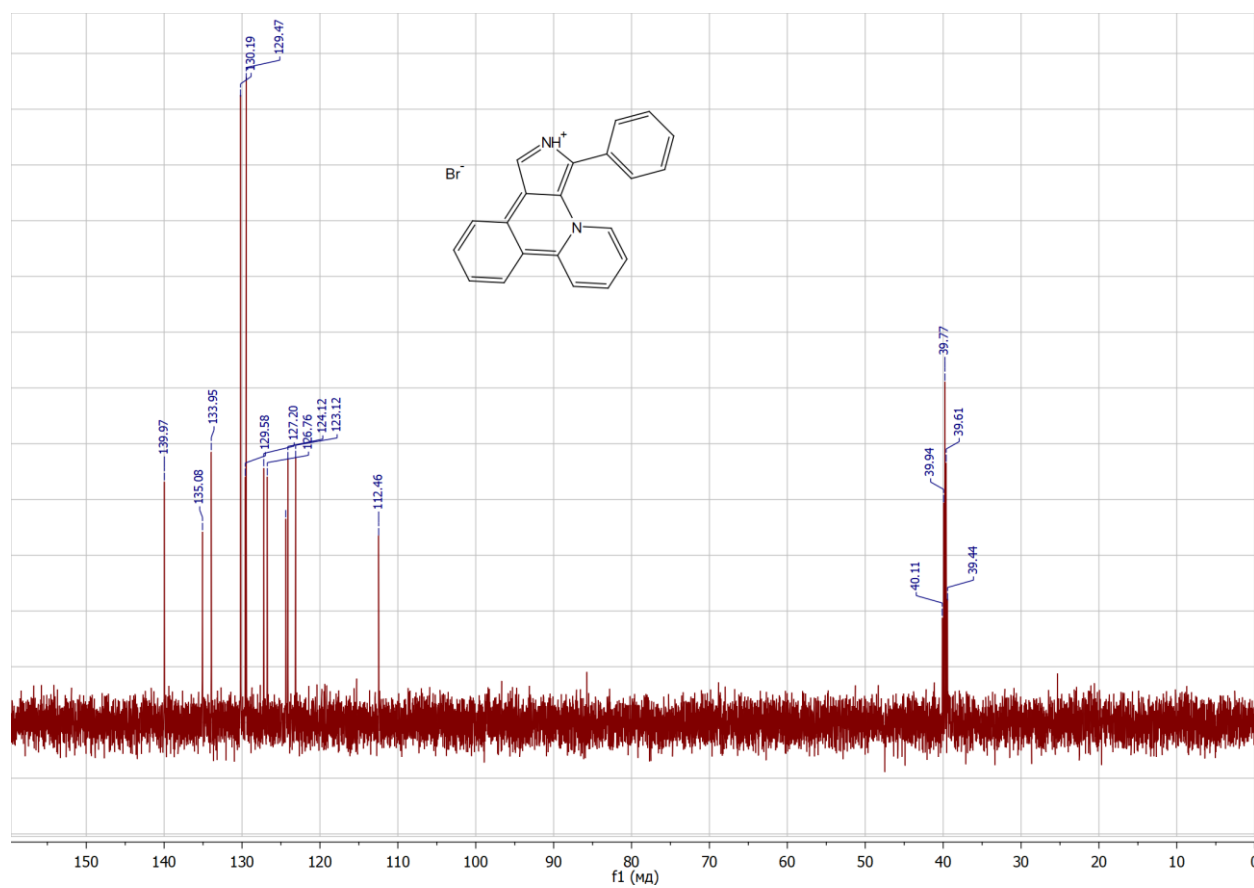

$^1\text{H}$  NMR (400 MHz,  $\text{DMSO}-d_6$ ) of 2-methyl-3-phenyl-2*H*-pyrido[2,1-*a*]pyrrolo[3,4-*c*]isoquinolin-4-ium iodide (N-Me-**3a**)

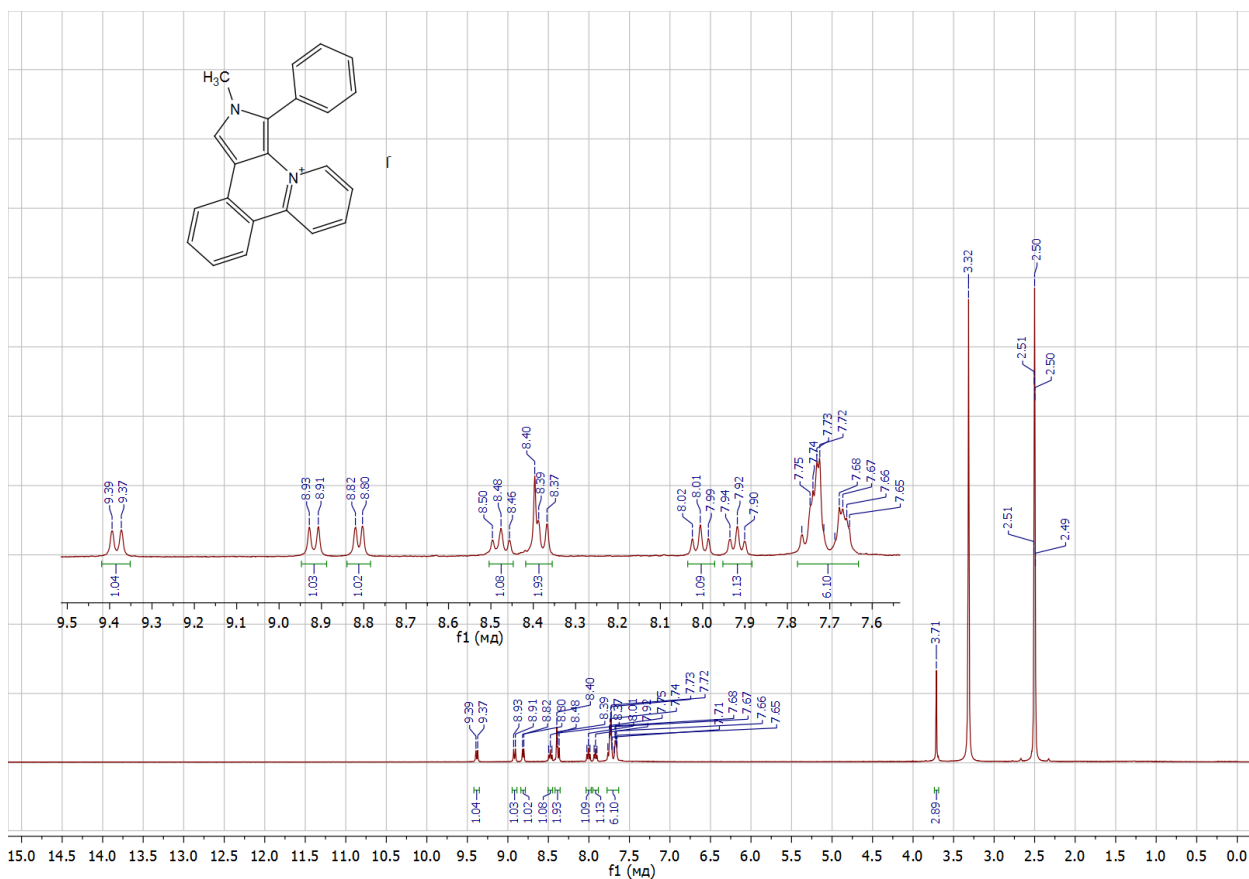

$^{13}\text{C}\{^1\text{H}\}$  NMR (101 MHz,  $\text{DMSO}-d_6$ ) of 2-methyl-3-phenyl-2*H*-pyrido[2,1-*a*]pyrrolo[3,4-*c*]isoquinolin-4-ium iodide (N-Me-**3a**)

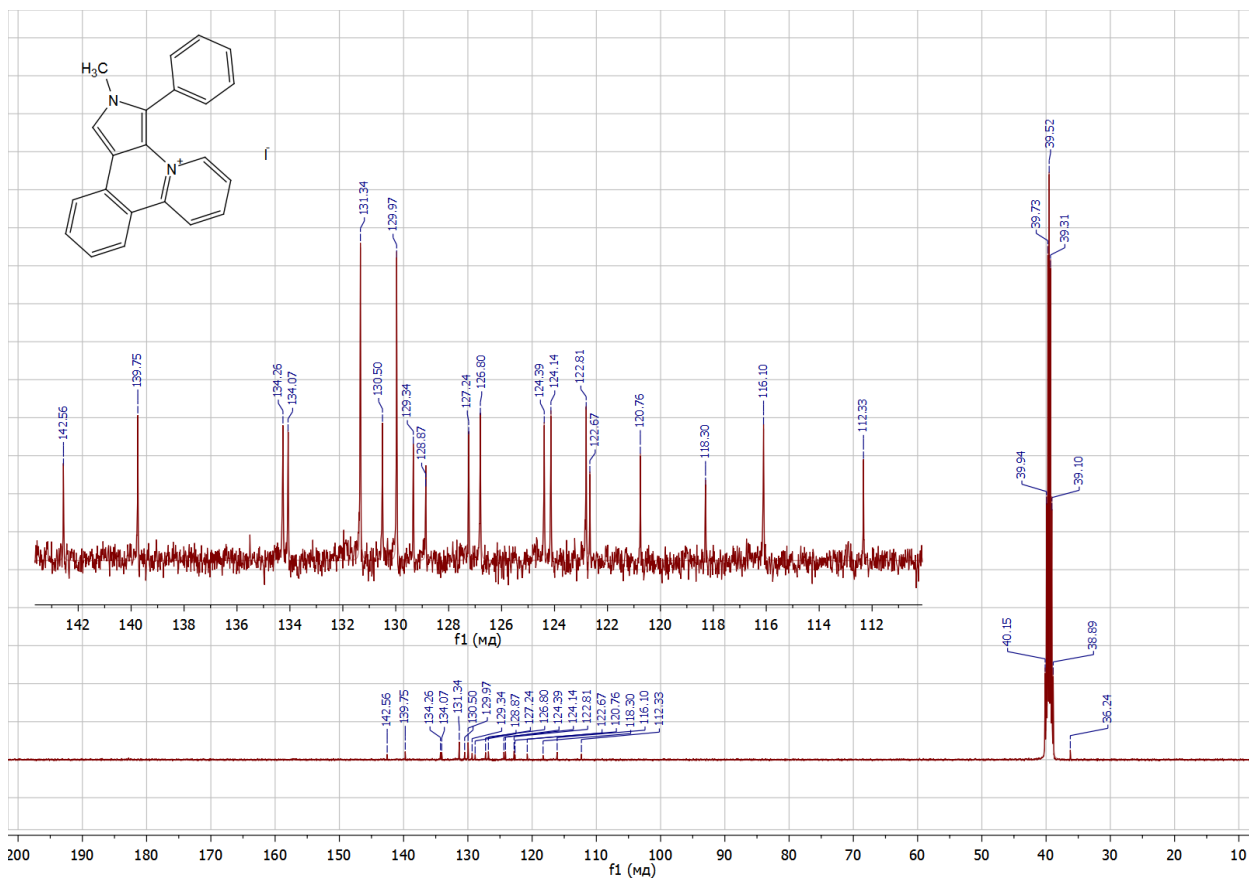

$^{13}\text{C}$  DEPT135 NMR (101 MHz,  $\text{DMSO-}d_6$ ) of 2-methyl-3-phenyl-2*H*-pyrido[2,1-*a*]pyrrolo[3,4-*c*]isoquinolin-4-ium iodide (N-Me-**3a**)

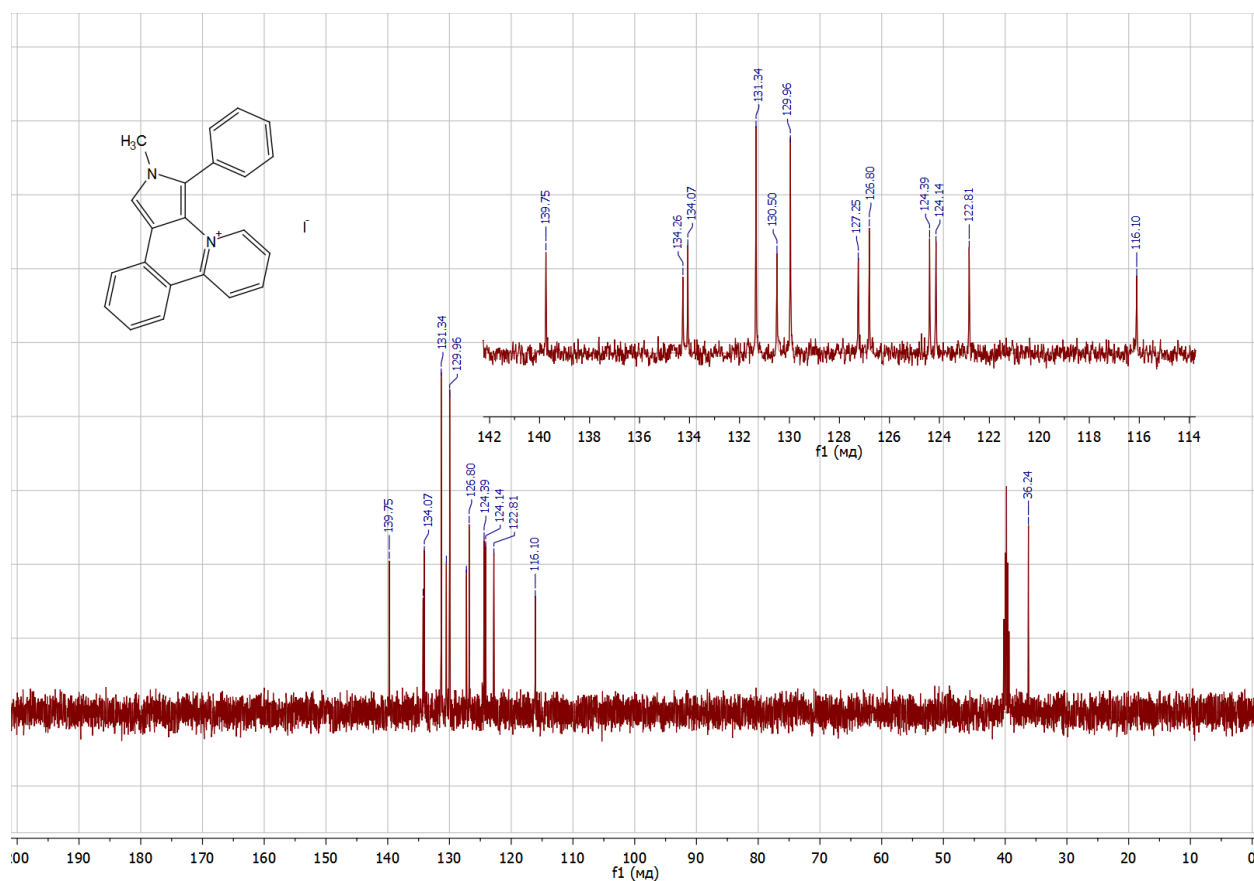

$^1\text{H}$  NMR (400 MHz,  $\text{CDCl}_3$ ) of 2-benzyl-3-phenyl-2*H*-pyrido[2,1-*a*]pyrrolo[3,4-*c*]isoquinolin-4-ium bromide (N-Bn-**3a**)

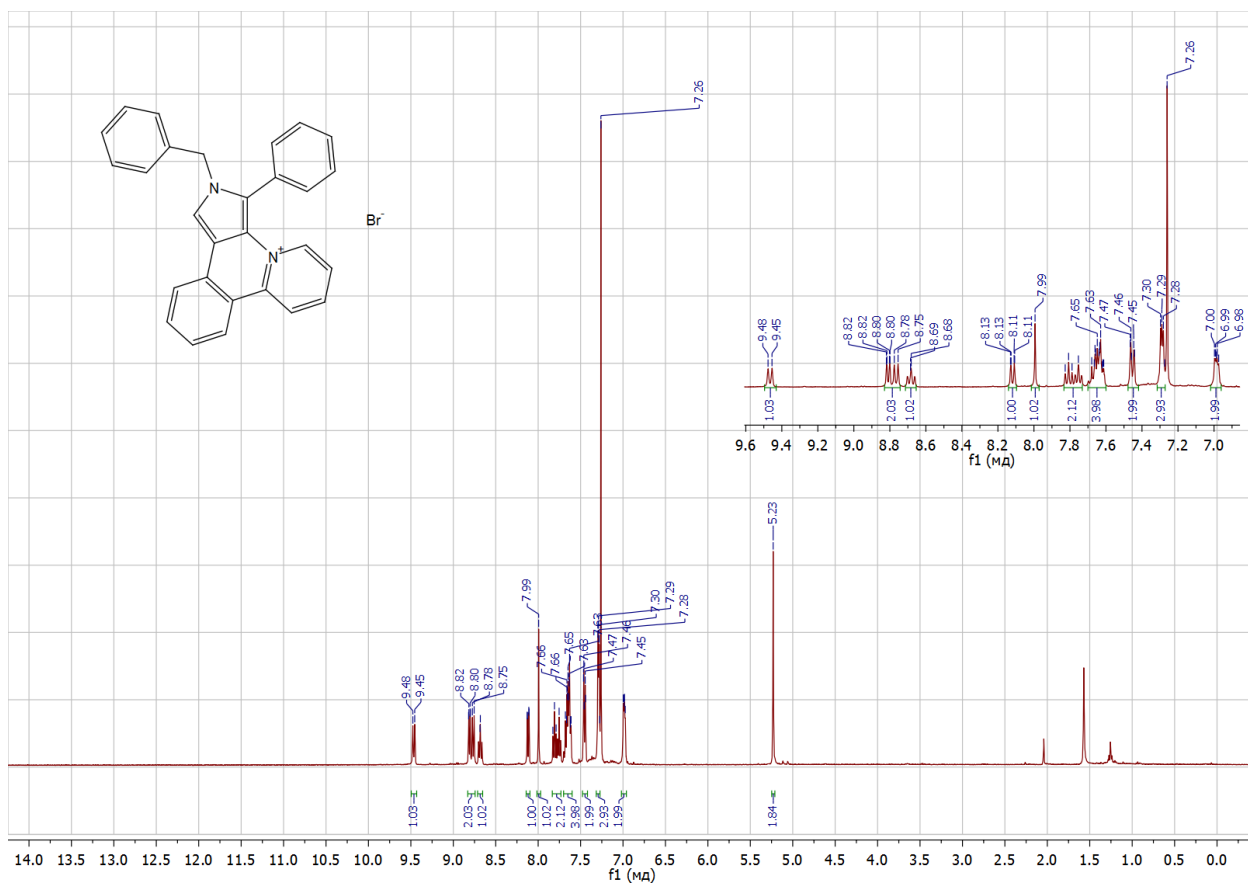

$^{13}\text{C}\{^1\text{H}\}$  NMR (101 MHz,  $\text{CDCl}_3$ ) of 2-benzyl-3-phenyl-2*H*-pyrido[2,1-*a*]pyrrolo[3,4-*c*]isoquinolin-4-ium bromide (N-Bn-**3a**)

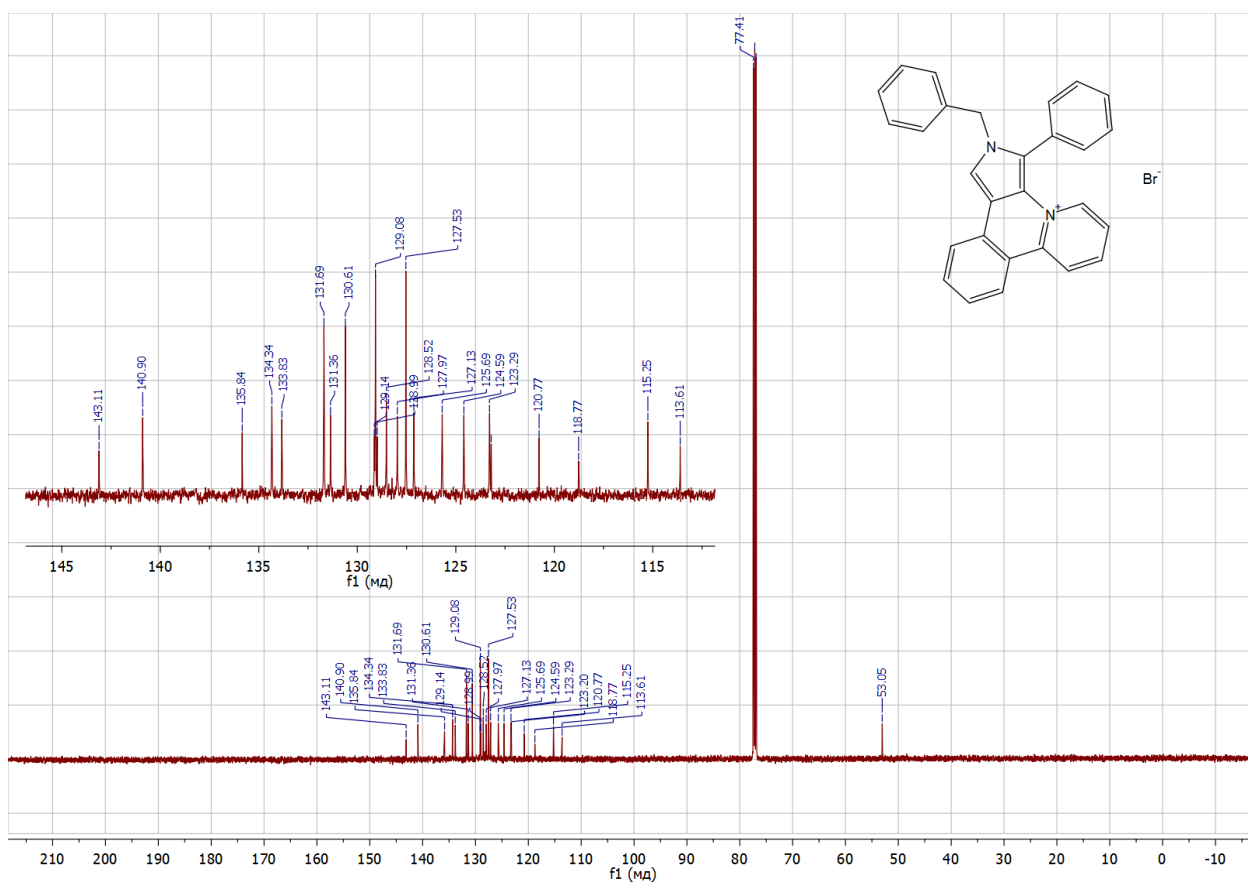

$^{13}\text{C}$  DEPT135 NMR (101 MHz,  $\text{CDCl}_3$ ) of 2-benzyl-3-phenyl-2*H*-pyrido[2,1-*a*]pyrrolo[3,4-*c*]isoquinolin-4-ium bromide (N-Bn-**3a**)

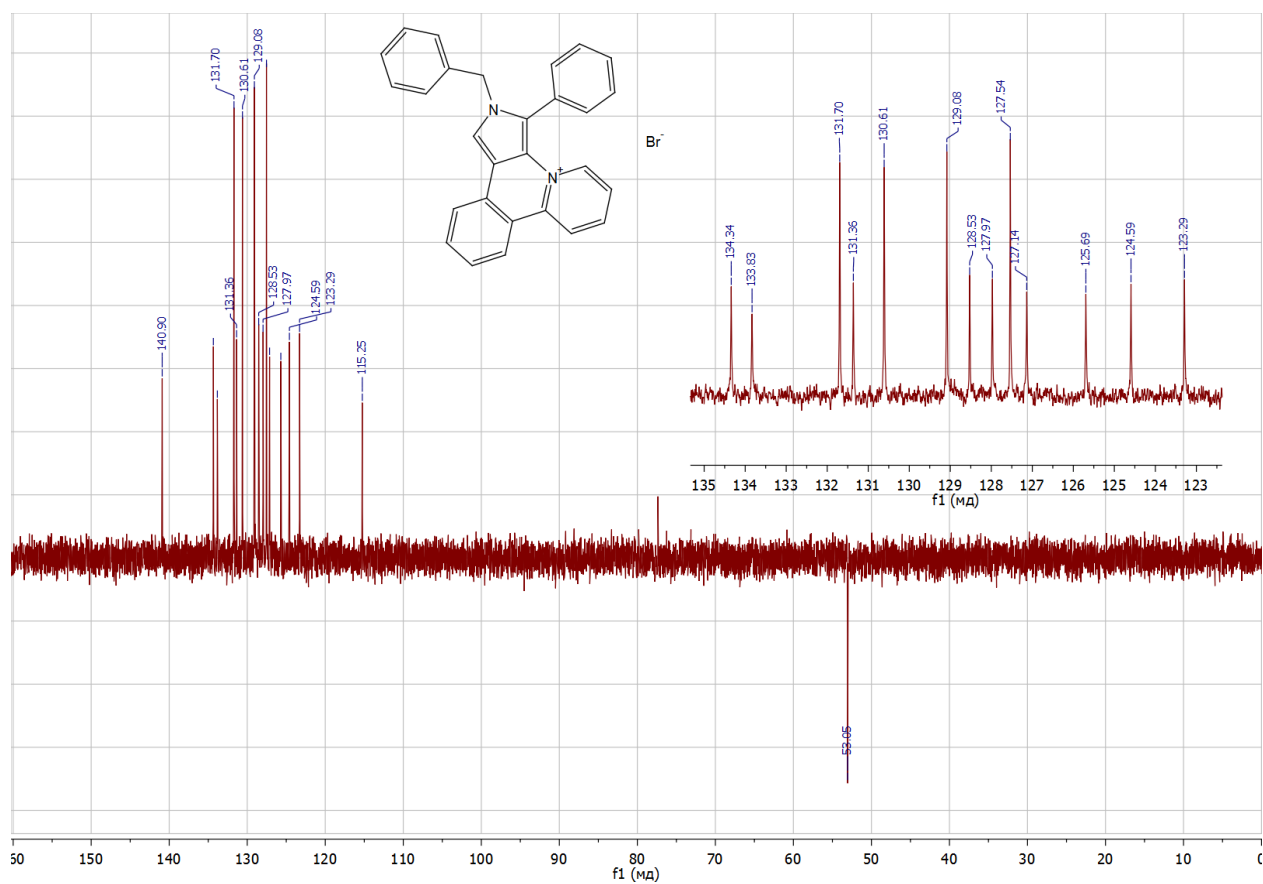



$^1\text{H}$  NMR (400 MHz,  $\text{DMSO-}d_6$ ) of 3-(4-fluorophenyl)pyrido[2,1-*a*]pyrrolo[3,4-*c*]isoquinolin-2-ium bromide (**3b**)

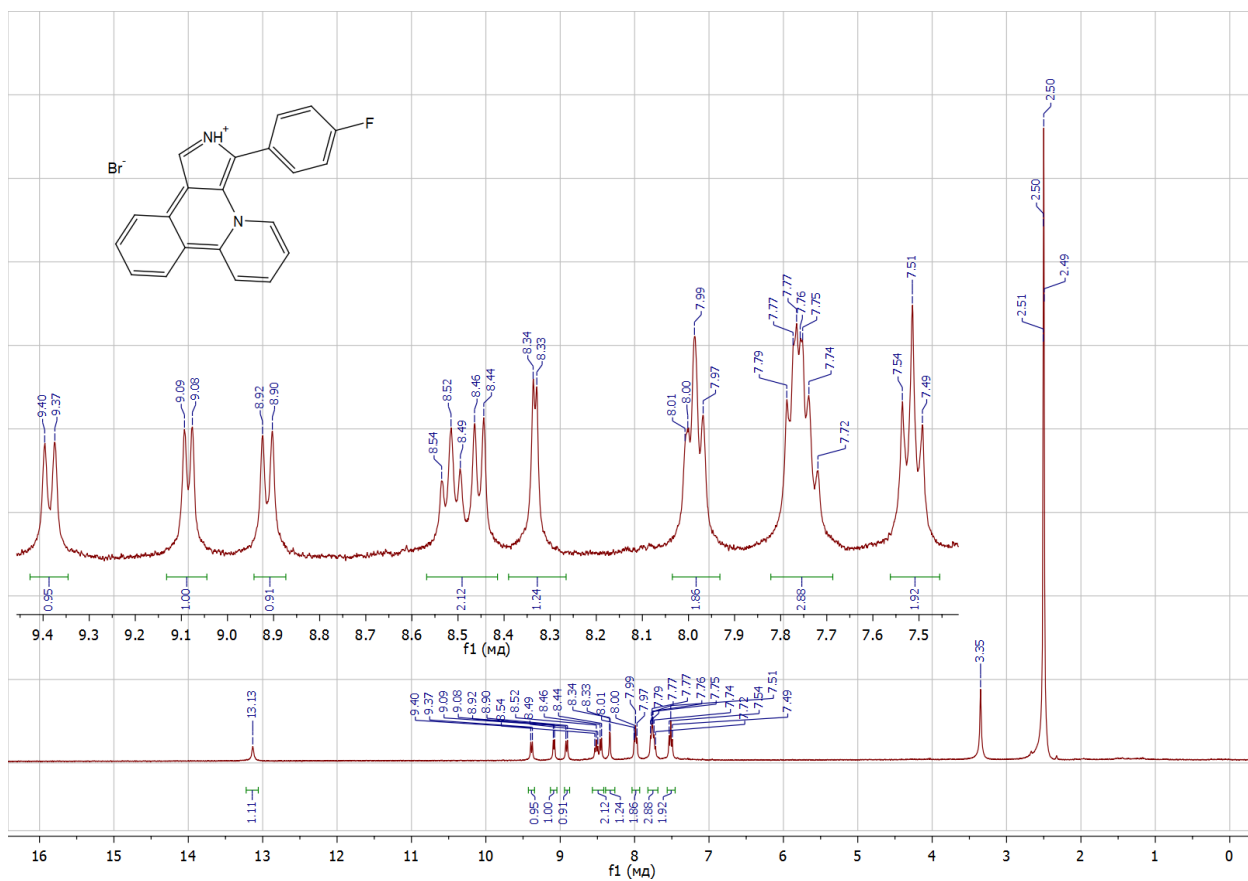

$^{13}\text{C}\{^1\text{H}\}$  NMR (101 MHz,  $\text{DMSO-}d_6$ ) of 3-(4-fluorophenyl)pyrido[2,1-*a*]pyrrolo[3,4-*c*]isoquinolin-2-ium bromide (**3b**)

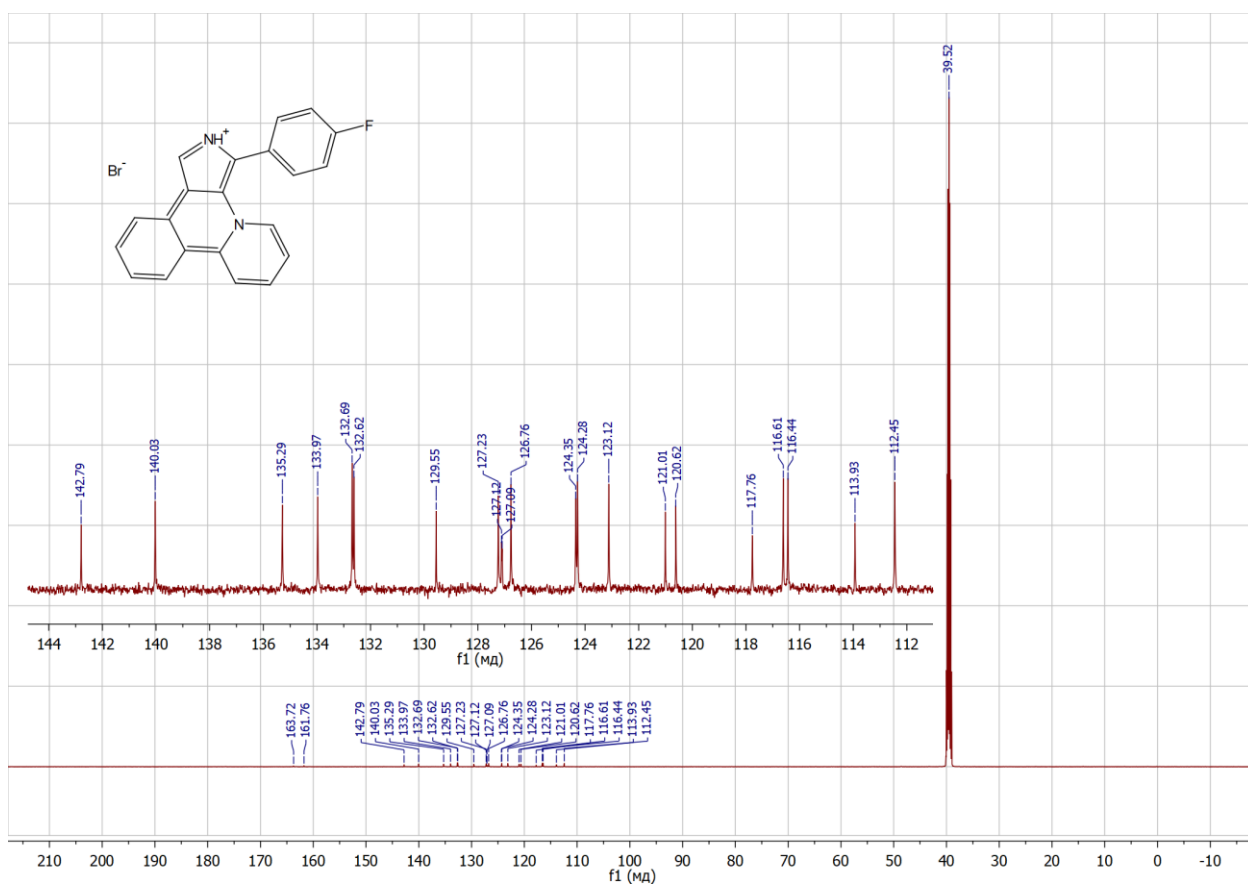

$^{13}\text{C}$  DEPT135 NMR (101 MHz,  $\text{DMSO}-d_6$ ) of 3-(4-fluorophenyl)pyrido[2,1-*a*]pyrrolo[3,4-*c*]isoquinolin-2-ium bromide (**3b**)

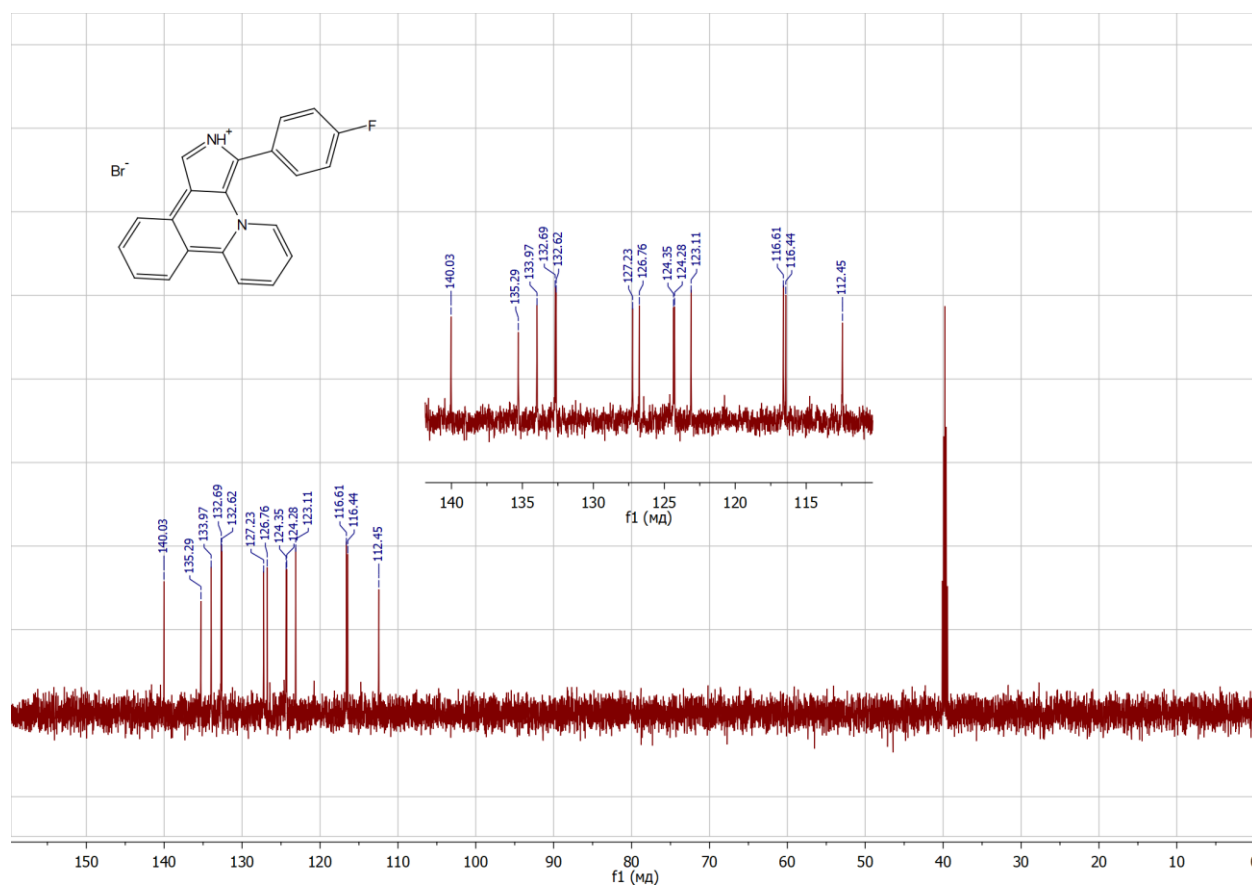

$^1\text{H}$  NMR (400 MHz,  $\text{DMSO}-d_6$ ) of 3-(4-chlorophenyl)pyrido[2,1-*a*]pyrrolo[3,4-*c*]isoquinolin-2-ium bromide (**3c**)

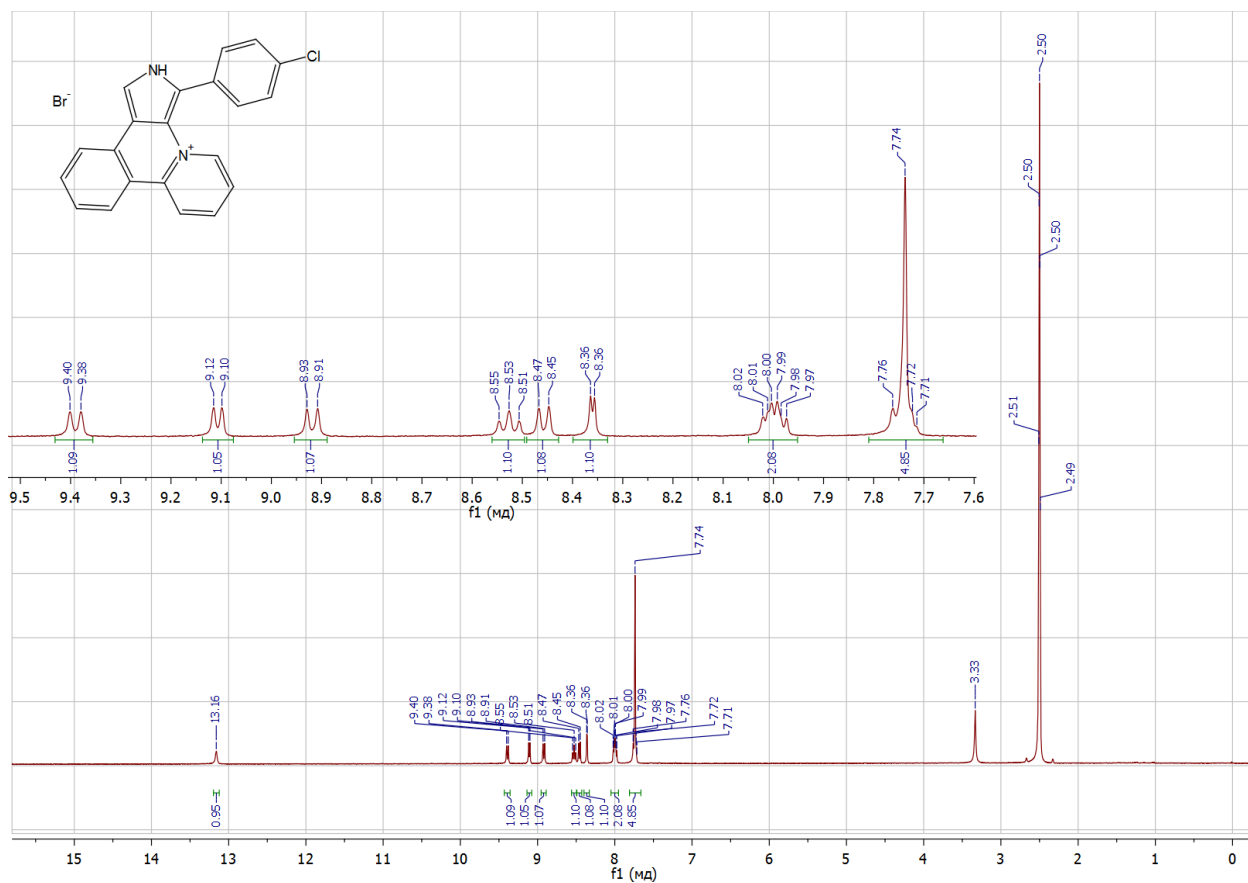

$^{13}\text{C}\{^1\text{H}\}$  NMR (101 MHz,  $\text{DMSO}-d_6$ ) of 3-(4-chlorophenyl)pyrido[2,1-*a*]pyrrolo[3,4-*c*]isoquinolin-2-ium bromide (**3c**)

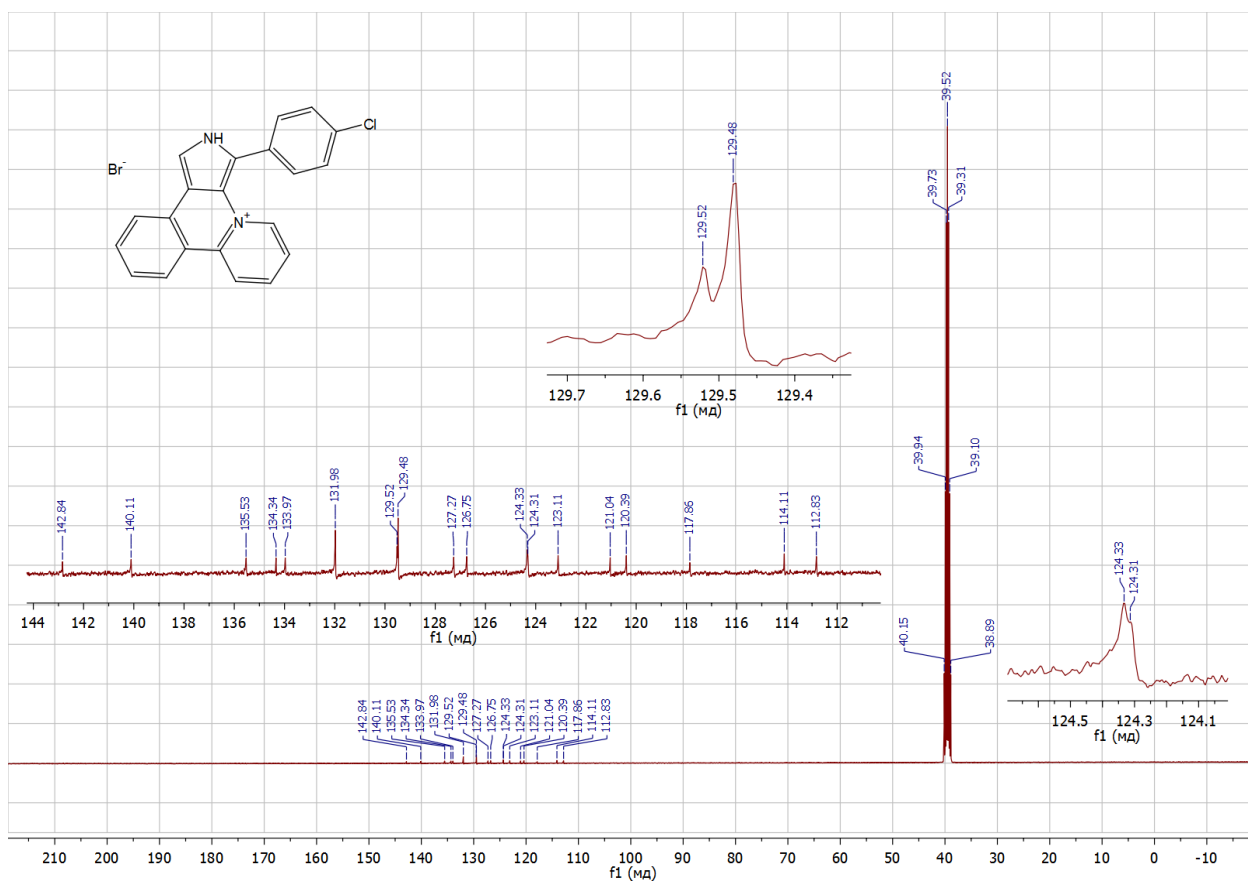

$^{13}\text{C}$  DEPT135 NMR (101 MHz,  $\text{DMSO-}d_6$ ) of 3-(4-chlorophenyl)pyrido[2,1-*a*]pyrrolo[3,4-*c*]isoquinolin-2-ium bromide (**3e**)

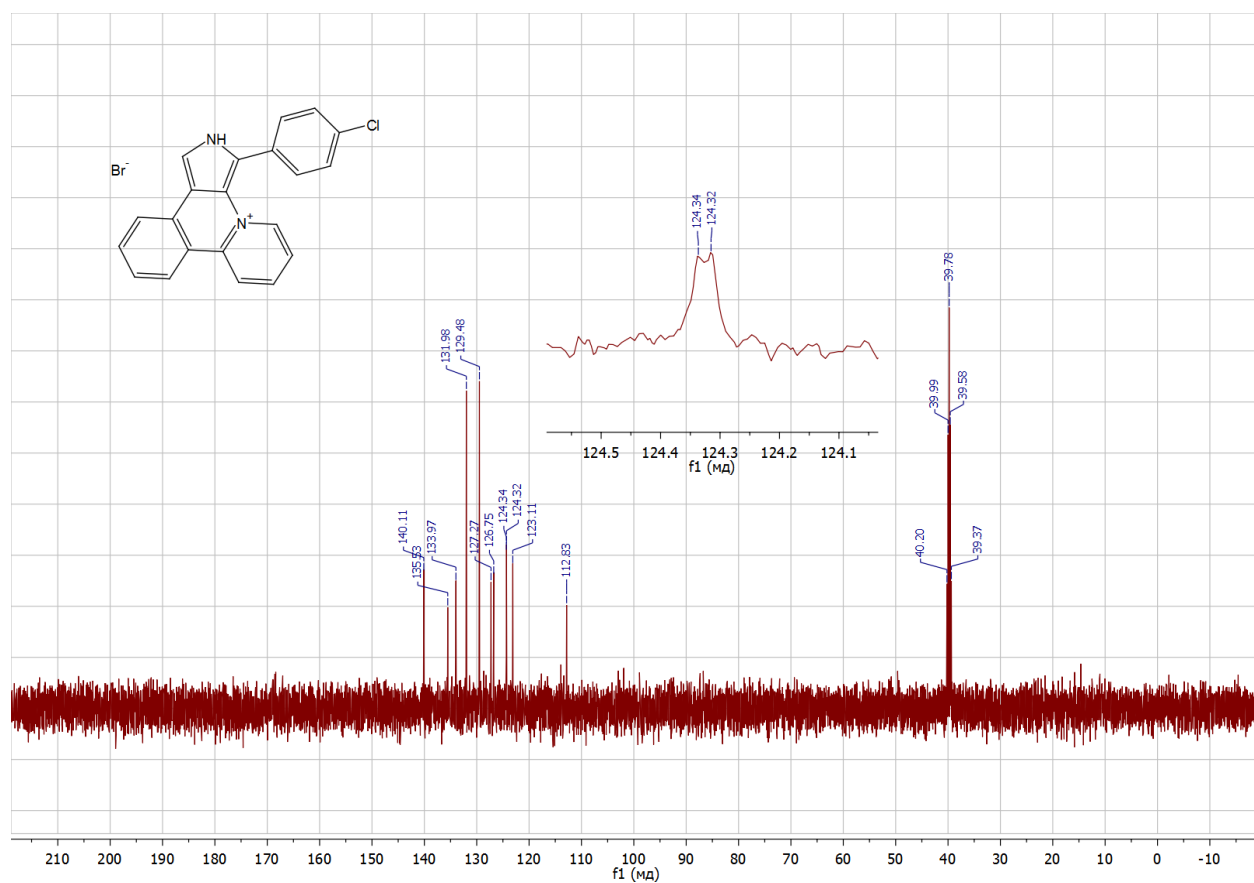

Chemical structure: 1-methyl-2-(1H-indolizin-3-yl)benzene bromide

<sup>1</sup>H NMR spectrum (ppm):

- 13.07 (s, 1H, integration 0.96)
- 9.38 (d, 2H, integration 1.03)
- 9.17 (d, 2H, integration 1.00)
- 8.90 (d, 2H, integration 1.02)
- 8.52 (d, 2H, integration 0.96)
- 8.48 (d, 2H, integration 1.01)
- 8.45 (d, 2H, integration 1.02)
- 8.30 (d, 2H, integration 0.96)
- 8.29 (d, 2H, integration 1.00)
- 8.01 (d, 2H, integration 2.03)
- 7.99 (d, 2H, integration 2.03)
- 7.96 (d, 2H, integration 2.03)
- 7.73 (d, 2H, integration 1.03)
- 7.71 (d, 2H, integration 2.03)
- 7.69 (d, 2H, integration 2.03)
- 7.59 (d, 2H, integration 2.50)
- 7.46 (d, 2H, integration 2.50)
- 2.50 (s, 3H, integration 2.90)
- 2.47 (s, 3H, integration 2.49)

[illegible]

$^{13}\text{C}$  DEPT135 NMR (101 MHz,  $\text{DMSO-}d_6$ ) of 3-(4-methylphenyl)pyrido[2,1-*a*]pyrrolo[3,4-*c*]isoquinolin-2-ium bromide (**3e**)

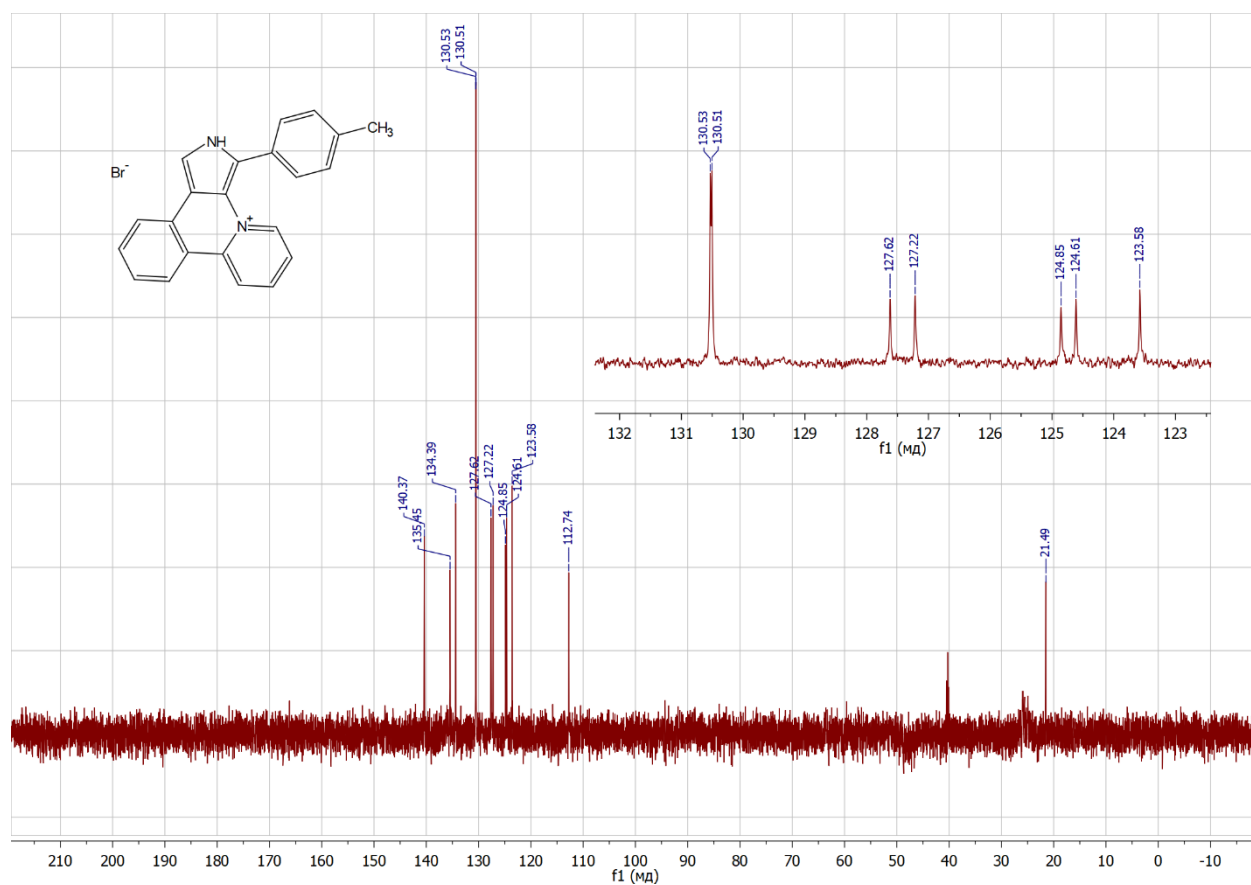

$^1\text{H}$  NMR (400 MHz,  $\text{DMSO}-d_6$ ) of 3-(4-methoxyphenyl)pyrido[2,1-*a*]pyrrolo[3,4-*c*]isoquinolin-2-ium bromide (**3f**)

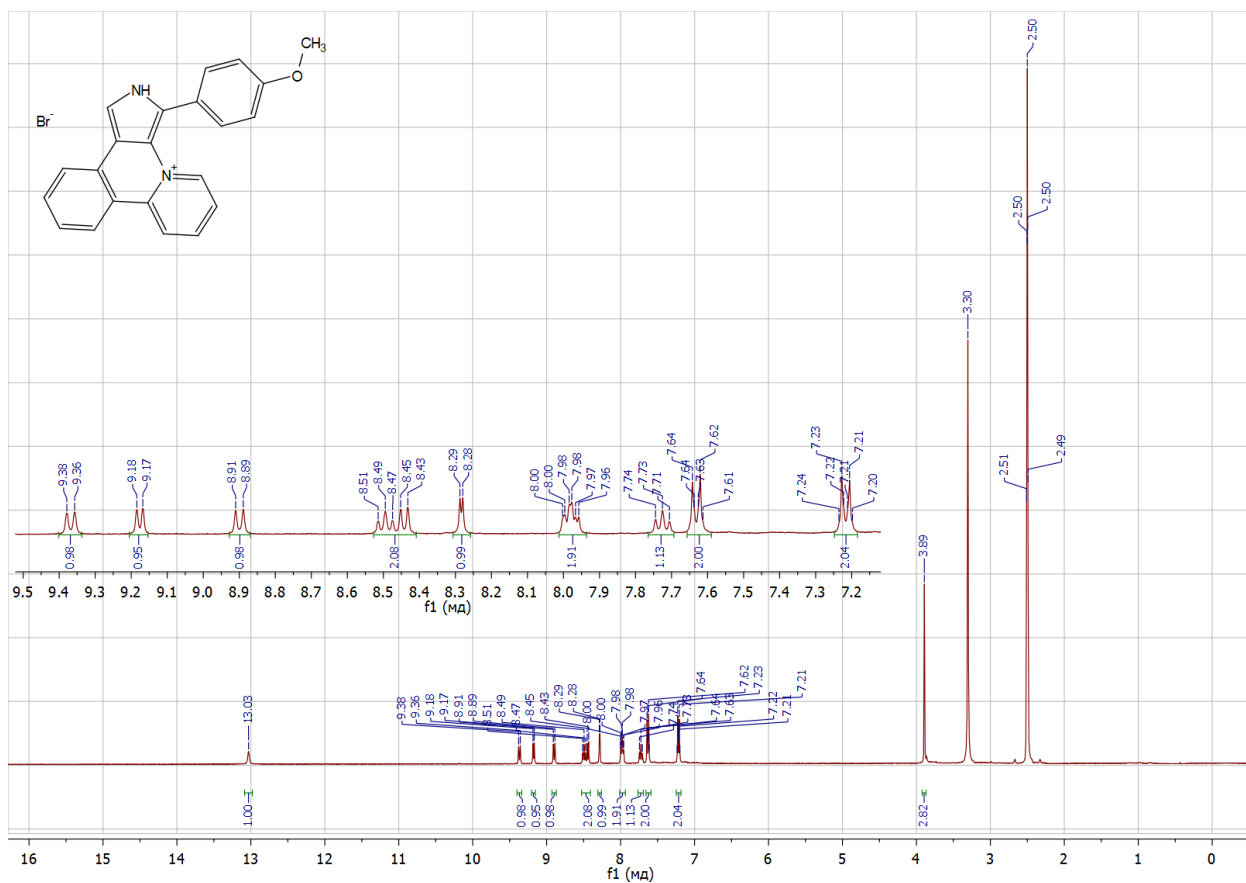

$^{13}\text{C}\{^1\text{H}\}$  NMR (101 MHz,  $\text{DMSO}-d_6$ ) of 3-(4-methoxyphenyl)pyrido[2,1-*a*]pyrrolo[3,4-*c*]isoquinolin-2-ium bromide (**3f**)

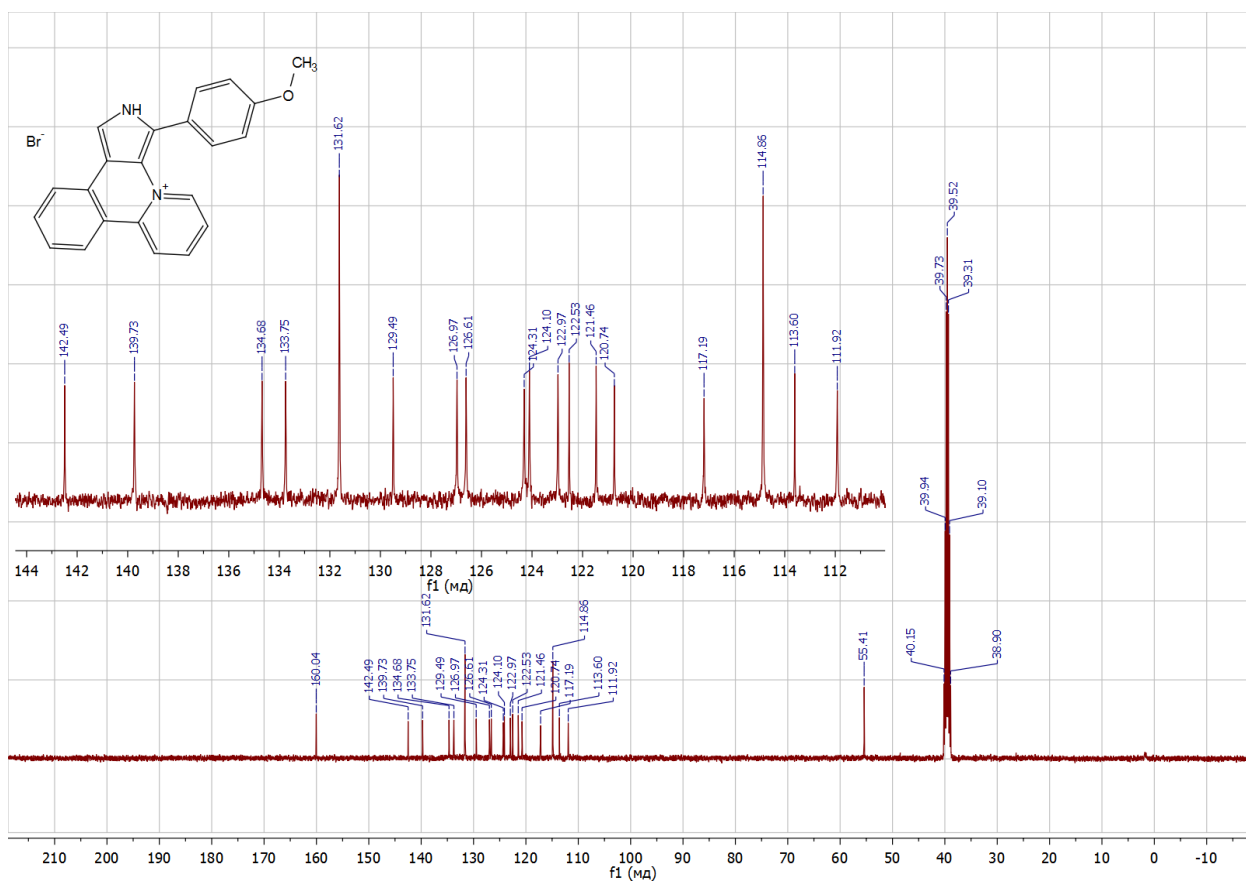

$^{13}\text{C}$  DEPT135 NMR (101 MHz,  $\text{DMSO-}d_6$ ) of 3-(4-methoxyphenyl)pyrido[2,1-*a*]pyrrolo[3,4-*c*]isoquinolin-2-ium bromide (**3f**)

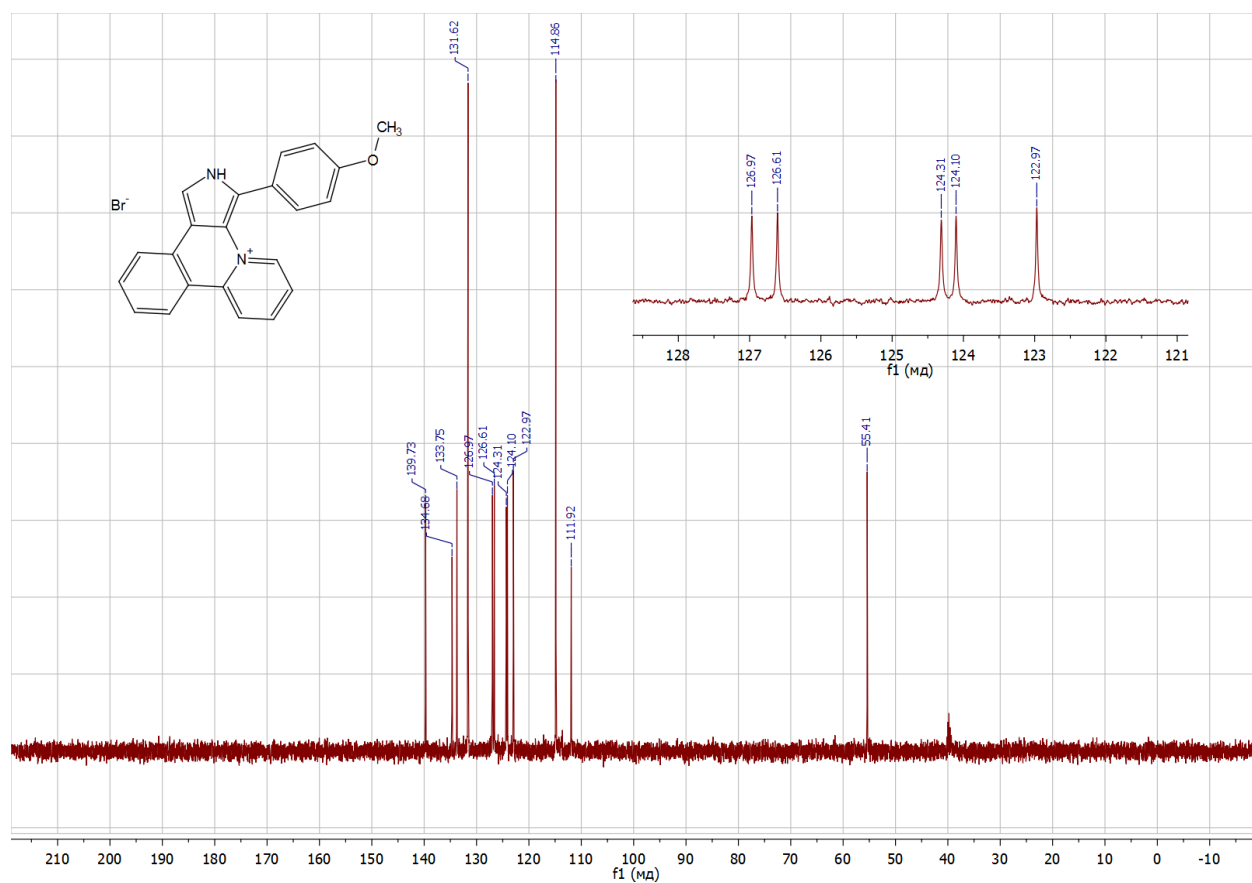



$^1\text{H}$  NMR (400 MHz,  $\text{DMSO-}d_6$ ) of 3-(2-methoxyphenyl)pyrido[2,1-*a*]pyrrolo[3,4-*c*]isoquinolin-2-ium bromide (**3g**)

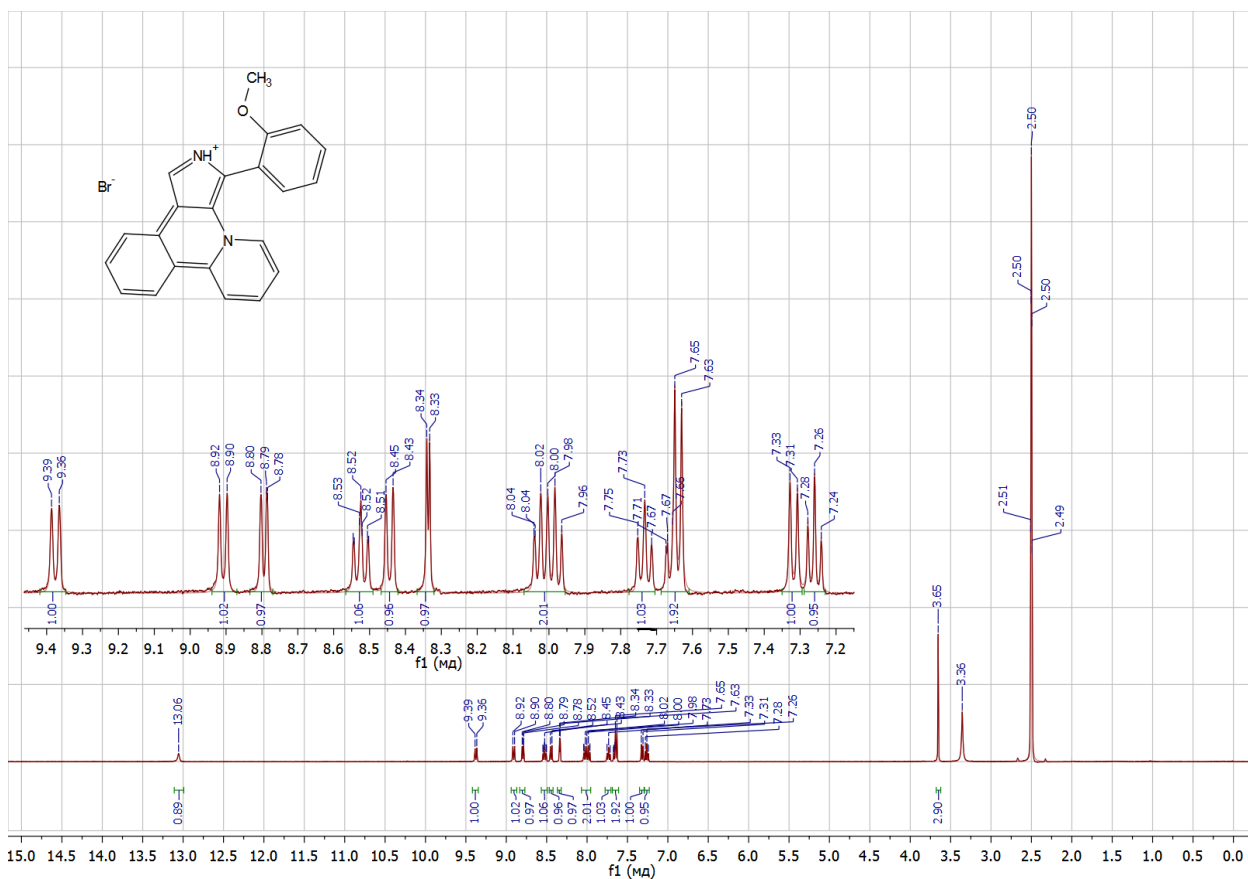

$^{13}\text{C}\{^1\text{H}\}$  NMR (101 MHz,  $\text{DMSO-}d_6$ ) of 3-(2-methoxyphenyl)pyrido[2,1-*a*]pyrrolo[3,4-*c*]isoquinolin-2-ium bromide (**3g**)

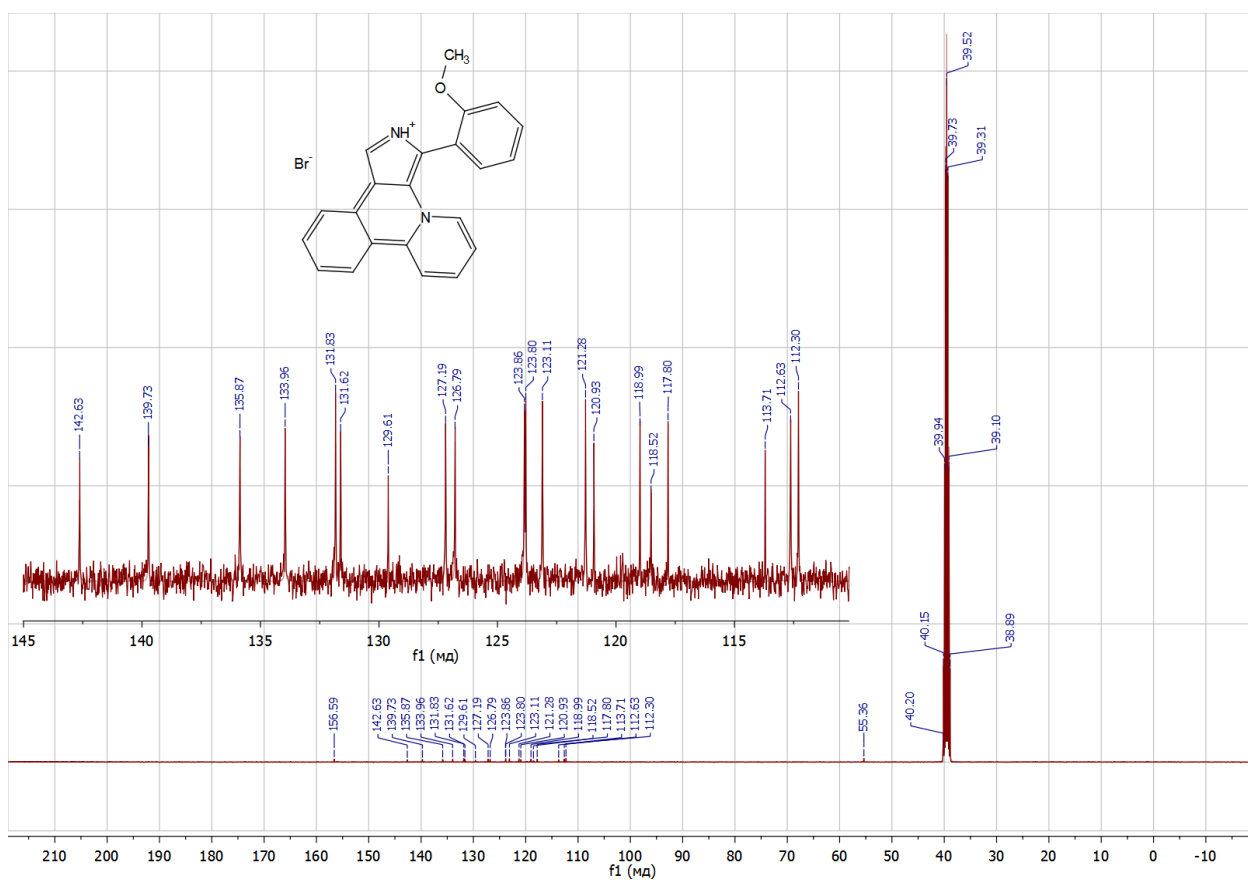

$^{13}\text{C}$  DEPT135 NMR (101 MHz,  $\text{DMSO}-d_6$ ) of 3-(2-methoxyphenyl)pyrido[2,1-*a*]pyrrolo[3,4-*c*]isoquinolin-2-ium bromide (**3g**)

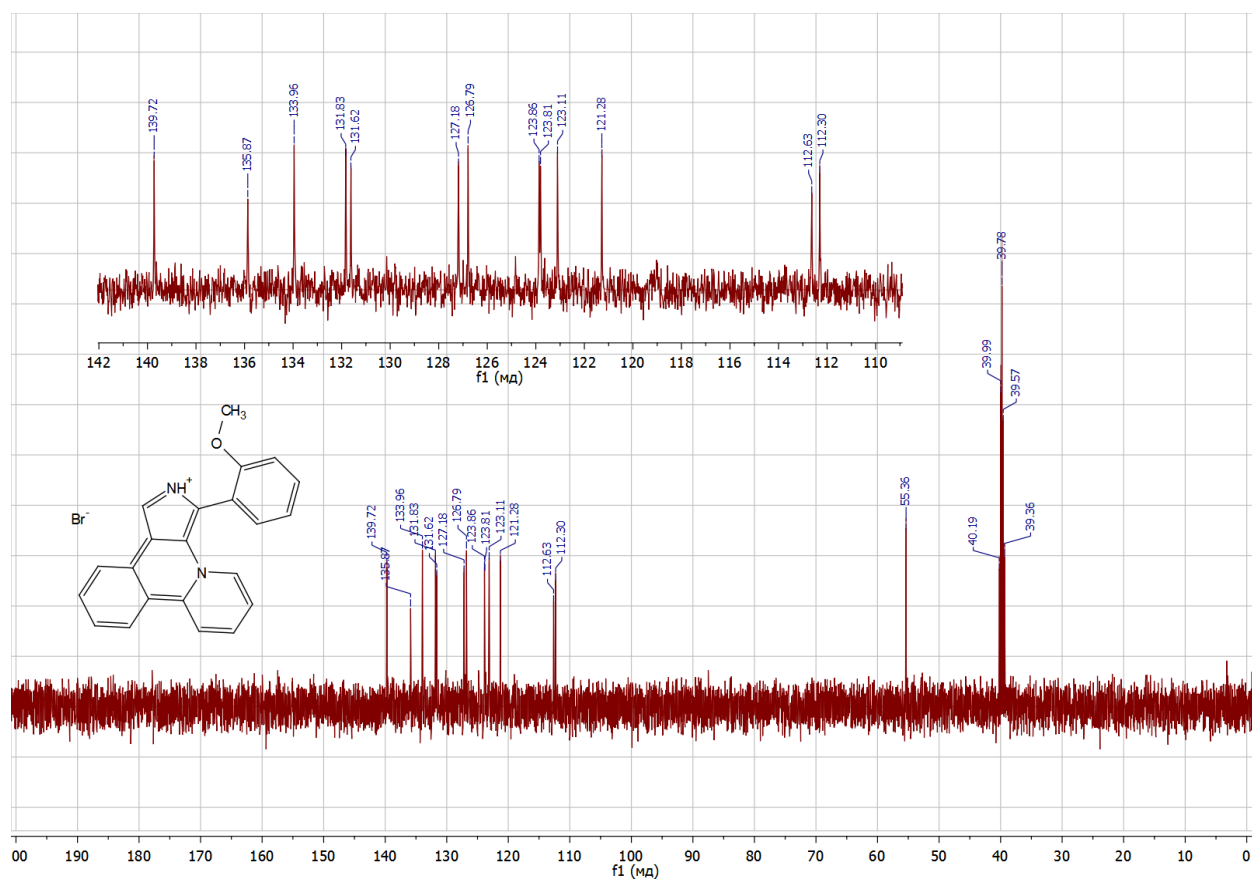

$^1\text{H}$  NMR (400 MHz,  $\text{DMSO-}d_6$ ) of 3-(3-methoxyphenyl)pyrido[2,1-*a*]pyrrolo[3,4-*c*]isoquinolin-2-ium bromide (**3h**)

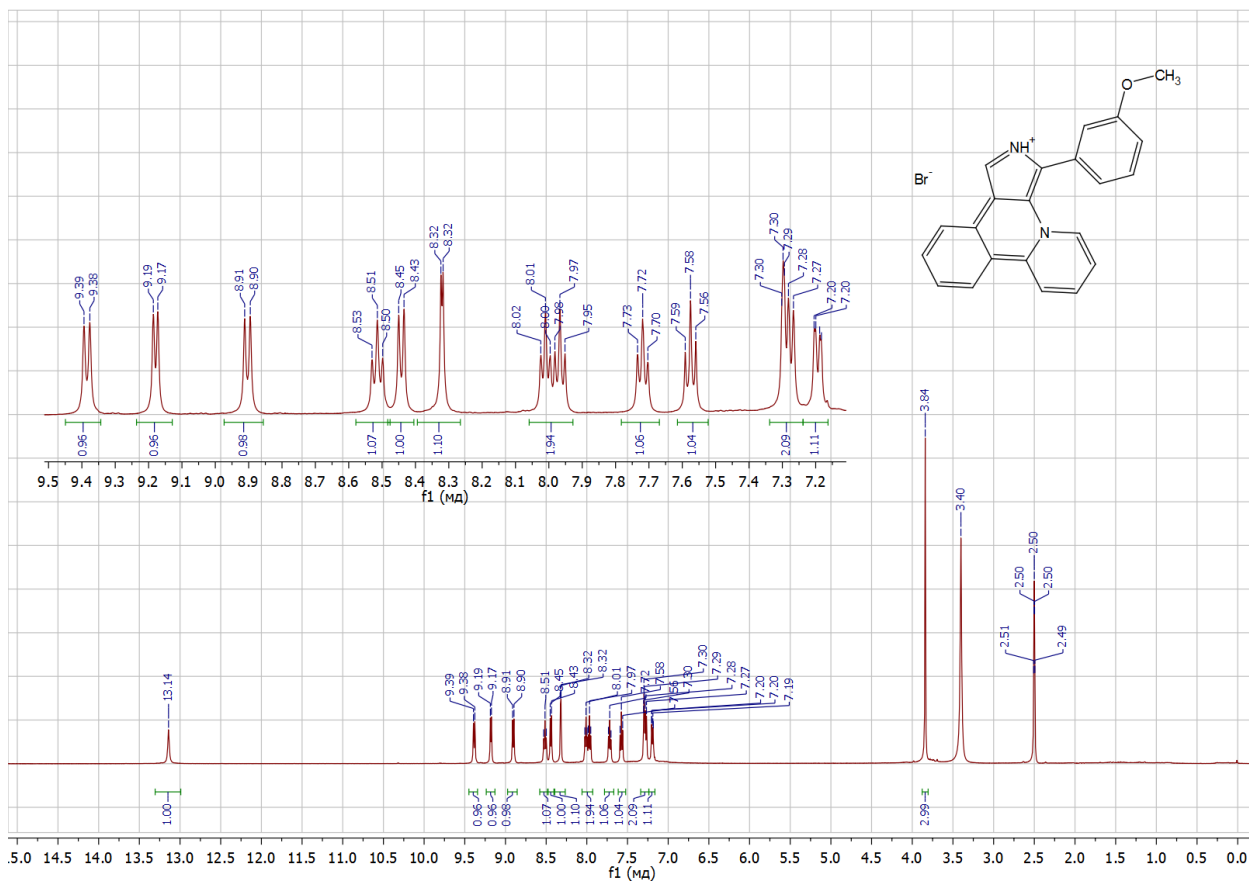

$^{13}\text{C}\{^1\text{H}\}$  NMR (101 MHz,  $\text{DMSO-}d_6$ ) of 3-(3-methoxyphenyl)pyrido[2,1-*a*]pyrrolo[3,4-*c*]isoquinolin-2-ium bromide (**3h**)

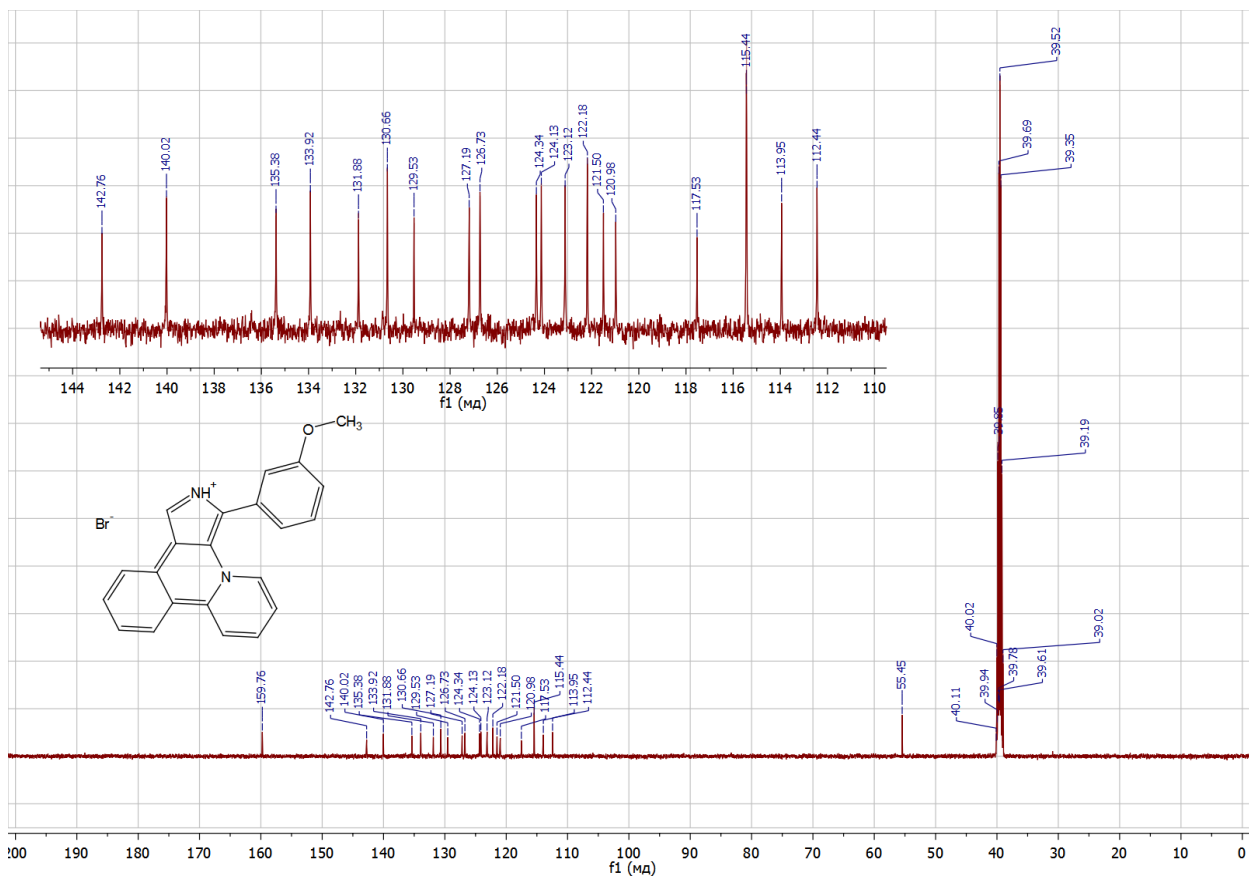

$^{13}\text{C}$  DEPT135 NMR (101 MHz,  $\text{DMSO-}d_6$ ) of 3-(3-methoxyphenyl)pyrido[2,1-*a*]pyrrolo[3,4-*c*]isoquinolin-2-ium bromide (**3h**)

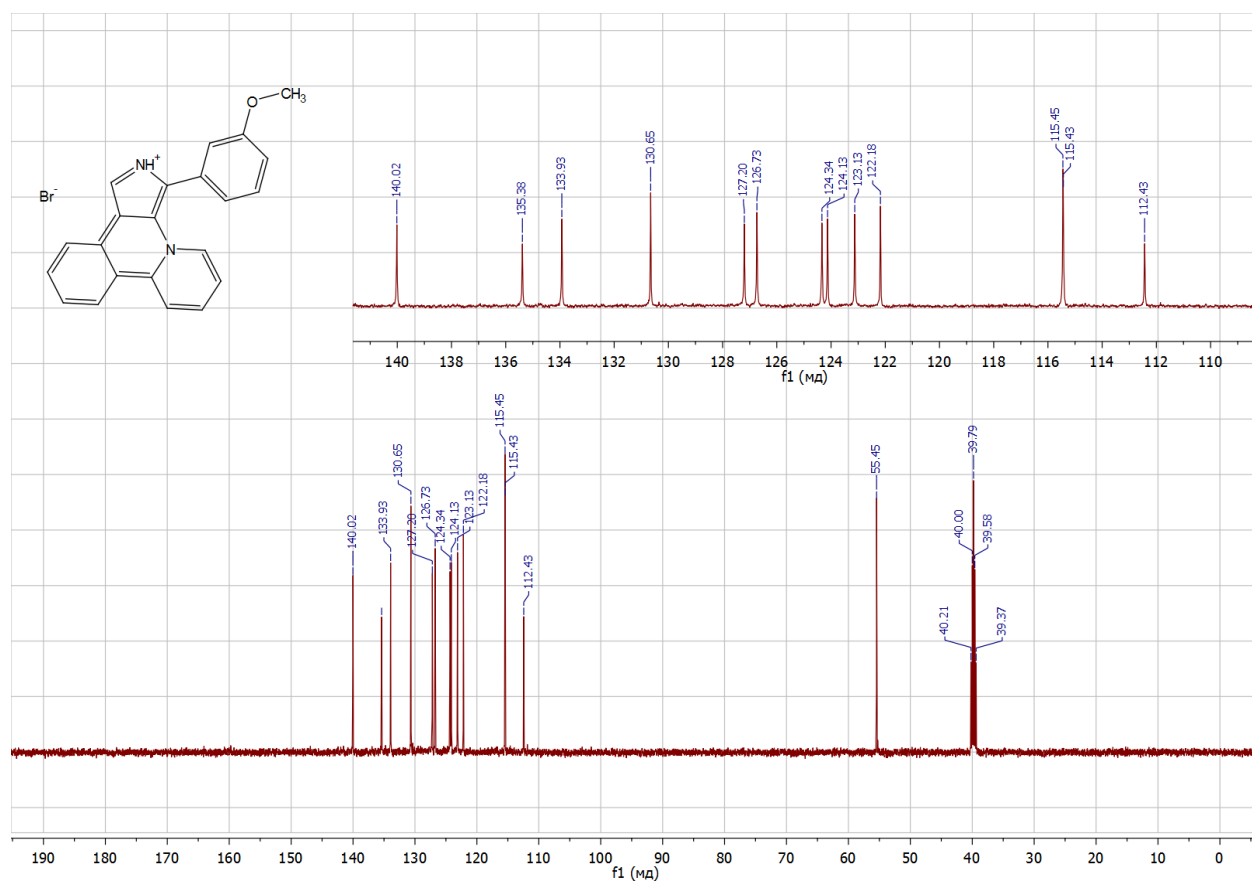

$^1\text{H}$  NMR (400 MHz,  $\text{DMSO}-d_6$ ) of 3-(2,4-dimethoxyphenyl)pyrido[2,1-*a*]pyrrolo[3,4-*c*]isoquinolin-2-ium bromide (**3i**)

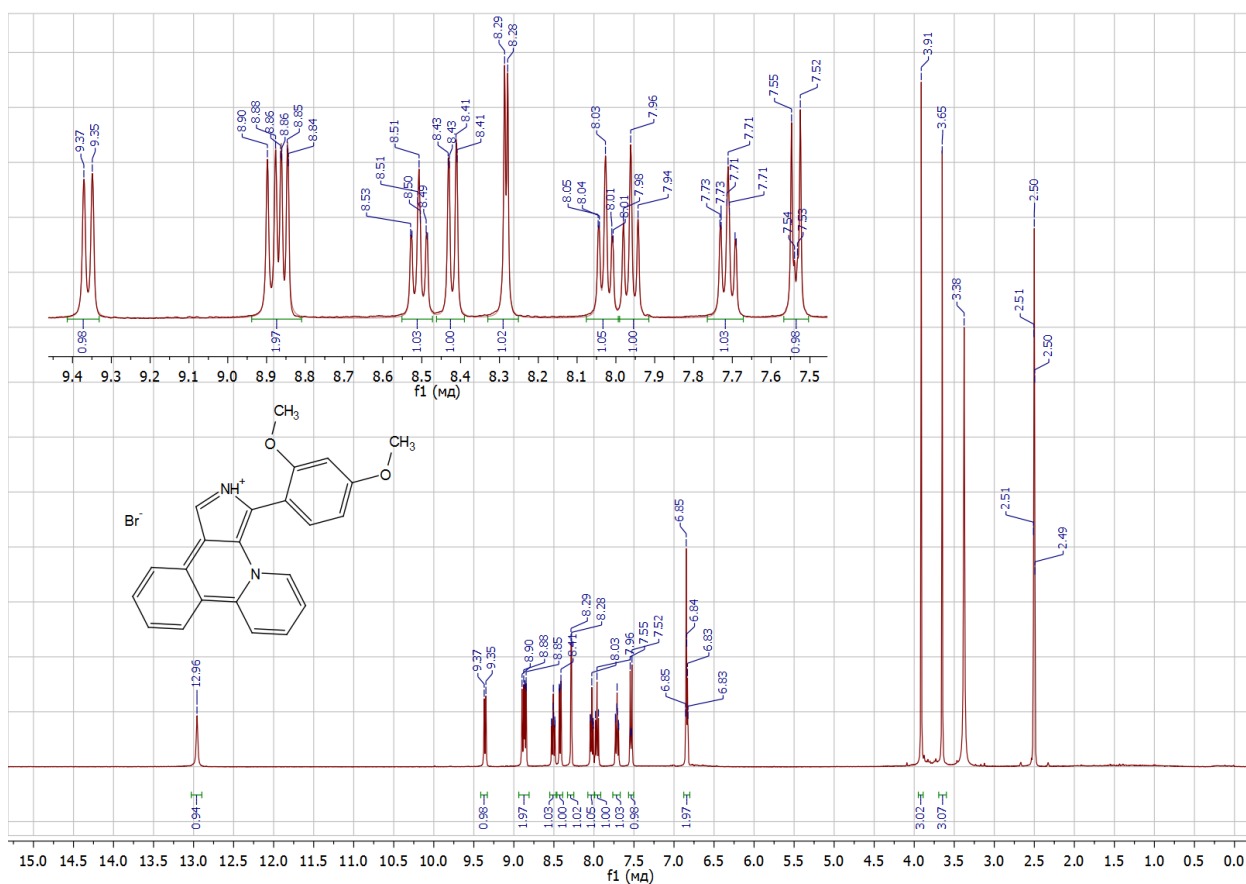

$^{13}\text{C}\{^1\text{H}\}$  NMR (101 MHz,  $\text{DMSO}-d_6$ ) of 3-(2,4-dimethoxyphenyl)pyrido[2,1-*a*]pyrrolo[3,4-*c*]isoquinolin-2-ium bromide (**3i**)

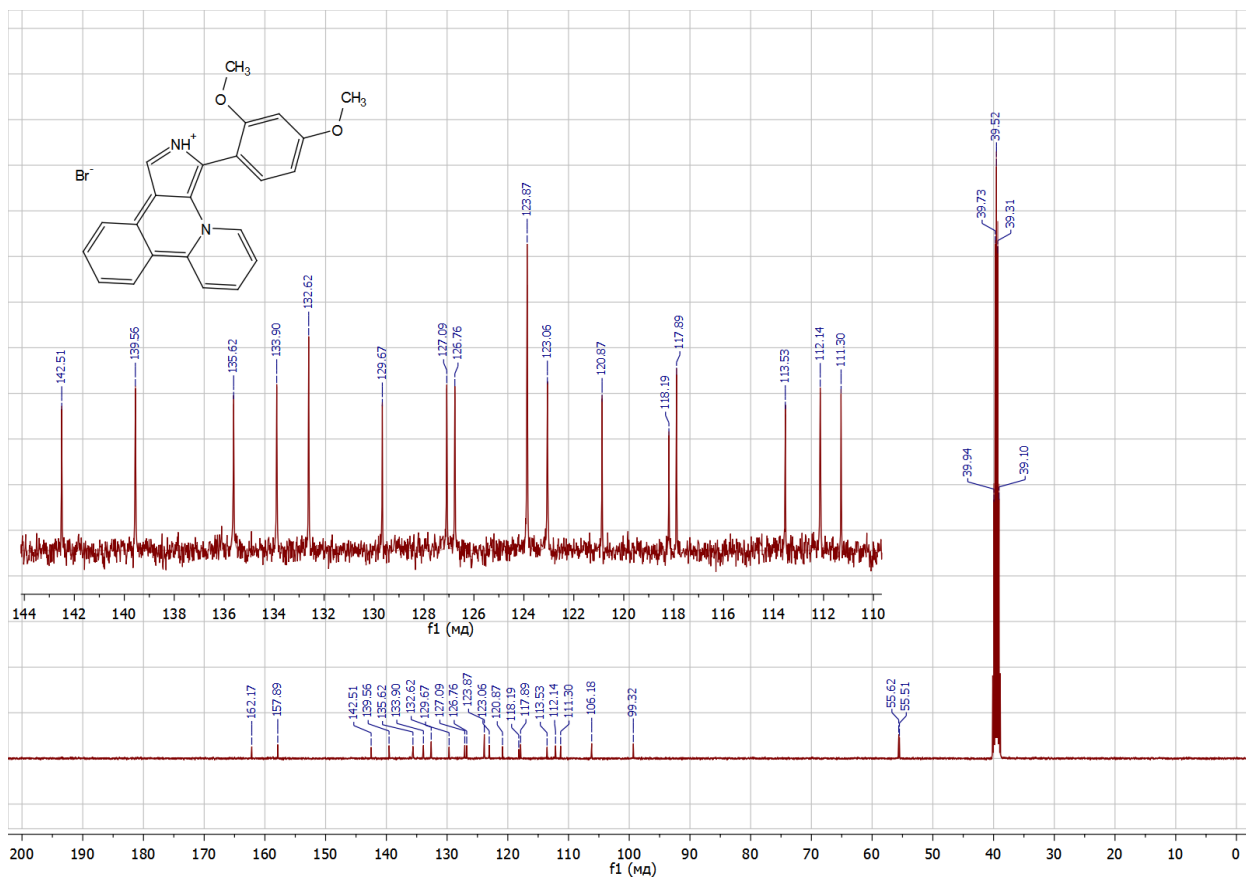

$^{13}\text{C}$  DEPT135 NMR (101 MHz,  $\text{DMSO-}d_6$ ) of 3-(2,4-dimethoxyphenyl)pyrido[2,1-*a*]pyrrolo[3,4-*c*]isoquinolin-2-ium bromide (**3i**)

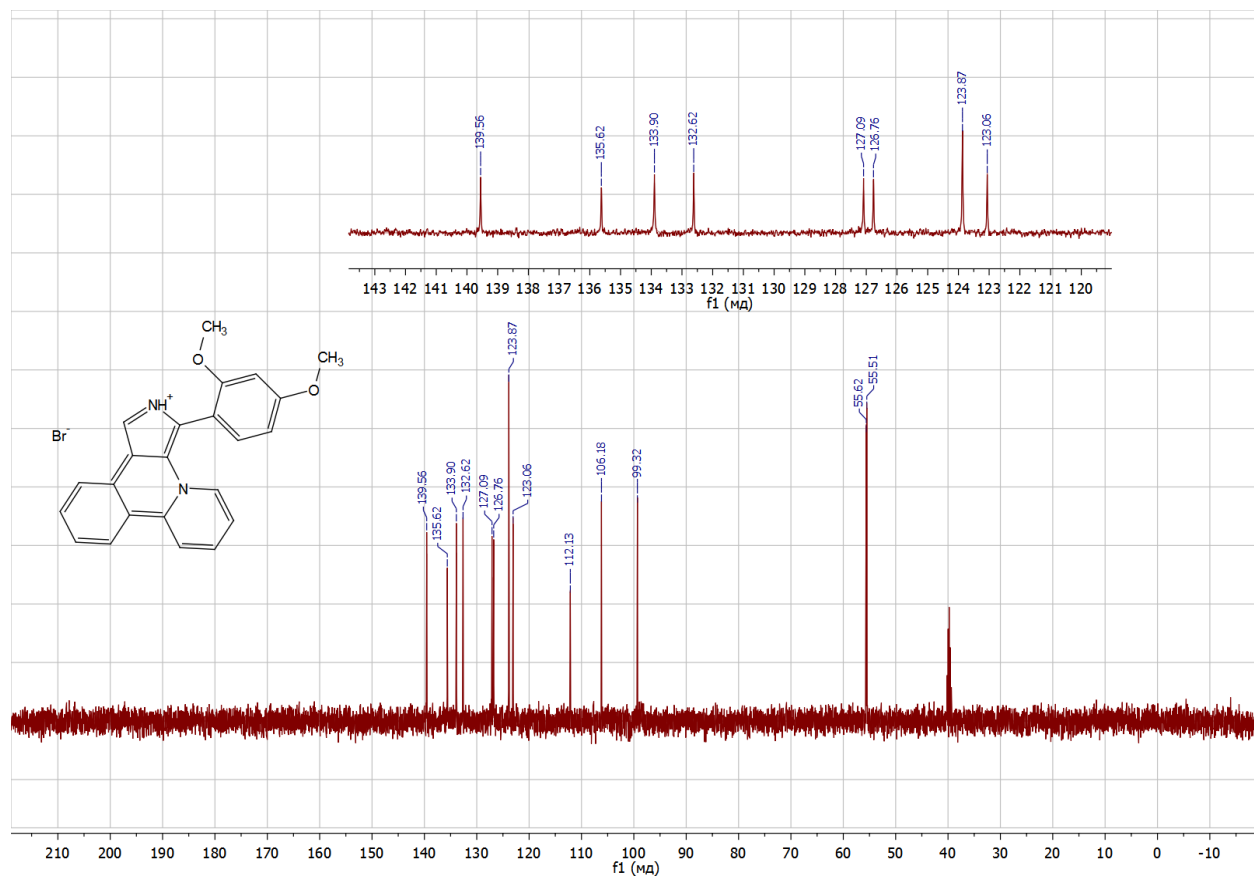

$^1\text{H}$  NMR (500 MHz,  $\text{DMSO-}d_6$ ) of 3-(4-cyanophenyl)pyrido[2,1-*a*]pyrrolo[3,4-*c*]isoquinolin-2-ium bromide (**31**)

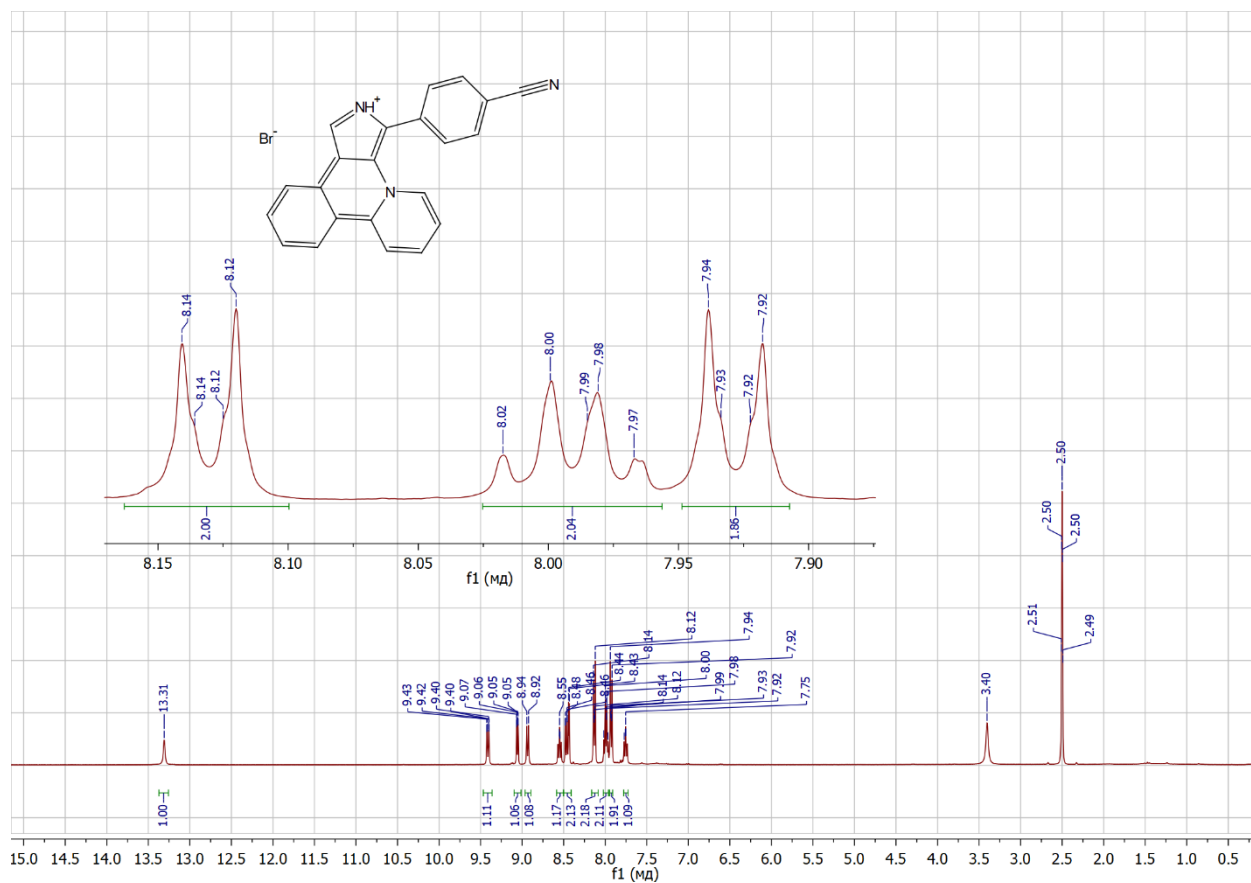

$^{13}\text{C}\{^1\text{H}\}$  NMR (126 MHz,  $\text{DMSO-}d_6$ ) of 3-(4-cyanophenyl)pyrido[2,1-*a*]pyrrolo[3,4-*c*]isoquinolin-2-ium bromide (**31**)

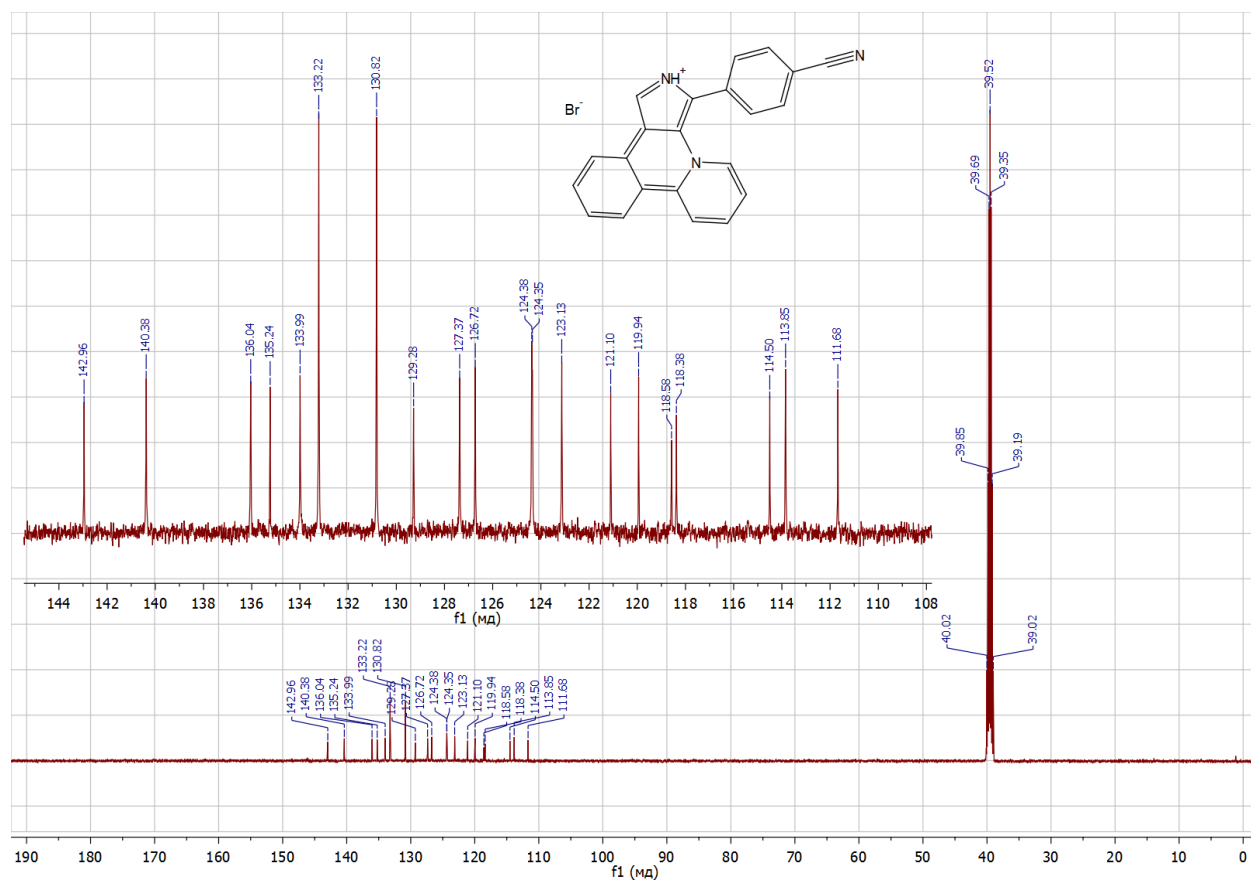

$^{13}\text{C}$  DEPT135 NMR (126 MHz,  $\text{DMSO-}d_6$ ) of 3-(4-cyanophenyl)pyrido[2,1-*a*]pyrrolo[3,4-*c*]isoquinolin-2-ium bromide (**31**)

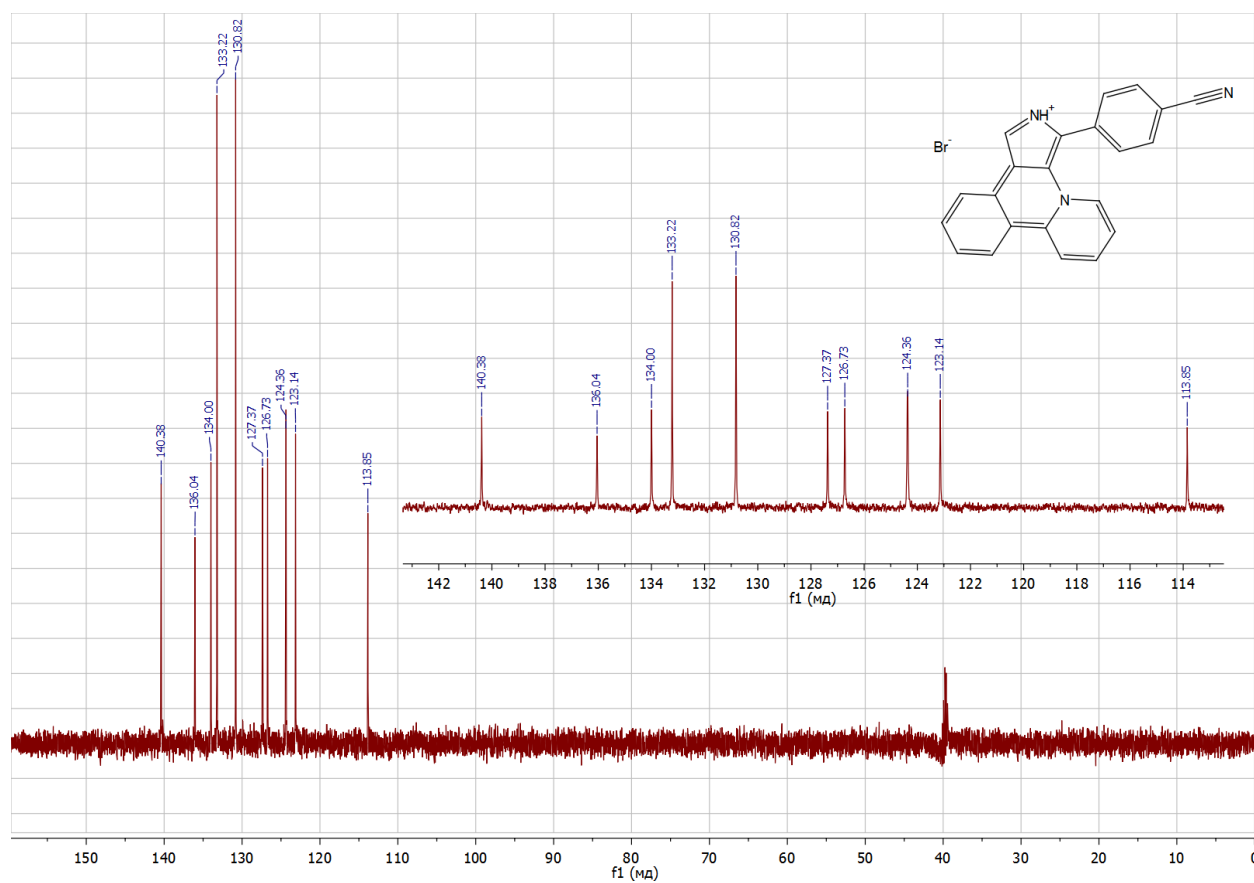



$^1\text{H}$  NMR (400 MHz,  $\text{DMSO}-d_6$ ) of 3-(pyridin-2-yl)pyrido[2,1-*a*]pyrrolo[3,4-*c*]isoquinolin-2-ium iodide (**3m**)

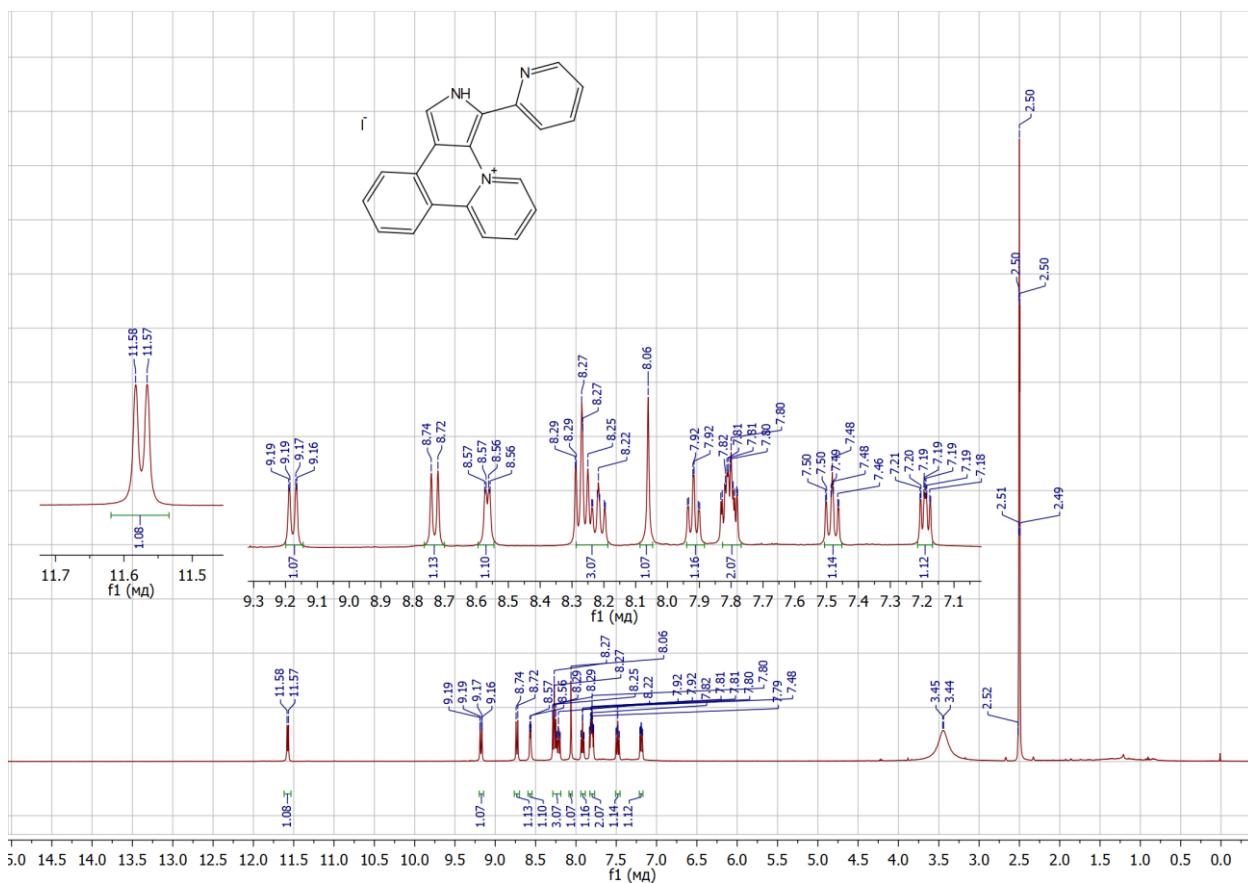

$^{13}\text{C}\{^1\text{H}\}$  NMR (101 MHz,  $\text{DMSO}-d_6$ ) of 3-(pyridin-2-yl)pyrido[2,1-*a*]pyrrolo[3,4-*c*]isoquinolin-2-ium iodide (**3m**)

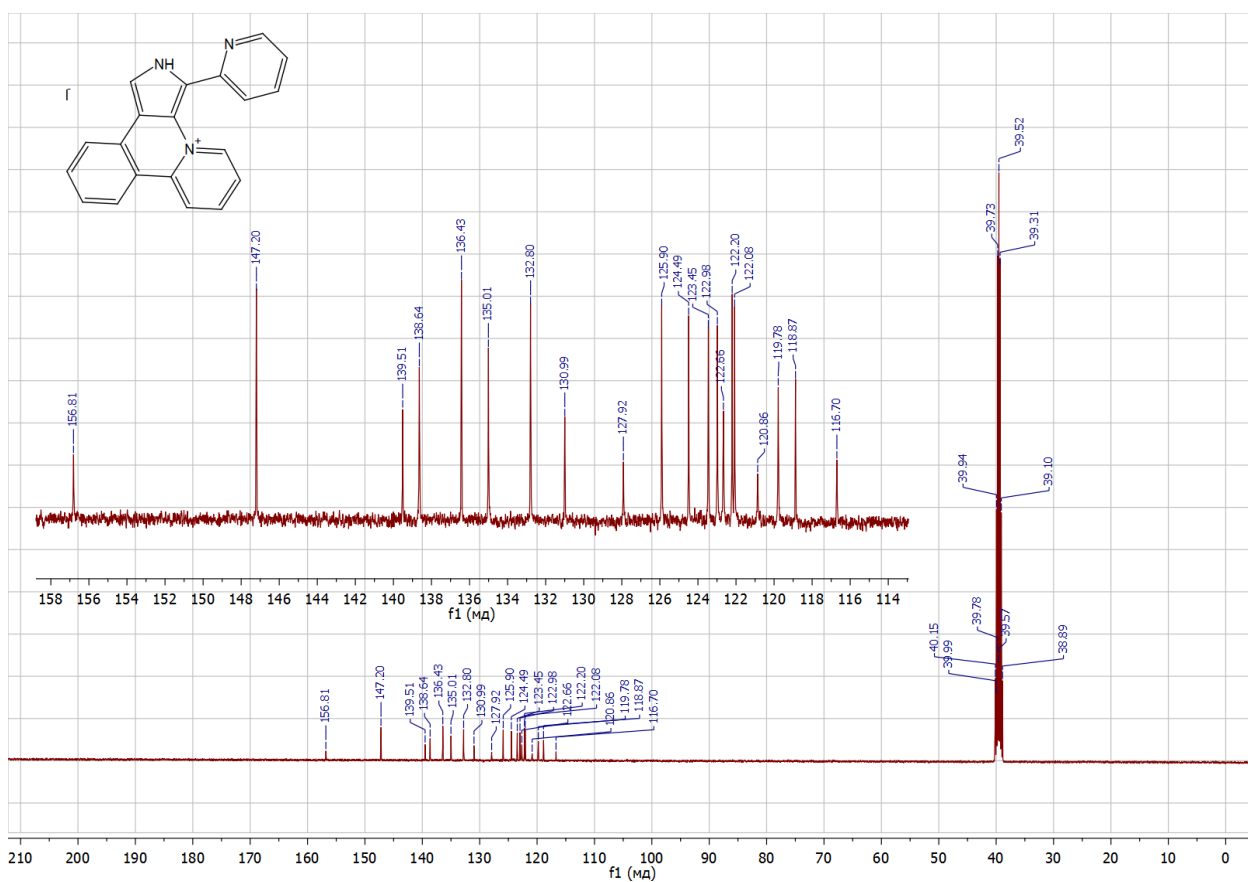

$^{13}\text{C}$  DEPT135 NMR (101 MHz,  $\text{DMSO-}d_6$ ) of 3-(pyridin-2-yl)pyrido[2,1-*a*]pyrrolo[3,4-*c*]isoquinolin-2-ium iodide (**3m**)

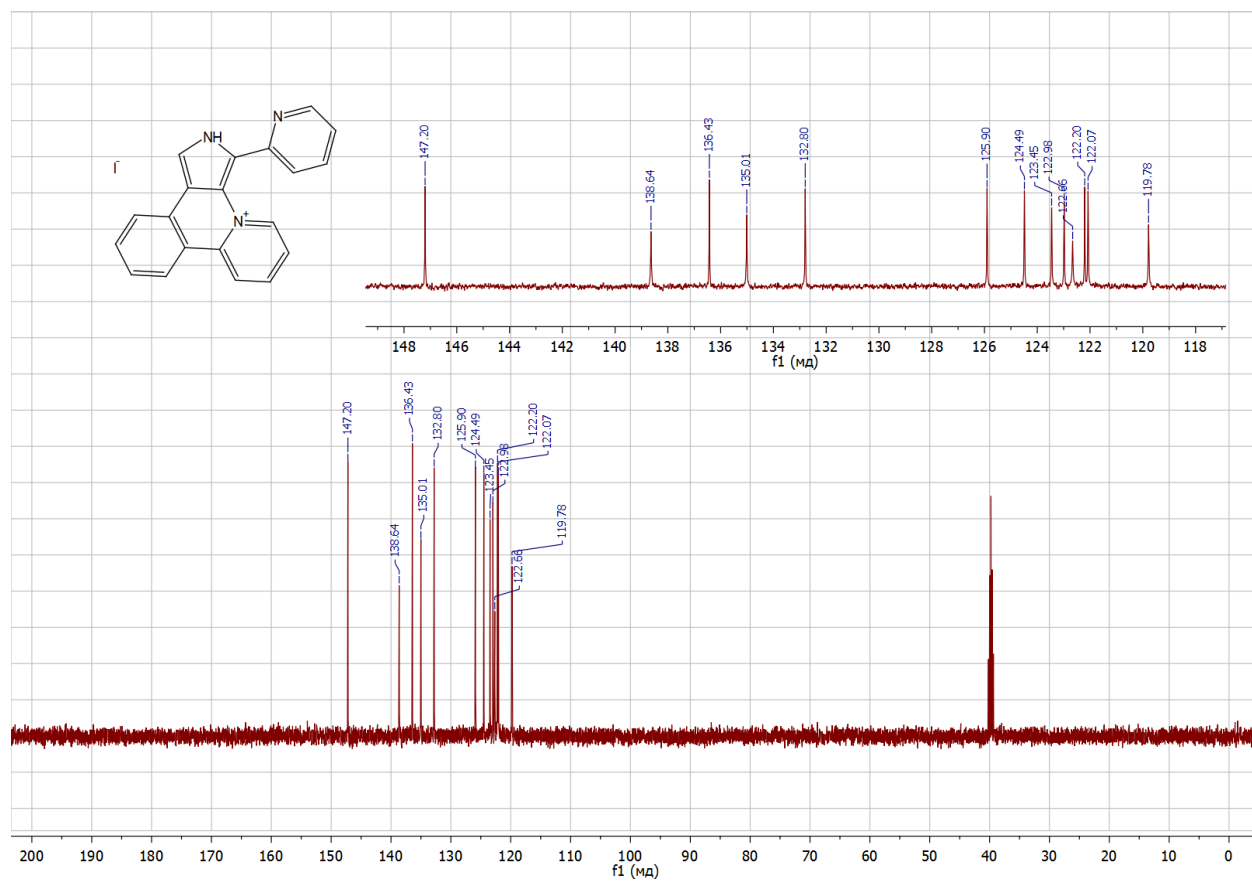

$^1\text{H}$  NMR (400 MHz,  $\text{DMSO-}d_6$ ) of 7-methyl-3-phenylpyrido[2,1-*a*]pyrrolo[3,4-*c*]isoquinolin-2-ium bromide (**3n**)

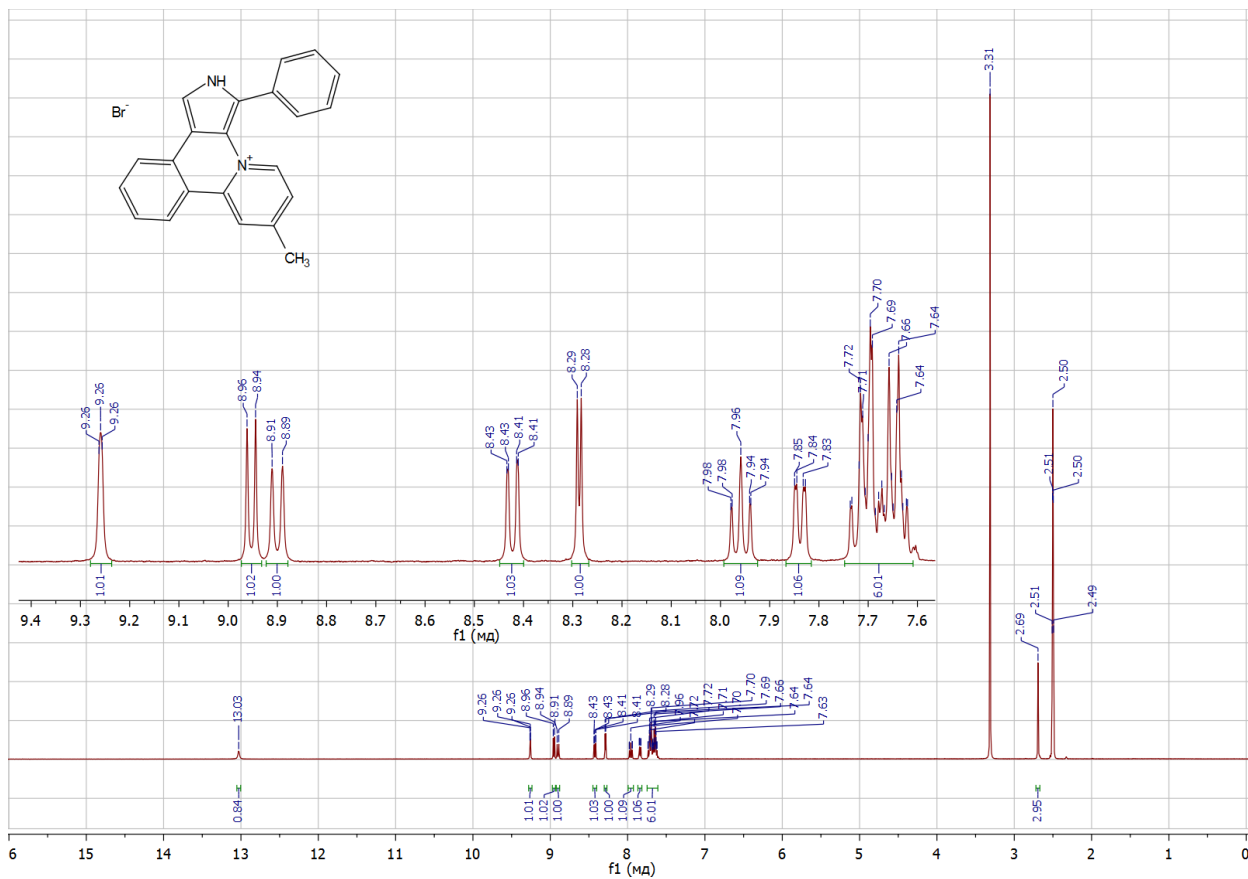

$^{13}\text{C}\{^1\text{H}\}$  NMR (101 MHz,  $\text{DMSO-}d_6$ ) of 7-methyl-3-phenylpyrido[2,1-*a*]pyrrolo[3,4-*c*]isoquinolin-2-ium bromide (**3n**)

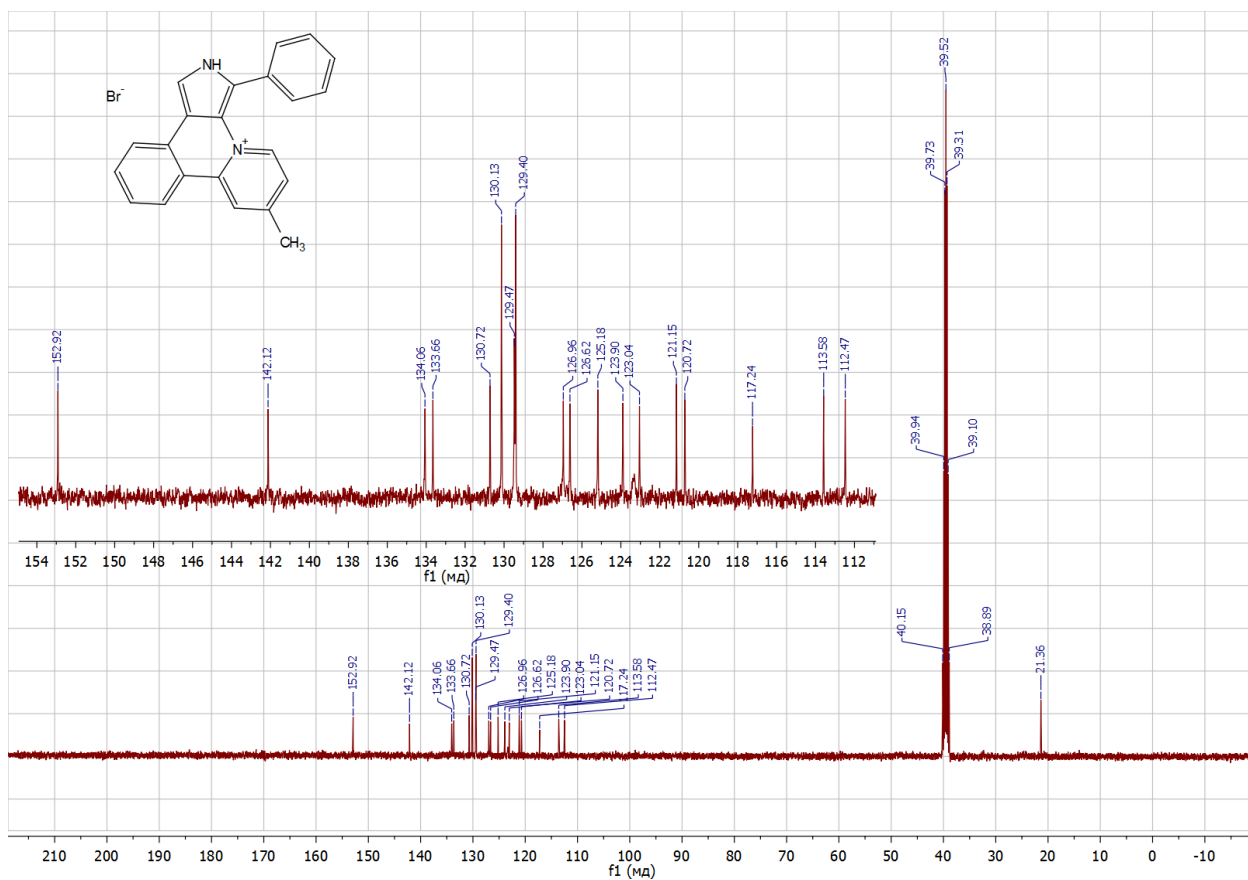

$^{13}\text{C}$  DEPT135 NMR (101 MHz,  $\text{DMSO-}d_6$ ) of 7-methyl-3-phenylpyrido[2,1-*a*]pyrrolo[3,4-*c*]isoquinolin-2-ium bromide (**3n**)

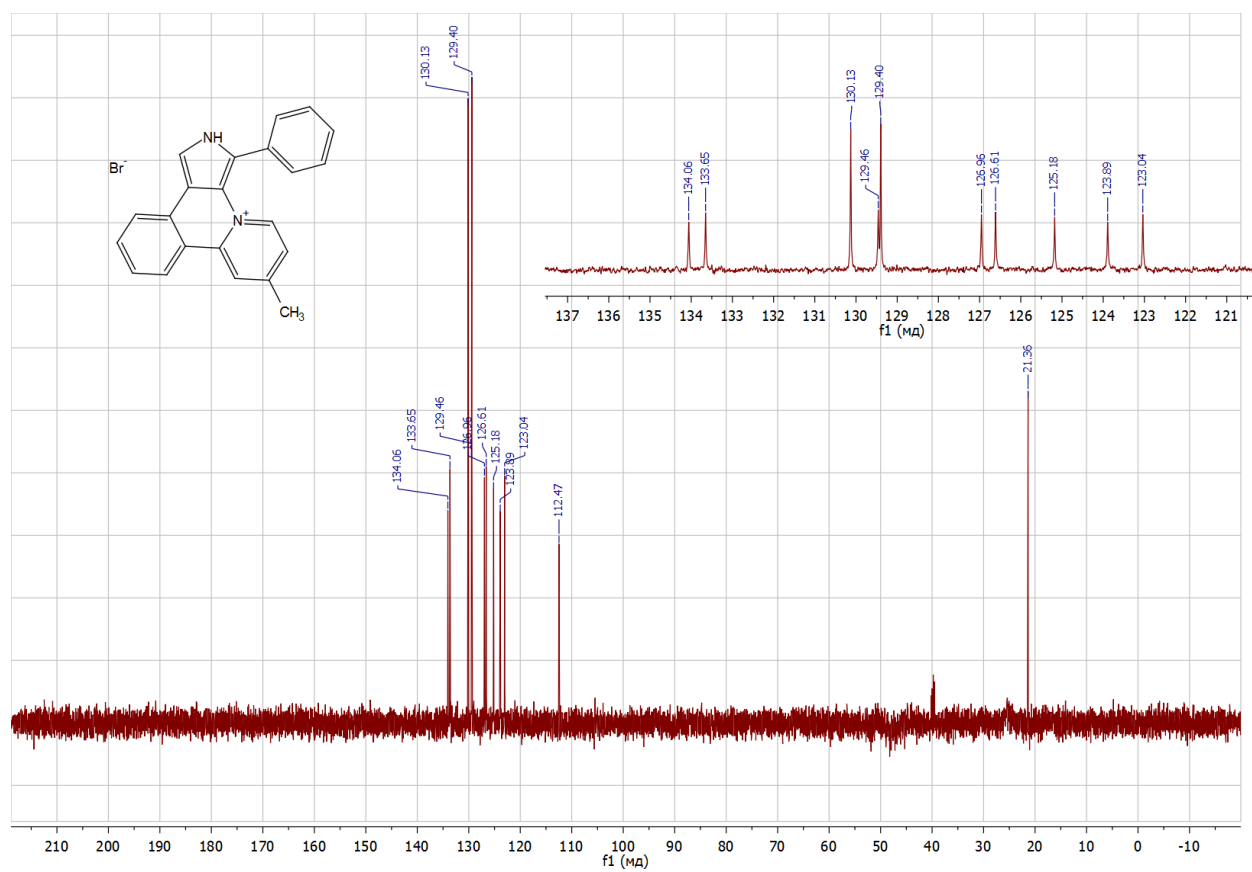

$^1\text{H}$  NMR (400 MHz,  $\text{DMSO-}d_6$ ) of 7-methoxy-3-phenylpyrido[2,1-*a*]pyrrolo[3,4-*c*]isoquinolin-2-ium bromide (**30**)

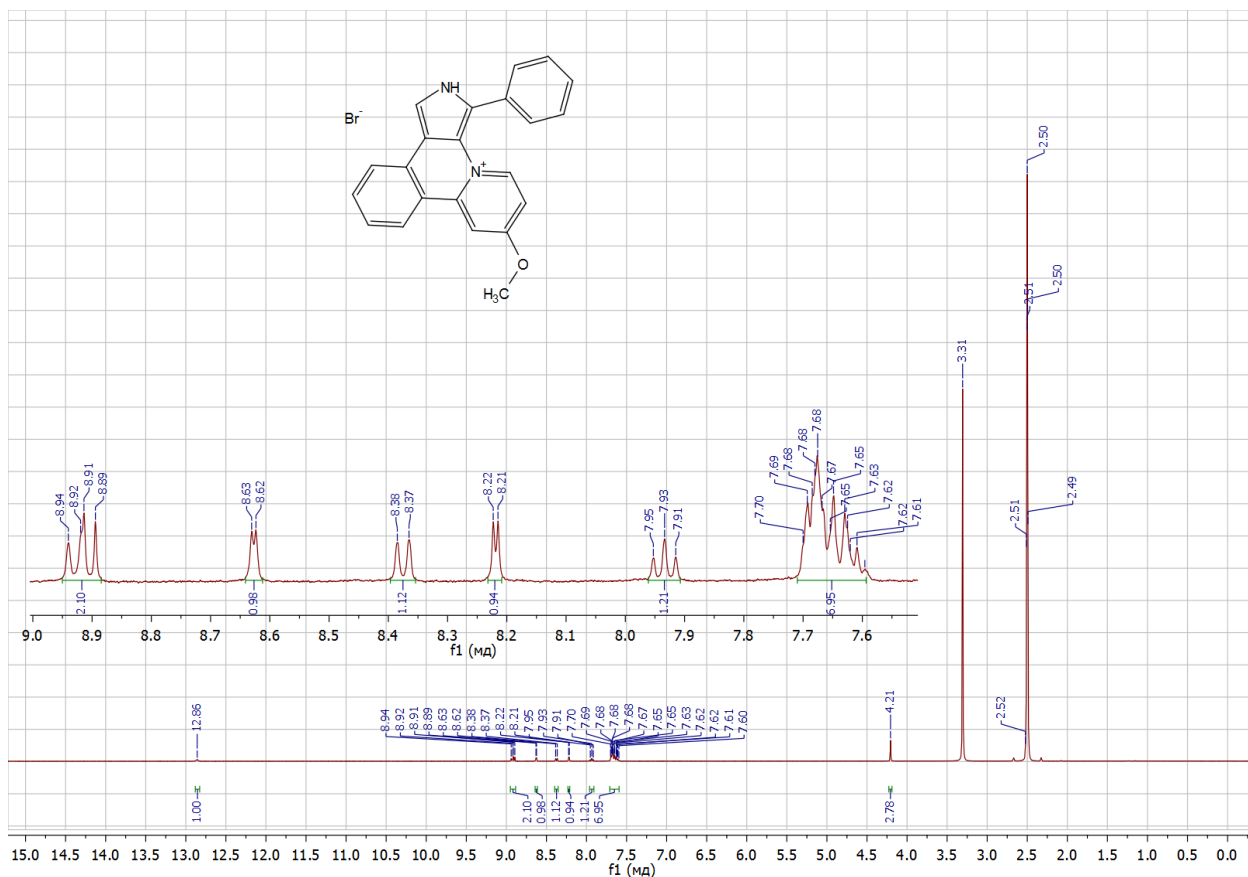

$^{13}\text{C}\{^1\text{H}\}$  NMR (101 MHz,  $\text{DMSO-}d_6$ ) of 7-methoxy-3-phenylpyrido[2,1-*a*]pyrrolo[3,4-*c*]isoquinolin-2-ium bromide (**30**)

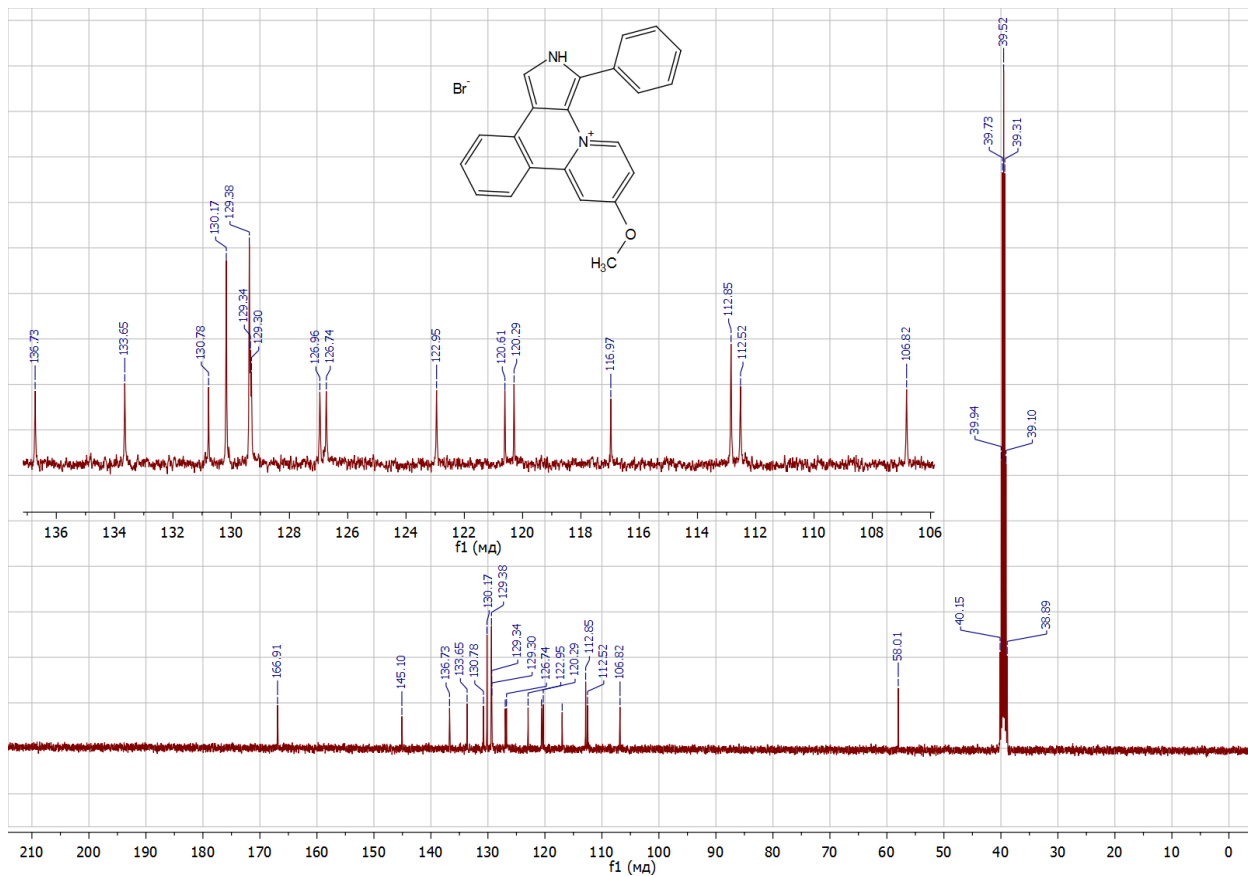

$^{13}\text{C}$  DEPT135 NMR (101 MHz,  $\text{DMSO}-d_6$ ) of 7-methoxy-3-phenylpyrido[2,1-*a*]pyrrolo[3,4-*c*]isoquinolin-2-ium bromide (**3o**)

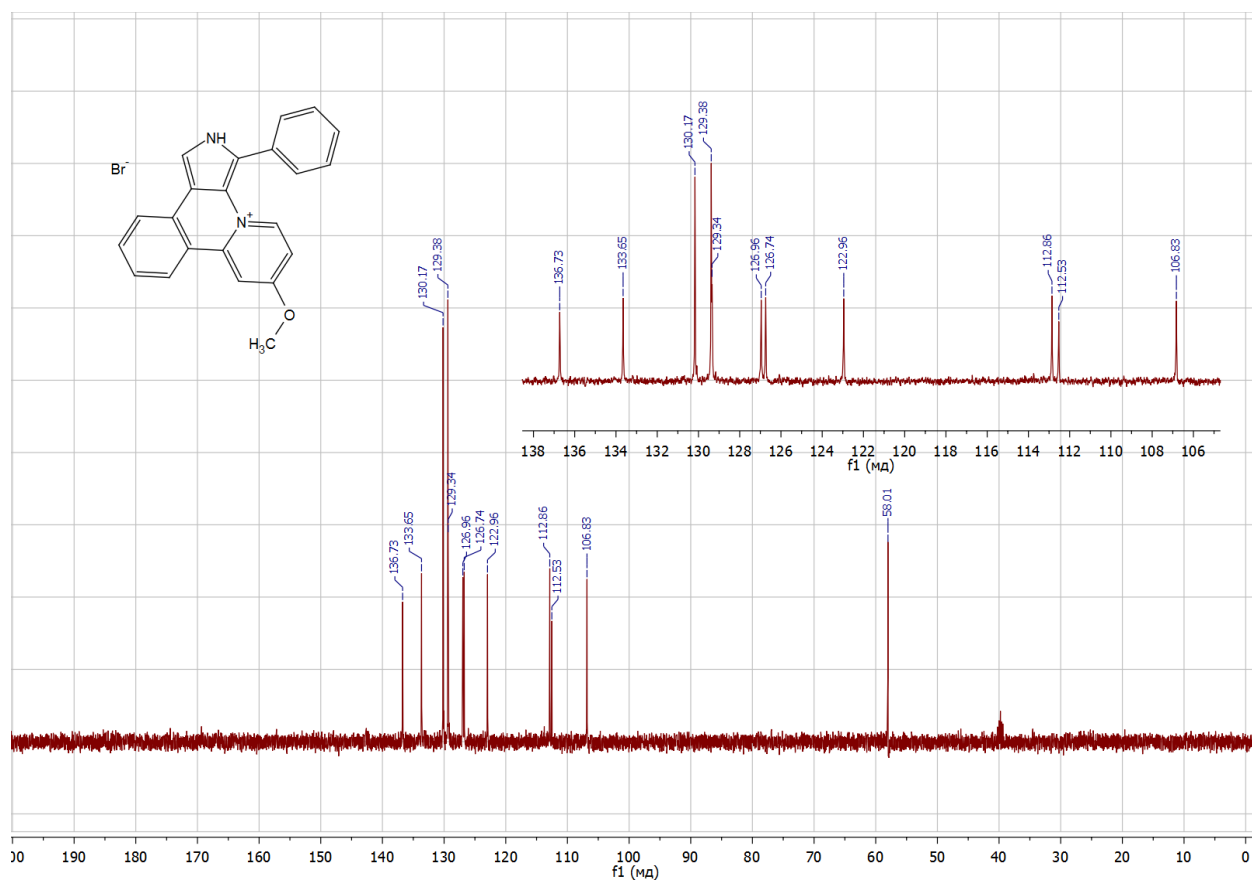

$^1\text{H}$  NMR (400 MHz,  $\text{DMSO-}d_6$ ) of 7-(dimethylamino)-3-phenylpyrido[2,1-*a*]pyrrolo[3,4-*c*]isoquinolin-2-ium bromide (**3p**)

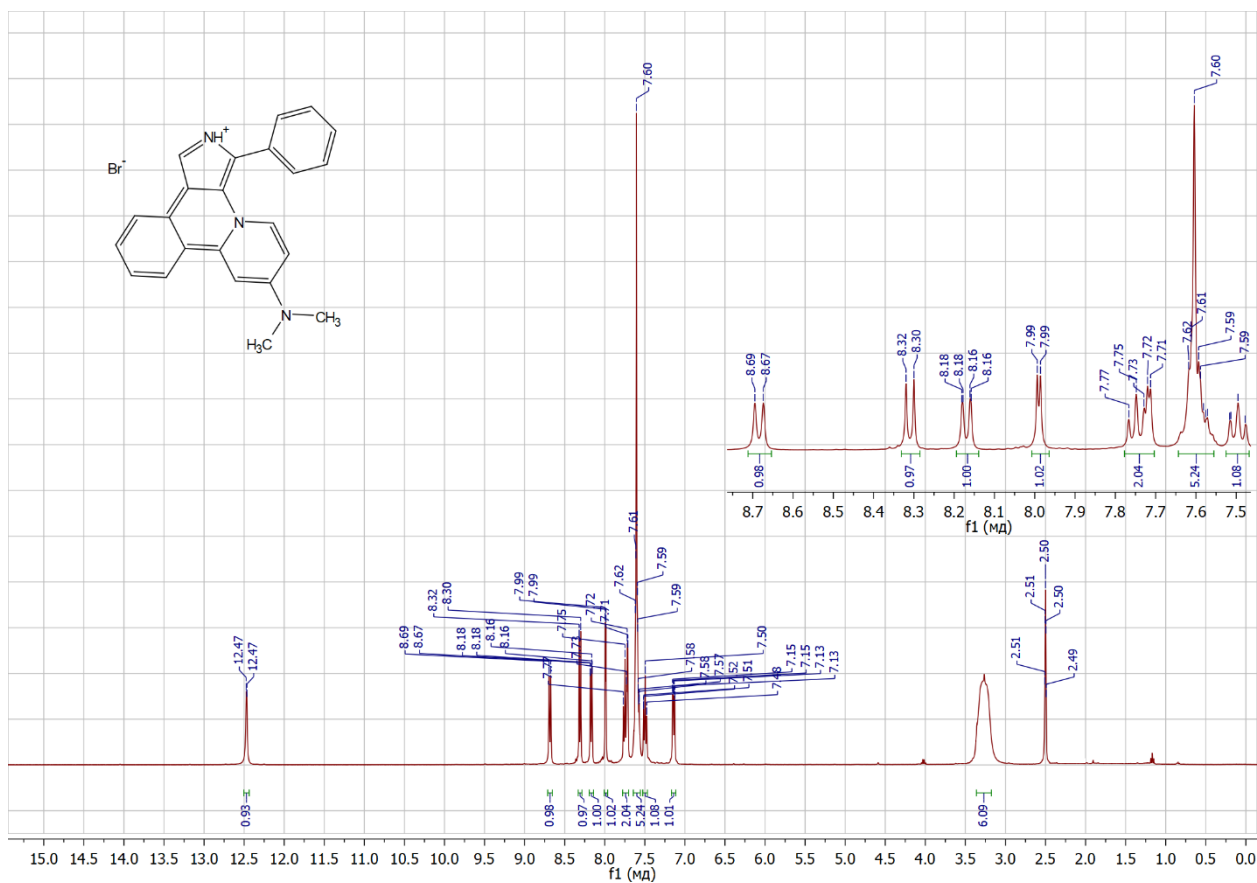

$^{13}\text{C}\{^1\text{H}\}$  NMR (101 MHz,  $\text{DMSO-}d_6$ ) of 7-(dimethylamino)-3-phenylpyrido[2,1-*a*]pyrrolo[3,4-*c*]isoquinolin-2-ium bromide (**3p**)

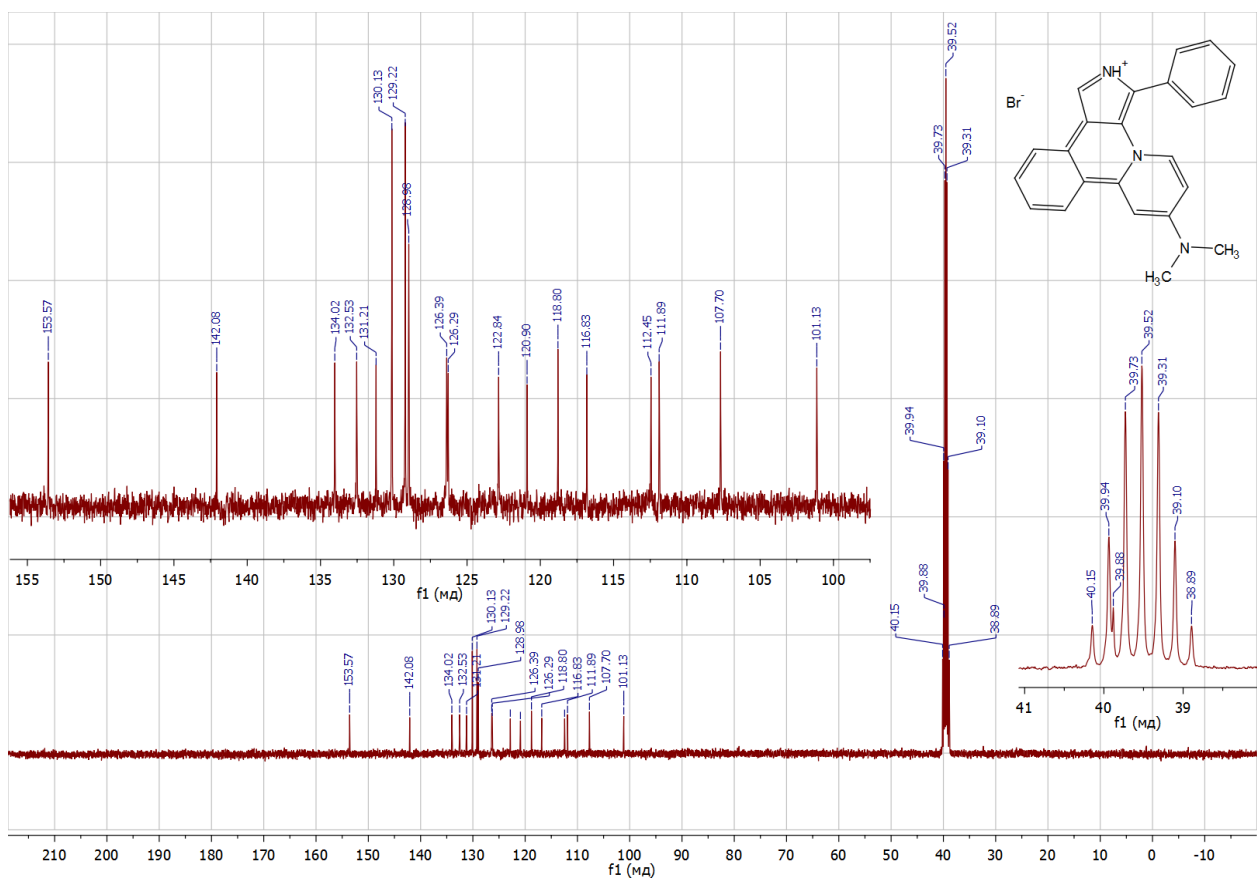

$^{13}\text{C}$  DEPT135 NMR (101 MHz,  $\text{DMSO-}d_6$ ) of 7-(dimethylamino)-3-phenylpyrido[2,1-*a*]pyrrolo[3,4-*c*]isoquinolin-2-ium bromide (**3p**)

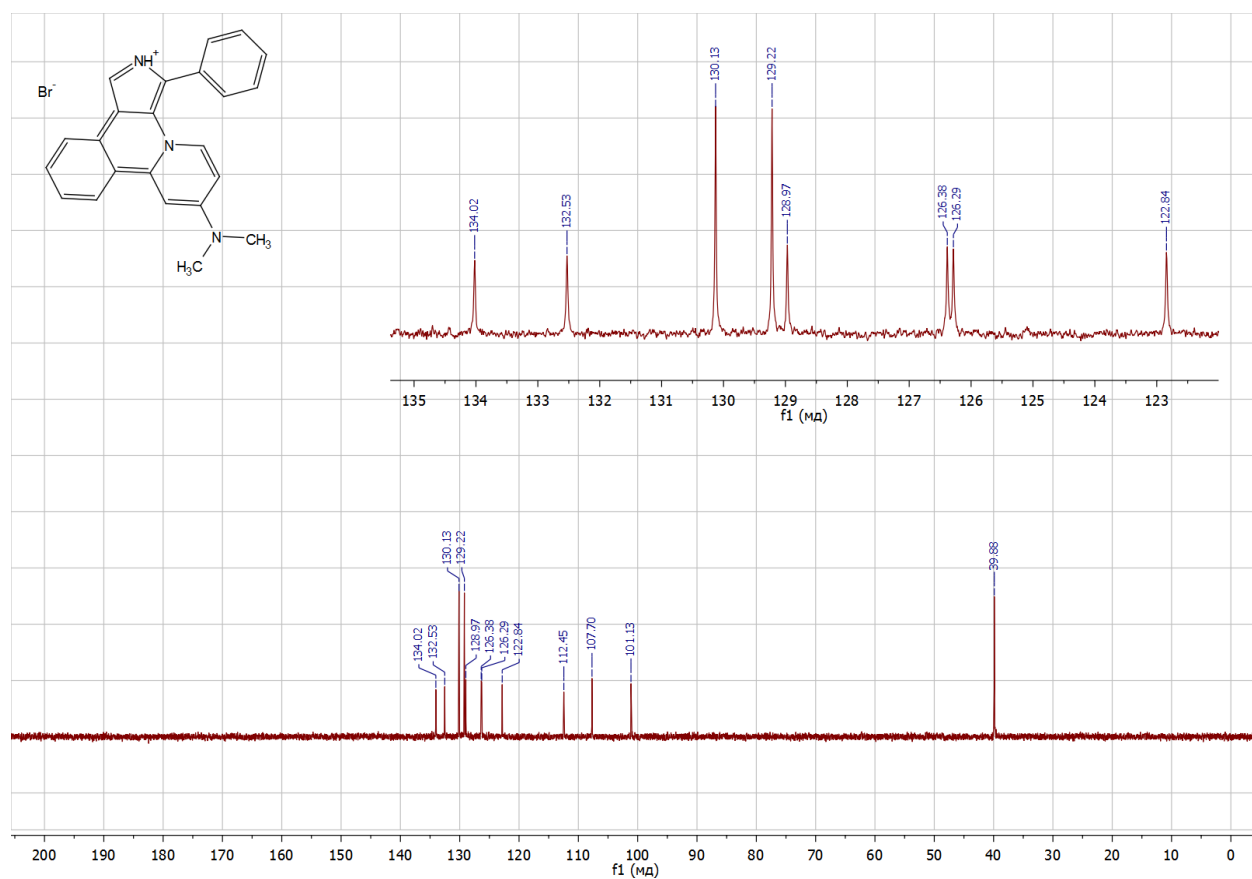



$^1\text{H}$  NMR (400 MHz,  $\text{DMSO-}d_6$ ) of 3,7-diphenylpyrido[2,1-*a*]pyrrolo[3,4-*c*]isoquinolin-2-ium bromide (**3q**)

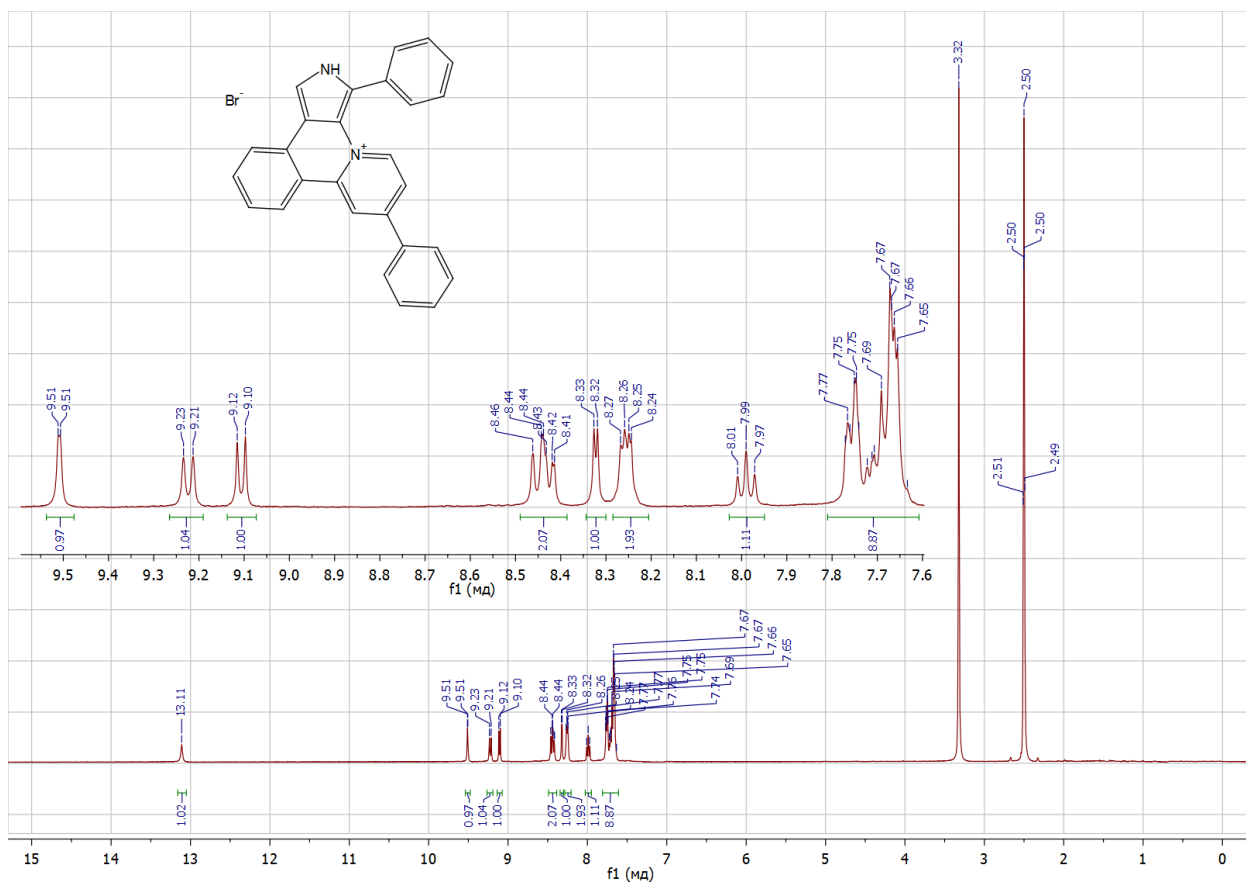

$^{13}\text{C}\{^1\text{H}\}$  NMR (101 MHz,  $\text{DMSO-}d_6$ ) of 3,7-diphenylpyrido[2,1-*a*]pyrrolo[3,4-*c*]isoquinolin-2-ium bromide (**3q**)

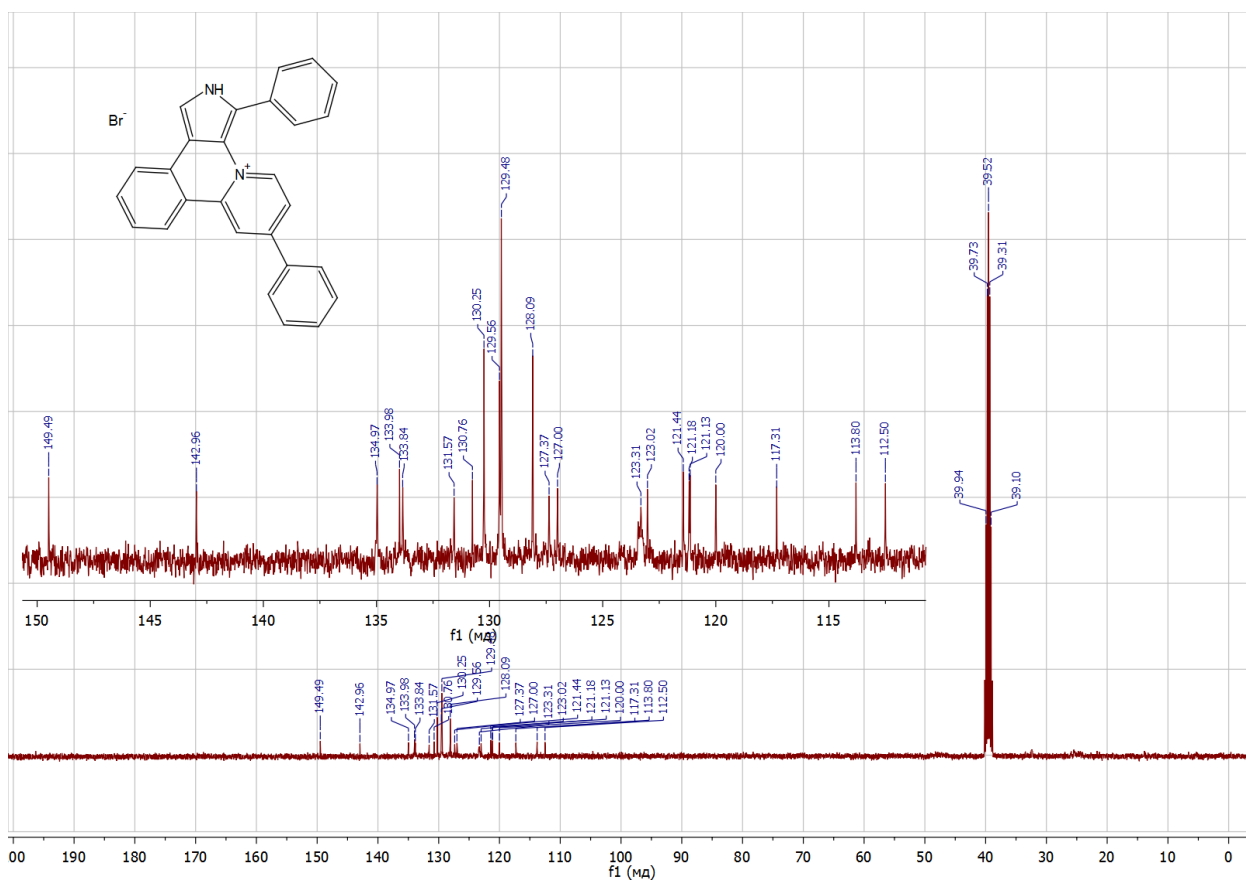

$^{13}\text{C}$  DEPT135 NMR (101 MHz,  $\text{DMSO-}d_6$ ) of 3,7-diphenylpyrido[2,1-*a*]pyrrolo[3,4-*c*]isoquinolin-2-ium bromide (**3q**)

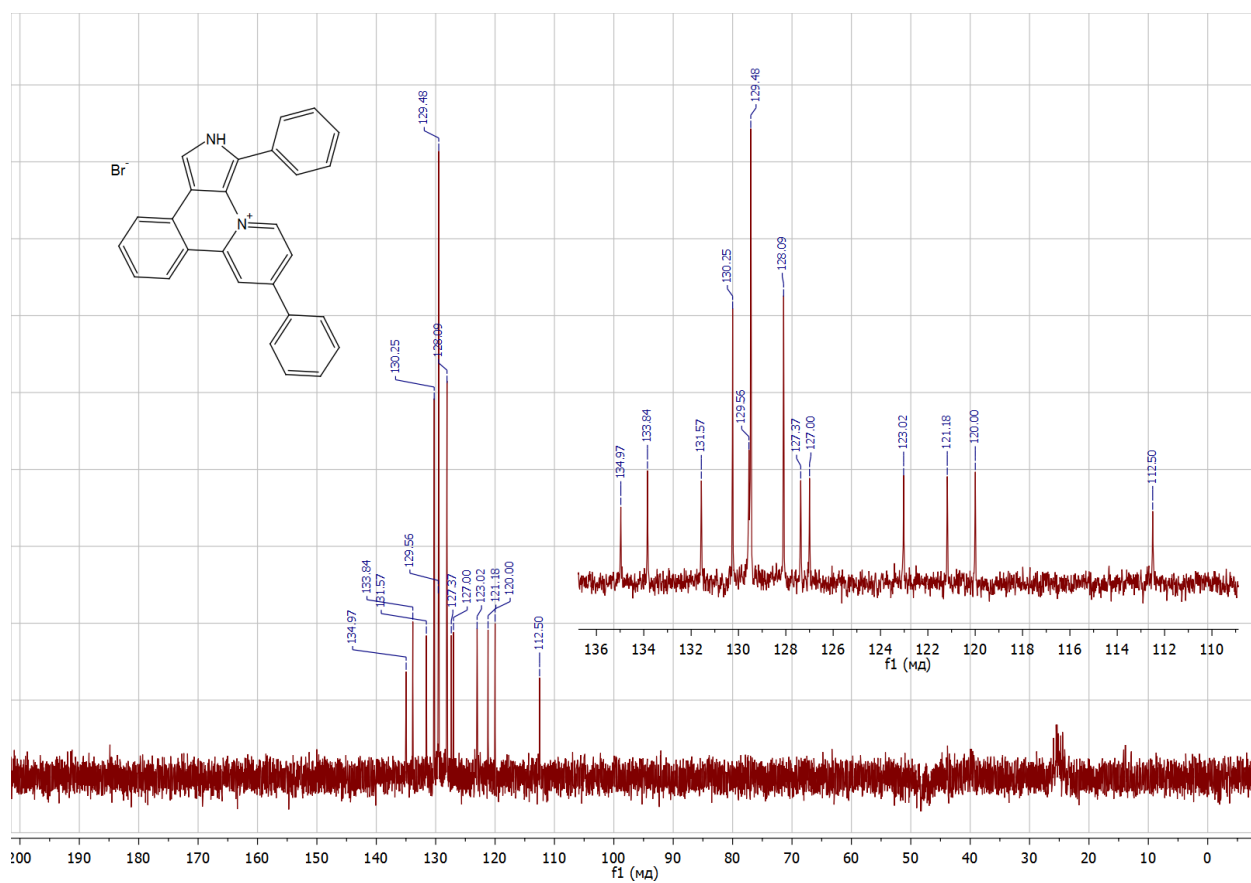

$^1\text{H}$  NMR (500 MHz,  $\text{DMSO}-d_6$ ) of 7-(4-methoxyphenyl)-3-phenylpyrido[2,1-*a*]pyrrolo[3,4-*c*]isoquinolin-2-ium bromide (**3r**)

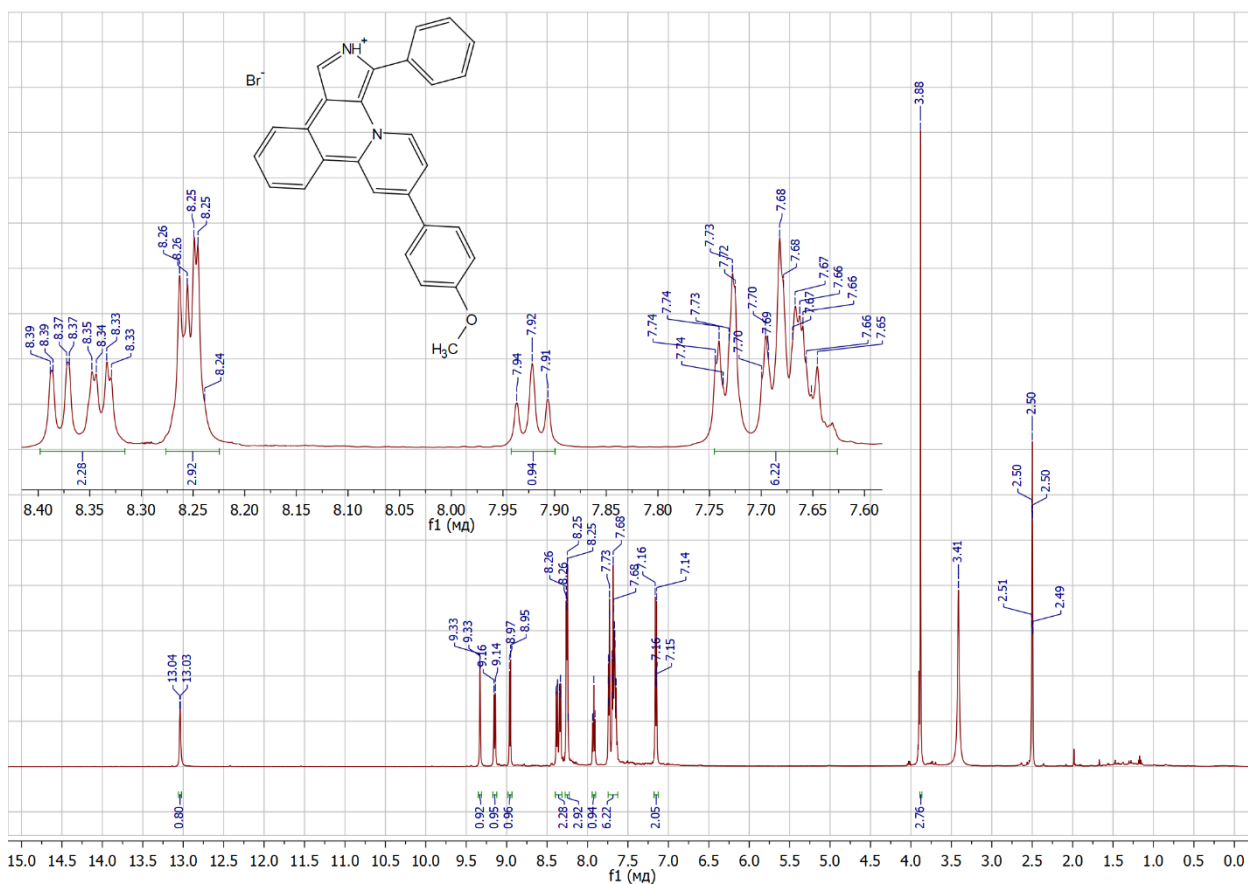

$^{13}\text{C}\{^1\text{H}\}$  NMR (126 MHz,  $\text{DMSO}-d_6$ ) of 7-(4-methoxyphenyl)-3-phenylpyrido[2,1-*a*]pyrrolo[3,4-*c*]isoquinolin-2-ium bromide (**3r**)

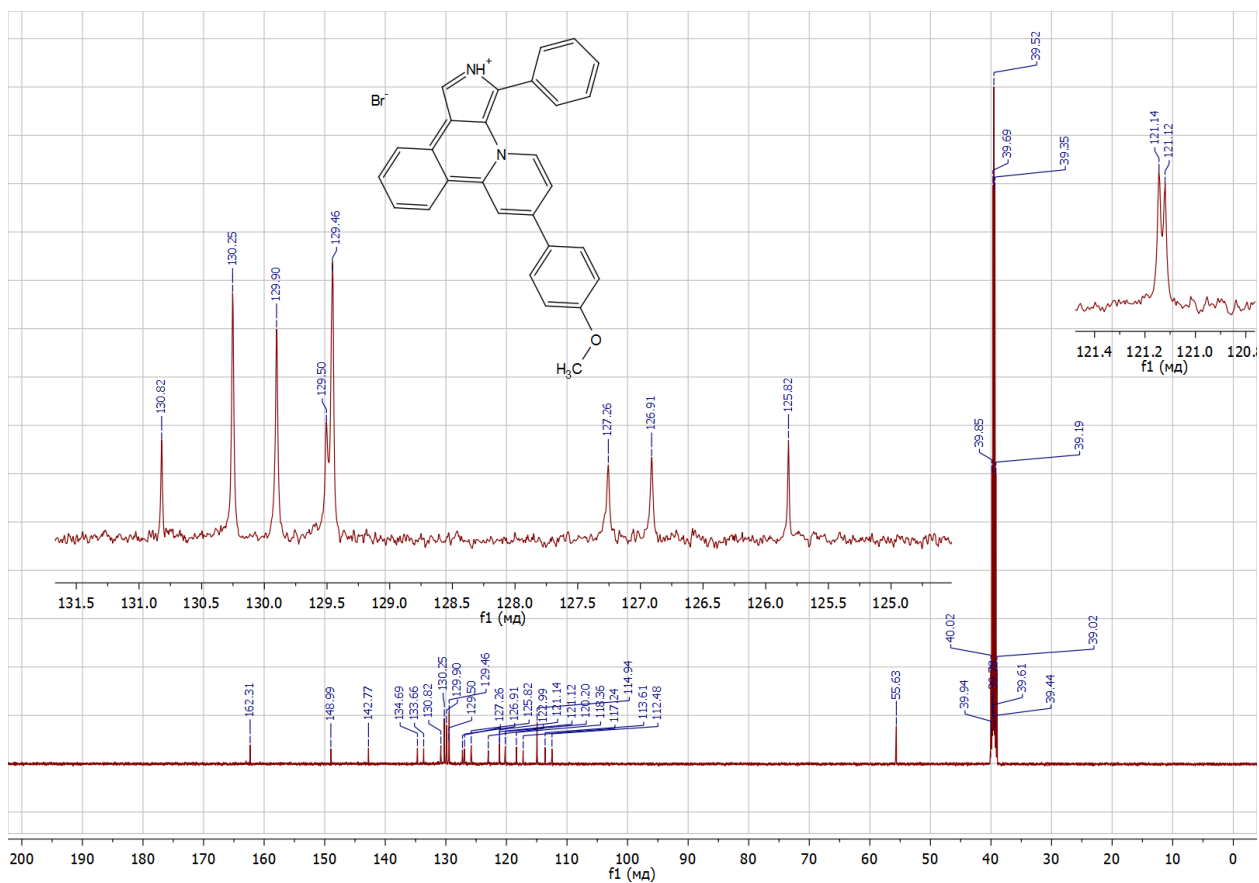

$^{13}\text{C}$  DEPT135 NMR (126 MHz,  $\text{DMSO-}d_6$ ) of 7-(4-methoxyphenyl)-3-phenylpyrido[2,1-*a*]pyrrolo[3,4-*c*]isoquinolin-2-ium bromide (**3r**)

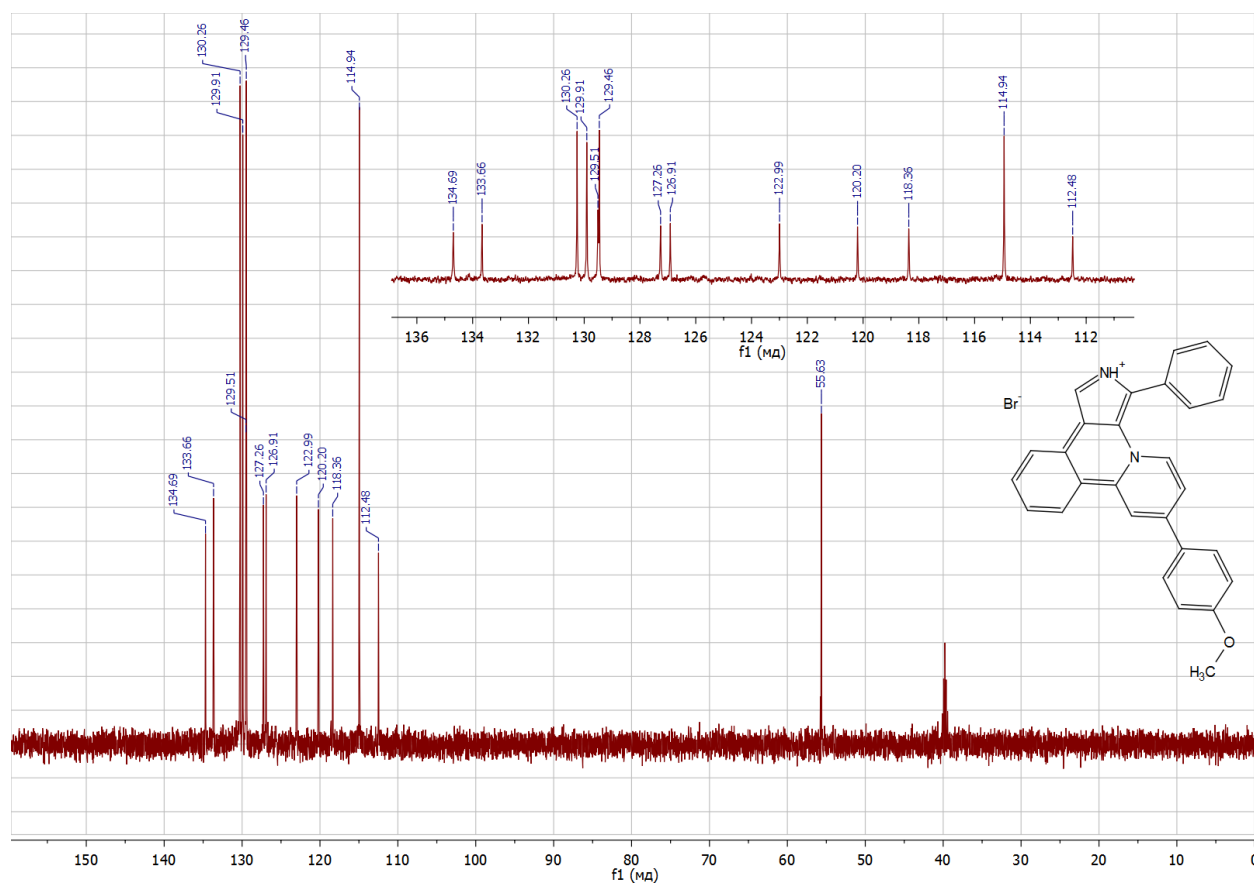

$^1\text{H}$  NMR (400 MHz,  $\text{DMSO-}d_6$ ) of 6,8-dimethyl-3-phenylpyrido[2,1-*a*]pyrrolo[3,4-*c*]isoquinolin-2-ium bromide (**3s**)

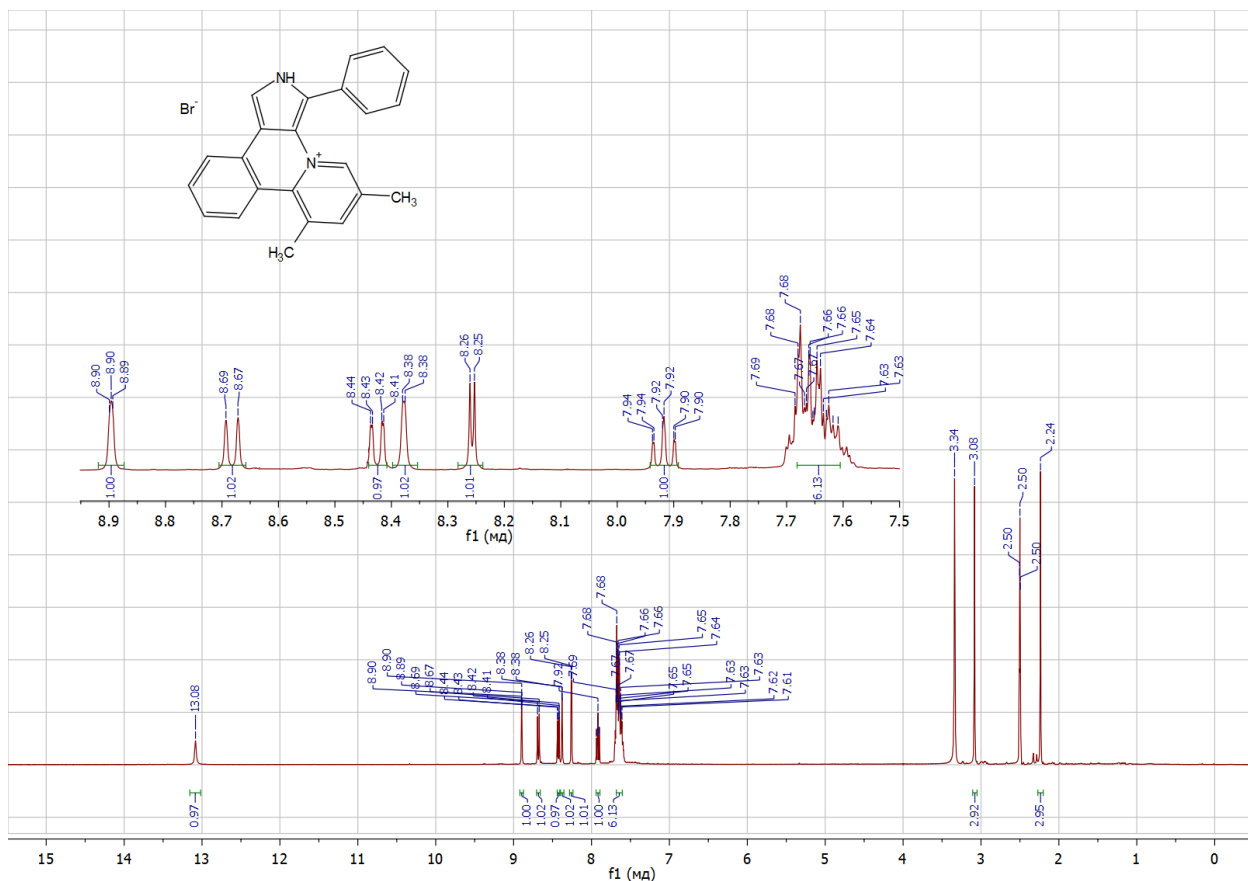

$^{13}\text{C}\{^1\text{H}\}$  NMR (101 MHz,  $\text{DMSO-}d_6$ ) of 6,8-dimethyl-3-phenylpyrido[2,1-*a*]pyrrolo[3,4-*c*]isoquinolin-2-ium bromide (**3s**)

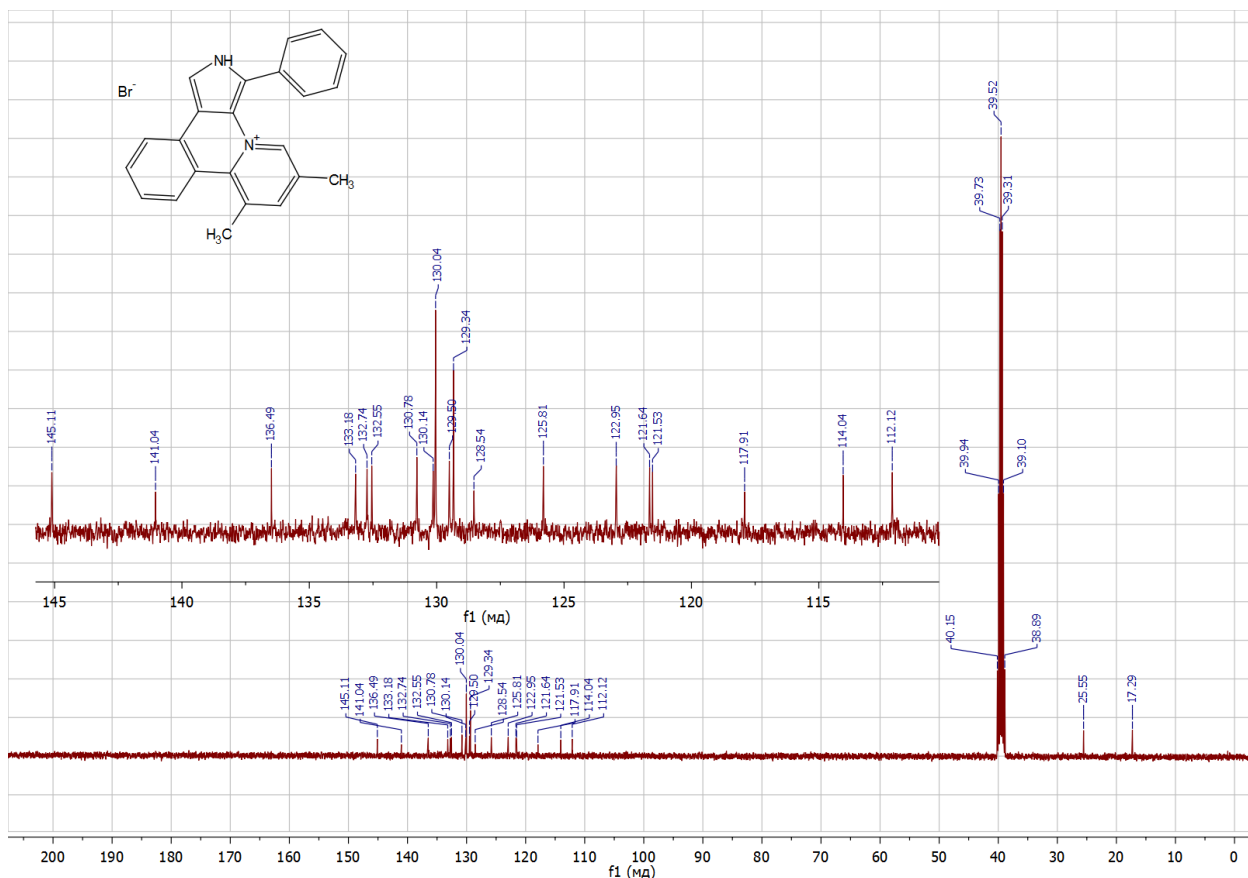

$^{13}\text{C}$  DEPT135 NMR (101 MHz,  $\text{DMSO-}d_6$ ) of 6,8-dimethyl-3-phenylpyrido[2,1-*a*]pyrrolo[3,4-*c*]isoquinolin-2-ium bromide (**3s**)

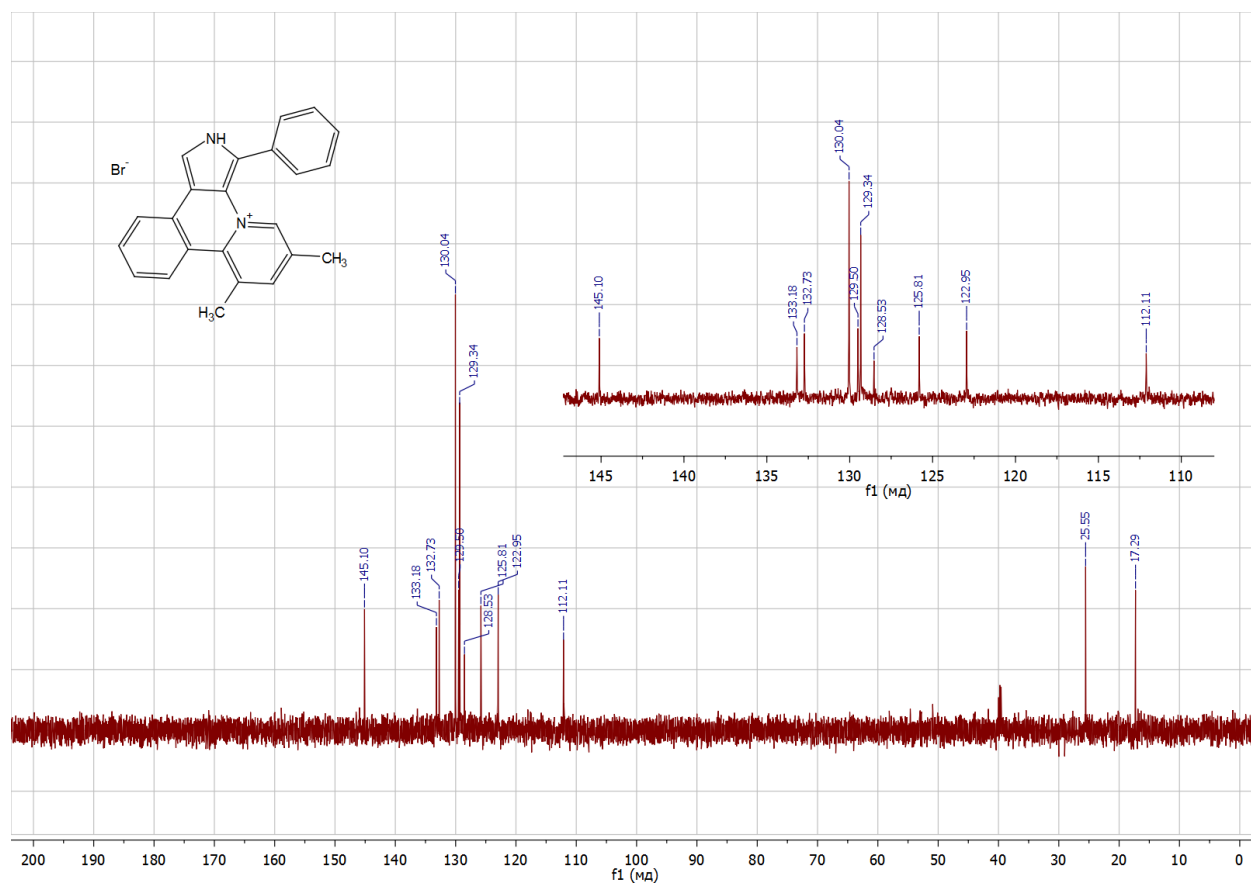

$^1\text{H}$  NMR (400 MHz,  $\text{DMSO}-d_6$ ) of 1-(2-(2,4-dimethoxyphenyl)-2-oxoethyl)pyridin-1-ium bromide (**5i**)

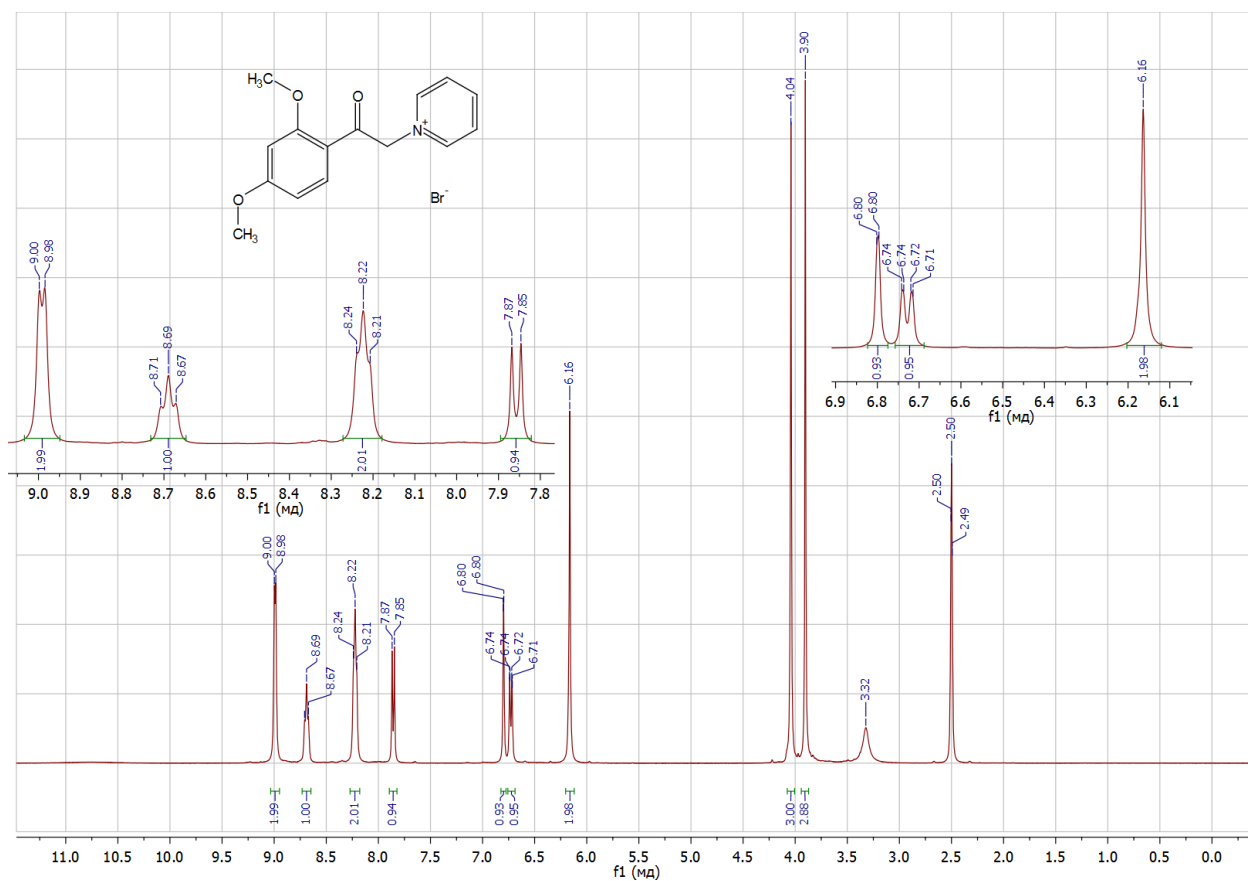

$^{13}\text{C}\{^1\text{H}\}$  NMR (101 MHz,  $\text{DMSO}-d_6$ ) of 1-(2-(2,4-dimethoxyphenyl)-2-oxoethyl)pyridin-1-ium bromide (**5i**)

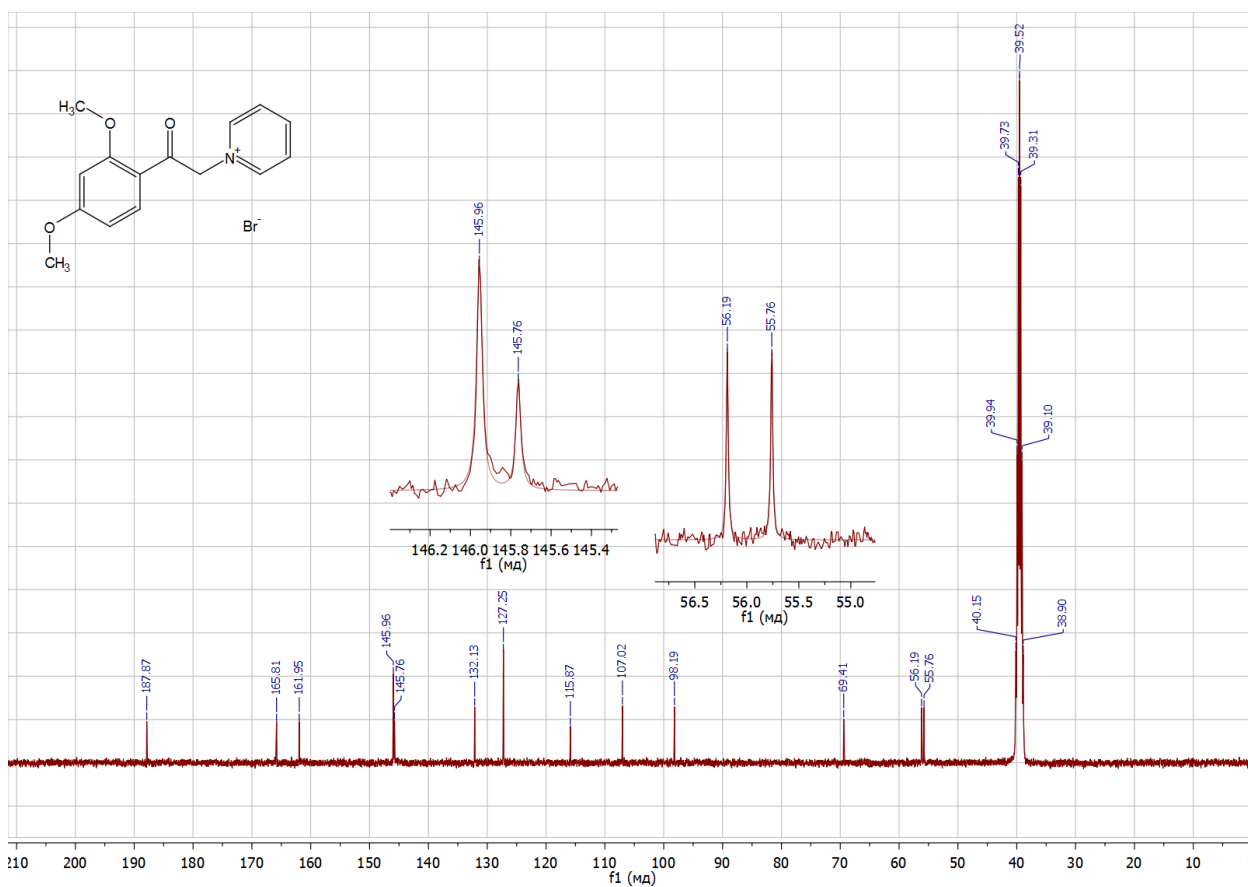

$^{13}\text{C}$  DEPT135 NMR (101 MHz,  $\text{DMSO-}d_6$ ) of 1-(2-(2,4-dimethoxyphenyl)-2-oxoethyl)pyridin-1-ium bromide (**5i**)

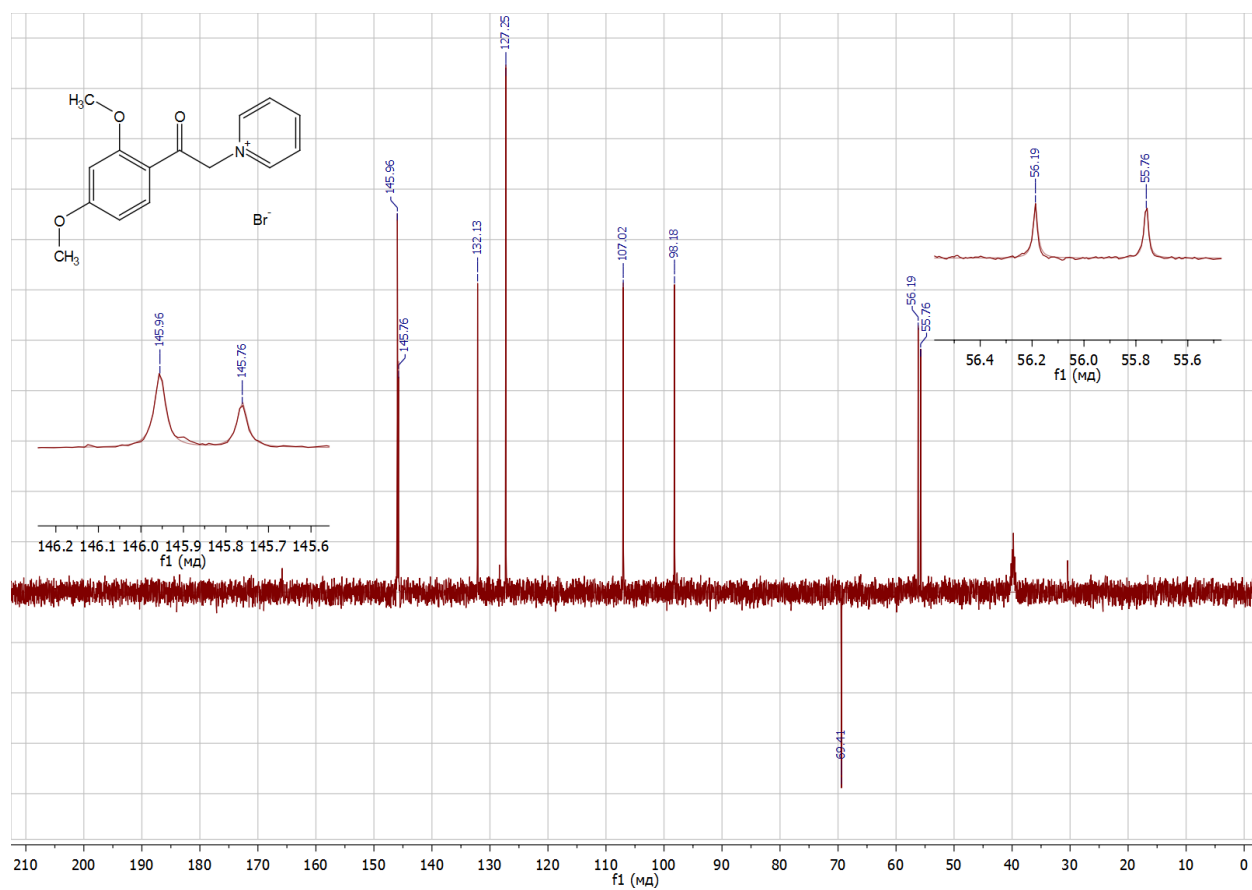



$^1\text{H}$  NMR (400 MHz,  $\text{DMSO-d}_6$ ) of 4-(4-methoxyphenyl)-1-(2-oxo-2-phenylethyl)pyridin-1-ium bromide (**5r**).

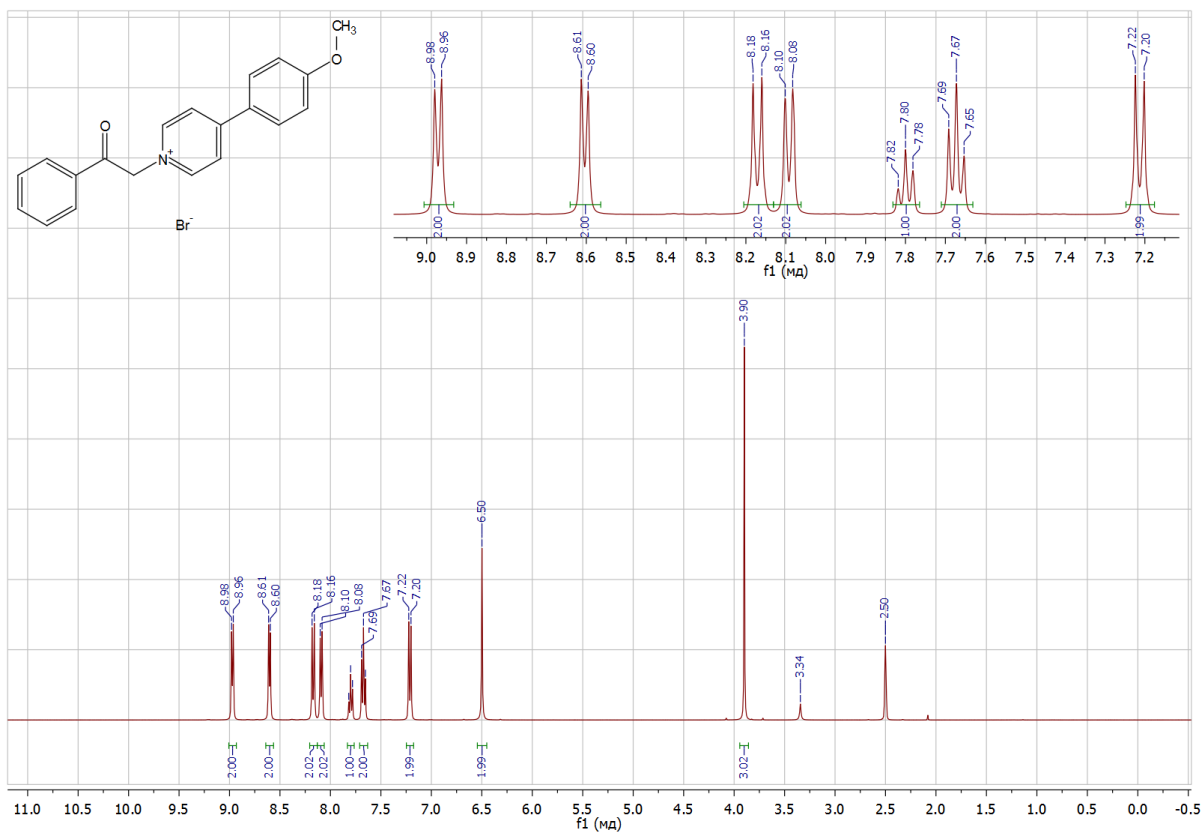

$^{13}\text{C}\{^1\text{H}\}$  NMR (101 MHz,  $\text{DMSO-d}_6$ ) of 4-(4-methoxyphenyl)-1-(2-oxo-2-phenylethyl)pyridin-1-ium bromide (**5r**).

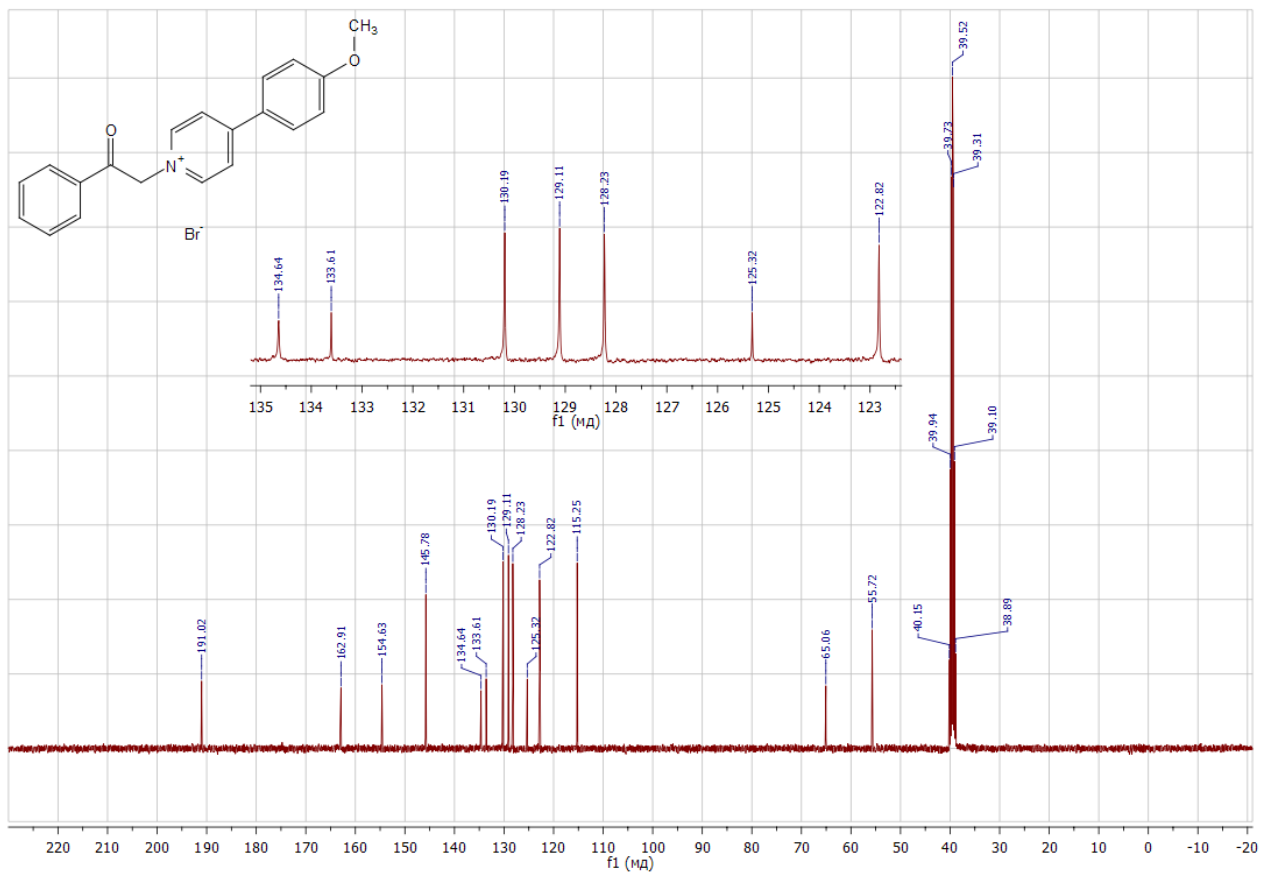

$^{13}\text{C}$  DEPT135 NMR (101 MHz,  $\text{DMSO-}d_6$ ) of 4-(4-methoxyphenyl)-1-(2-oxo-2-phenylethyl)pyridin-1-ium bromide (**5r**).

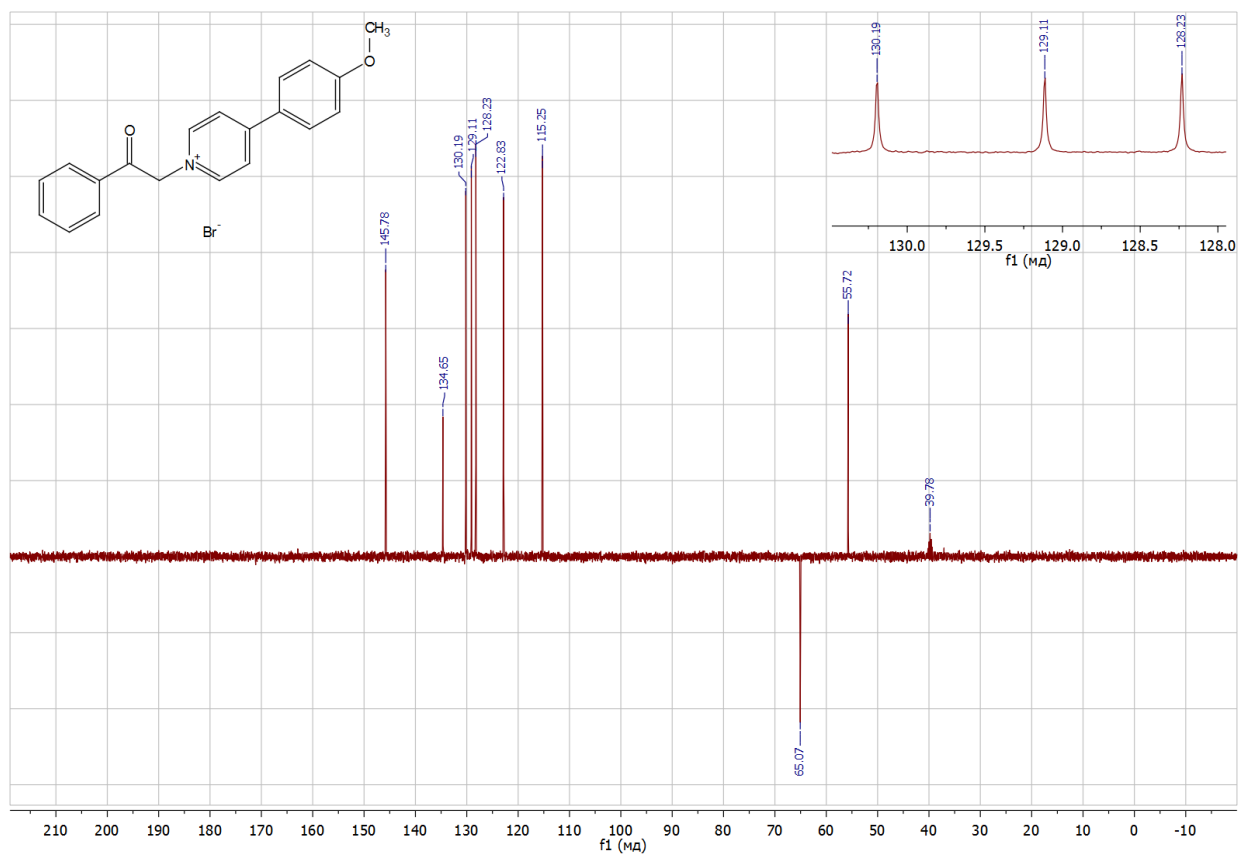

$^1\text{H}$  NMR (400 MHz,  $\text{DMSO-}d_6$ ) of 4-(methoxycarbonyl)-1-(2-oxo-2-phenylethyl)pyridin-1-ium bromide (**5u**)

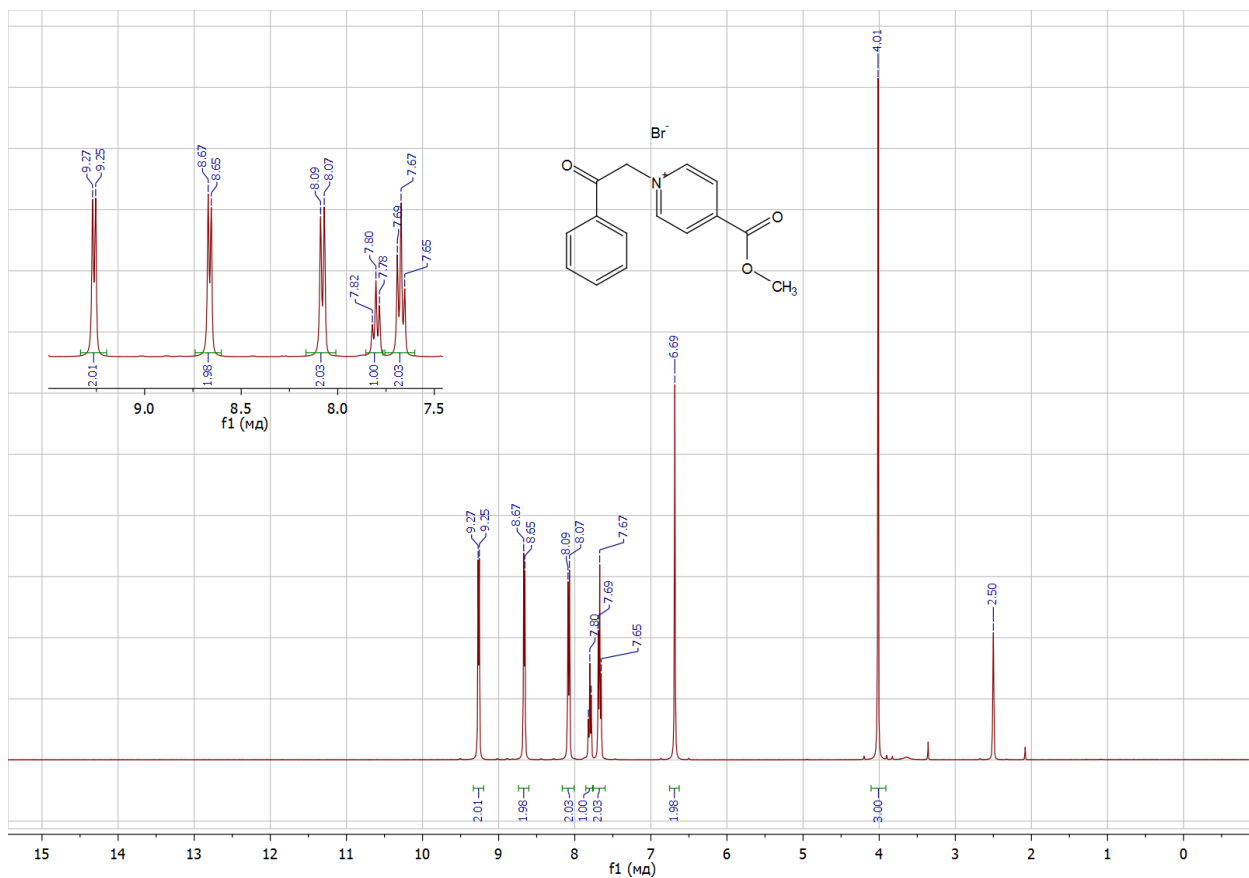

<sup>13</sup>C{<sup>1</sup>H} NMR (101 MHz, DMSO-*d*<sub>6</sub>) of 4-(methoxycarbonyl)-1-(2-oxo-2-phenylethyl)pyridin-1-ium bromide (**5u**)

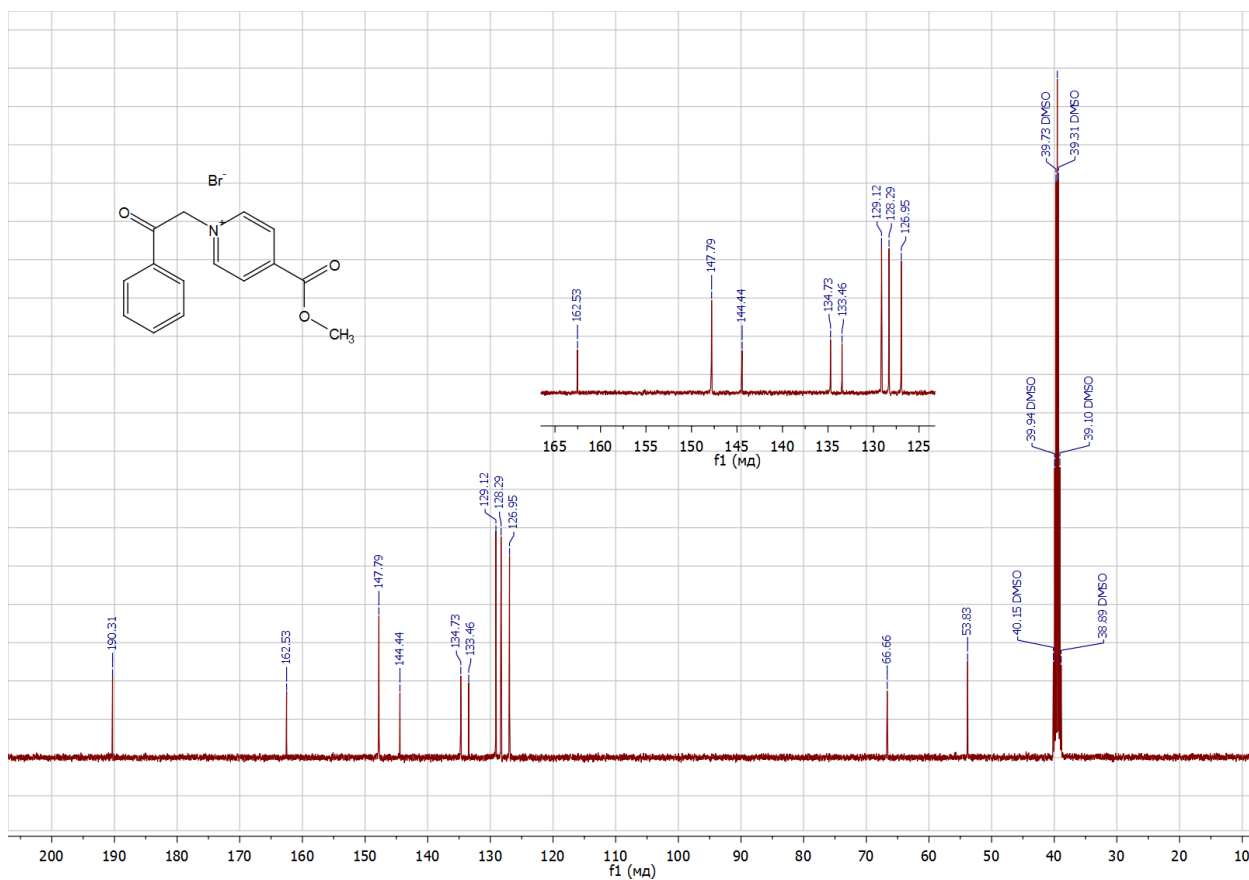

<sup>13</sup>C DEPT135 NMR (101 MHz, DMSO-*d*<sub>6</sub>) of 4-(methoxycarbonyl)-1-(2-oxo-2-phenylethyl)pyridin-1-ium bromide (**5u**)

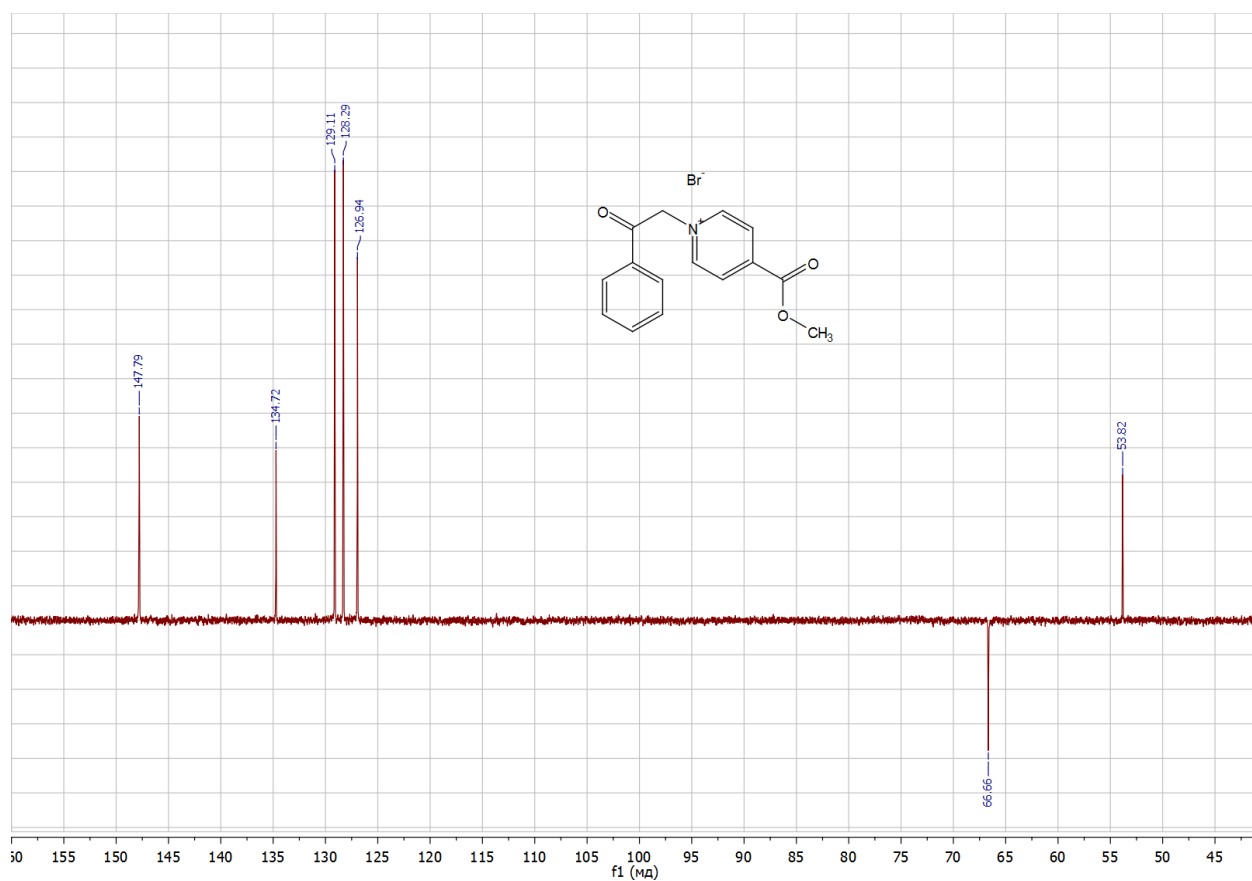

$^1\text{H}$  NMR (400 MHz,  $\text{DMSO-}d_6$ ) of 4-benzoyl-1-(2-oxo-2-phenylethyl)pyridin-1-ium bromide (**5w**)

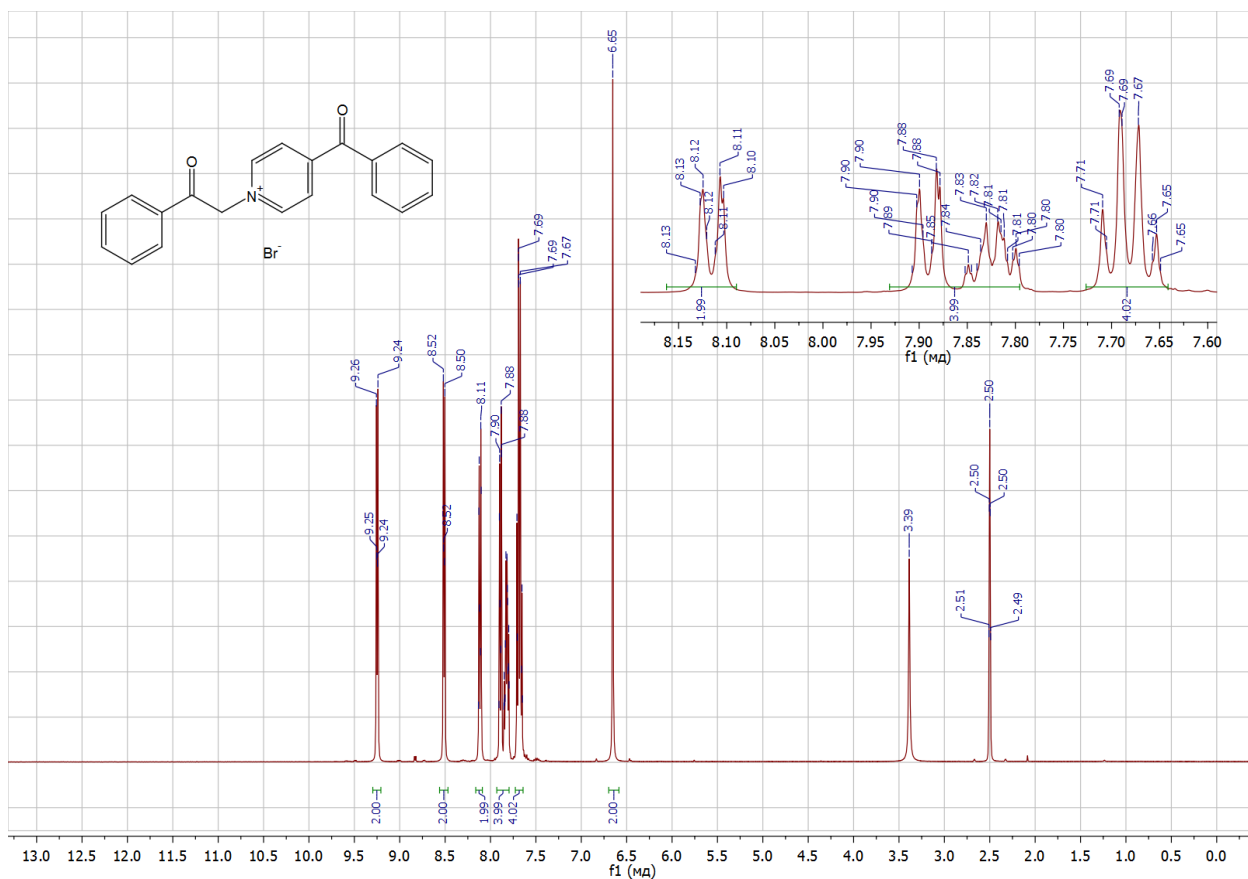

$^{13}\text{C}\{^1\text{H}\}$  NMR (101 MHz,  $\text{DMSO-}d_6$ ) of 4-benzoyl-1-(2-oxo-2-phenylethyl)pyridin-1-ium bromide (**5w**)

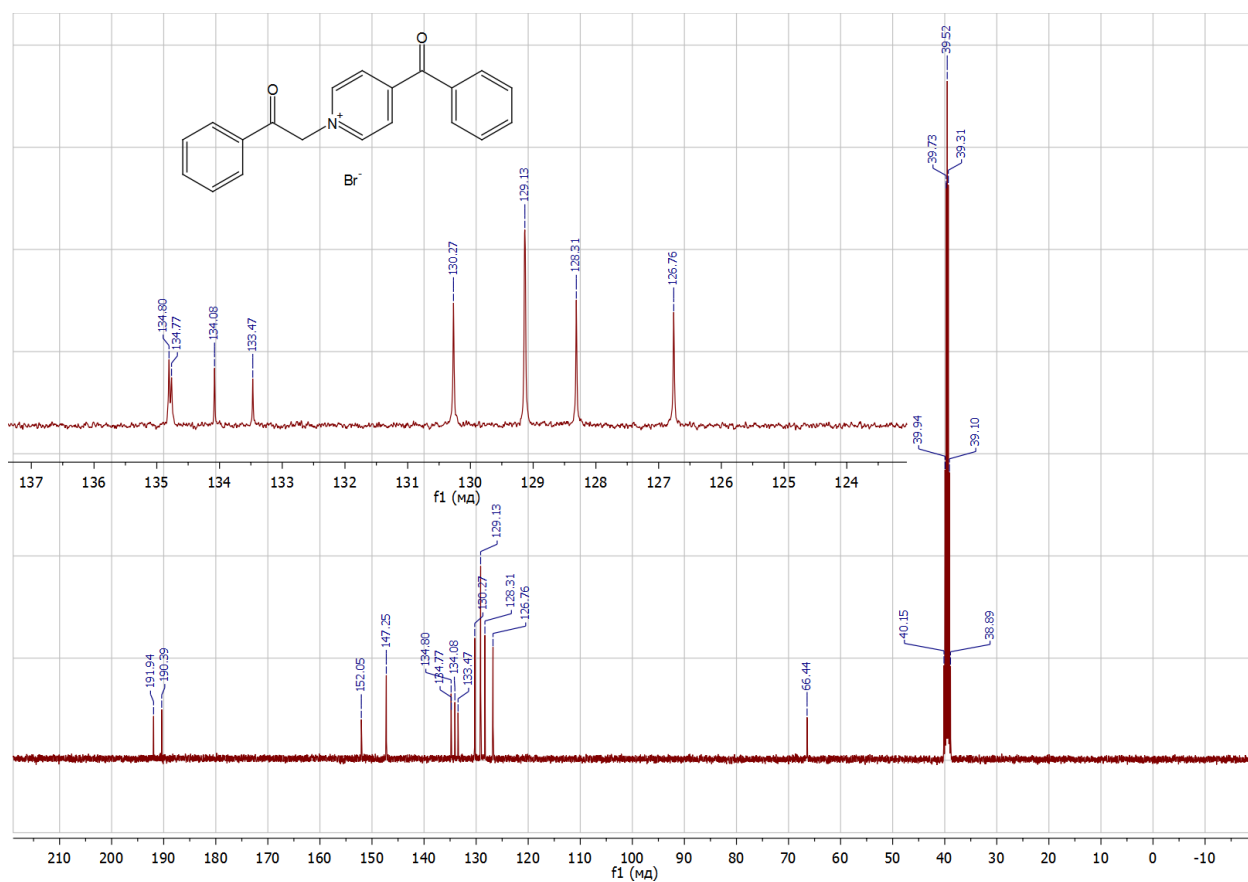

Chemical structure: c1ccccc1C(=O)CN2C=CC(=C(C2C(=O)c3ccccc3))=[N+]([Br-])

<sup>13</sup>C NMR peaks (ppm):

| Peak Label | Chemical Shift (ppm) |
|------------|----------------------|
| 147.26     | 147.26               |
| 134.81     | 134.81               |
| 134.77     | 134.77               |
| 130.27     | 130.27               |
| 129.14     | 129.14               |
| 128.31     | 128.31               |
| 126.76     | 126.76               |
| 124.81     | 124.81               |
| 124.77     | 124.77               |
| 66.44      | 66.44                |
| 30.27      | 30.27                |
| 29.14      | 29.14                |

$^1\text{H}$  NMR (400 MHz,  $\text{DMSO}-d_6$ ) of 3-phenylpyrido[2,1-*a*]pyrrolo[3,4-*c*]isoquinoline (**6a**)

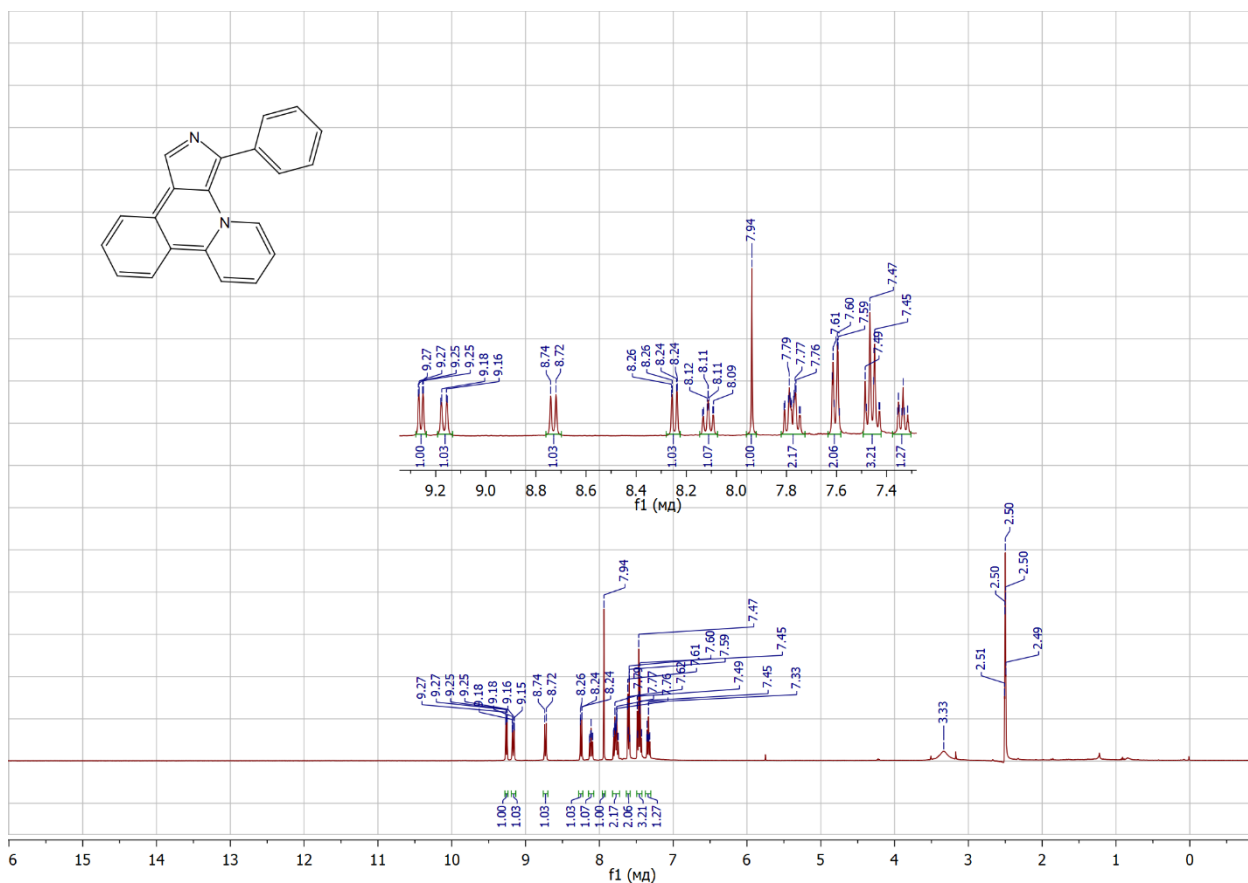

$^{13}\text{C}\{^1\text{H}\}$  NMR (101 MHz,  $\text{DMSO}-d_6$ ) of 3-phenylpyrido[2,1-*a*]pyrrolo[3,4-*c*]isoquinoline (**6a**)

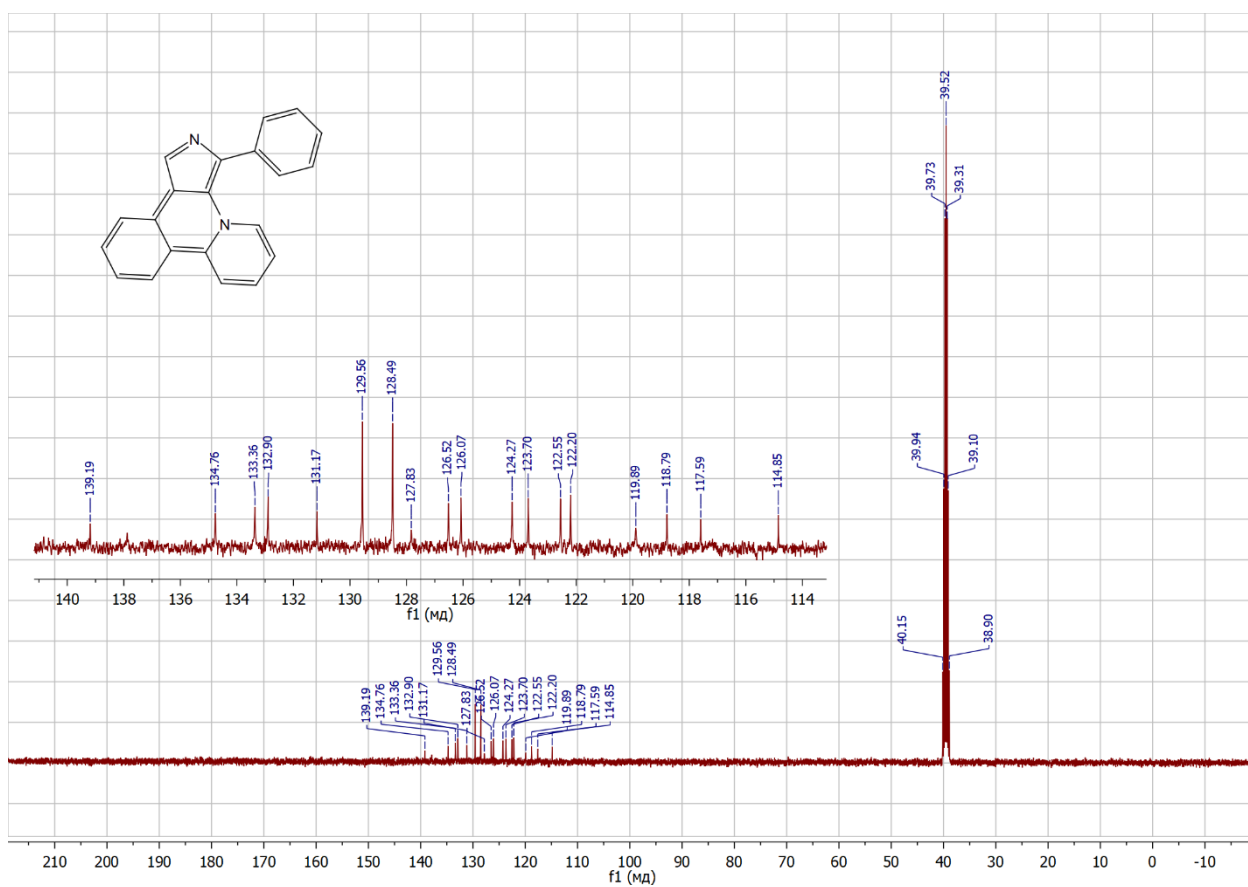

$^{13}\text{C}$  DEPT135 NMR (101 MHz,  $\text{DMSO}-d_6$ ) of 3-phenylpyrido[2,1-*a*]pyrrolo[3,4-*c*]isoquinoline (**6a**)

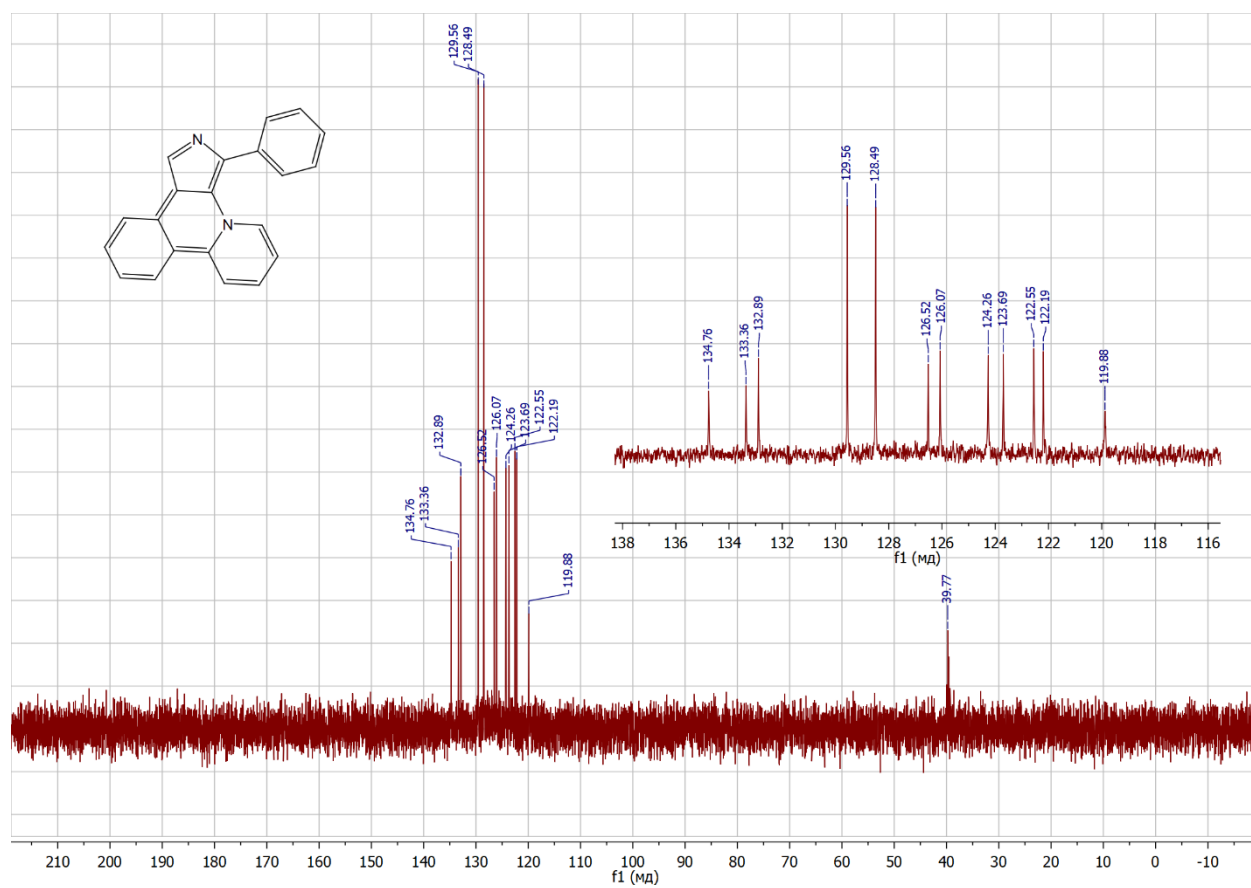



$^1\text{H}$  NMR (400 MHz,  $\text{DMSO-}d_6$ ) of 3-(4-chlorophenyl)pyrido[2,1-*a*]pyrrolo[3,4-*c*]isoquinoline (**6c**)

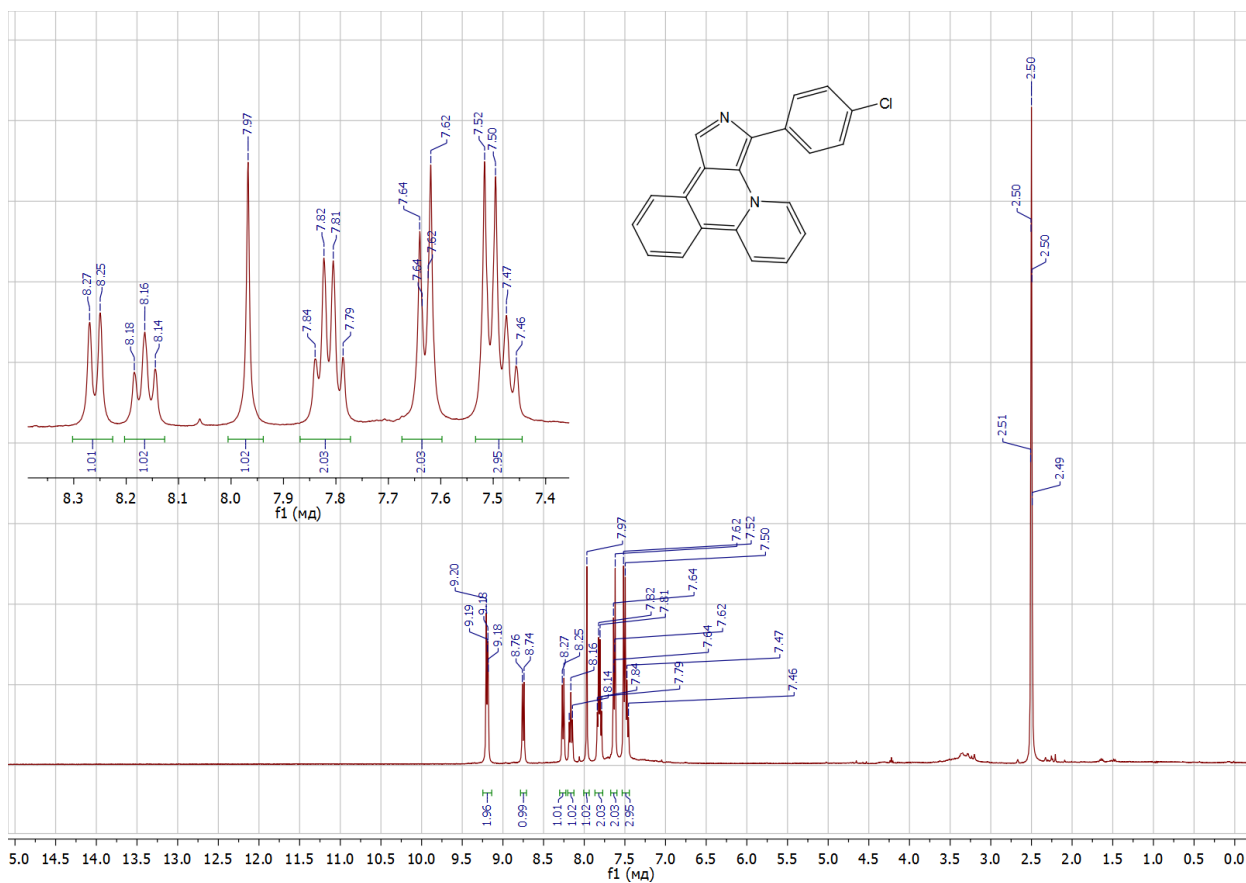

$^{13}\text{C}\{^1\text{H}\}$  NMR (101 MHz,  $\text{DMSO-}d_6$ ) of 3-(4-chlorophenyl)pyrido[2,1-*a*]pyrrolo[3,4-*c*]isoquinoline (**6c**)

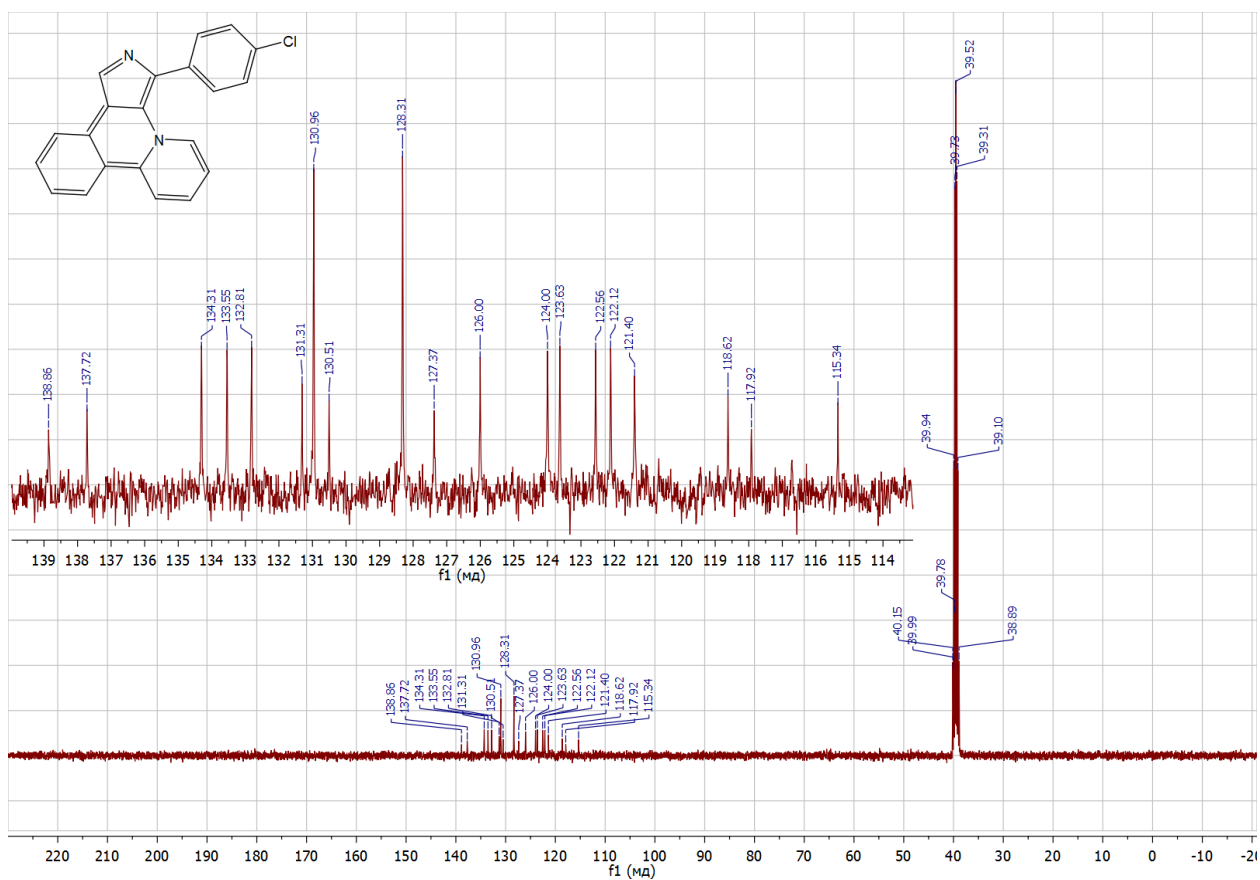

$^{13}\text{C}$  DEPT135 NMR (101 MHz,  $\text{DMSO}-d_6$ ) of 3-(4-chlorophenyl)pyrido[2,1-*a*]pyrrolo[3,4-*c*]isoquinoline (**6c**)

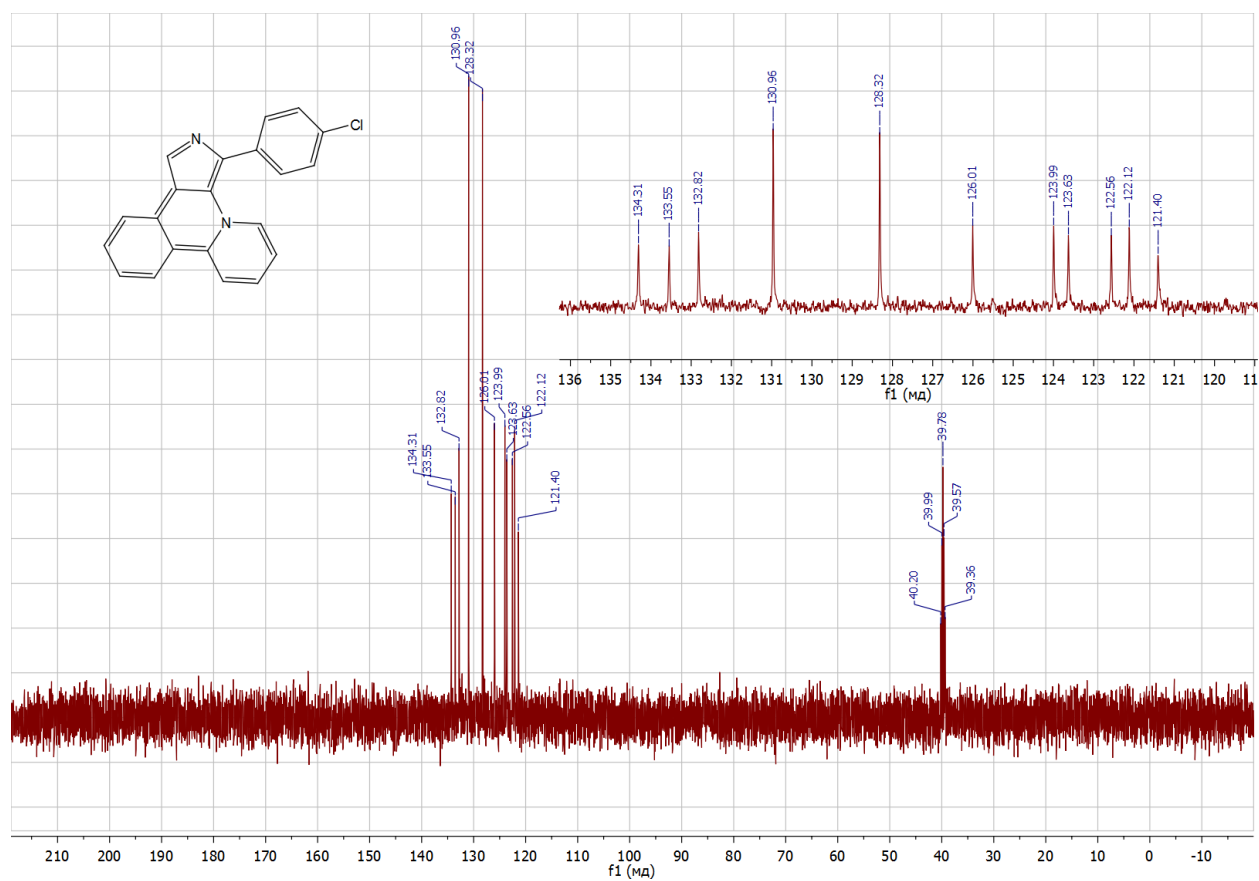

$^1\text{H}$  NMR (400 MHz,  $\text{DMSO}-d_6$ ) of 3-(3-methyl)pyrido[2,1-*a*]pyrrolo[3,4-*c*]isoquinoline (**6e**)

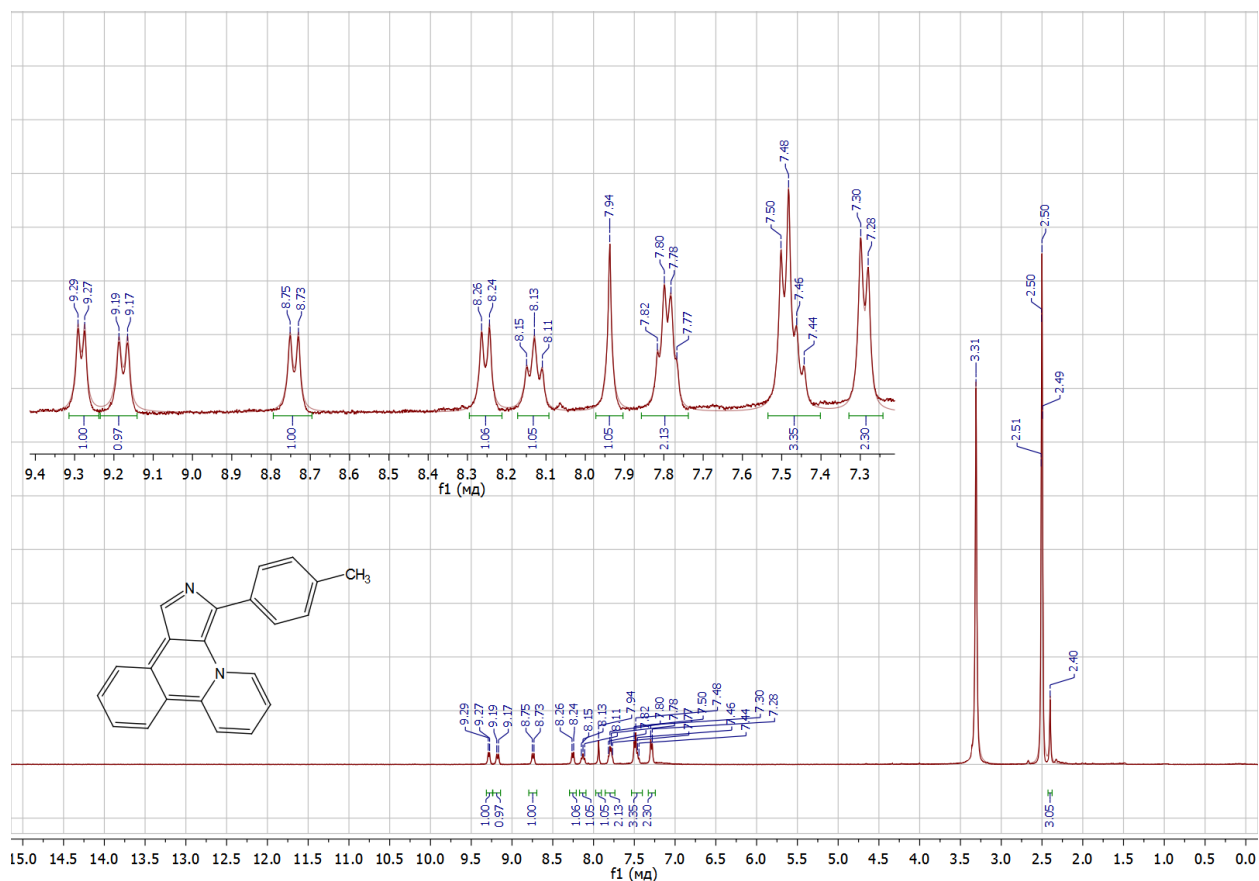

$^{13}\text{C}\{^1\text{H}\}$  NMR (101 MHz,  $\text{DMSO}-d_6$ ) of 3-(3-methyl)pyrido[2,1-*a*]pyrrolo[3,4-*c*]isoquinoline (**6e**)

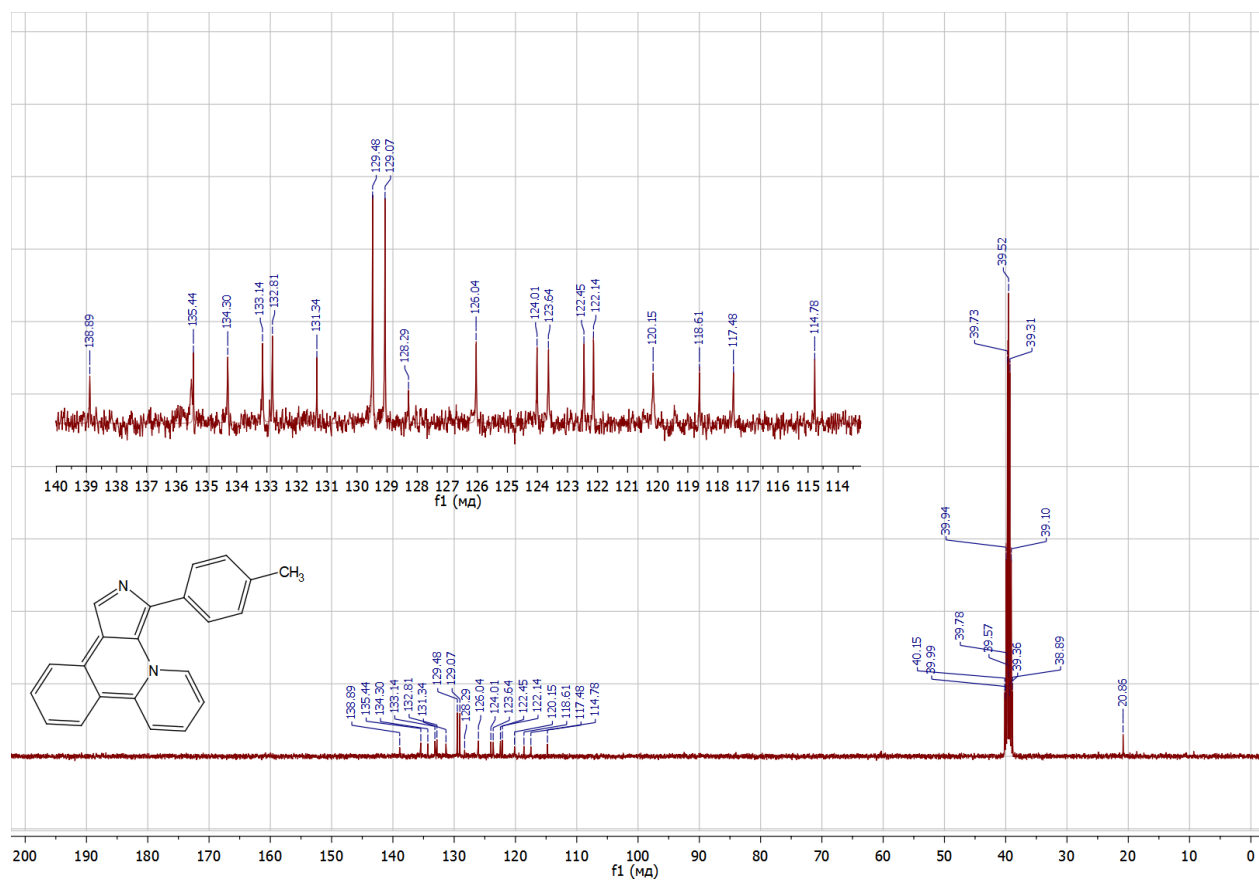

$^{13}\text{C}$  DEPT135 NMR (101 MHz,  $\text{DMSO-}d_6$ ) of 3-(3-methyl)pyrido[2,1-*a*]pyrrolo[3,4-*c*]isoquinoline (**6e**)

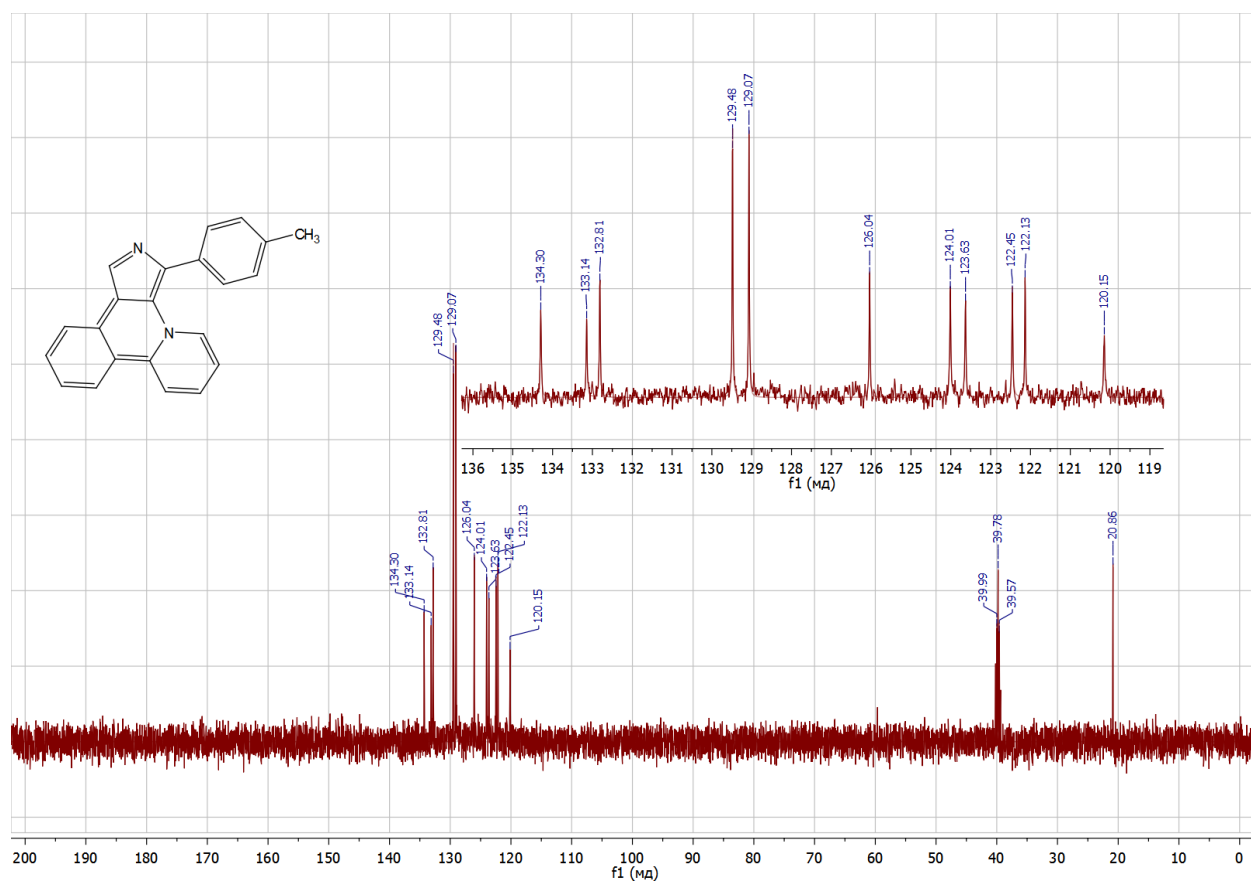

<sup>1</sup>H NMR (400 MHz, DMSO-*d*<sub>6</sub>) of 3-(4-methoxyphenyl)pyrido[2,1-*a*]pyrrolo[3,4-*c*]isoquinoline (**6f**)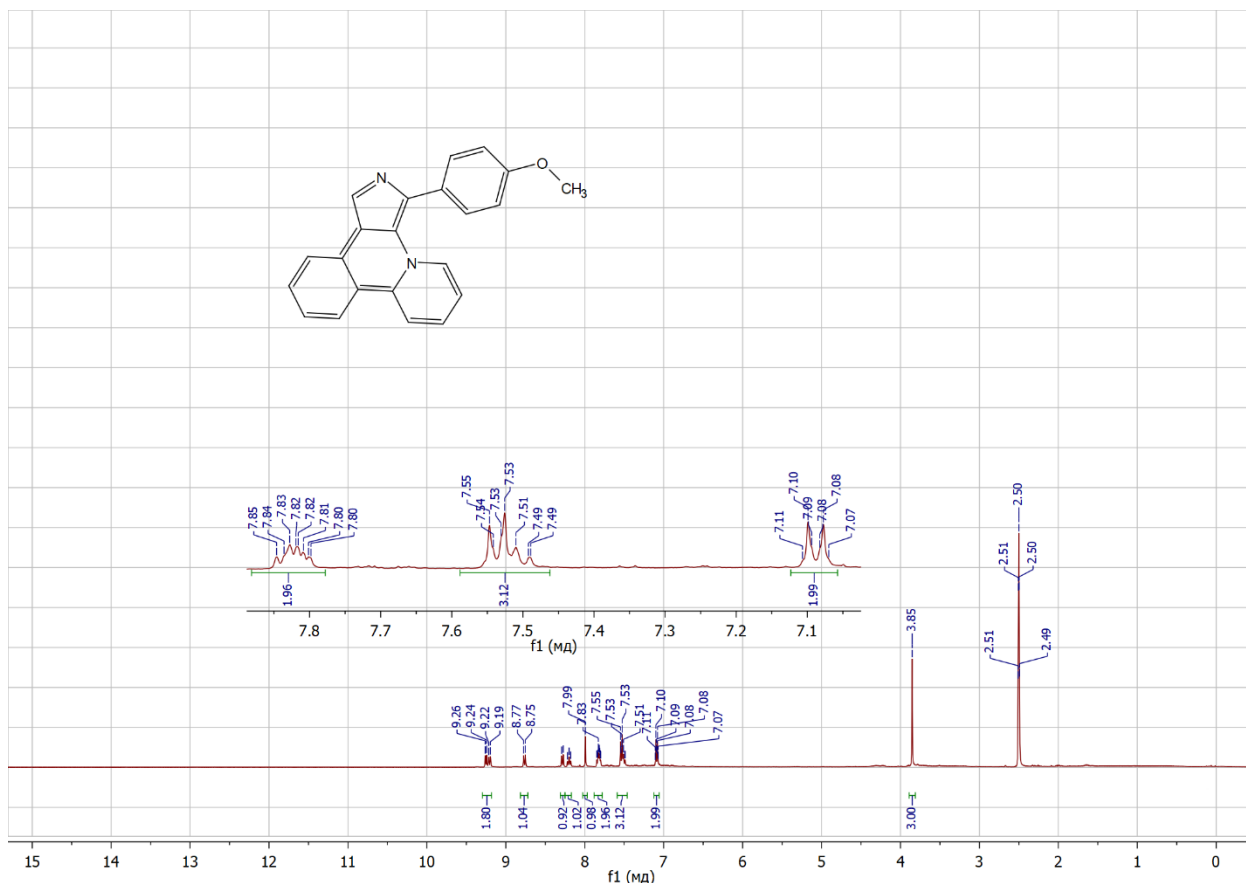<sup>13</sup>C{<sup>1</sup>H} NMR (101 MHz, DMSO-*d*<sub>6</sub>) of 3-(4-methoxyphenyl)pyrido[2,1-*a*]pyrrolo[3,4-*c*]isoquinoline (**6f**)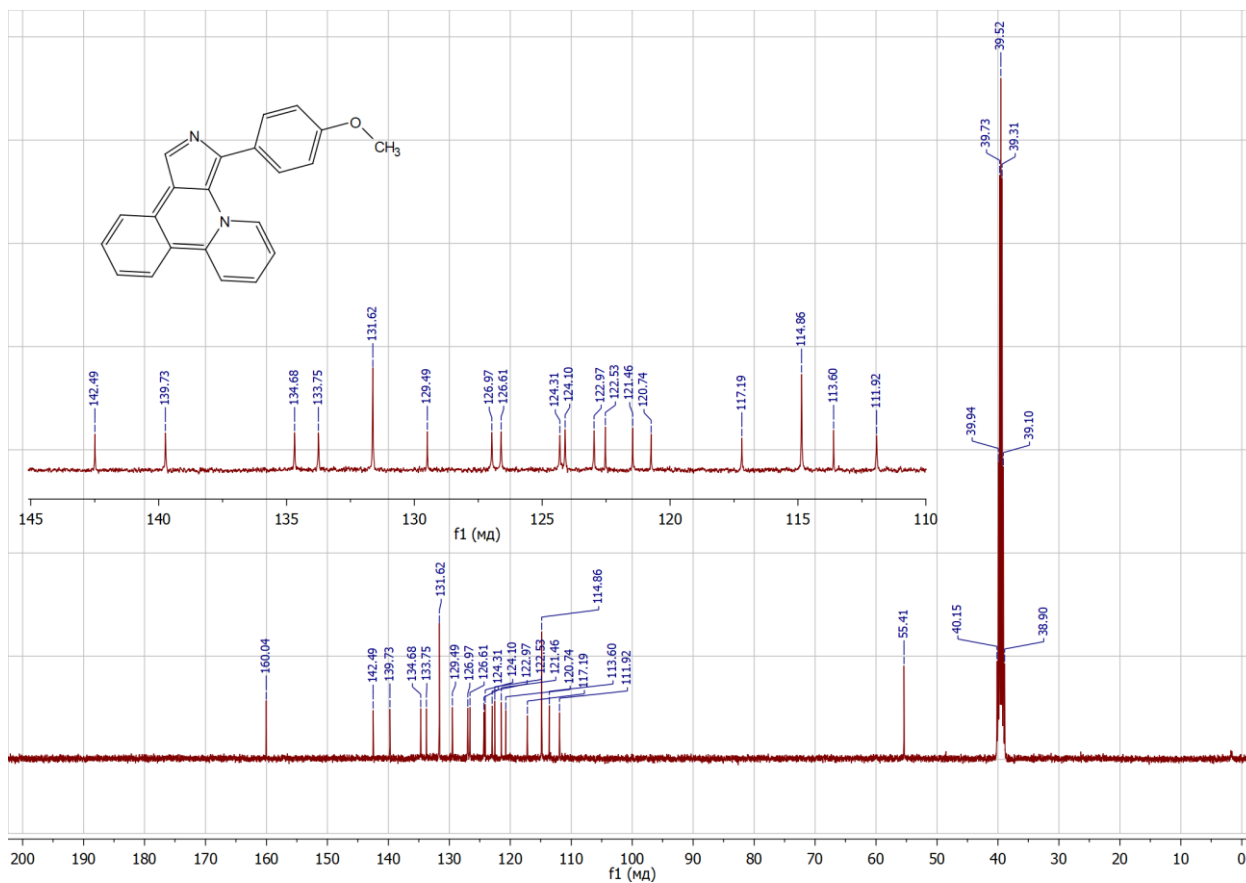

$^{13}\text{C}$  DEPT135 NMR (101 MHz,  $\text{DMSO-}d_6$ ) of 3-(4-methoxyphenyl)pyrido[2,1-*a*]pyrrolo[3,4-*c*]isoquinoline (**6f**)

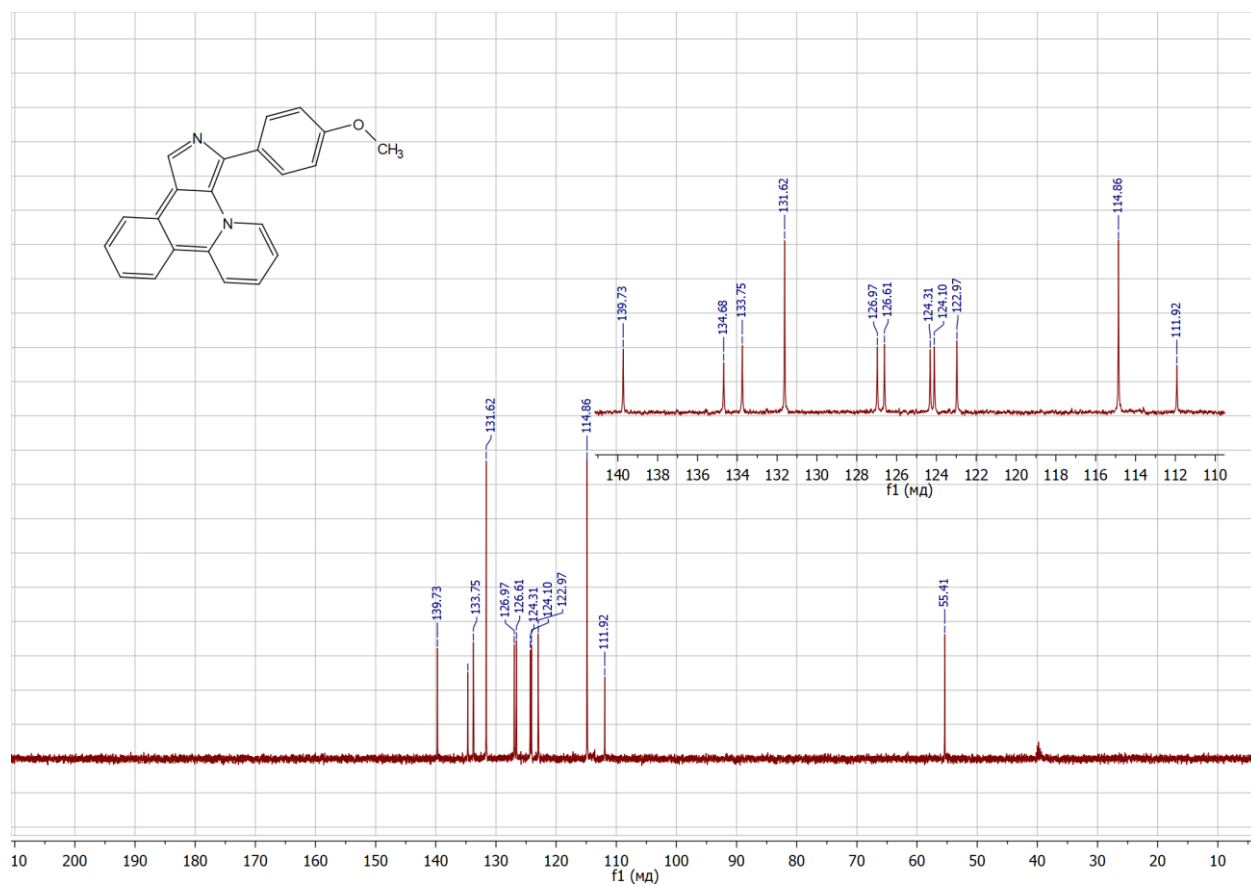

$^1\text{H}$  NMR (400 MHz,  $\text{DMSO-}d_6$ ) of 3-(2-methoxyphenyl)pyrido[2,1-*a*]pyrrolo[3,4-*c*]isoquinoline (**6g**)

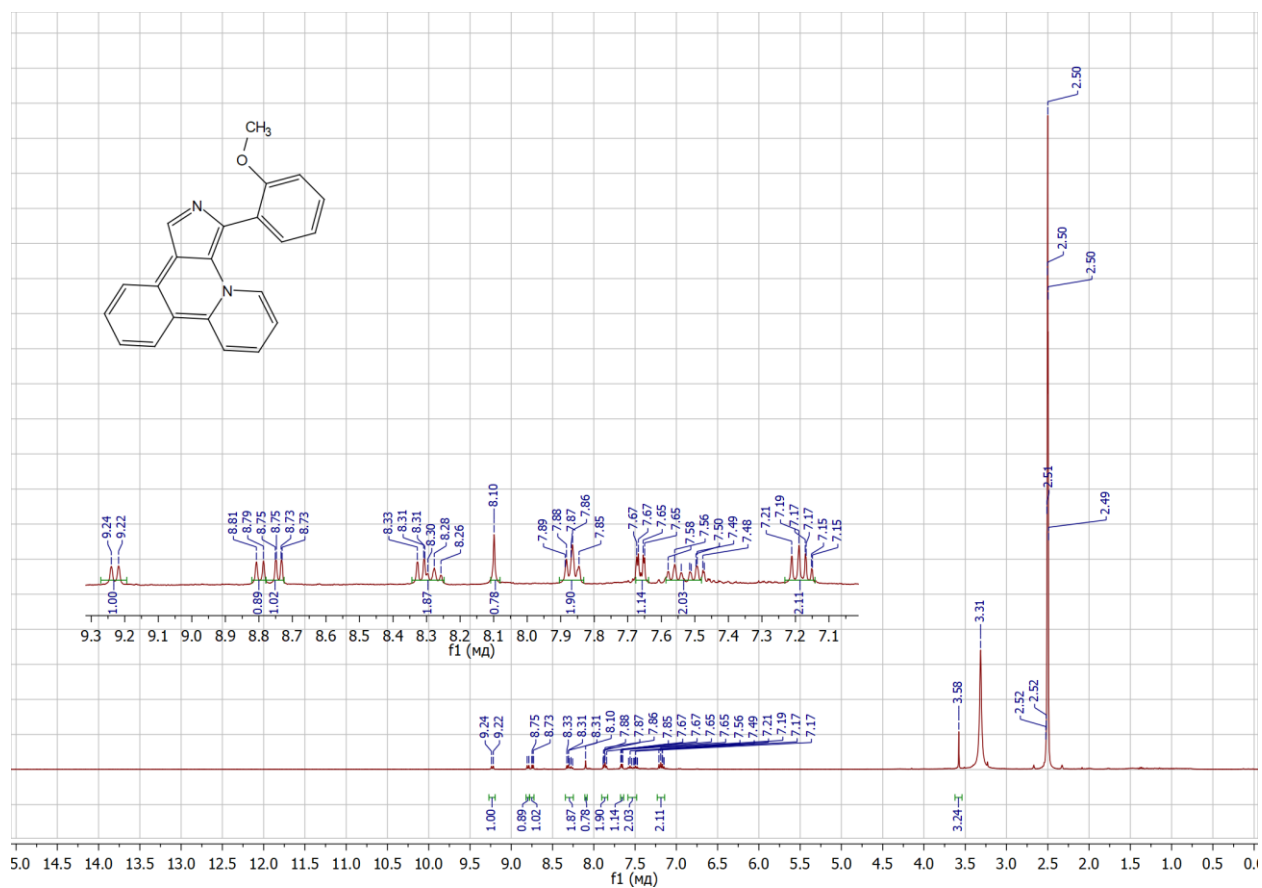

$^{13}\text{C}\{^1\text{H}\}$  NMR (101 MHz,  $\text{DMSO-}d_6$ ) of 3-(2-methoxyphenyl)pyrido[2,1-*a*]pyrrolo[3,4-*c*]isoquinoline (**6g**)

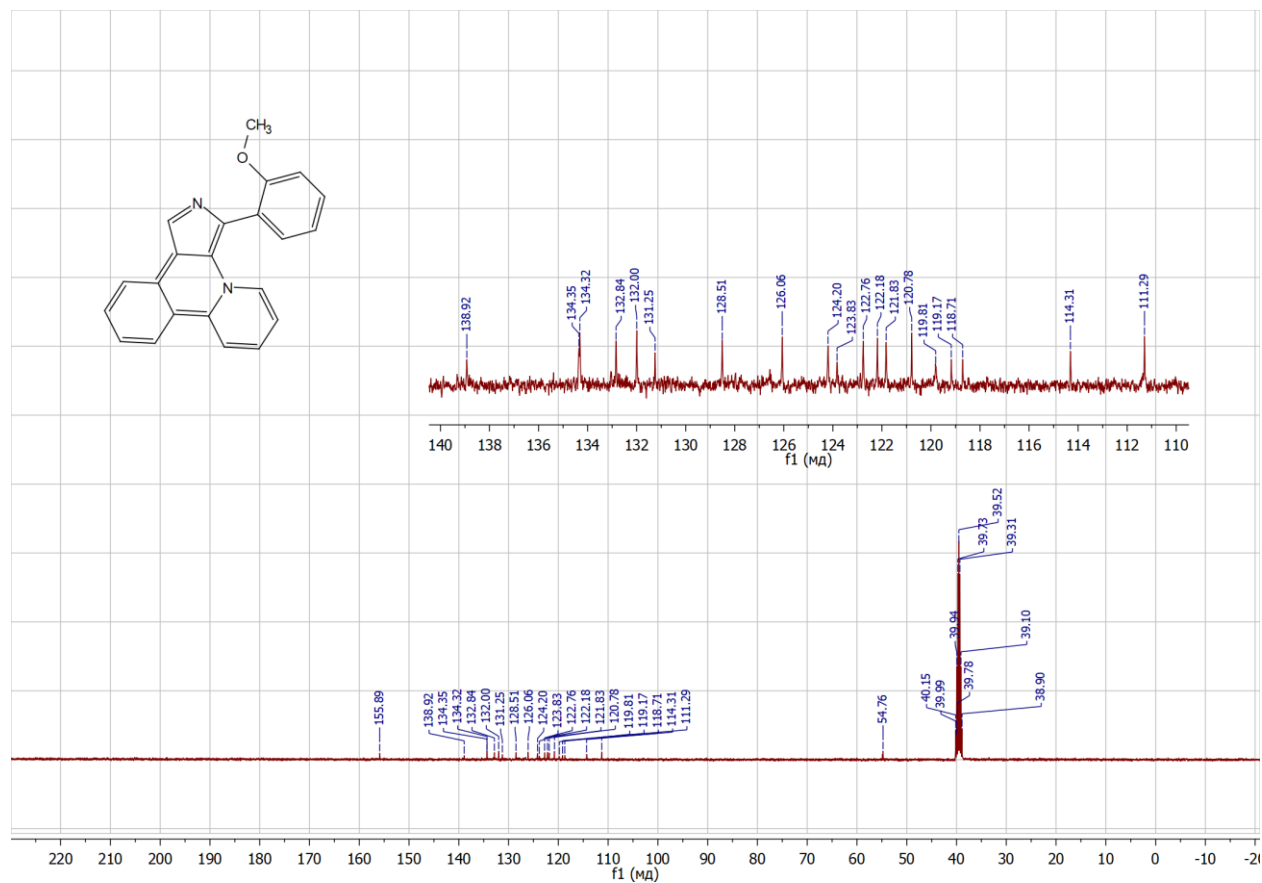

$^{13}\text{C}$  DEPT135 NMR (101 MHz,  $\text{DMSO-}d_6$ ) of 3-(2-methoxyphenyl)pyrido[2,1-*a*]pyrrolo[3,4-*c*]isoquinoline (**6g**)

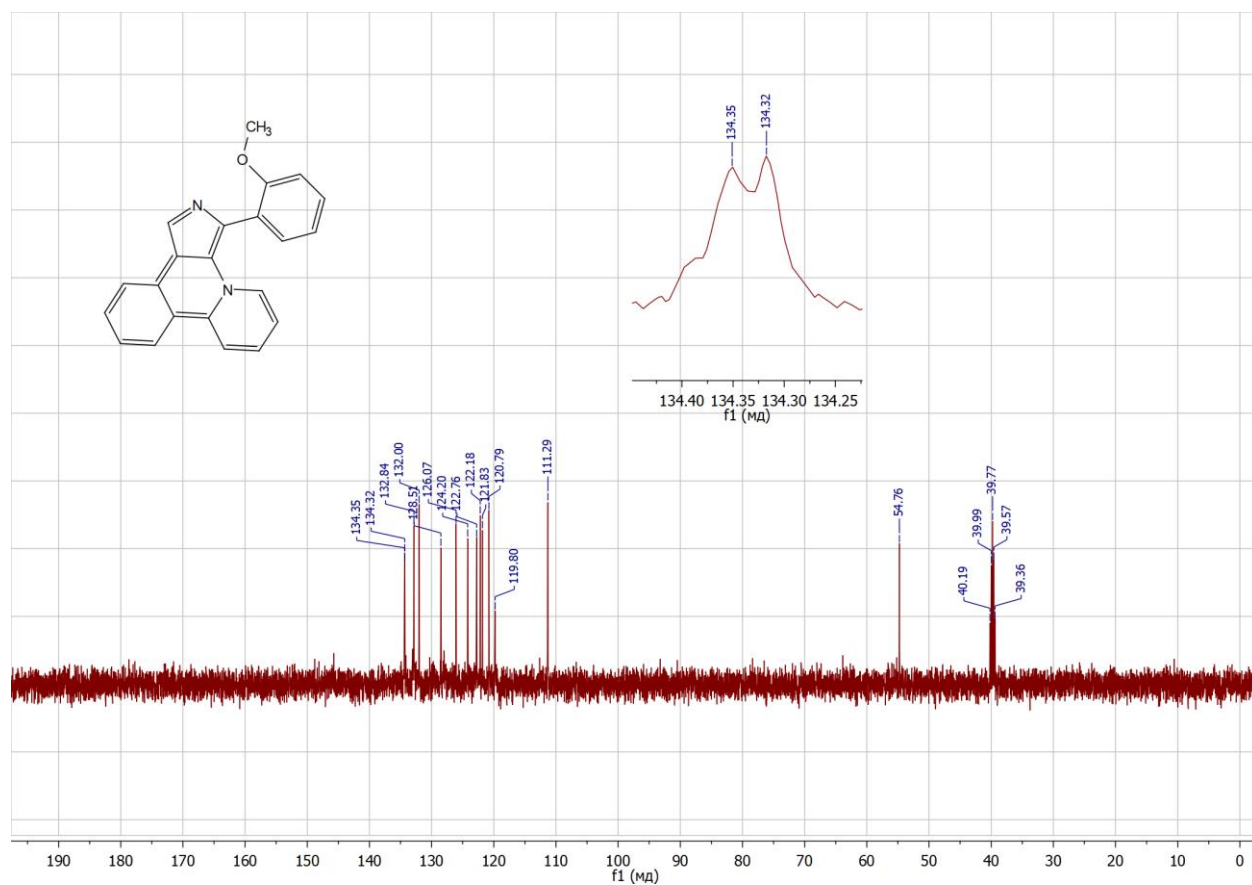



$^1\text{H}$  NMR (400 MHz,  $\text{DMSO}-d_6$ ) of 3-(3-methoxyphenyl)pyrido[2,1-*a*]pyrrolo[3,4-*c*]isoquinoline (**6h**)

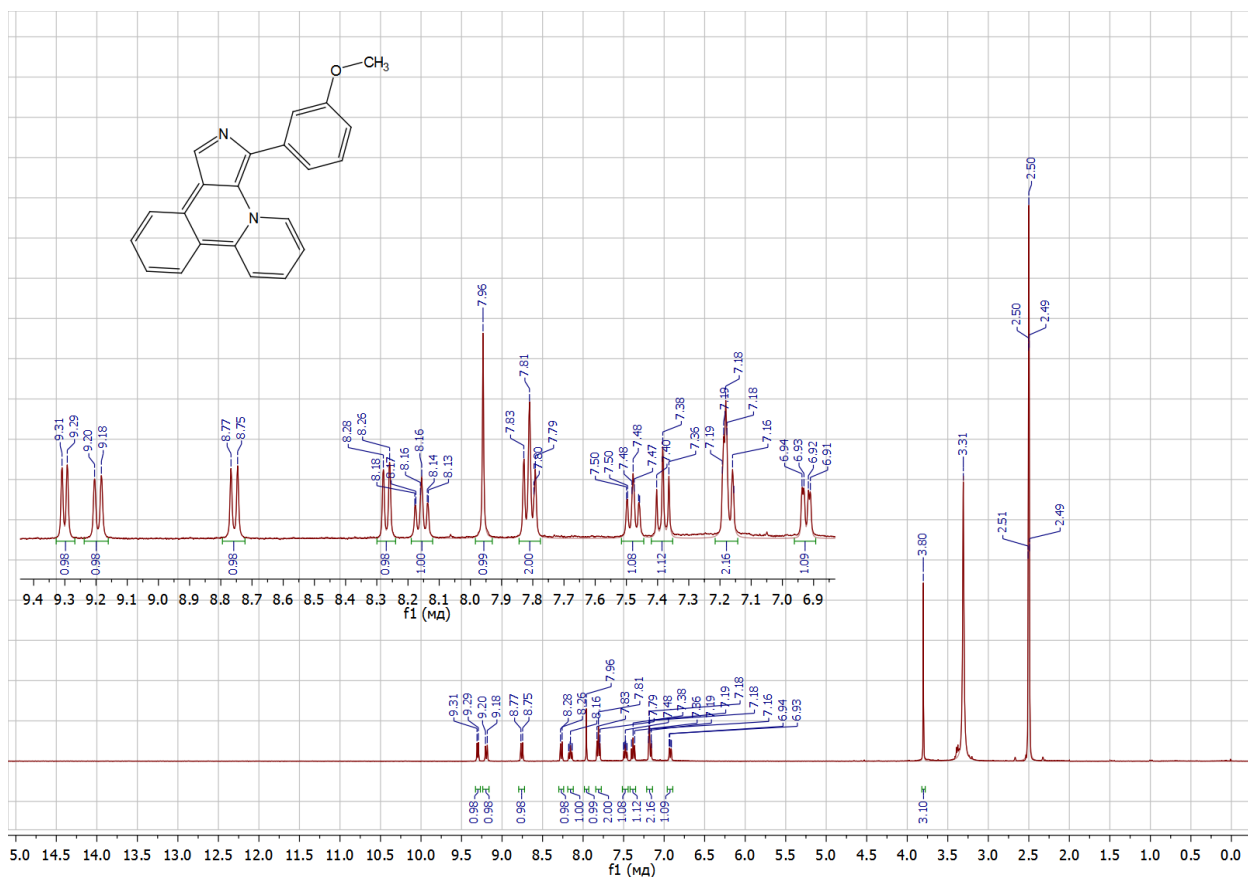

$^{13}\text{C}\{^1\text{H}\}$  NMR (101 MHz,  $\text{DMSO}-d_6$ ) of 3-(3-methoxyphenyl)pyrido[2,1-*a*]pyrrolo[3,4-*c*]isoquinoline (**6h**)

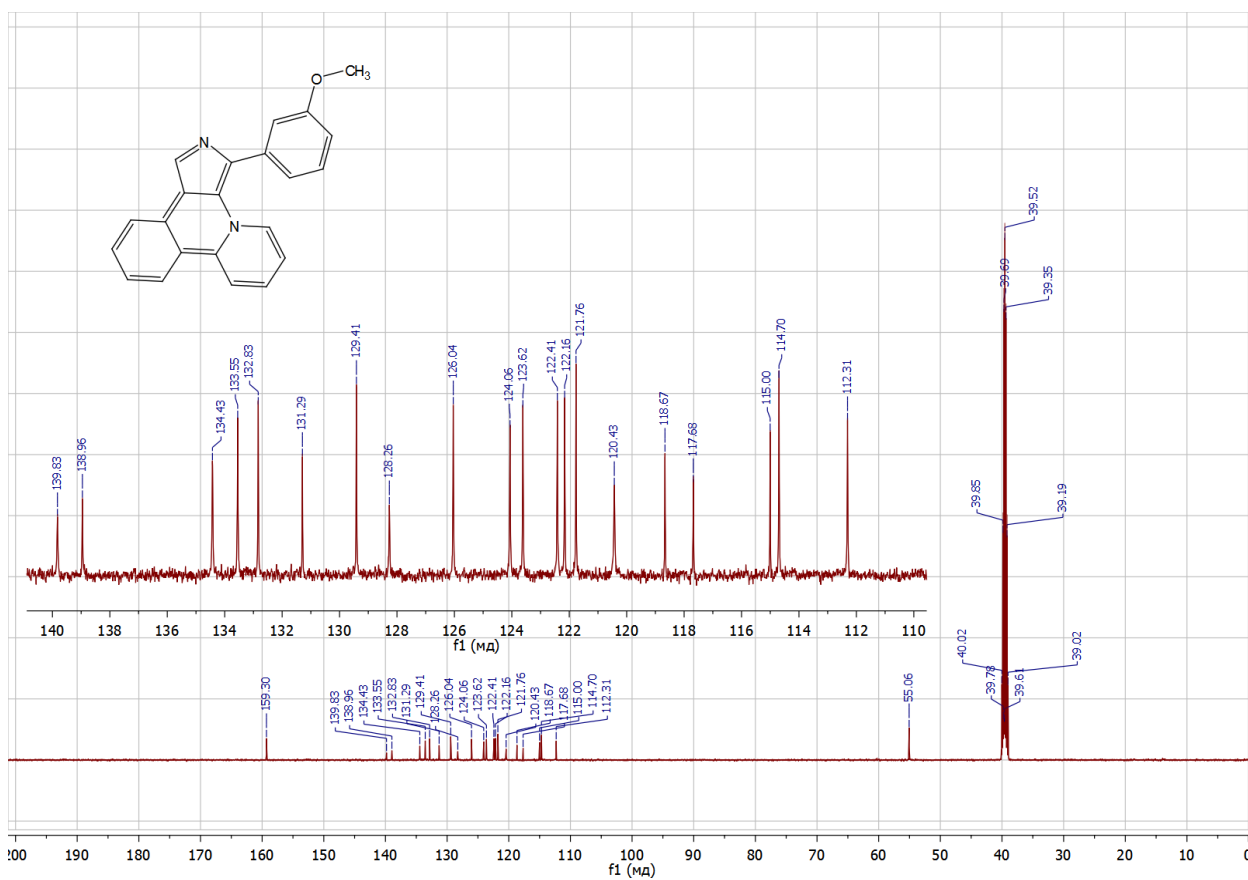

$^{13}\text{C}$  DEPT135 NMR (101 MHz,  $\text{DMSO}-d_6$ ) of 3-(3-methoxyphenyl)pyrido[2,1-*a*]pyrrolo[3,4-*c*]isoquinoline (**6h**)

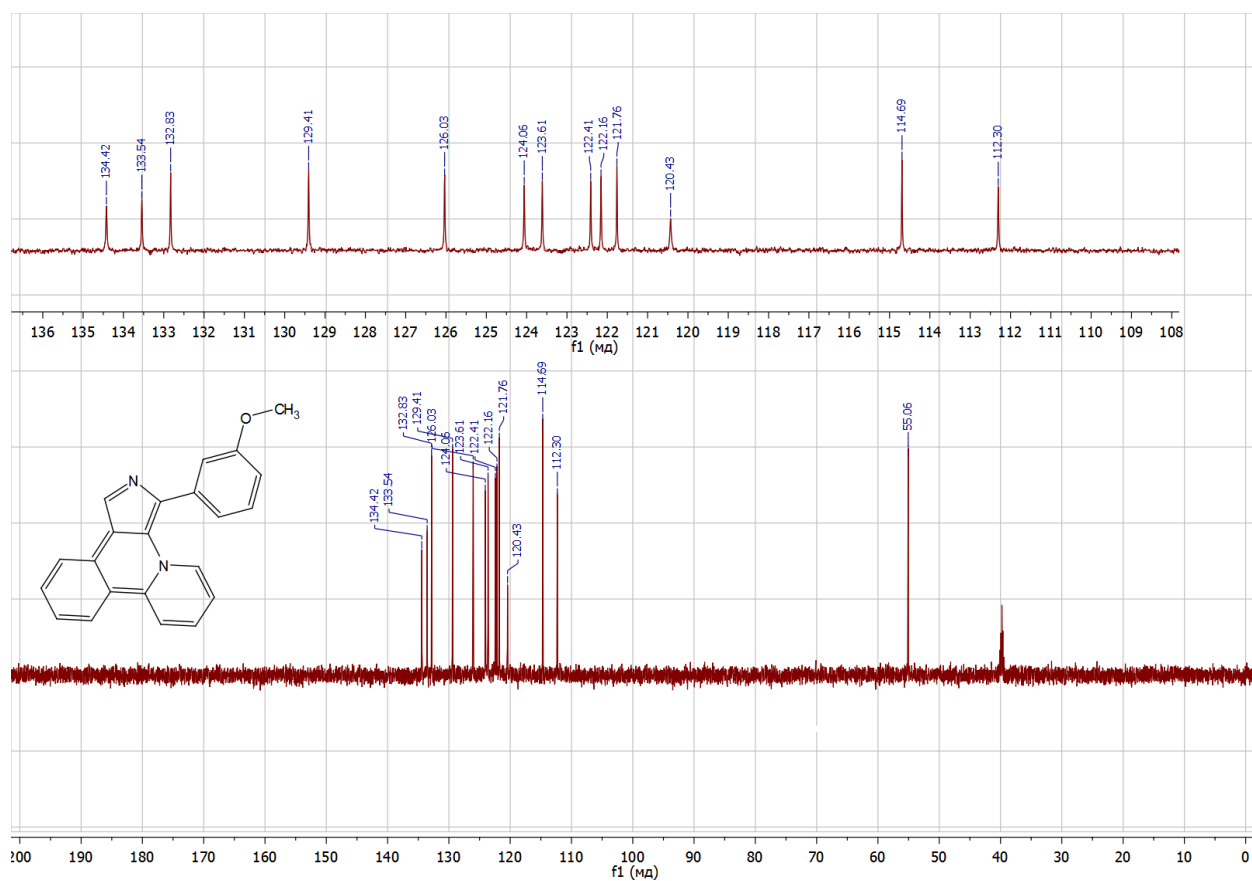

$^1\text{H}$  NMR (400 MHz,  $\text{DMSO-}d_6$ ) of 3-(2,4-dimethoxyphenyl)pyrido[2,1-*a*]pyrrolo[3,4-*c*]isoquinoline (**6i**)

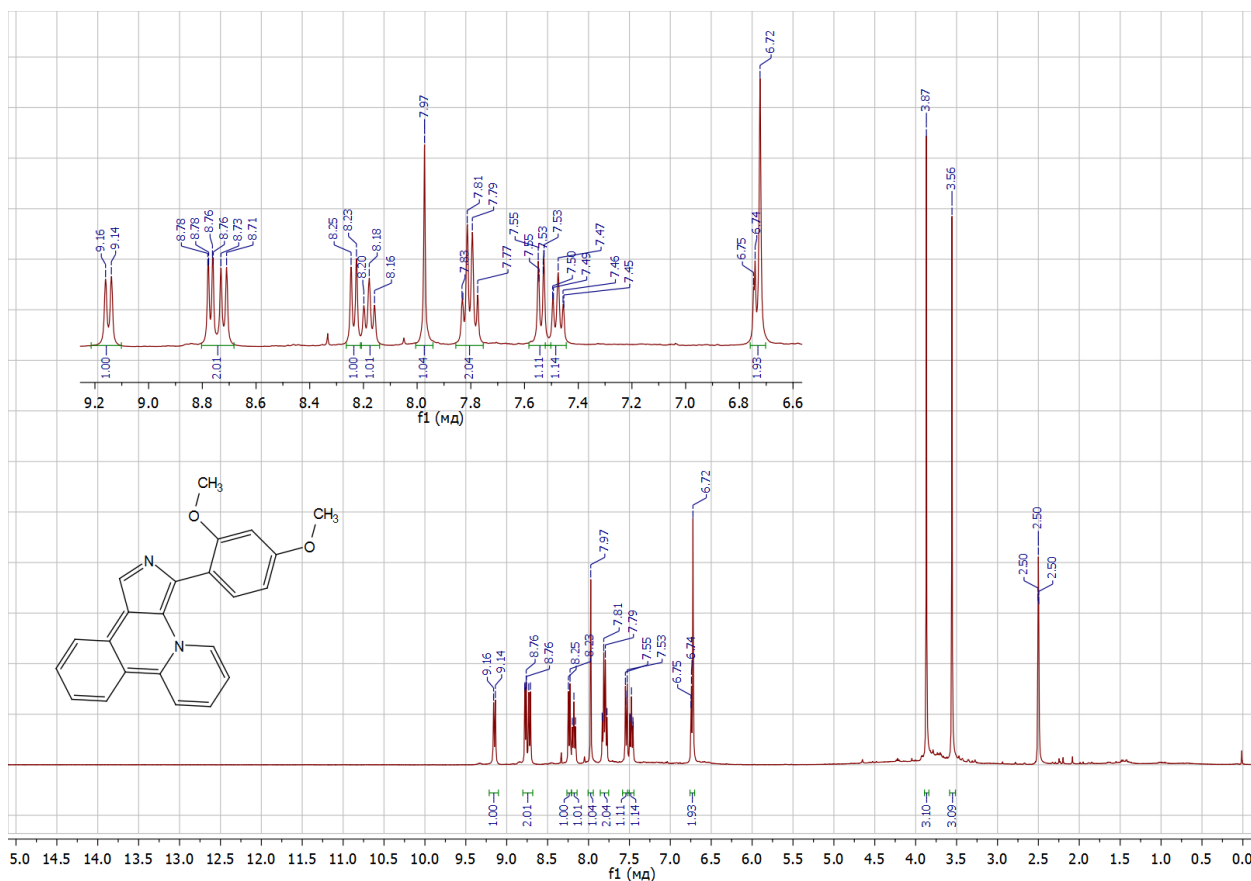

$^{13}\text{C}\{^1\text{H}\}$  NMR (101 MHz,  $\text{DMSO-}d_6$ ) of 3-(2,4-dimethoxyphenyl)pyrido[2,1-*a*]pyrrolo[3,4-*c*]isoquinoline (**6i**)

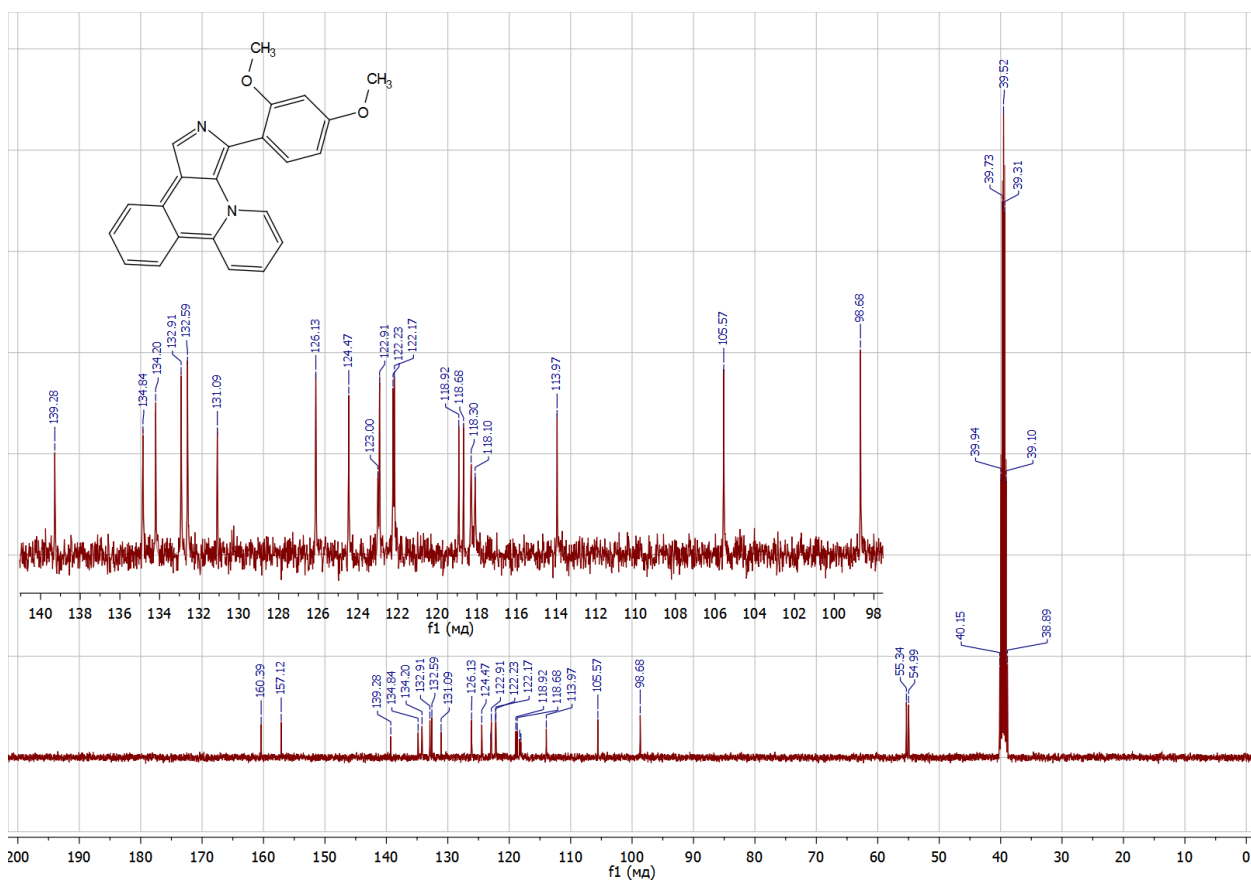

$^{13}\text{C}$  DEPT135 NMR (101 MHz,  $\text{DMSO-}d_6$ ) of 3-(2,4-dimethoxyphenyl)pyrido[2,1-*a*]pyrrolo[3,4-*c*]isoquinoline (**61**)

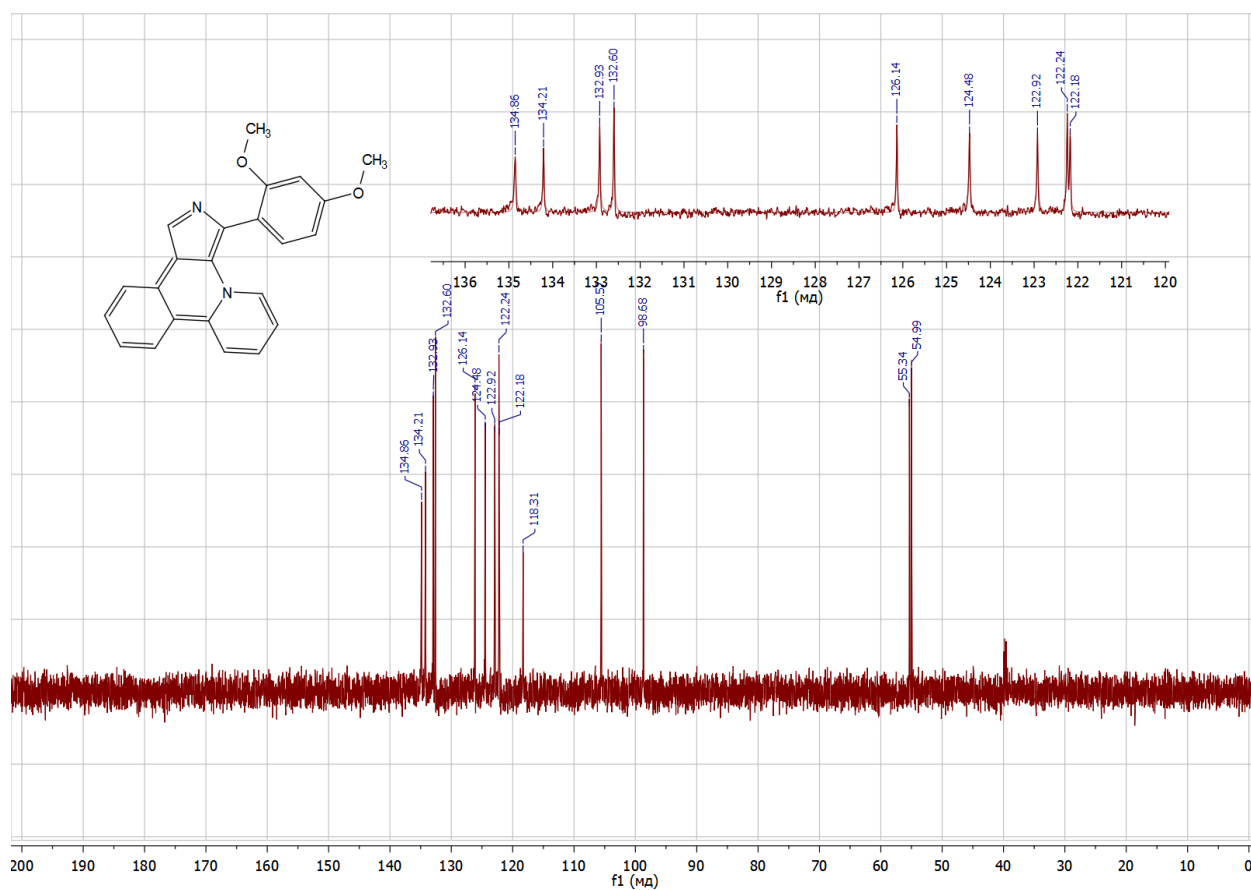

$^1\text{H}$  NMR (400 MHz,  $\text{DMSO}-d_6$ ) of 4-(pyrido[2,1-*a*]pyrrolo[3,4-*c*]isoquinolin-3-yl)benzonitrile (**6l**)

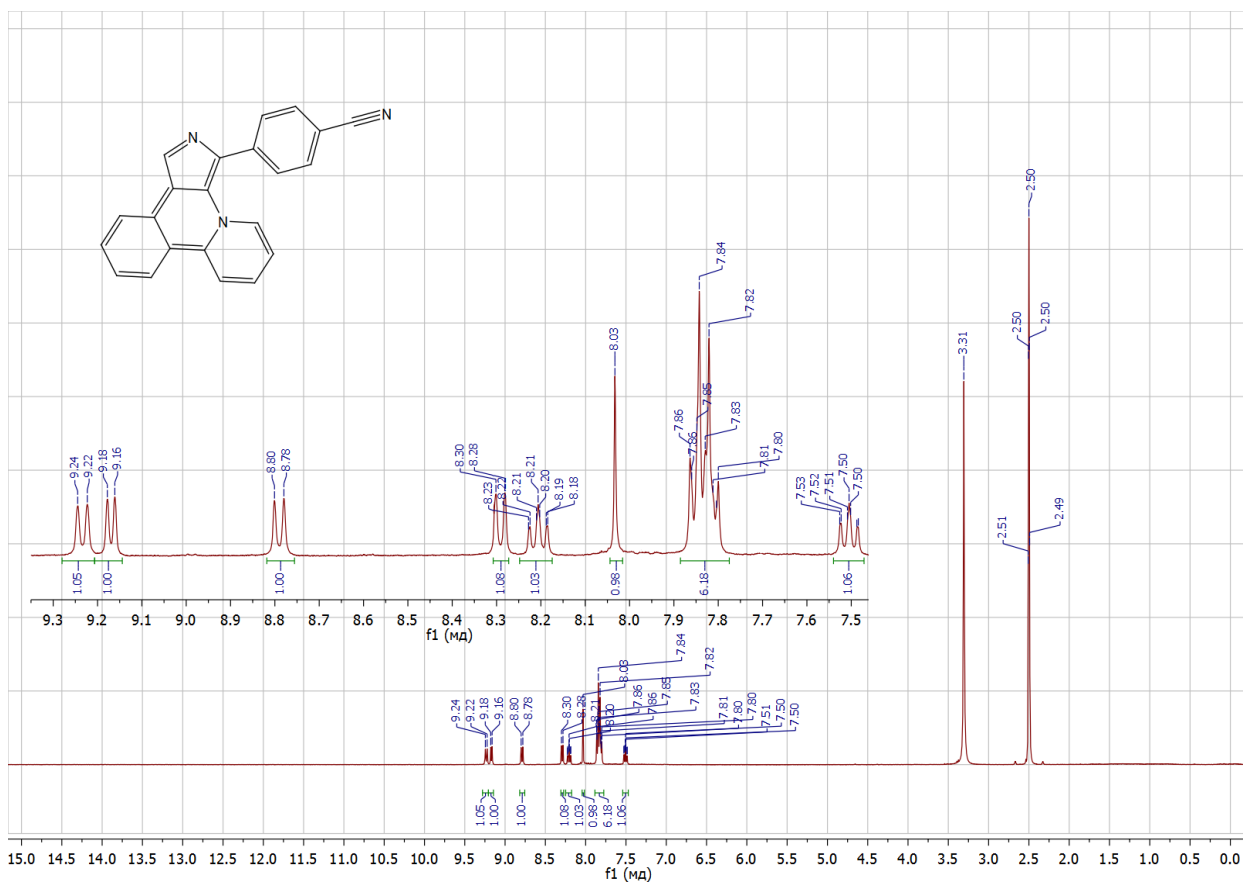

$^{13}\text{C}\{^1\text{H}\}$  NMR (101 MHz,  $\text{DMSO}-d_6$ ) of 4-(pyrido[2,1-*a*]pyrrolo[3,4-*c*]isoquinolin-3-yl)benzonitrile (**6l**)

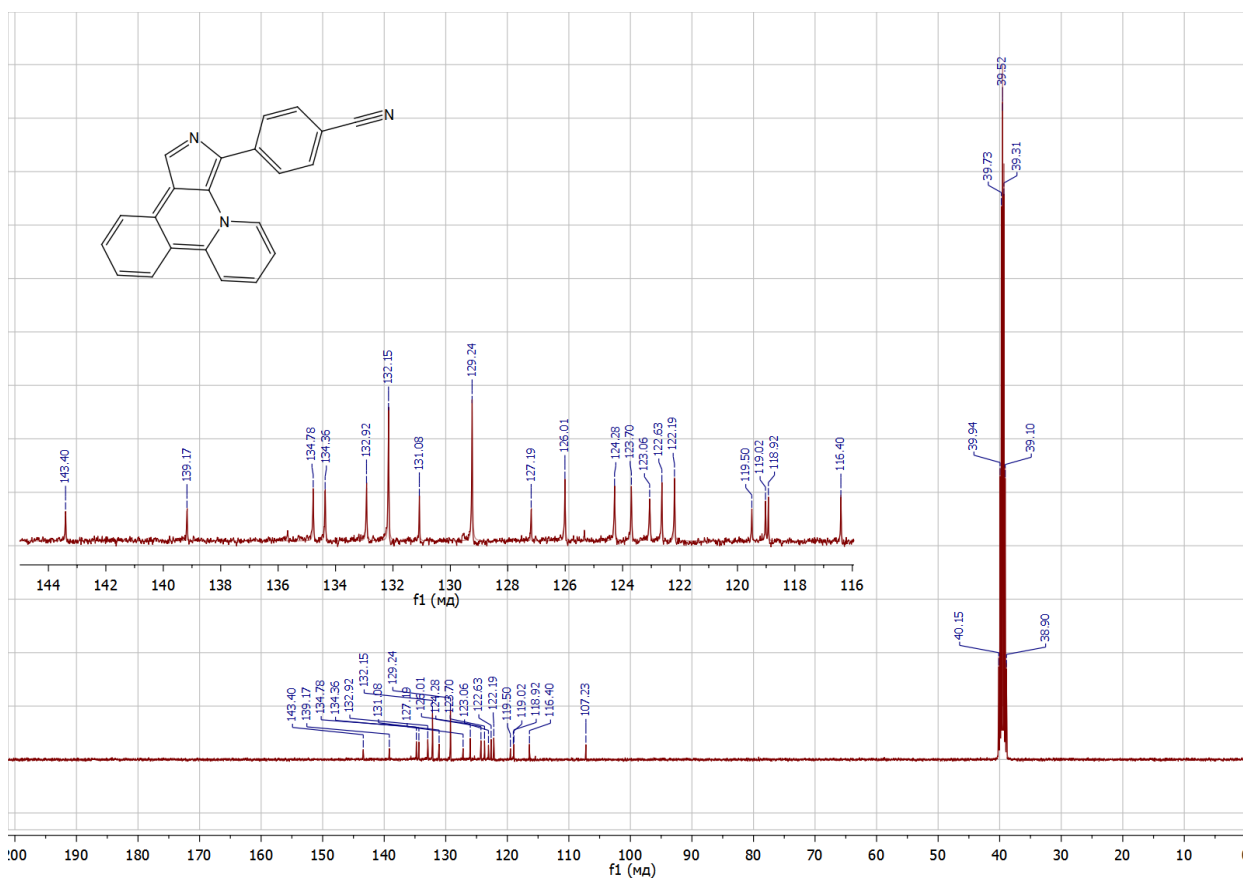

$^{13}\text{C}$  DEPT135 NMR (101 MHz,  $\text{DMSO-}d_6$ ) of 4-(pyrido[2,1-*a*]pyrrolo[3,4-*c*]isoquinolin-3-yl)benzonitrile (**6l**)

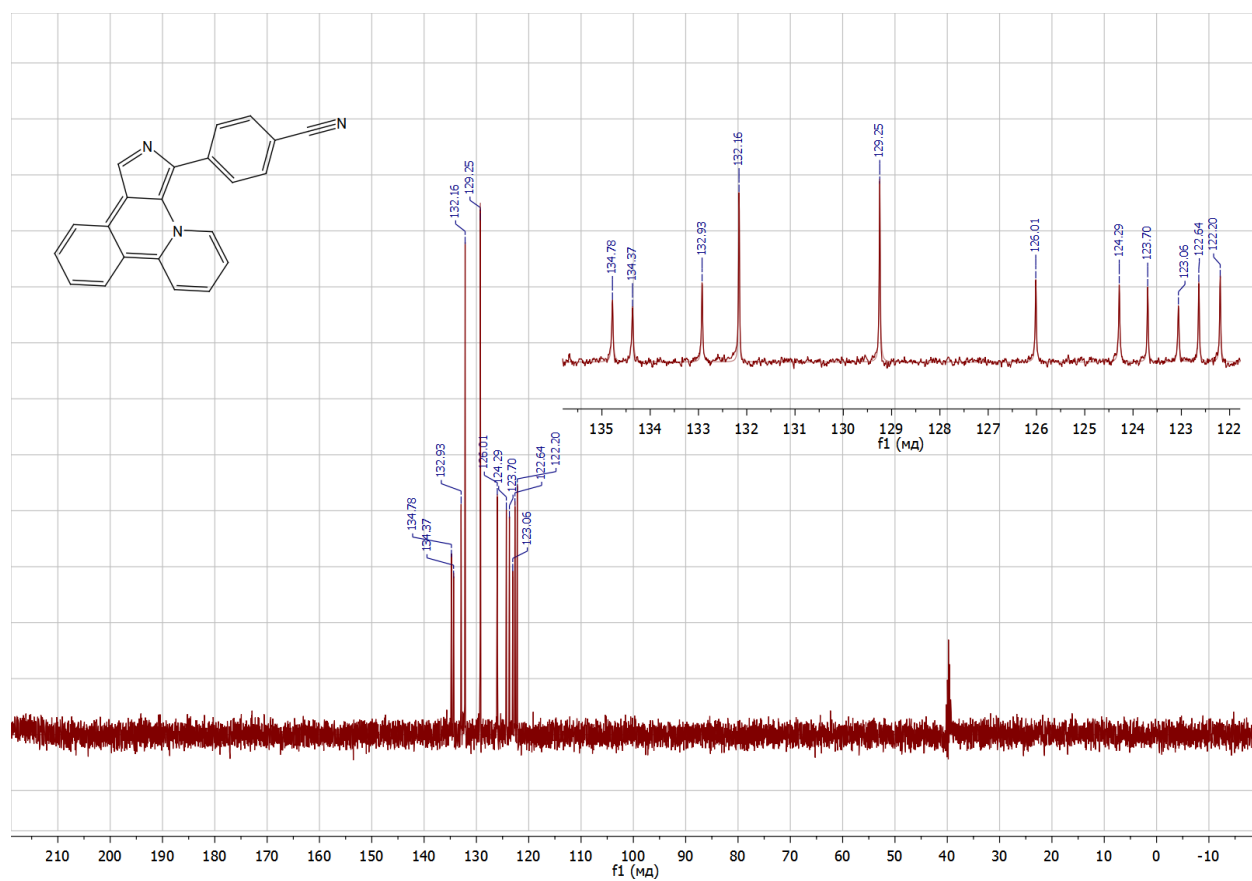

$^1\text{H}$  NMR (400 MHz,  $\text{DMSO}-d_6$ ) of 3-(pyridin-2-yl)pyrido[2,1-*a*]pyrrolo[3,4-*c*]isoquinoline (**6m**)

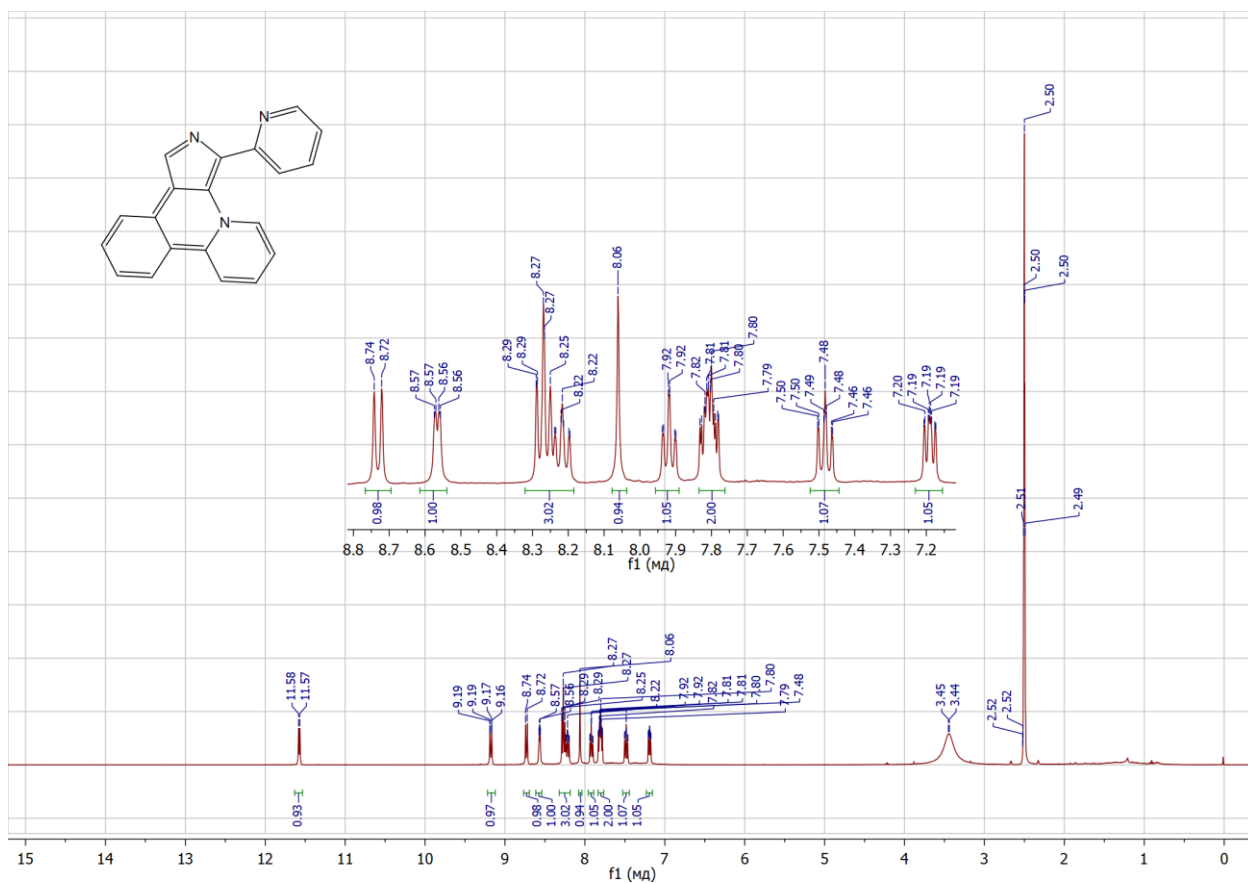

$^{13}\text{C}\{^1\text{H}\}$  NMR (101 MHz,  $\text{DMSO}-d_6$ ) of 3-(pyridin-2-yl)pyrido[2,1-*a*]pyrrolo[3,4-*c*]isoquinoline (**6m**)

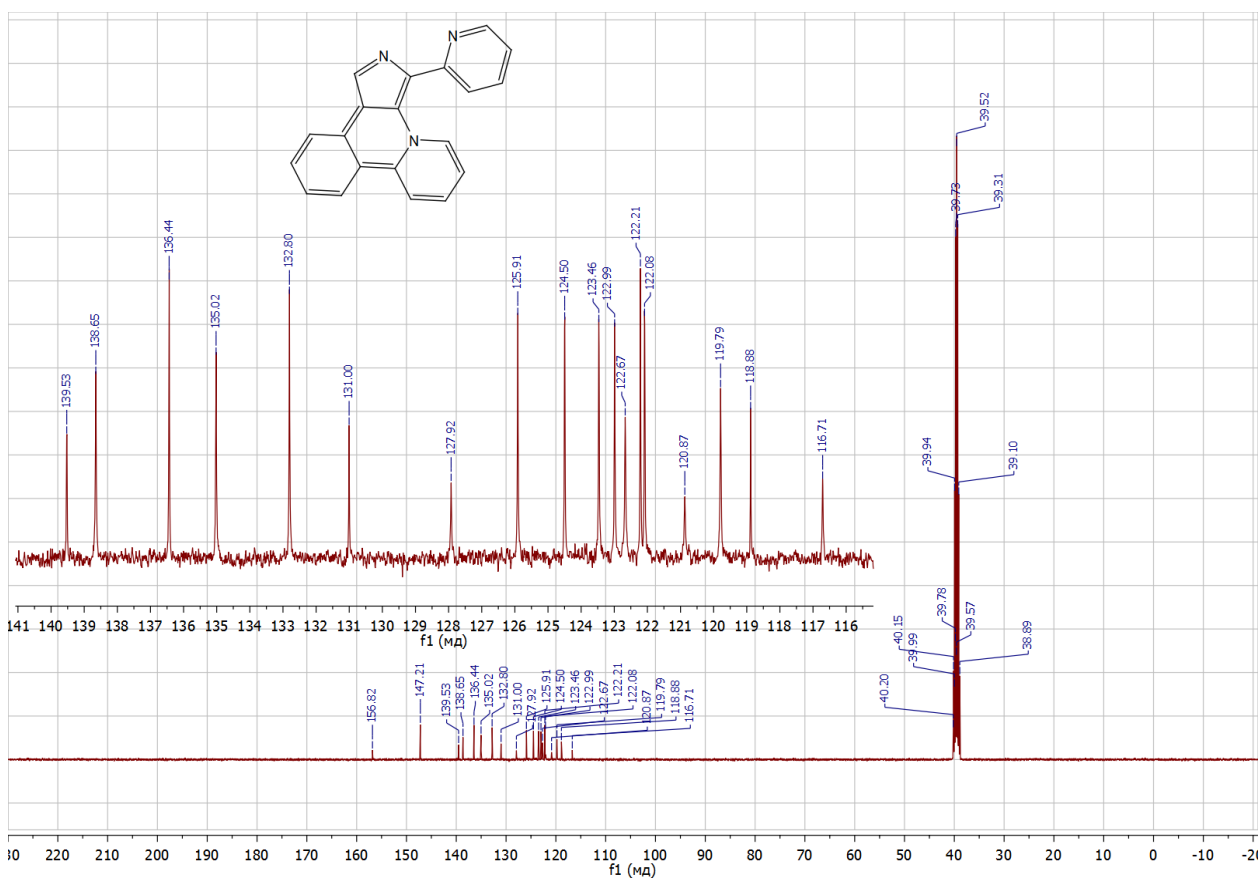

$^{13}\text{C}$  DEPT135 NMR (101 MHz,  $\text{DMSO}-d_6$ ) of 3-(pyridin-2-yl)pyrido[2,1-*a*]pyrrolo[3,4-*c*]isoquinoline (**6m**)

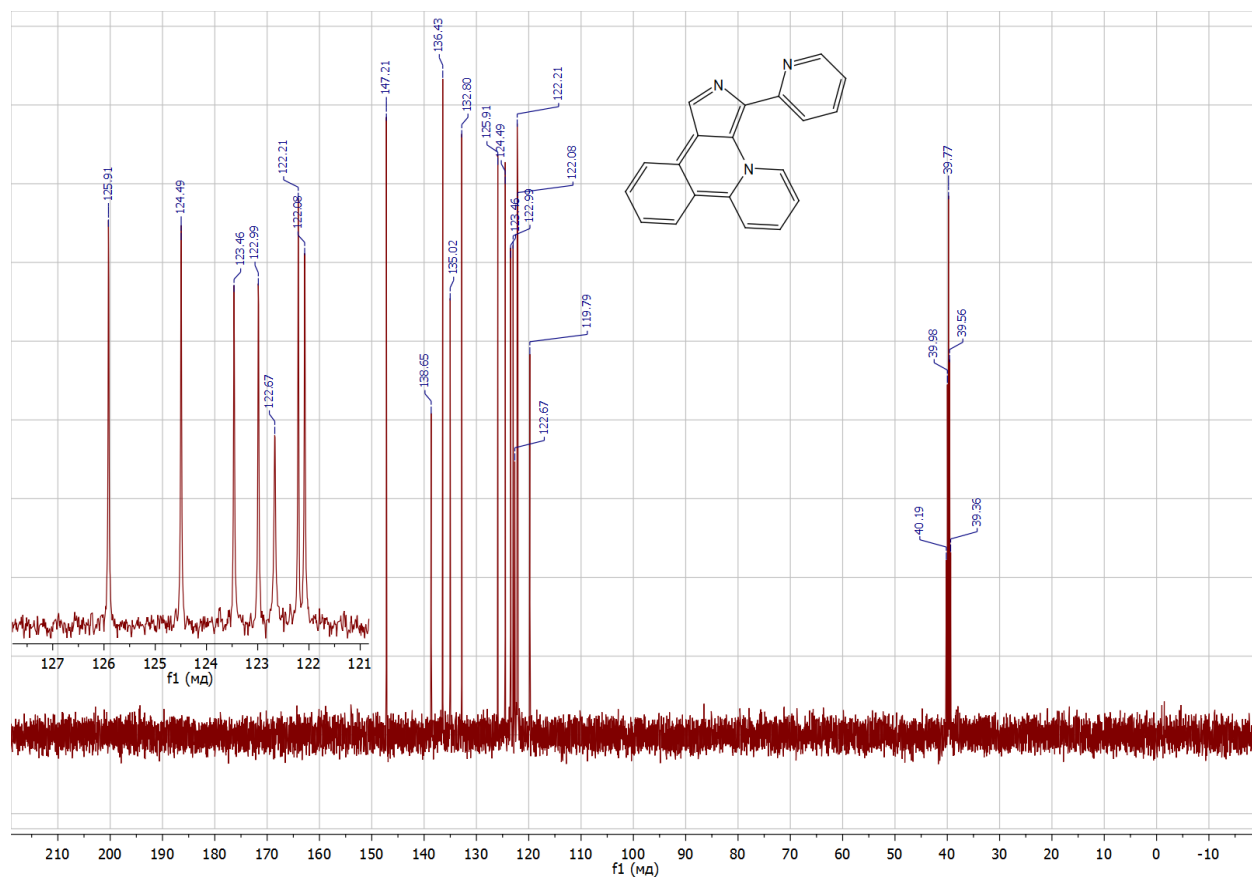



$^1\text{H}$  NMR (400 MHz,  $\text{DMSO}-d_6$ ) of 7-methyl-3-phenylpyrido[2,1-*a*]pyrrolo[3,4-*c*]isoquinoline (**6n**)

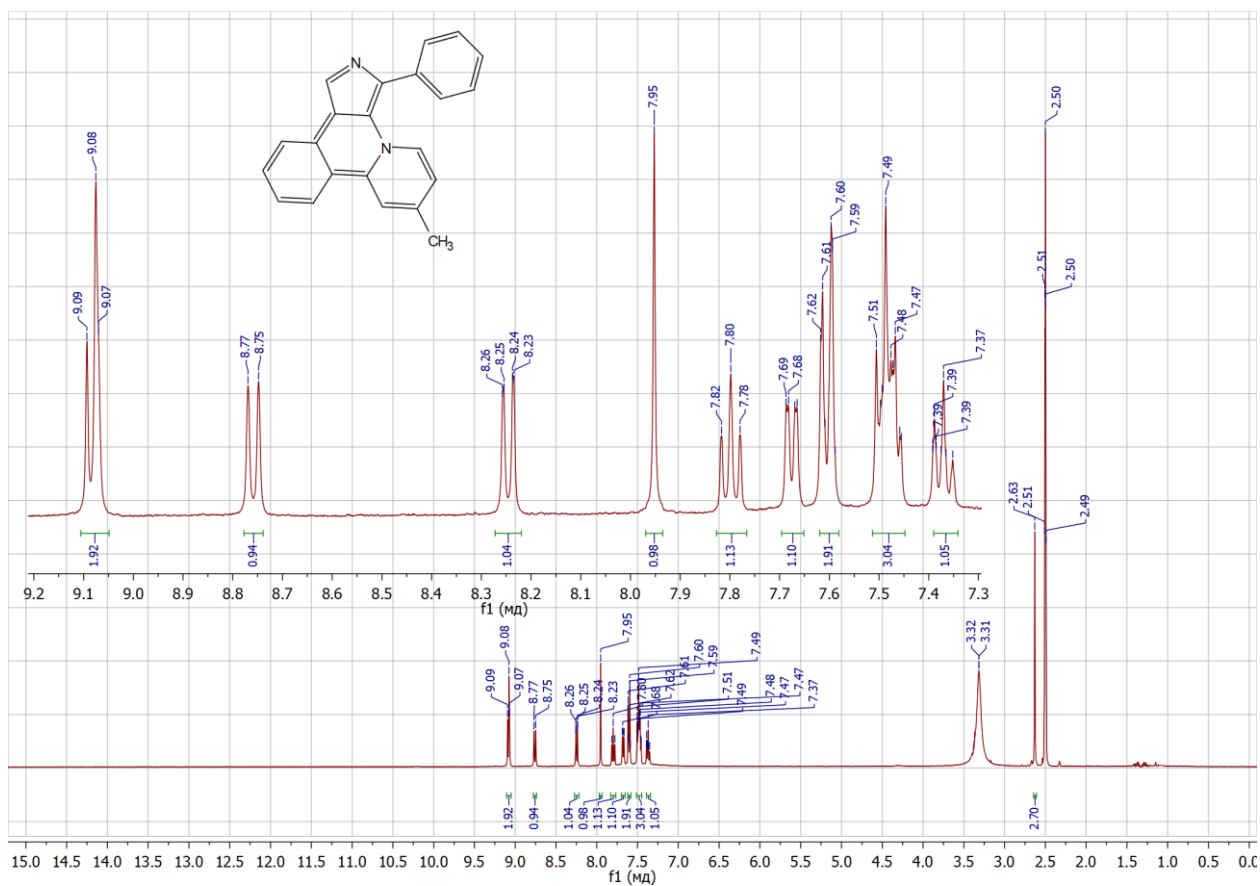

$^{13}\text{C}\{^1\text{H}\}$  NMR (101 MHz,  $\text{DMSO}-d_6$ ) of 7-methyl-3-phenylpyrido[2,1-*a*]pyrrolo[3,4-*c*]isoquinoline (**6n**)

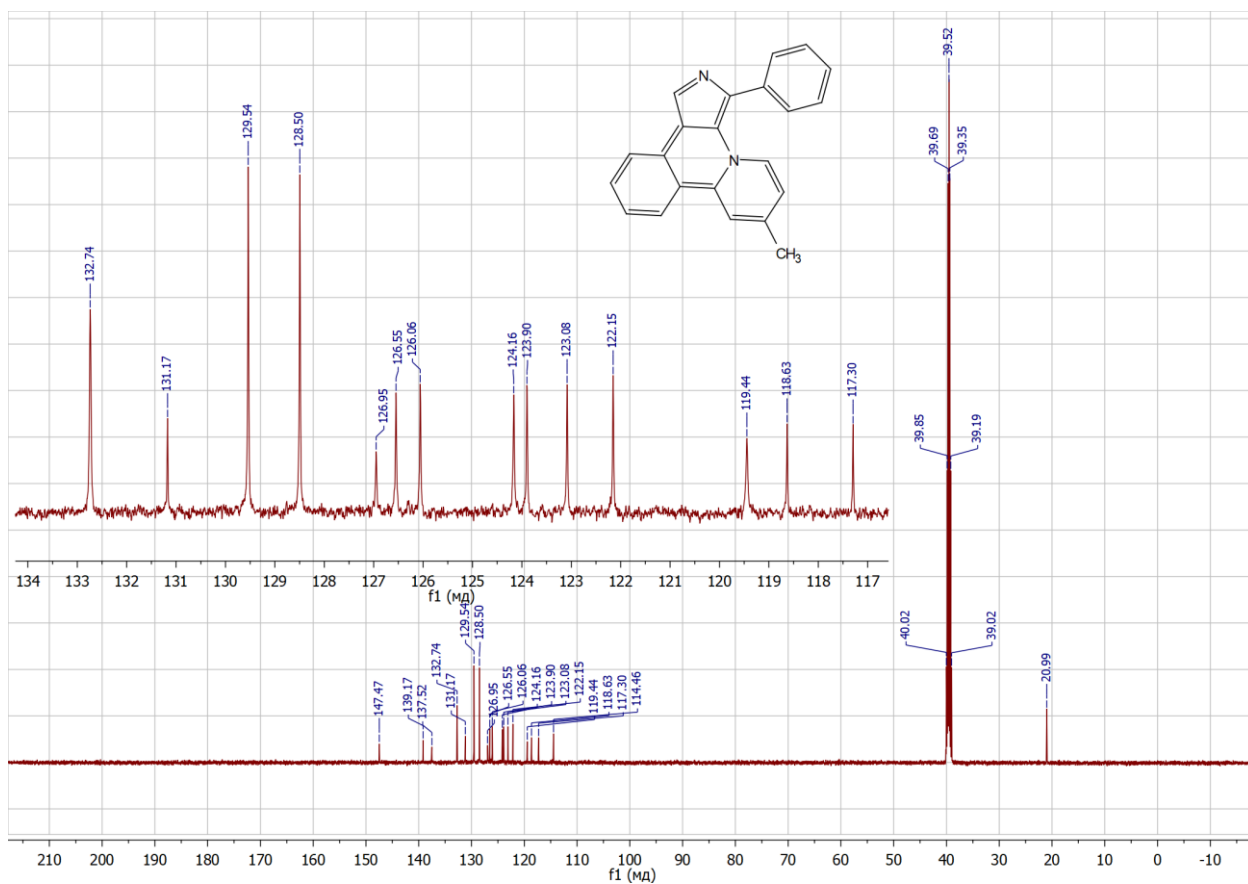

$^{13}\text{C}$  DEPT135 NMR (101 MHz,  $\text{DMSO}-d_6$ ) of 7-methyl-3-phenylpyrido[2,1-*a*]pyrrolo[3,4-*c*]isoquinoline (**6n**)

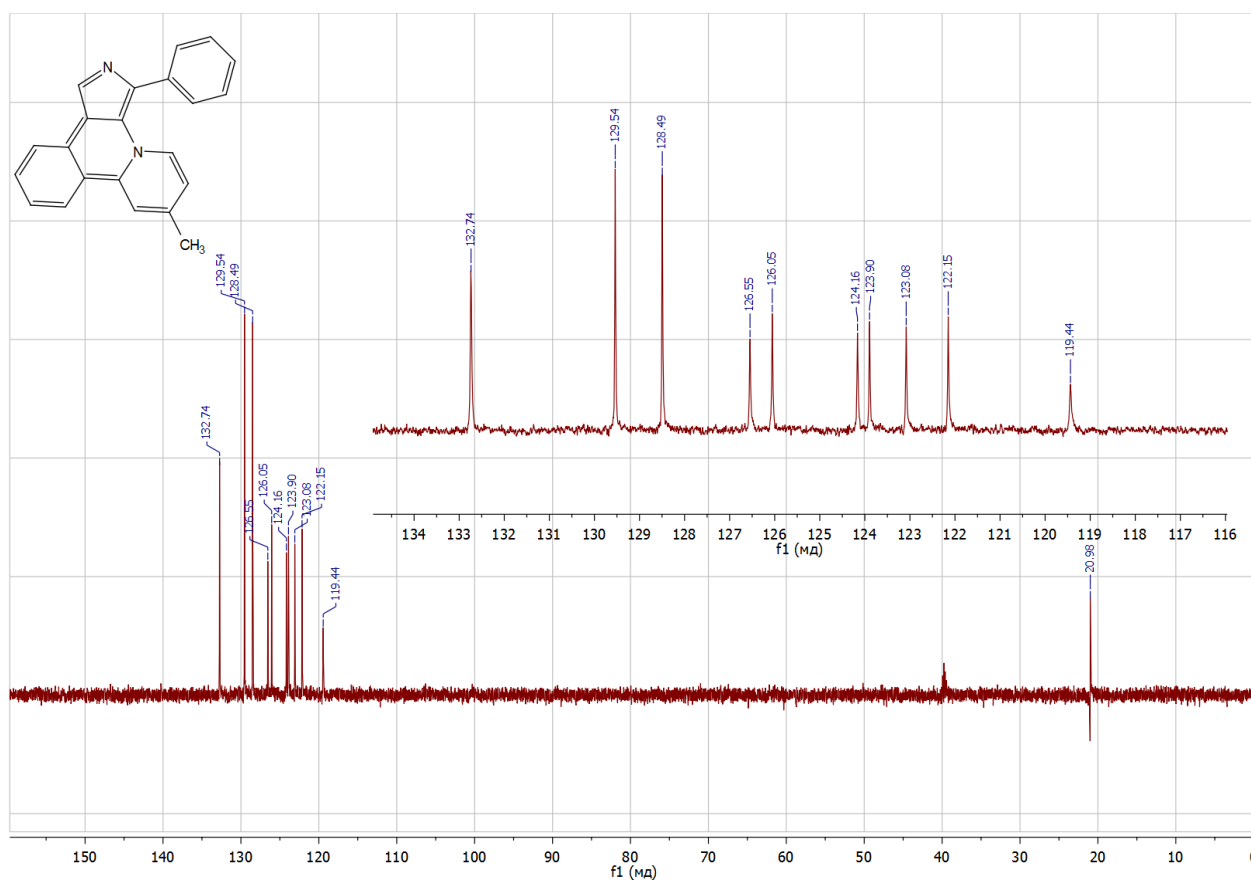

$^1\text{H}$  NMR (400 MHz,  $\text{DMSO}-d_6$ ) of 7-methoxy-3-phenylpyrido[2,1-*a*]pyrrolo[3,4-*c*]isoquinoline (**60**)

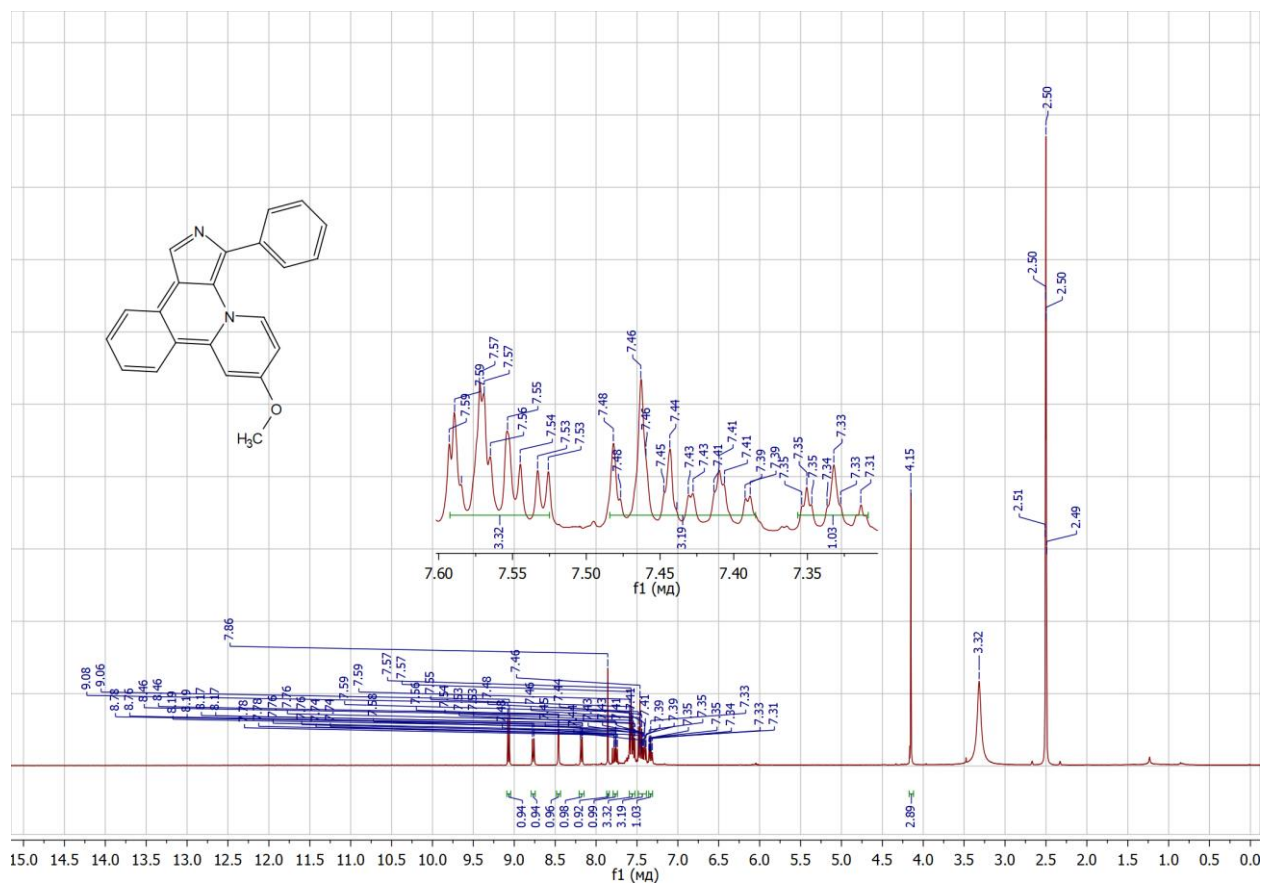

$^{13}\text{C}$  DEPT135 NMR (101 MHz,  $\text{DMSO}-d_6$ ) of 7-methoxy-3-phenylpyrido[2,1-*a*]pyrrolo[3,4-*c*]isoquinoline (**60**)

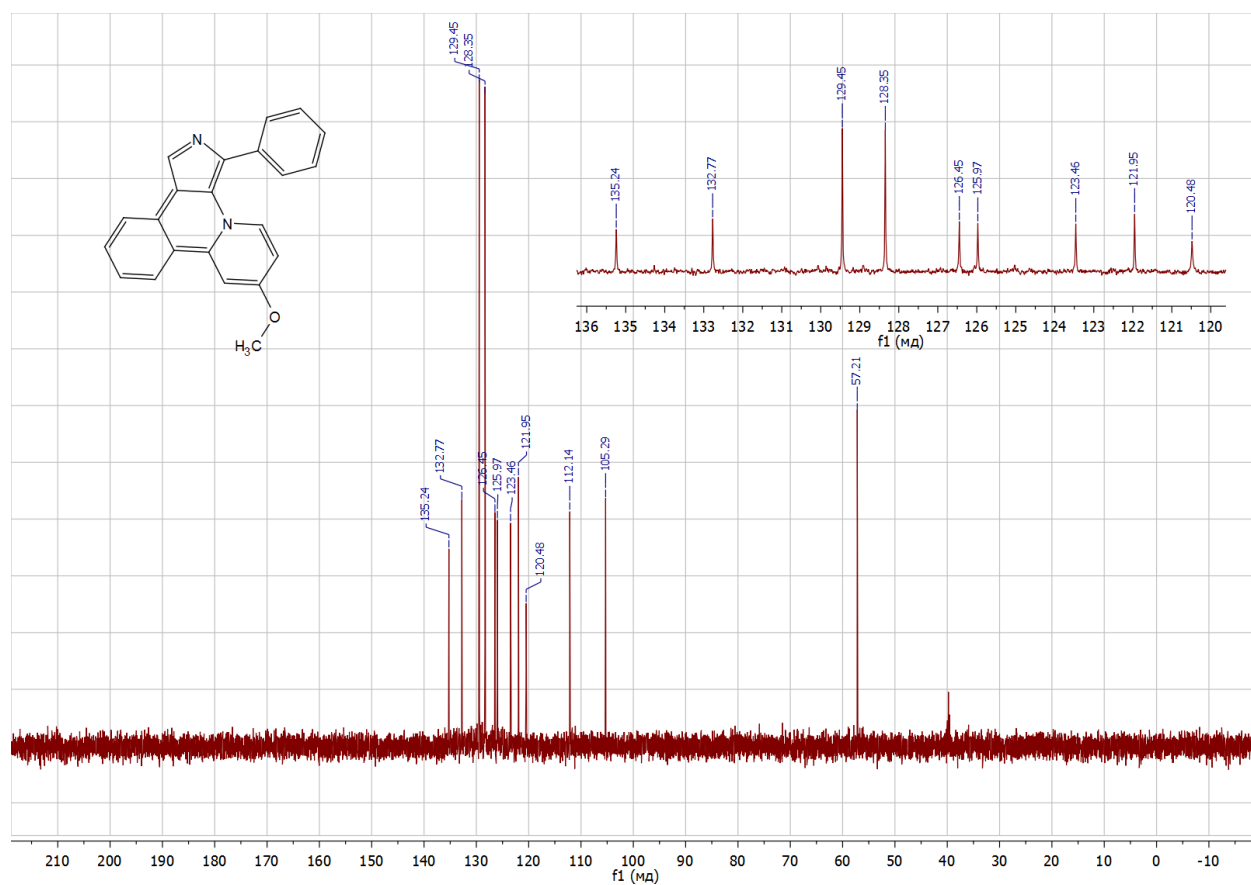

$^1\text{H}$  NMR (400 MHz,  $\text{DMSO}-d_6$ ) of N,N-dimethyl-3-phenylpyrido[2,1-*a*]pyrrolo[3,4-*c*]isoquinolin-7-amine (**6p**)

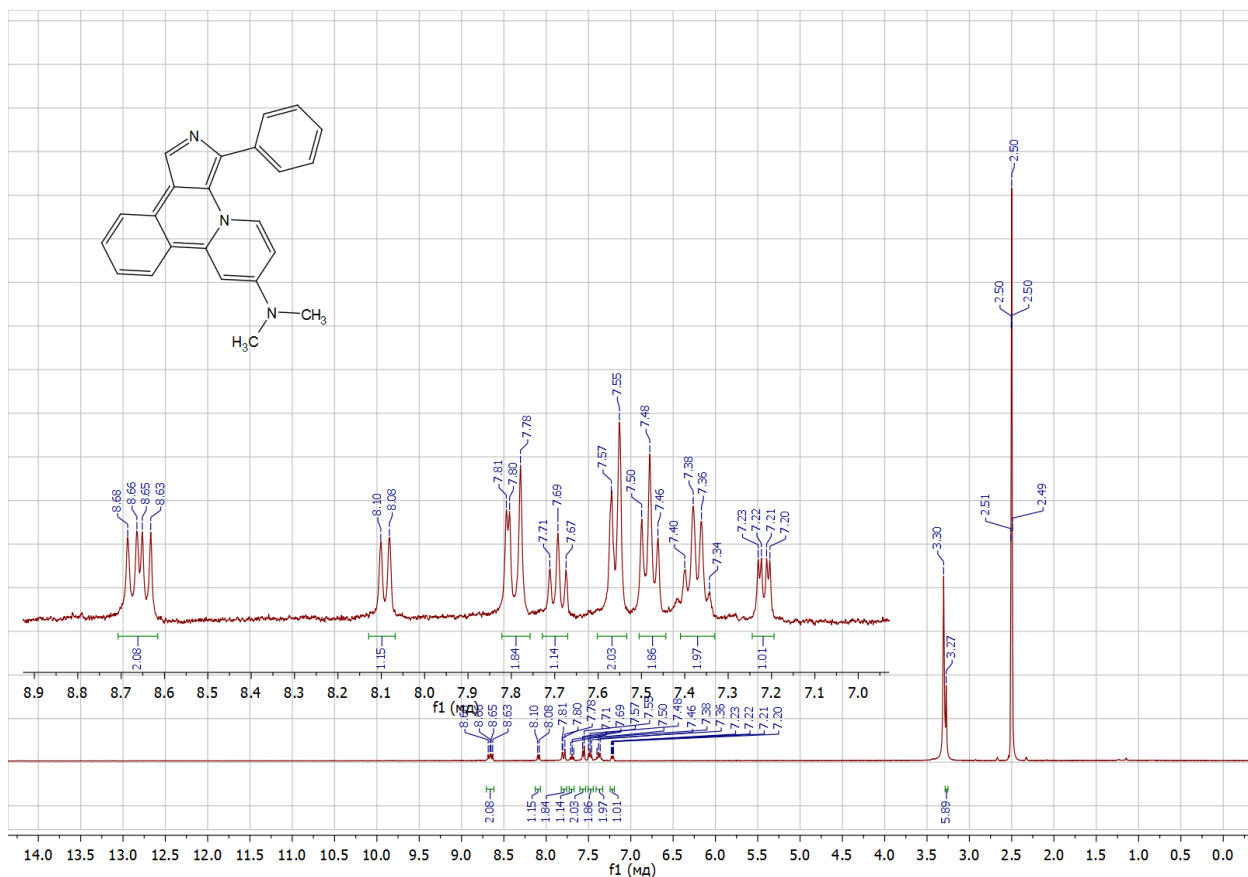

$^{13}\text{C}\{^1\text{H}\}$  NMR (101 MHz,  $\text{DMSO}-d_6$ ) of N,N-dimethyl-3-phenylpyrido[2,1-*a*]pyrrolo[3,4-*c*]isoquinolin-7-amine (**6p**)

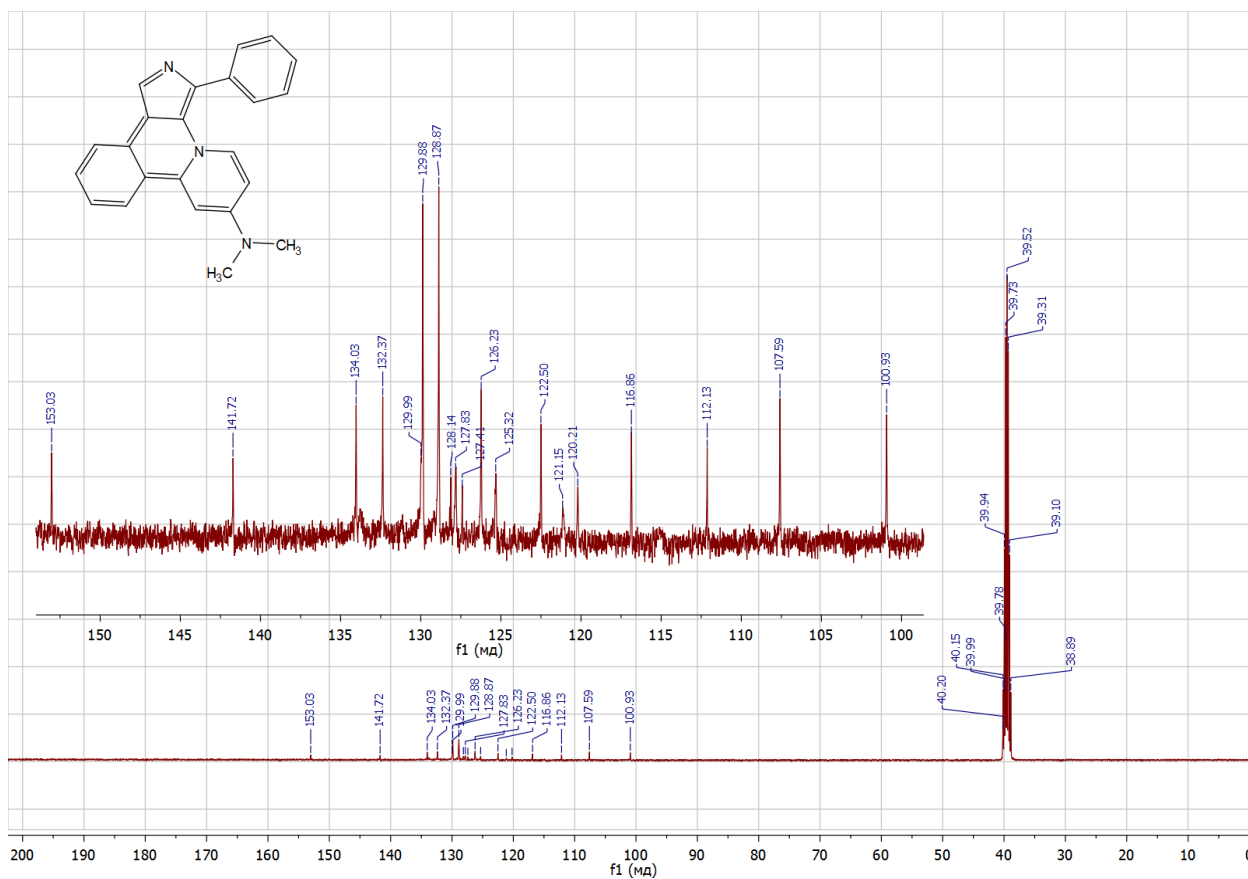

Chemical structure: 1-methyl-2-phenyl-1H-benz[e]pyrrole

<sup>13</sup>C NMR spectrum (CDCl<sub>3</sub>) showing peaks (ppm):

| Peak (ppm) |
|------------|
| 134.03     |
| 132.37     |
| 129.87     |
| 128.87     |
| 128.13     |
| 127.82     |
| 127.40     |
| 126.23     |
| 125.32     |
| 122.50     |
| 107.59     |
| 100.94     |
| 39.99      |
| 39.57      |
| 39.36      |

Inset peaks (ppm):

| Peak (ppm) |
|------------|
| 129.87     |
| 128.87     |
| 128.13     |
| 127.82     |
| 127.40     |
| 126.23     |
| 125.32     |
| 122.50     |

$^1\text{H}$  NMR (400 MHz,  $\text{DMSO}-d_6$ ) of 3,7-diphenylpyrido[2,1-*a*]pyrrolo[3,4-*c*]isoquinoline (**6q**)

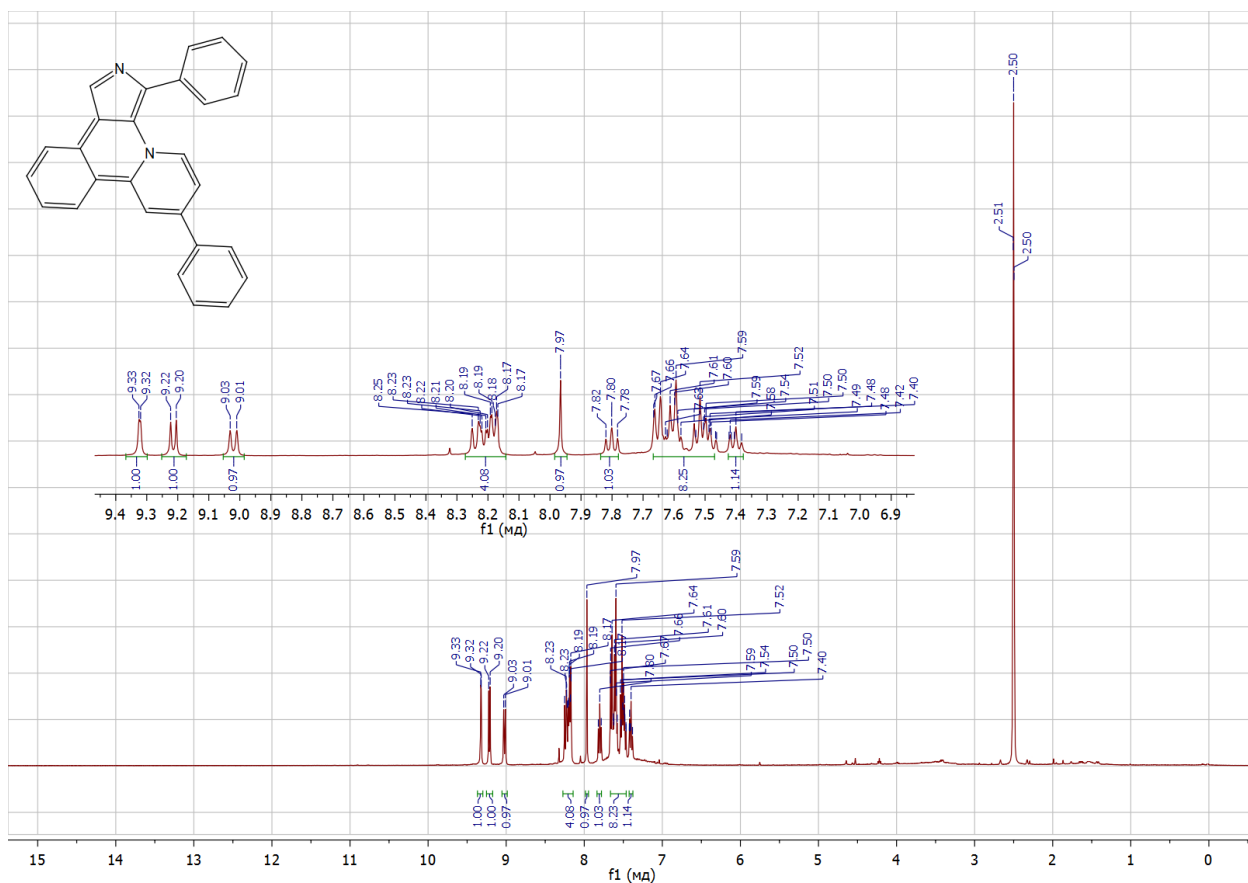

$^{13}\text{C}\{^1\text{H}\}$  NMR (101 MHz,  $\text{DMSO}-d_6$ ) of 3,7-diphenylpyrido[2,1-*a*]pyrrolo[3,4-*c*]isoquinoline (**6q**)

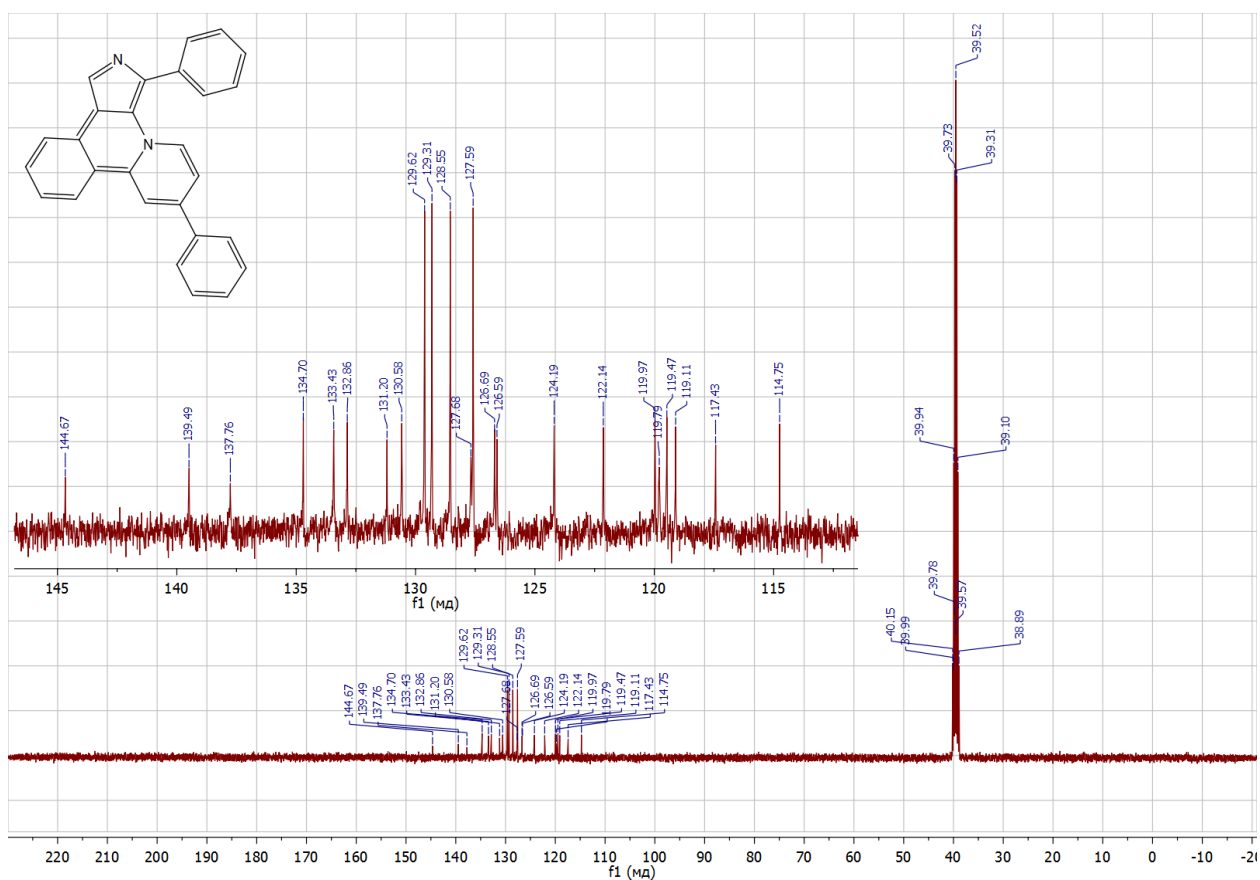

$^{13}\text{C}$  DEPT135 NMR (101 MHz,  $\text{DMSO}-d_6$ ) of 3,7-diphenylpyrido[2,1-*a*]pyrrolo[3,4-*c*]isoquinoline (**6q**)

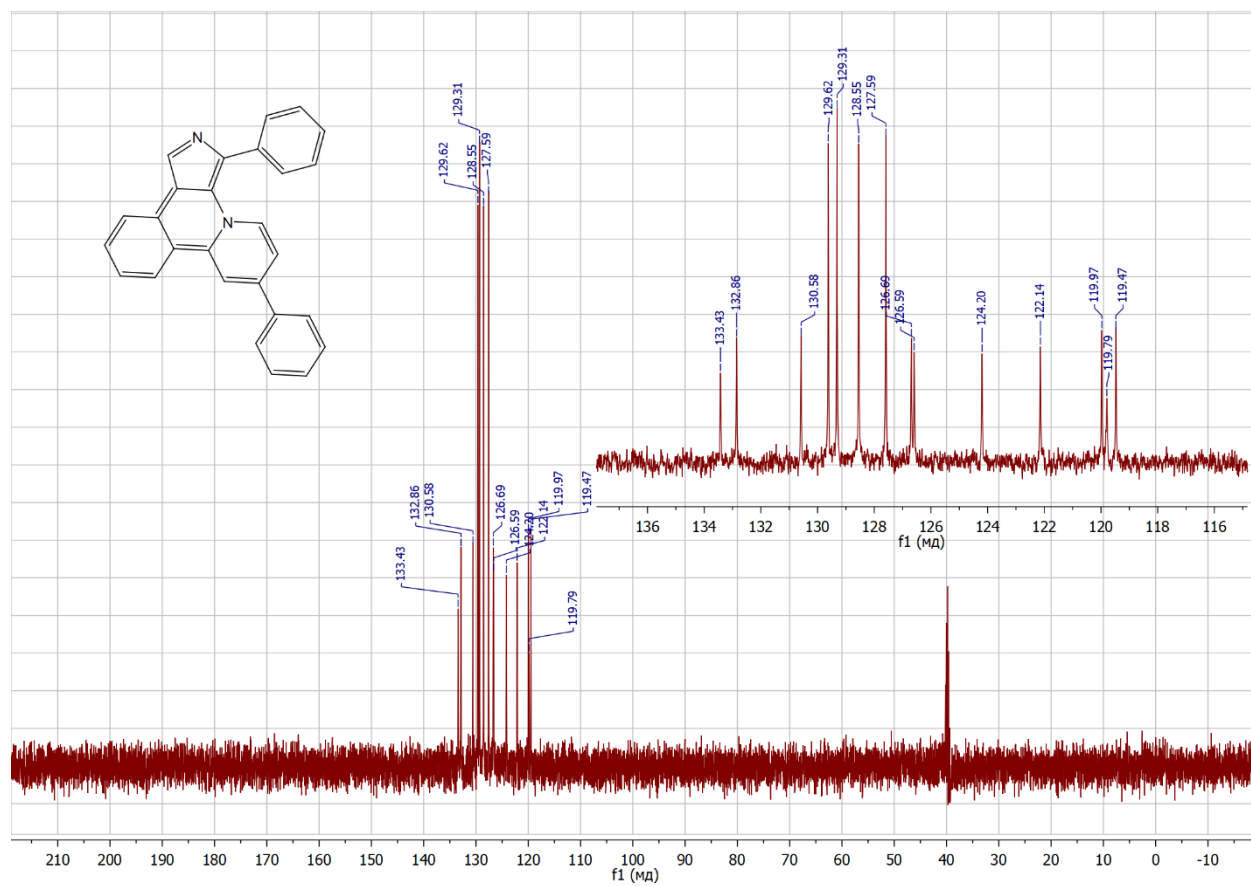



$^1\text{H}$  NMR (400 MHz,  $\text{DMSO}-d_6$ ) of 7-(4-methoxyphenyl)-3-phenylpyrido[2,1-*a*]pyrrolo[3,4-*c*]isoquinoline (**6r**)

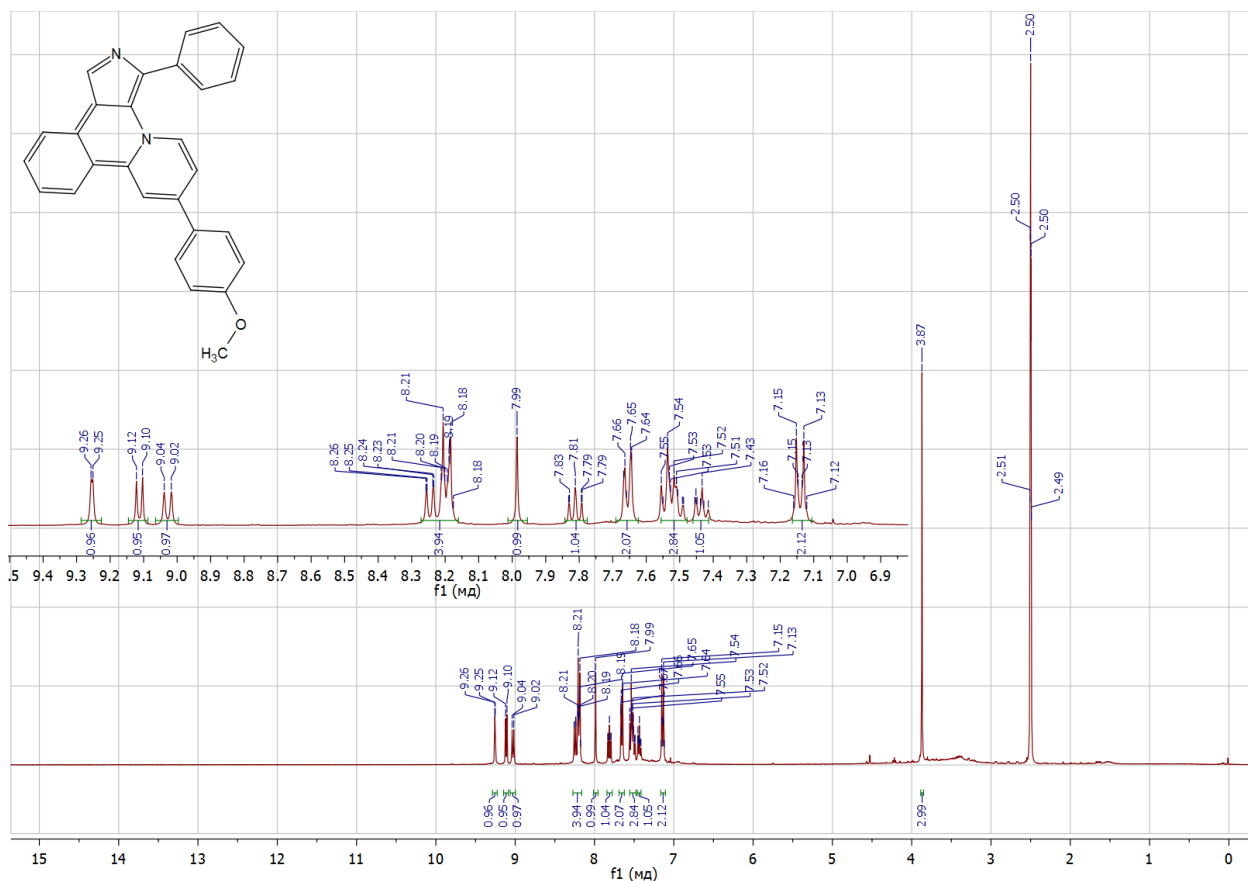

$^{13}\text{C}\{^1\text{H}\}$  NMR (101 MHz,  $\text{DMSO}-d_6$ ) of 7-(4-methoxyphenyl)-3-phenylpyrido[2,1-*a*]pyrrolo[3,4-*c*]isoquinoline (**6r**)

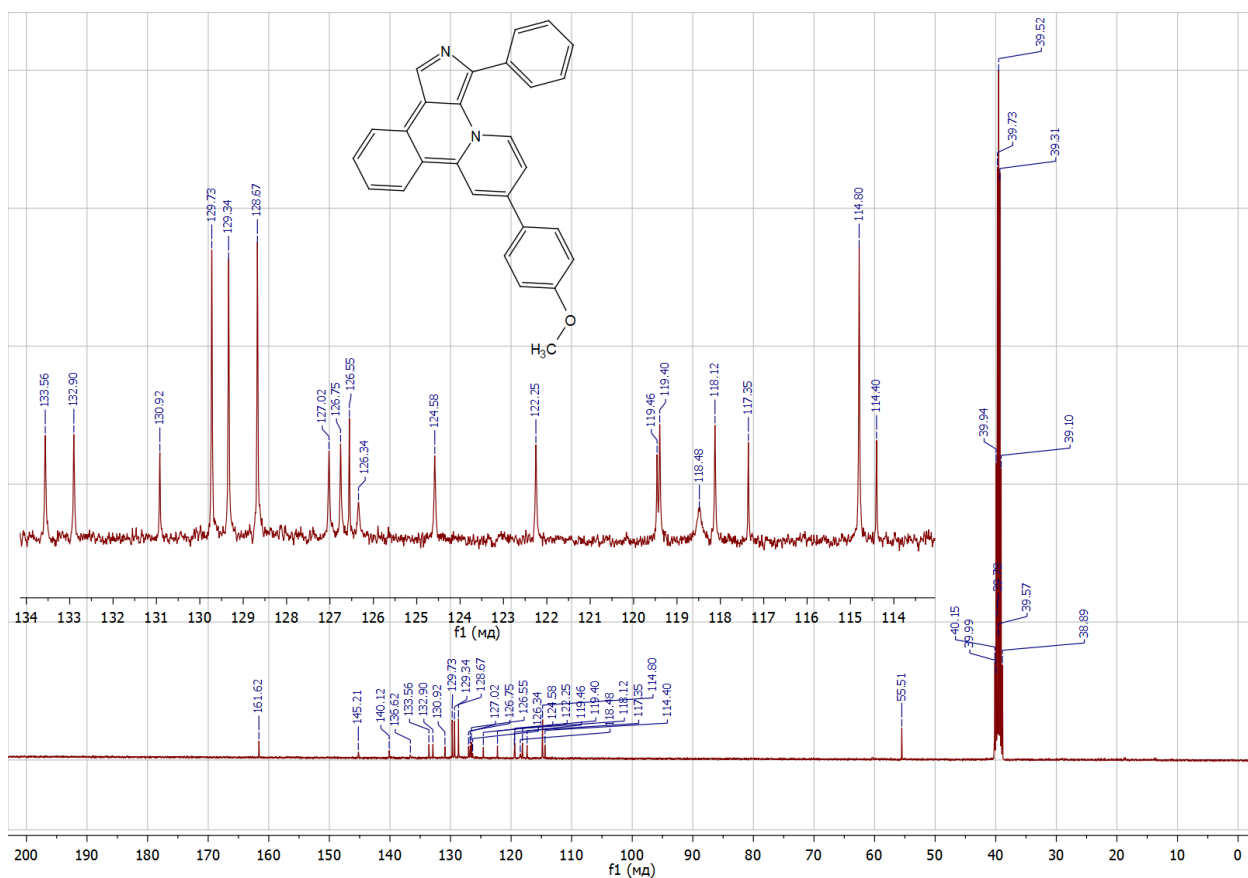

$^{13}\text{C}$  DEPT135 NMR (101 MHz,  $\text{DMSO}-d_6$ ) of 7-(4-methoxyphenyl)-3-phenylpyrido[2,1-*a*]pyrrolo[3,4-*c*]isoquinoline (**6r**)

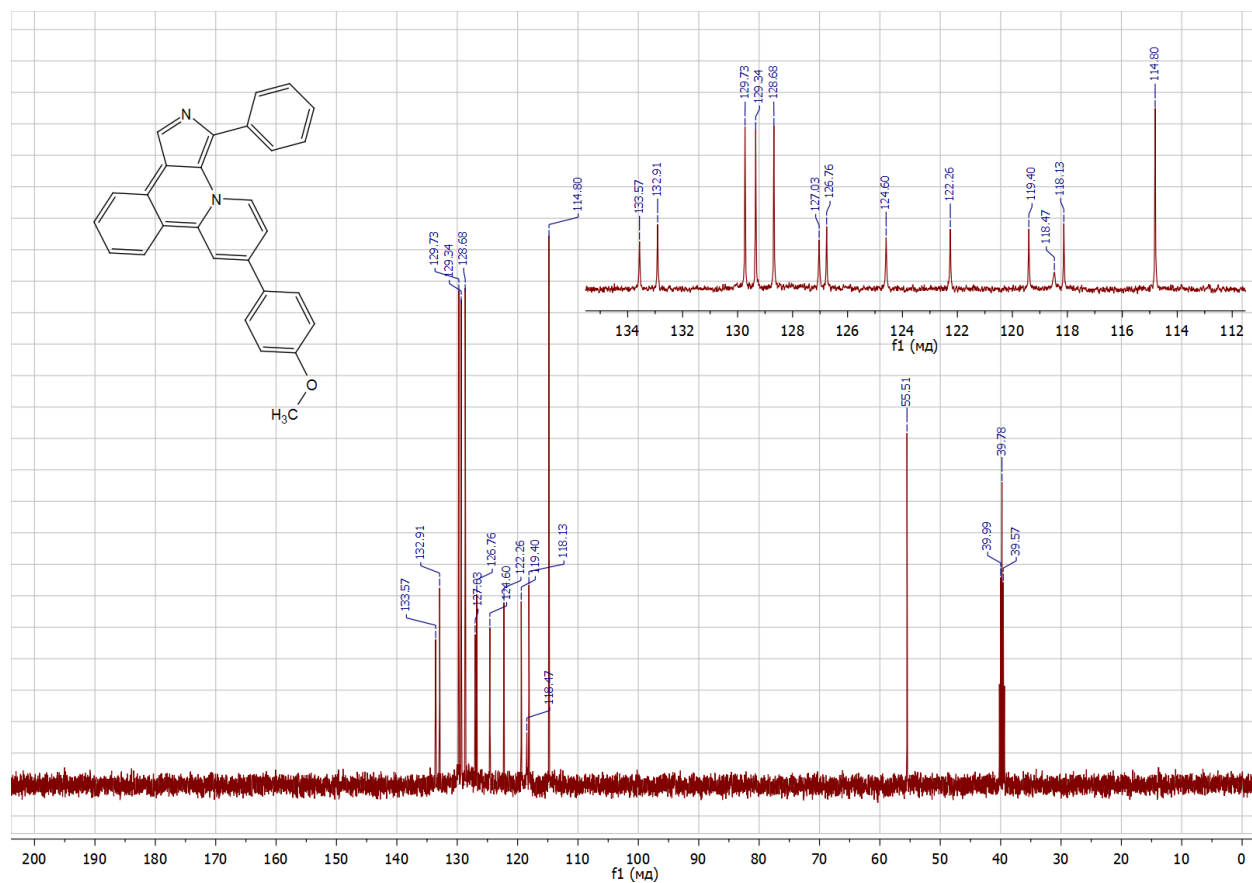

$^1\text{H}$  NMR (400 MHz,  $\text{DMSO}-d_6$ ) of 6,8-dimethyl-3-phenylpyrido[2,1-*a*]pyrrolo[3,4-*c*]isoquinoline (**6s**)

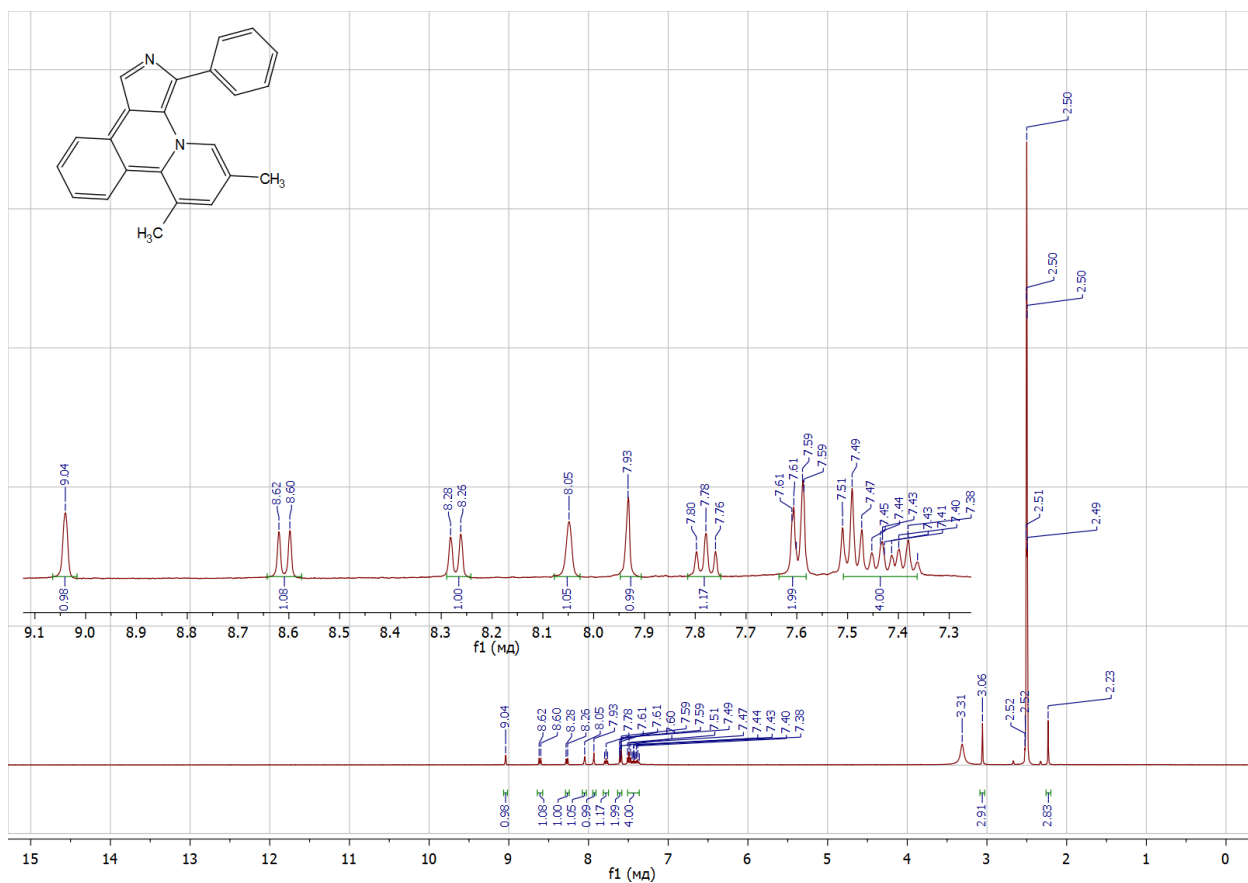

$^{13}\text{C}\{^1\text{H}\}$  NMR (101 MHz,  $\text{DMSO}-d_6$ ) of 6,8-dimethyl-3-phenylpyrido[2,1-*a*]pyrrolo[3,4-*c*]isoquinoline (**6s**)

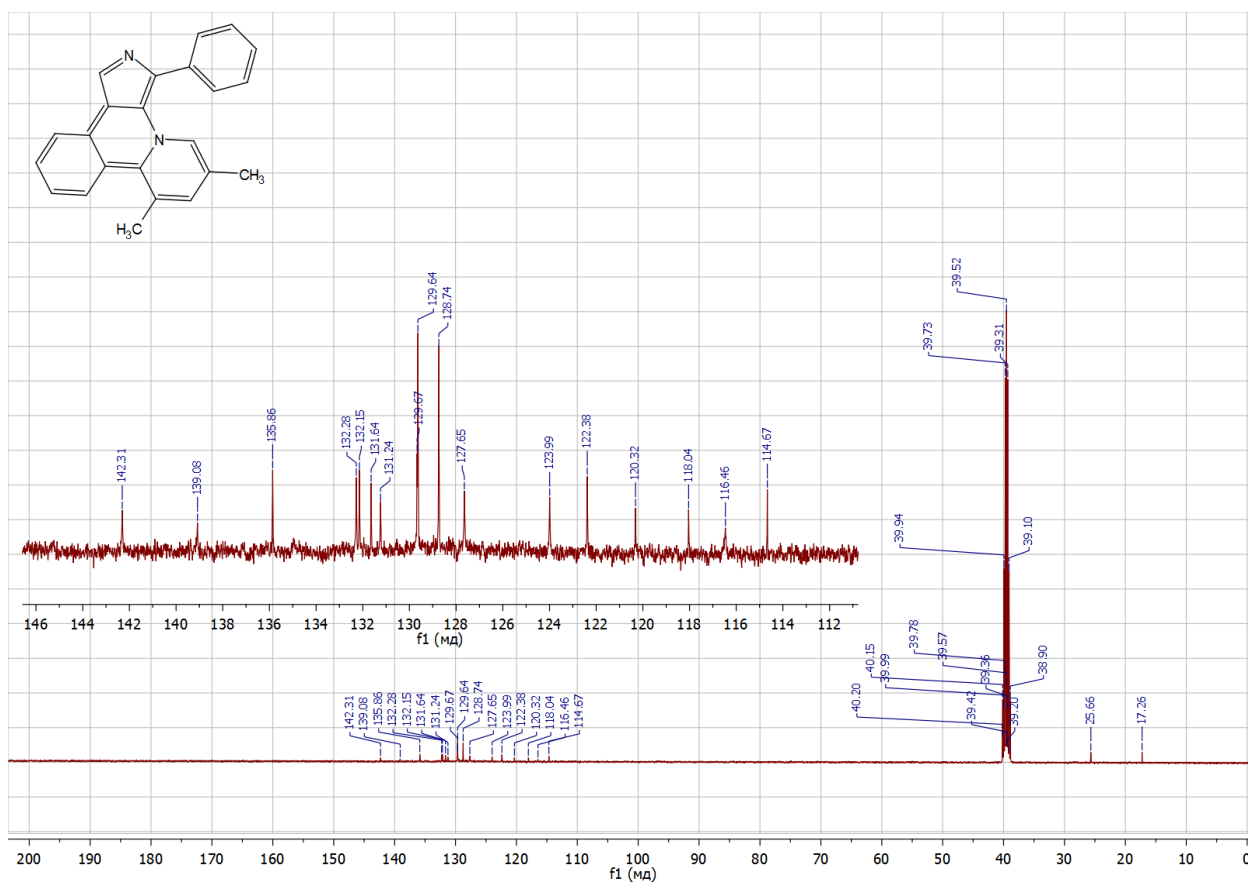

$^{13}\text{C}$  DEPT135 NMR (101 MHz,  $\text{DMSO-}d_6$ ) of 6,8-dimethyl-3-phenylpyrido[2,1-*a*]pyrrolo[3,4-*c*]isoquinoline (**6s**)

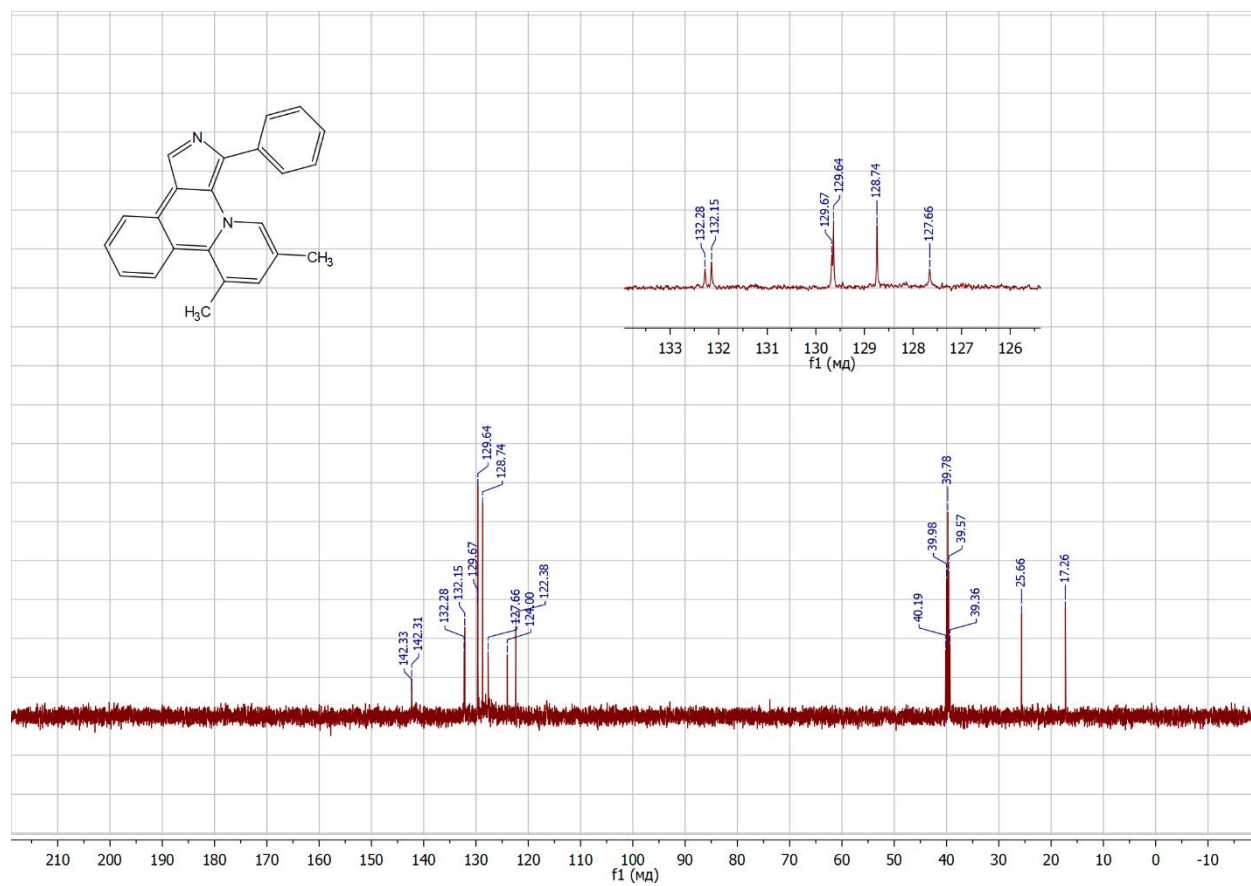

$^1\text{H}$  NMR (400 MHz,  $\text{DMSO}-d_6$ ) of 1-(4-(2-bromophenyl)-5-(*tert*-butoxycarbonyl)-2-phenyl-1*H*-pyrrol-3-yl)pyridin-1-ium bromide (**7**)

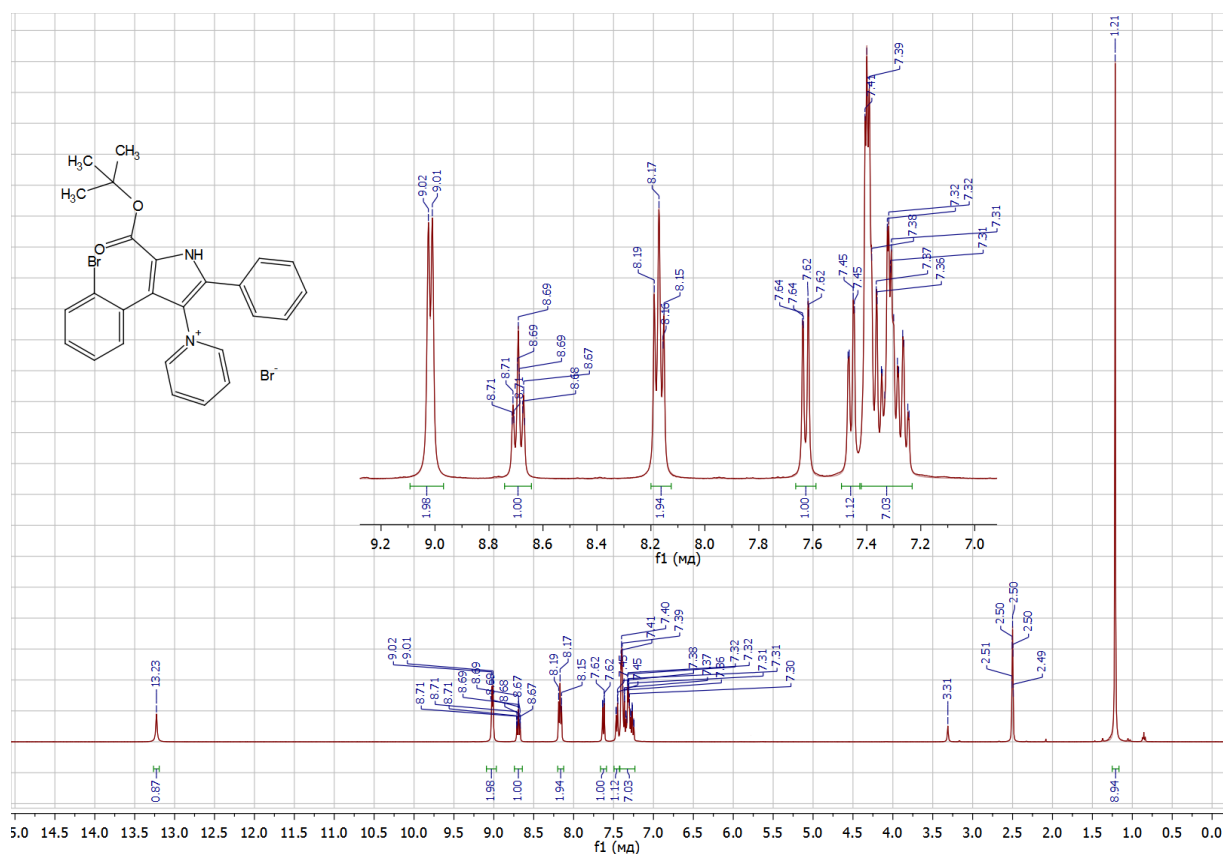

$^{13}\text{C}\{^1\text{H}\}$  NMR (101 MHz,  $\text{DMSO}-d_6$ ) of 1-(4-(2-bromophenyl)-5-(*tert*-butoxycarbonyl)-2-phenyl-1*H*-pyrrol-3-yl)pyridin-1-ium bromide (**7**)

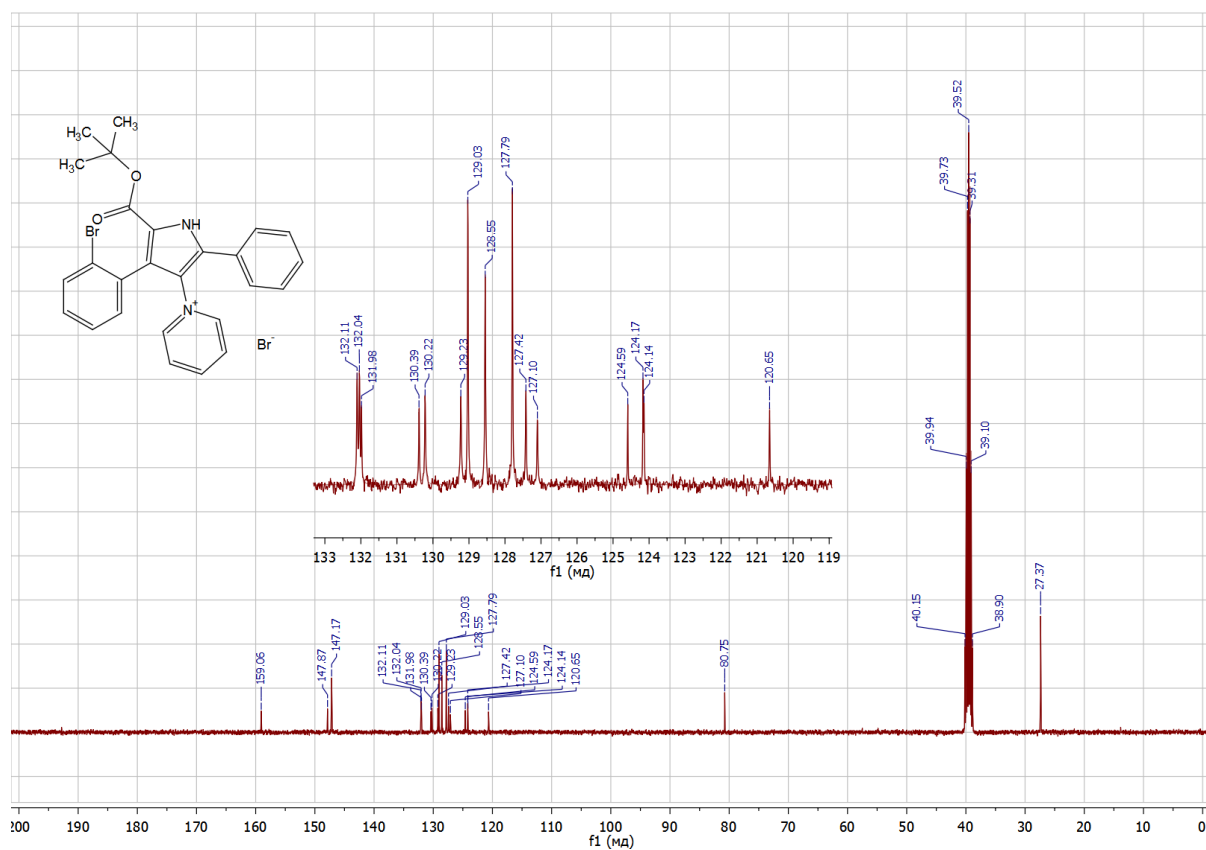

$^{13}\text{C}$  DEPT135 NMR (101 MHz,  $\text{DMSO-}d_6$ ) of 1-(4-(2-bromophenyl)-5-(*tert*-butoxycarbonyl)-2-phenyl-1*H*-pyrrol-3-yl)pyridin-1-ium bromide (**7**)

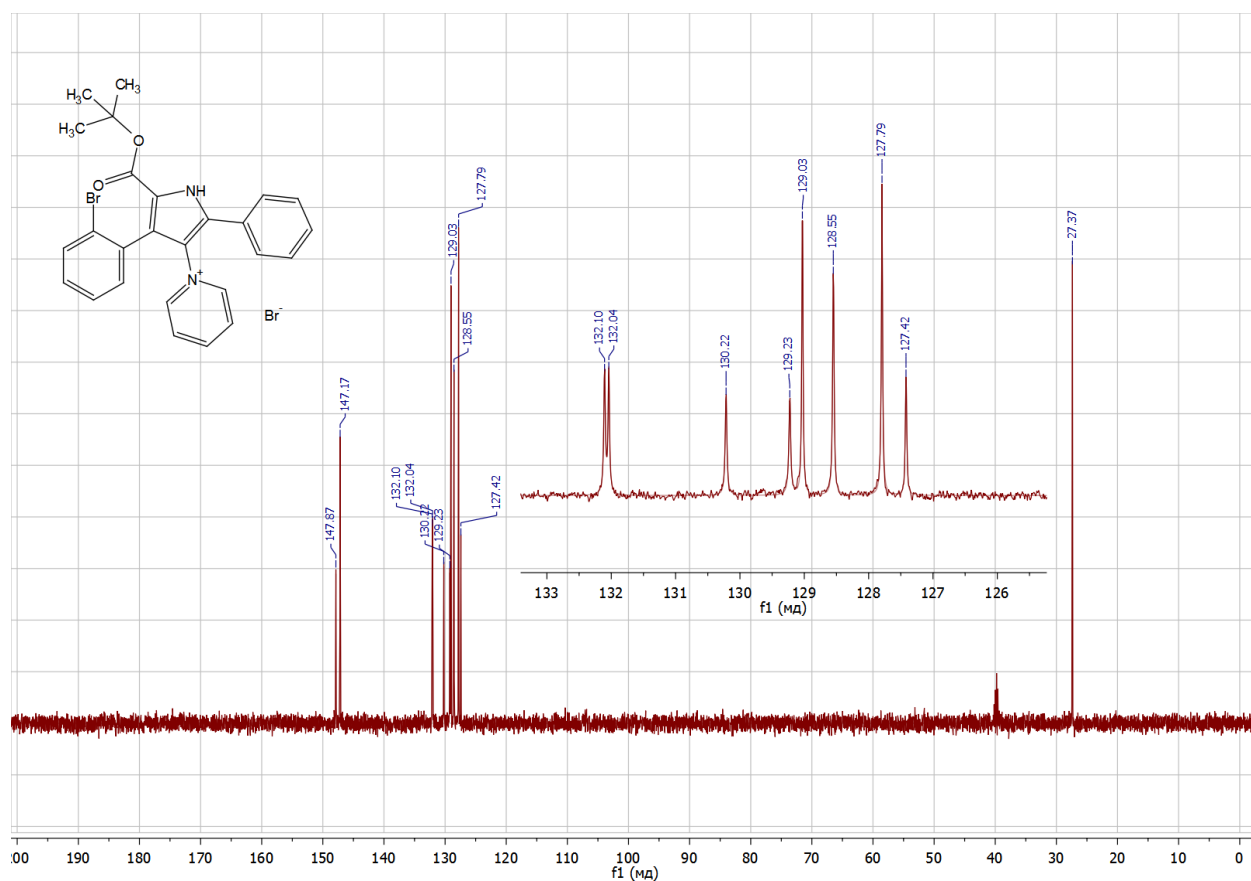

$^1\text{H}$  NMR (400 MHz,  $\text{DMSO-}d_6$ ) of 1-(*tert*-butoxycarbonyl)-3-phenyl-2*H*-pyrido[2,1-*a*]pyrrolo[3,4-*c*]isoquinolin-4-ium bromide (**8**)

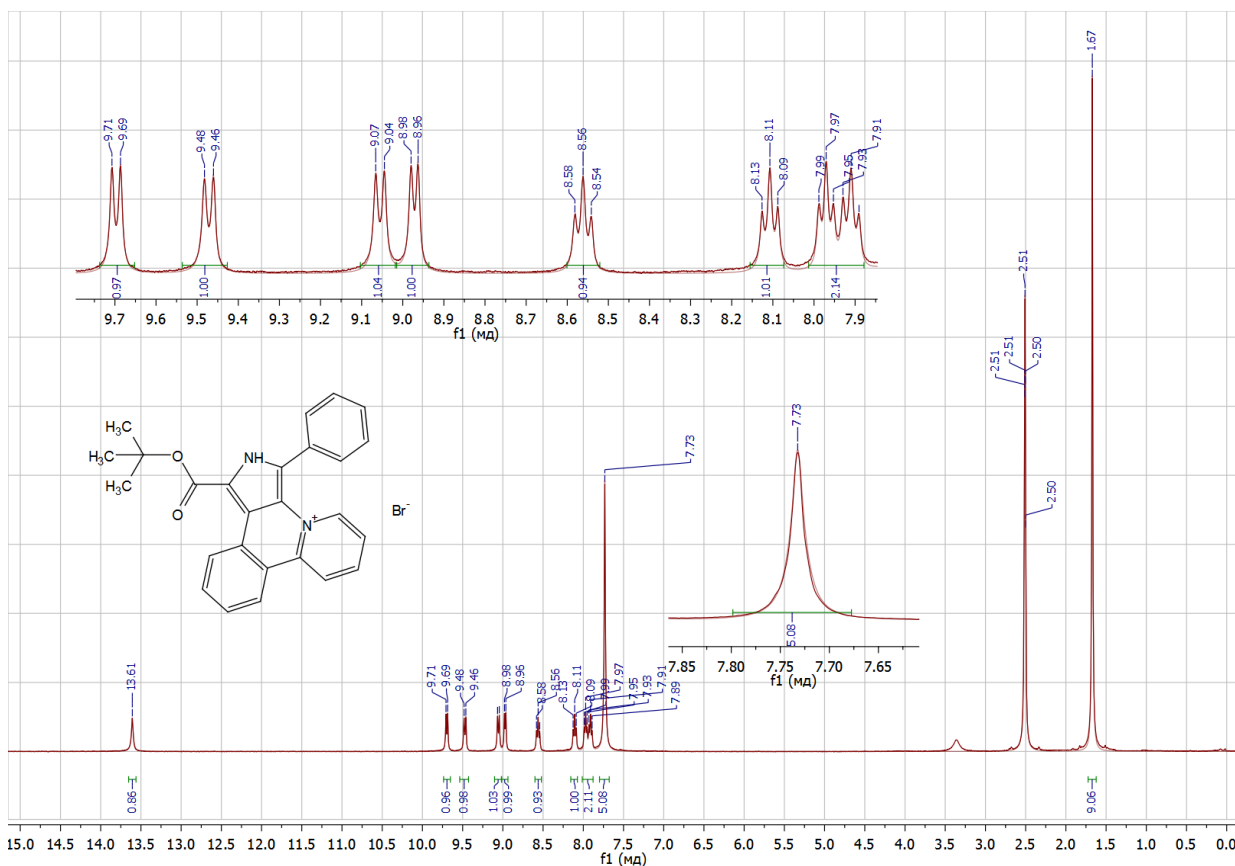

$^{13}\text{C}\{^1\text{H}\}$  NMR (101 MHz,  $\text{DMSO-}d_6$ ) of 1-(*tert*-butoxycarbonyl)-3-phenyl-2*H*-pyrido[2,1-*a*]pyrrolo[3,4-*c*]isoquinolin-4-ium bromide (**8**)

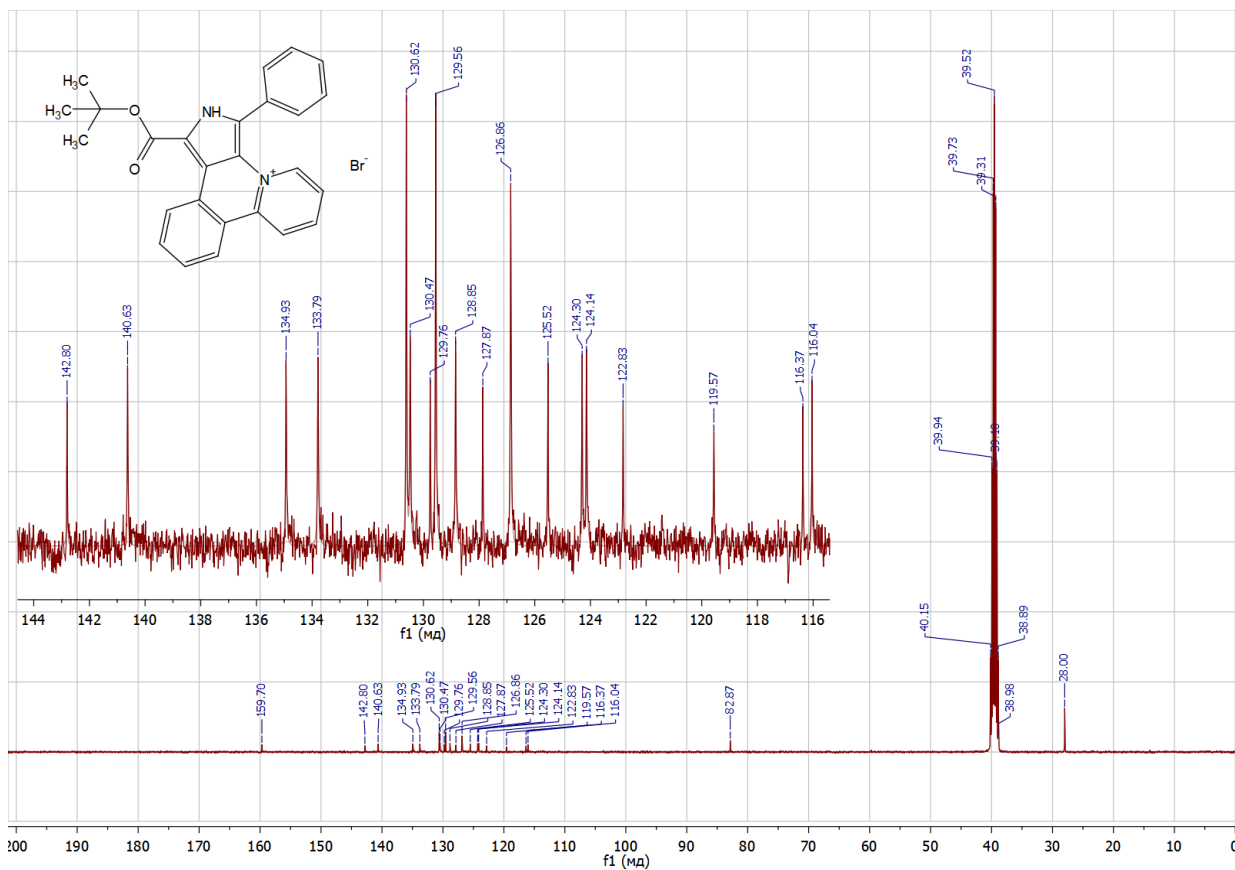

$^{13}\text{C}$  DEPT135 NMR (101 MHz,  $\text{DMSO-}d_6$ ) of 1-(*tert*-butoxycarbonyl)-3-phenyl-2*H*-pyrido[2,1-*a*]pyrrolo[3,4-*c*]isoquinolin-4-ium bromide (**8**)

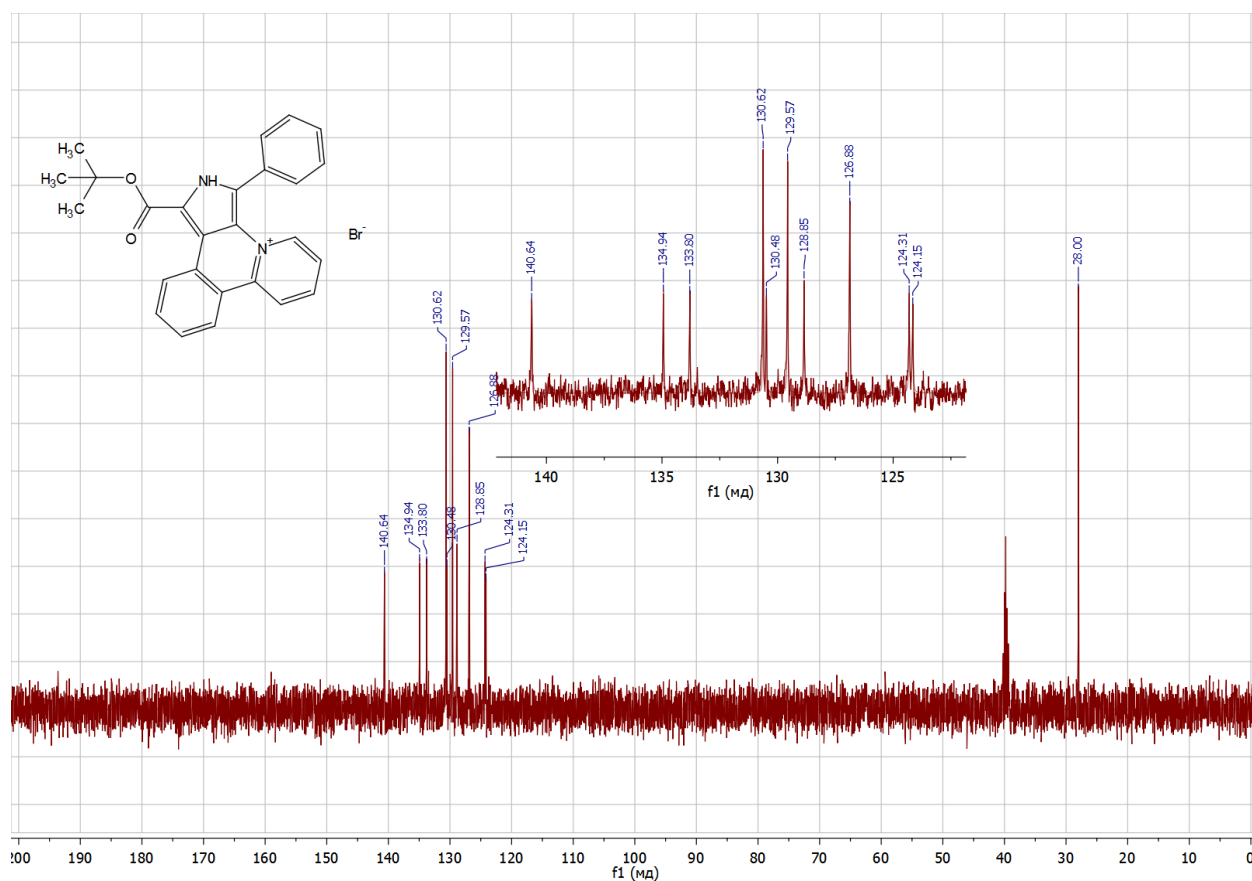



$^1\text{H}$  NMR (400 MHz,  $\text{DMSO}-d_6$ ) of 1-(2-(2-bromophenyl)-4-(2-iodophenyl)-1*H*-pyrrol-3-yl)pyridin-1-ium bromide (**9**)

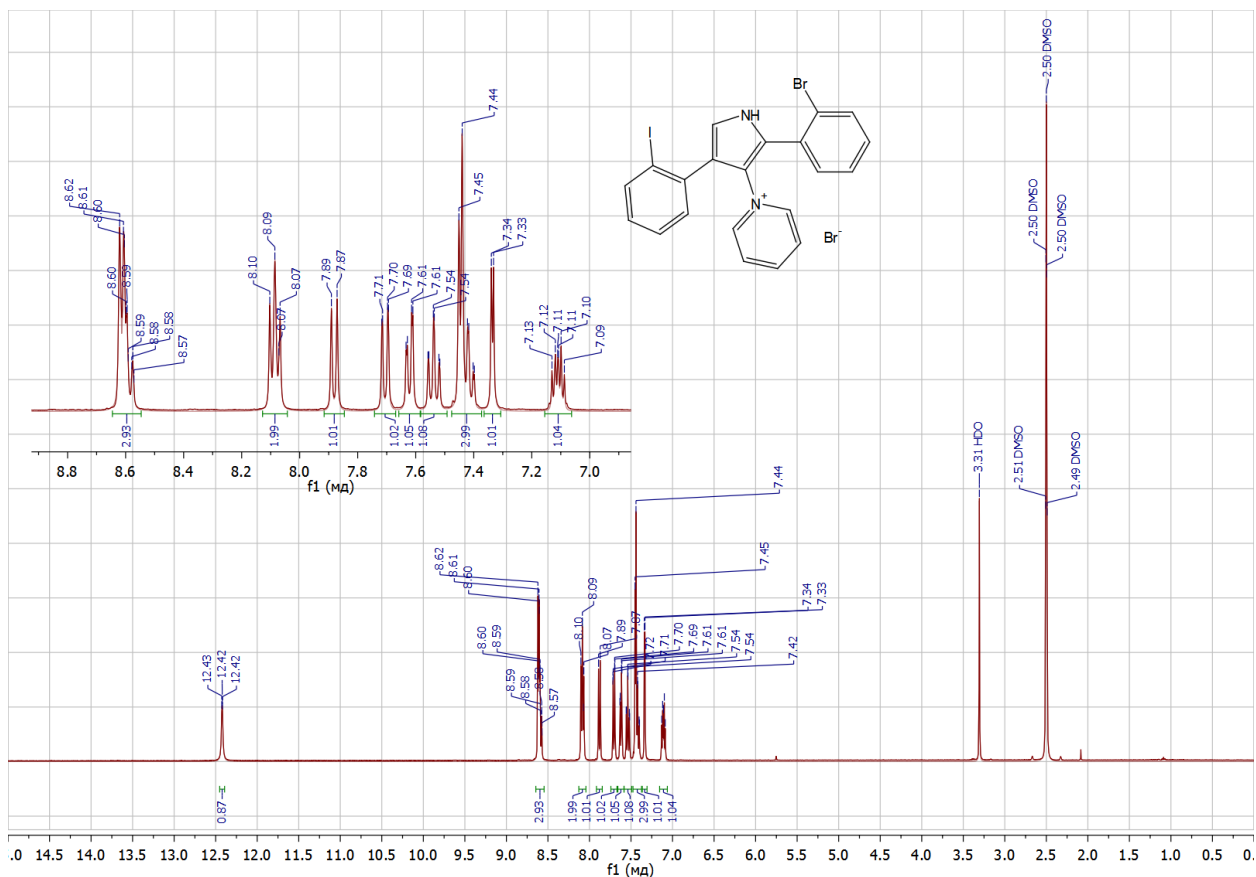

$^{13}\text{C}\{^1\text{H}\}$  NMR (101 MHz,  $\text{DMSO}-d_6$ ) of 1-(2-(2-bromophenyl)-4-(2-iodophenyl)-1*H*-pyrrol-3-yl)pyridin-1-ium bromide (**9**)

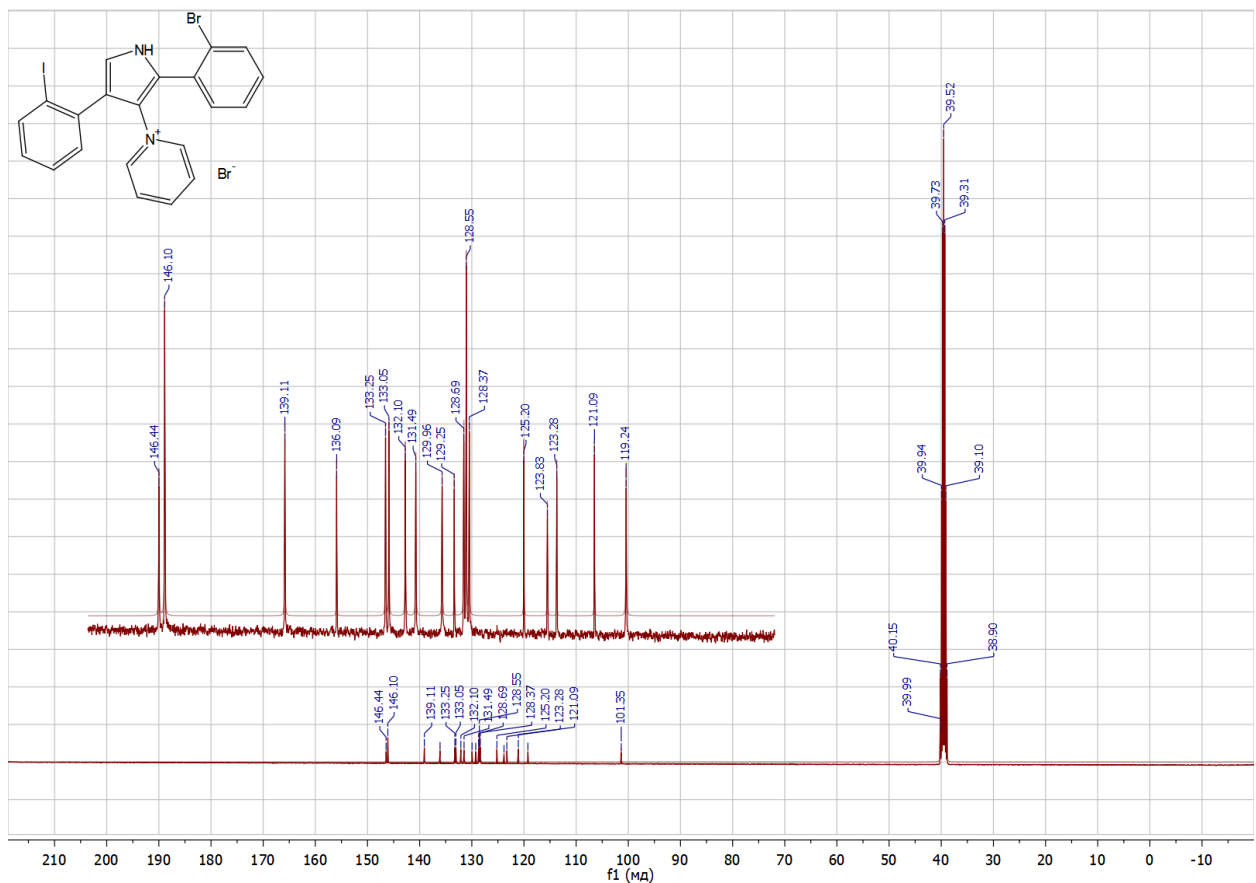

$^{13}\text{C}$  DEPT135 NMR (101 MHz,  $\text{DMSO-}d_6$ ) of 1-(2-(2-bromophenyl)-4-(2-iodophenyl)-1*H*-pyrrol-3-yl)pyridin-1-ium bromide (**9**)

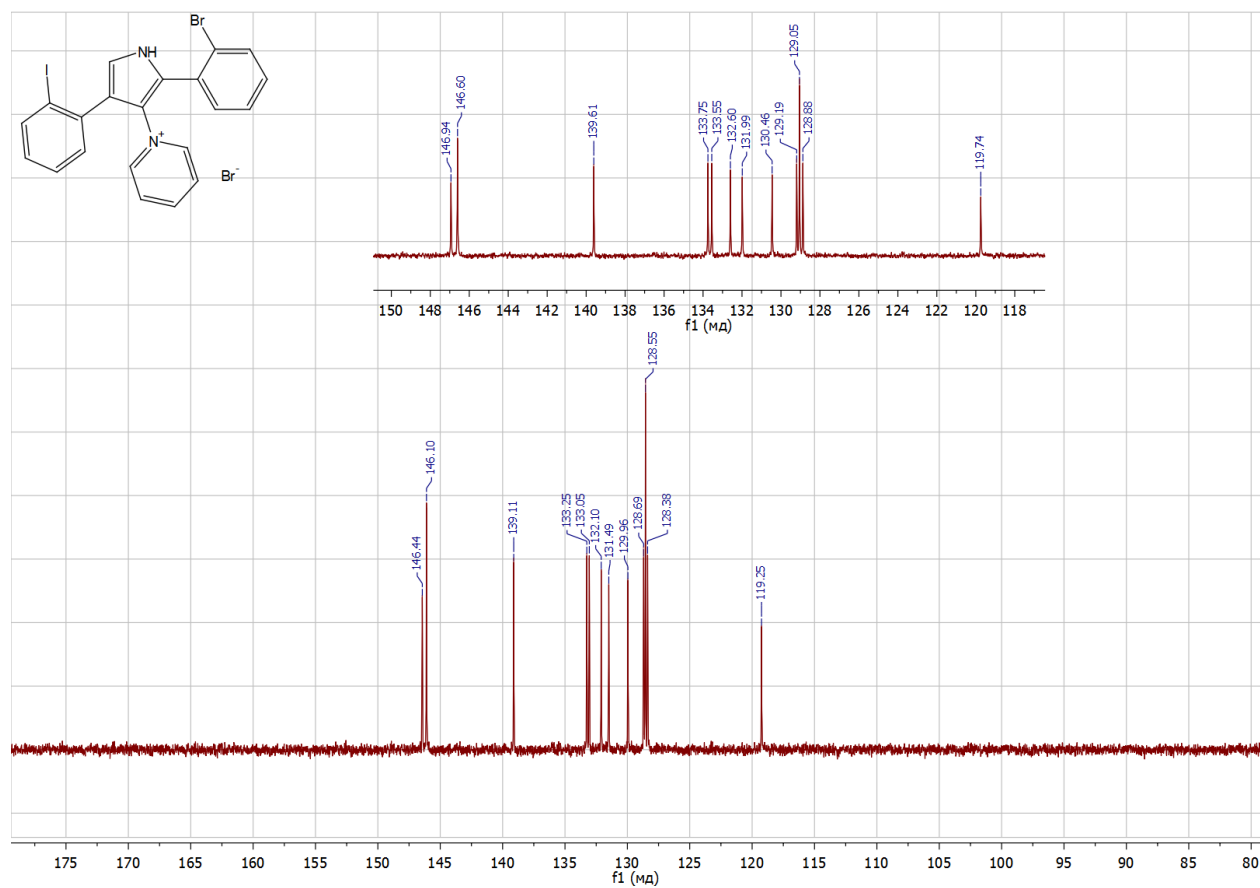

$^1\text{H}$  NMR (400 MHz,  $\text{DMSO}-d_6$ ) of 3-(2-bromophenyl)-2*H*-pyrido[2,1-*a*]pyrrolo[3,4-*c*]isoquinolin-4-ium bromide (**10**)

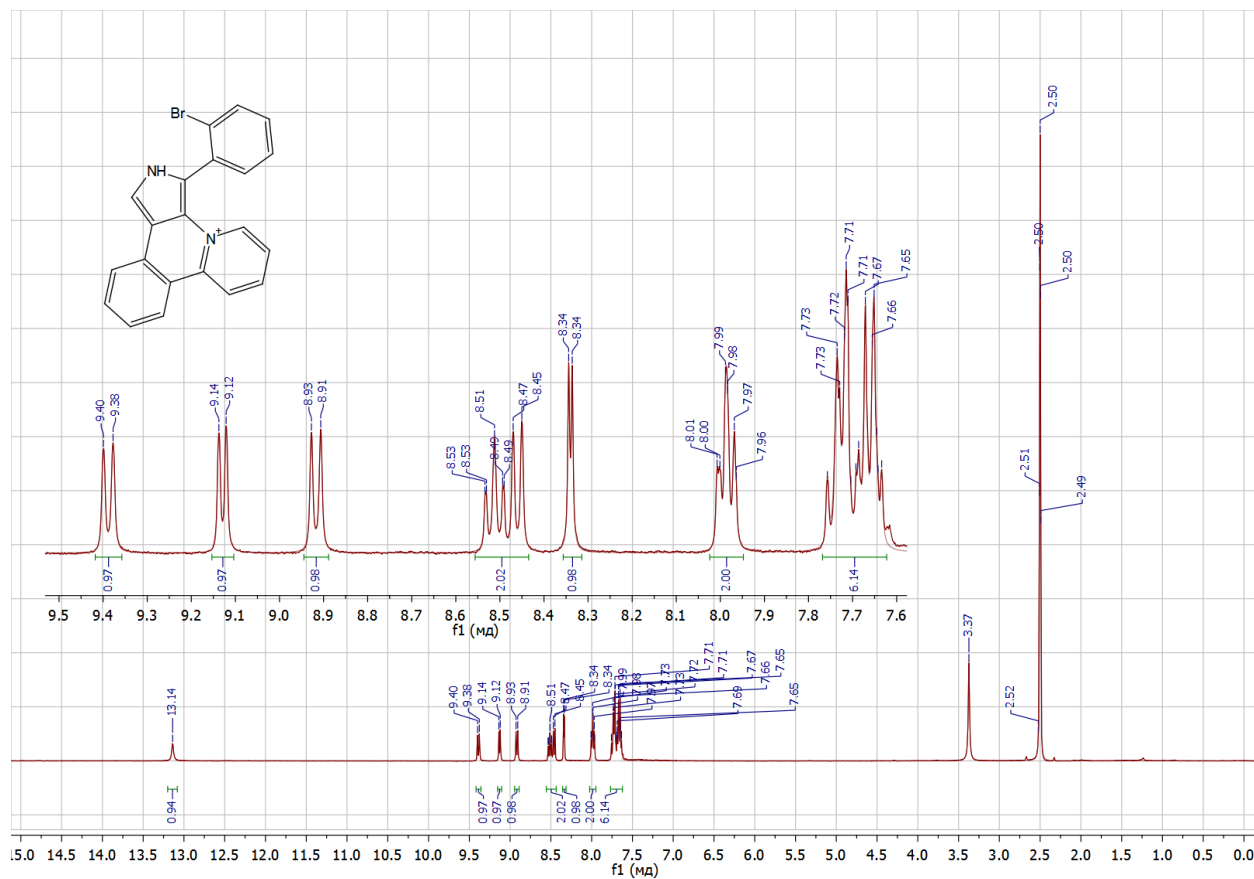

$^{13}\text{C}\{^1\text{H}\}$  NMR (101 MHz,  $\text{DMSO}-d_6$ ) of 3-(2-bromophenyl)-2*H*-pyrido[2,1-*a*]pyrrolo[3,4-*c*]isoquinolin-4-ium bromide (**10**)

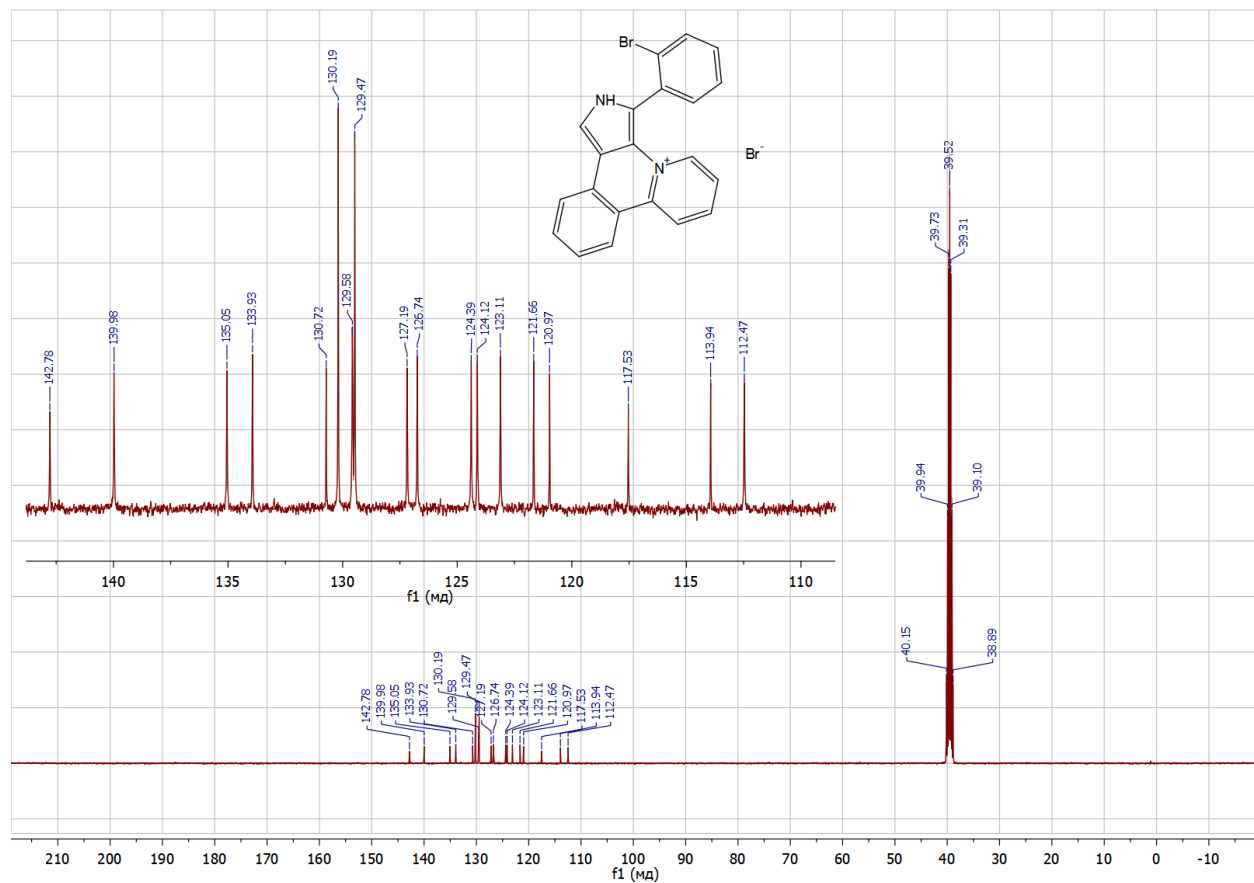

$^{13}\text{C}$  DEPT135 NMR (101 MHz,  $\text{DMSO}-d_6$ ) of 3-(2-bromophenyl)-2*H*-pyrido[2,1-*a*]pyrrolo[3,4-*c*]isoquinolin-4-ium bromide (**10**)

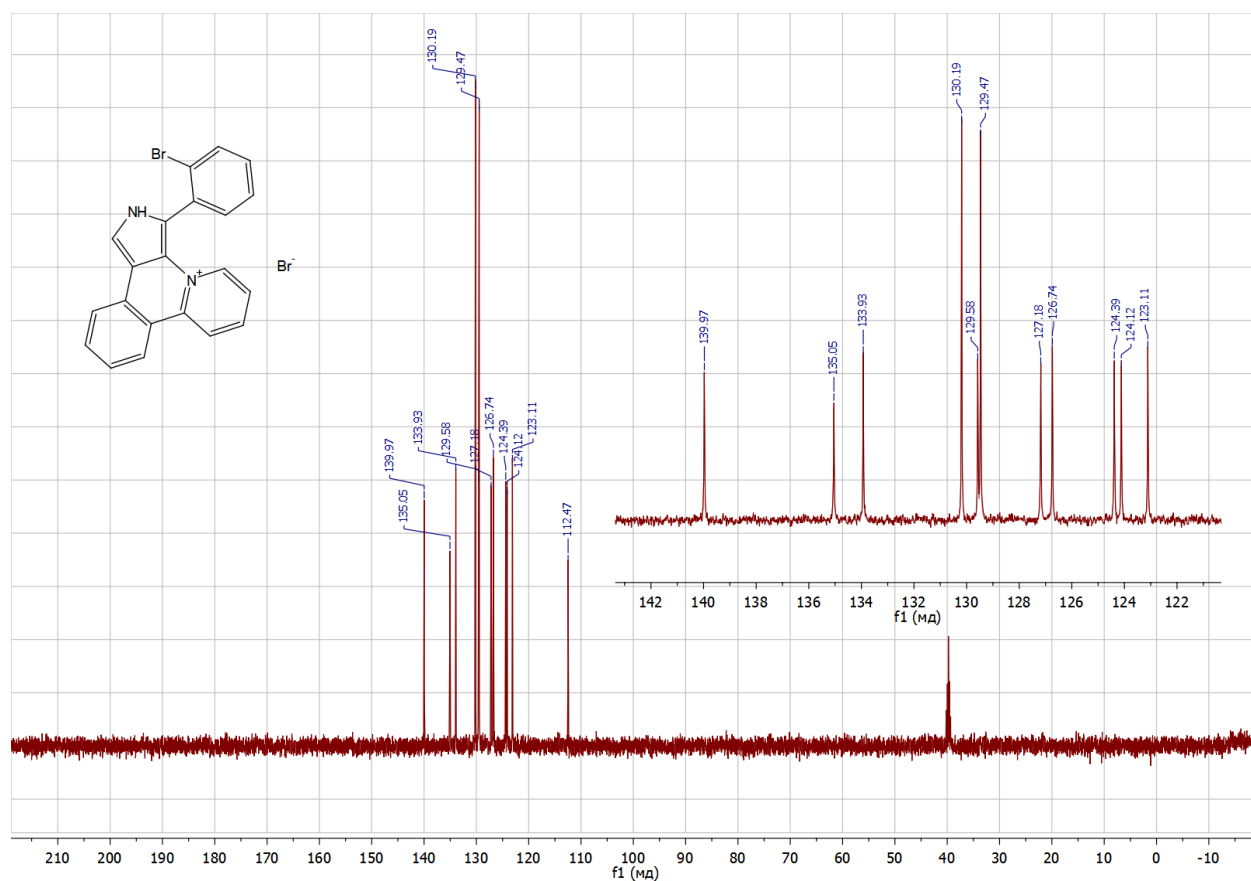

$^1\text{H}$  NMR (400 MHz,  $\text{DMSO}-d_6$ ) of 3-(2-bromophenyl)pyrido[2,1-*a*]pyrrolo[3,4-*c*]isoquinoline (**11**)

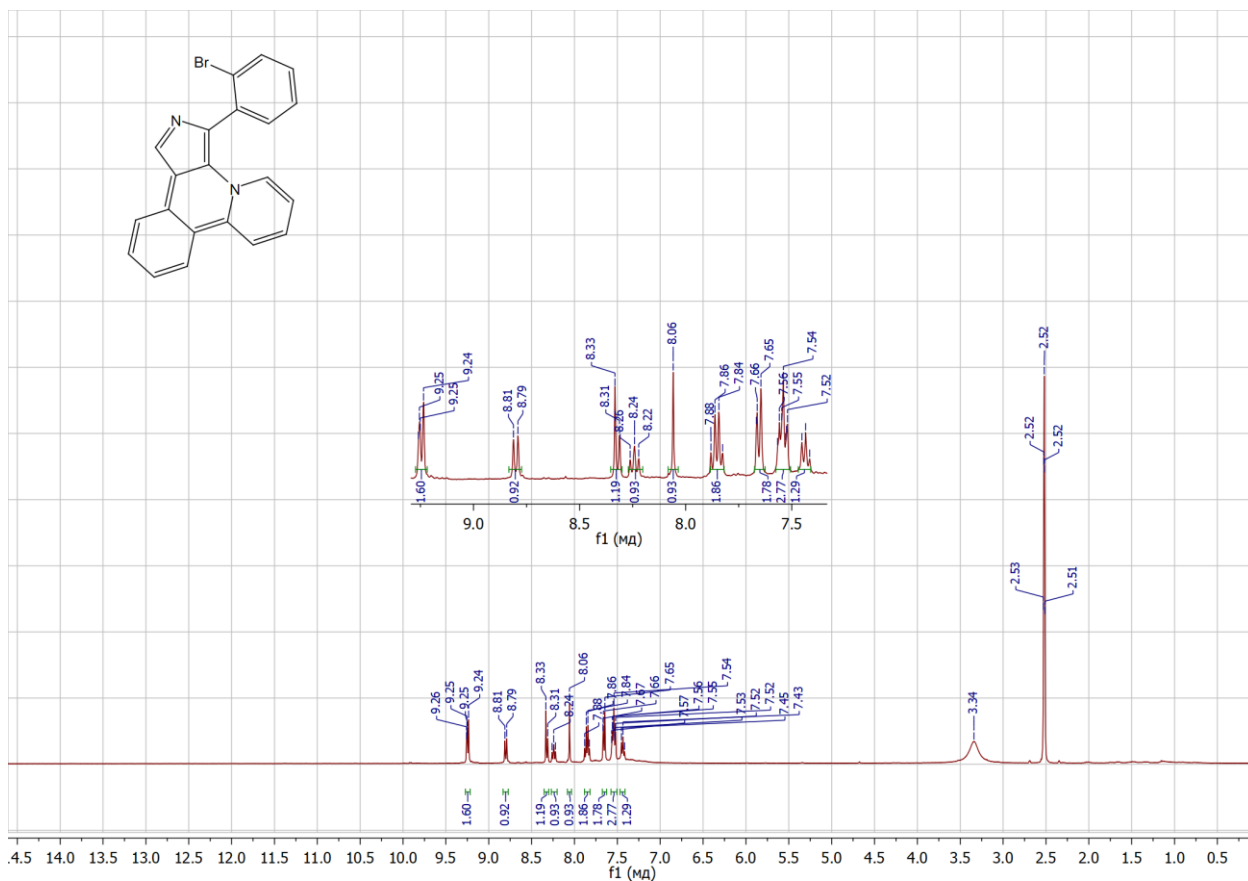

$^{13}\text{C}\{^1\text{H}\}$  NMR (101 MHz,  $\text{DMSO}-d_6$ ) of 3-(2-bromophenyl)pyrido[2,1-*a*]pyrrolo[3,4-*c*]isoquinoline (**11**)

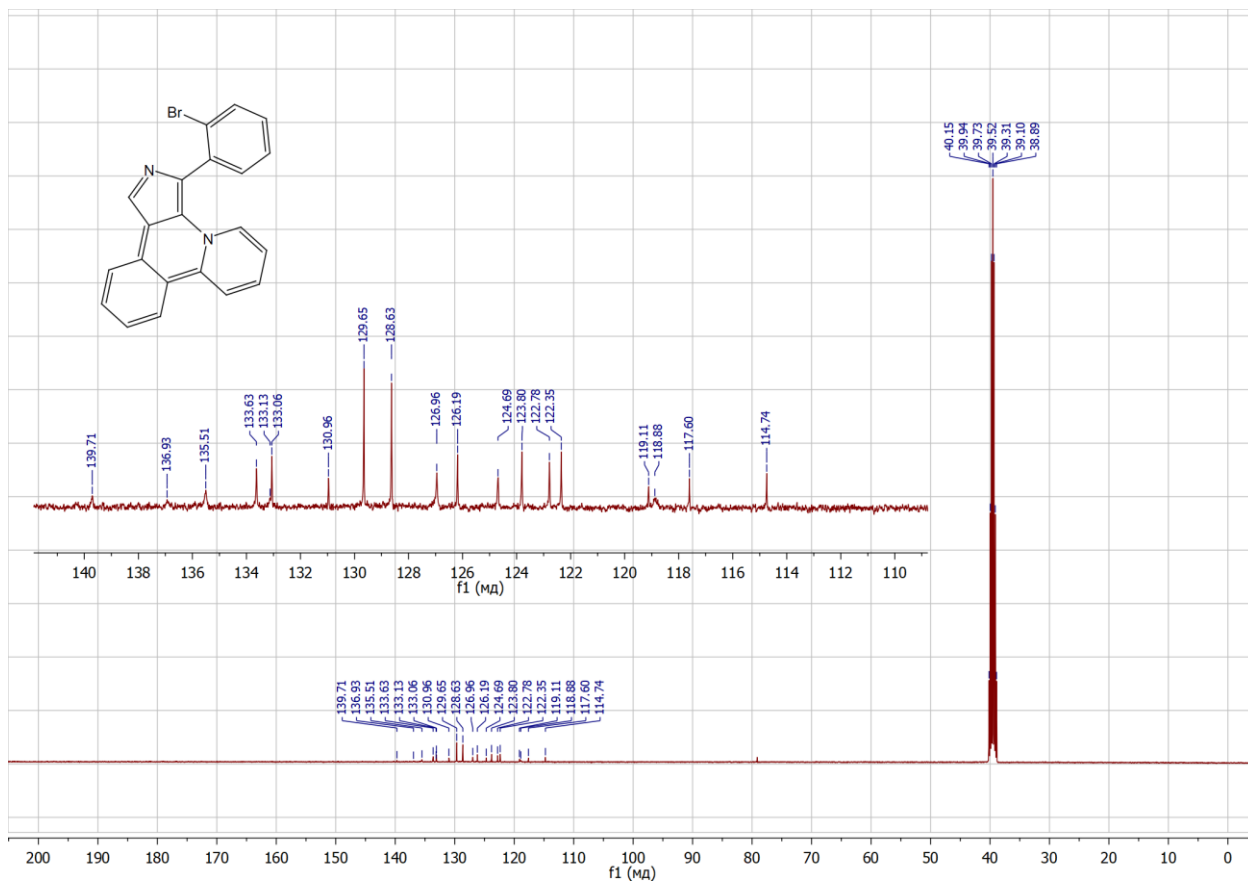

$^{13}\text{C}$  DEPT135 NMR (101 MHz,  $\text{DMSO}-d_6$ ) of 3-(2-bromophenyl)pyrido[2,1-*a*]pyrrolo[3,4-*c*]isoquinoline (**11**)

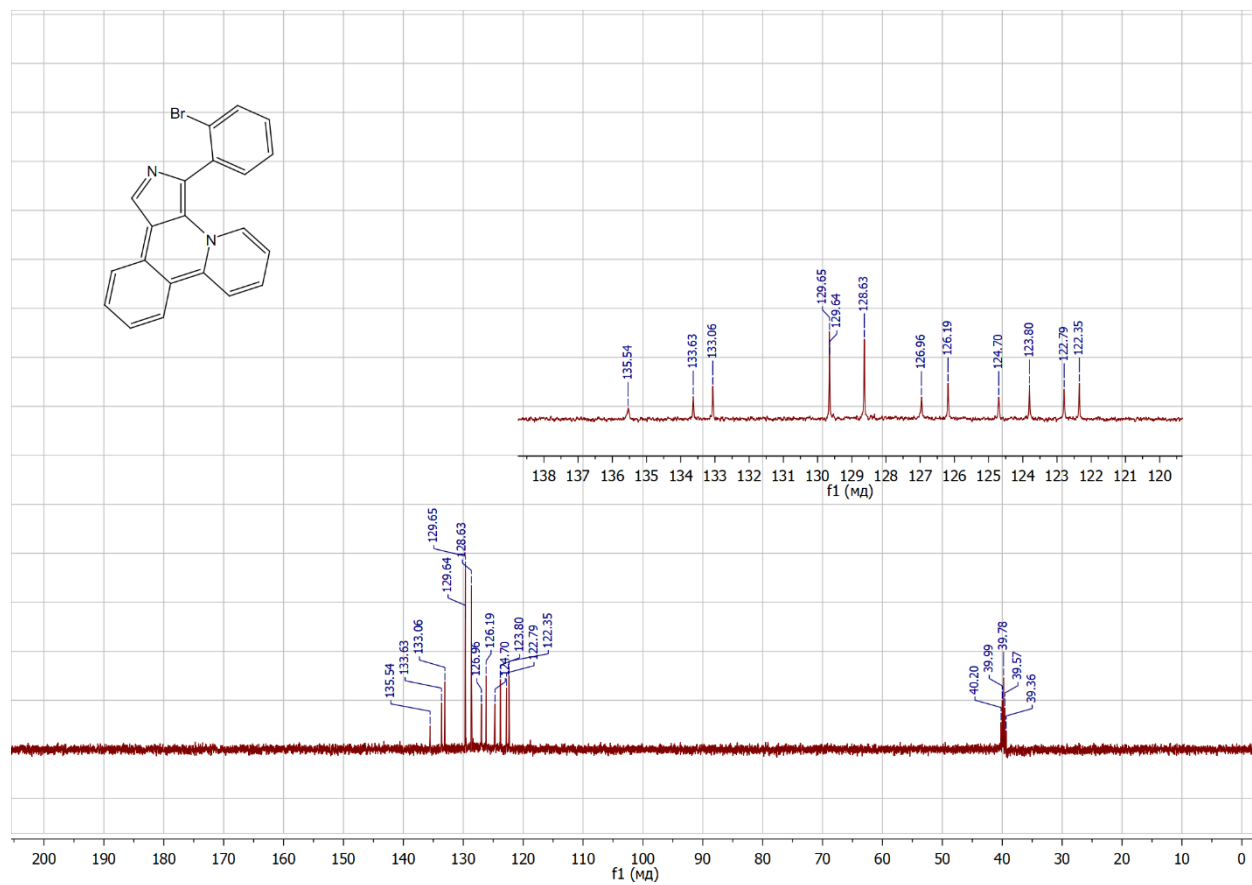

<sup>1</sup>H NMR (400 MHz, DMSO-*d*<sub>6</sub>) of 1-(2,4-bis(2-bromophenyl)-1*H*-pyrrol-3-yl)pyridin-1-ium bromide (**12**)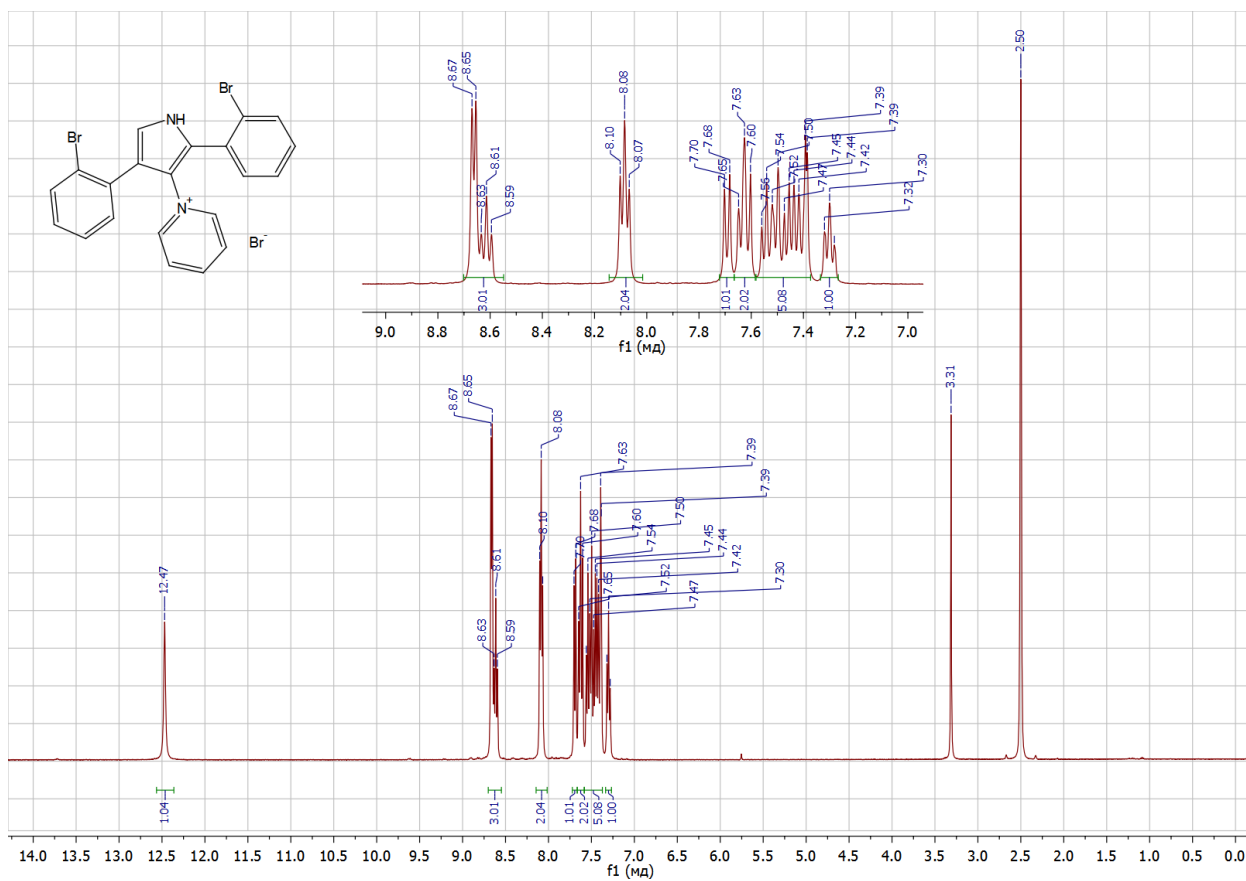<sup>13</sup>C{<sup>1</sup>H} NMR (101 MHz, DMSO-*d*<sub>6</sub>) of 1-(2,4-bis(2-bromophenyl)-1*H*-pyrrol-3-yl)pyridin-1-ium bromide (**12**)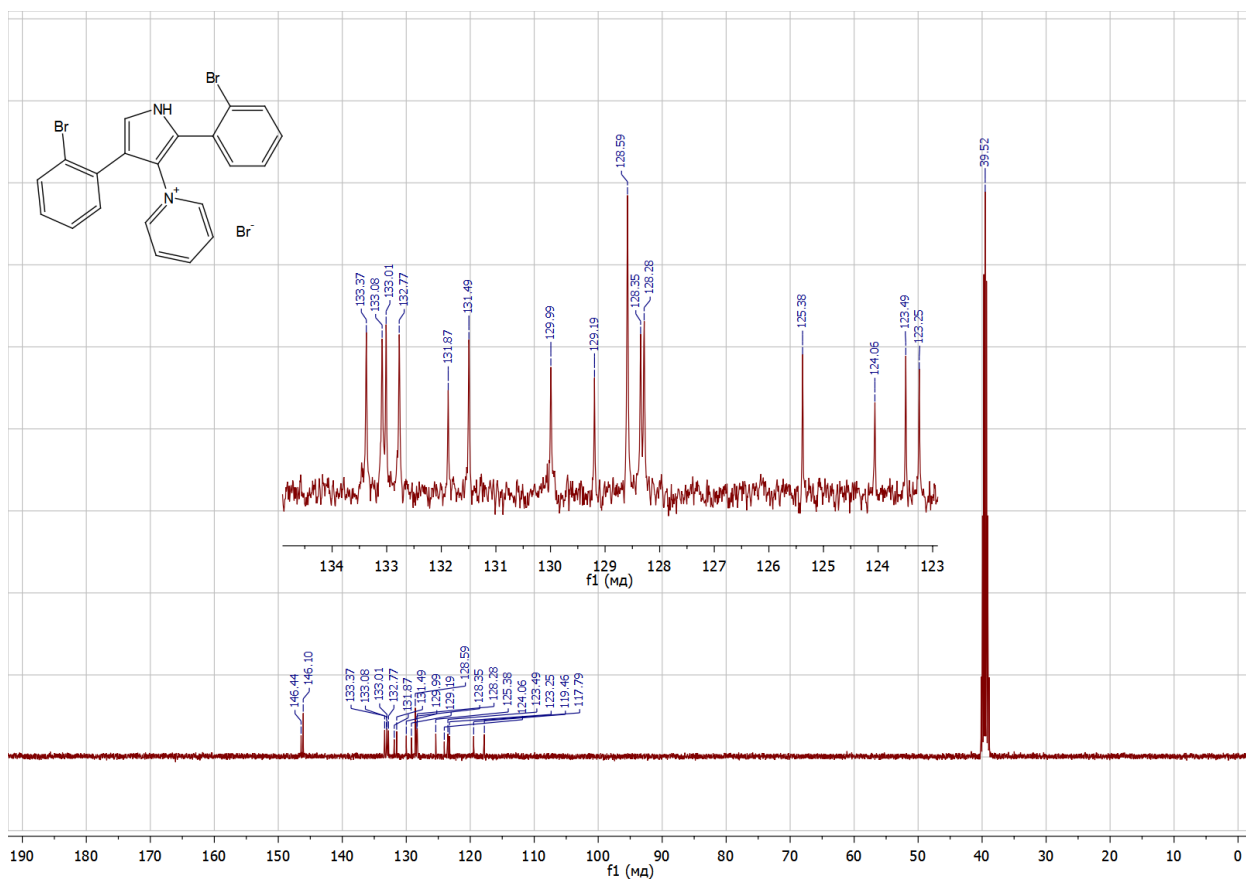

$^{13}\text{C}$  DEPT135 NMR (101 MHz,  $\text{DMSO-}d_6$ ) of 1-(2,4-bis(2-bromophenyl)-1*H*-pyrrol-3-yl)pyridin-1-ium bromide (**12**)

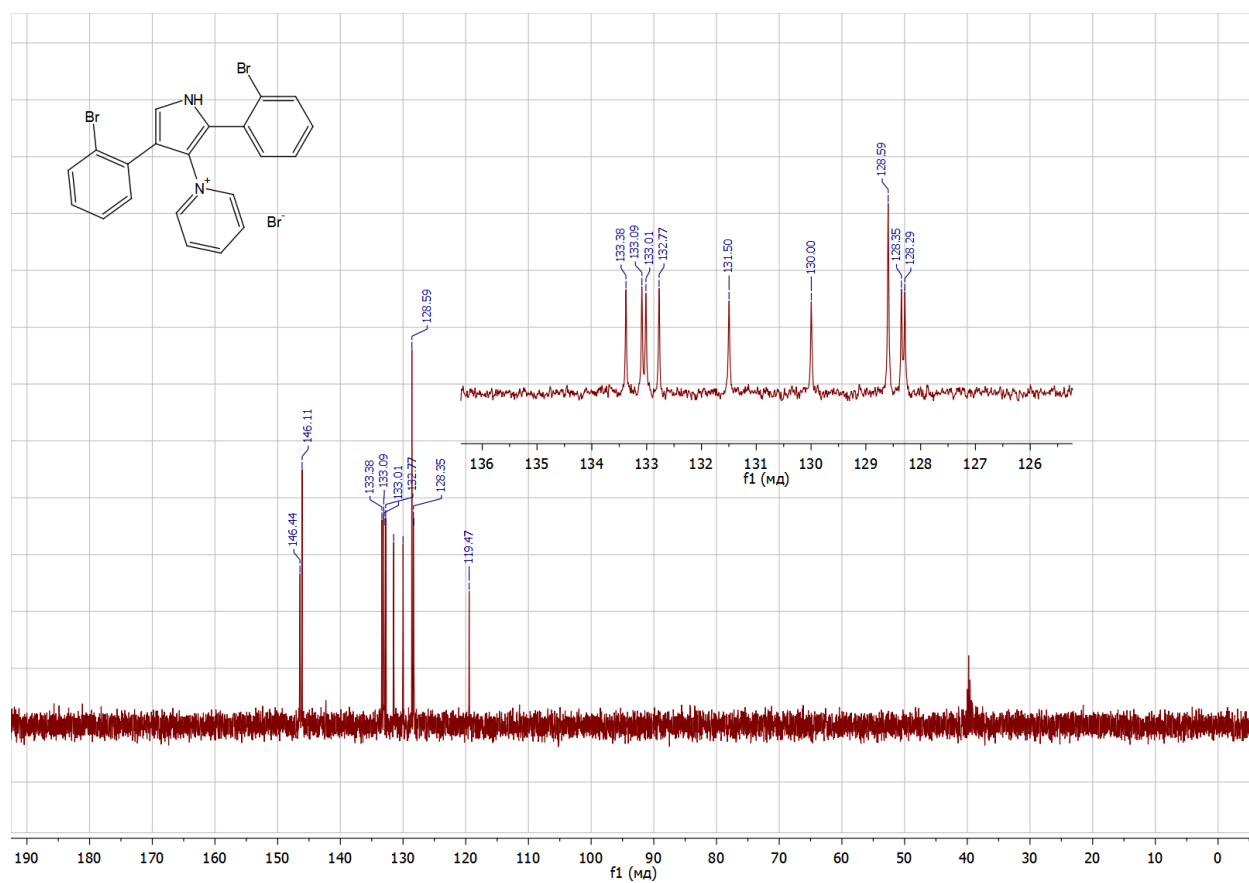



$^1\text{H}$  NMR (500 MHz,  $\text{DMSO-}d_6$ ) of dibenzo[b,g]pyrido[2,1,6-de]pyrrolo[2,3,4-ij]quinolizin-1-ium bromide (**13**)

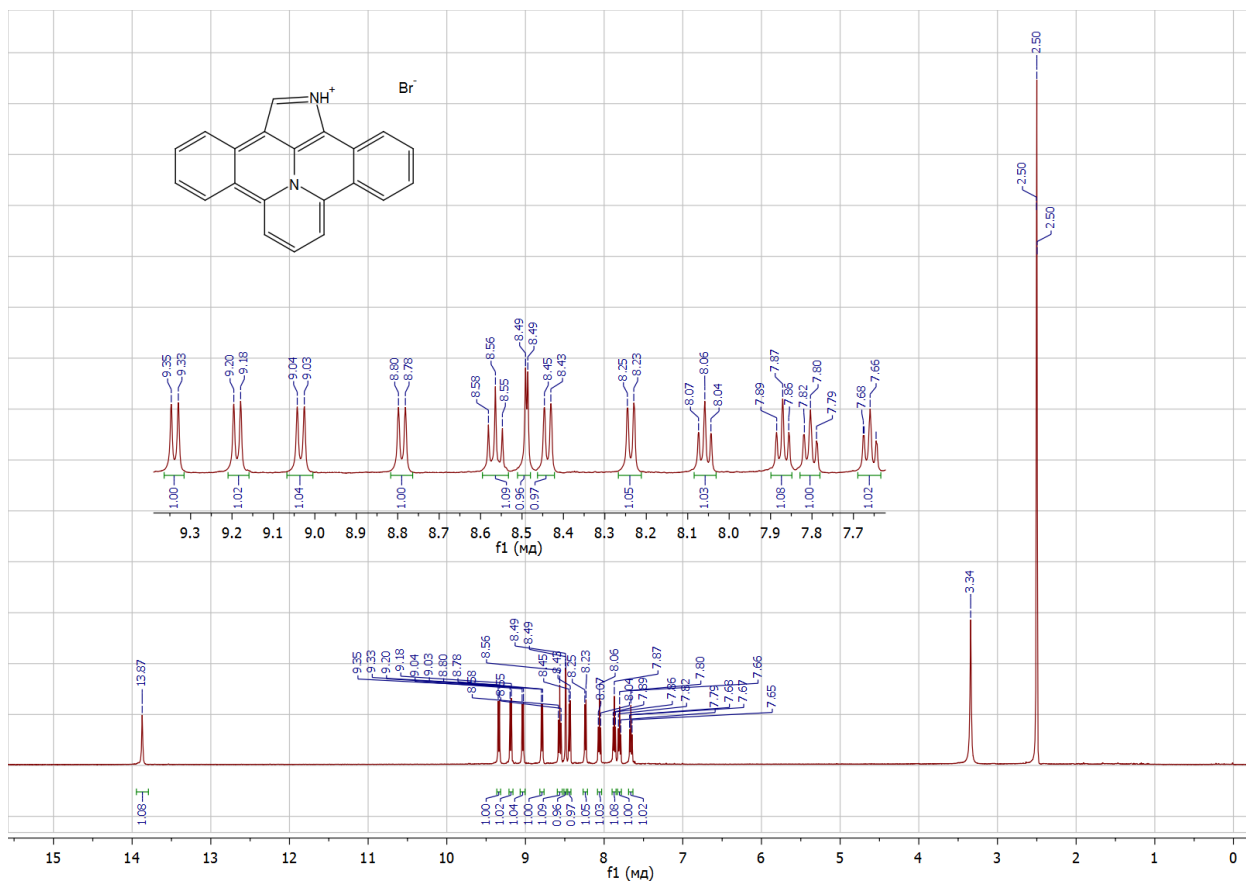

$^{13}\text{C}\{^1\text{H}\}$  NMR (126 MHz,  $\text{DMSO-}d_6$ ) of dibenzo[b,g]pyrido[2,1,6-de]pyrrolo[2,3,4-ij]quinolizin-1-ium bromide (**13**)

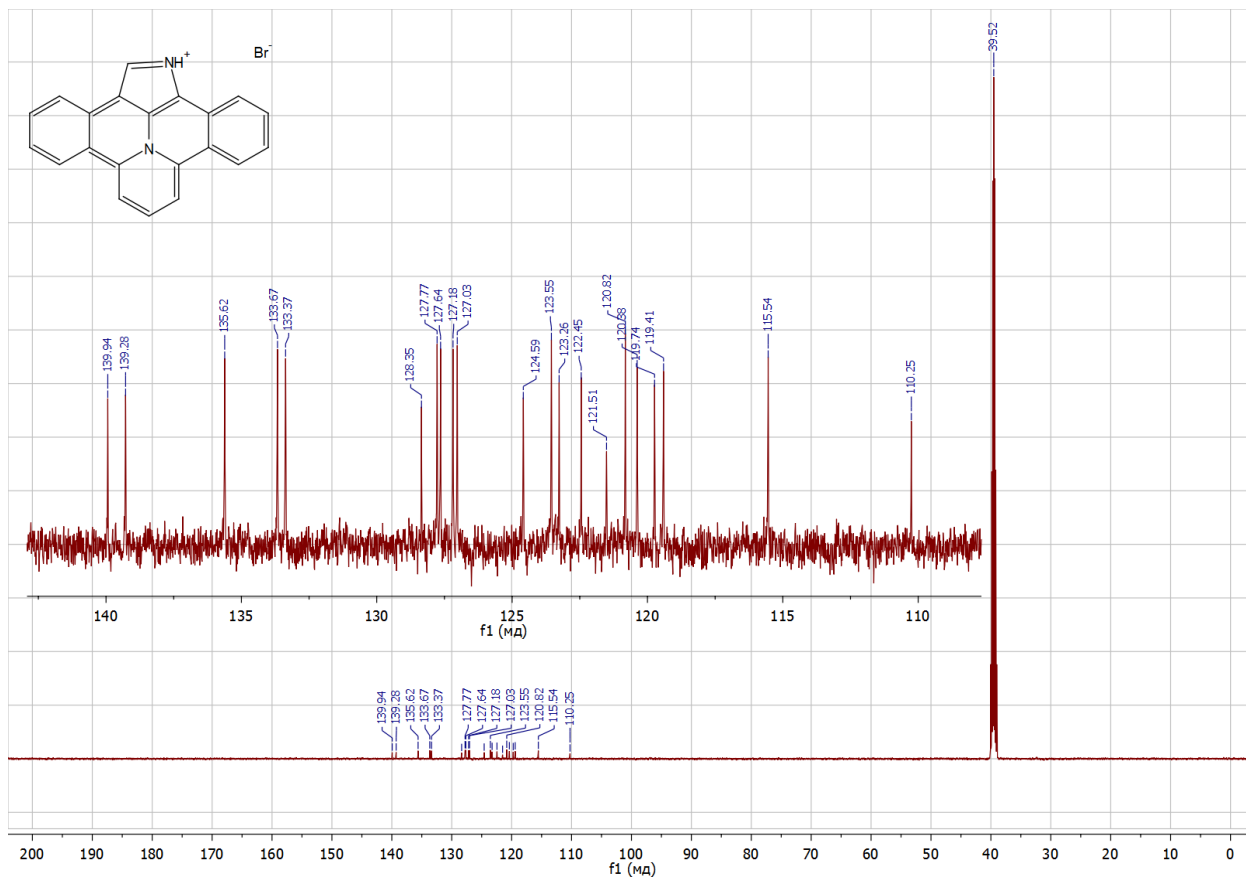

$^{13}\text{C}$  DEPT135 NMR (126 MHz,  $\text{DMSO}-d_6$ ) of dibenzo[b,g]pyrido[2,1,6-de]pyrrolo[2,3,4-ij]quinolizin-1-ium bromide (**13**)

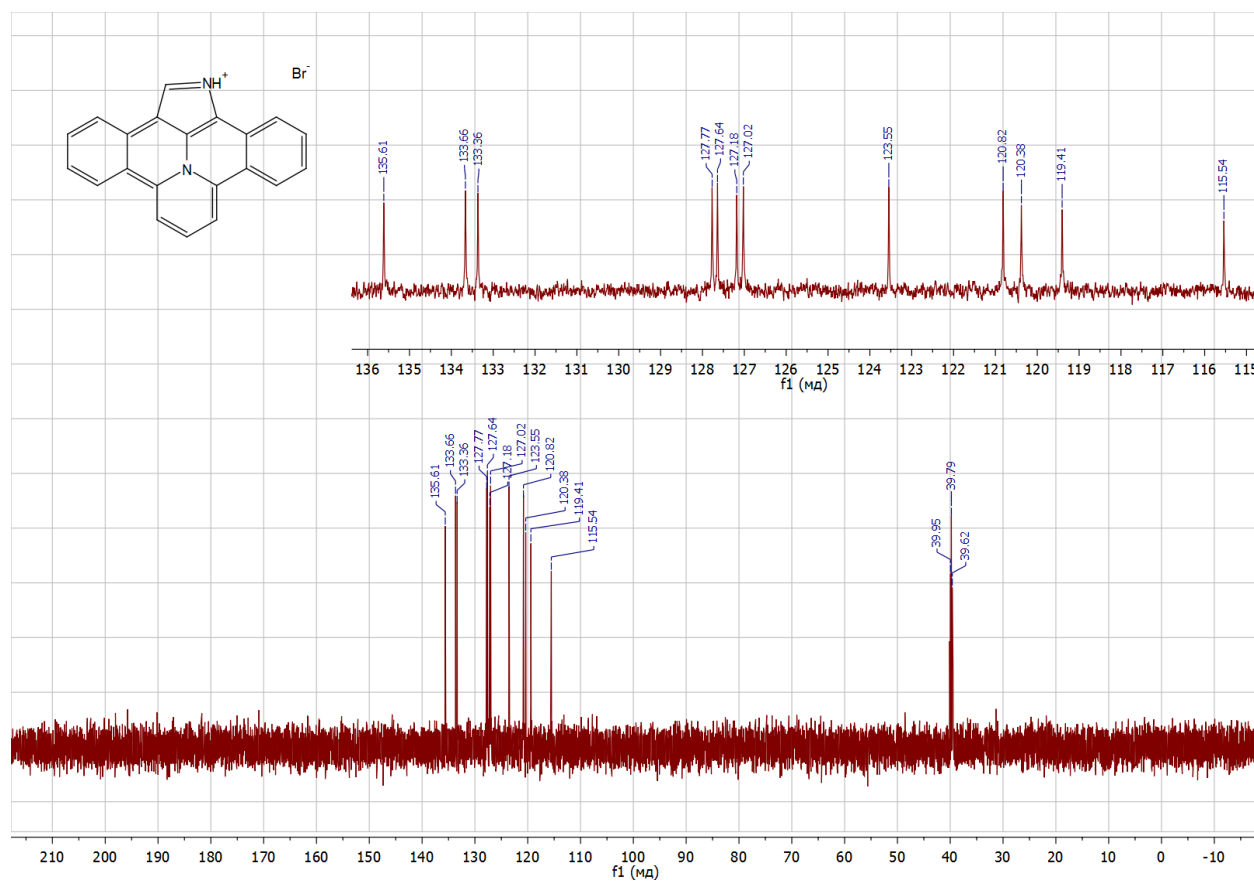

$^1\text{H}$  NMR (400 MHz,  $\text{DMSO}-d_6$ ) of dibenzo[b,g]pyrido[2,1,6-de]pyrrolo[2,3,4-ij]quinoline (**14**)

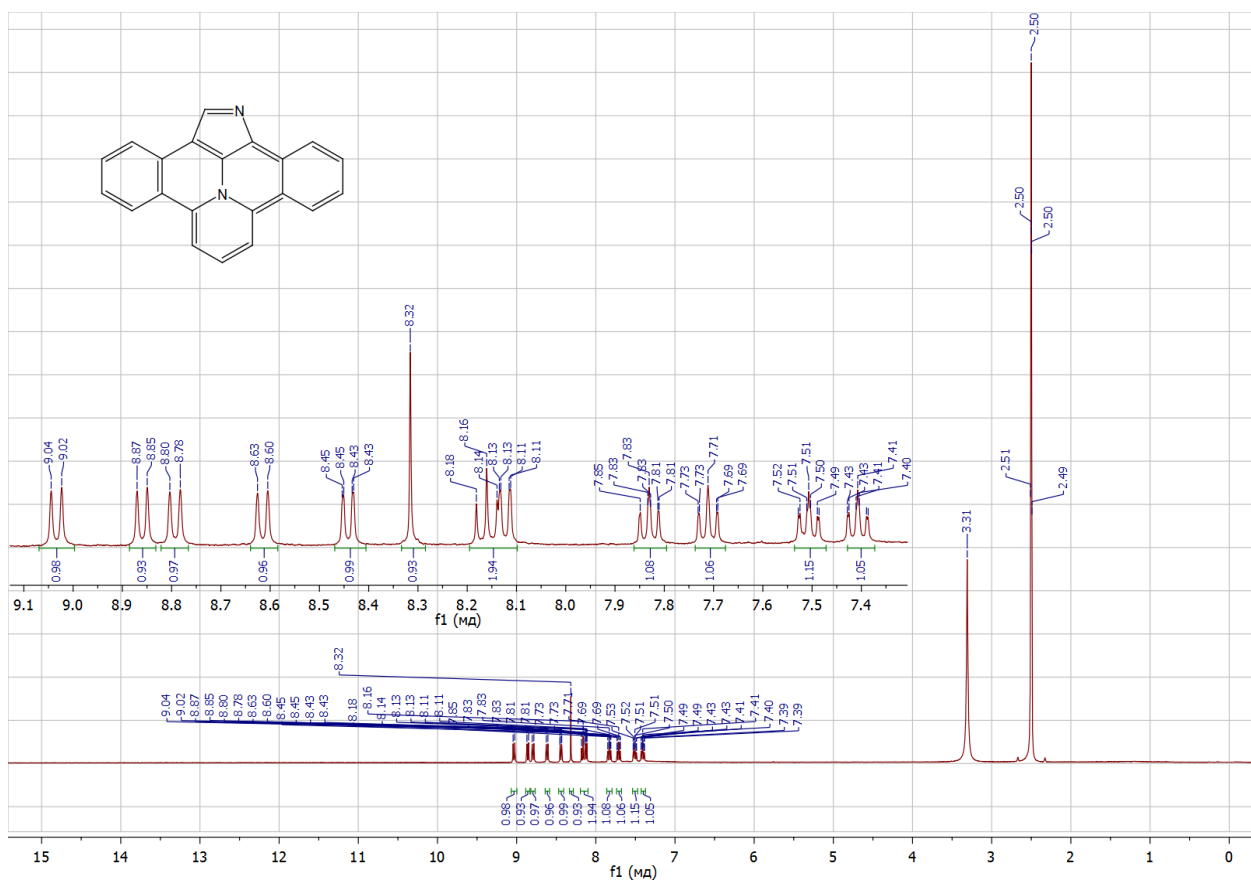

$^{13}\text{C}\{^1\text{H}\}$  NMR (101 MHz,  $\text{DMSO}-d_6$ ) of dibenzo[b,g]pyrido[2,1,6-de]pyrrolo[2,3,4-ij]quinoline (**14**)

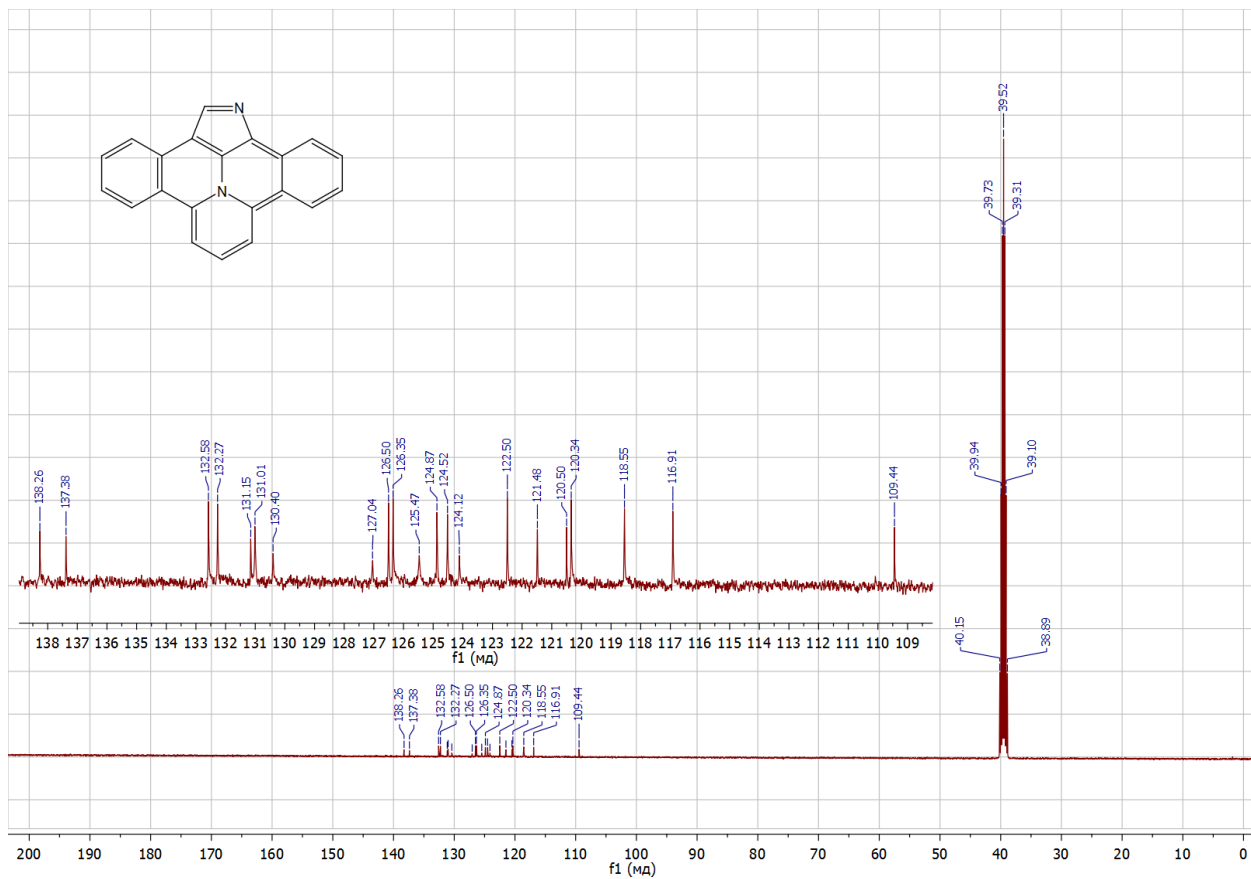

$^{13}\text{C}$  DEPT135 NMR (101 MHz,  $\text{DMSO}-d_6$ ) of dibenzo[b,g]pyrido[2,1,6-de]pyrrolo[2,3,4-ij]quinoline (**14**)

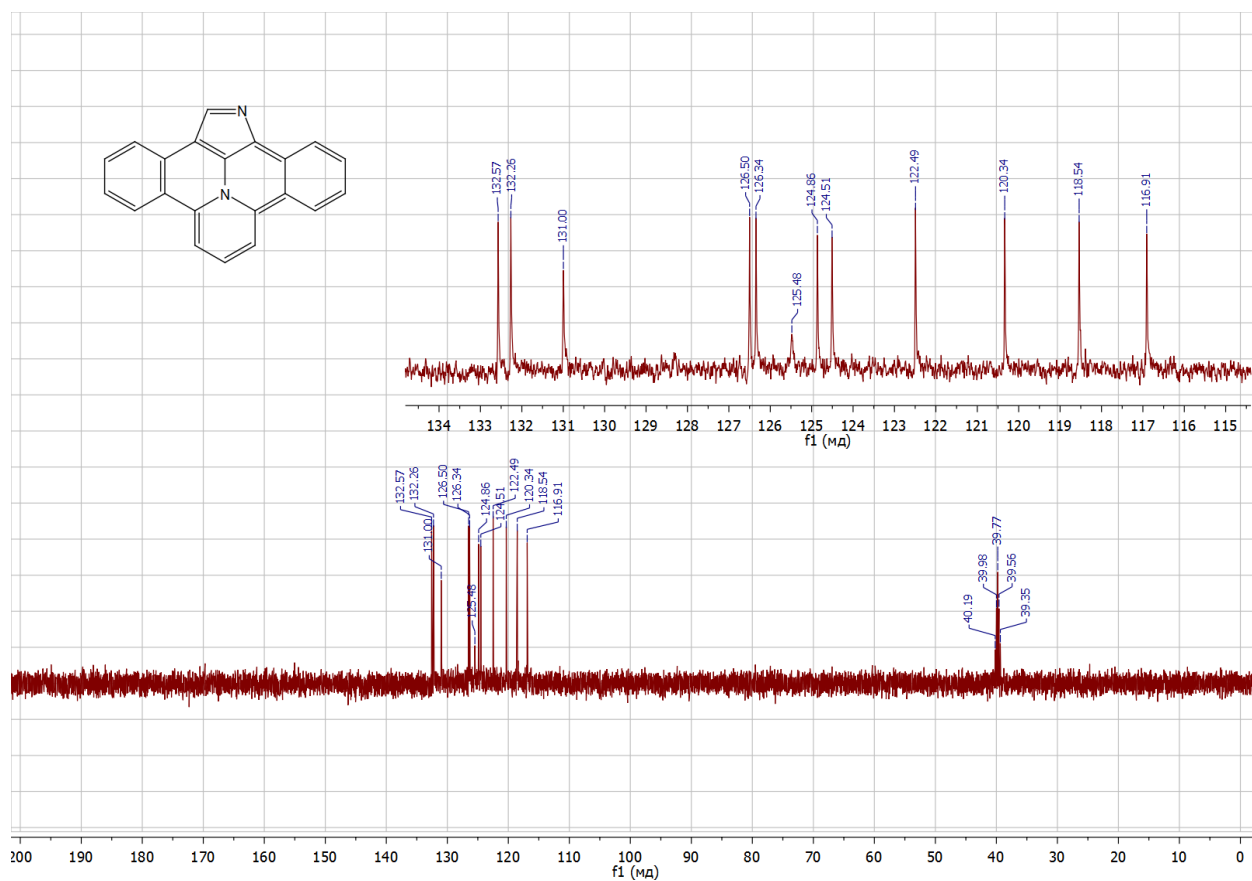

$^1\text{H}$  NMR (400 MHz,  $\text{DMSO-}d_6$ ) of 1-(2-(2-bromophenyl)-2-oxoethyl)-4-methylpyridin-1-ium bromide (**15b**)

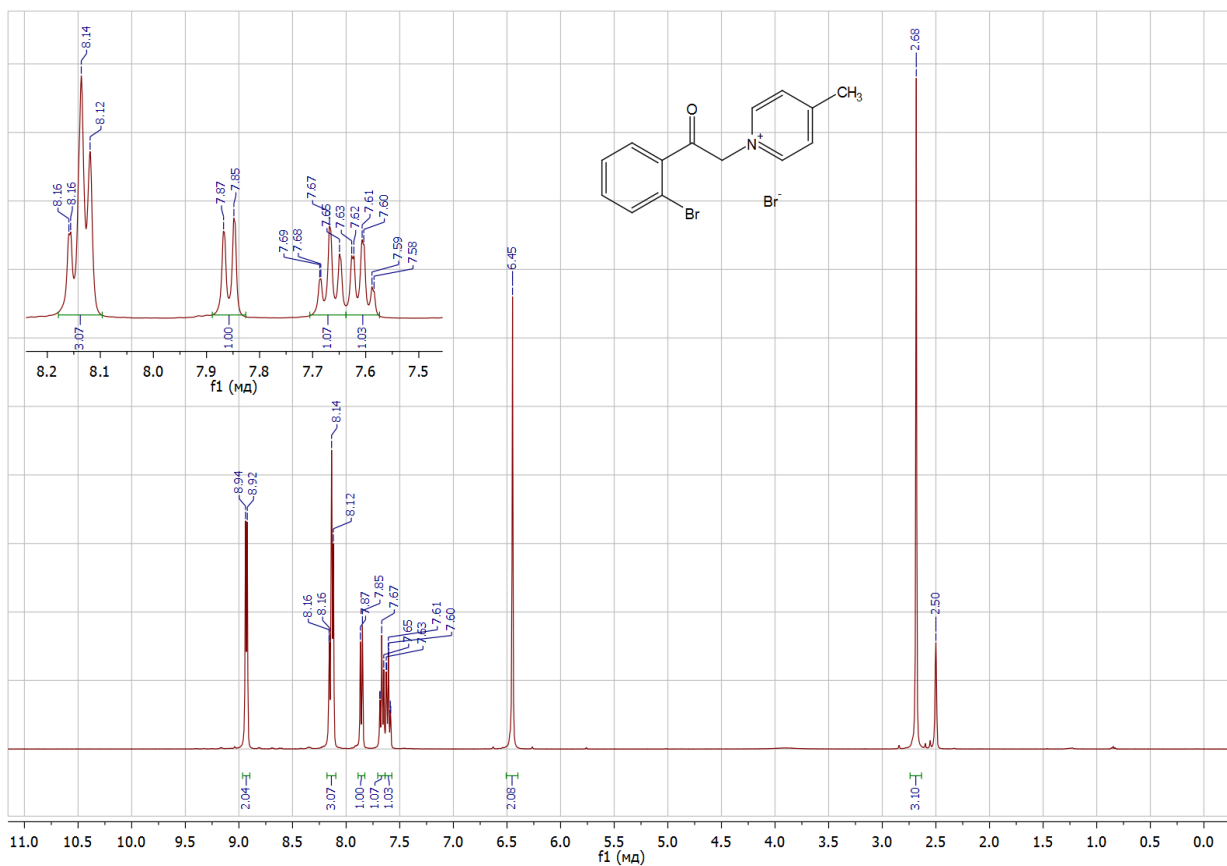

$^{13}\text{C}\{^1\text{H}\}$  NMR (101 MHz,  $\text{DMSO-}d_6$ ) of 1-(2-(2-bromophenyl)-2-oxoethyl)-4-methylpyridin-1-ium bromide (**15b**)

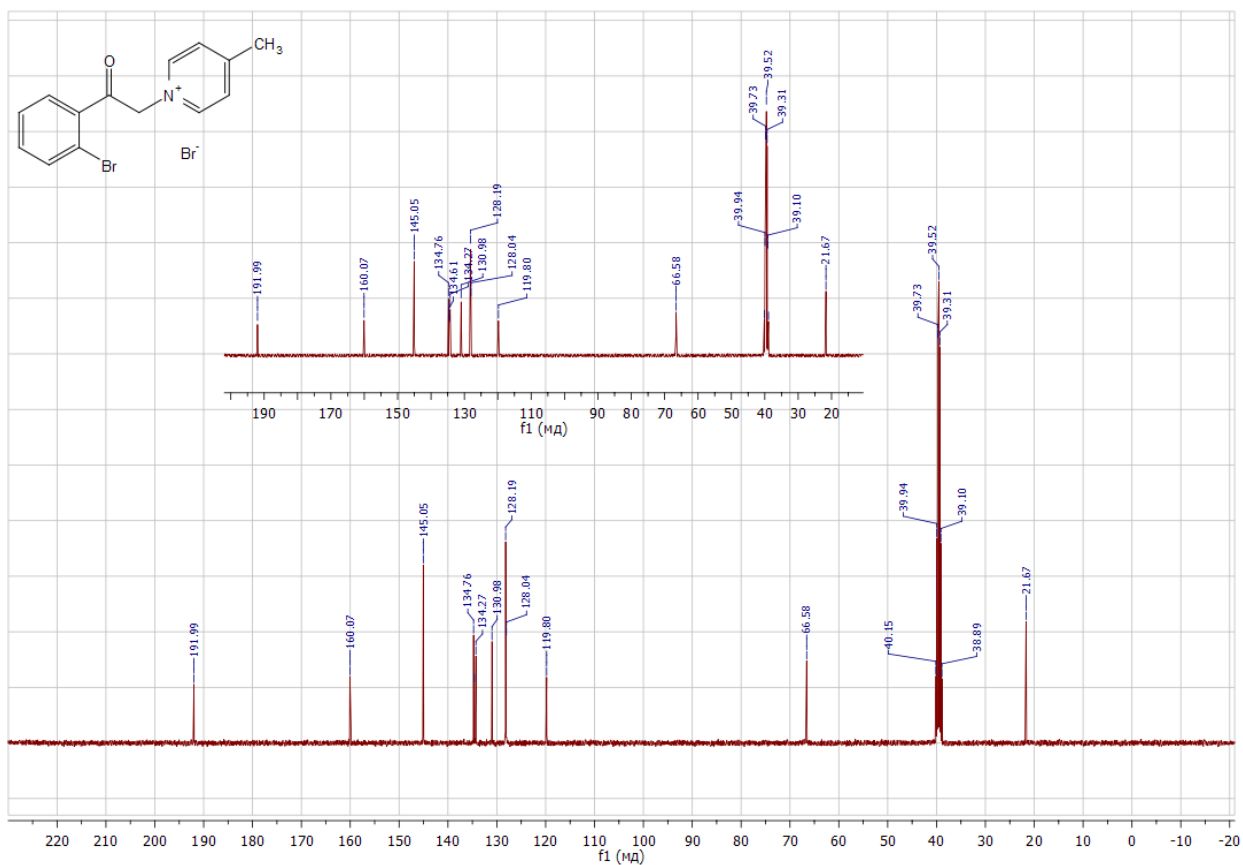

$^{13}\text{C}$  DEPT135 NMR (101 MHz,  $\text{DMSO-}d_6$ ) of 1-(2-(2-bromophenyl)-2-oxoethyl)-4-methylpyridin-1-ium bromide (**15b**)

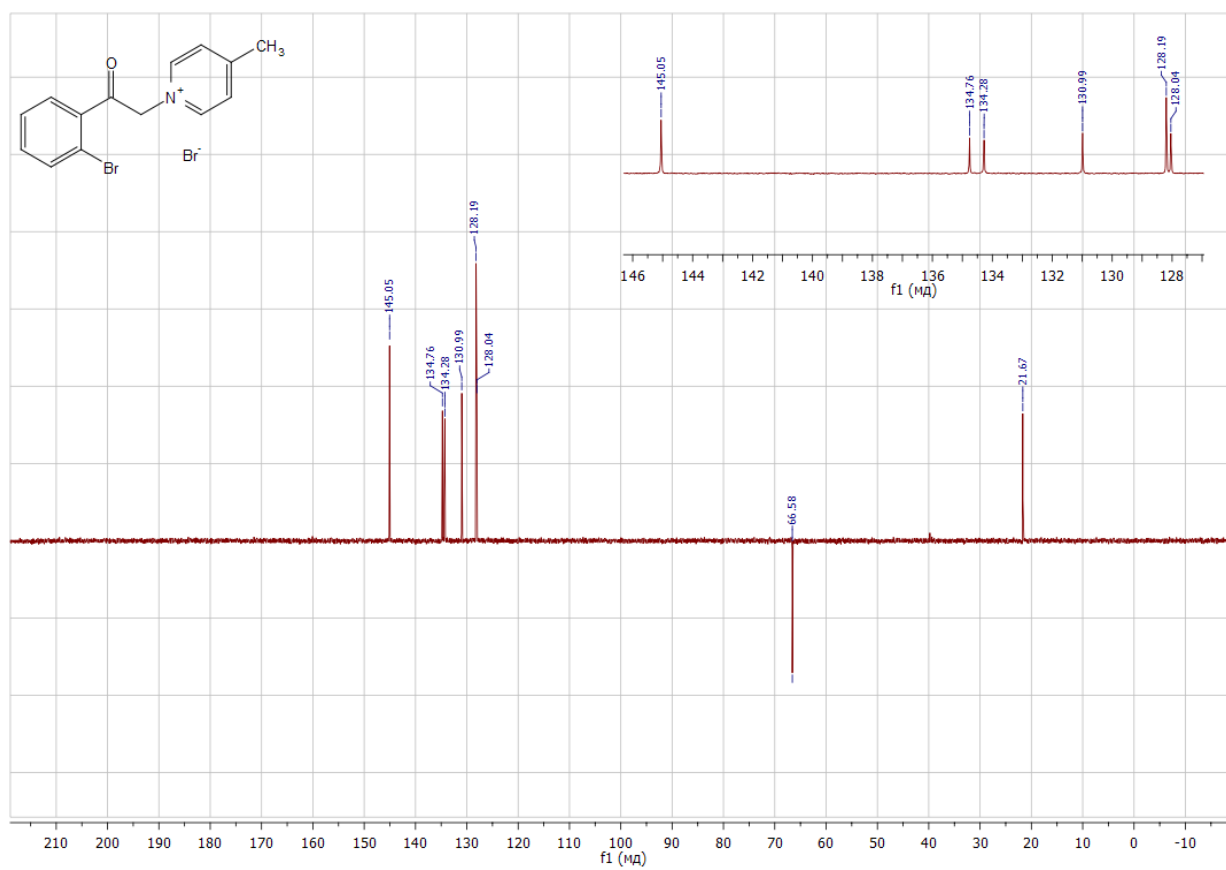

$^1\text{H}$  NMR (400 MHz,  $\text{DMSO-}d_6$ ) of 1-(2-(2-bromophenyl)-2-oxoethyl)-4-(4-methoxyphenyl)pyridin-1-ium bromide (**15e**)

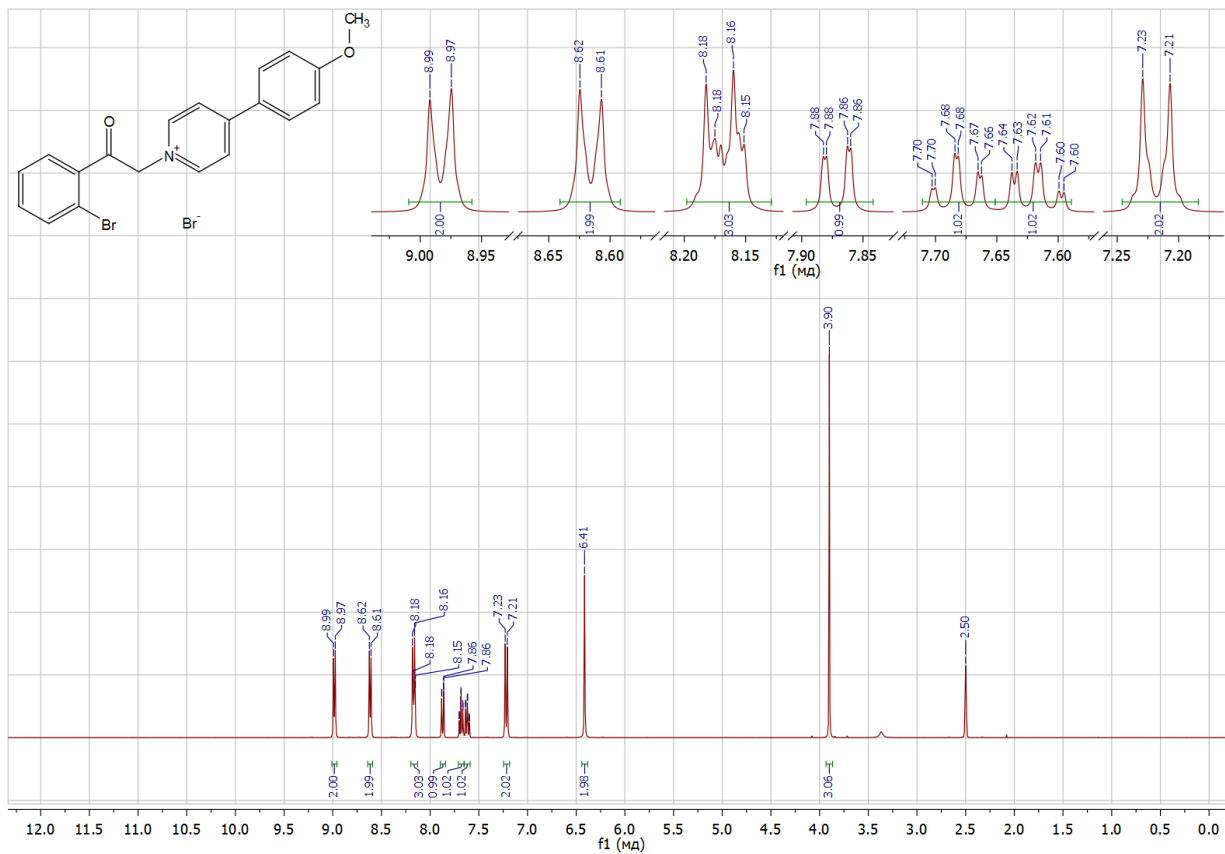

$^{13}\text{C}\{^1\text{H}\}$  NMR (101 MHz,  $\text{DMSO-}d_6$ ) of 1-(2-(2-bromophenyl)-2-oxoethyl)-4-(4-methoxyphenyl)pyridin-1-ium bromide (**15e**)

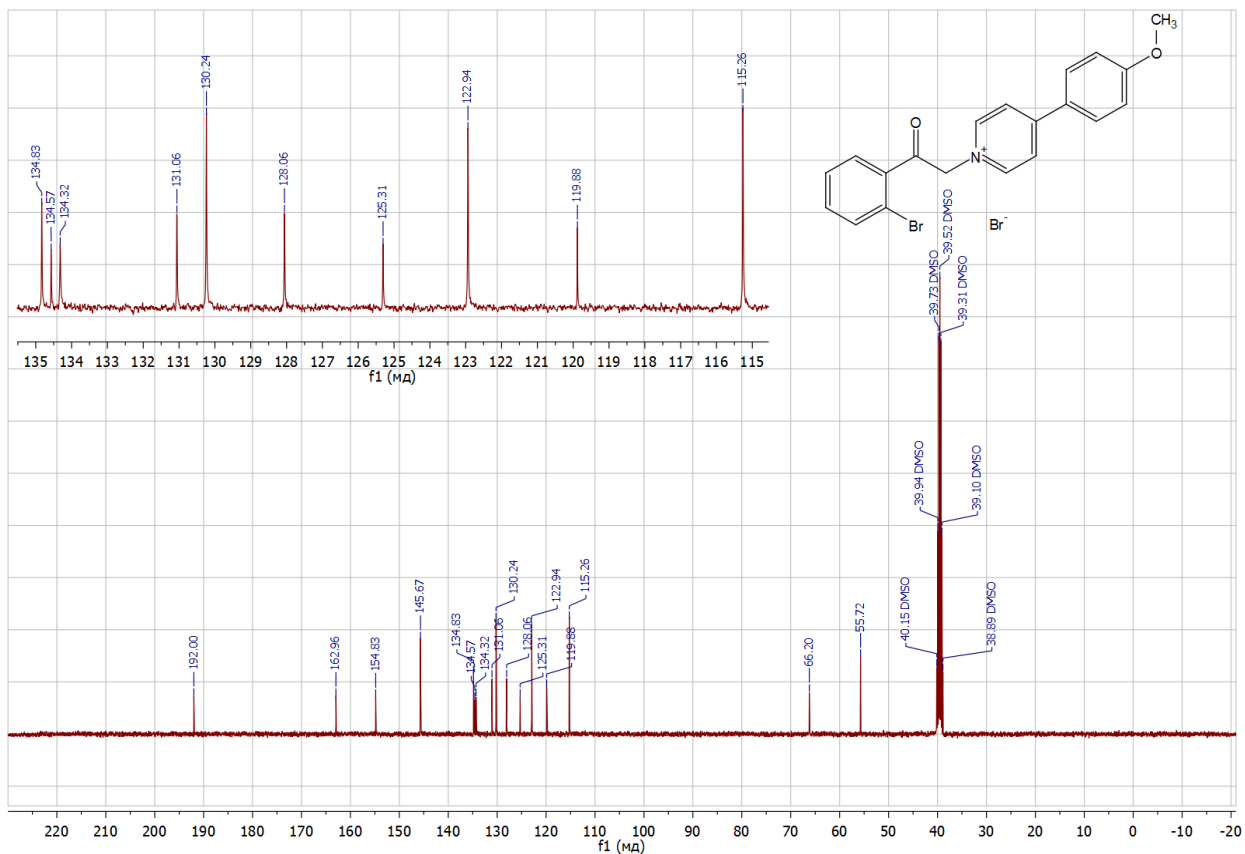

$^{13}\text{C}$  DEPT135 NMR (101 MHz,  $\text{DMSO}-d_6$ ) of 1-(2-(2-bromophenyl)-2-oxoethyl)-4-(4-methoxyphenyl)pyridin-1-ium bromide (**15e**)

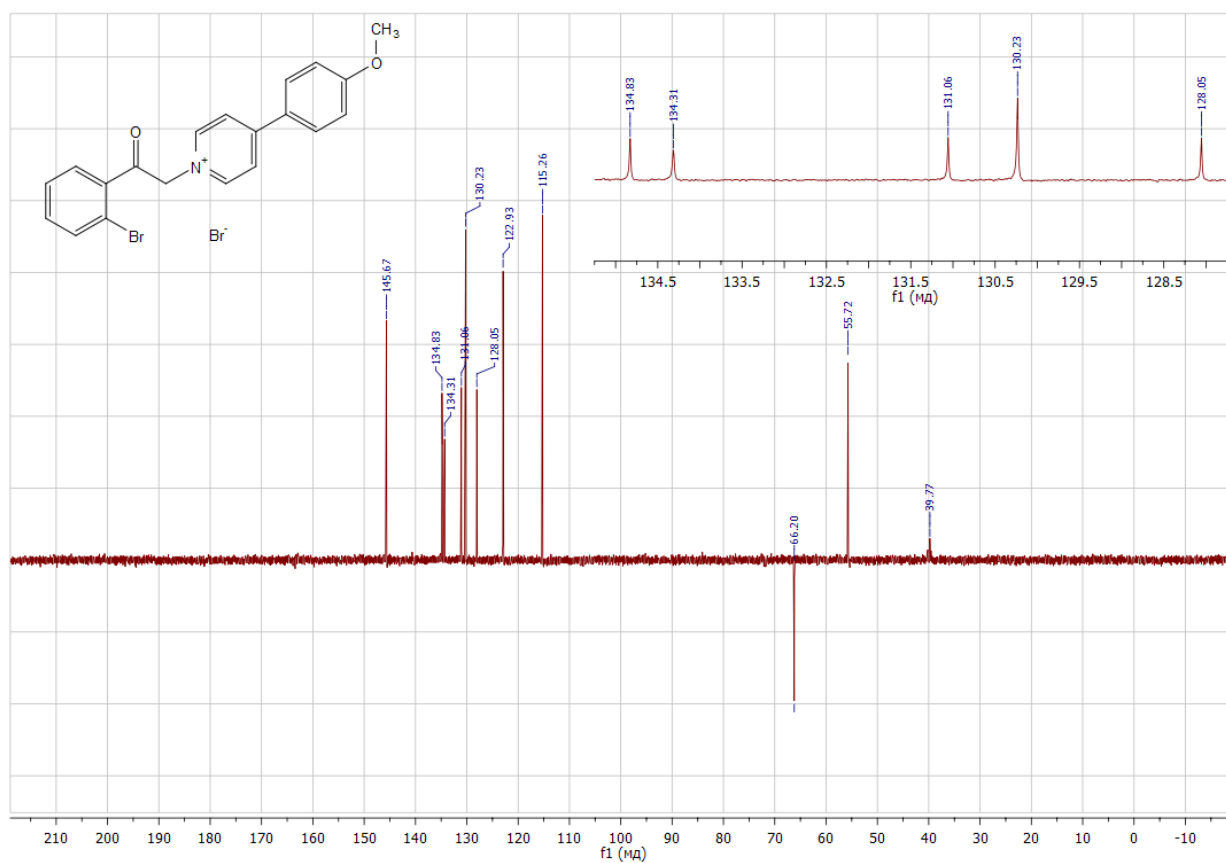



$^1\text{H}$  NMR (400 MHz,  $\text{DMSO-}d_6$ ) of 2-(2-(2-bromophenyl)-2-oxoethyl)isoquinolin-2-ium bromide (**15g**)

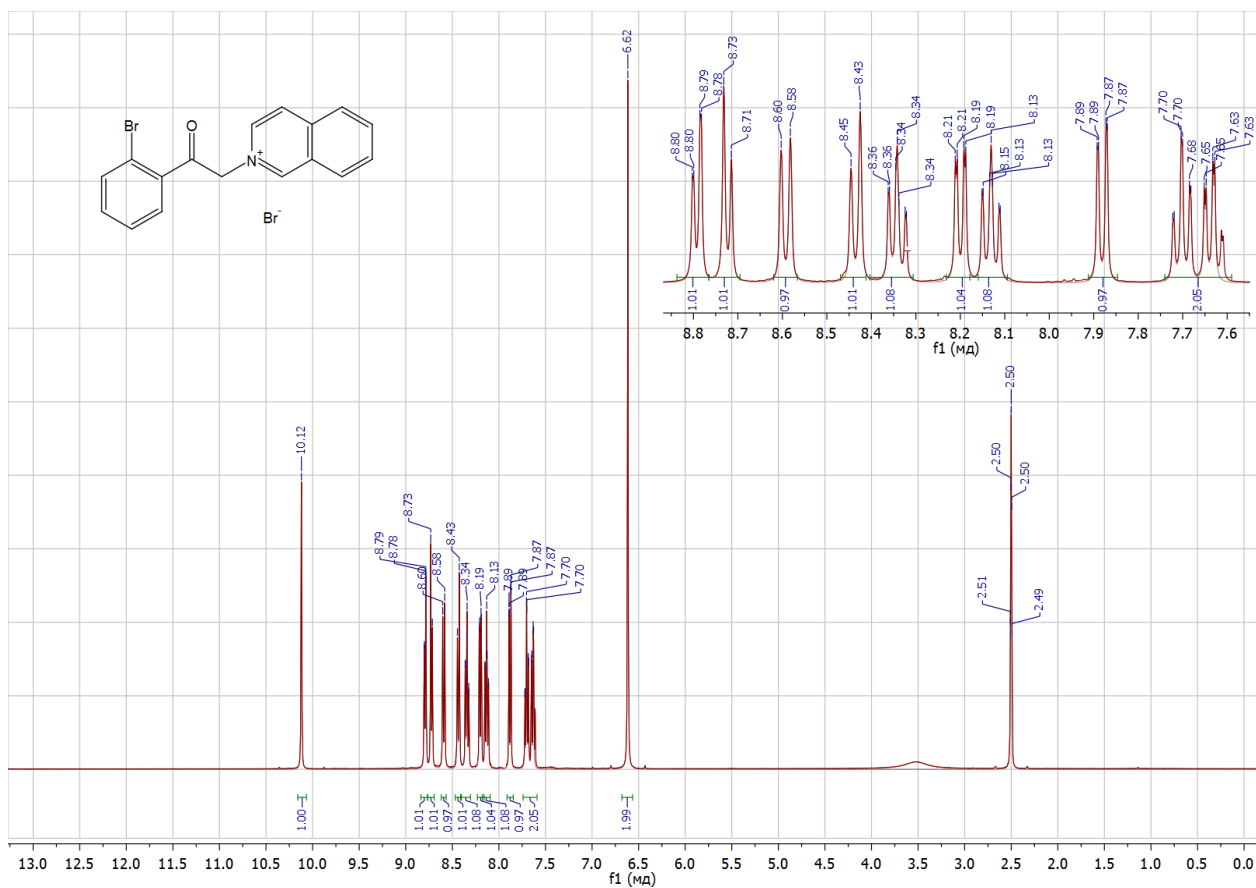

$^{13}\text{C}\{^1\text{H}\}$  NMR (101 MHz,  $\text{DMSO-}d_6$ ) of 2-(2-(2-bromophenyl)-2-oxoethyl)isoquinolin-2-ium bromide (**15g**)

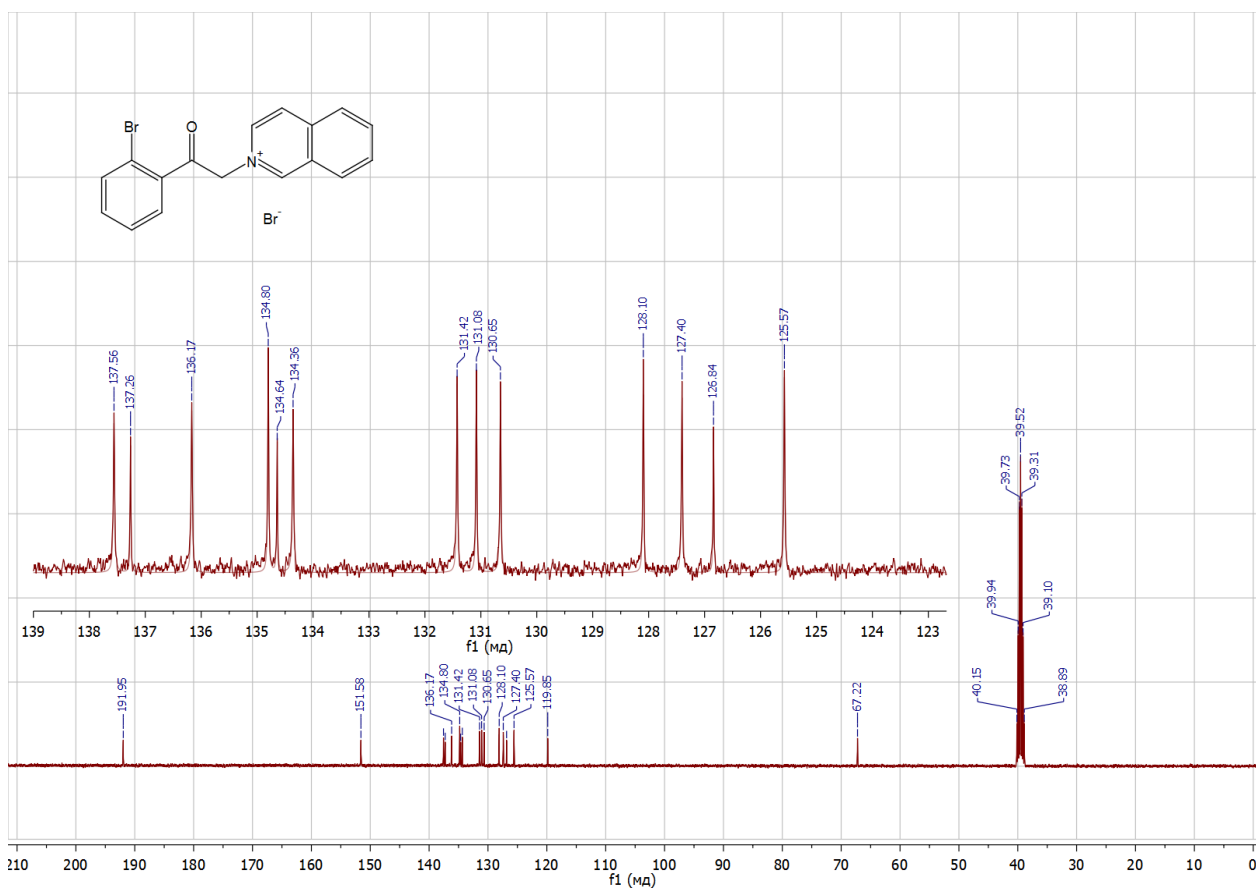

$^{13}\text{C}$  DEPT135 NMR (101 MHz,  $\text{DMSO-}d_6$ ) of 2-(2-(2-bromophenyl)-2-oxoethyl)isoquinolin-2-ium bromide (**15g**)

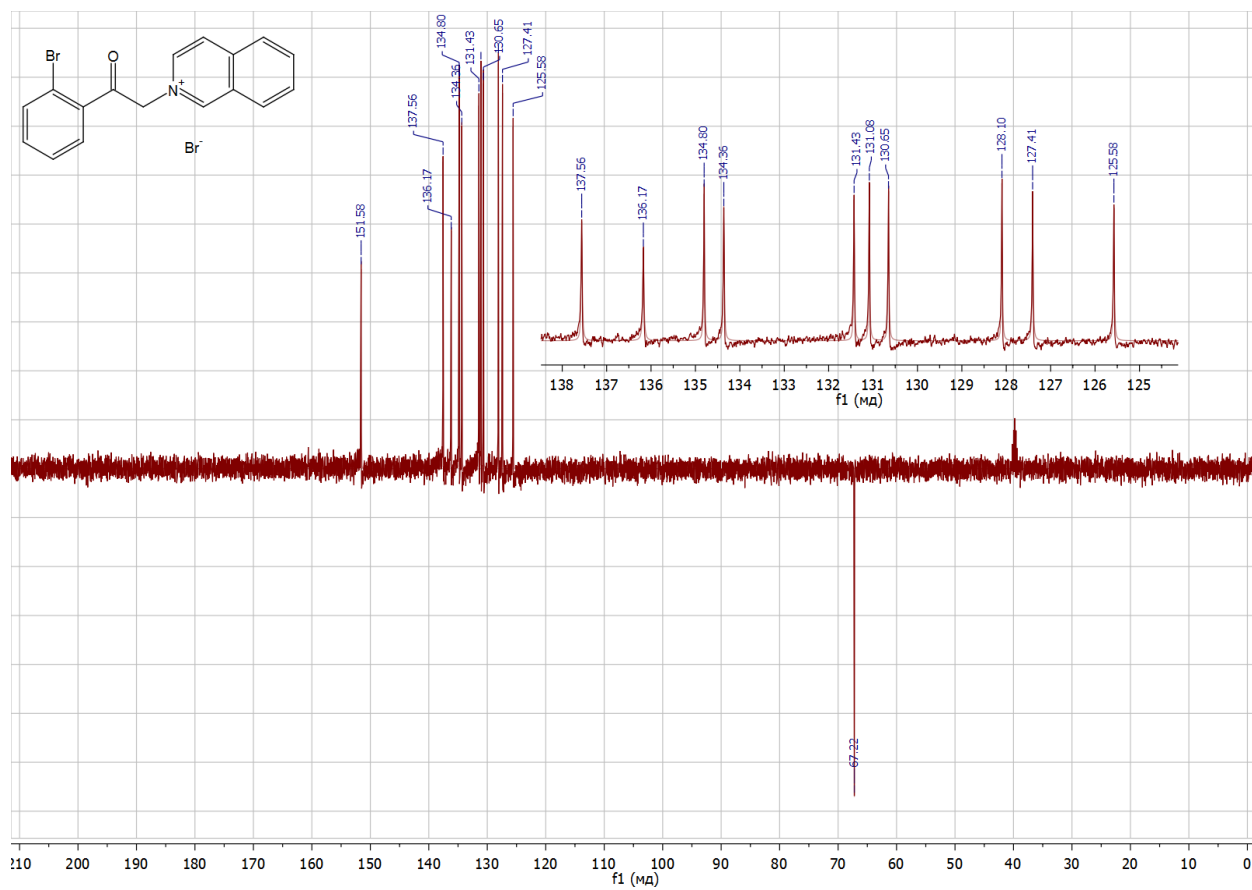

$^1\text{H}$  NMR (400 MHz,  $\text{DMSO}-d_6$ ) of 4-benzoyl-1-(2-(2-bromophenyl)-2-oxoethyl)pyridin-1-ium bromide (**15j**)

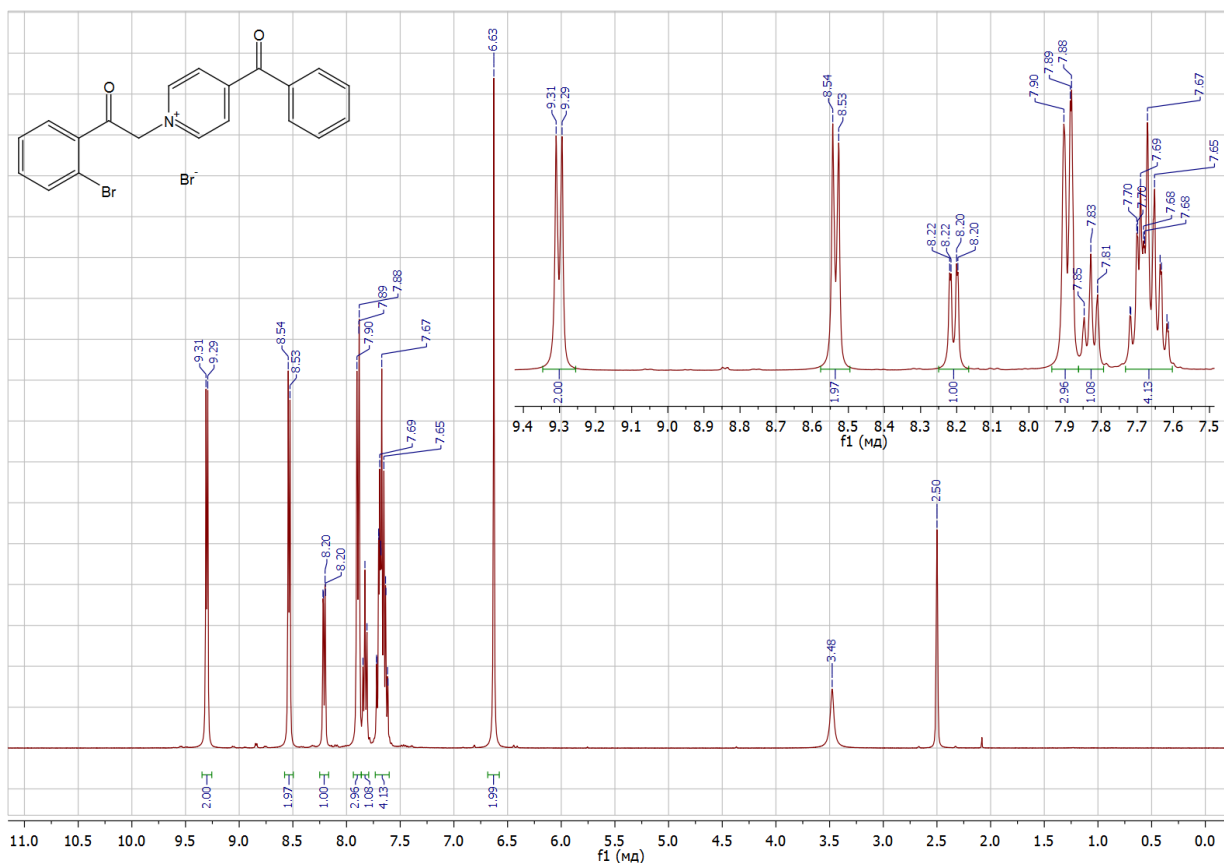

$^{13}\text{C}\{^1\text{H}\}$  NMR (101 MHz,  $\text{DMSO}-d_6$ ) of 4-benzoyl-1-(2-(2-bromophenyl)-2-oxoethyl)pyridin-1-ium bromide (**15j**)

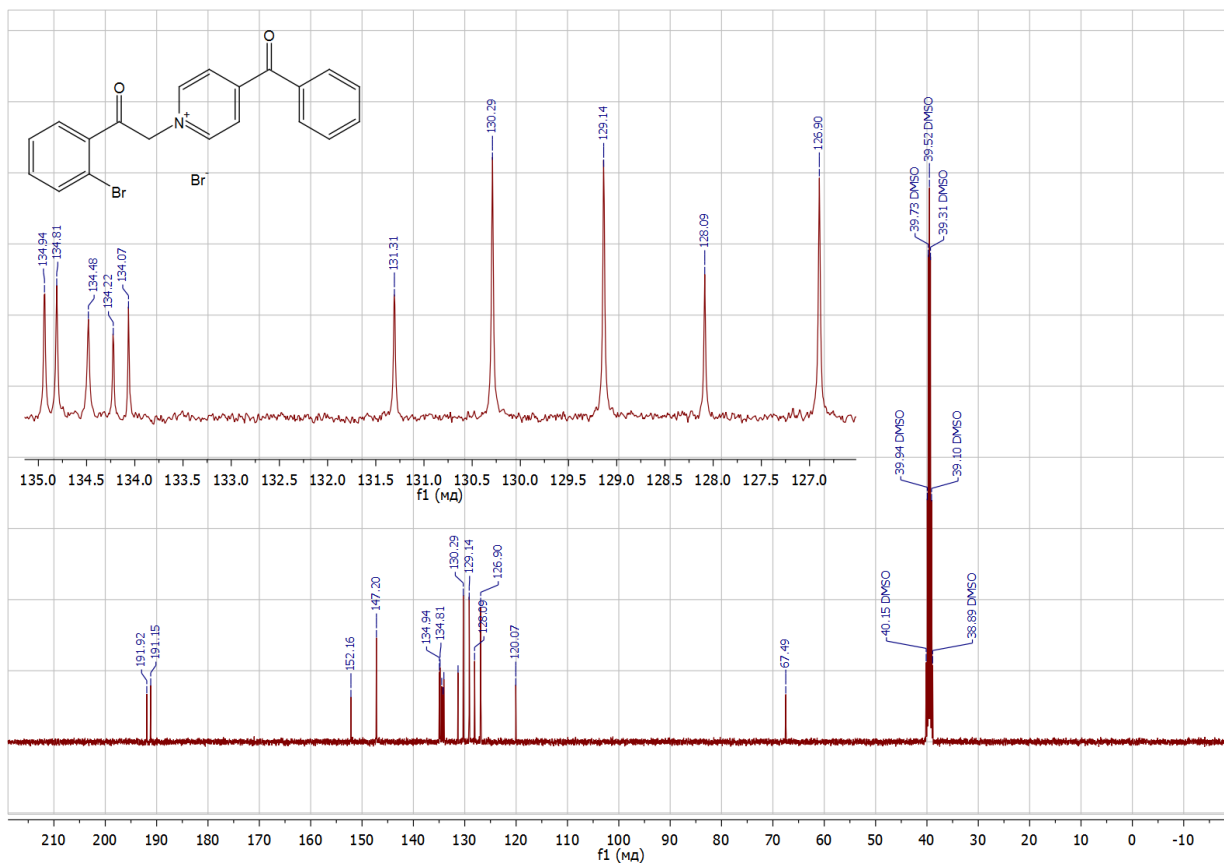

$^{13}\text{C}$  DEPT135 NMR (101 MHz,  $\text{DMSO-}d_6$ ) of 4-benzoyl-1-(2-(2-bromophenyl)-2-oxoethyl)pyridin-1-ium bromide (**15j**)

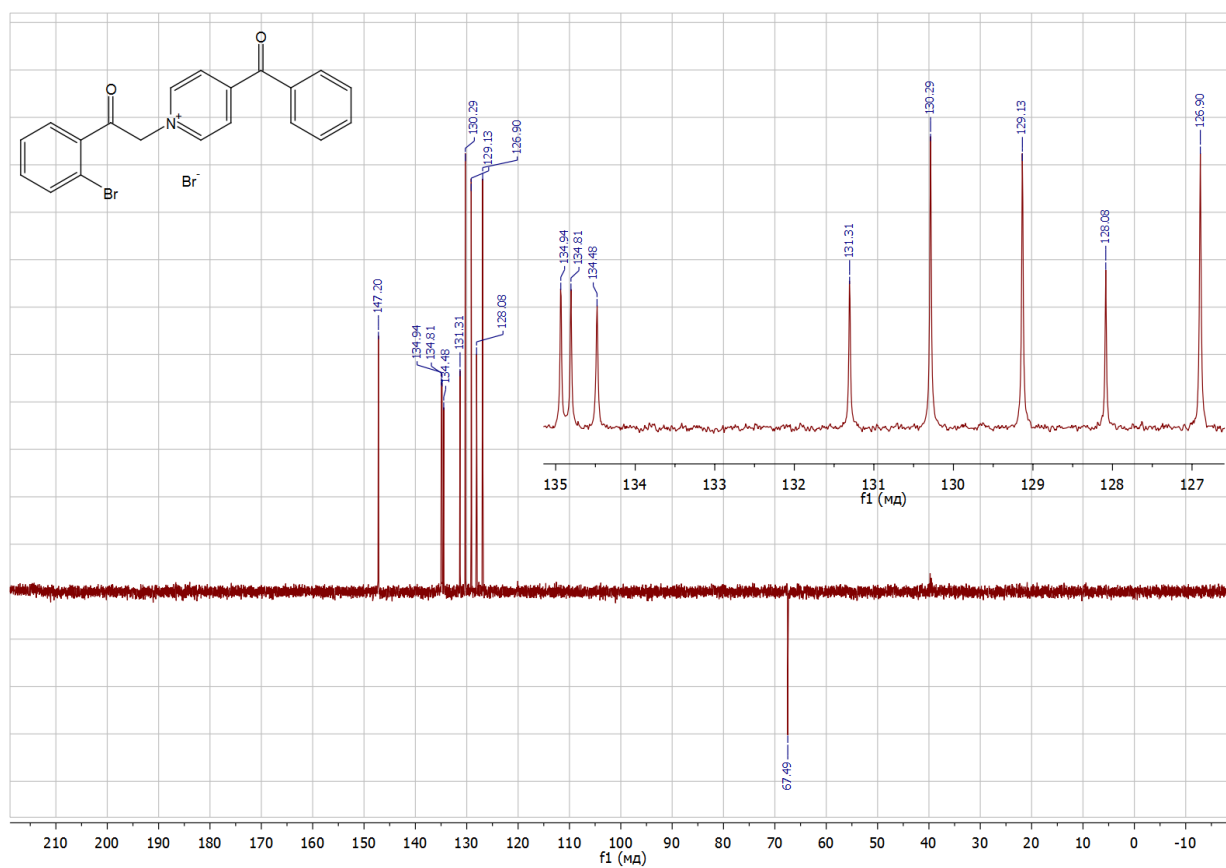

$^1\text{H}$  NMR (400 MHz,  $\text{DMSO-}d_6$ ) of 1-(2-(2-bromophenyl)-4-phenyl-1*H*-pyrrol-3-yl)-4-methylpyridin-1-ium bromide (**16b**)

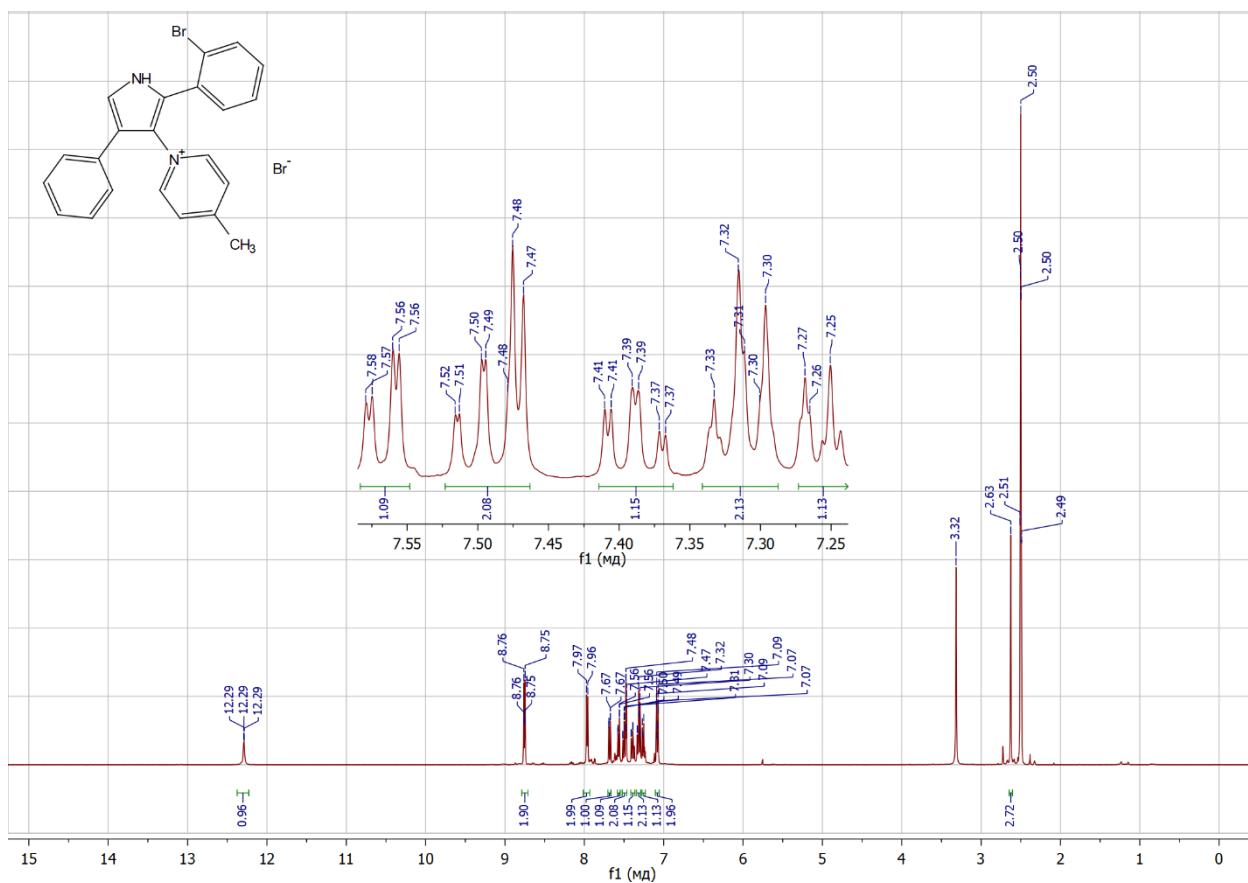

$^{13}\text{C}\{^1\text{H}\}$  NMR (101 MHz,  $\text{DMSO-}d_6$ ) of 1-(2-(2-bromophenyl)-4-phenyl-1*H*-pyrrol-3-yl)-4-methylpyridin-1-ium bromide (**16b**)

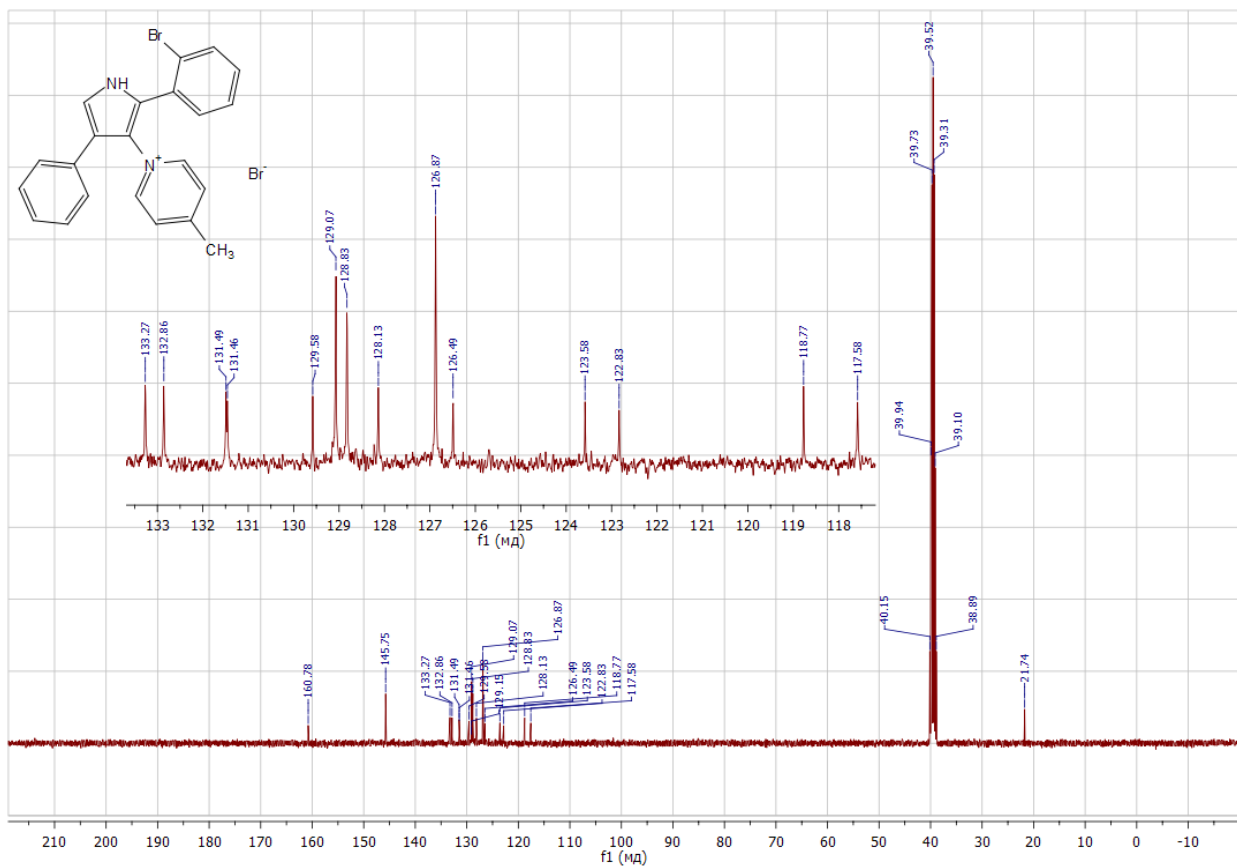

$^{13}\text{C}$  DEPT135 NMR (101 MHz,  $\text{DMSO}-d_6$ ) of 1-(2-(2-bromophenyl)-4-phenyl-1*H*-pyrrol-3-yl)-4-methylpyridin-1-ium bromide (**16b**)

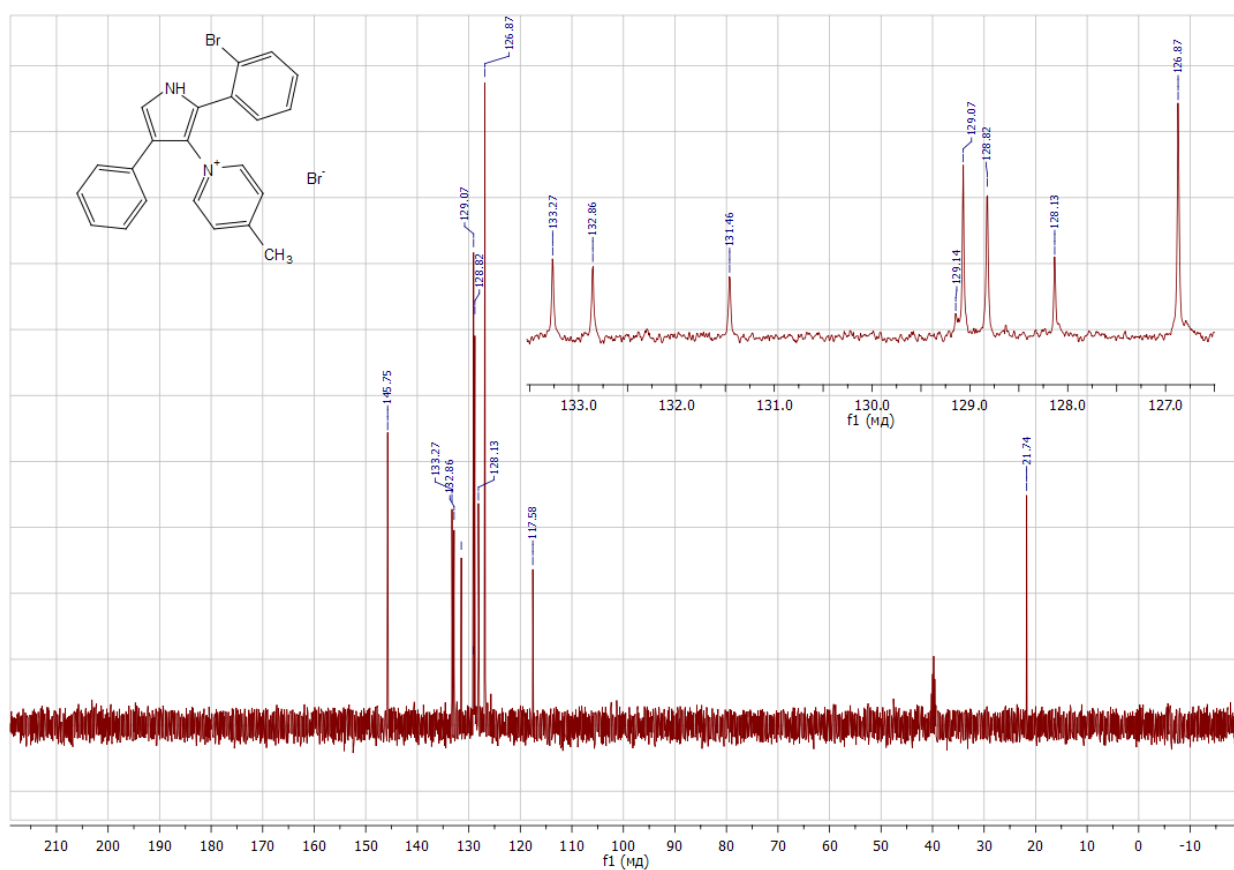

[illegible]

Chemical structure of compound 10: 4-methoxyphenylpyridinium cation with a 2-(2-bromophenyl)-5-phenyl-1H-imidazol-3-yl substituent, paired with a bromide anion.

<sup>1</sup>H NMR spectrum (top) and <sup>13</sup>C NMR spectrum (bottom) of compound 10. The x-axis for both spectra is chemical shift in ppm (delta).

<sup>1</sup>H NMR peaks (ppm): 133.19, 132.83, 131.71, 131.37, 129.84, 129.03, 128.04, 126.73, 126.47, 39.69, 39.52, 39.35.

<sup>13</sup>C NMR peaks (ppm): 171.33, 148.19, 133.19, 132.83, 131.71, 131.37, 129.84, 129.03, 128.04, 126.73, 126.47, 123.69, 123.38, 118.83, 117.20, 113.83, 58.42, 40.02, 39.65, 39.19, 39.02.

$^{13}\text{C}$  DEPT135 NMR (126 MHz,  $\text{DMSO-}d_6$ ) of 1-(2-(2-Bromophenyl)-4-phenyl-1*H*-pyrrol-3-yl)-4-methoxypyridin-1-ium bromide (**16c**)

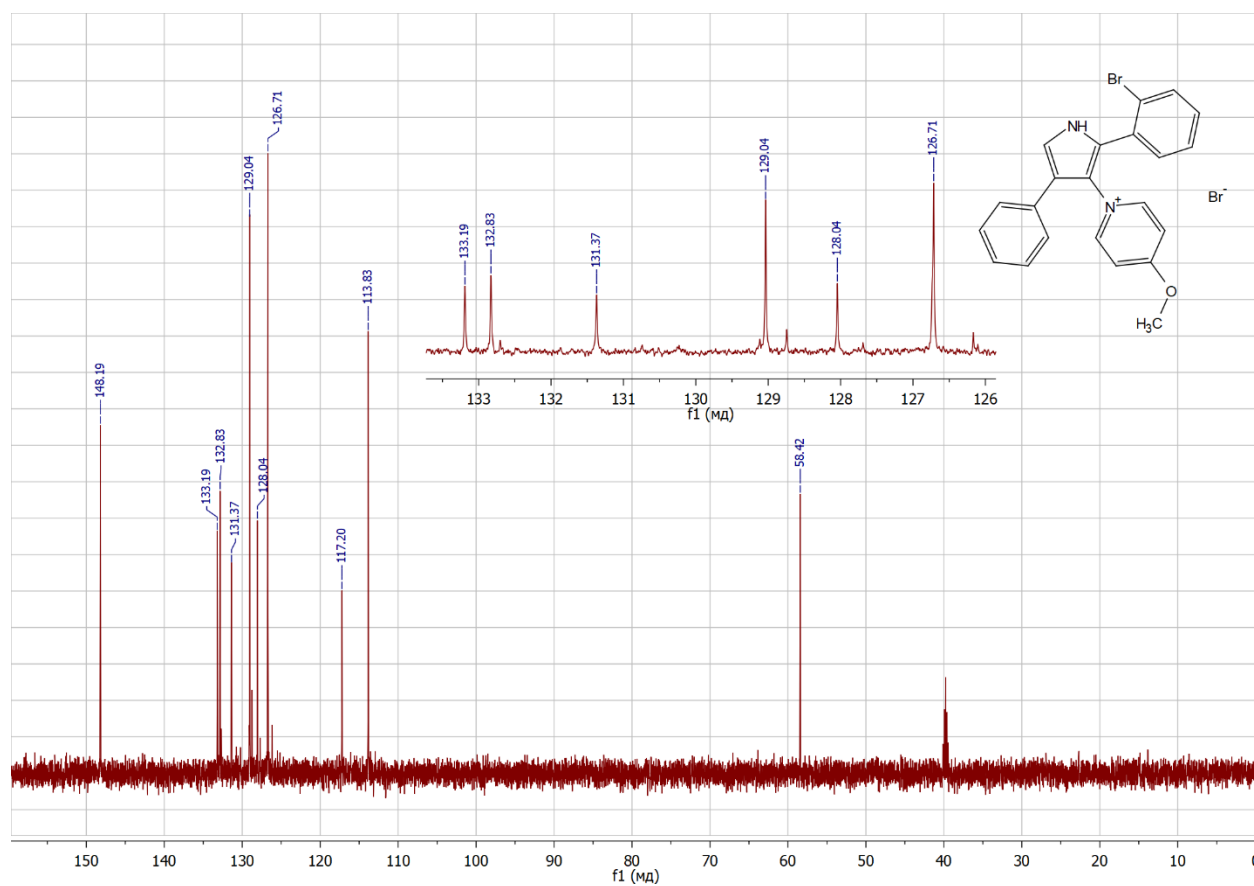



$^1\text{H}$  NMR (400 MHz,  $\text{DMSO-}d_6$ ) of 1-(2-(2-bromophenyl)-4-phenyl-1*H*-pyrrol-3-yl)-4-(4-methoxyphenyl)pyridin-1-ium bromide (**16e**)

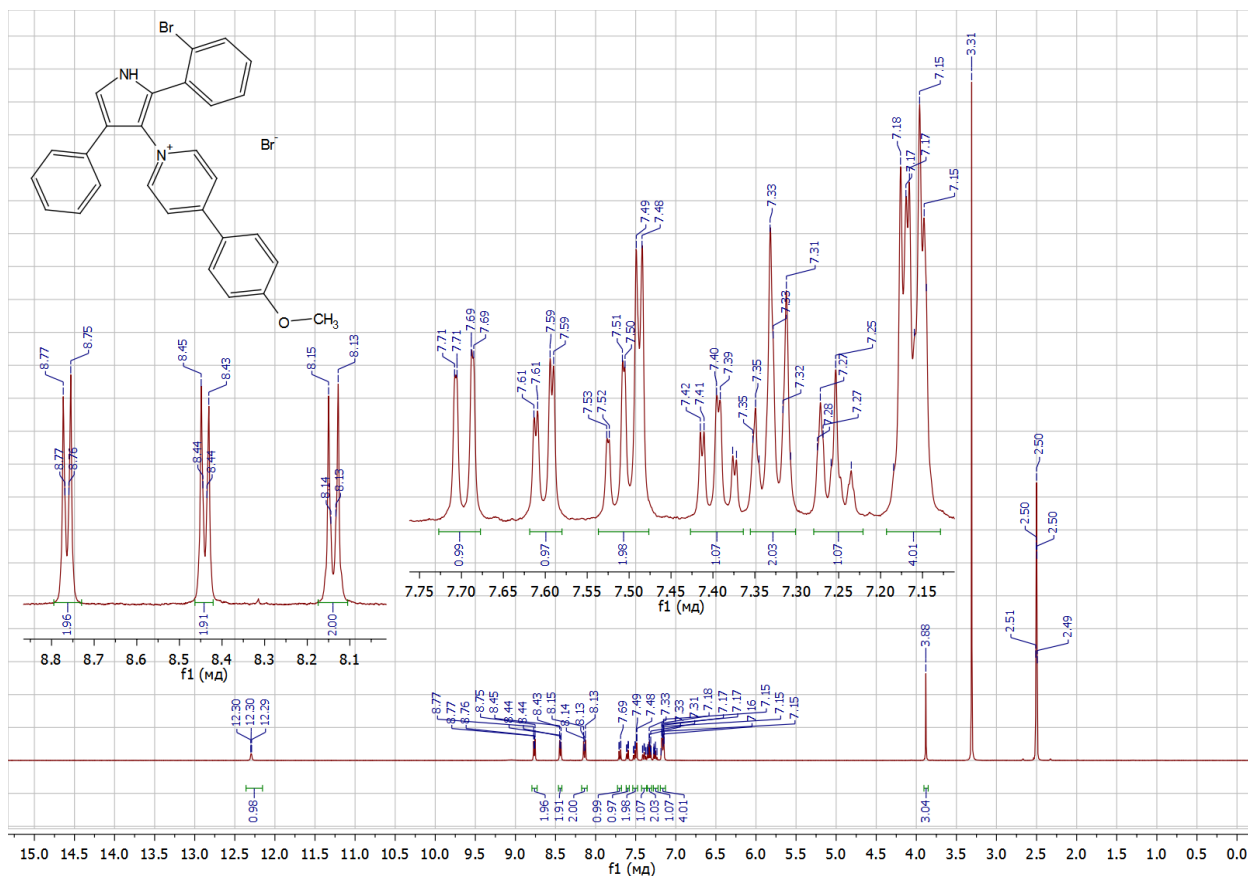

$^{13}\text{C}\{^1\text{H}\}$  NMR (101 MHz,  $\text{DMSO-}d_6$ ) of 1-(2-(2-bromophenyl)-4-phenyl-1*H*-pyrrol-3-yl)-4-(4-methoxyphenyl)pyridin-1-ium bromide (**16e**)

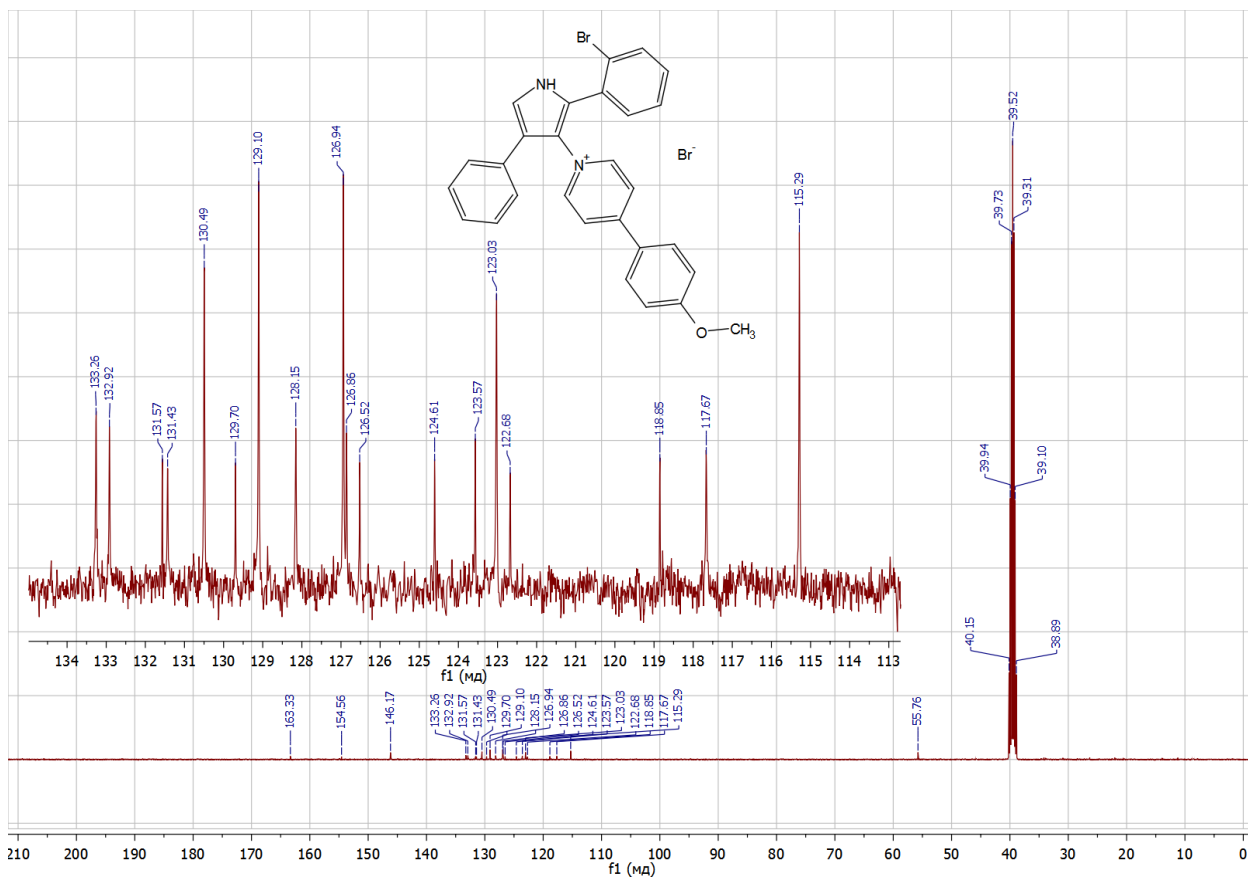

$^{13}\text{C}$  DEPT135 NMR (101 MHz,  $\text{DMSO}-d_6$ ) of 1-(2-(2-bromophenyl)-4-phenyl-1*H*-pyrrol-3-yl)-4-(4-methoxyphenyl)pyridin-1-ium bromide (**16e**)

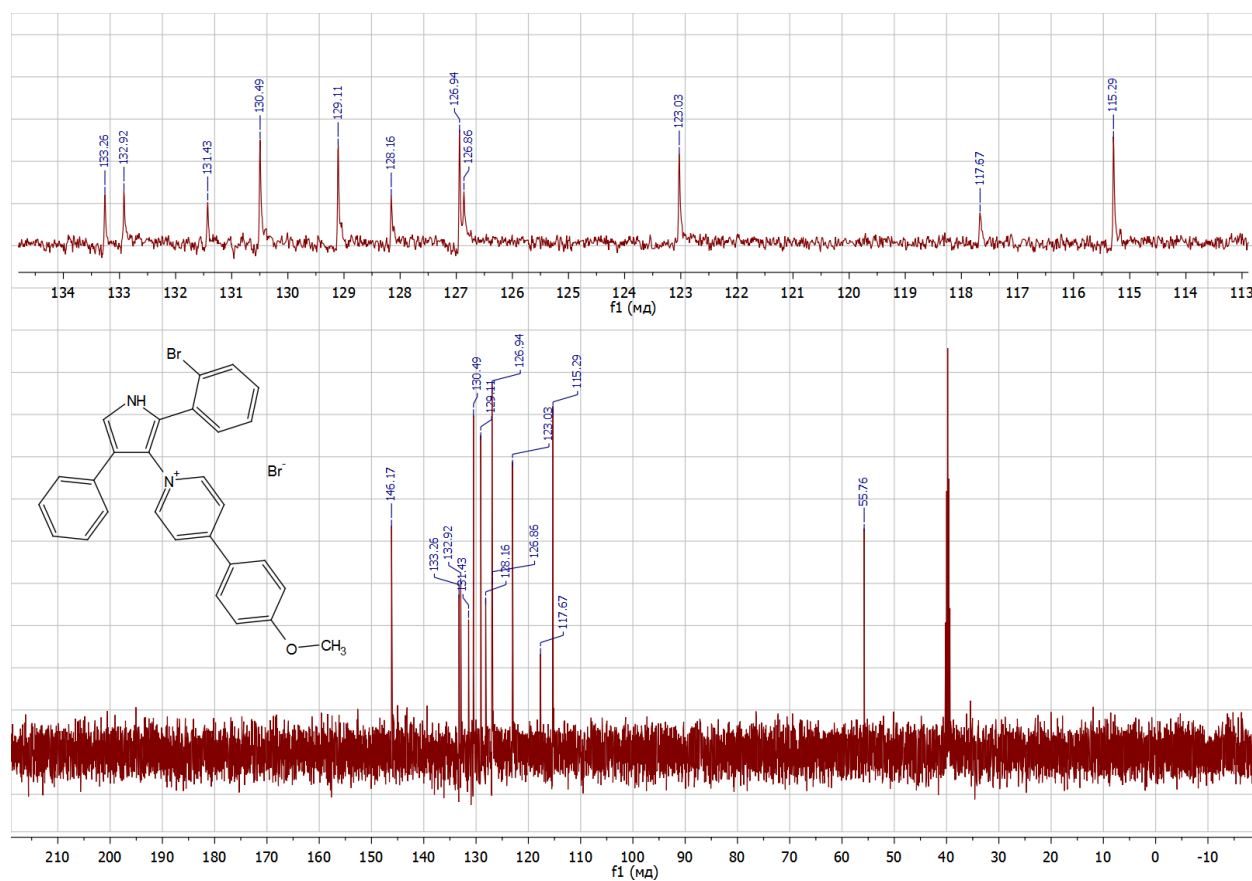

$^1\text{H}$  NMR (400 MHz,  $\text{DMSO-}d_6$ ) of 1-(2-(2-bromophenyl)-4-phenyl-1*H*-pyrrol-3-yl)-3,5-dimethylpyridin-1-ium bromide (**16f**)

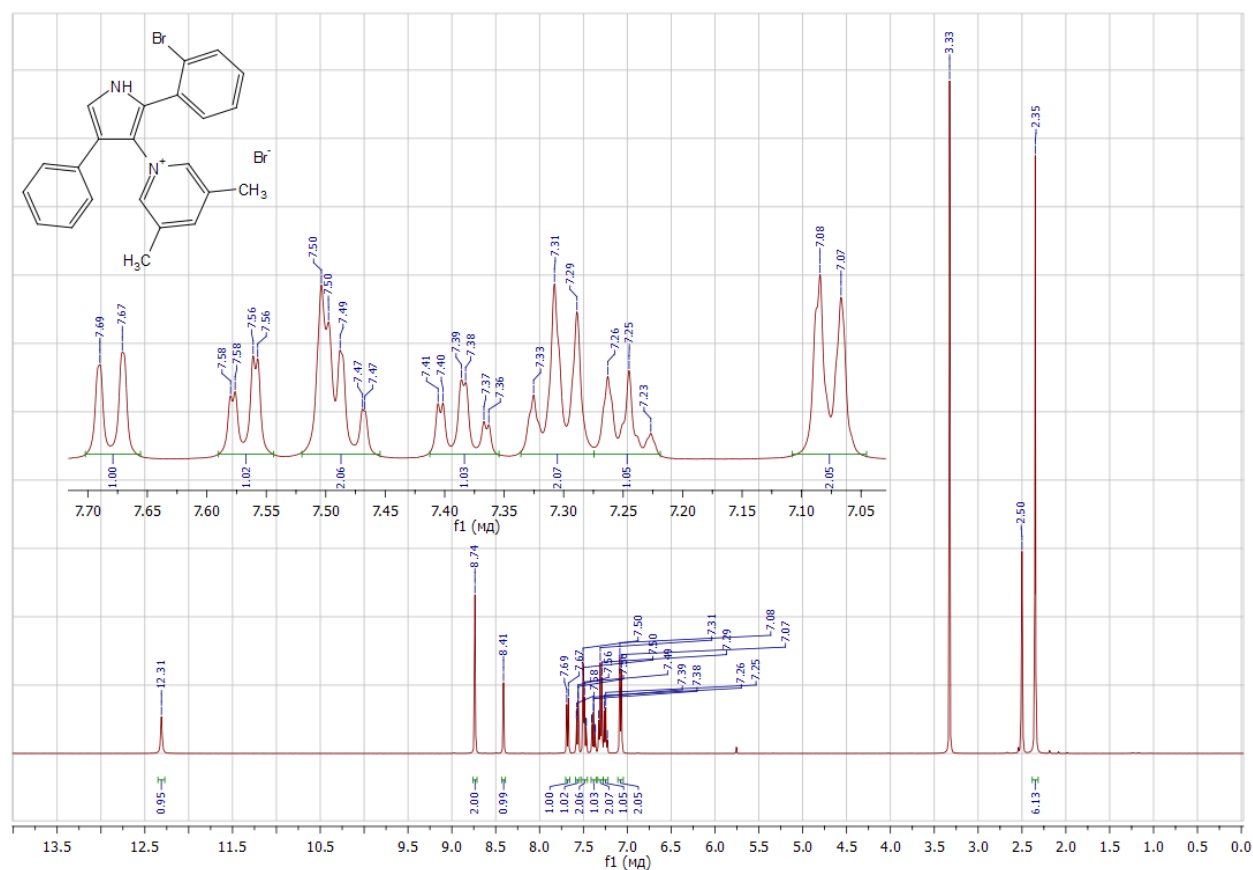

$^{13}\text{C}\{^1\text{H}\}$  NMR (101 MHz,  $\text{DMSO-}d_6$ ) of 1-(2-(2-bromophenyl)-4-phenyl-1*H*-pyrrol-3-yl)-3,5-dimethylpyridin-1-ium bromide (**16f**)

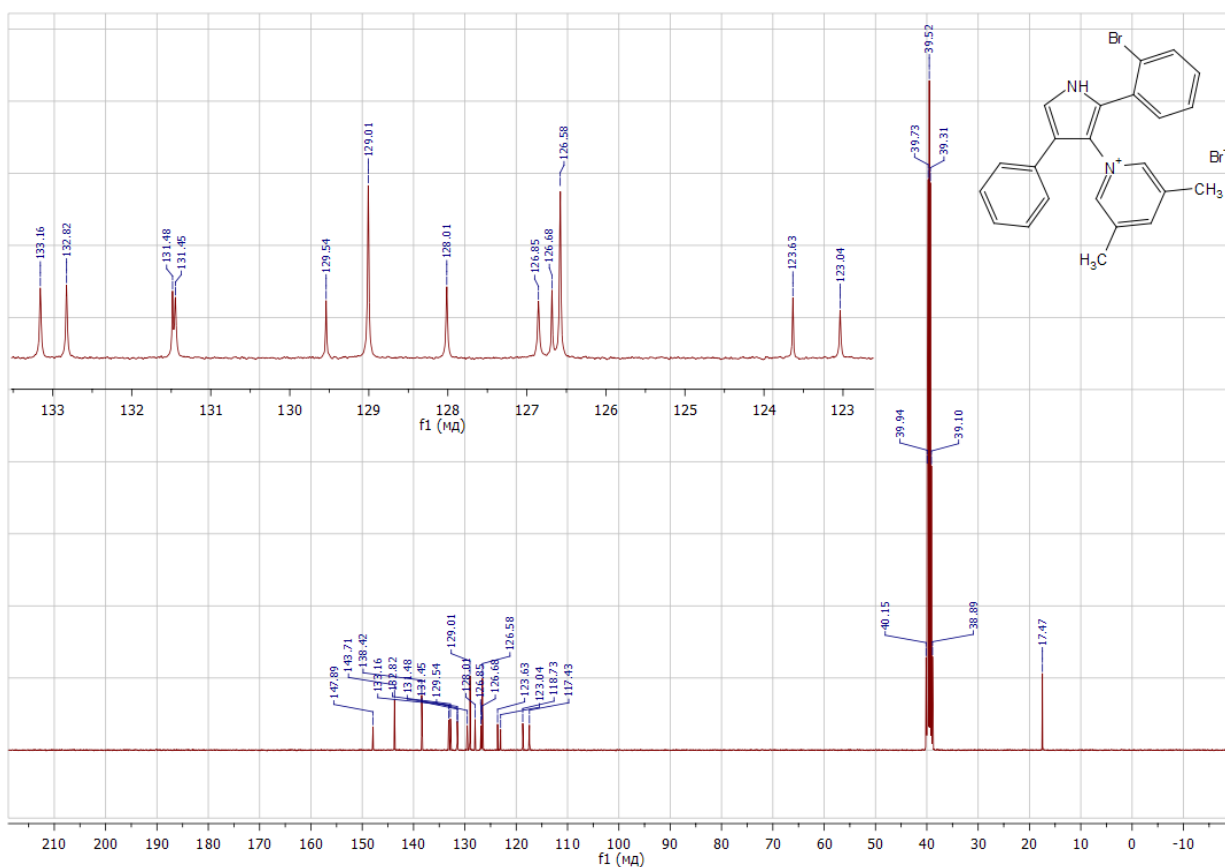

$^{13}\text{C}$  DEPT135 NMR (101 MHz,  $\text{DMSO-}d_6$ ) of 1-(2-(2-bromophenyl)-4-phenyl-1*H*-pyrrol-3-yl)-3,5-dimethylpyridin-1-ium bromide (**16f**)

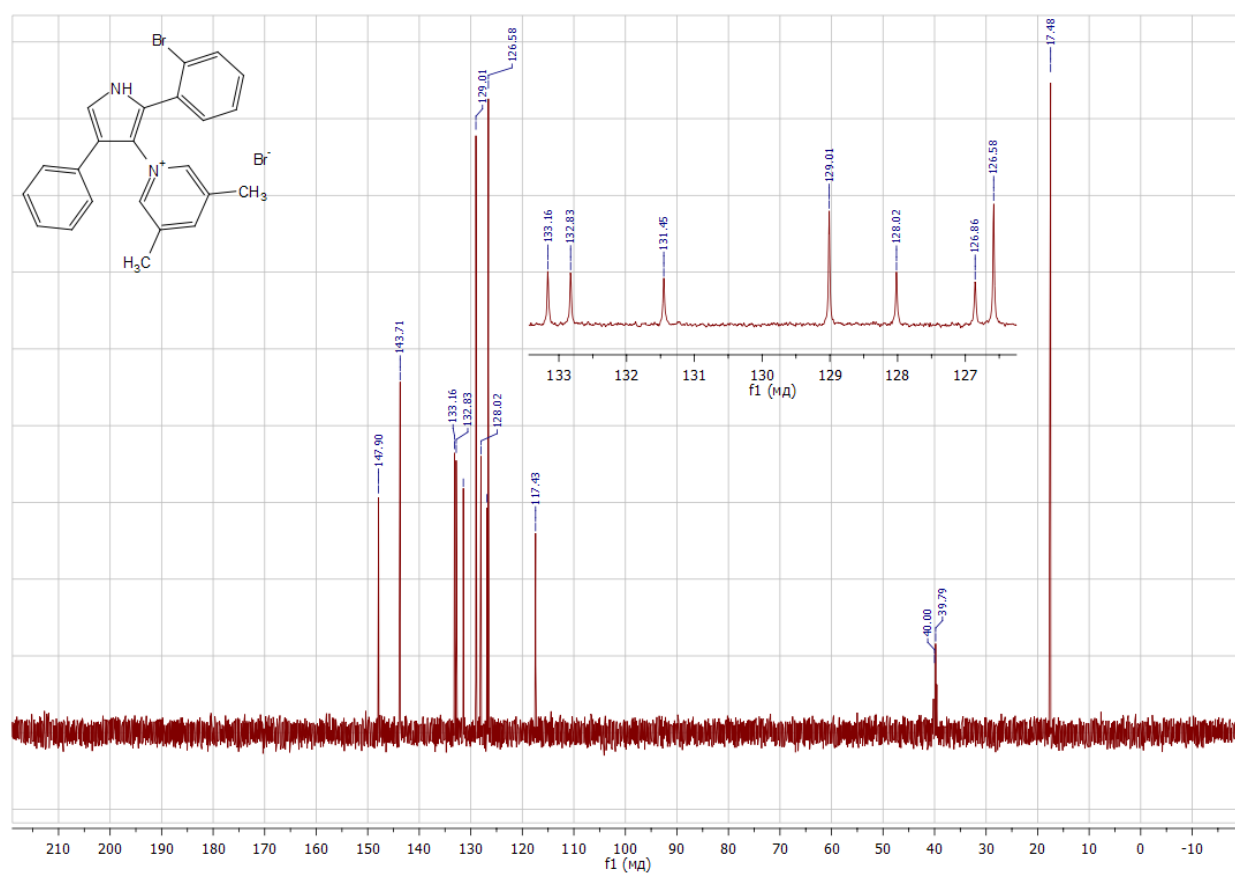

$^1\text{H}$  NMR (500 MHz,  $\text{DMSO-}d_6$ ) of 2-(2-(2-bromophenyl)-4-phenyl-1*H*-pyrrol-3-yl)isoquinolin-2-ium bromide (**16g**)

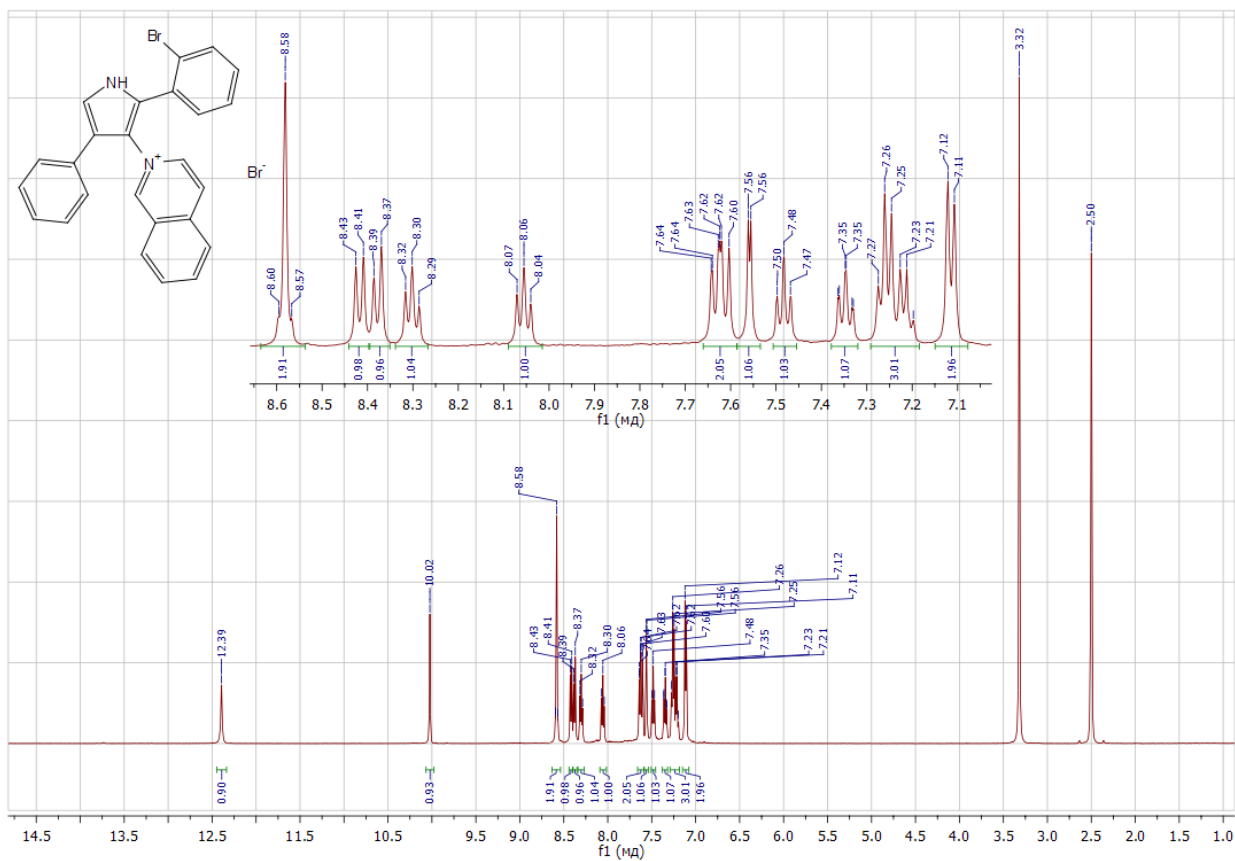

$^{13}\text{C}\{^1\text{H}\}$  NMR (126 MHz,  $\text{DMSO-}d_6$ ) of 2-(2-(2-bromophenyl)-4-phenyl-1*H*-pyrrol-3-yl)isoquinolin-2-ium bromide (**16g**)

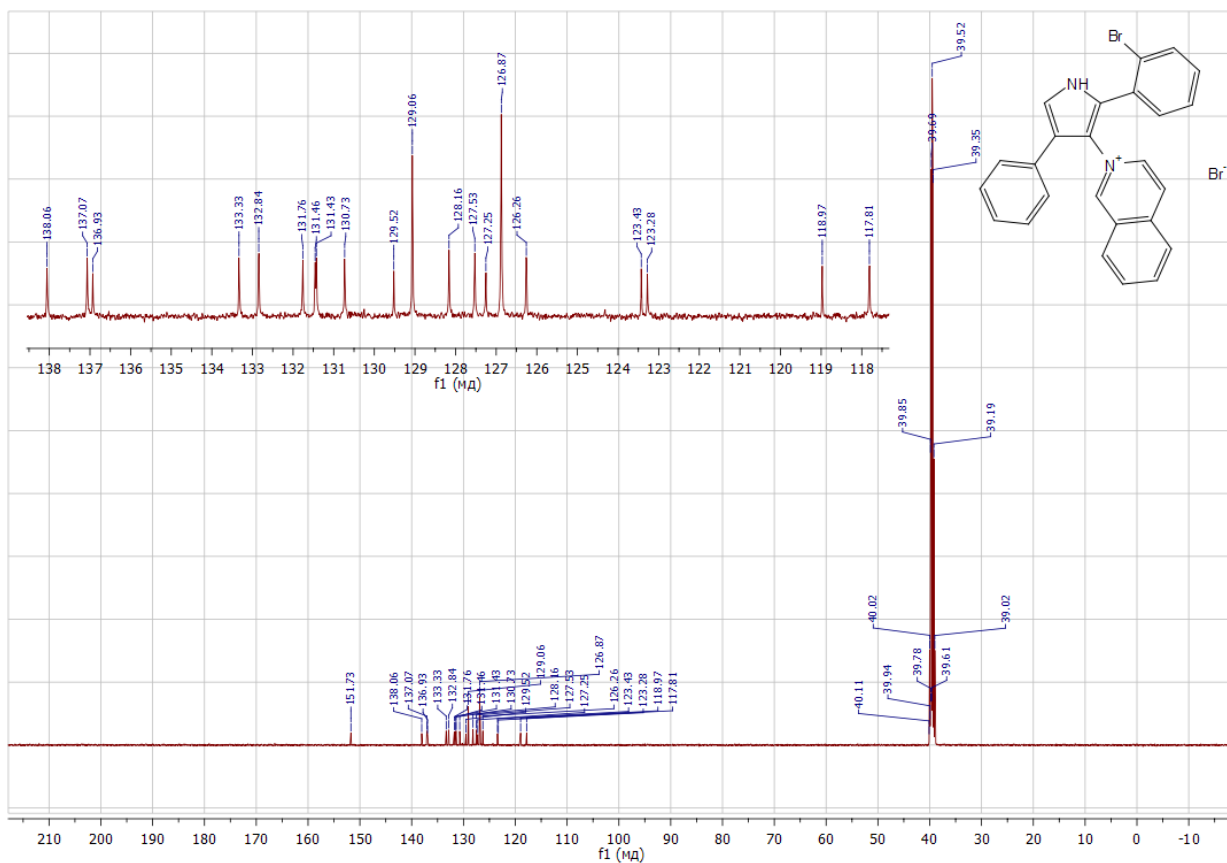

$^{13}\text{C}$  DEPT135 NMR (126 MHz,  $\text{DMSO-}d_6$ ) of 2-(2-(2-bromophenyl)-4-phenyl-1*H*-pyrrol-3-yl)isoquinolin-2-ium bromide (**16g**)

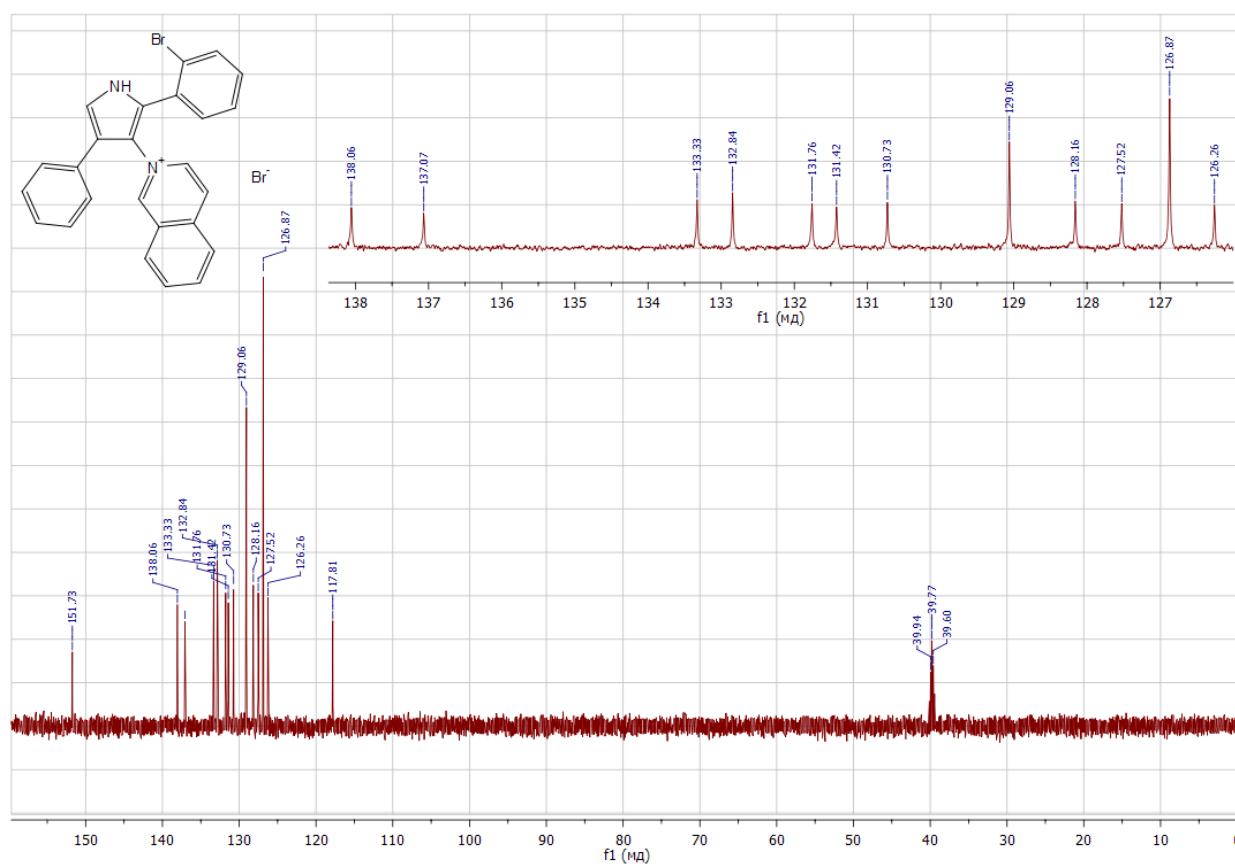

$^1\text{H}$  NMR (400 MHz,  $\text{DMSO}-d_6$ ) of 1-(2-(2-bromophenyl)-4-(4-methoxyphenyl)-1*H*-pyrrol-3-yl)pyridin-1-ium bromide (**16h**)

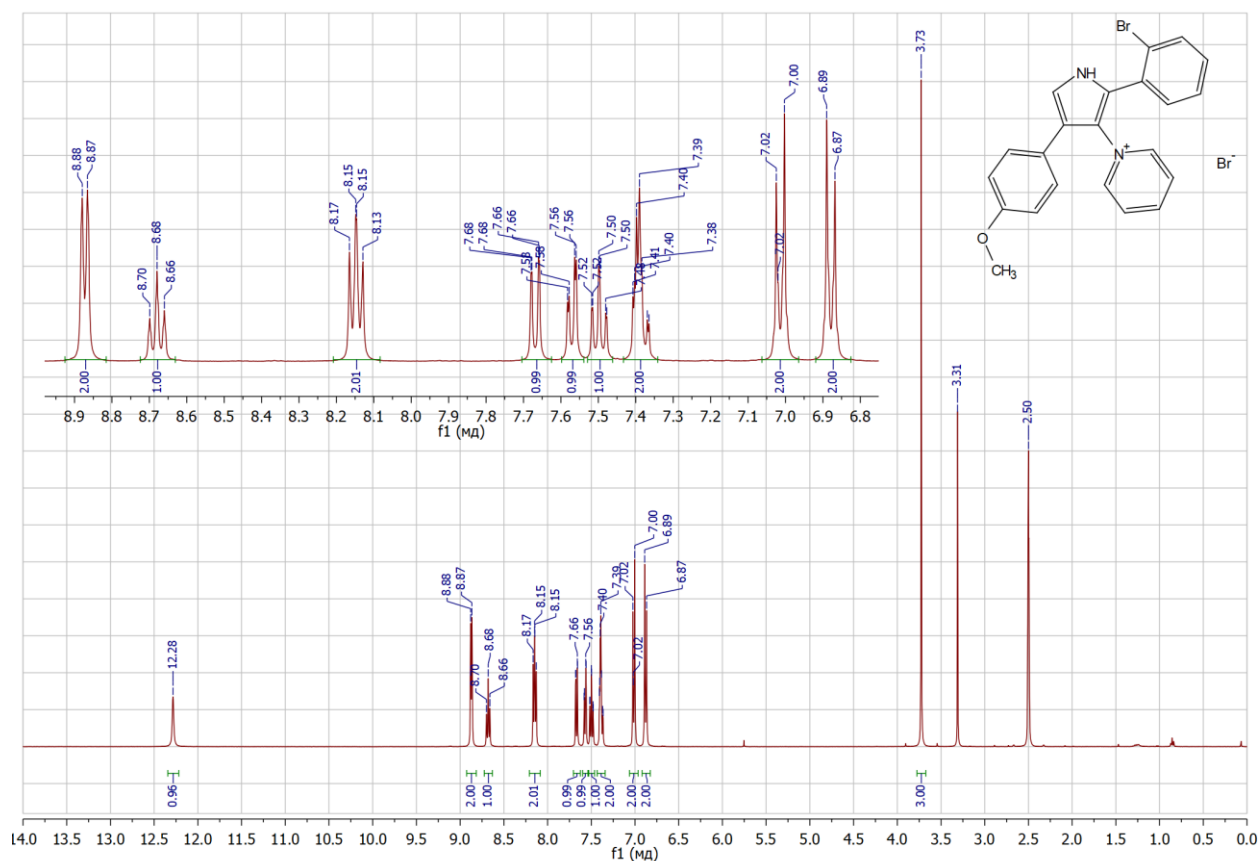

$^{13}\text{C}\{^1\text{H}\}$  NMR (101 MHz,  $\text{DMSO}-d_6$ ) of 1-(2-(2-bromophenyl)-4-(4-methoxyphenyl)-1*H*-pyrrol-3-yl)pyridin-1-ium bromide (**16h**)

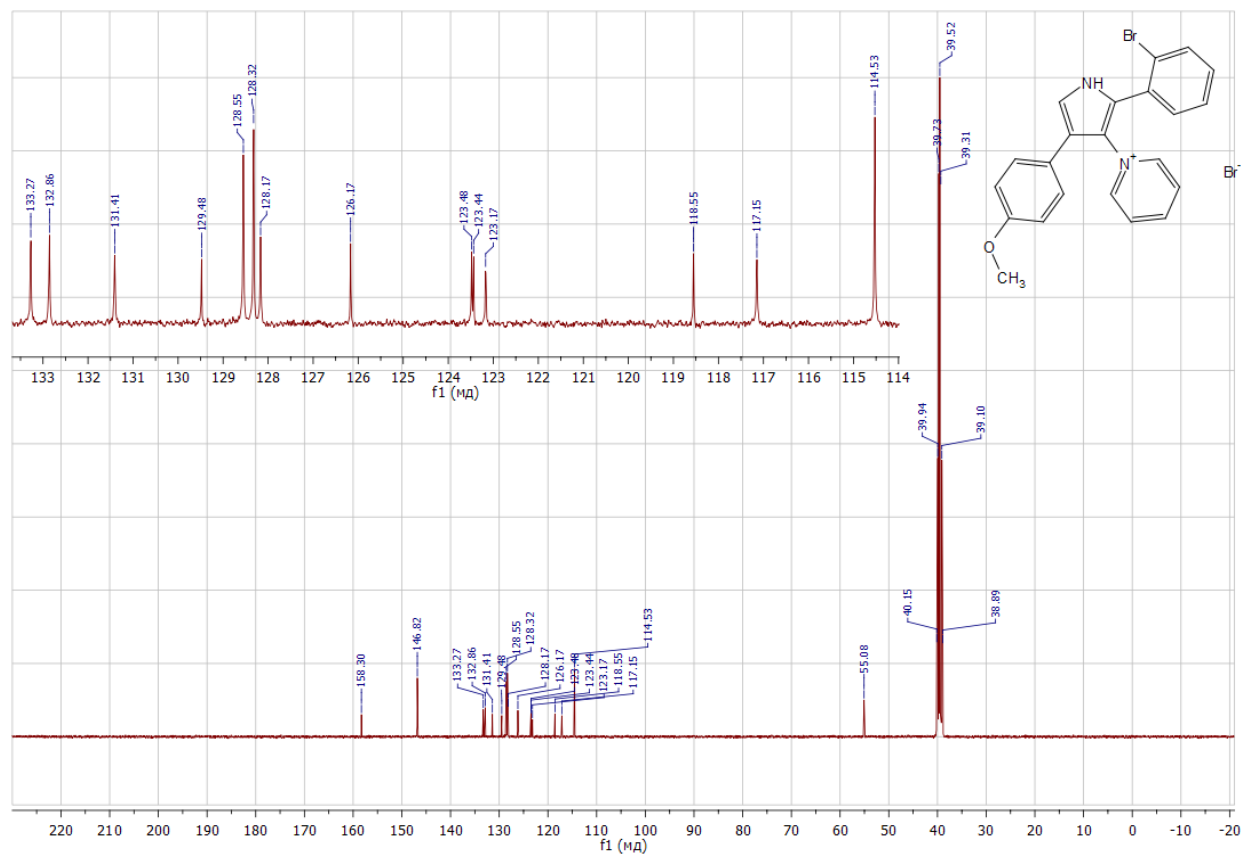

$^{13}\text{C}$  DEPT135 NMR (101 MHz,  $\text{DMSO-}d_6$ ) of 1-(2-(2-bromophenyl)-4-(4-methoxyphenyl)-1*H*-pyrrol-3-yl)pyridin-1-ium bromide (**16h**)

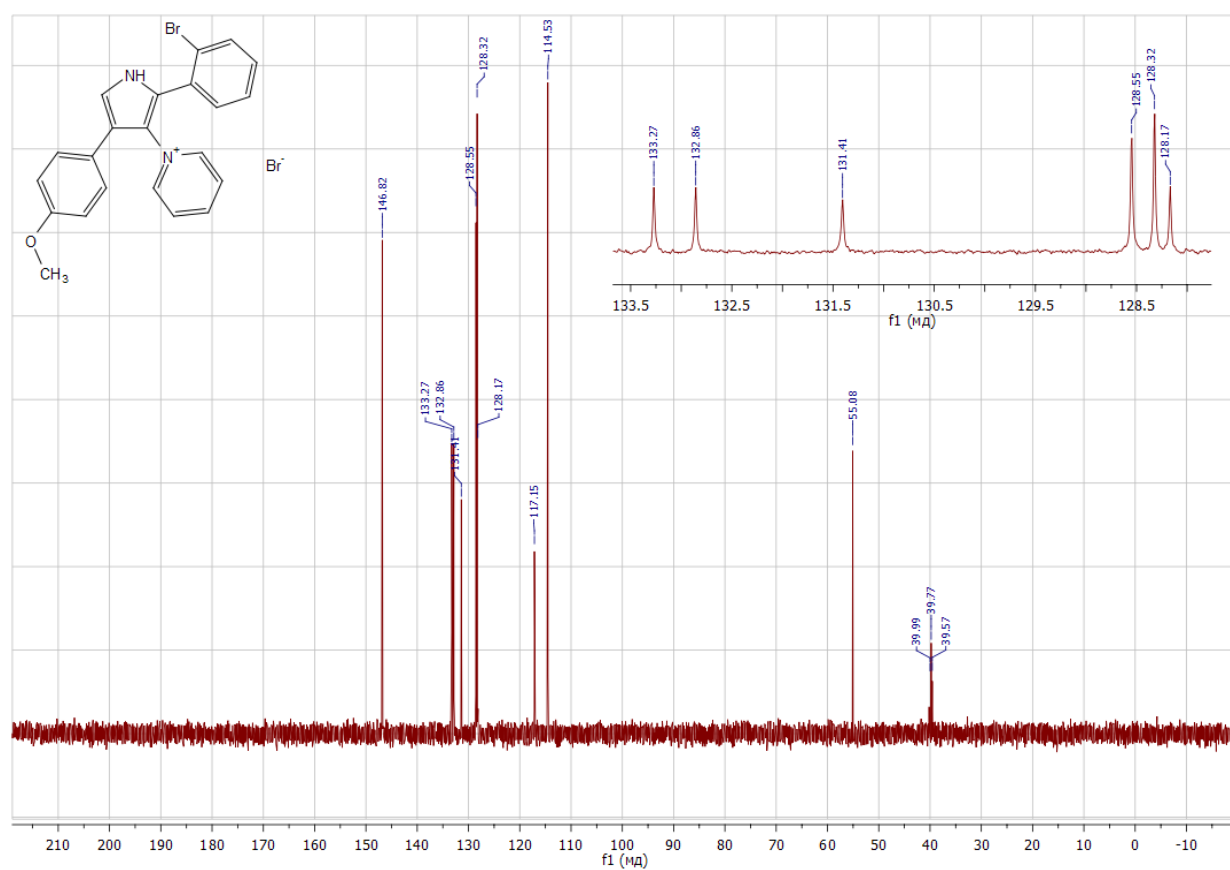



$^1\text{H}$  NMR (400 MHz,  $\text{DMSO}-d_6$ ) of 1-(2-(2-bromophenyl)-4-phenyl-1*H*-pyrrol-3-yl)-4-cyanopyridin-1-ium bromide (**16i**)

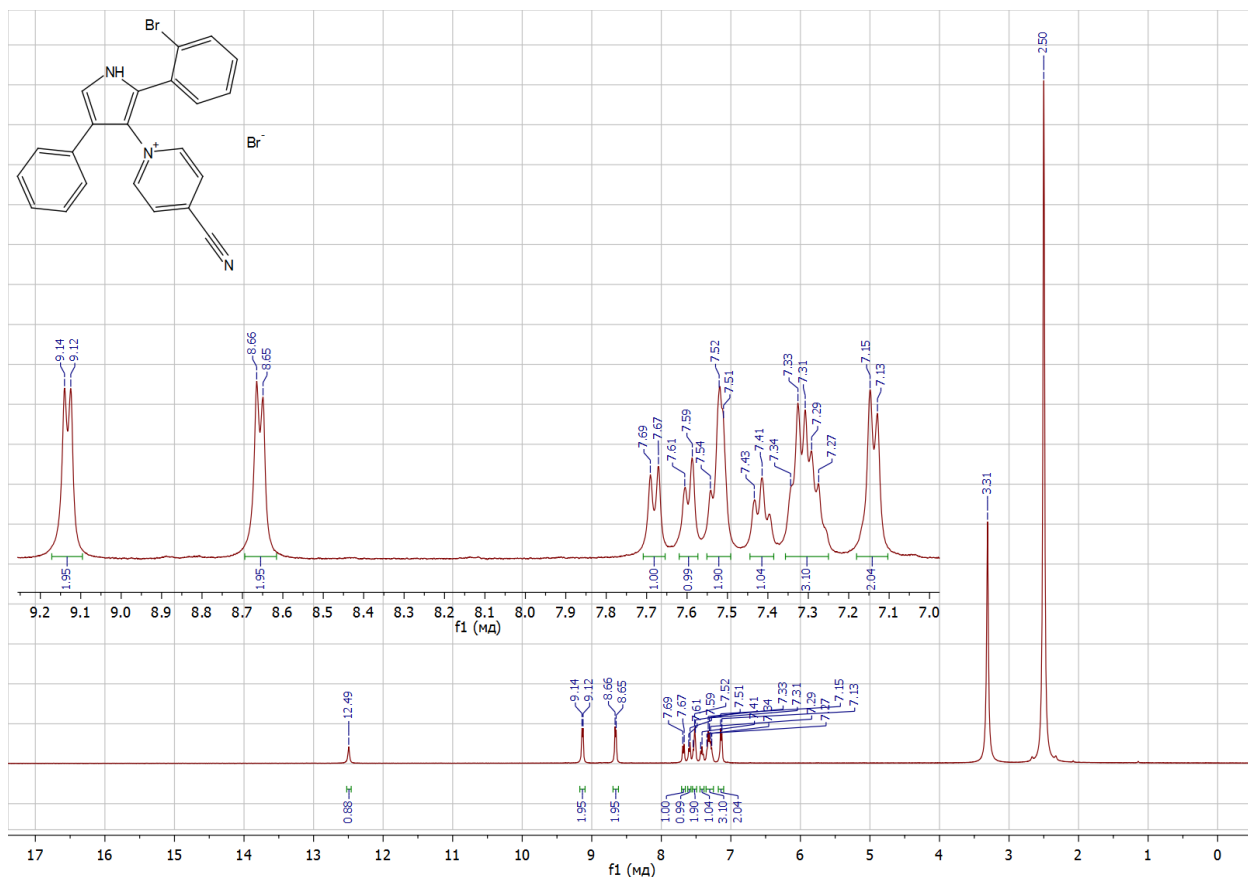

$^{13}\text{C}\{^1\text{H}\}$  NMR (101 MHz,  $\text{DMSO}-d_6$ ) of 1-(2-(2-bromophenyl)-4-phenyl-1*H*-pyrrol-3-yl)-4-cyanopyridin-1-ium bromide (**16i**)

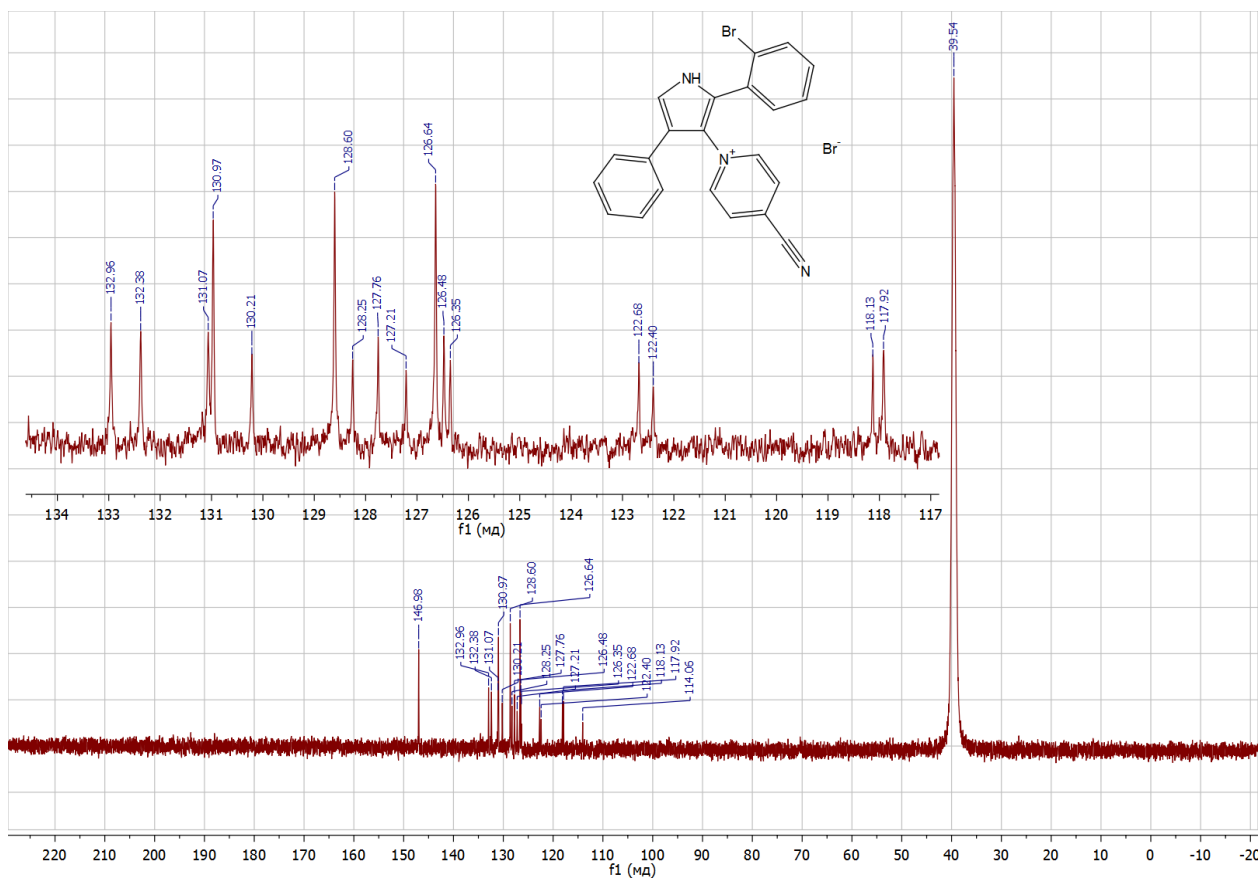

$^{13}\text{C}$  DEPT135 NMR (101 MHz,  $\text{DMSO-}d_6$ ) of 1-(2-(2-bromophenyl)-4-phenyl-1*H*-pyrrol-3-yl)-4-cyanopyridin-1-ium bromide (**16i**)

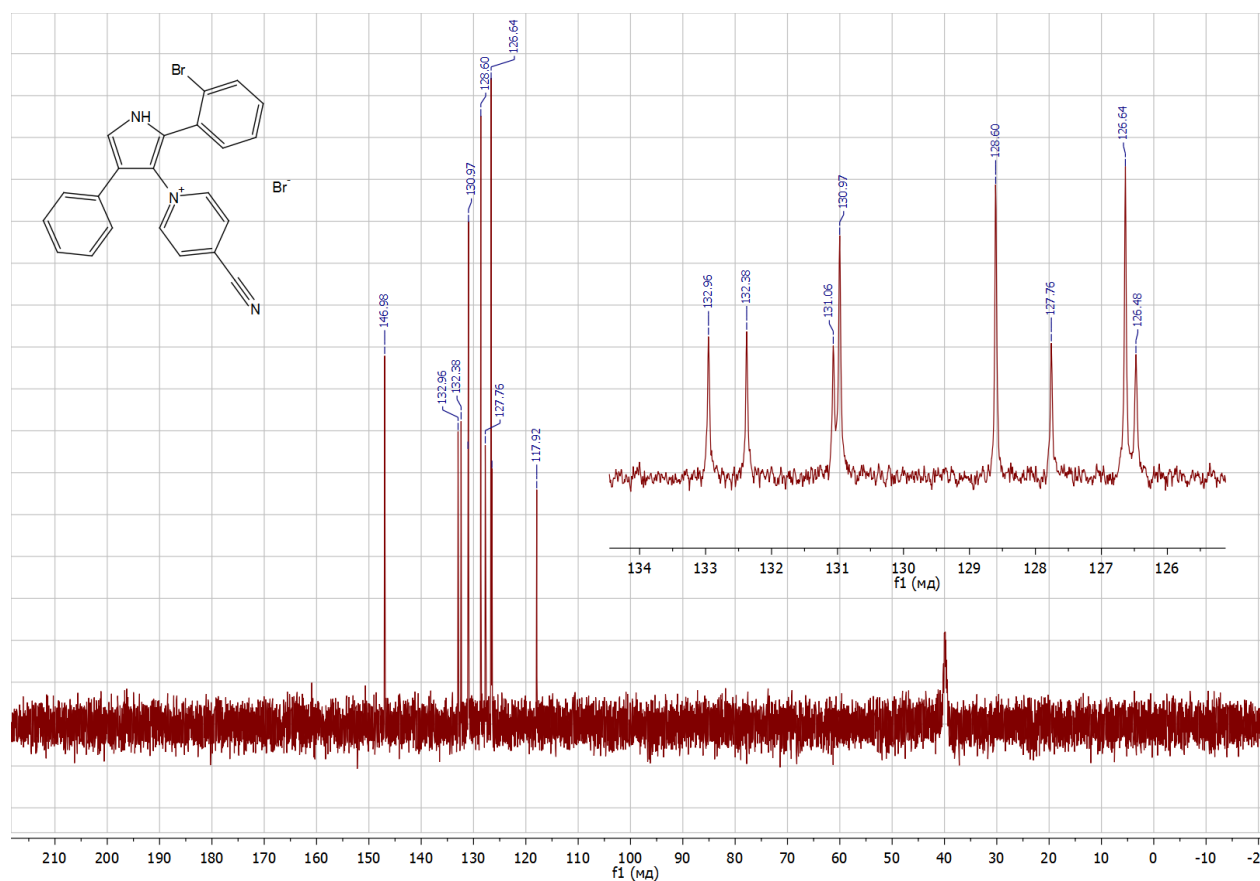

$^1\text{H}$  NMR (400 MHz,  $\text{DMSO}-d_6$ ) of 4-benzoyl-1-(2-(2-bromophenyl)-4-phenyl-1*H*-pyrrol-3-yl)pyridin-1-ium bromide (**16j**)

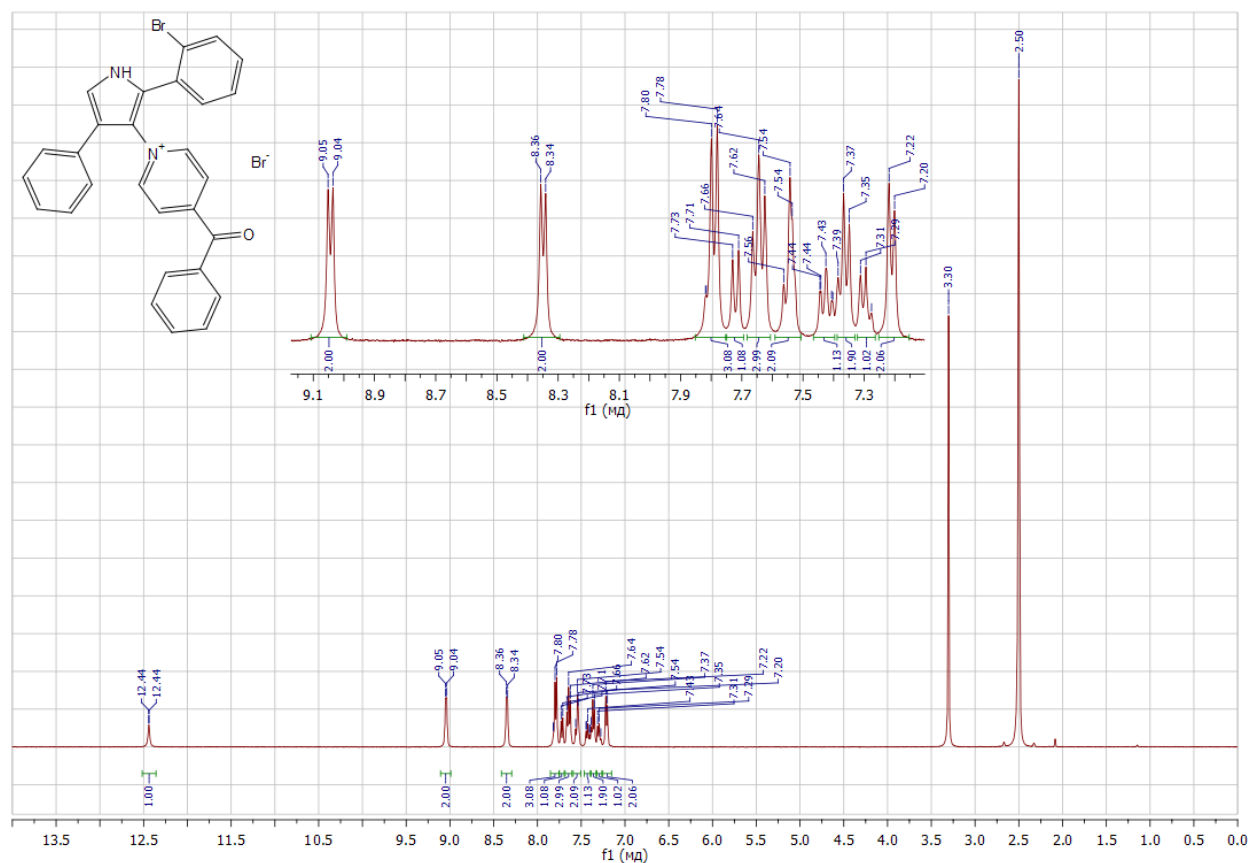

$^{13}\text{C}\{^1\text{H}\}$  NMR (101 MHz,  $\text{DMSO}-d_6$ ) of 4-benzoyl-1-(2-(2-bromophenyl)-4-phenyl-1*H*-pyrrol-3-yl)pyridin-1-ium bromide (**16j**)

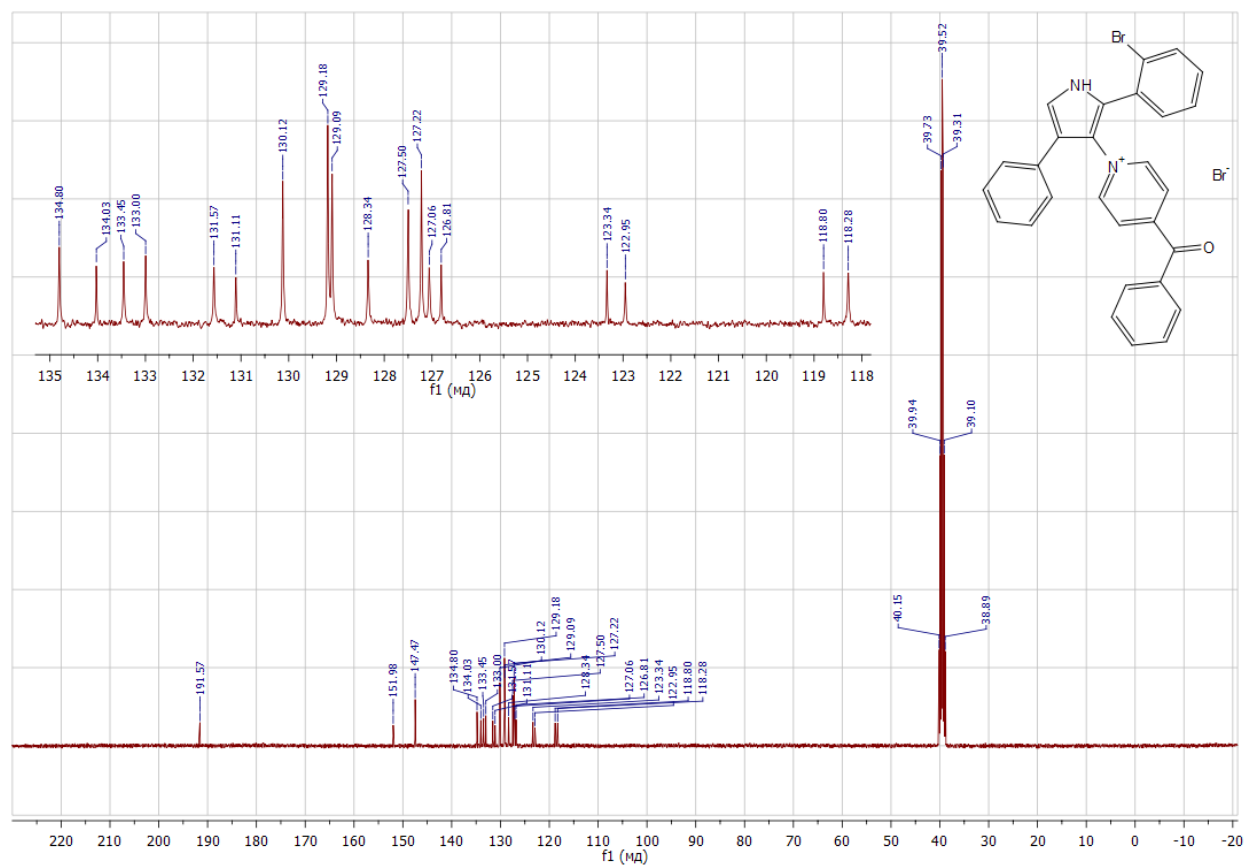

$^{13}\text{C}$  DEPT135 NMR (101 MHz,  $\text{DMSO}-d_6$ ) of 4-benzoyl-1-(2-(2-bromophenyl)-4-phenyl-1*H*-pyrrol-3-yl)pyridin-1-ium bromide (**16j**)

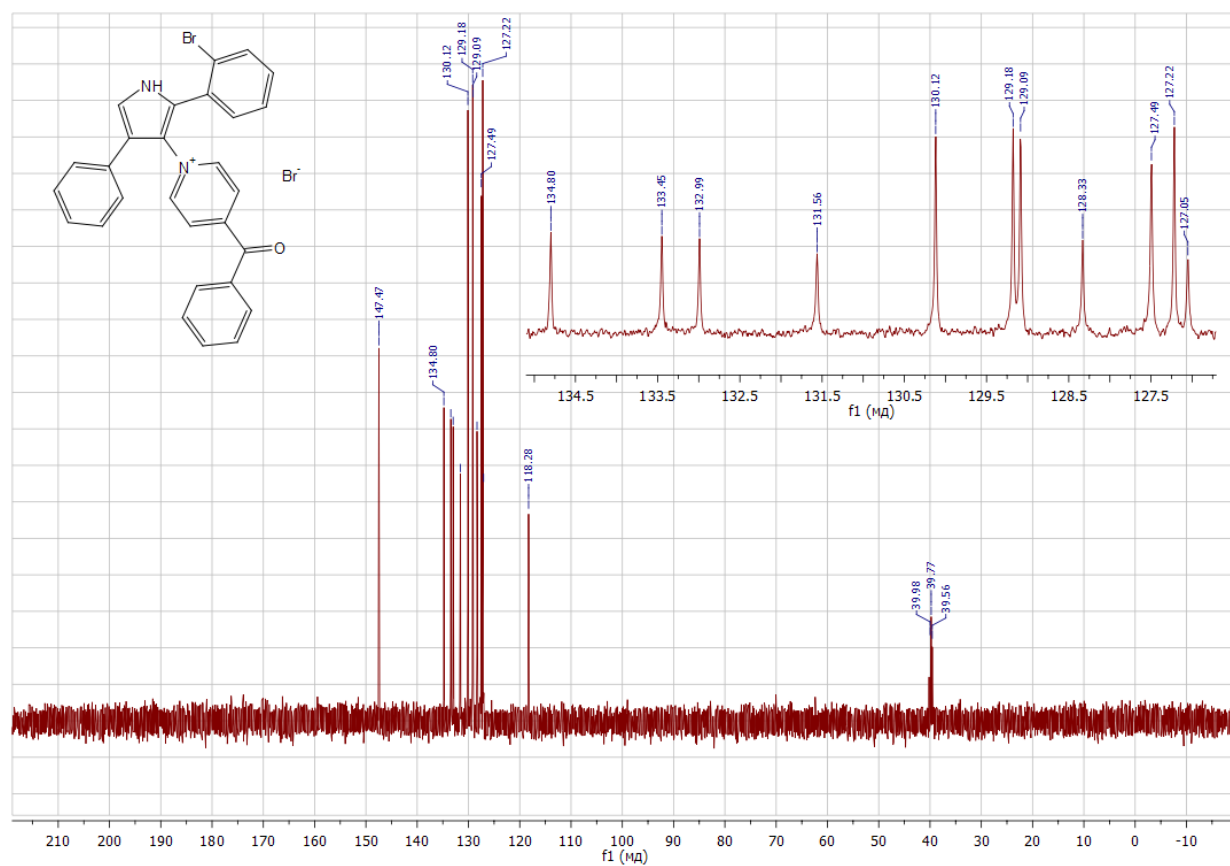

$^1\text{H}$  NMR (400 MHz,  $\text{DMSO}-d_6$ ) of 3-phenylpyrido[2,1-*a*]pyrrolo[3,2-*c*]isoquinolin-1-ium bromide (**17a**)

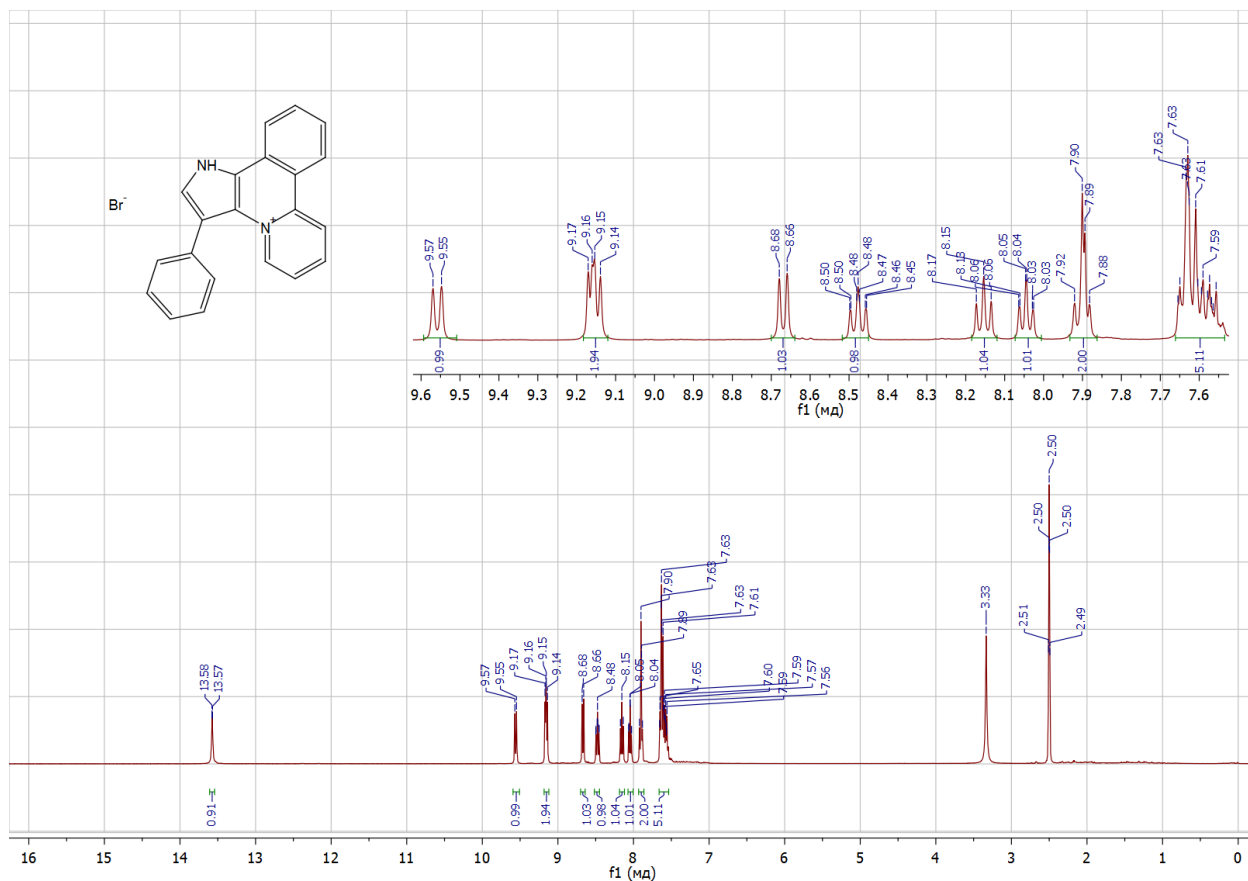

$^{13}\text{C}\{^1\text{H}\}$  NMR (101 MHz,  $\text{DMSO}-d_6$ ) of 3-phenylpyrido[2,1-*a*]pyrrolo[3,2-*c*]isoquinolin-1-ium bromide (**17a**)

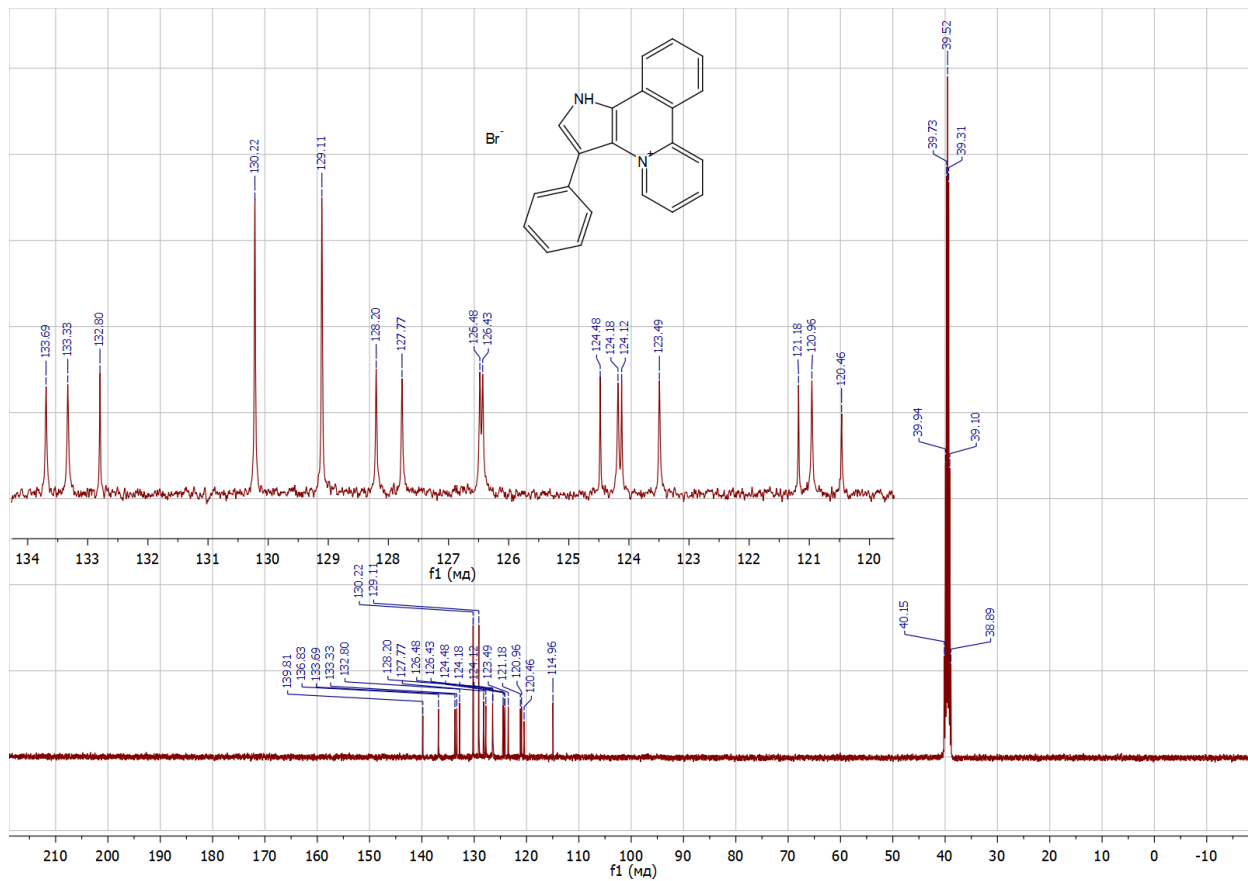

$^{13}\text{C}$  DEPT135 NMR (101 MHz,  $\text{DMSO-}d_6$ ) of 3-phenylpyrido[2,1-*a*]pyrrolo[3,2-*c*]isoquinolin-1-ium bromide (**17a**)

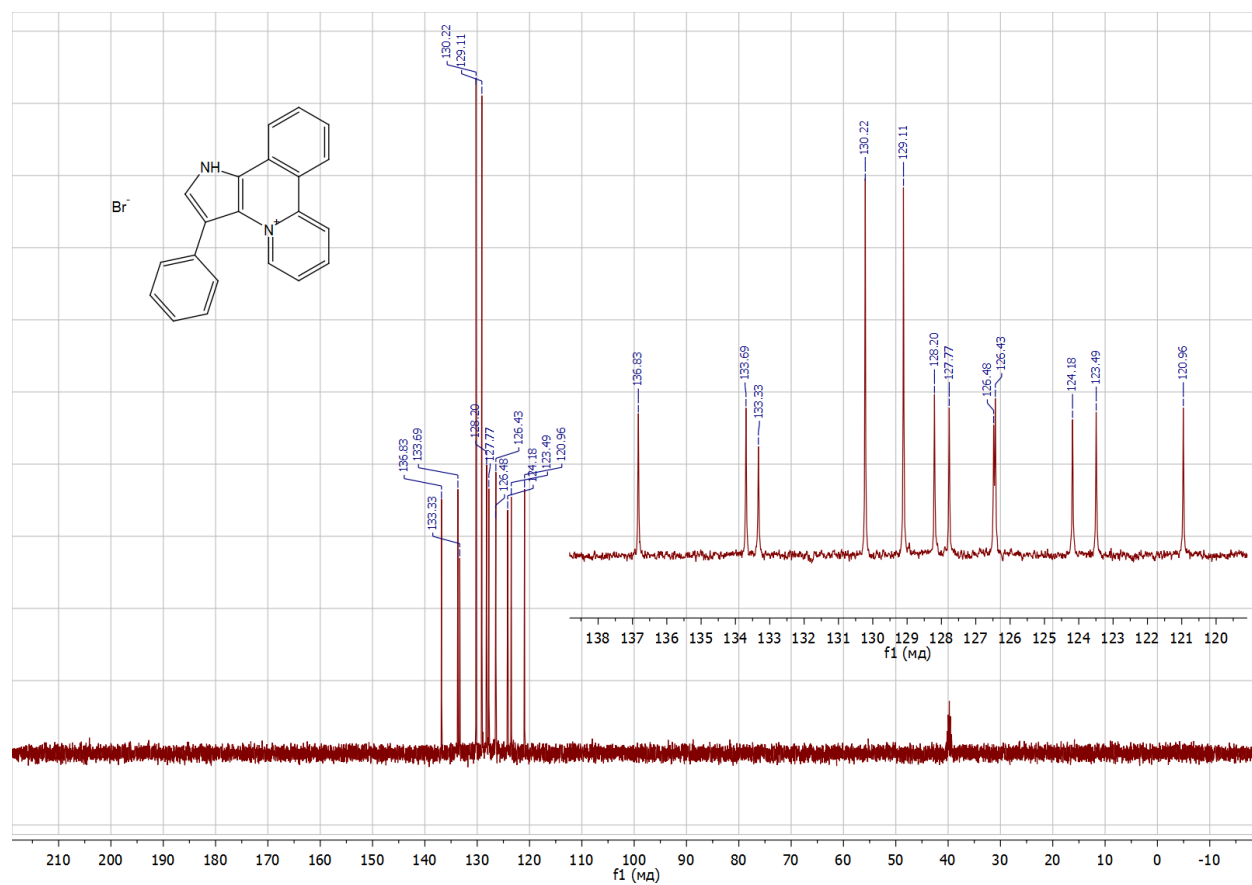

$^1\text{H}$  NMR (400 MHz,  $\text{DMSO-}d_6$ ) of 7-methyl-3-phenyl-1*H*-pyrido[2,1-*a*]pyrrolo[3,2-*c*]isoquinolin-4-ium bromide (**17b**)

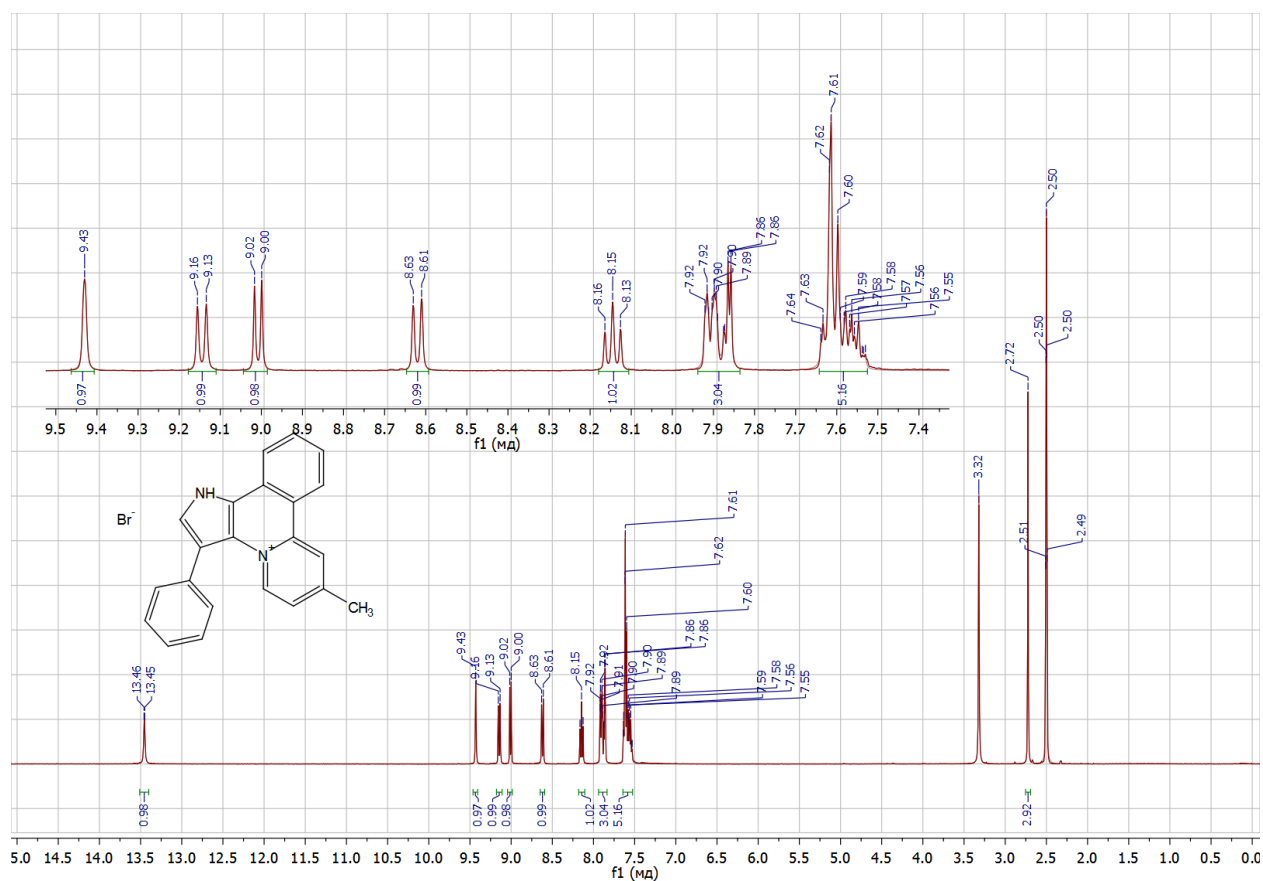

$^{13}\text{C}\{^1\text{H}\}$  NMR (101 MHz,  $\text{DMSO-}d_6$ ) of 7-methyl-3-phenyl-1*H*-pyrido[2,1-*a*]pyrrolo[3,2-*c*]isoquinolin-4-ium bromide (**17b**)

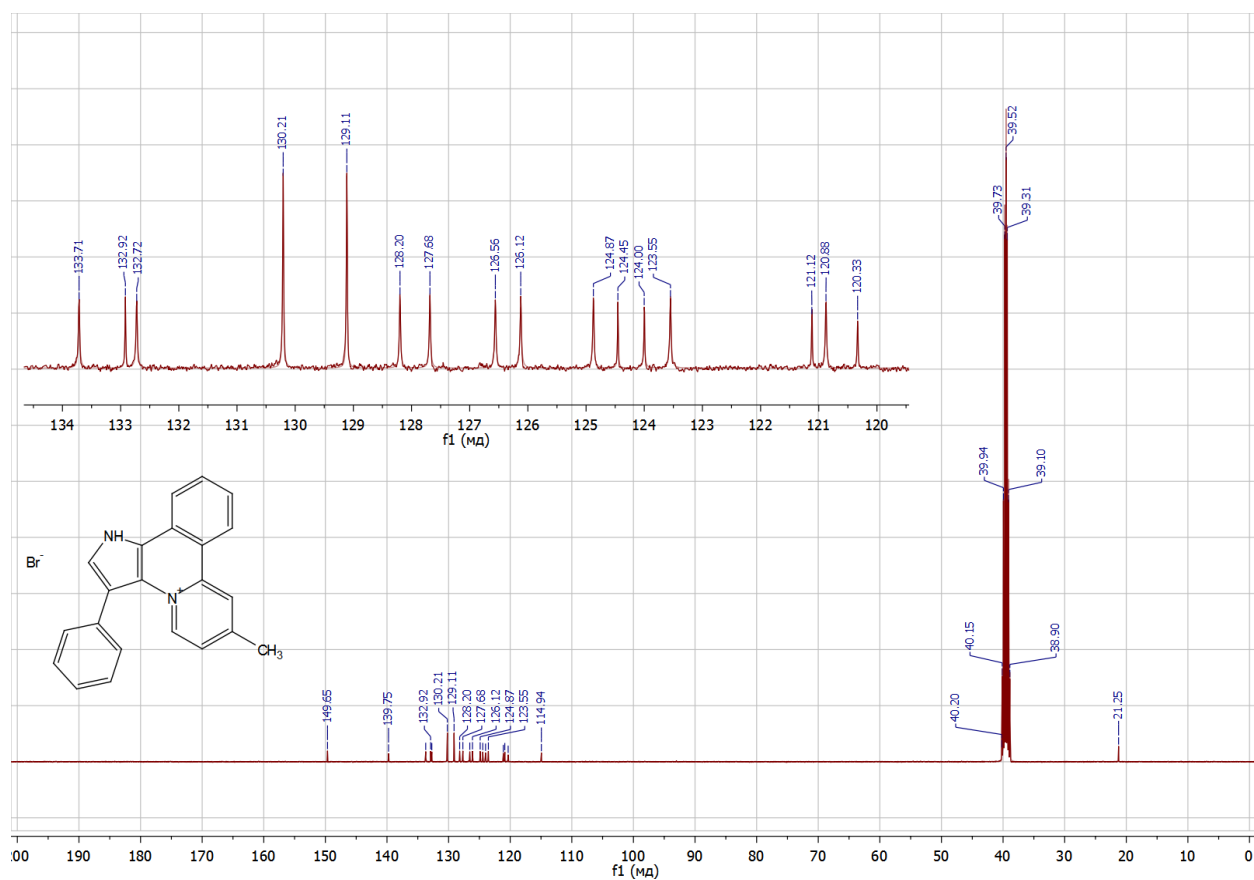

<sup>13</sup>C DEPT135 NMR (101 MHz, DMSO-*d*<sub>6</sub>) of 7-methyl-3-phenyl-1*H*-pyrido[2,1-*a*]pyrrolo[3,2-*c*]isoquinolin-4-ium bromide (**17b**)

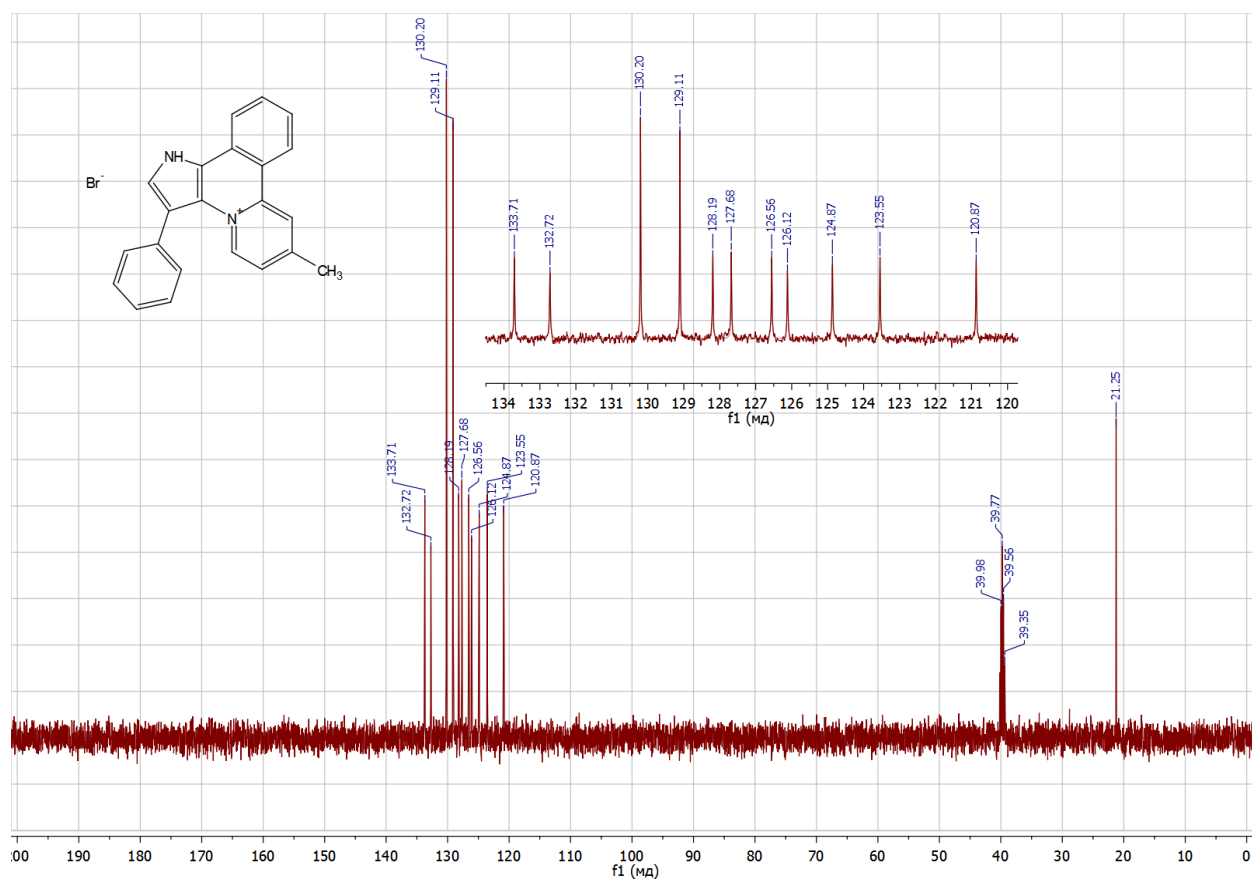



<sup>1</sup>H NMR (400 MHz, DMSO-*d*<sub>6</sub>) of 7-methoxy-3-phenyl-1*H*-pyrido[2,1-*a*]pyrrolo[3,2-*c*]isoquinolin-4-ium bromide (**17c**)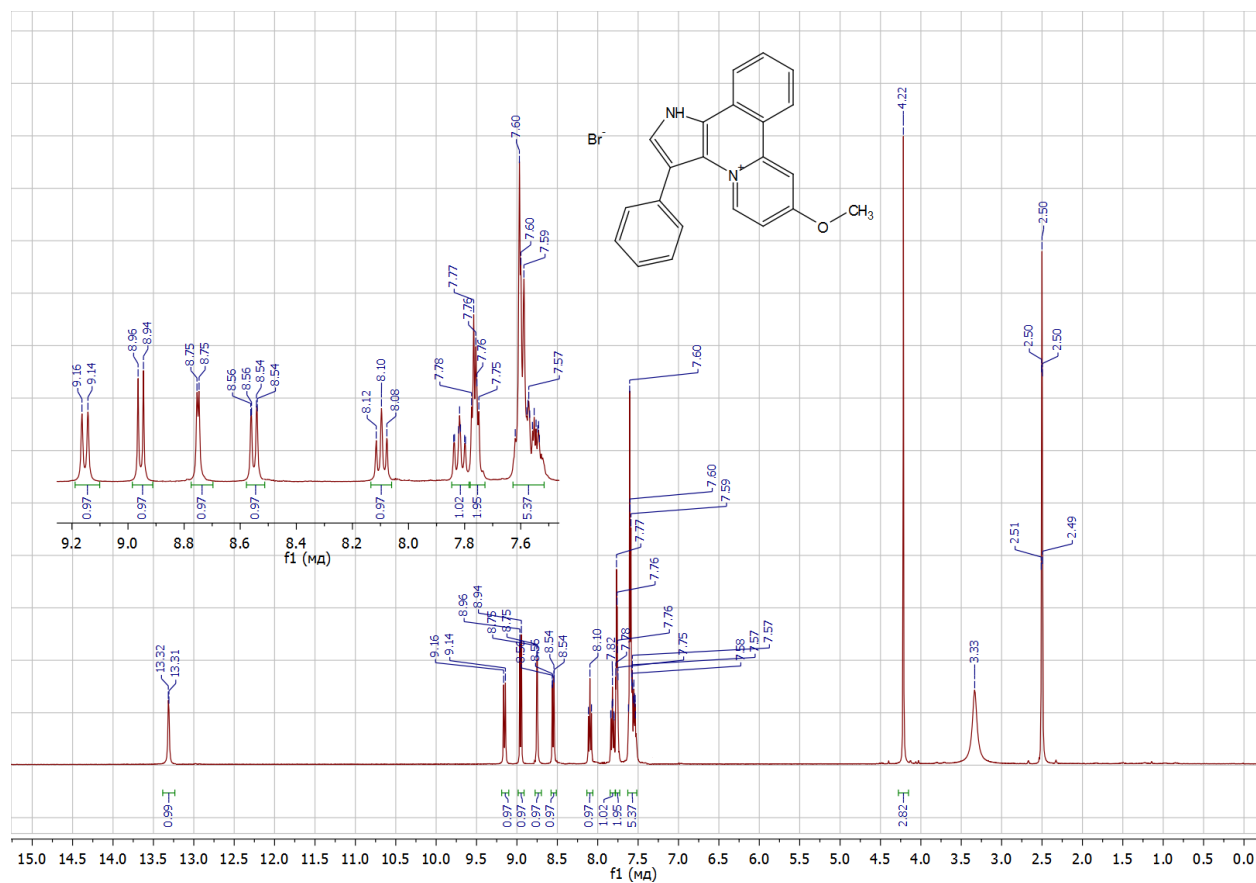<sup>13</sup>C{<sup>1</sup>H} NMR (101 MHz, DMSO-*d*<sub>6</sub>) of 7-methoxy-3-phenyl-1*H*-pyrido[2,1-*a*]pyrrolo[3,2-*c*]isoquinolin-4-ium bromide (**17c**)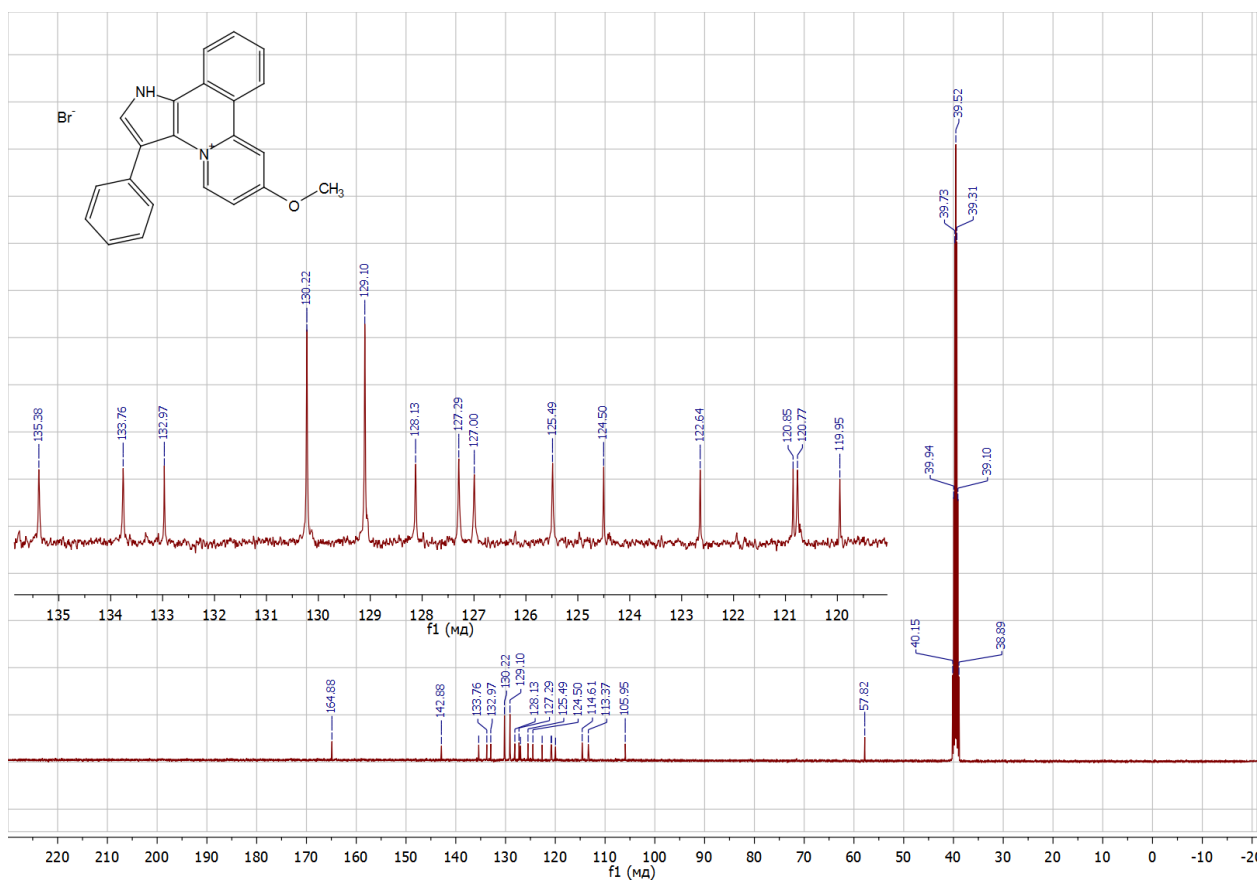

$^{13}\text{C}$  DEPT135 NMR (101 MHz,  $\text{DMSO-}d_6$ ) of 7-methoxy-3-phenyl-1*H*-pyrido[2,1-*a*]pyrrolo[3,2-*c*]isoquinolin-4-ium bromide (**17c**)

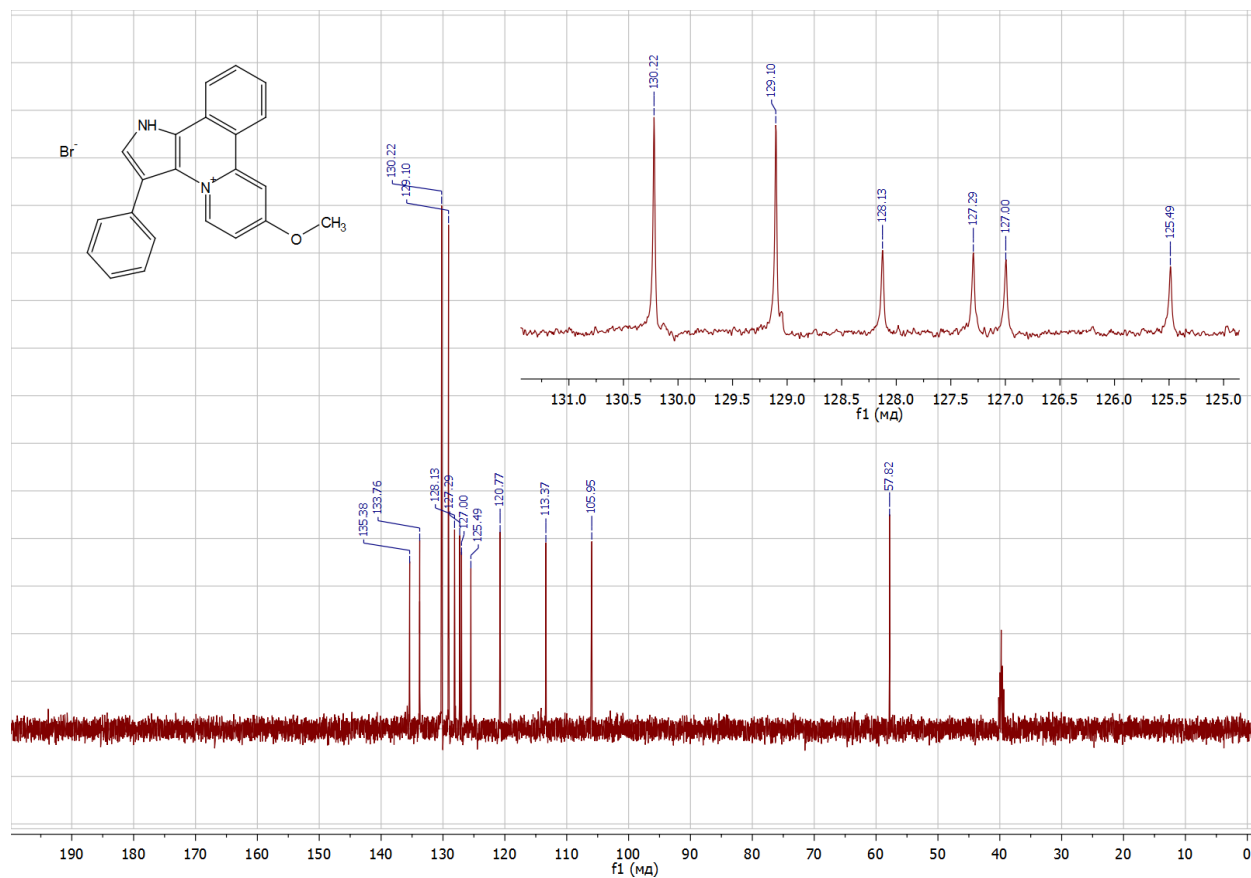

$^1\text{H}$  NMR (400 MHz,  $\text{DMSO}-d_6$ ) of 3,7-diphenylpyrido[2,1-*a*]pyrrolo[3,2-*c*]isoquinolin-1-ium bromide (**17d**)

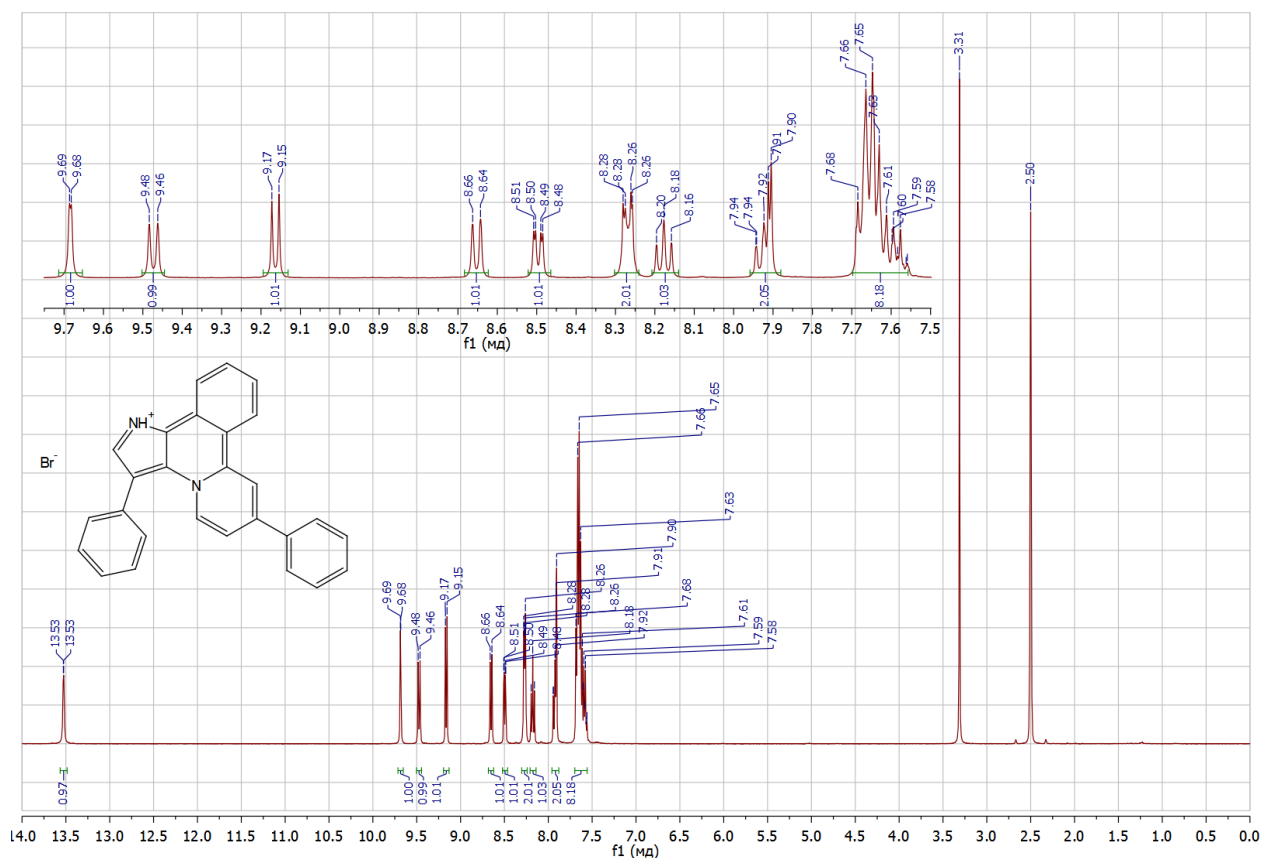

$^{13}\text{C}\{^1\text{H}\}$  NMR (101 MHz,  $\text{DMSO}-d_6$ ) of 3,7-diphenylpyrido[2,1-*a*]pyrrolo[3,2-*c*]isoquinolin-1-ium bromide (**17d**)

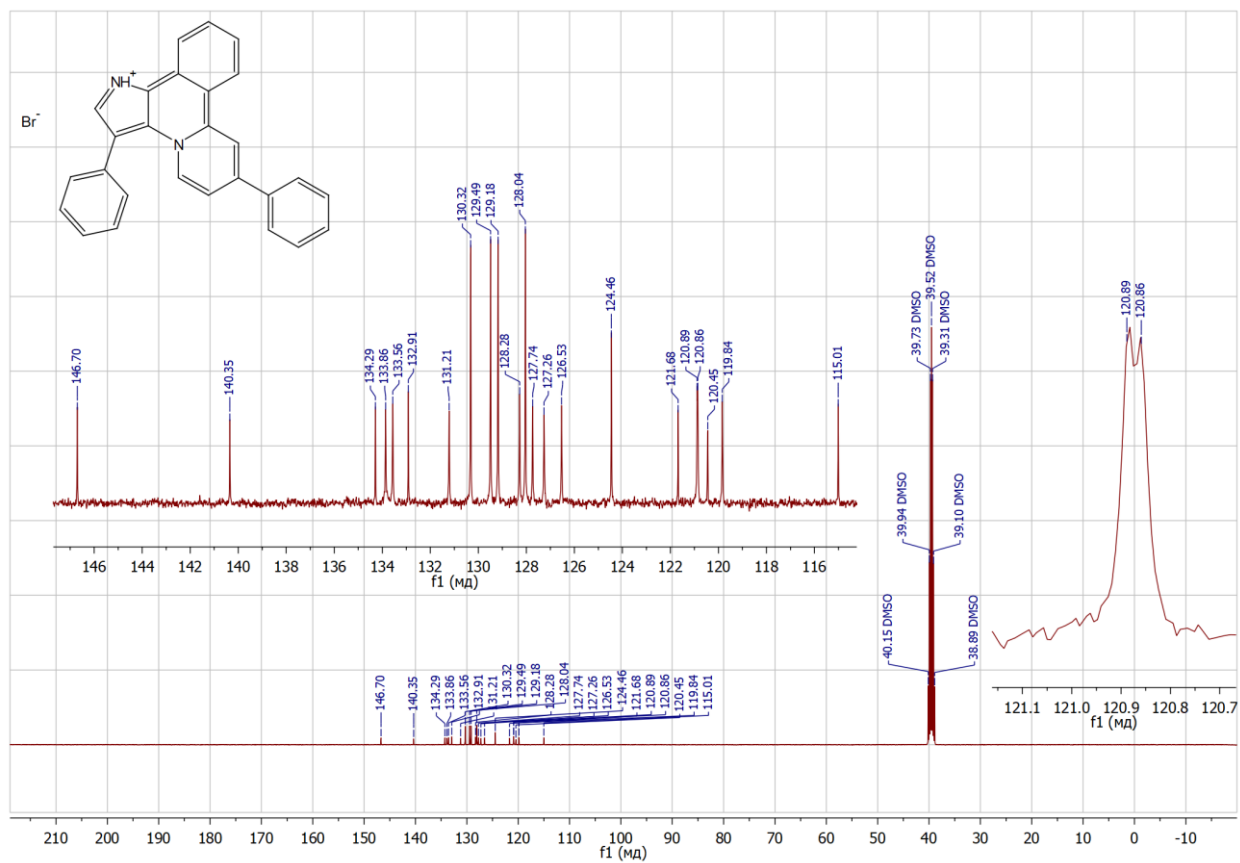

$^{13}\text{C}$  DEPT135 NMR (101 MHz,  $\text{DMSO}-d_6$ ) of 3,7-diphenylpyrido[2,1-*a*]pyrrolo[3,2-*c*]isoquinolin-1-ium bromide (**17d**)

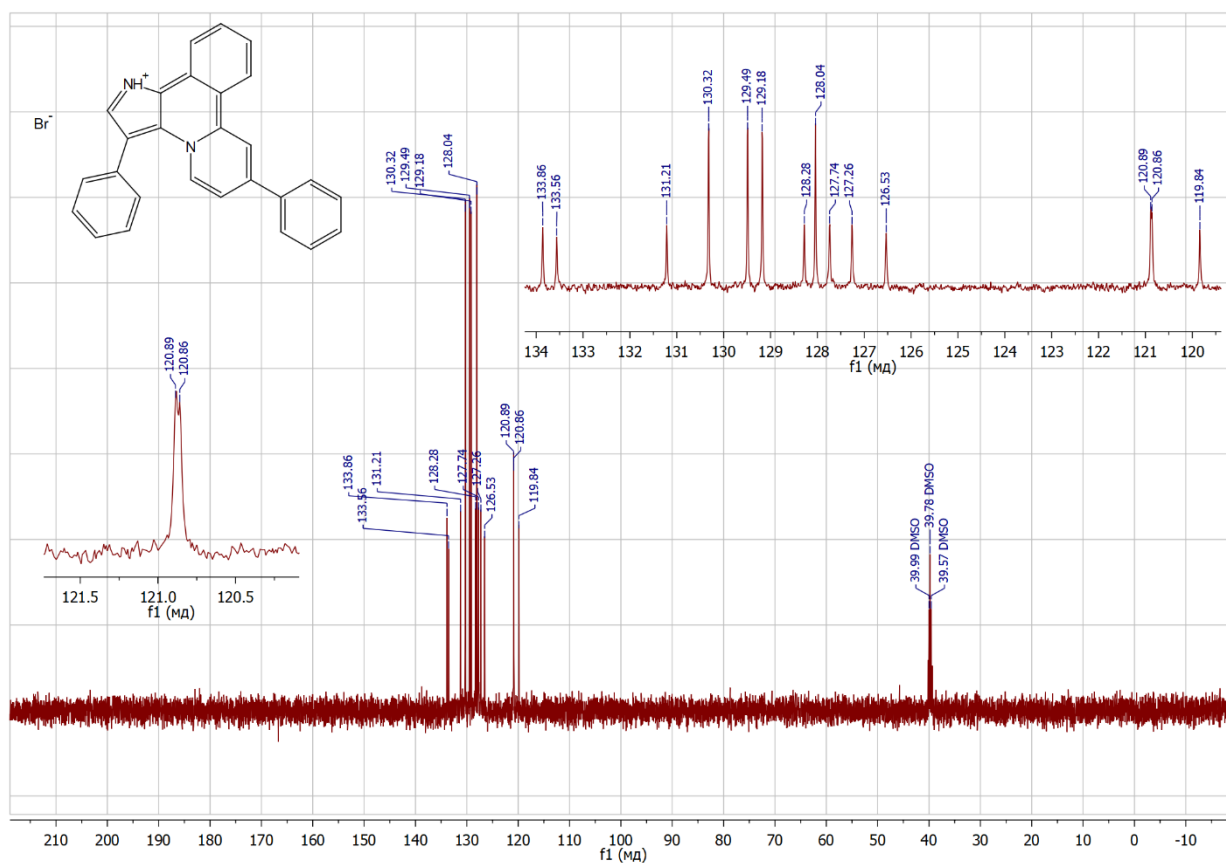

$^1\text{H}$  NMR (400 MHz,  $\text{DMSO-}d_6$ ) of 7-(4-methoxyphenyl)-3-phenyl-1*H*-pyrido[2,1-*a*]pyrrolo[3,2-*c*]isoquinolin-4-ium bromide (**17e**)

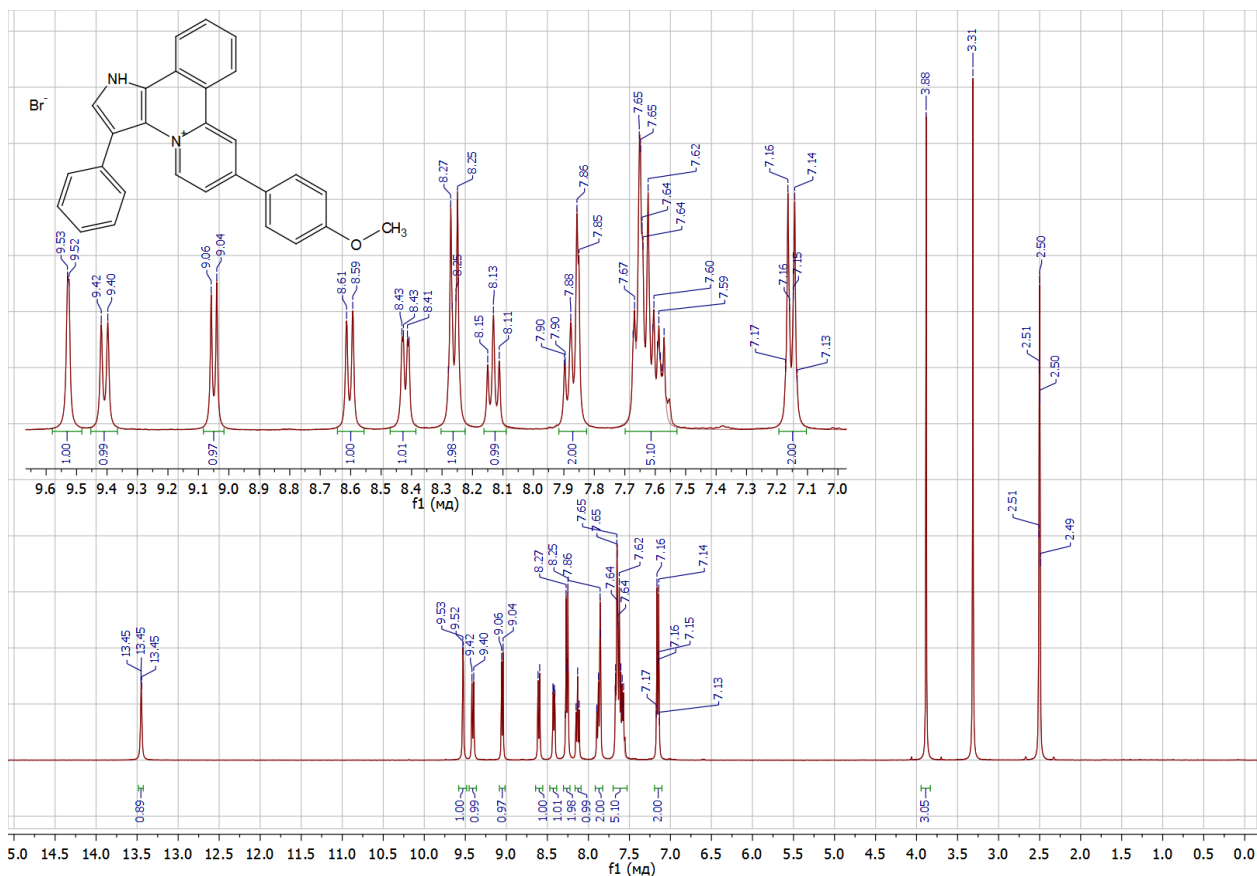

$^{13}\text{C}\{^1\text{H}\}$  NMR (101 MHz,  $\text{DMSO-}d_6$ ) of 7-(4-methoxyphenyl)-3-phenyl-1*H*-pyrido[2,1-*a*]pyrrolo[3,2-*c*]isoquinolin-4-ium bromide (**17e**)

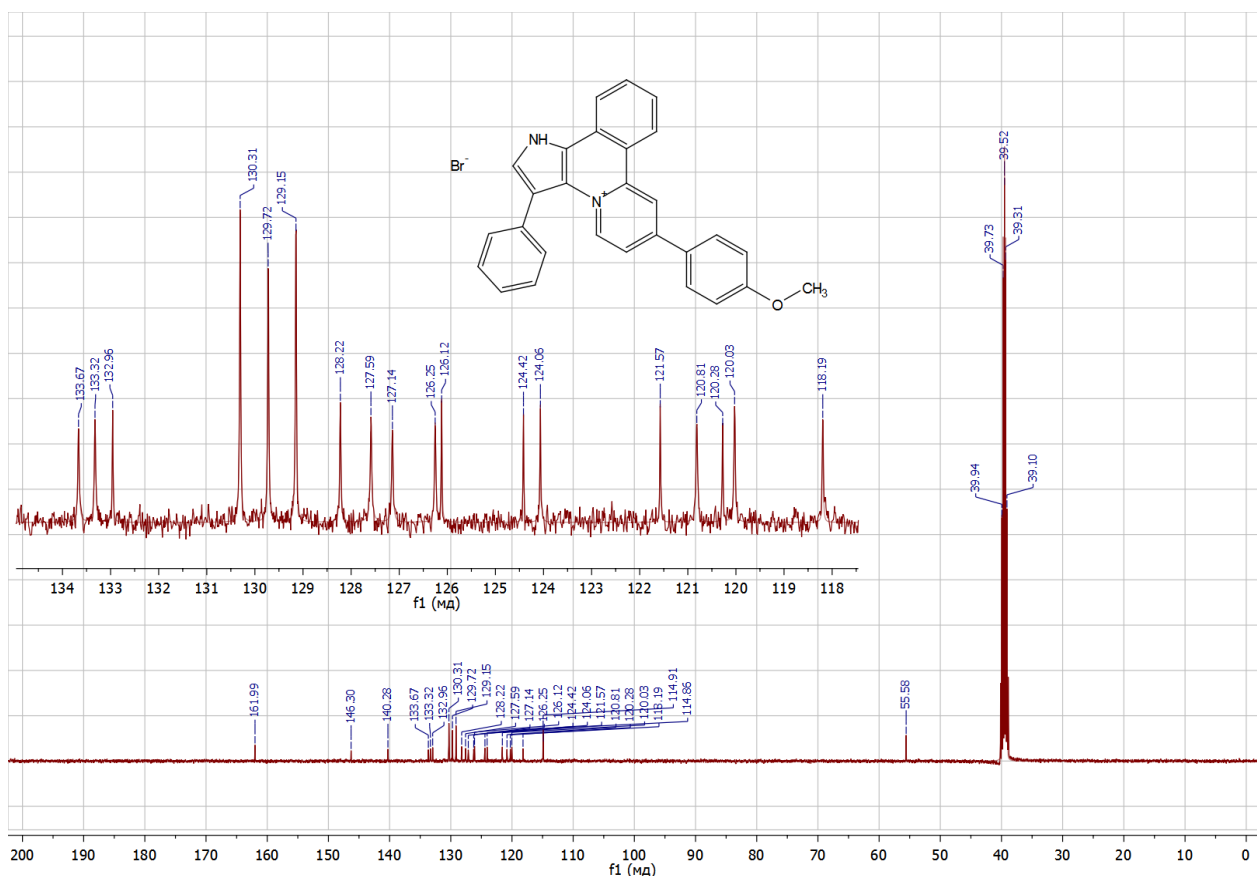

$^{13}\text{C}$  DEPT135 NMR (101 MHz,  $\text{DMSO-}d_6$ ) of 7-(4-methoxyphenyl)-3-phenyl-1*H*-pyrido[2,1-*a*]pyrrolo[3,2-*c*]isoquinolin-4-ium bromide (**17e**)

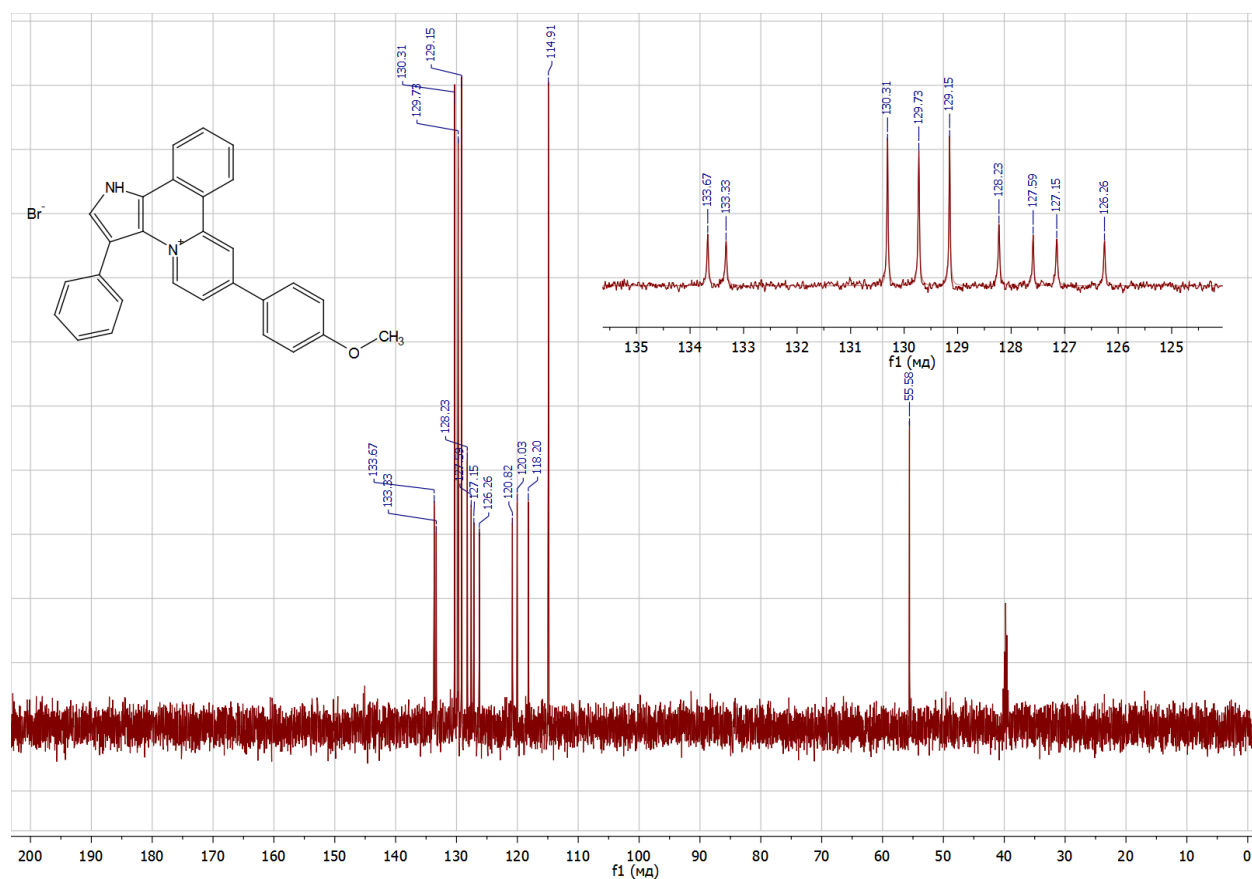

$^1\text{H}$  NMR (400 MHz,  $\text{DMSO}-d_6$ ) of 6,8-dimethyl-3-phenylpyrido[2,1-*a*]pyrrolo[3,2-*c*]isoquinolin-1-ium bromide (**17f**)

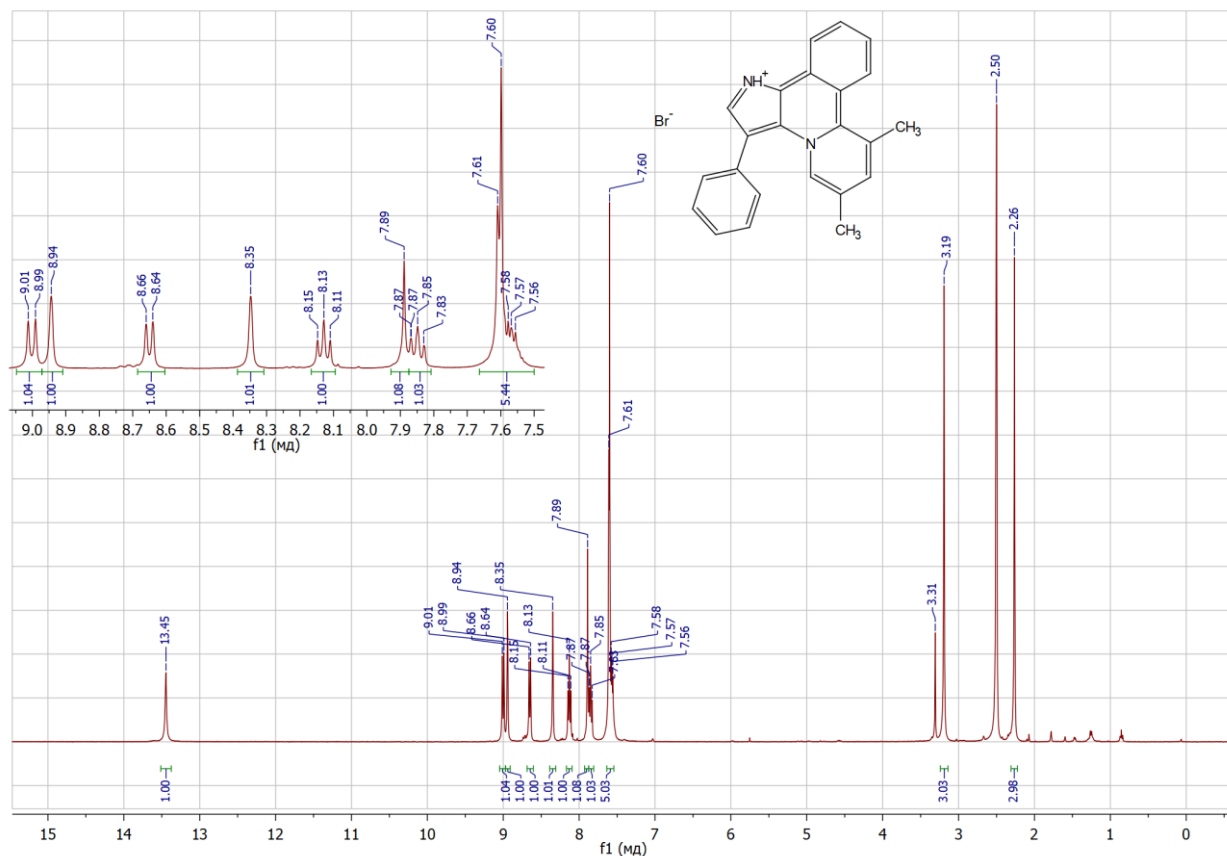

$^{13}\text{C}\{^1\text{H}\}$  NMR (101 MHz,  $\text{DMSO}-d_6$ ) of 6,8-dimethyl-3-phenylpyrido[2,1-*a*]pyrrolo[3,2-*c*]isoquinolin-1-ium bromide (**17f**)

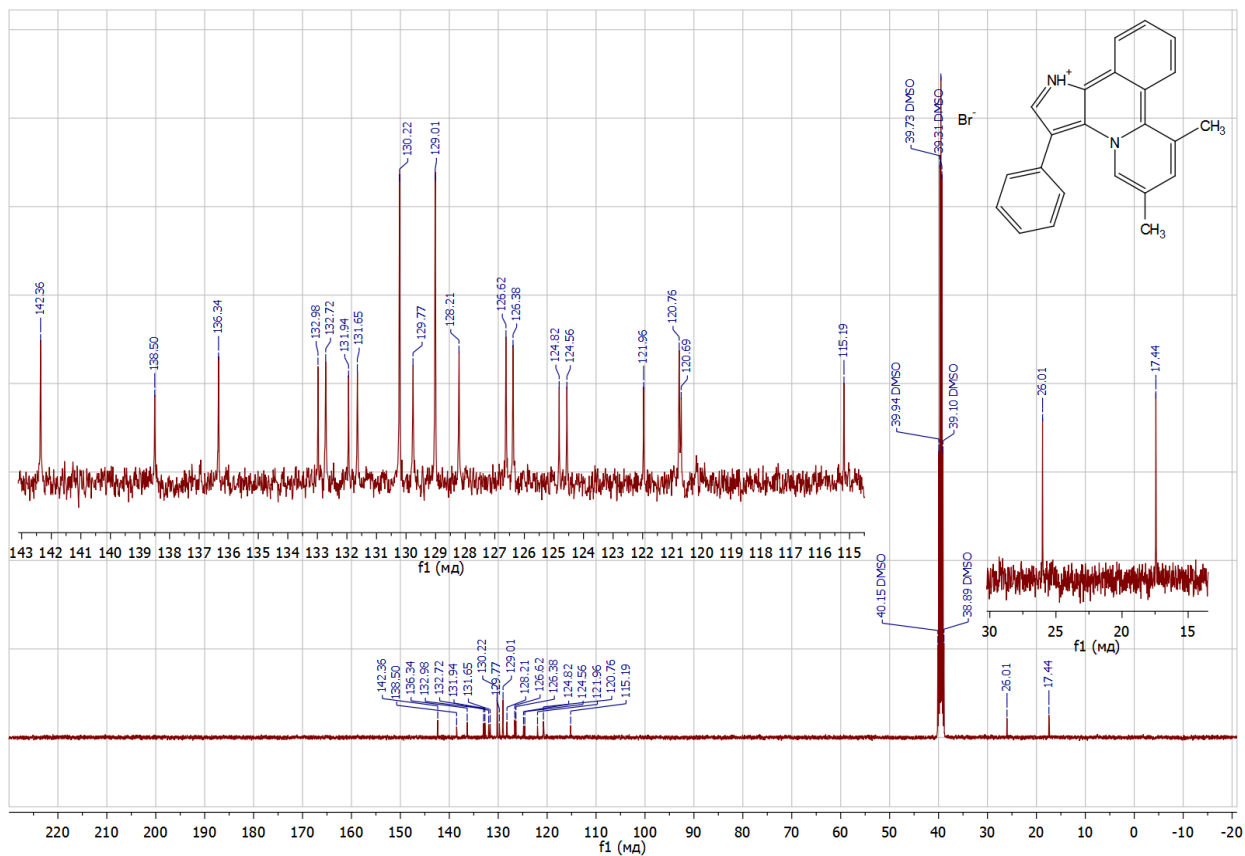

$^{13}\text{C}$  DEPT135 NMR (101 MHz,  $\text{DMSO-}d_6$ ) of 6,8-dimethyl-3-phenylpyrido[2,1-*a*]pyrrolo[3,2-*c*]isoquinolin-1-ium bromide (**17f**)

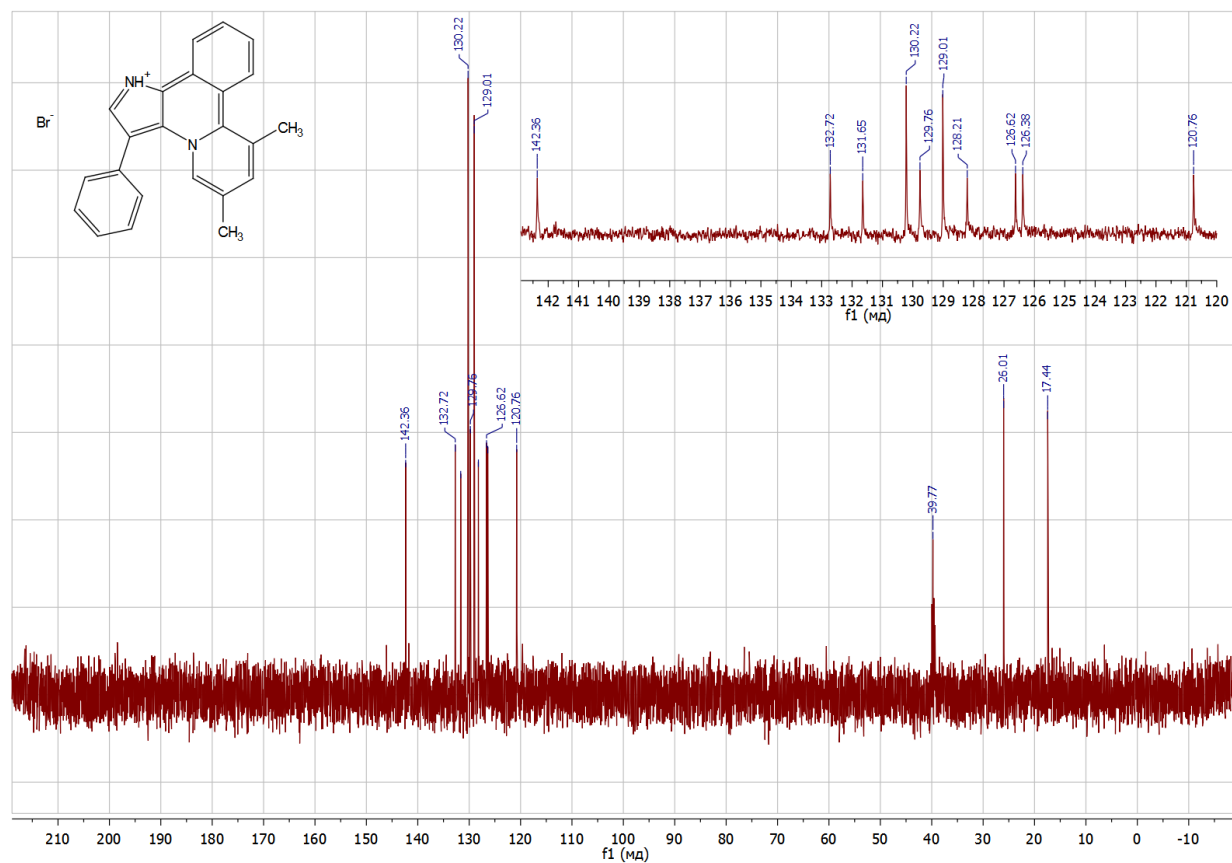



$^1\text{H}$  NMR (400 MHz,  $\text{DMSO}-d_6$ ) of 3-phenyl-1*H*-isoquinolino[1,2-*a*]pyrrolo[3,2-*c*]isoquinolin-4-ium bromide (**17g**)

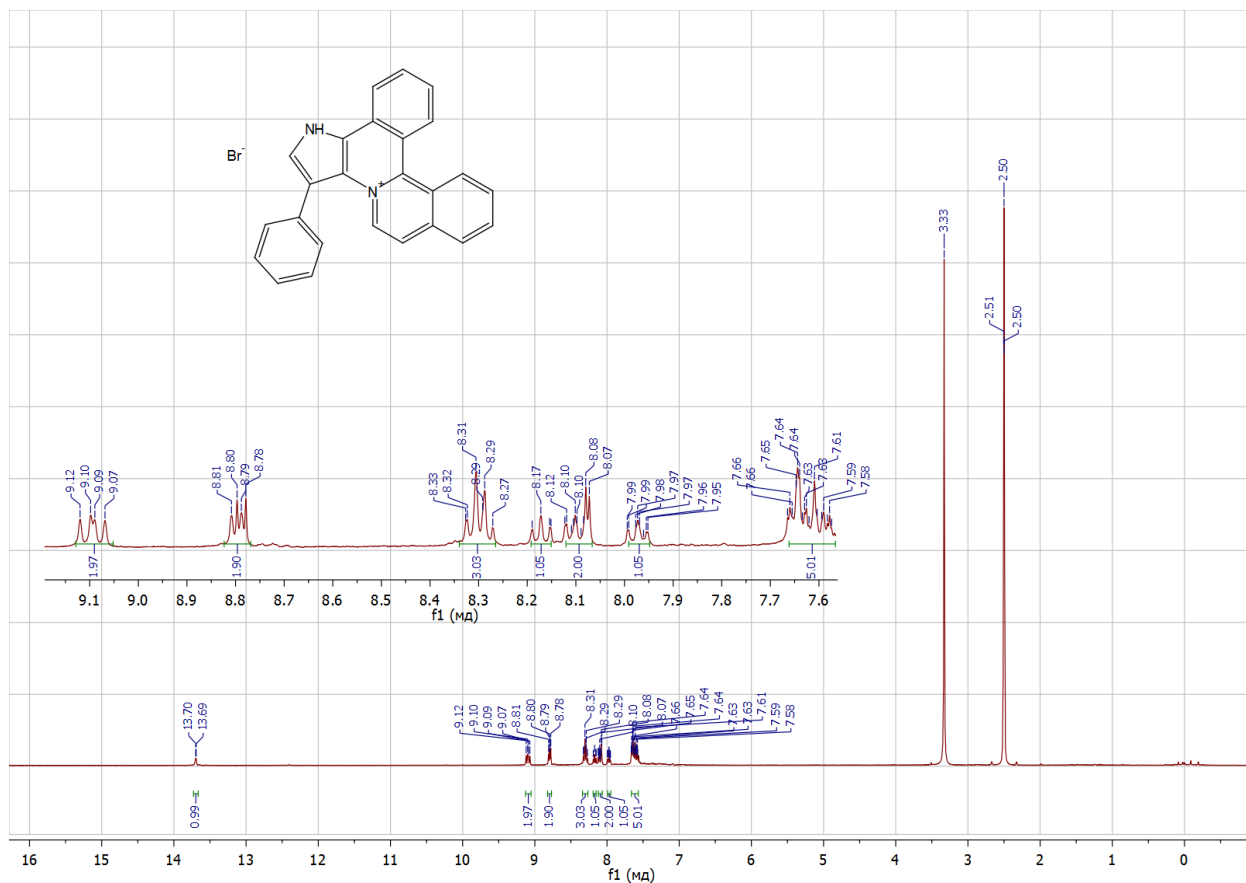

$^{13}\text{C}\{^1\text{H}\}$  NMR (101 MHz,  $\text{DMSO}-d_6$ ) of 3-phenyl-1*H*-isoquinolino[1,2-*a*]pyrrolo[3,2-*c*]isoquinolin-4-ium bromide (**17g**)

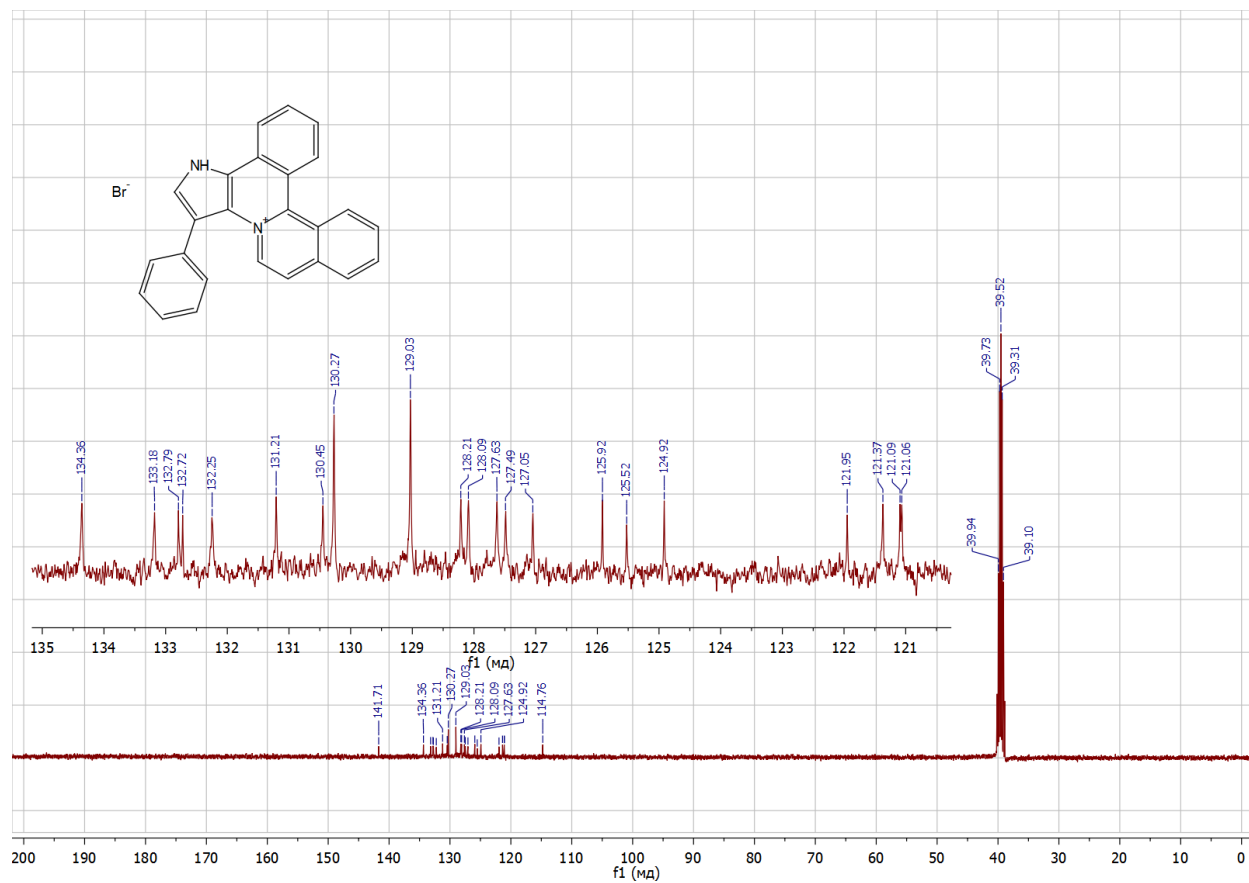

$^{13}\text{C}$  DEPT135 NMR (101 MHz,  $\text{DMSO-}d_6$ ) of 3-phenyl-1*H*-isoquinolino[1,2-*a*]pyrrolo[3,2-*c*]isoquinolin-4-ium bromide (**17g**)

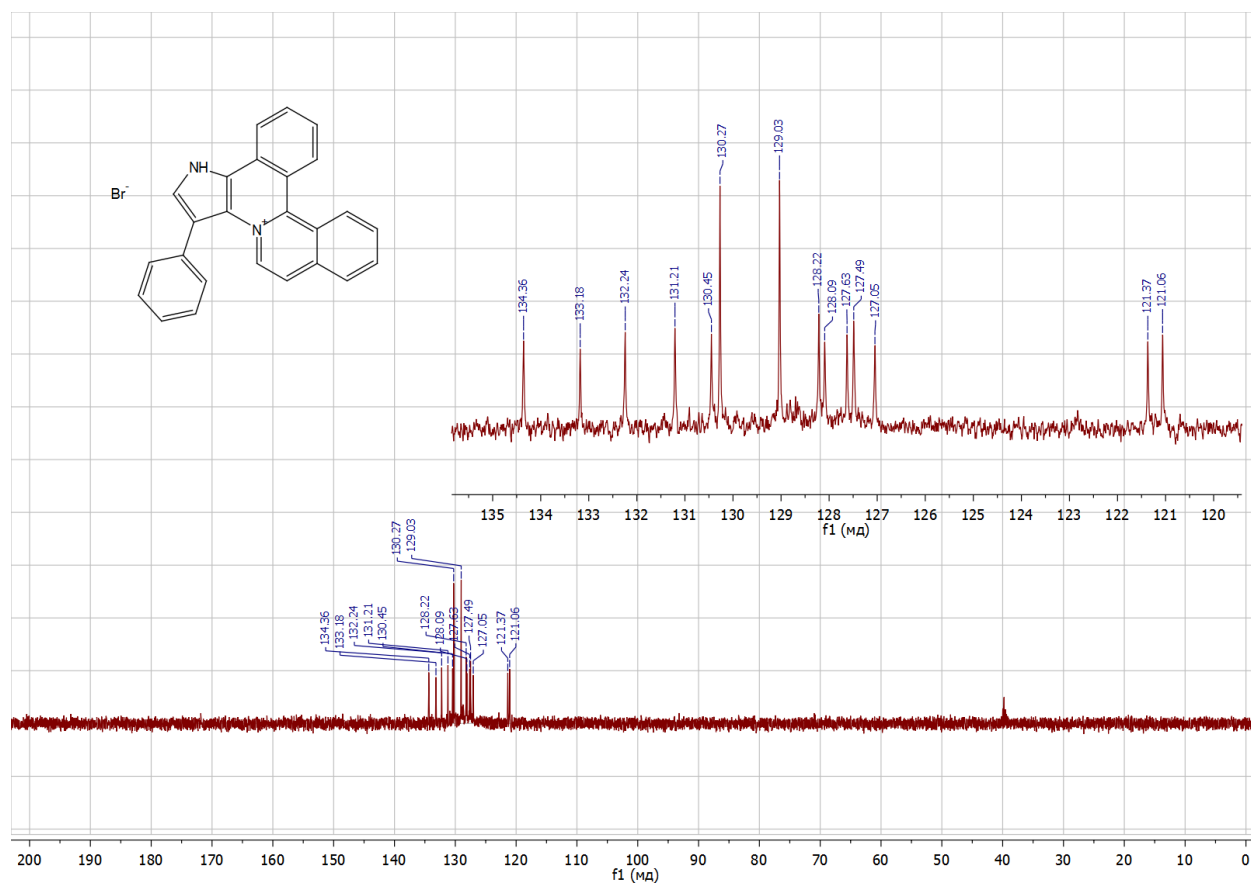

$^1\text{H}$  NMR (400 MHz,  $\text{DMSO-}d_6$ ) of 3-(4-methoxyphenyl)-1*H*-pyrido[2,1-*a*]pyrrolo[3,2-*c*]isoquinolin-4-ium bromide (**17h**)

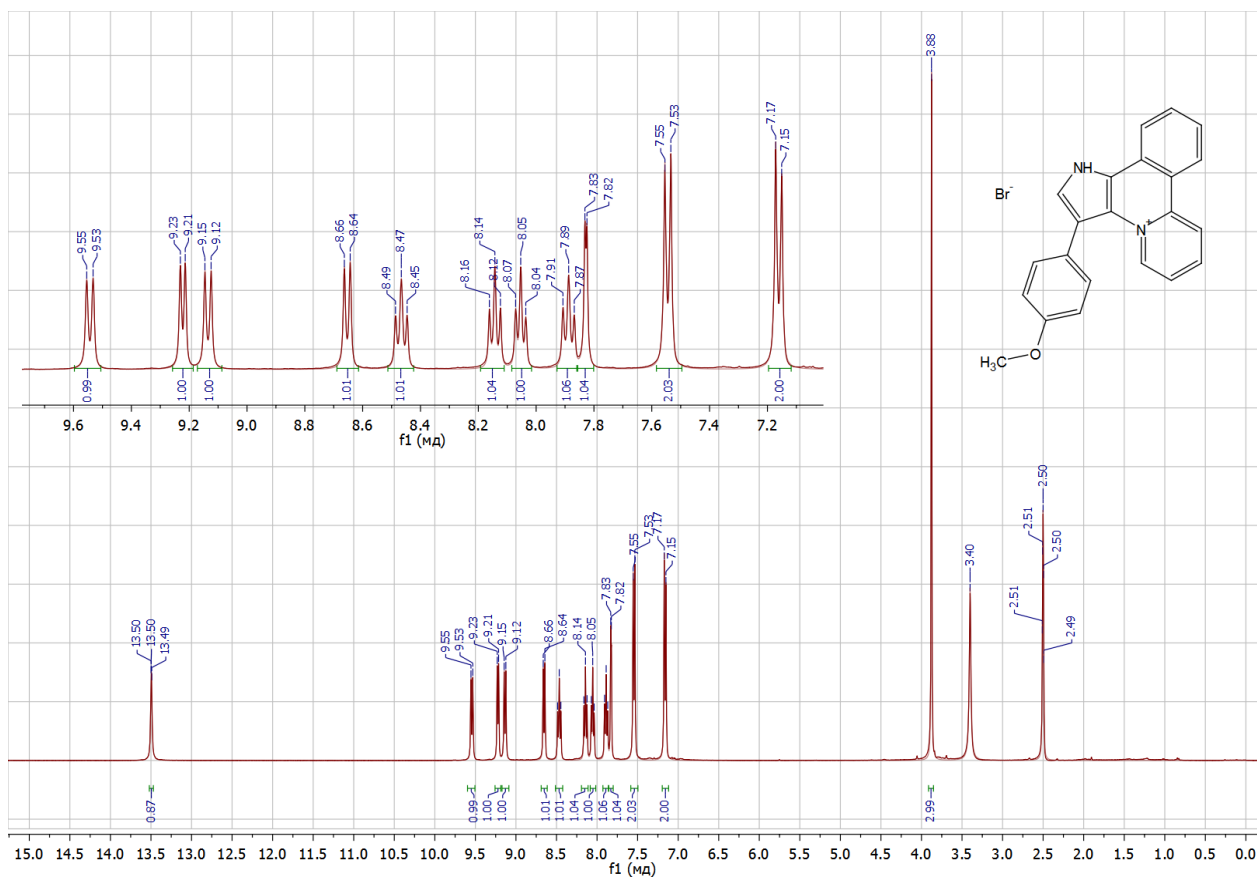

$^{13}\text{C}\{^1\text{H}\}$  NMR (101 MHz,  $\text{DMSO-}d_6$ ) of 3-(4-methoxyphenyl)-1*H*-pyrido[2,1-*a*]pyrrolo[3,2-*c*]isoquinolin-4-ium bromide (**17h**)

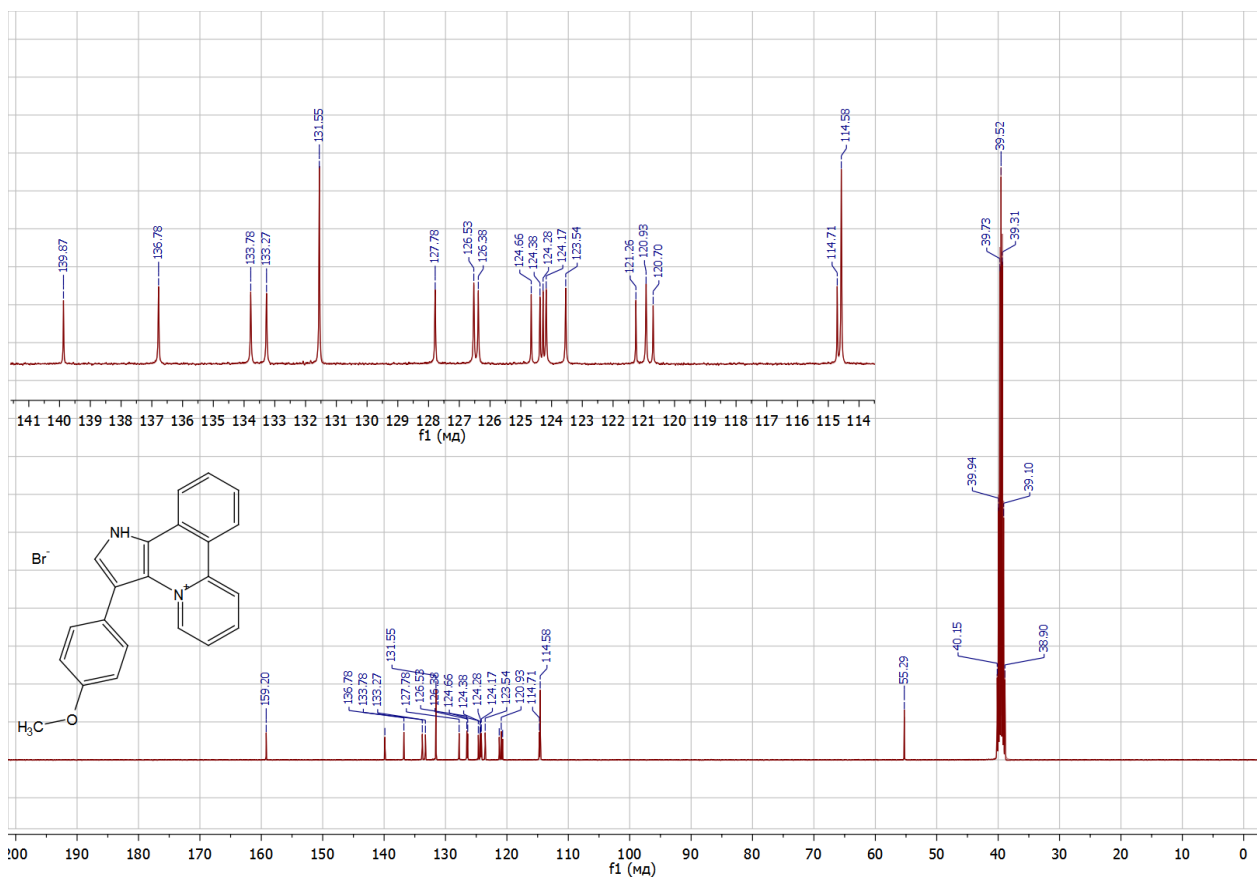

$^{13}\text{C}$  DEPT135 NMR (101 MHz,  $\text{DMSO}-d_6$ ) of 3-(4-methoxyphenyl)-1*H*-pyrido[2,1-*a*]pyrrolo[3,2-*c*]isoquinolin-4-ium bromide (**17h**)

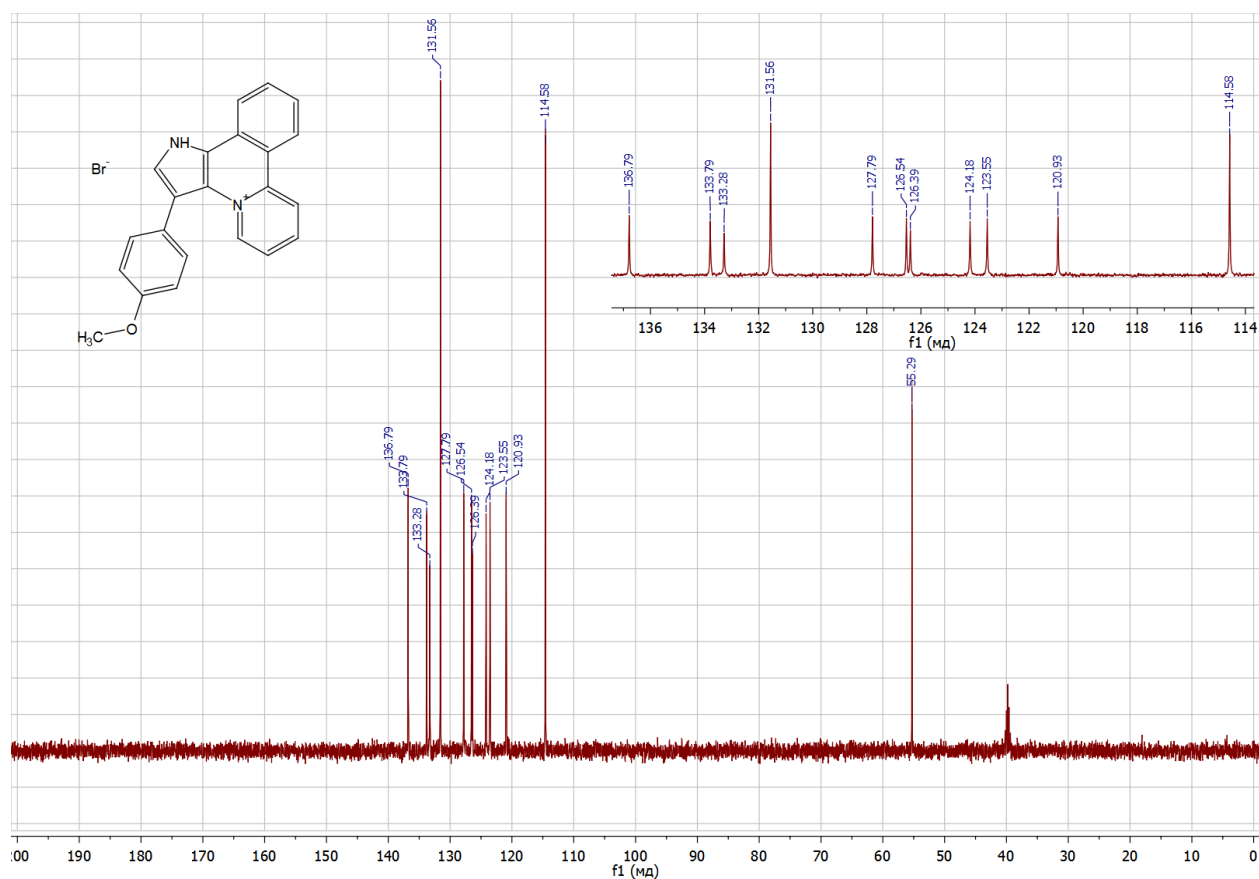

$^1\text{H}$  NMR (400 MHz,  $\text{DMSO}-d_6$ ) of 3-phenylpyrido[2,1-*a*]pyrrolo[3,2-*c*]isoquinoline (**18a**)

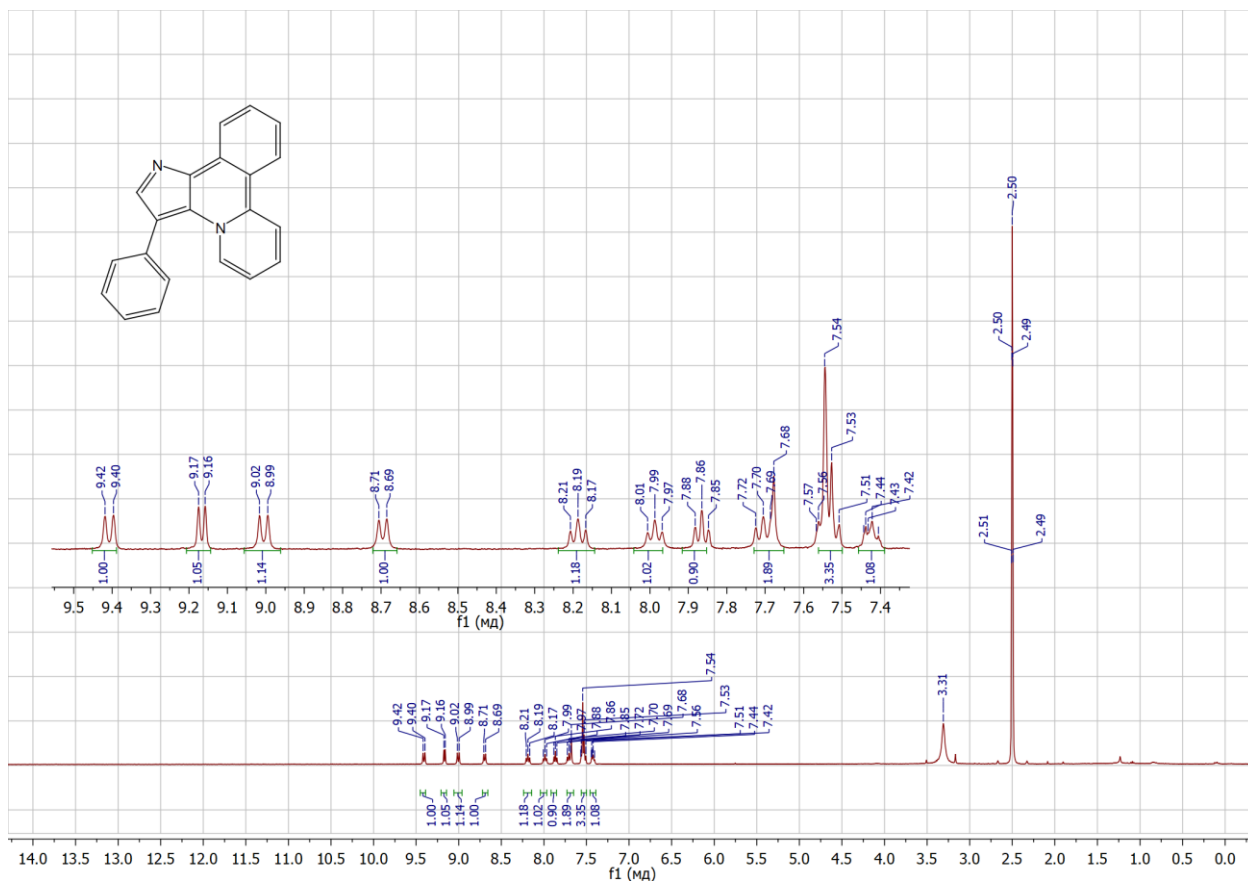

$^{13}\text{C}\{^1\text{H}\}$  NMR (101 MHz,  $\text{DMSO}-d_6$ ) of 3-phenylpyrido[2,1-*a*]pyrrolo[3,2-*c*]isoquinoline (**18a**)

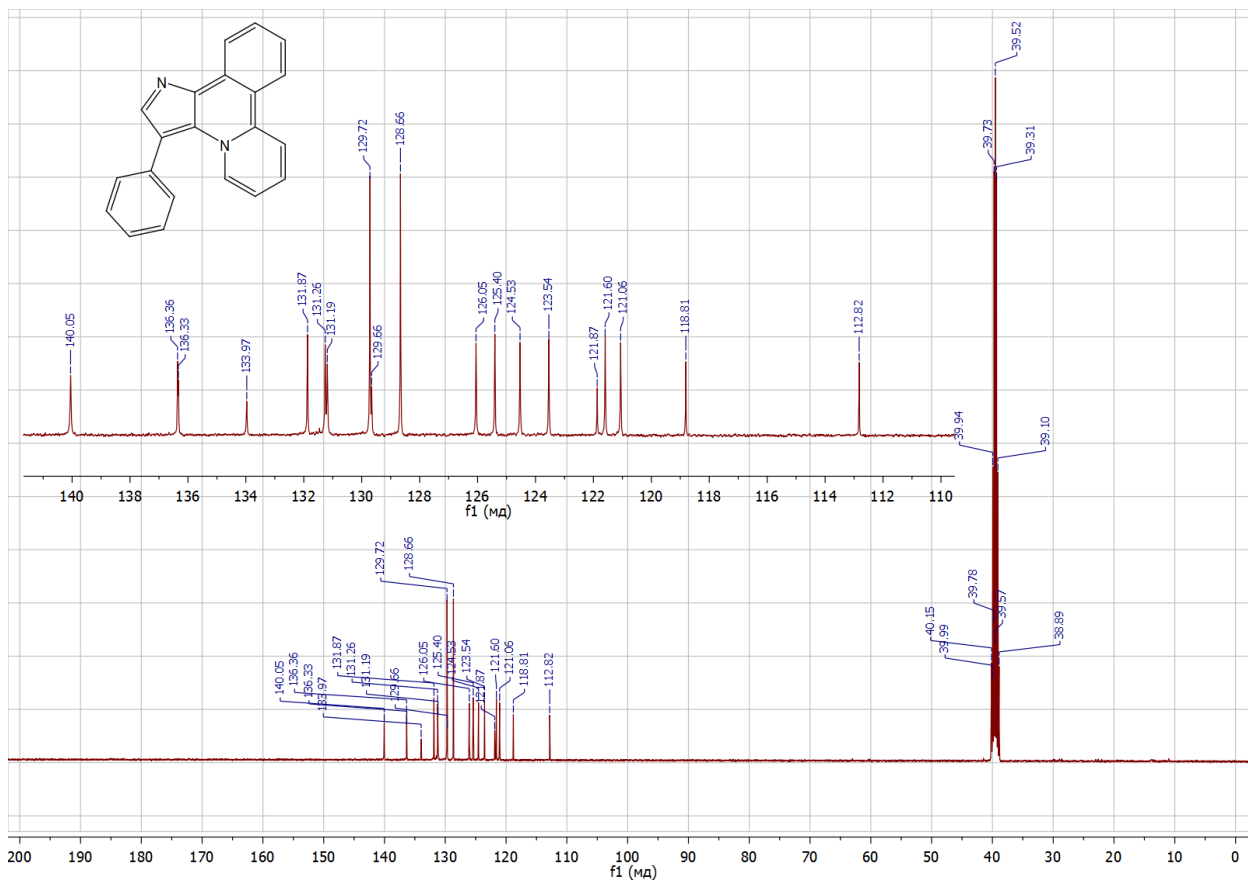

$^{13}\text{C}$  DEPT135 NMR (101 MHz,  $\text{DMSO-}d_6$ ) of 3-phenylpyrido[2,1-*a*]pyrrolo[3,2-*c*]isoquinoline (**18a**)

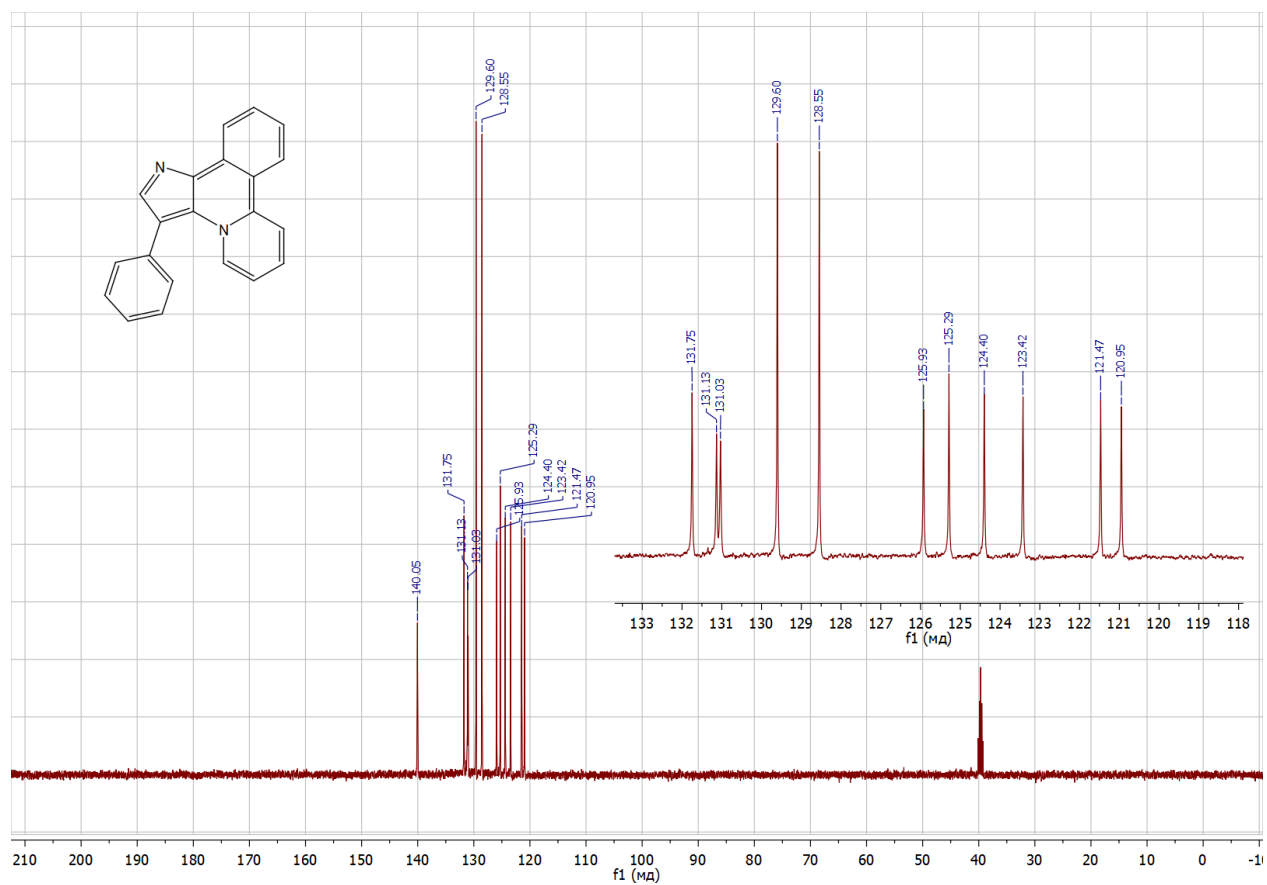

$^1\text{H}$  NMR (400 MHz,  $\text{DMSO}-d_6$ ) of 7-methoxy-3-phenylpyrido[2,1-*a*]pyrrolo[3,2-*c*]isoquinoline (**18c**)

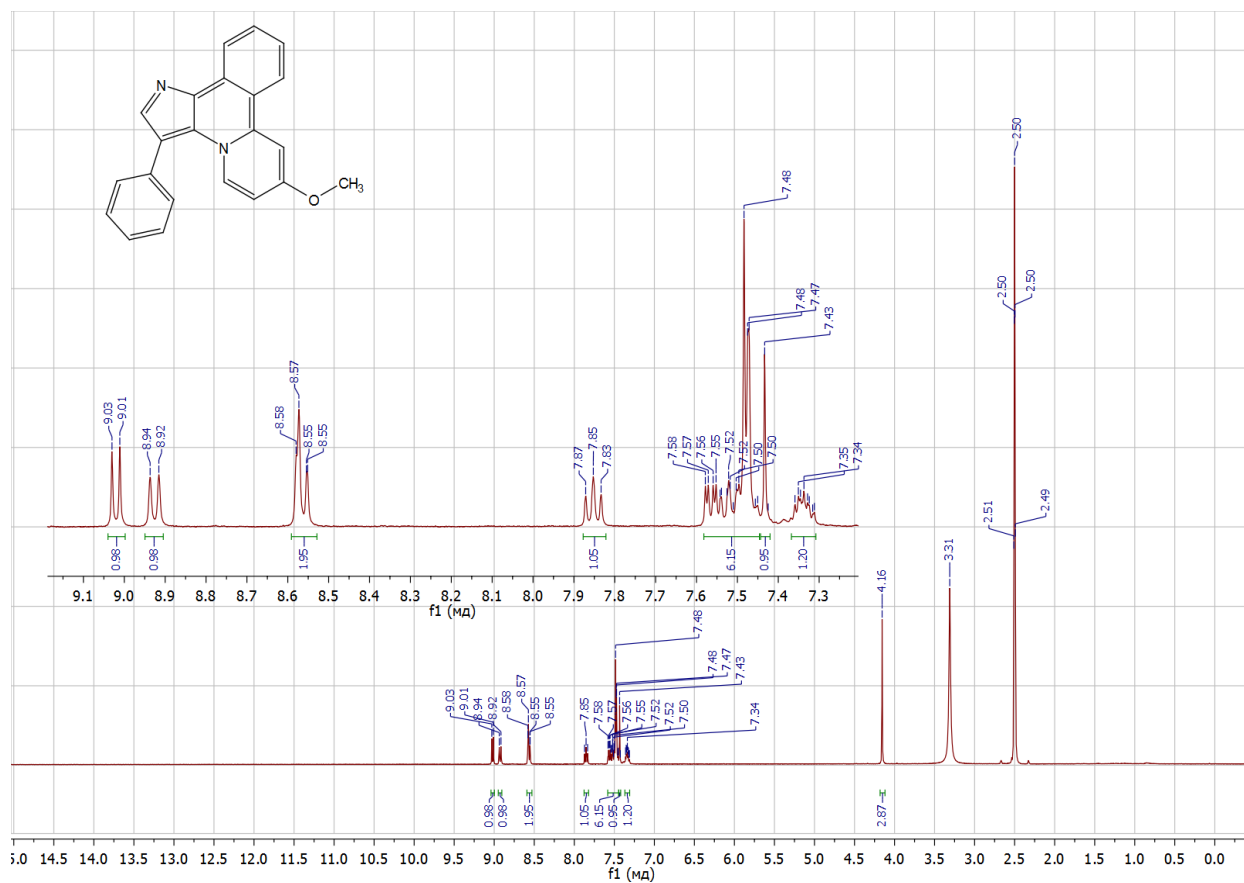

$^{13}\text{C}\{^1\text{H}\}$  NMR (101 MHz,  $\text{DMSO}-d_6$ ) of 7-methoxy-3-phenylpyrido[2,1-*a*]pyrrolo[3,2-*c*]isoquinoline (**18c**)

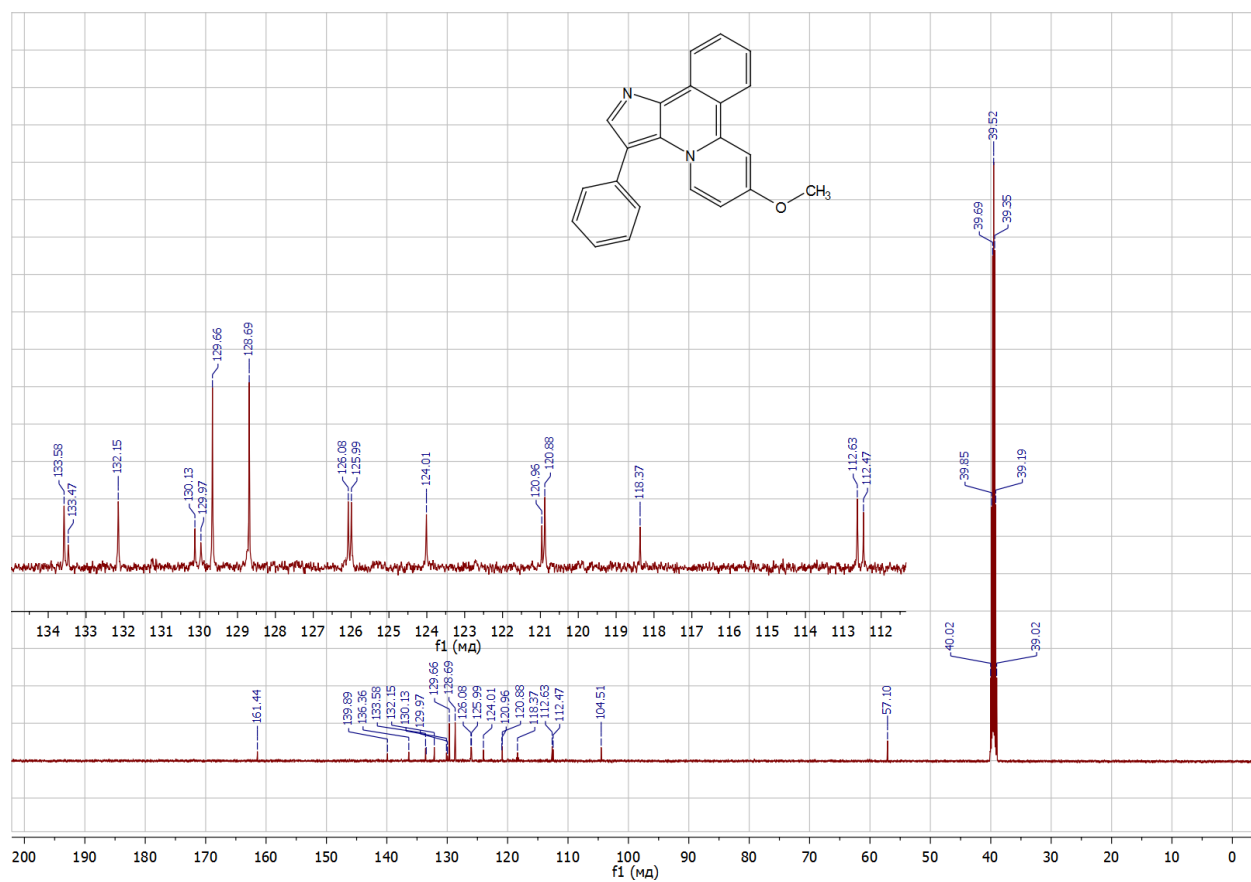

$^{13}\text{C}$  DEPT135 NMR (101 MHz,  $\text{DMSO-}d_6$ ) of 7-methoxy-3-phenylpyrido[2,1-*a*]pyrrolo[3,2-*c*]isoquinoline (**18c**)

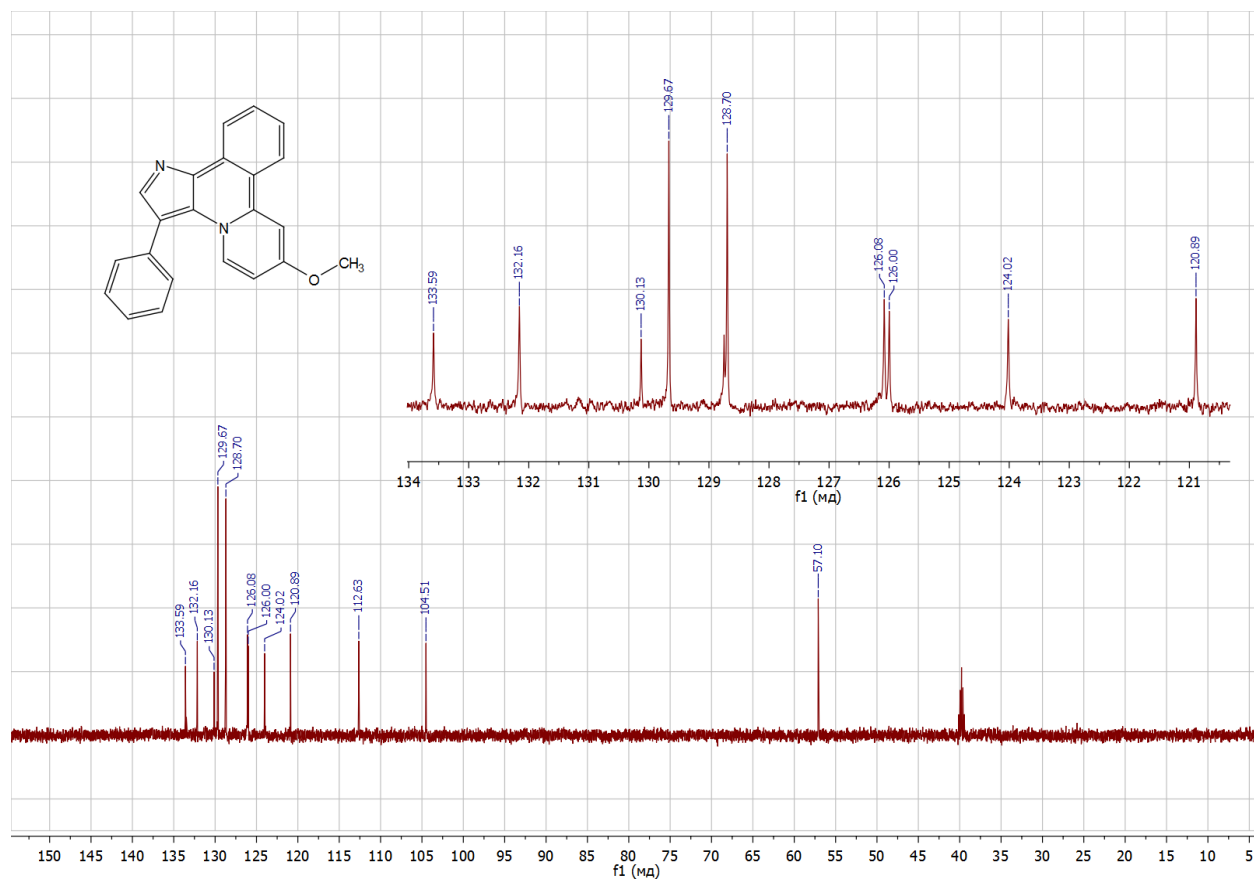



$^1\text{H}$  NMR (400 MHz,  $\text{DMSO}-d_6$ ) of 3,7-diphenylpyrido[2,1-*a*]pyrrolo[3,2-*c*]isoquinoline (**18d**)

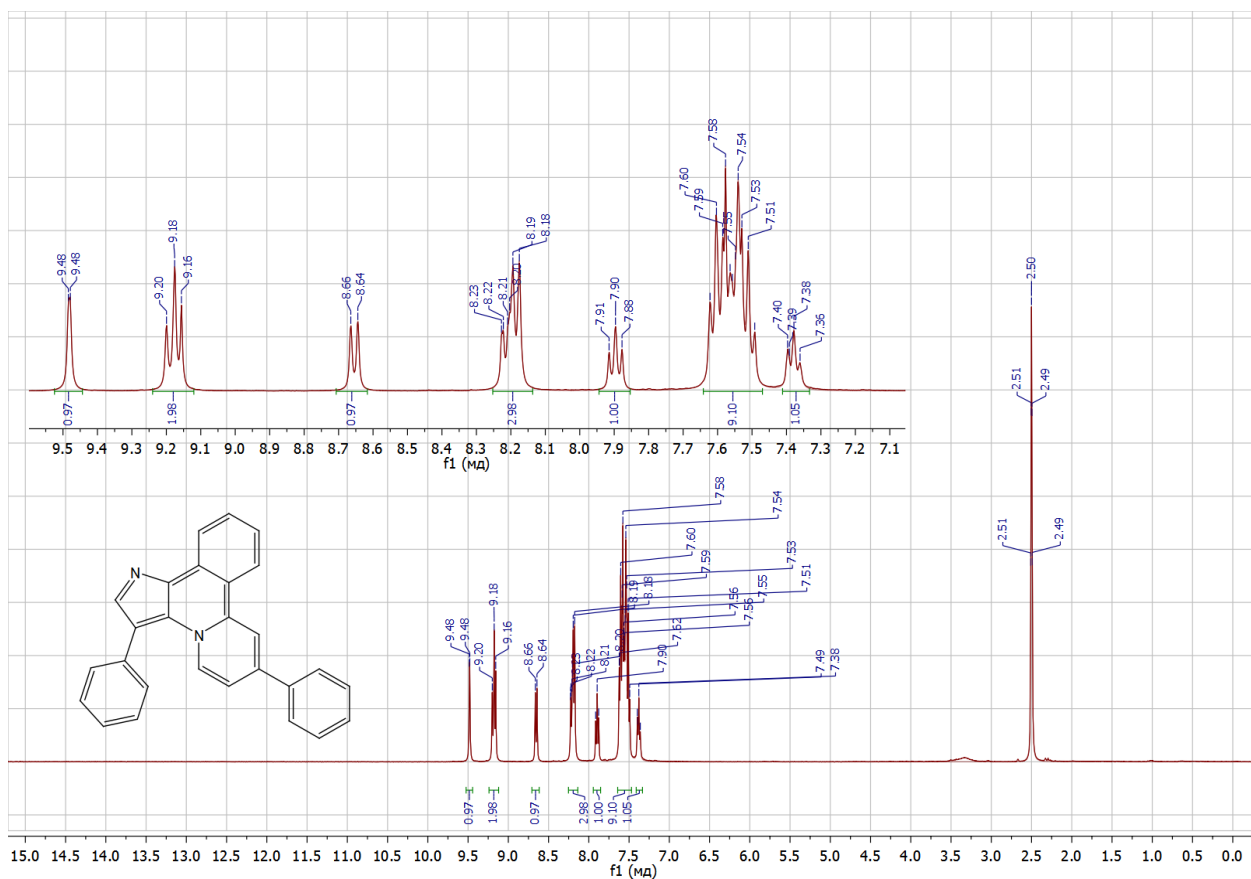

$^{13}\text{C}\{^1\text{H}\}$  NMR (101 MHz,  $\text{DMSO}-d_6$ ) of 3,7-diphenylpyrido[2,1-*a*]pyrrolo[3,2-*c*]isoquinoline (**18d**)

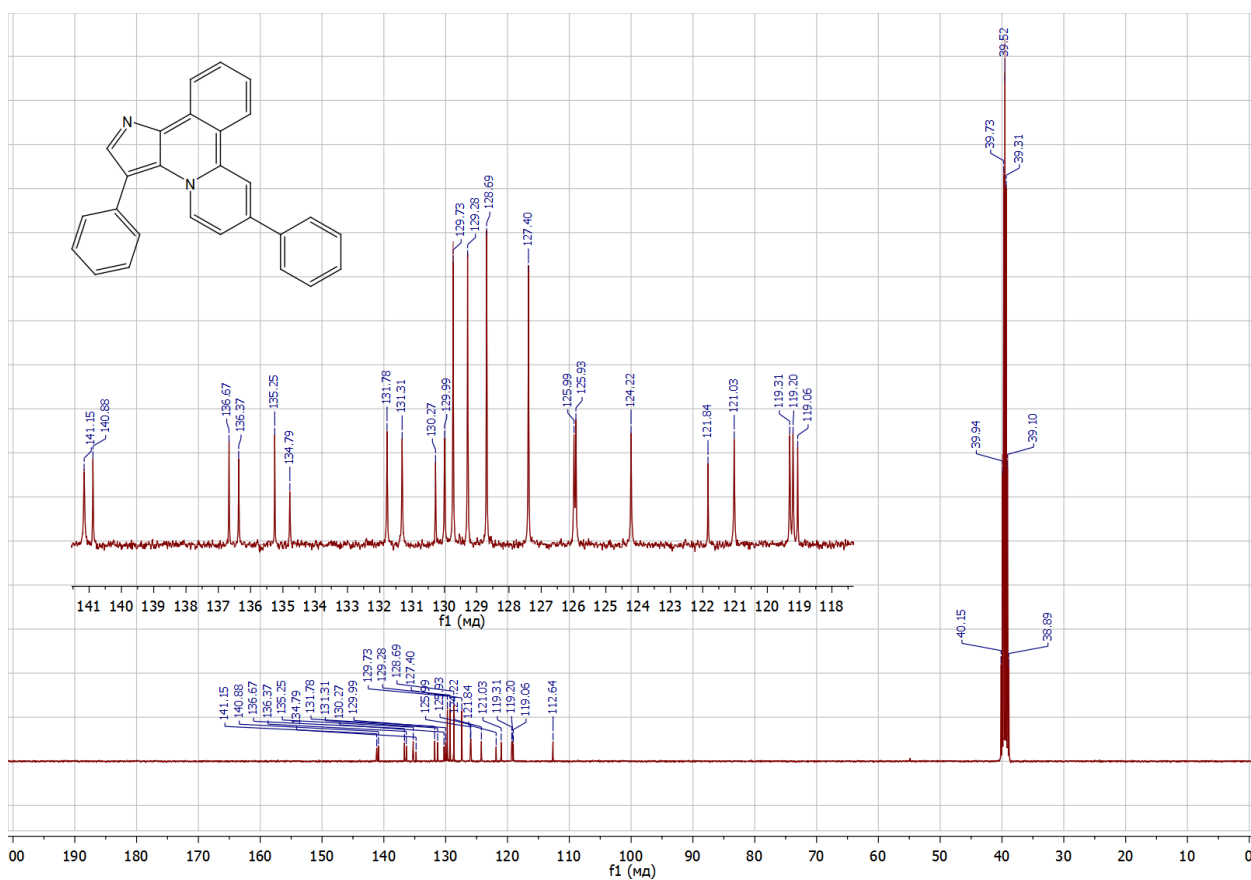

$^{13}\text{C}$  DEPT135 NMR (101 MHz,  $\text{DMSO}-d_6$ ) of 3,7-diphenylpyrido[2,1-*a*]pyrrolo[3,2-*c*]isoquinoline (**18d**)

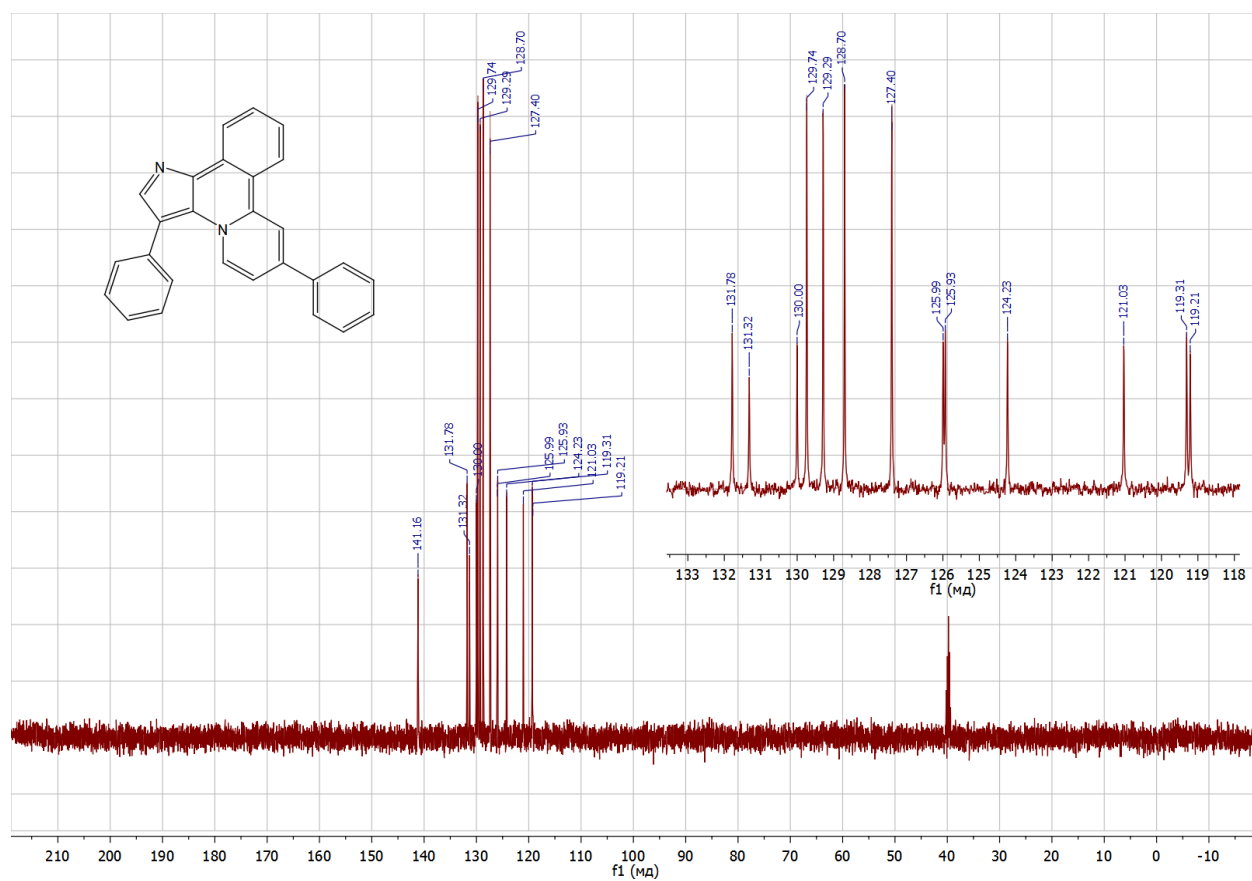

$^1\text{H}$  NMR (400 MHz,  $\text{DMSO}-d_6$ ) of 7-(4-methoxyphenyl)-3-phenylpyrido[2,1-*a*]pyrrolo[3,2-*c*]isoquinoline (**18e**)

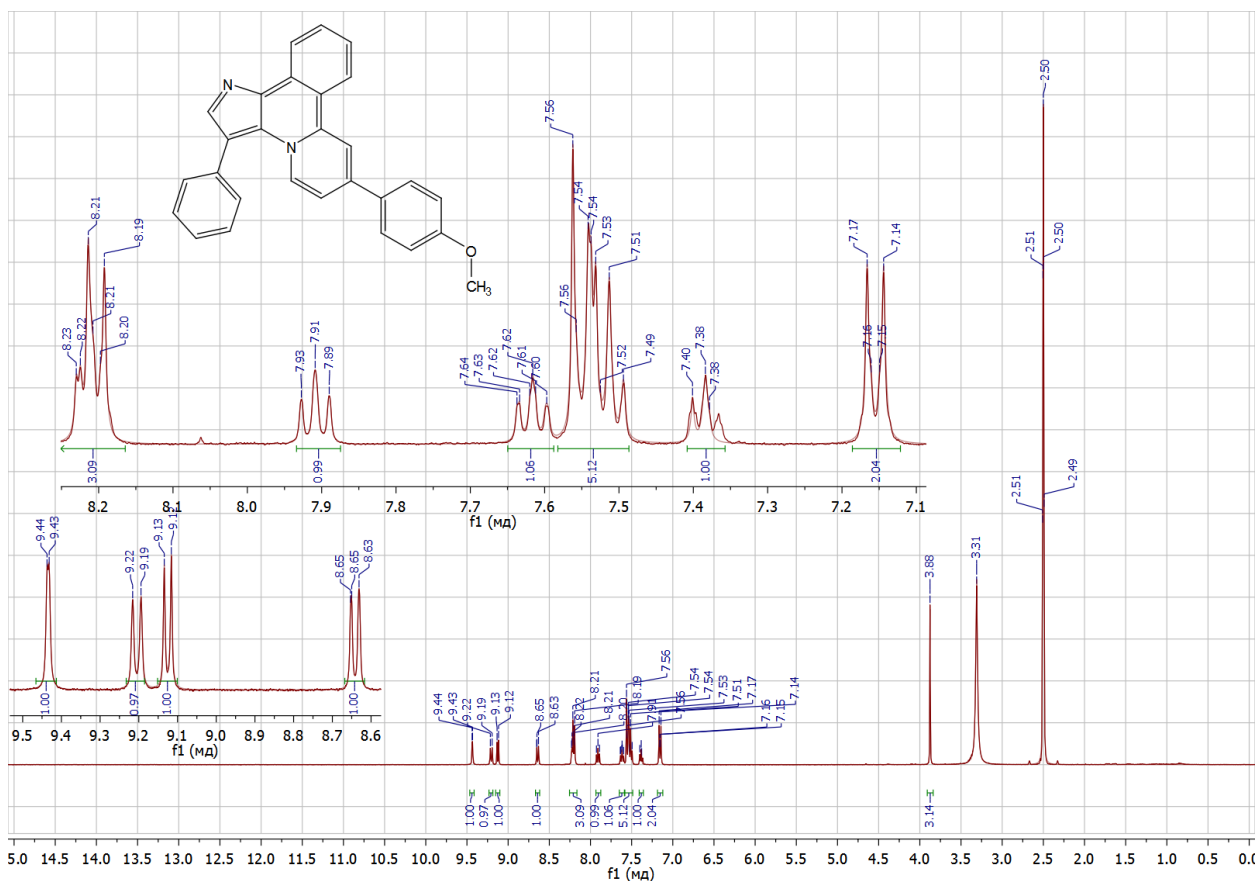

$^{13}\text{C}\{^1\text{H}\}$  NMR (101 MHz,  $\text{DMSO}-d_6$ ) of 7-(4-methoxyphenyl)-3-phenylpyrido[2,1-*a*]pyrrolo[3,2-*c*]isoquinoline (**18e**)

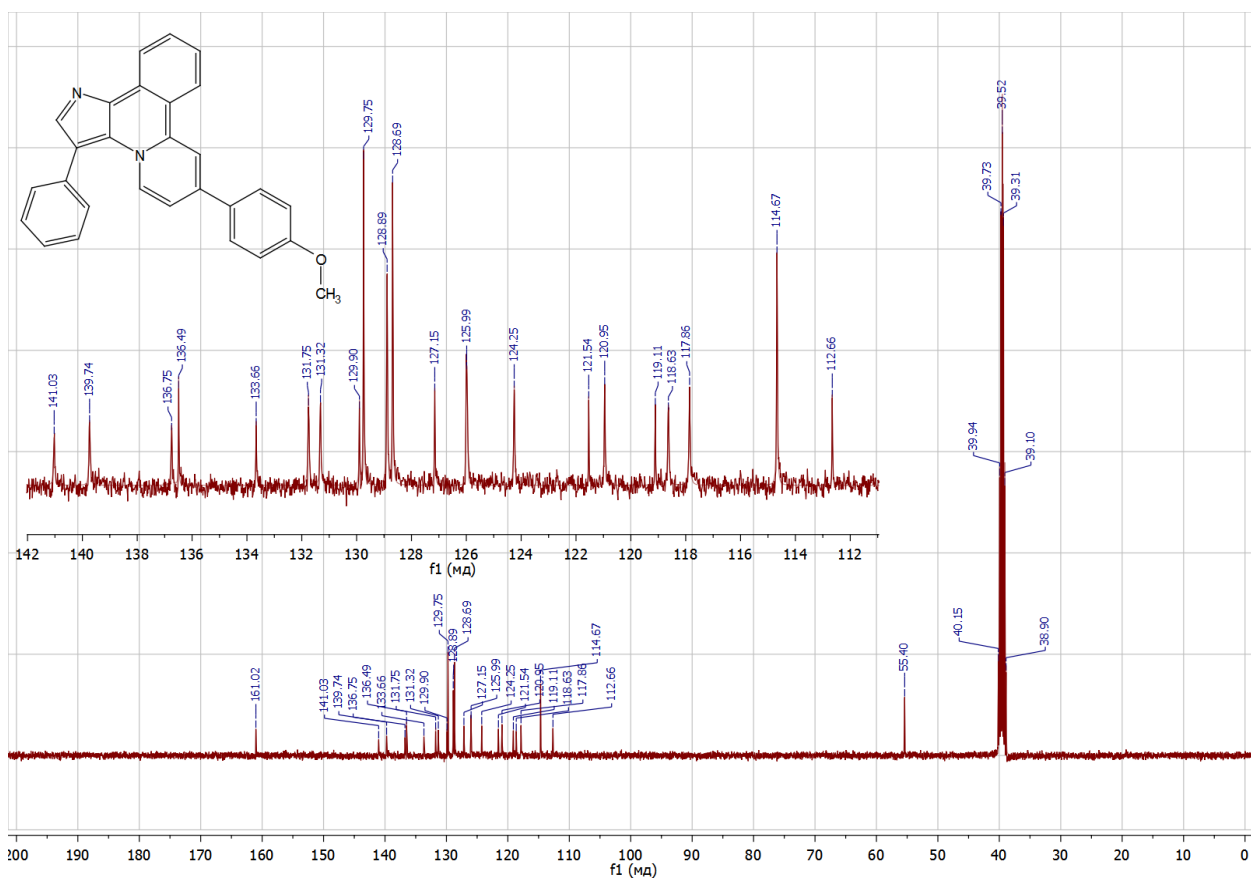

$^{13}\text{C}$  DEPT135 NMR (101 MHz,  $\text{DMSO}-d_6$ ) of 7-(4-methoxyphenyl)-3-phenylpyrido[2,1-*a*]pyrrolo[3,2-*c*]isoquinoline (**18e**)

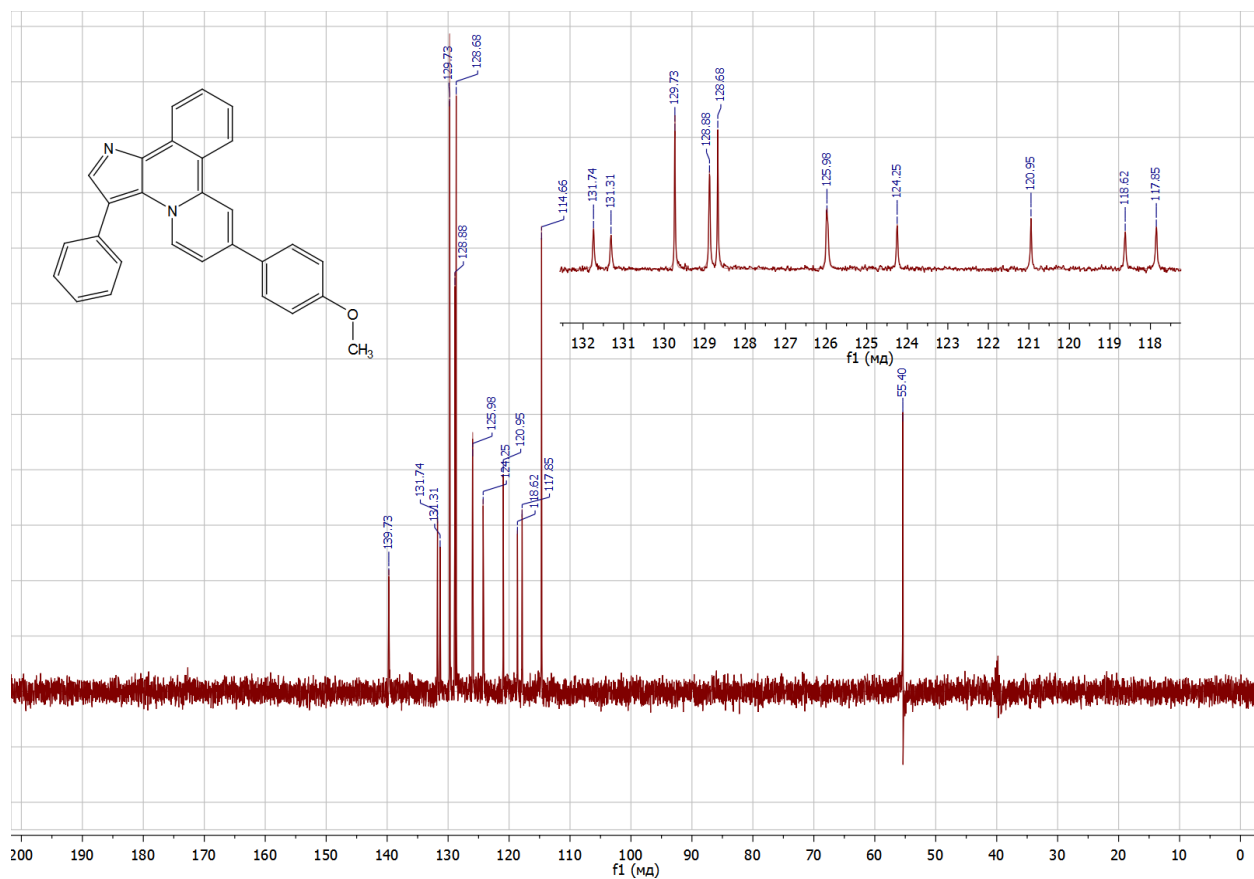

$^1\text{H}$  NMR (400 MHz,  $\text{DMSO}-d_6$ ) of 6,8-dimethyl-3-phenylpyrido[2,1-*a*]pyrrolo[3,2-*c*]isoquinoline (**18f**)

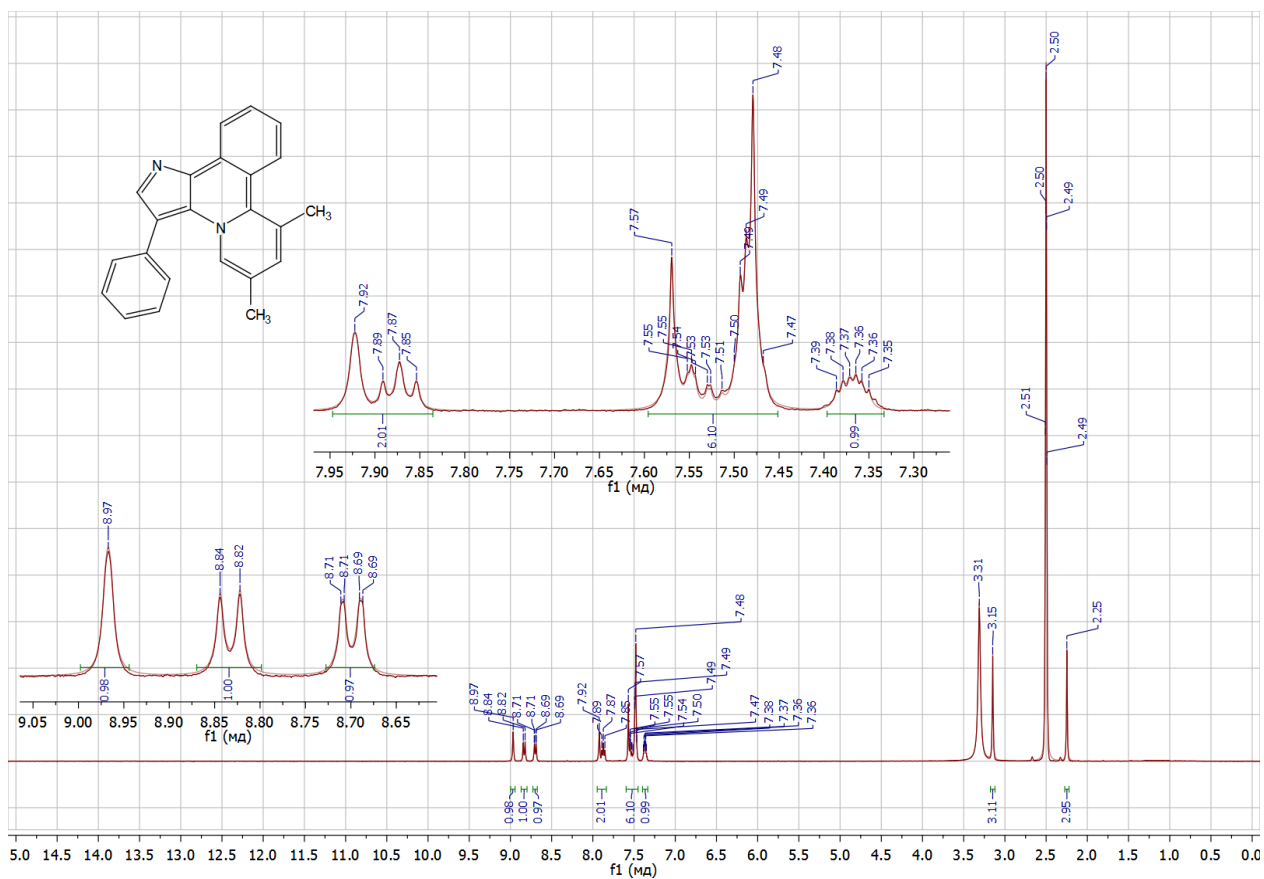

$^{13}\text{C}\{^1\text{H}\}$  NMR (101 MHz,  $\text{DMSO}-d_6$ ) of 6,8-dimethyl-3-phenylpyrido[2,1-*a*]pyrrolo[3,2-*c*]isoquinoline (**18f**)

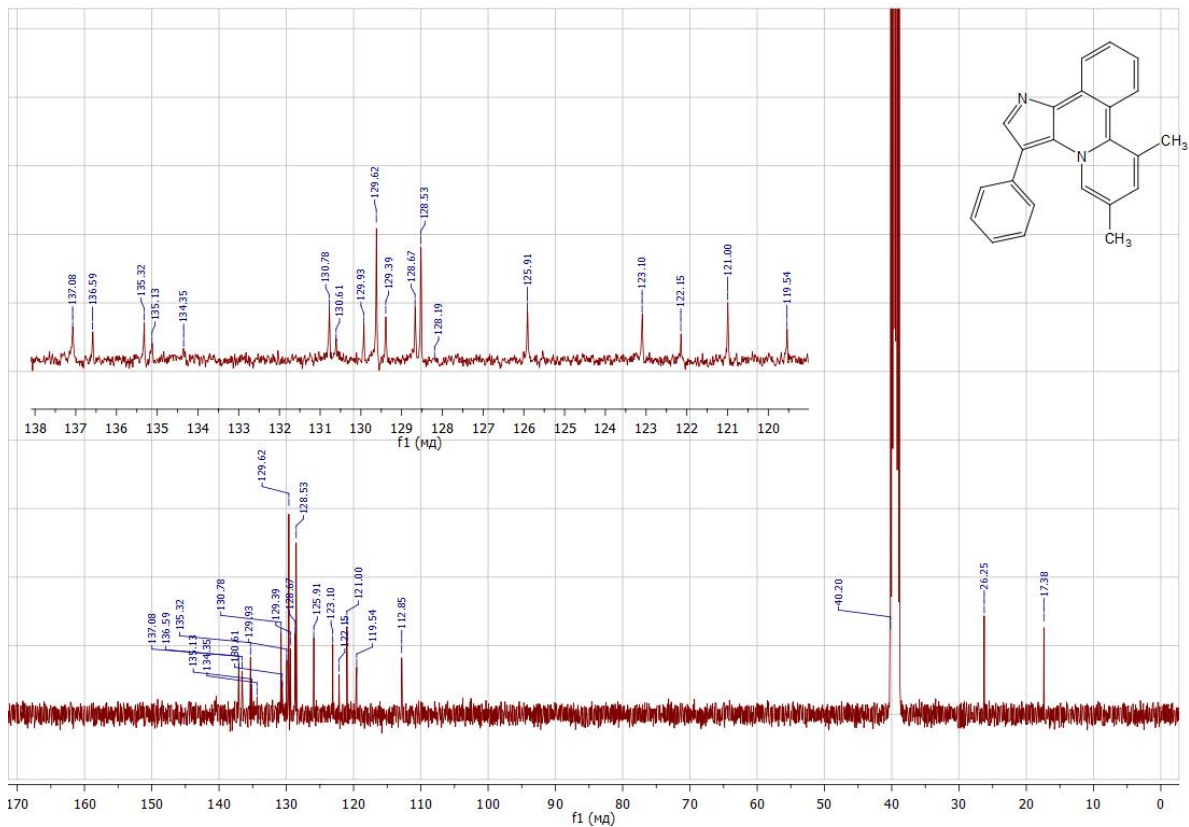

$^{13}\text{C}$  DEPT135 NMR (101 MHz,  $\text{DMSO}-d_6$ ) of 6,8-dimethyl-3-phenylpyrido[2,1-*a*]pyrrolo[3,2-*c*]isoquinoline (**18f**)

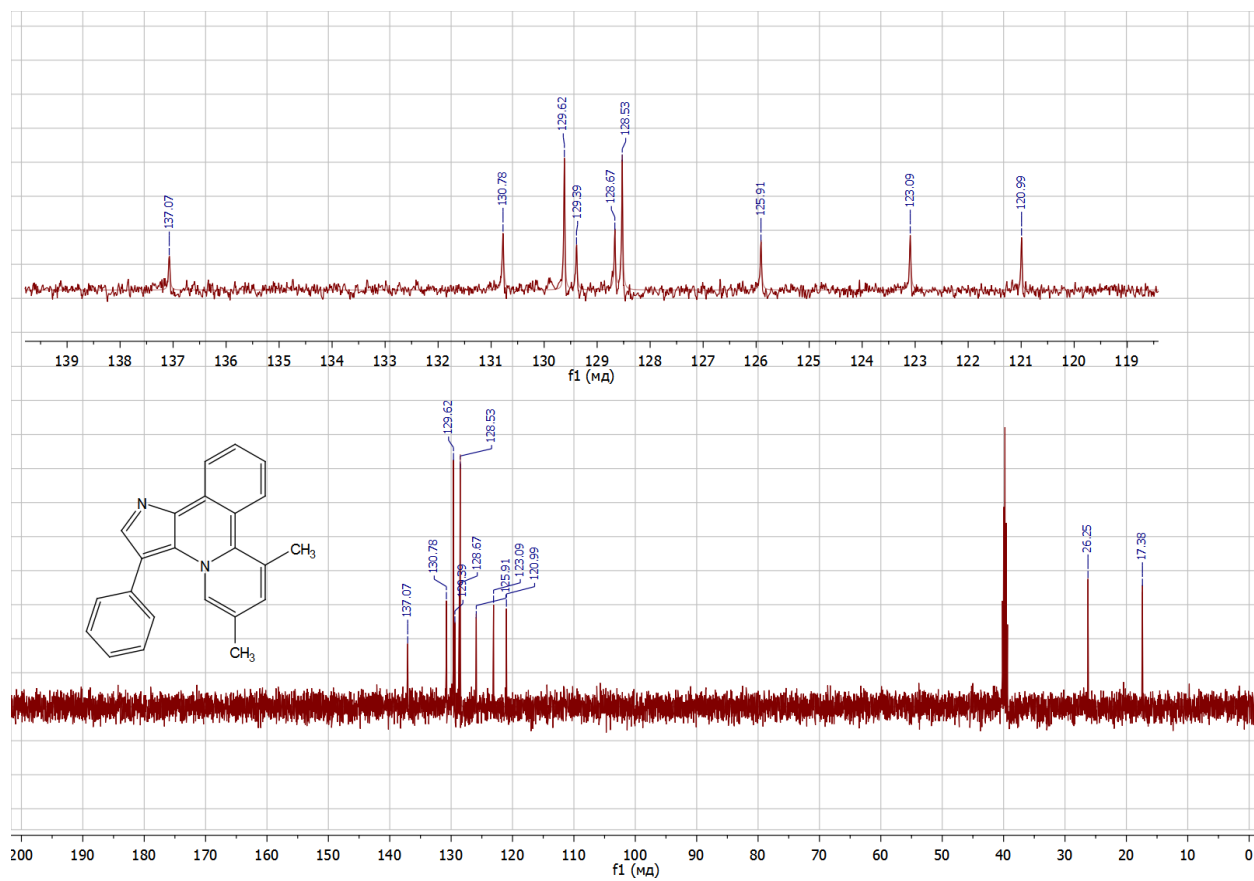

$^1\text{H}$  NMR (400 MHz,  $\text{DMSO}-d_6$ ) of 3-phenylisoquinolino[1,2-*a*]pyrrolo[3,2-*c*]isoquinoline (**18g**)

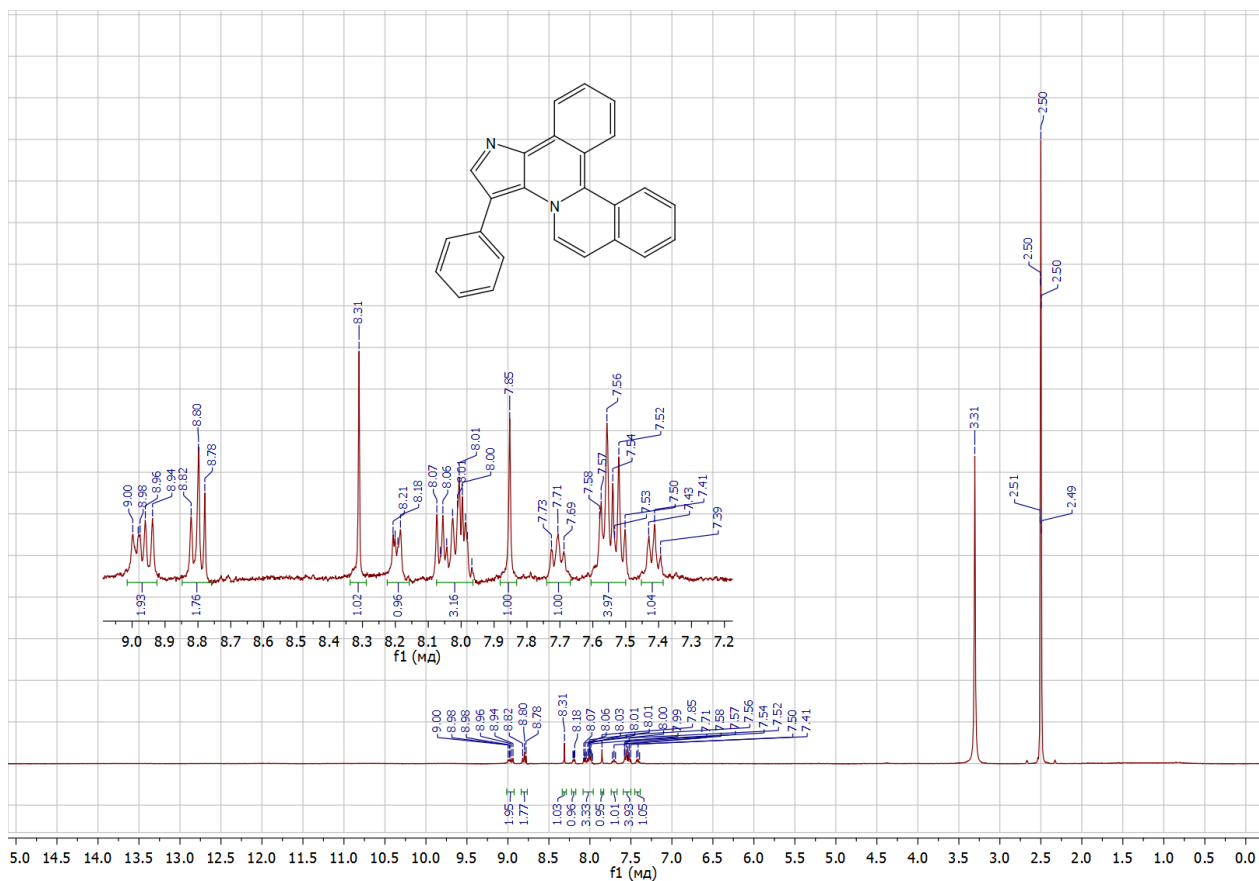

$^{13}\text{C}\{^1\text{H}\}$  NMR (101 MHz,  $\text{DMSO}-d_6$ ) of 3-phenylisoquinolino[1,2-*a*]pyrrolo[3,2-*c*]isoquinoline (**18g**)

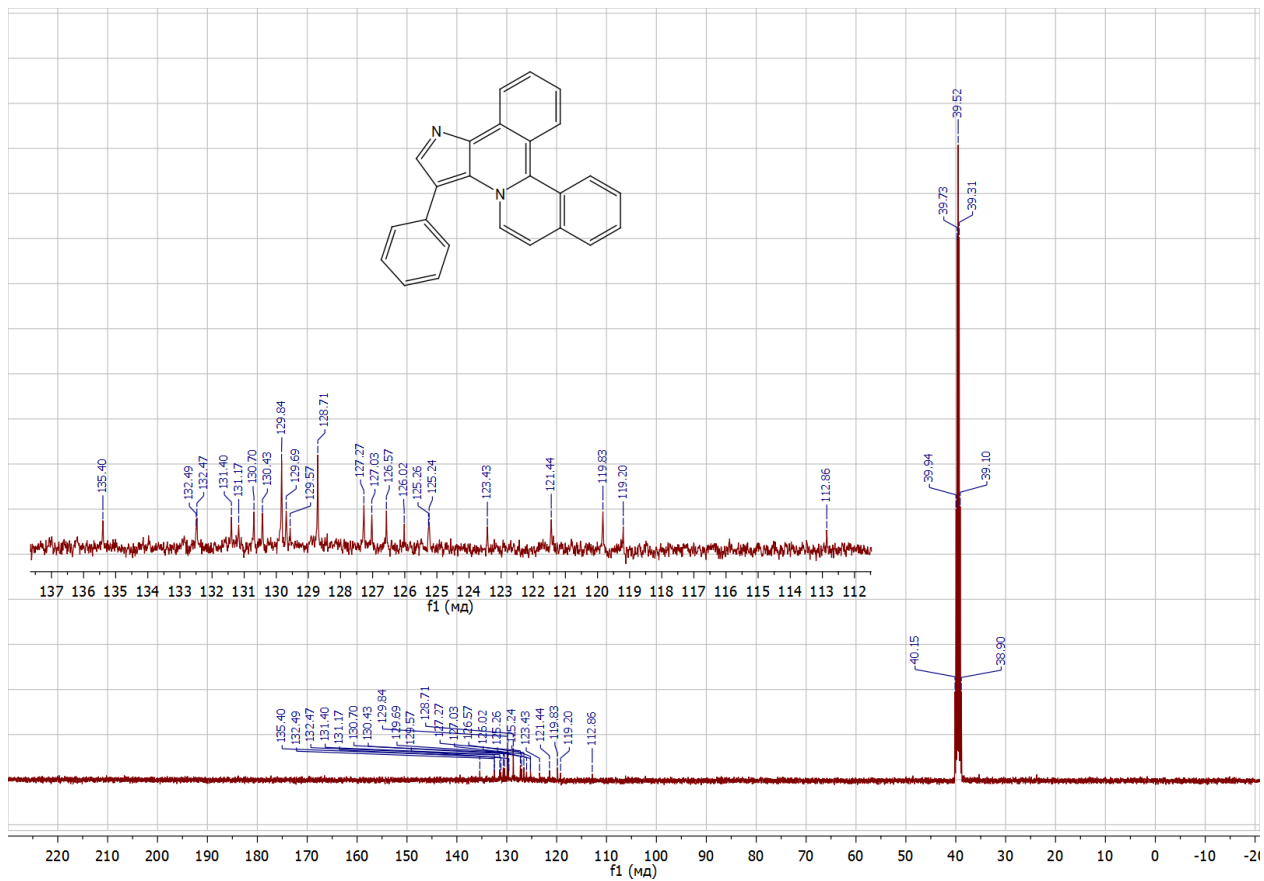

$^{13}\text{C}$  DEPT135 NMR (101 MHz,  $\text{DMSO}-d_6$ ) of 3-phenylisoquinolino[1,2-*a*]pyrrolo[3,2-*c*]isoquinoline (**18g**)

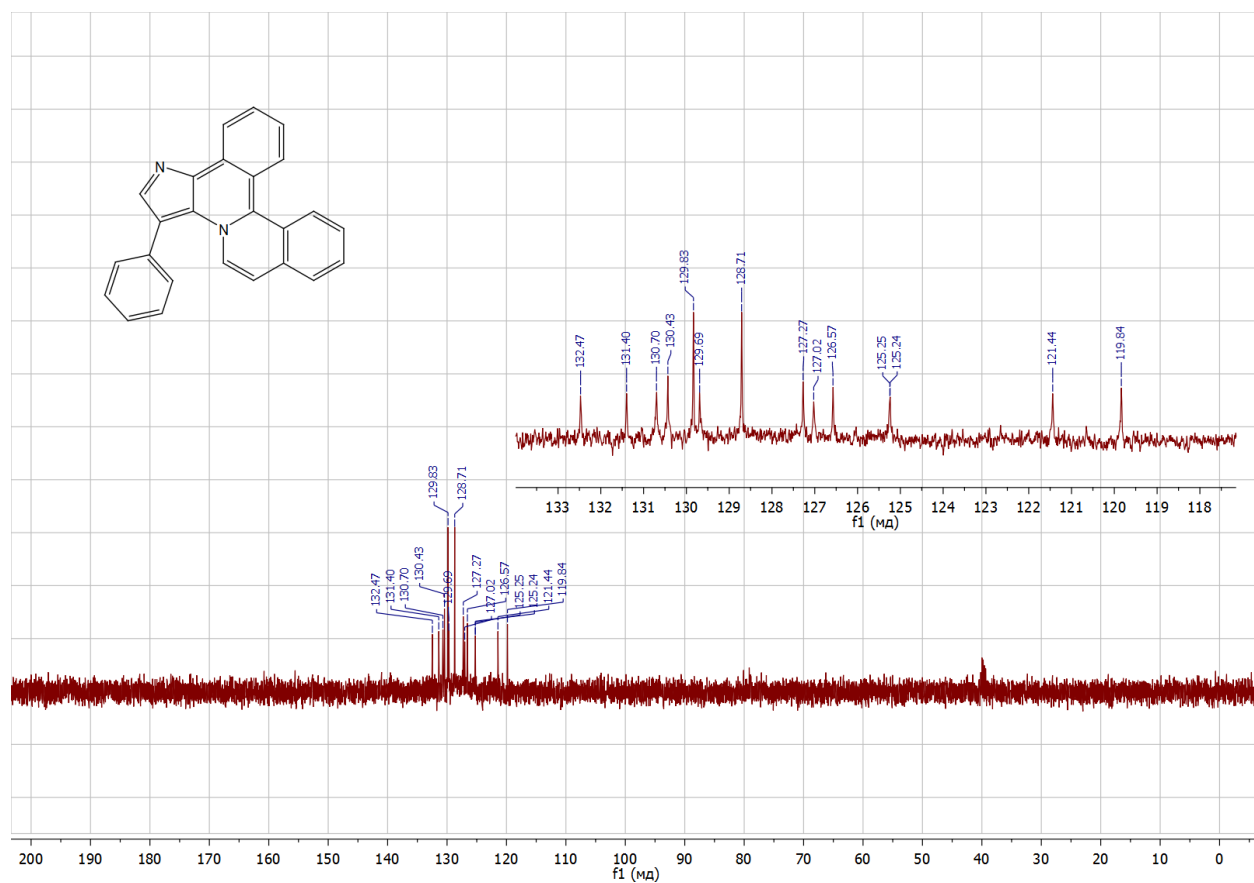



$^1\text{H}$  NMR (400 MHz,  $\text{DMSO}-d_6$ ) of 3-(4-methoxyphenyl)pyrido[2,1-*a*]pyrrolo[3,2-*c*]isoquinoline (**18h**)

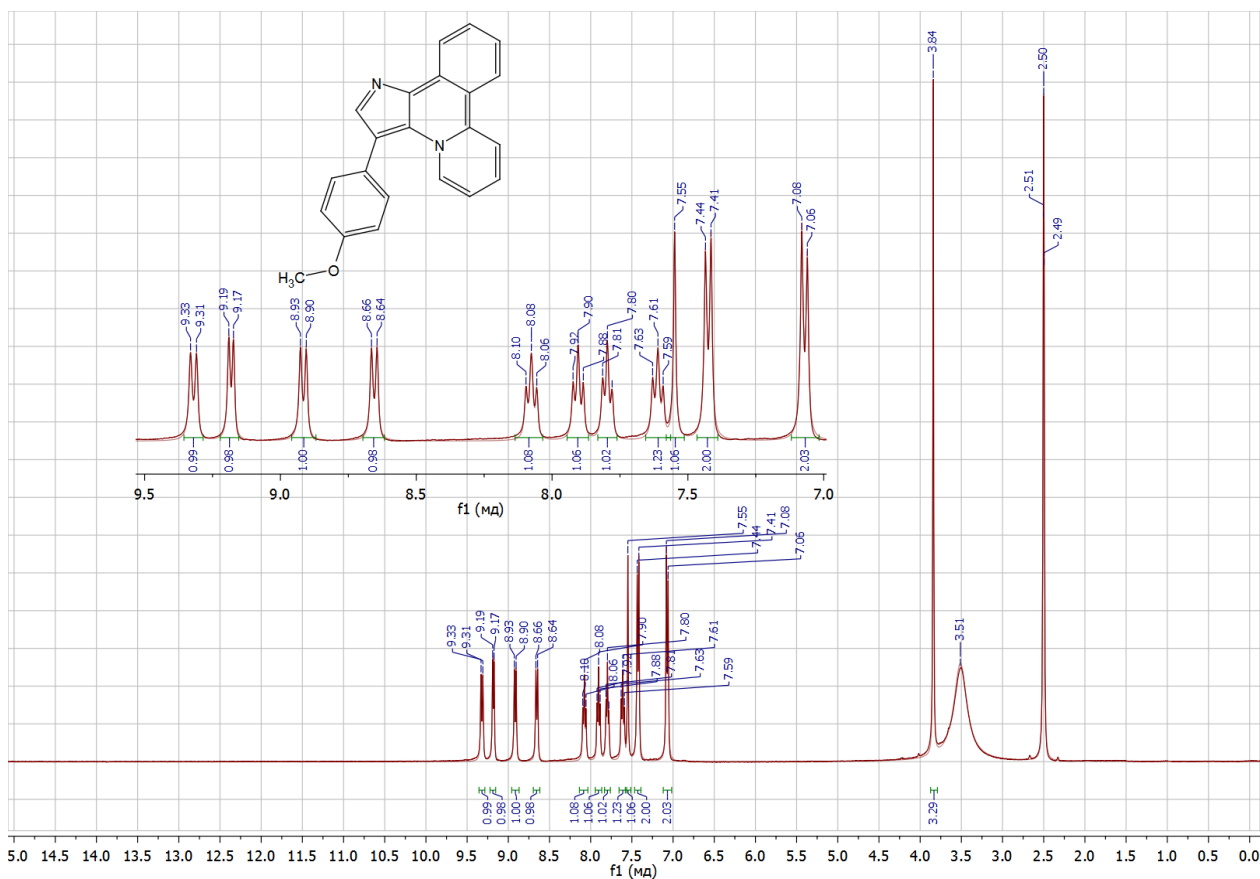

$^{13}\text{C}\{^1\text{H}\}$  NMR (101 MHz,  $\text{DMSO}-d_6$ ) of 3-(4-methoxyphenyl)pyrido[2,1-*a*]pyrrolo[3,2-*c*]isoquinoline (**18h**)

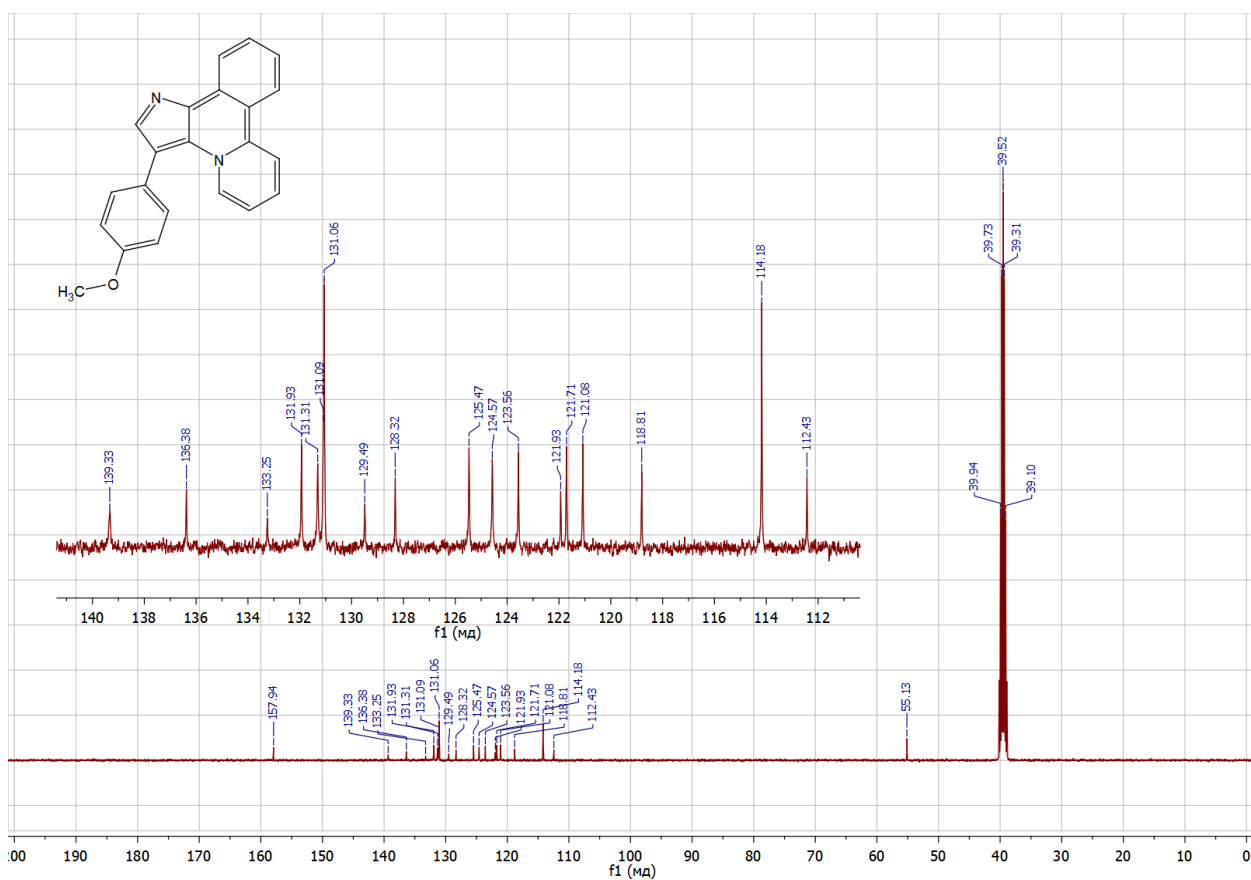

$^{13}\text{C}$  DEPT135 NMR (101 MHz,  $\text{DMSO}-d_6$ ) of 3-(4-methoxyphenyl)pyrido[2,1-*a*]pyrrolo[3,2-*c*]isoquinoline (**18h**)

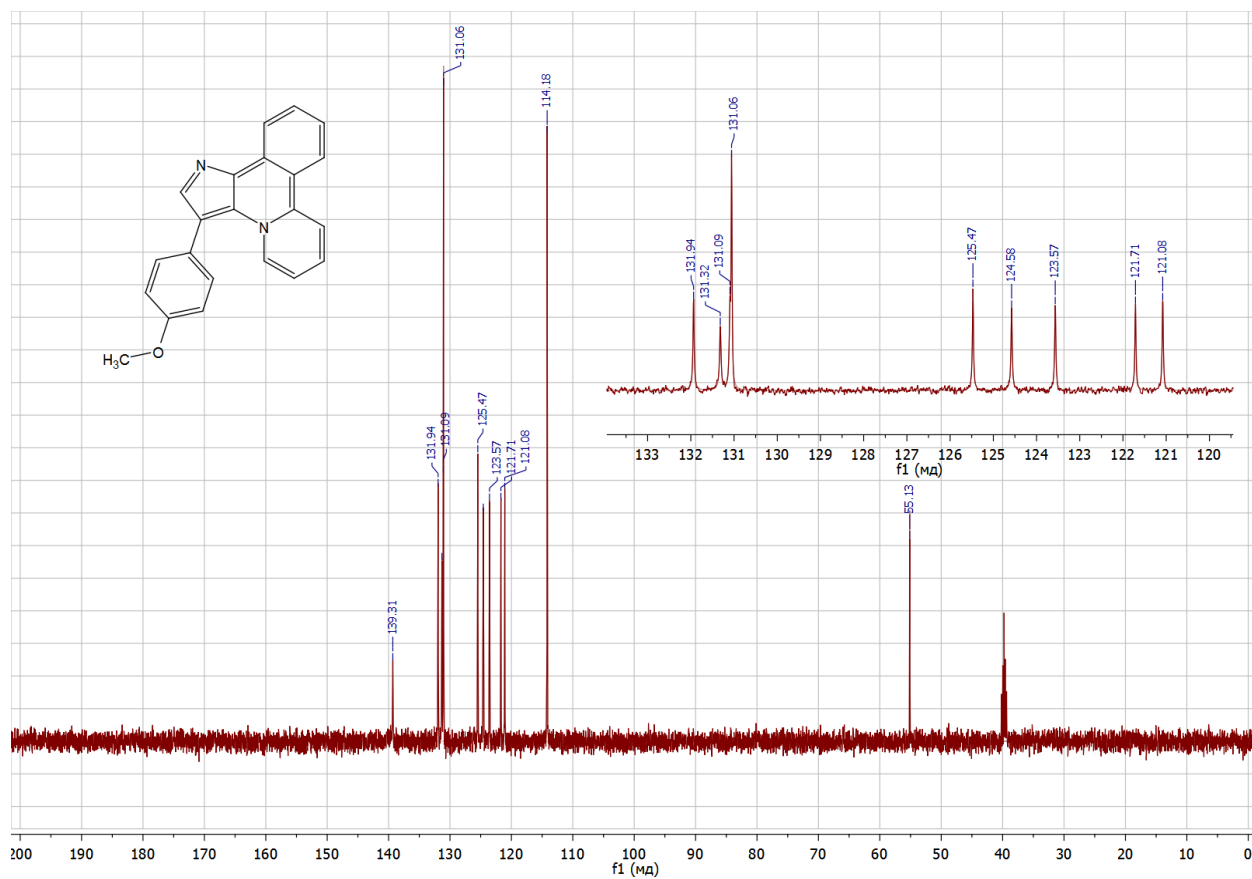

$^1\text{H}$  NMR (400 MHz,  $\text{DMSO-}d_6$ ) of 1-methyl-2-phenyl-1*H*-pyrido[2,1-*a*]pyrrolo[3,2-*c*]isoquinolin-4-ium iodide (**N-Me-19**)

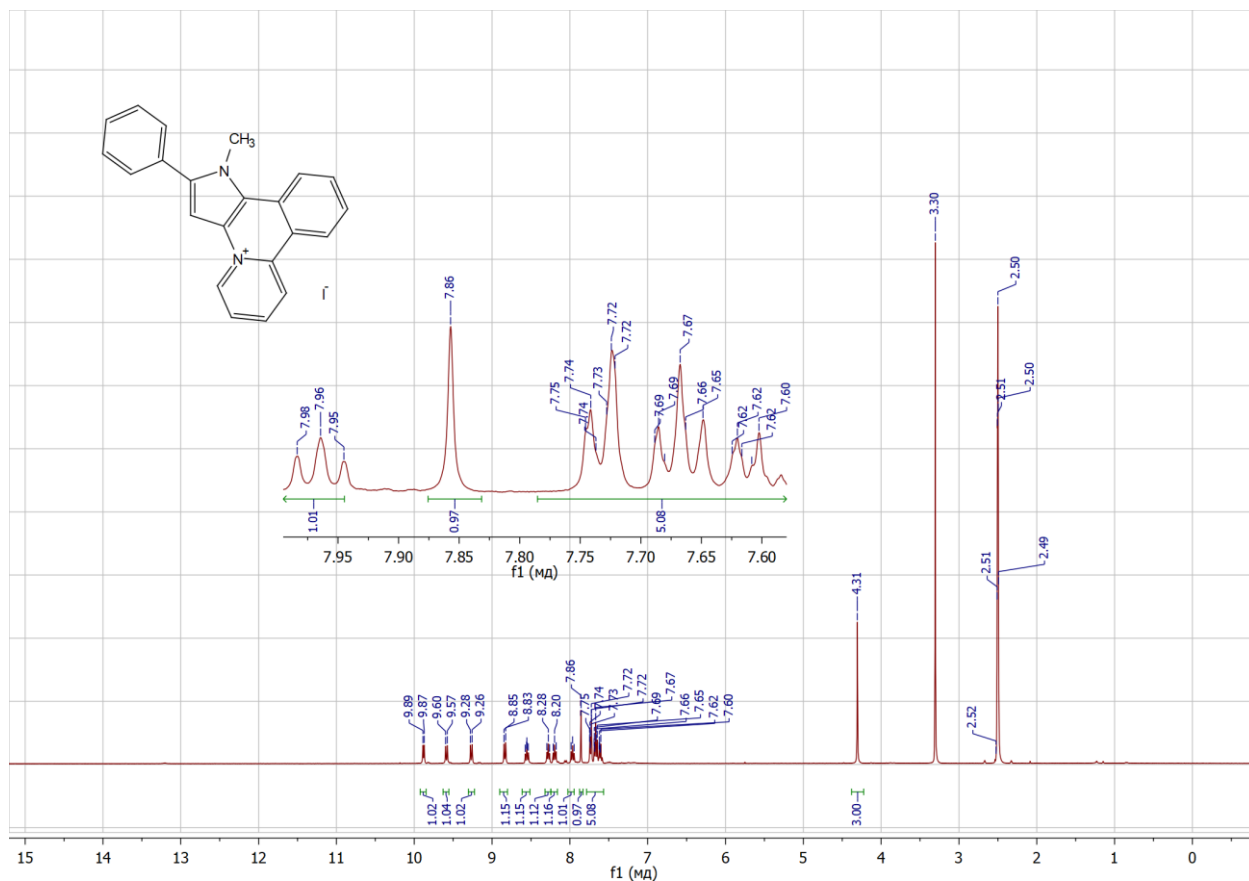

$^{13}\text{C}\{^1\text{H}\}$  NMR (101 MHz,  $\text{DMSO-}d_6$ ) of 1-methyl-2-phenyl-1*H*-pyrido[2,1-*a*]pyrrolo[3,2-*c*]isoquinolin-4-ium iodide (**N-Me-19**)

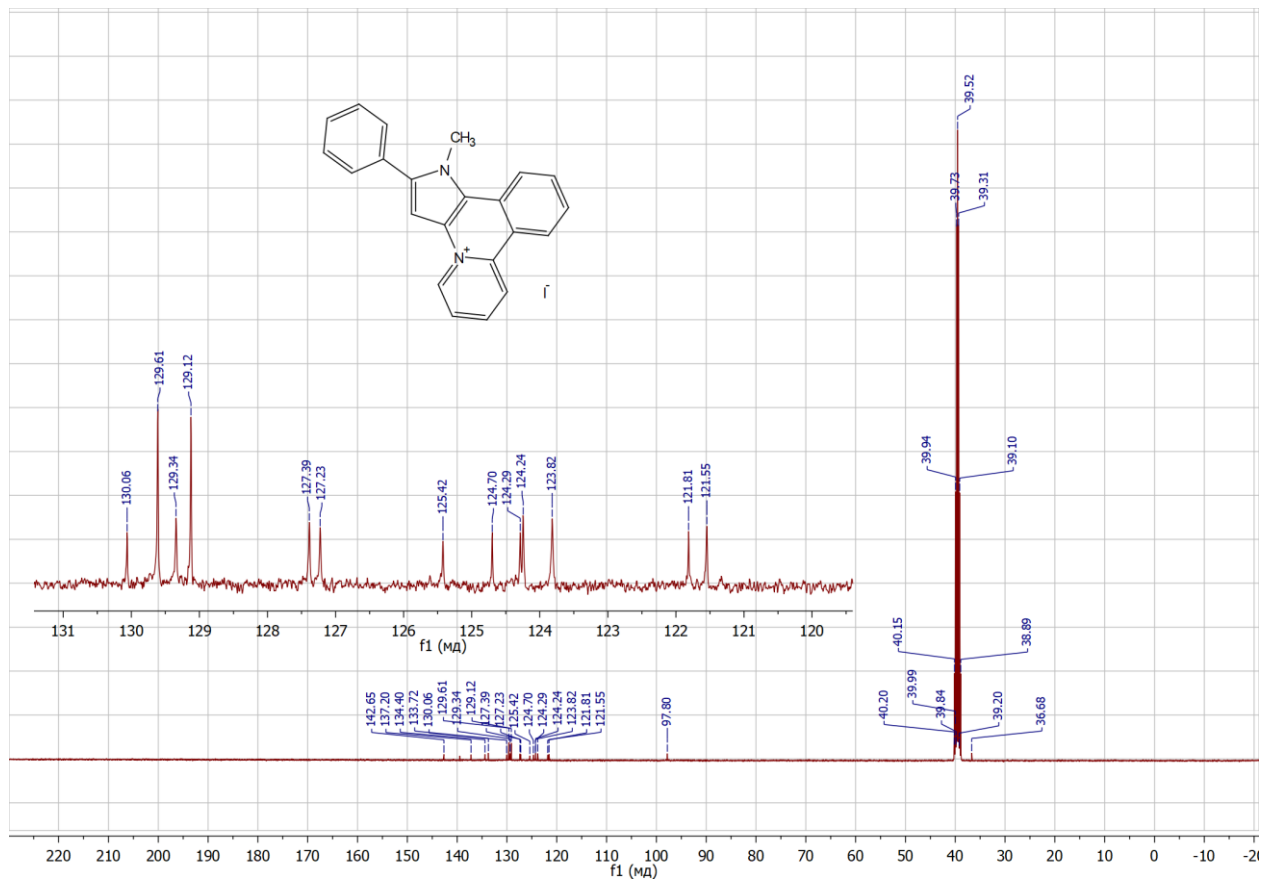

$^{13}\text{C}$  DEPT135 NMR (101 MHz,  $\text{DMSO-}d_6$ ) of 1-methyl-2-phenyl-1*H*-pyrido[2,1-*a*]pyrrolo[3,2-*c*]isoquinolin-4-ium iodide (**N-Me-19**)

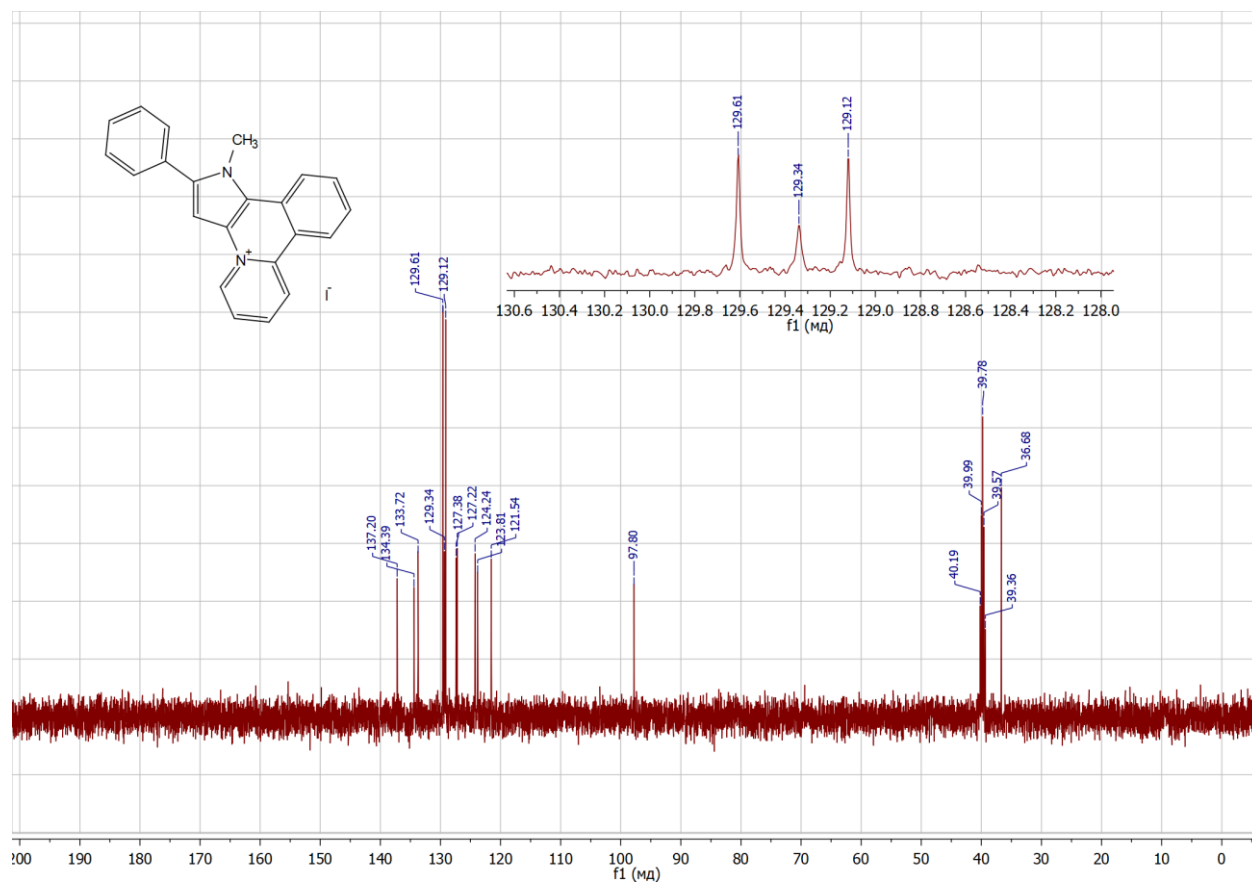

$^1\text{H}$  NMR (400 MHz,  $\text{CDCl}_3$ ) of 1-(1,2-dibromoethyl)-2-iodobenzene

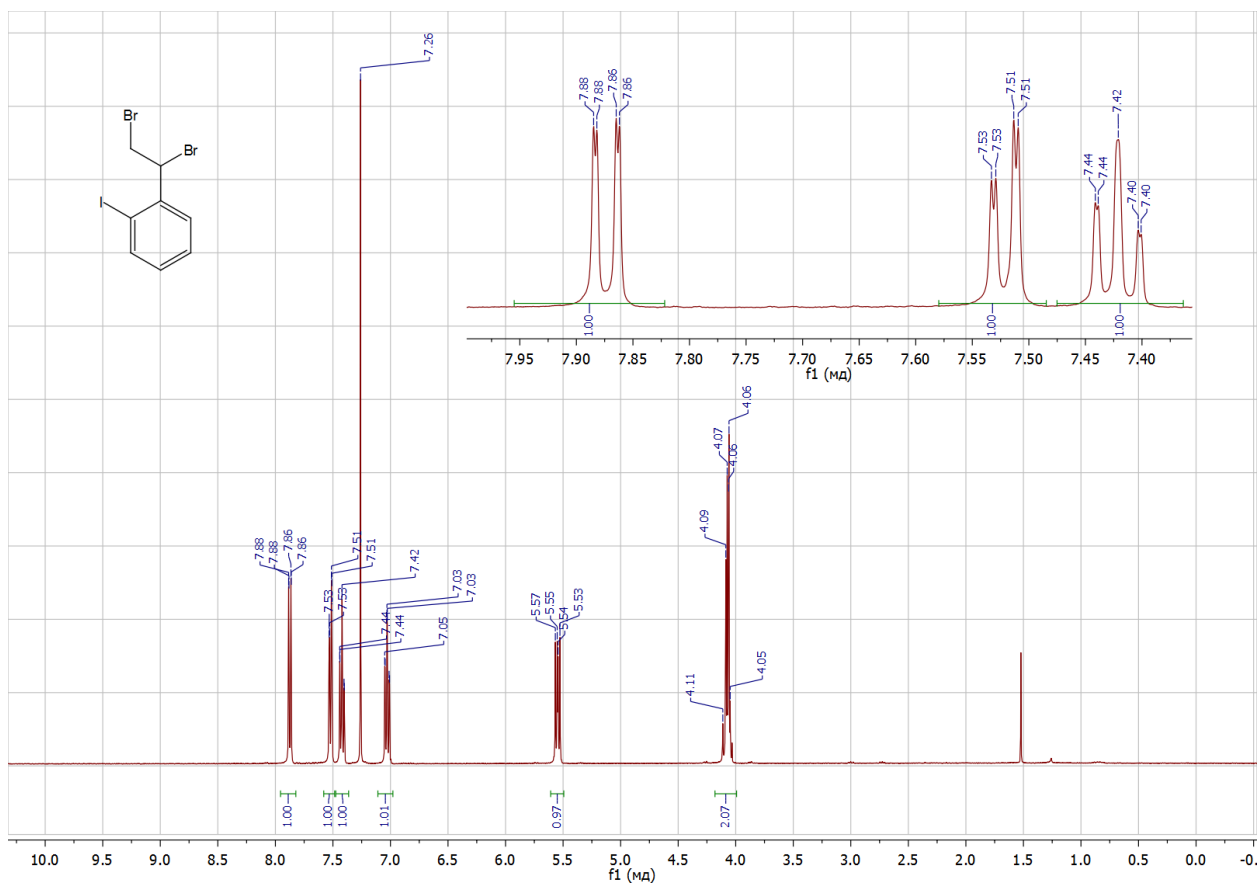

$^{13}\text{C}\{^1\text{H}\}$  NMR (101 MHz,  $\text{CDCl}_3$ ) of 1-(1,2-dibromoethyl)-2-iodobenzene

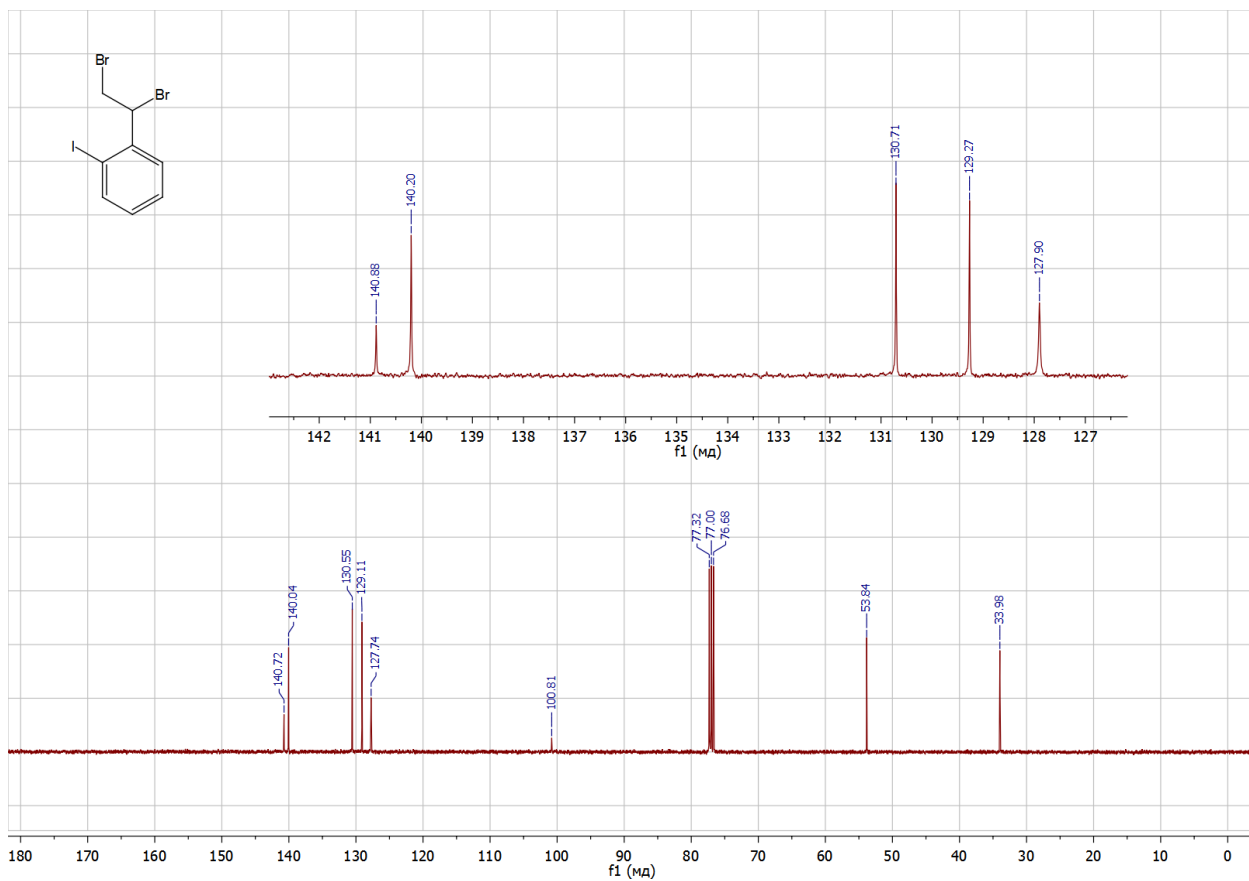

$^{13}\text{C}$  DEPT135 NMR (101 MHz,  $\text{CDCl}_3$ ) of 1-(1,2-dibromoethyl)-2-iodobenzene

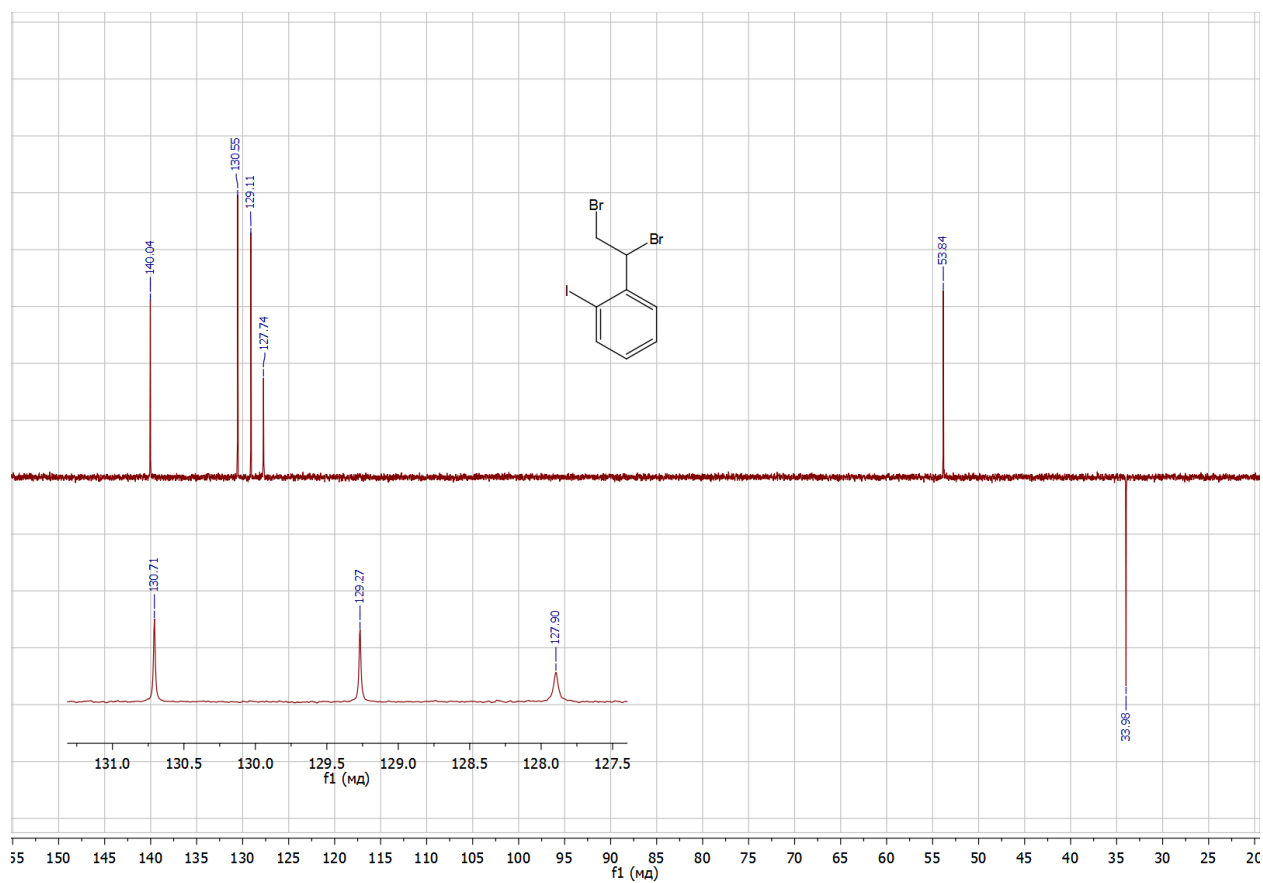

$^1\text{H}$  NMR (400 MHz,  $\text{CDCl}_3$ ) of 3-(2-iodophenyl)-2*H*-azirine

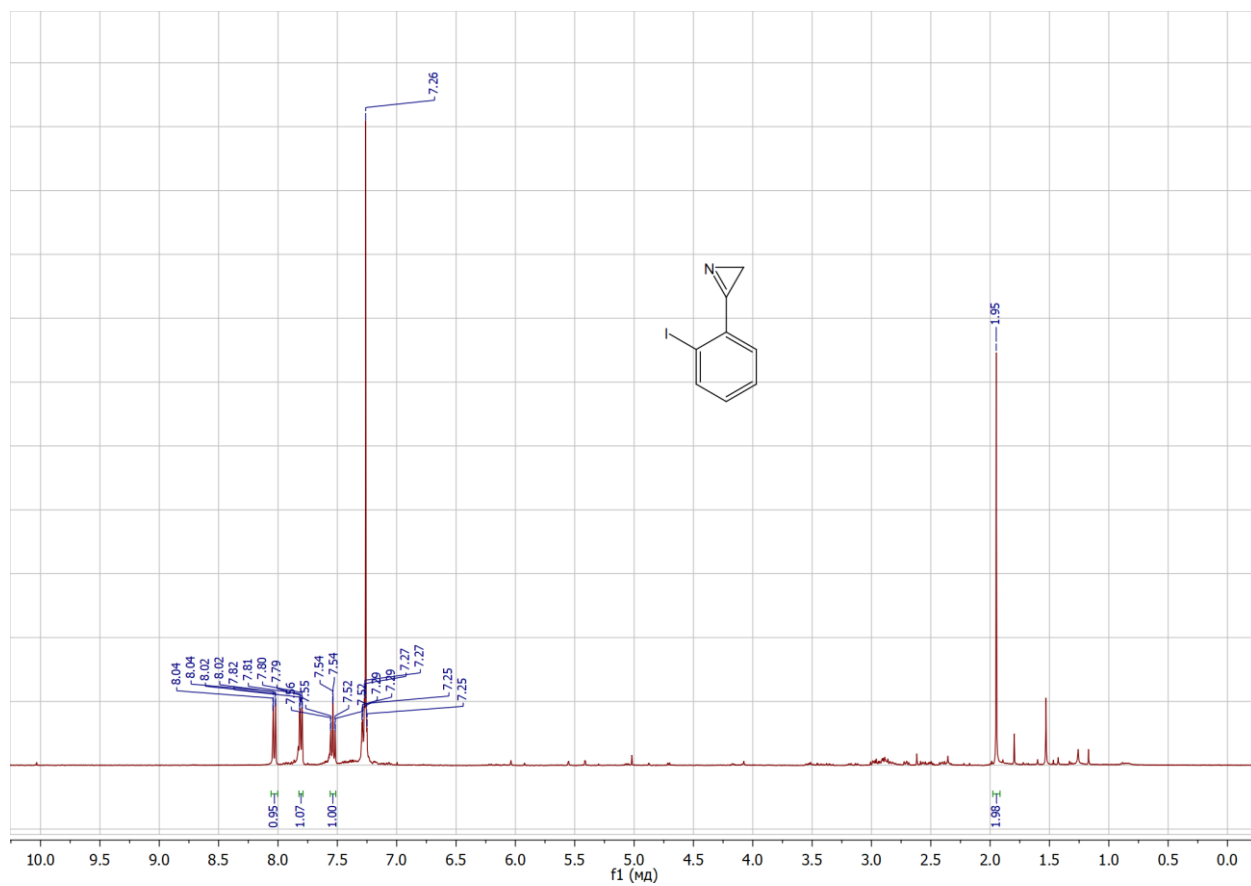

$^{13}\text{C}\{^1\text{H}\}$  NMR (101 MHz,  $\text{CDCl}_3$ ) of 3-(2-iodophenyl)-2*H*-azirine

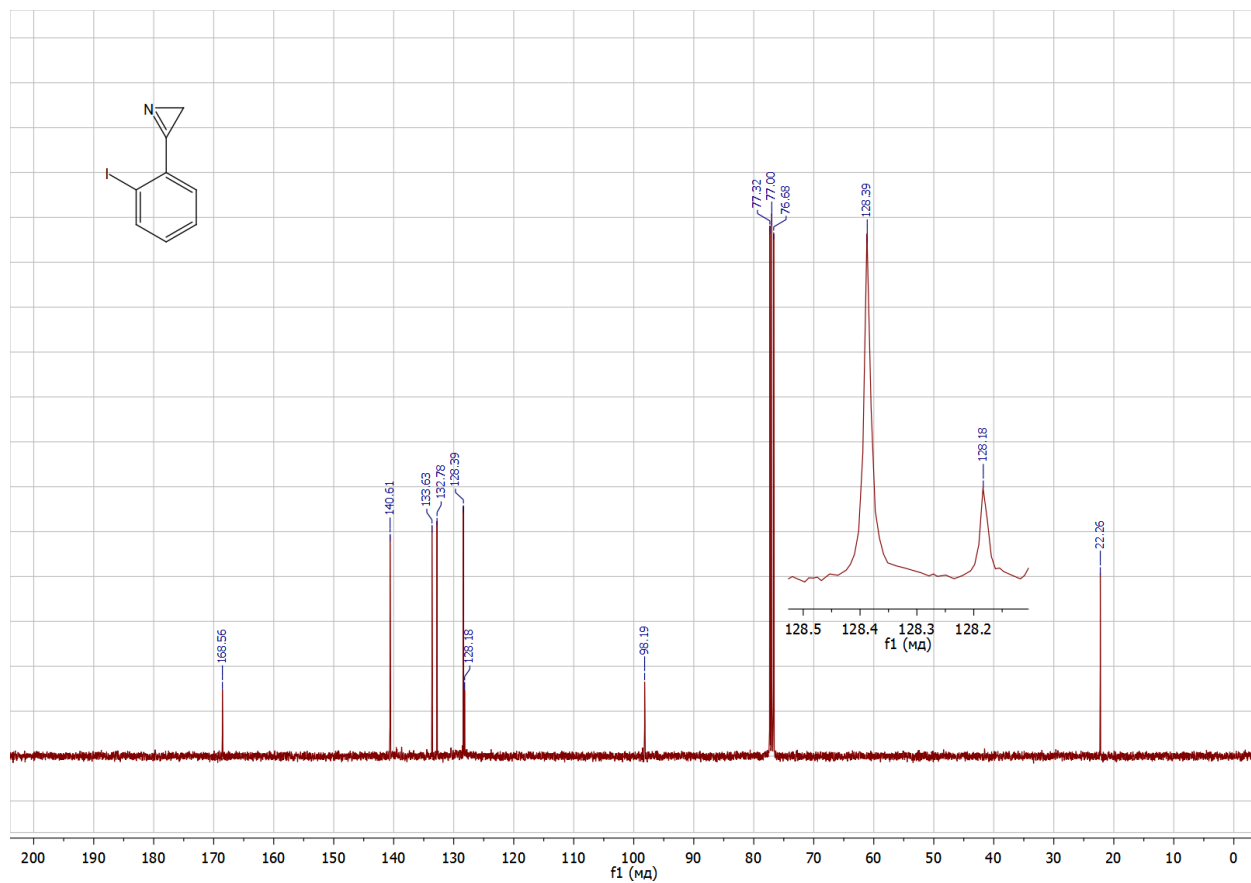

$^{13}\text{C}$  DEPT135 NMR (101 MHz,  $\text{CDCl}_3$ ) of 3-(2-iodophenyl)-2H-azirine

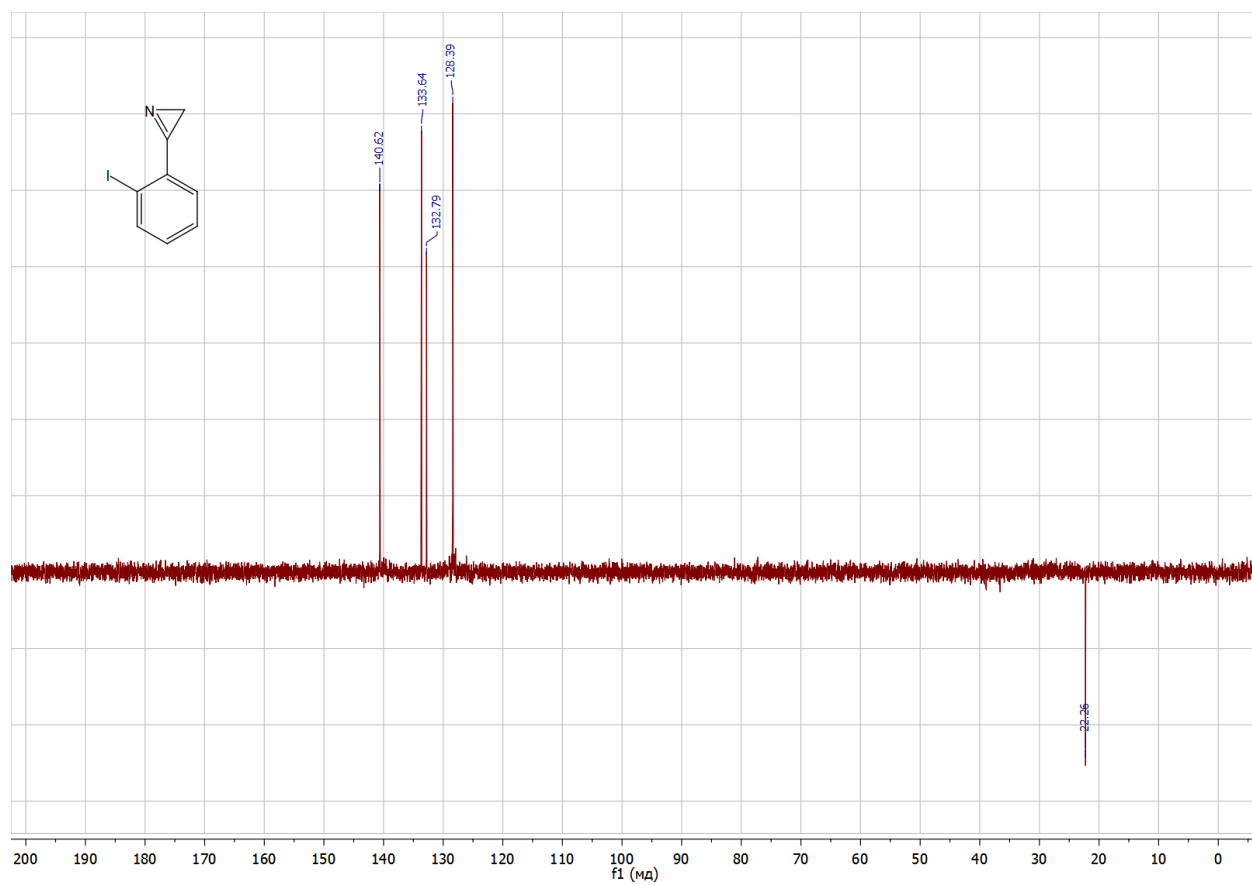



## X-ray diffraction experiments

A suitable crystal was selected and studied on a Rigaku Oxford Diffraction «XtaLAB Supernova» with HyPix 3000 type detector. The crystal was kept at 100(2) K during data collection. The structure was solved using Olex2 [1] with SHELXT [2] structure solution program using Intrinsic Phasing. Structural refinement was carried out with SHELXL refinement package [2] using Least Squares minimisation.

[1] Dolomanov, O. V.; Bourhis, L. J.; Gildea, R. J.; Howard, J. A. K.; Puschmann, H., OLEX2: a complete structure solution, refinement and analysis program. *Journal of Applied Crystallography* **2009**, 42, 339-341.

[2] Sheldrick, G., SHELXT - Integrated space-group and crystal-structure determination. *Acta Crystallographica Section A* **2015**, 71, 3-8.

3-Phenylpyrido[2,1-*a*]pyrrolo[3,4-*c*]isoquinolin-2-ium bromide (**3a**).

Single crystals of **3a** were growth from methanol/diethyl ether at room temperature.

(CCDC 1974298).

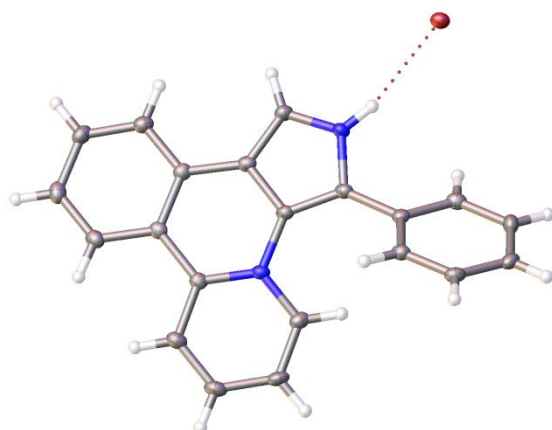

**Crystal Data** for  $C_{21}H_{15}BrN_2$  ( $M = 375.26$  g/mol): monoclinic, space group  $P2_1/n$  (no. 14),  $a = 9.3373(3)$  Å,  $b = 9.3695(3)$  Å,  $c = 17.9629(5)$  Å,  $\beta = 97.580(3)^\circ$ ,  $V = 1557.77(8)$  Å<sup>3</sup>,  $Z = 4$ ,  $T = 100(2)$  K,  $\mu(\text{CuK}\alpha) = 3.606$  mm<sup>-1</sup>,  $D_{\text{calc}} = 1.600$  g/cm<sup>3</sup>, 27246 reflections measured ( $9.936^\circ \leq 2\theta \leq 152.942^\circ$ ), 3252 unique ( $R_{\text{int}} = 0.0785$ ,  $R_{\text{sigma}} = 0.0343$ ) which were used in all calculations. The final  $R_1$  was 0.0326 ( $I \geq 2\sigma(I)$ ) and  $wR_2$  was 0.0847 ( $I \geq 2\sigma(I)$ ).

**Table S1 Crystal data and structure refinement for 3a.**

|                    |                     |
|--------------------|---------------------|
| Identificationcode | 3a                  |
| Empiricalformula   | $C_{21}H_{15}BrN_2$ |
| Formulaweight      | 375.26              |
| Temperature/K      | 100(2)              |
| Crystalsystem      | monoclinic          |
| Spacegroup         | $P2_1/n$            |
| $a/\text{\AA}$     | 9.3373(3)           |
| $b/\text{\AA}$     | 9.3695(3)           |

|                                                |                                                                |
|------------------------------------------------|----------------------------------------------------------------|
| c/Å                                            | 17.9629(5)                                                     |
| $\alpha/^\circ$                                | 90                                                             |
| $\beta/^\circ$                                 | 97.580(3)                                                      |
| $\gamma/^\circ$                                | 90                                                             |
| Volume/Å <sup>3</sup>                          | 1557.77(8)                                                     |
| Z                                              | 4                                                              |
| $D_{\text{calc}}/\text{cm}^3$                  | 1.600                                                          |
| $\mu/\text{mm}^{-1}$                           | 3.606                                                          |
| F(000)                                         | 760.0                                                          |
| Crystalsize/mm <sup>3</sup>                    | 0.21 × 0.15 × 0.1                                              |
| Radiation                                      | CuK $\alpha$ ( $\lambda$ = 1.54184)                            |
| 2 $\Theta$ range for data collection/ $^\circ$ | 9.936 to 152.942                                               |
| Indexranges                                    | -11 ≤ h ≤ 11, -11 ≤ k ≤ 11, -22 ≤ l ≤ 22                       |
| Reflectionscollected                           | 27246                                                          |
| Independentreflections                         | 3252 [ $R_{\text{int}}$ = 0.0785, $R_{\text{sigma}}$ = 0.0343] |
| Data/restraints/parameters                     | 3252/0/217                                                     |
| Goodness-of-fit on F <sup>2</sup>              | 1.063                                                          |
| Final R indexes [ $I \geq 2\sigma(I)$ ]        | $R_1$ = 0.0326, $wR_2$ = 0.0847                                |
| Final R indexes [all data]                     | $R_1$ = 0.0395, $wR_2$ = 0.0886                                |
| Largest diff. peak/hole / e Å <sup>-3</sup>    | 0.51/-0.73                                                     |

**Table S2 Fractional Atomic Coordinates ( $\times 10^4$ ) and Equivalent Isotropic Displacement Parameters ( $\text{\AA}^2 \times 10^3$ ) for 3a.  $U_{\text{eq}}$  is defined as 1/3 of of the trace of the orthogonalised  $U_{\text{ij}}$  tensor.**

| Atom | x          | y          | z           | U(eq)      |
|------|------------|------------|-------------|------------|
| Br1  | 3820.3 (2) | 6148.2 (3) | 7966.3 (2)  | 17.96 (10) |
| N2   | 6410 (2)   | 3028 (2)   | 4998.6 (11) | 14.5 (4)   |
| N1   | 4699 (2)   | 4463 (2)   | 6511.3 (11) | 15.2 (4)   |
| C14  | 4149 (2)   | 2988 (2)   | 5554.1 (13) | 14.9 (4)   |
| C15  | 3620 (3)   | 3649 (2)   | 6150.8 (13) | 15.9 (5)   |
| C13  | 3519 (2)   | 1969 (2)   | 5008.1 (13) | 15.4 (5)   |
| C8   | 4421 (3)   | 1415 (2)   | 4504.6 (13) | 15.1 (5)   |
| C5   | 8092 (3)   | 2148 (3)   | 3929.5 (14) | 20.7 (5)   |
| C2   | 5600 (2)   | 3457 (3)   | 5575.0 (13) | 14.4 (4)   |
| C3   | 7696 (3)   | 3689 (3)   | 4937.8 (14) | 18.2 (5)   |
| C7   | 5878 (3)   | 1980 (3)   | 4496.4 (13) | 15.3 (4)   |
| C4   | 8551 (3)   | 3262 (3)   | 4416.5 (14) | 20.3 (5)   |
| C16  | 7283 (2)   | 5029 (3)   | 6558.4 (13) | 14.7 (4)   |
| C10  | 2453 (3)   | -74 (3)    | 3948.4 (14) | 20.4 (5)   |
| C6   | 6765 (3)   | 1531 (3)   | 3968.3 (14) | 19.6 (5)   |
| C1   | 5952 (2)   | 4354 (3)   | 6189.3 (13) | 14.9 (4)   |
| C9   | 3862 (3)   | 371 (3)    | 3984.1 (13) | 18.0 (5)   |
| C20  | 9839 (3)   | 4915 (3)   | 7039.4 (13) | 18.5 (5)   |
| C18  | 8488 (3)   | 7053 (3)   | 7201.0 (13) | 19.0 (5)   |
| C17  | 7240 (3)   | 6412 (3)   | 6841.4 (13) | 17.6 (5)   |
| C11  | 1559 (3)   | 485 (3)    | 4444.9 (14) | 20.1 (5)   |

|     |          |          |             |          |
|-----|----------|----------|-------------|----------|
| C21 | 8596 (3) | 4275 (3) | 6677.1 (13) | 16.8 (5) |
| C19 | 9792 (3) | 6309 (3) | 7297.9 (14) | 19.3 (5) |
| C12 | 2086 (3) | 1487 (3) | 4972.4 (14) | 18.9 (5) |

**Table S3 Anisotropic Displacement Parameters ( $\text{\AA}^2 \times 10^3$ ) for 3a. The Anisotropic displacement factor exponent takes the form:  $-2\pi^2[h^2a^{*2}U_{11}+2hka^*b^*U_{12}+\dots]$ .**

| Atom | U <sub>11</sub> | U <sub>22</sub> | U <sub>33</sub> | U <sub>23</sub> | U <sub>13</sub> | U <sub>12</sub> |
|------|-----------------|-----------------|-----------------|-----------------|-----------------|-----------------|
| Br1  | 15.96 (14)      | 19.73 (15)      | 19.01 (15)      | -1.14 (9)       | 5.35 (9)        | 1.28 (8)        |
| N2   | 13.7 (9)        | 16.0 (10)       | 14.5 (9)        | 1.3 (7)         | 4.7 (7)         | 1.3 (7)         |
| N1   | 13.8 (9)        | 18.0 (10)       | 14.6 (9)        | -2.4 (8)        | 4.3 (7)         | 0.8 (7)         |
| C14  | 13.7 (10)       | 15.0 (11)       | 16.5 (11)       | 2.8 (9)         | 3.7 (8)         | 2.1 (8)         |
| C15  | 12.9 (10)       | 17.8 (12)       | 17.1 (11)       | 0.4 (9)         | 2.9 (9)         | 0.9 (8)         |
| C13  | 15.0 (11)       | 15.0 (11)       | 15.8 (11)       | 2.7 (9)         | 1.1 (9)         | 1.2 (8)         |
| C8   | 16.7 (11)       | 13.0 (11)       | 15.8 (11)       | 2.5 (9)         | 2.3 (9)         | 2.9 (8)         |
| C5   | 20.3 (12)       | 24.4 (13)       | 18.9 (11)       | 1.1 (10)        | 8.5 (9)         | 4.8 (10)        |
| C2   | 13.6 (10)       | 14.4 (11)       | 16.1 (11)       | 1.5 (9)         | 4.6 (8)         | 0.9 (8)         |
| C3   | 15.2 (11)       | 21.0 (12)       | 18.4 (11)       | 3.6 (9)         | 2.7 (9)         | -1.2 (9)        |
| C7   | 16.6 (11)       | 14.8 (11)       | 14.4 (10)       | 1.8 (8)         | 2.4 (8)         | 2.2 (8)         |
| C4   | 14.9 (11)       | 25.9 (13)       | 21.5 (12)       | 3.3 (10)        | 7.4 (9)         | -1.1 (9)        |
| C16  | 14.1 (11)       | 16.3 (11)       | 14.5 (10)       | 1.3 (9)         | 4.4 (8)         | -0.7 (8)        |
| C10  | 25.5 (13)       | 16.7 (12)       | 18.0 (12)       | 0.1 (9)         | -1.4 (10)       | -2.0 (9)        |
| C6   | 20.3 (12)       | 22.5 (12)       | 16.7 (11)       | -0.2 (9)        | 5.4 (9)         | 3.3 (9)         |
| C1   | 14.2 (10)       | 14.6 (11)       | 16.7 (11)       | 1.3 (9)         | 4.9 (9)         | 2.3 (8)         |
| C9   | 21.5 (12)       | 15.9 (12)       | 16.9 (11)       | 0.6 (9)         | 4.0 (9)         | 2.0 (9)         |
| C20  | 14.7 (11)       | 22.8 (12)       | 18.9 (11)       | 2.6 (10)        | 6.1 (9)         | 1.6 (9)         |
| C18  | 22.7 (12)       | 16.4 (11)       | 17.9 (11)       | -2.9 (9)        | 3.0 (9)         | -4.3 (9)        |
| C17  | 17.5 (11)       | 18.5 (12)       | 17.2 (11)       | 2.4 (9)         | 4.2 (9)         | 4.0 (9)         |
| C11  | 16.1 (11)       | 22.8 (13)       | 20.9 (12)       | 2.2 (10)        | 0.4 (9)         | -4.2 (9)        |
| C21  | 16.7 (11)       | 16.4 (11)       | 18.4 (11)       | 1.0 (9)         | 6.2 (9)         | 1.5 (9)         |
| C19  | 16.3 (11)       | 24.5 (13)       | 17.5 (11)       | 0.6 (9)         | 4.1 (9)         | -5.8 (9)        |
| C12  | 16.5 (11)       | 21.5 (12)       | 18.9 (12)       | 1.9 (10)        | 3.9 (9)         | -0.2 (9)        |

**Table S4 Bond Lengths for 3a.**

| Atom | Atom | Length/ $\text{\AA}$ | Atom | Atom | Length/ $\text{\AA}$ |
|------|------|----------------------|------|------|----------------------|
| N2   | C2   | 1.418 (3)            | C2   | C1   | 1.392 (3)            |
| N2   | C3   | 1.369 (3)            | C3   | C4   | 1.368 (3)            |
| N2   | C7   | 1.381 (3)            | C7   | C6   | 1.404 (3)            |
| N1   | C15  | 1.358 (3)            | C16  | C1   | 1.472 (3)            |
| N1   | C1   | 1.376 (3)            | C16  | C17  | 1.395 (3)            |
| C14  | C15  | 1.384 (3)            | C16  | C21  | 1.406 (3)            |
| C14  | C13  | 1.438 (3)            | C10  | C9   | 1.374 (4)            |
| C14  | C2   | 1.420 (3)            | C10  | C11  | 1.401 (4)            |
| C13  | C8   | 1.414 (3)            | C20  | C21  | 1.390 (3)            |

|     |     |           |     |     |           |
|-----|-----|-----------|-----|-----|-----------|
| C13 | C12 | 1.405 (3) | C20 | C19 | 1.389 (4) |
| C8  | C7  | 1.461 (3) | C18 | C17 | 1.392 (3) |
| C8  | C9  | 1.405 (3) | C18 | C19 | 1.394 (4) |
| C5  | C4  | 1.393 (4) | C11 | C12 | 1.378 (4) |
| C5  | C6  | 1.377 (4) |     |     |           |

**Table S5 Bond Angles for 3a.**

| Atom | Atom | Atom | Angle/°     | Atom | Atom | Atom | Angle/°   |
|------|------|------|-------------|------|------|------|-----------|
| C3   | N2   | C2   | 119.2 (2)   | N2   | C7   | C6   | 117.4 (2) |
| C3   | N2   | C7   | 120.9 (2)   | C6   | C7   | C8   | 122.1 (2) |
| C7   | N2   | C2   | 119.86 (19) | C3   | C4   | C5   | 119.4 (2) |
| C15  | N1   | C1   | 112.1 (2)   | C17  | C16  | C1   | 120.0 (2) |
| C15  | C14  | C13  | 132.0 (2)   | C17  | C16  | C21  | 118.6 (2) |
| C15  | C14  | C2   | 106.1 (2)   | C21  | C16  | C1   | 121.3 (2) |
| C2   | C14  | C13  | 121.8 (2)   | C9   | C10  | C11  | 120.3 (2) |
| N1   | C15  | C14  | 107.6 (2)   | C5   | C6   | C7   | 121.6 (2) |
| C8   | C13  | C14  | 117.1 (2)   | N1   | C1   | C2   | 104.7 (2) |
| C12  | C13  | C14  | 123.1 (2)   | N1   | C1   | C16  | 119.5 (2) |
| C12  | C13  | C8   | 119.8 (2)   | C2   | C1   | C16  | 135.5 (2) |
| C13  | C8   | C7   | 120.5 (2)   | C10  | C9   | C8   | 120.8 (2) |
| C9   | C8   | C13  | 118.7 (2)   | C19  | C20  | C21  | 120.1 (2) |
| C9   | C8   | C7   | 120.6 (2)   | C17  | C18  | C19  | 120.4 (2) |
| C6   | C5   | C4   | 119.2 (2)   | C18  | C17  | C16  | 120.5 (2) |
| N2   | C2   | C14  | 119.4 (2)   | C12  | C11  | C10  | 120.2 (2) |
| C1   | C2   | N2   | 131.1 (2)   | C20  | C21  | C16  | 120.8 (2) |
| C1   | C2   | C14  | 109.4 (2)   | C20  | C19  | C18  | 119.6 (2) |
| C4   | C3   | N2   | 121.3 (2)   | C11  | C12  | C13  | 120.1 (2) |
| N2   | C7   | C8   | 120.4 (2)   |      |      |      |           |

**Table S6 Hydrogen Atom Coordinates ( $\text{\AA} \times 10^4$ ) and Isotropic Displacement Parameters ( $\text{\AA}^2 \times 10^3$ ) for 3a.**

| Atom | x     | y    | z    | U(eq) |
|------|-------|------|------|-------|
| H1   | 4607  | 4998 | 6905 | 18    |
| H15  | 2674  | 3550 | 6284 | 19    |
| H5   | 8686  | 1818 | 3575 | 25    |
| H3   | 8002  | 4460 | 5264 | 22    |
| H4   | 9448  | 3721 | 4387 | 24    |
| H10  | 2084  | -765 | 3586 | 25    |
| H6   | 6443  | 784  | 3630 | 23    |
| H9   | 4466  | -31  | 3653 | 22    |
| H20  | 10722 | 4398 | 7110 | 22    |
| H18  | 8451  | 8003 | 7382 | 23    |
| H17  | 6352  | 6921 | 6788 | 21    |

|     |       |      |      |    |
|-----|-------|------|------|----|
| H11 | 586   | 171  | 4418 | 24 |
| H21 | 8634  | 3317 | 6508 | 20 |
| H19 | 10644 | 6753 | 7539 | 23 |
| H12 | 1480  | 1853 | 5312 | 23 |

1*H*-dibenzo[*b,g*]pyrido[2,1,6-*de*]pyrrolo[2,3,4-*ij*]quinolizin-14-ium bromide (**13**).

Single crystals of **13** were growth from methanol/hexane at room temperature.

(CCDC 2049334).

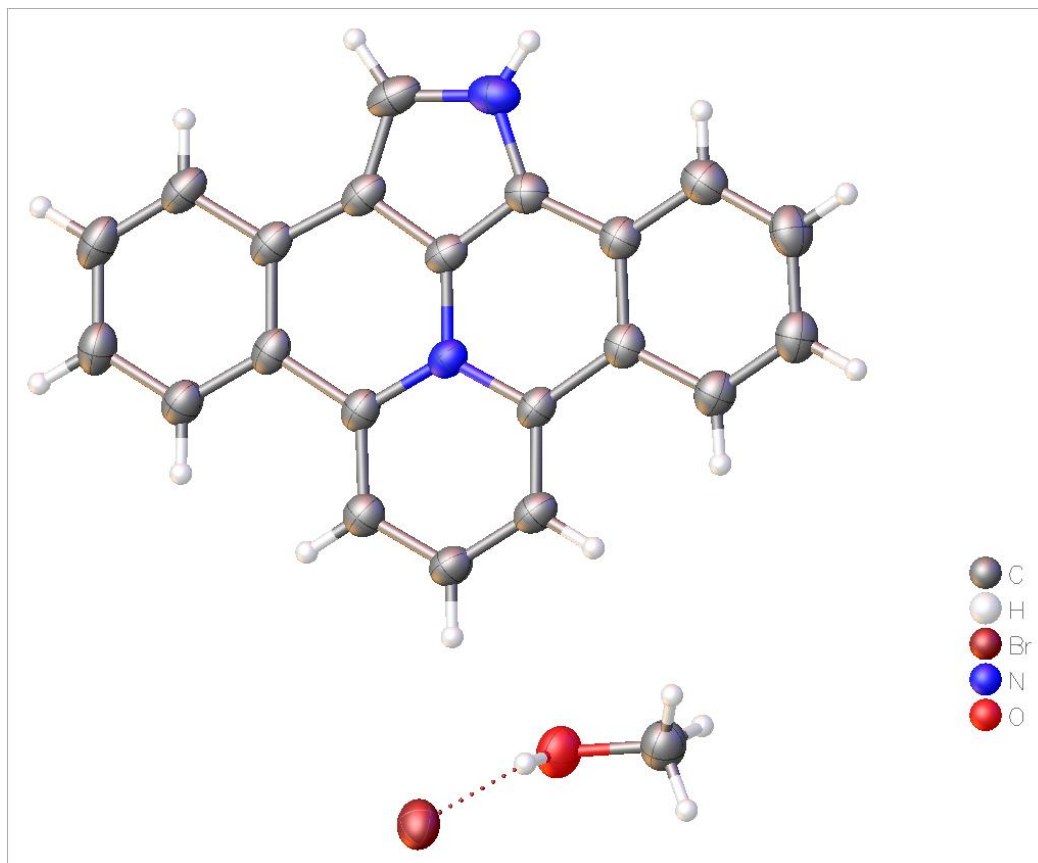

**Crystal Data** for  $\text{C}_{22}\text{H}_{17}\text{BrN}_2\text{O}$  ( $M = 405.28$  g/mol): triclinic, space group P-1 (no. 2),  $a = 7.7049(3)$  Å,  $b = 9.5333(4)$  Å,  $c = 12.7349(3)$  Å,  $\alpha = 111.349(3)^\circ$ ,  $\beta = 92.627(2)^\circ$ ,  $\gamma = 98.001(3)^\circ$ ,  $V = 858.01(6)$  Å<sup>3</sup>,  $Z = 2$ ,  $T = 100(2)$  K,  $\mu(\text{CuK}\alpha) = 3.366$  mm<sup>-1</sup>,  $D_{\text{calc}} = 1.569$  g/cm<sup>3</sup>, 7090 reflections measured ( $7.494^\circ \leq 2\theta \leq 139.994^\circ$ ), 3243 unique ( $R_{\text{int}} = 0.0195$ ,  $R_{\text{sigma}} = 0.0241$ ) which were used in all calculations. The final  $R_1$  was 0.0343 ( $I \geq 2\sigma(I)$ ) and  $wR_2$  was 0.0948 ( $I \geq 2\sigma(I)$ ).

**Table S7 Crystal data and structure refinement for 13.**

|                     |                                                  |
|---------------------|--------------------------------------------------|
| Identification code | 13                                               |
| Empirical formula   | $\text{C}_{22}\text{H}_{17}\text{BrN}_2\text{O}$ |
| Formula weight      | 405.28                                           |
| Temperature/K       | 112.0(5)                                         |
| Crystal system      | triclinic                                        |

|                                                |                                                               |
|------------------------------------------------|---------------------------------------------------------------|
| Spacegroup                                     | P-1                                                           |
| a/Å                                            | 7.7049(3)                                                     |
| b/Å                                            | 9.5333(4)                                                     |
| c/Å                                            | 12.7349(3)                                                    |
| $\alpha/^\circ$                                | 111.349(3)                                                    |
| $\beta/^\circ$                                 | 92.627(2)                                                     |
| $\gamma/^\circ$                                | 98.001(3)                                                     |
| Volume/Å <sup>3</sup>                          | 858.01(6)                                                     |
| Z                                              | 2                                                             |
| $D_{\text{calc}}/\text{cm}^3$                  | 1.569                                                         |
| $\mu/\text{mm}^{-1}$                           | 3.366                                                         |
| F(000)                                         | 412.0                                                         |
| Crystalsize/mm <sup>3</sup>                    | $0.16 \times 0.09 \times 0.05$                                |
| Radiation                                      | CuK $\alpha$ ( $\lambda = 1.54184$ )                          |
| 2 $\Theta$ range for data collection/ $^\circ$ | 7.494 to 139.994                                              |
| Indexranges                                    | $-9 \leq h \leq 9, -11 \leq k \leq 11, -12 \leq l \leq 15$    |
| Reflectionscollected                           | 7090                                                          |
| Independentreflections                         | 3243 [ $R_{\text{int}} = 0.0195, R_{\text{sigma}} = 0.0241$ ] |
| Data/restraints/parameters                     | 3243/0/238                                                    |
| Goodness-of-fit on $F^2$                       | 1.084                                                         |
| Final R indexes [ $I \geq 2\sigma(I)$ ]        | $R_1 = 0.0343, wR_2 = 0.0948$                                 |
| Final R indexes [all data]                     | $R_1 = 0.0388, wR_2 = 0.0974$                                 |
| Largest diff. peak/hole / e Å <sup>-3</sup>    | 0.91/-0.64                                                    |

**Table S8 Fractional Atomic Coordinates ( $\times 10^4$ ) and Equivalent Isotropic Displacement Parameters (Å<sup>2</sup> $\times 10^3$ ) for 13.  $U_{\text{eq}}$  is defined as 1/3 of the trace of the orthogonalised  $U_{\text{ij}}$  tensor.**

| Atom | x        | y         | z          | U(eq)     |
|------|----------|-----------|------------|-----------|
| Br01 | 581.9(4) | 8833.5(3) | 2505.1(2)  | 42.21(12) |
| O003 | 4827(3)  | 9252(2)   | 2517.6(16) | 44.4(5)   |
| C00Q | 5360(4)  | 8753(4)   | 1406(2)    | 44.5(6)   |
| N002 | 7380(2)  | 5512(2)   | 4502.4(16) | 27.4(4)   |
| N004 | 8791(3)  | 2013(3)   | 4138(2)    | 38.1(6)   |
| N006 | 8479(3)  | 2531(3)   | 5290(2)    | 38.9(7)   |
| C00H | 7323(3)  | 4706(3)   | 7609(2)    | 36.8(6)   |
| C00P | 9034(4)  | 2216(3)   | 637(2)     | 39.9(6)   |
| C00C | 7356(3)  | 4943(3)   | 6581(2)    | 31.4(5)   |
| C00B | 6318(3)  | 7838(3)   | 5339(2)    | 32.3(5)   |
| C00F | 6823(3)  | 6560(3)   | 5449(2)    | 28.9(5)   |
| C00G | 6940(3)  | 7002(3)   | 3412(2)    | 32.2(5)   |
| C00O | 6761(3)  | 5753(4)   | 8538(2)    | 41.2(6)   |

|      |         |         |            |         |
|------|---------|---------|------------|---------|
| C00J | 6384(3) | 8061(3) | 4329(2)    | 32.8(5) |
| C00E | 8495(3) | 3163(3) | 2606(2)    | 30.9(5) |
| C00D | 8044(3) | 4508(3) | 2512(2)    | 31.1(5) |
| C00M | 6223(4) | 7054(4) | 8467(2)    | 40.9(6) |
| C00N | 8620(3) | 3547(3) | 544(2)     | 38.3(6) |
| C00A | 6809(3) | 6263(3) | 6505(2)    | 31.1(5) |
| C00L | 8993(3) | 2030(3) | 1661(2)    | 37.9(6) |
| C00I | 8144(3) | 4679(3) | 1462(2)    | 34.1(5) |
| C00K | 6245(3) | 7313(3) | 7468(2)    | 35.7(5) |
| C004 | 8791(3) | 2013(3) | 4138(2)    | 38.1(6) |
| C005 | 7876(3) | 4218(3) | 4584(2)    | 28.8(5) |
| C006 | 8479(3) | 2531(3) | 5290(2)    | 38.9(7) |
| C007 | 8413(3) | 3065(3) | 3702(2)    | 31.3(5) |
| C008 | 7453(3) | 5698(3) | 3466.2(19) | 28.3(5) |
| C009 | 7906(3) | 3897(3) | 5570(2)    | 31.8(5) |

**Table S9 Anisotropic Displacement Parameters ( $\text{\AA}^2 \times 10^3$ ) for 13. The Anisotropic displacement factor exponent takes the form:  $-2\pi^2[h^2a^{*2}U_{11}+2hka^*b^*U_{12}+\dots]$ .**

| Atom | U <sub>11</sub> | U <sub>22</sub> | U <sub>33</sub> | U <sub>23</sub> | U <sub>13</sub> | U <sub>12</sub> |
|------|-----------------|-----------------|-----------------|-----------------|-----------------|-----------------|
| Br01 | 44.41(18)       | 39.32(18)       | 40.96(18)       | 13.79(12)       | 11.67(12)       | 1.84(12)        |
| O003 | 45.2(11)        | 53.9(12)        | 35.7(10)        | 18.9(9)         | 3.4(8)          | 8.1(9)          |
| C00Q | 43.1(15)        | 53.2(18)        | 40.2(14)        | 20.3(13)        | 5.6(12)         | 9.4(13)         |
| N002 | 23.2(9)         | 30.8(10)        | 30.2(10)        | 15.2(8)         | 0.7(7)          | 1.4(8)          |
| N004 | 29.0(11)        | 31.4(12)        | 54.8(15)        | 17.8(11)        | 0.6(10)         | 4.7(9)          |
| N006 | 28.7(11)        | 42.1(14)        | 54.1(15)        | 31.4(12)        | -5.3(10)        | -1.6(10)        |
| C00H | 31.5(12)        | 46.4(15)        | 39.0(13)        | 27.1(12)        | -1.3(10)        | -1.2(11)        |
| C00P | 38.8(14)        | 40.7(15)        | 31.7(13)        | 5.7(11)         | 3.0(10)         | 1.0(11)         |
| C00C | 23.1(10)        | 39.7(13)        | 34.5(12)        | 20.9(11)        | -2.1(9)         | -2.7(9)         |
| C00B | 27.3(11)        | 35.6(13)        | 34.2(12)        | 14.5(10)        | 1.5(9)          | 2.7(10)         |
| C00F | 22.3(10)        | 36.1(13)        | 29.6(11)        | 15.7(10)        | 0.2(8)          | 0.2(9)          |
| C00G | 29.2(11)        | 35.4(13)        | 35.0(12)        | 18.9(10)        | -0.8(9)         | 1.2(10)         |
| C00O | 35.2(13)        | 58.9(18)        | 35.9(13)        | 28.2(13)        | 1.9(11)         | 0.1(12)         |
| C00J | 32.5(12)        | 35.1(13)        | 34.4(12)        | 17.7(10)        | 1.2(10)         | 5.3(10)         |
| C00E | 25.7(11)        | 32.4(12)        | 32.4(12)        | 11.9(10)        | 0.6(9)          | -0.3(9)         |
| C00D | 24.6(11)        | 35.1(13)        | 31.1(12)        | 12.4(10)        | -0.3(9)         | -1.7(9)         |
| C00M | 37.6(13)        | 55.3(17)        | 31.8(13)        | 19.4(12)        | 6.2(10)         | 5.2(12)         |
| C00N | 32.7(12)        | 46.4(15)        | 31.6(12)        | 13.0(11)        | -0.2(10)        | -0.5(11)        |
| C00A | 23.0(11)        | 41.4(14)        | 30.8(12)        | 18.7(11)        | 0.2(9)          | -1.9(10)        |
| C00L | 32.5(12)        | 36.0(14)        | 42.0(14)        | 11.8(11)        | 2.2(10)         | 3.0(10)         |
| C00I | 30.4(12)        | 39.7(14)        | 31.7(12)        | 14.5(11)        | -0.1(10)        | 1.9(10)         |
| C00K | 32.2(12)        | 44.2(15)        | 35.2(13)        | 20.5(11)        | 3.0(10)         | 5.4(11)         |

|      |          |          |          |          |          |          |
|------|----------|----------|----------|----------|----------|----------|
| C004 | 29.0(11) | 31.4(12) | 54.8(15) | 17.8(11) | 0.6(10)  | 4.7(9)   |
| C005 | 22.7(10) | 30.9(12) | 35.1(12) | 17.4(10) | -1.7(9)  | -0.9(9)  |
| C006 | 28.7(11) | 42.1(14) | 54.1(15) | 31.4(12) | -5.3(10) | -1.6(10) |
| C007 | 25.6(11) | 30.0(12) | 37.0(12) | 12.6(10) | 0.1(9)   | 1.0(9)   |
| C008 | 24.4(10) | 33.1(12) | 28.1(11) | 15.1(10) | -1.2(9)  | -1.3(9)  |
| C009 | 24.2(10) | 38.1(13) | 36.9(12) | 22.0(11) | -3.0(9)  | -2.7(9)  |

**Table S10 BondLengthsfor 13.**

| Atom | Atom | Length/Å | Atom | Atom | Length/Å |
|------|------|----------|------|------|----------|
| O003 | C00Q | 1.419(3) | C00F | C00A | 1.471(3) |
| N002 | C00F | 1.388(3) | C00G | C00J | 1.369(4) |
| N002 | C005 | 1.378(3) | C00G | C008 | 1.379(3) |
| N002 | C008 | 1.397(3) | C00O | C00M | 1.393(4) |
| N004 | C006 | 1.411(4) | C00E | C00D | 1.417(4) |
| N004 | C007 | 1.368(3) | C00E | C00L | 1.405(4) |
| N006 | C004 | 1.411(4) | C00E | C007 | 1.437(3) |
| N006 | C009 | 1.361(4) | C00D | C00I | 1.409(3) |
| C00H | C00C | 1.408(3) | C00D | C008 | 1.471(4) |
| C00H | C00O | 1.375(4) | C00M | C00K | 1.382(4) |
| C00P | C00N | 1.394(4) | C00N | C00I | 1.377(4) |
| C00P | C00L | 1.380(4) | C00A | C00K | 1.404(4) |
| C00C | C00A | 1.416(4) | C004 | C007 | 1.368(3) |
| C00C | C009 | 1.436(4) | C005 | C007 | 1.382(4) |
| C00B | C00F | 1.381(3) | C005 | C009 | 1.397(3) |
| C00B | C00J | 1.380(3) | C006 | C009 | 1.361(4) |

**Table S11 BondAnglesfor 13.**

| Atom | Atom | Atom | Angle/°    | Atom | Atom | Atom | Angle/°  |
|------|------|------|------------|------|------|------|----------|
| C00F | N002 | C008 | 123.2(2)   | C00C | C00A | C00F | 121.8(2) |
| C005 | N002 | C00F | 118.55(19) | C00K | C00A | C00C | 118.7(2) |
| C005 | N002 | C008 | 118.2(2)   | C00K | C00A | C00F | 119.5(2) |
| C007 | N004 | C006 | 108.7(2)   | C00P | C00L | C00E | 120.2(3) |
| C009 | N006 | C004 | 108.9(2)   | C00N | C00I | C00D | 120.6(3) |
| C00O | C00H | C00C | 120.2(3)   | C00M | C00K | C00A | 120.4(3) |
| C00L | C00P | C00N | 120.0(3)   | C007 | C004 | N006 | 108.7(2) |
| C00H | C00C | C00A | 119.8(2)   | N002 | C005 | C007 | 124.6(2) |
| C00H | C00C | C009 | 123.6(2)   | N002 | C005 | C009 | 124.5(2) |
| C00A | C00C | C009 | 116.6(2)   | C007 | C005 | C009 | 110.9(2) |
| C00F | C00B | C00J | 121.0(2)   | C009 | C006 | N004 | 108.9(2) |
| N002 | C00F | C00A | 119.0(2)   | N004 | C007 | C00E | 133.7(2) |
| C00B | C00F | N002 | 117.2(2)   | N004 | C007 | C005 | 105.9(2) |
| C00B | C00F | C00A | 123.8(2)   | C004 | C007 | C00E | 133.7(2) |



|                |          |           |               |
|----------------|----------|-----------|---------------|
| C00J C00G C008 | 121.6(2) | C004 C007 | C005 105.9(2) |
| C00H C00O C00M | 120.2(2) | C005 C007 | C00E 120.4(2) |
| C00G C00J C00B | 120.2(2) | N002 C008 | C00D 118.8(2) |
| C00D C00E C007 | 116.0(2) | C00G C008 | N002 116.8(2) |
| C00L C00E C00D | 120.1(2) | C00G C008 | C00D 124.4(2) |
| C00L C00E C007 | 124.0(2) | N006 C009 | C00C 134.7(2) |
| C00E C00D C008 | 121.9(2) | N006 C009 | C005 105.7(2) |
| C00I C00D C00E | 118.3(2) | C005 C009 | C00C 119.6(2) |
| C00I C00D C008 | 119.8(2) | C006 C009 | C00C 134.7(2) |
| C00K C00M C00O | 120.7(3) | C006 C009 | C005 105.7(2) |
| C00I C00N C00P | 120.8(2) |           |               |

**Table S12 TorsionAnglesfor 13.**

| A    | B    | C    | D    | Angle/°   | A    | B    | C    | D    | Angle/°   |
|------|------|------|------|-----------|------|------|------|------|-----------|
| N002 | C00F | C00A | C00C | 0.3(3)    | C00D | C00E | C007 | C004 | -177.4(2) |
| N002 | C00F | C00A | C00K | -179.9(2) | C00D | C00E | C007 | C005 | 1.6(3)    |
| N002 | C005 | C007 | N004 | 179.7(2)  | C00N | C00P | C00L | C00E | 1.5(4)    |
| N002 | C005 | C007 | C00E | 0.4(4)    | C00A | C00C | C009 | N006 | -178.7(2) |
| N002 | C005 | C007 | C004 | 179.7(2)  | C00A | C00C | C009 | C005 | -0.1(3)   |
| N002 | C005 | C009 | N006 | -179.6(2) | C00A | C00C | C009 | C006 | -178.7(2) |
| N002 | C005 | C009 | C00C | 1.4(3)    | C00L | C00P | C00N | C00I | -0.9(4)   |
| N002 | C005 | C009 | C006 | -179.6(2) | C00L | C00E | C00D | C00I | -1.2(3)   |
| N004 | C006 | C009 | C00C | 178.5(3)  | C00L | C00E | C00D | C008 | 177.7(2)  |
| N004 | C006 | C009 | C005 | -0.2(3)   | C00L | C00E | C007 | N004 | 2.3(4)    |
| N006 | C004 | C007 | C00E | 179.2(3)  | C00L | C00E | C007 | C004 | 2.3(4)    |
| N006 | C004 | C007 | C005 | 0.1(3)    | C00L | C00E | C007 | C005 | -178.7(2) |
| C00H | C00C | C00A | C00F | 179.9(2)  | C00I | C00D | C008 | N002 | -179.4(2) |
| C00H | C00C | C00A | C00K | 0.1(3)    | C00I | C00D | C008 | C00G | 1.2(4)    |
| C00H | C00C | C009 | N006 | 0.7(4)    | C004 | N006 | C009 | C00C | 178.5(3)  |
| C00H | C00C | C009 | C005 | 179.3(2)  | C004 | N006 | C009 | C005 | -0.2(3)   |
| C00H | C00C | C009 | C006 | 0.7(4)    | C005 | N002 | C00F | C00B | -179.4(2) |
| C00H | C00O | C00M | C00K | 0.0(4)    | C005 | N002 | C00F | C00A | 0.9(3)    |
| C00P | C00N | C00I | C00D | -0.7(4)   | C005 | N002 | C008 | C00G | 179.7(2)  |
| C00C | C00H | C00O | C00M | -0.1(4)   | C005 | N002 | C008 | C00D | 0.3(3)    |
| C00C | C00A | C00K | C00M | -0.2(4)   | C006 | N004 | C007 | C00E | 179.2(3)  |
| C00B | C00F | C00A | C00C | -179.3(2) | C006 | N004 | C007 | C005 | 0.1(3)    |
| C00B | C00F | C00A | C00K | 0.5(3)    | C007 | N004 | C006 | C009 | 0.1(3)    |
| C00F | N002 | C005 | C007 | 178.3(2)  | C007 | C00E | C00D | C00I | 178.5(2)  |
| C00F | N002 | C005 | C009 | -1.8(3)   | C007 | C00E | C00D | C008 | -2.6(3)   |
| C00F | N002 | C008 | C00G | 0.1(3)    | C007 | C00E | C00L | C00P | 179.9(2)  |
| C00F | N002 | C008 | C00D | -179.3(2) | C007 | C005 | C009 | N006 | 0.3(3)    |

|                               |                                 |
|-------------------------------|---------------------------------|
| C00F C00B C00J C00G 0.6(4)    | C007 C005 C009 C00C -178.7(2)   |
| C00F C00A C00K C00M -180.0(2) | C007 C005 C009 C006 0.3(3)      |
| C00O C00H C00C C00A 0.1(4)    | C008 N002 C00F C00B 0.2(3)      |
| C00O C00H C00C C009 -179.3(2) | C008 N002 C00F C00A -179.50(19) |
| C00O C00M C00K C00A 0.1(4)    | C008 N002 C005 C007 -1.3(3)     |
| C00J C00B C00F N002 -0.6(3)   | C008 N002 C005 C009 178.6(2)    |
| C00J C00B C00F C00A 179.1(2)  | C008 C00G C00J C00B -0.2(4)     |
| C00J C00G C008 N002 -0.1(3)   | C008 C00D C00I C00N -177.2(2)   |
| C00J C00G C008 C00D 179.3(2)  | C009 N006 C004 C007 0.1(3)      |
| C00E C00D C00I C00N 1.7(3)    | C009 C00C C00A C00F -0.7(3)     |
| C00E C00D C008 N002 1.7(3)    | C009 C00C C00A C00K 179.5(2)    |
| C00E C00D C008 C00G -177.7(2) | C009 C005 C007 N004 -0.3(3)     |
| C00D C00E C00L C00P -0.4(4)   | C009 C005 C007 C00E -179.5(2)   |
| C00D C00E C007 N004 -177.4(2) | C009 C005 C007 C004 -0.3(3)     |

**Table S13 Hydrogen Atom Coordinates ( $\text{\AA} \times 10^4$ ) and Isotropic Displacement Parameters ( $\text{\AA}^2 \times 10^3$ ) for 13.**

| Atom | <i>x</i> | <i>y</i> | <i>z</i> | U(eq) |
|------|----------|----------|----------|-------|
| H003 | 3752.5   | 9032.3   | 2482.23  | 67    |
| H00D | 4896.57  | 9313.06  | 997.4    | 67    |
| H00E | 4920.03  | 7682.7   | 1020.21  | 67    |
| H00F | 6623.2   | 8927.46  | 1450.17  | 67    |
| H004 | 9158.4   | 1175.53  | 3771.54  | 46    |
| H006 | 8626.05  | 2060.89  | 5741.18  | 47    |
| H00H | 7683.37  | 3839.71  | 7660.48  | 44    |
| H00P | 9337.84  | 1452.9   | 8.09     | 48    |
| H00B | 5928.25  | 8559.55  | 5954.95  | 39    |
| H00G | 6973.53  | 7165.33  | 2735.78  | 39    |
| H00O | 6739.76  | 5592.22  | 9215.53  | 49    |
| H00J | 6049.93  | 8932.5   | 4270.66  | 39    |
| H00M | 5844.31  | 7756.86  | 9099.45  | 49    |
| H00N | 8667.13  | 3671.61  | -146.04  | 46    |
| H00L | 9295.56  | 1152.06  | 1726.18  | 46    |
| H00I | 7884.53  | 5564.29  | 1387.45  | 41    |
| H00K | 5883.84  | 8188.08  | 7433.24  | 43    |
| H00A | 9188.3   | 1107.34  | 3741.68  | 46    |
| H00C | 8638.03  | 2022.61  | 5777.89  | 47    |

**Table S14 Atomic Occupancy for 13.**

**Atom Occupancy   Atom Occupancy   Atom Occupancy**

|              |              |              |
|--------------|--------------|--------------|
| N004 0.56(3) | H004 0.56(3) | N006 0.44(3) |
| H006 0.44(3) | C004 0.44(3) | H00A 0.44(3) |
| C006 0.56(3) | H00C 0.56(3) |              |

3-Phenylpyrido[2,1-*a*]pyrrolo[3,2-*c*]isoquinolin-4-ium bromide (**17a**).

Single crystals of **17a** were growth from methanol/diethyl ether at room temperature.

(CCDC 2049337).

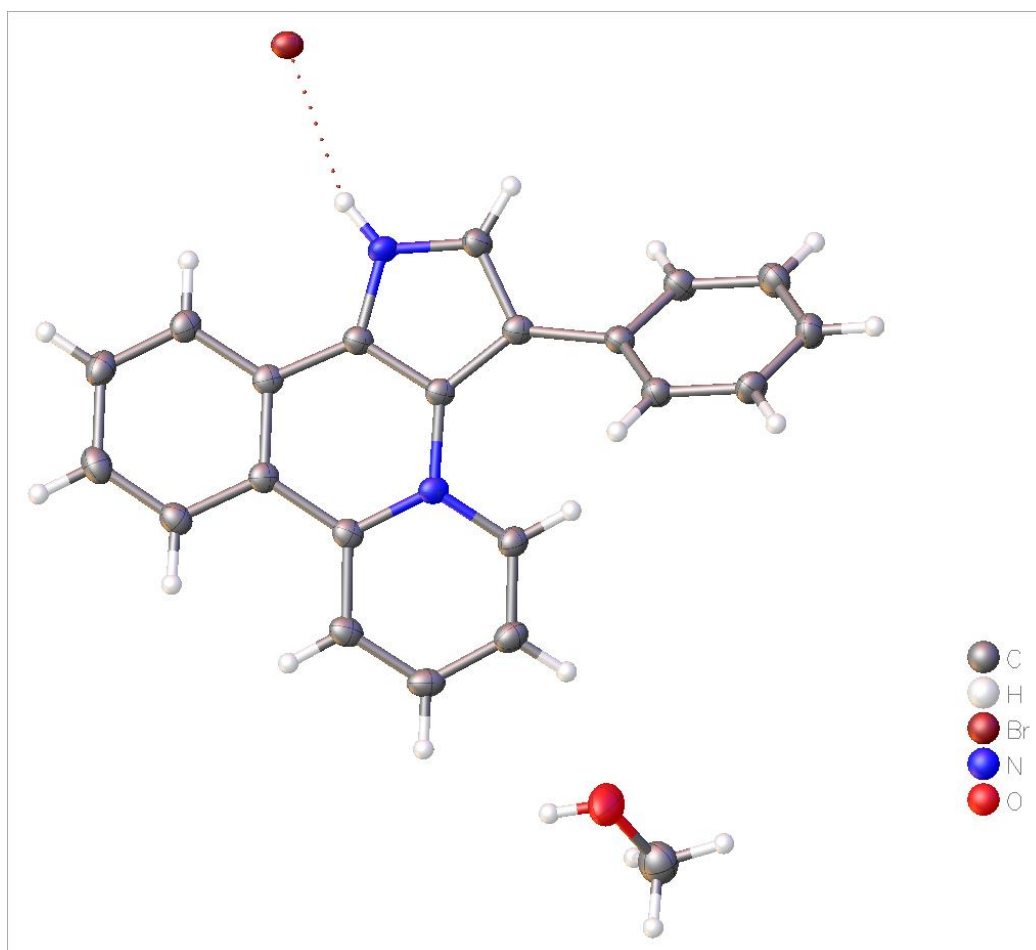

**Crystal Data** for  $C_{22}H_{19}BrN_2O$  ( $M = 407.30$  g/mol): monoclinic, space group  $C2/c$  (no. 15),  $a = 25.8474(4)$  Å,  $b = 10.7503(2)$  Å,  $c = 13.1889(3)$  Å,  $\beta = 99.922(2)^\circ$ ,  $V = 3609.95(12)$  Å<sup>3</sup>,  $Z = 8$ ,  $T = 100(2)$  K,  $\mu(\text{CuK}\alpha) = 3.200$  mm<sup>-1</sup>,  $D_{\text{calc}} = 1.499$  g/cm<sup>3</sup>, 9610 reflections measured ( $6.944^\circ \leq 2\theta \leq 139.99^\circ$ ), 3421 unique ( $R_{\text{int}} = 0.0304$ ,  $R_{\text{sigma}} = 0.0325$ ) which were used in all calculations. The final  $R_1$  was 0.0299 ( $I \geq 2\sigma(I)$ ) and  $wR_2$  was 0.0784 ( $I \geq 2\sigma(I)$ ).

**Table S15 Crystal data and structure refinement for 17a.**

|                    |                      |
|--------------------|----------------------|
| Identificationcode | 17a                  |
| Empiricalformula   | $C_{22}H_{19}BrN_2O$ |
| Formulaweight      | 407.30               |
| Temperature/K      | 100.0(2)             |
| Crystalsystem      | monoclinic           |

|                                                |                                                               |
|------------------------------------------------|---------------------------------------------------------------|
| Spacegroup                                     | C2/c                                                          |
| a/Å                                            | 25.8474(4)                                                    |
| b/Å                                            | 10.7503(2)                                                    |
| c/Å                                            | 13.1889(3)                                                    |
| $\alpha/^\circ$                                | 90                                                            |
| $\beta/^\circ$                                 | 99.922(2)                                                     |
| $\gamma/^\circ$                                | 90                                                            |
| Volume/Å <sup>3</sup>                          | 3609.95(12)                                                   |
| Z                                              | 8                                                             |
| $D_{\text{calc}}/\text{cm}^3$                  | 1.499                                                         |
| $\mu/\text{mm}^{-1}$                           | 3.200                                                         |
| F(000)                                         | 1664.0                                                        |
| Crystalsize/mm <sup>3</sup>                    | $0.15 \times 0.11 \times 0.02$                                |
| Radiation                                      | CuK $\alpha$ ( $\lambda = 1.54184$ )                          |
| 2 $\Theta$ range for data collection/ $^\circ$ | 6.944 to 139.99                                               |
| Indexranges                                    | $-26 \leq h \leq 31, -12 \leq k \leq 13, -16 \leq l \leq 14$  |
| Reflectionscollected                           | 9610                                                          |
| Independentreflections                         | 3421 [ $R_{\text{int}} = 0.0304, R_{\text{sigma}} = 0.0325$ ] |
| Data/restraints/parameters                     | 3421/0/237                                                    |
| Goodness-of-fit on $F^2$                       | 1.103                                                         |
| Final R indexes [ $I \geq 2\sigma(I)$ ]        | $R_1 = 0.0299, wR_2 = 0.0784$                                 |
| Final R indexes [all data]                     | $R_1 = 0.0327, wR_2 = 0.0799$                                 |
| Largest diff. peak/hole / e Å <sup>-3</sup>    | 0.41/-0.62                                                    |

**Table S16 Fractional Atomic Coordinates ( $\times 10^4$ ) and Equivalent Isotropic Displacement Parameters (Å<sup>2</sup> $\times 10^3$ ) for 17a.  $U_{\text{eq}}$  is defined as 1/3 of the trace of the orthogonalised  $U_{ij}$  tensor.**

| Atom | <i>x</i>   | <i>y</i>   | <i>z</i>   | $U(\text{eq})$ |
|------|------------|------------|------------|----------------|
| Br01 | 4210.0(2)  | 7762.4(2)  | 3507.3(2)  | 20.88(9)       |
| O003 | 6912.8(7)  | -975.4(19) | 2506.9(15) | 41.7(5)        |
| C00Q | 7255.5(10) | -1513(3)   | 1911(2)    | 38.0(6)        |
| N002 | 5004.2(7)  | 5404.0(16) | 3718.9(13) | 19.7(4)        |
| N004 | 5598.7(7)  | 2438.6(16) | 3853.1(13) | 17.5(3)        |
| C00K | 7183.0(9)  | 6240(2)    | 4156.0(18) | 27.5(5)        |
| C00F | 6208.4(9)  | 792(2)     | 3748.3(17) | 24.5(5)        |
| C00N | 3732.6(9)  | 1677(2)    | 3773.9(17) | 26.3(5)        |
| C00O | 7235.3(8)  | 4672(2)    | 5465.5(17) | 24.1(5)        |
| C00M | 6716.7(8)  | 4332(2)    | 5101.8(16) | 21.4(4)        |
| C00J | 7467.4(8)  | 5636(2)    | 5004.0(17) | 26.6(5)        |
| C00C | 4548.7(8)  | 3346(2)    | 3705.0(15) | 18.7(4)        |
| C00L | 4233.9(8)  | 1233(2)    | 3834.4(16) | 22.9(4)        |
| C00D | 5806.7(9)  | -75(2)     | 3742.2(17) | 24.3(5)        |

|      |           |            |            |         |
|------|-----------|------------|------------|---------|
| C00G | 6666.7(8) | 5903(2)    | 3785.8(17) | 23.7(4) |
| C00E | 5189.1(8) | 1599.5(19) | 3828.9(15) | 18.9(4) |
| C00A | 5306.5(9) | 327(2)     | 3777.7(15) | 22.0(4) |
| C00H | 4657.4(8) | 2057(2)    | 3800.8(15) | 19.2(4) |
| C00I | 4028.4(8) | 3779(2)    | 3616.0(15) | 21.7(4) |
| C00B | 6097.0(8) | 2029(2)    | 3805.5(16) | 20.9(4) |
| C00P | 3625.2(9) | 2953(2)    | 3662.6(17) | 25.0(5) |
| C005 | 5511.3(8) | 5784(2)    | 3847.7(15) | 20.5(4) |
| C006 | 4988.9(8) | 4142.5(19) | 3747.2(15) | 18.9(4) |
| C007 | 5506.4(8) | 3724.5(19) | 3890.9(15) | 17.8(4) |
| C008 | 5849.9(8) | 4779(2)    | 3970.3(15) | 19.3(4) |
| C009 | 6424.0(8) | 4959.8(19) | 4265.6(16) | 19.6(4) |

**Table S17 Anisotropic Displacement Parameters ( $\text{\AA}^2 \times 10^3$ ) for 17a. The Anisotropic displacement factor exponent takes the form:  $-2\pi^2[h^2a^{*2}U_{11}+2hka^*b^*U_{12}+\dots]$ .**

| Atom | U <sub>11</sub> | U <sub>22</sub> | U <sub>33</sub> | U <sub>23</sub> | U <sub>13</sub> | U <sub>12</sub> |
|------|-----------------|-----------------|-----------------|-----------------|-----------------|-----------------|
| Br01 | 22.69(13)       | 17.21(14)       | 20.89(14)       | 0.45(7)         | -1.47(9)        | 1.78(8)         |
| O003 | 28.7(9)         | 42.9(11)        | 49.2(11)        | -19.1(9)        | -5.3(8)         | -2.1(8)         |
| C00Q | 36.9(14)        | 39.1(14)        | 37.4(14)        | 3.1(11)         | 4.7(11)         | -2.7(11)        |
| N002 | 19.4(8)         | 16.7(8)         | 21.4(9)         | 1.4(7)          | -1.4(7)         | 3.4(7)          |
| N004 | 19.7(9)         | 17.4(8)         | 13.8(8)         | -0.2(6)         | -1.7(6)         | 2.2(7)          |
| C00K | 25.4(11)        | 25.2(11)        | 31.5(12)        | 4.2(9)          | 3.4(9)          | -3.6(9)         |
| C00F | 23.7(10)        | 24.6(11)        | 23.5(11)        | -0.6(9)         | -0.3(8)         | 5.5(9)          |
| C00N | 25.3(11)        | 29.2(12)        | 23.7(11)        | -4.2(9)         | 2.3(8)          | -7.4(9)         |
| C00O | 21.1(10)        | 24.3(11)        | 24.6(11)        | 3.1(9)          | -2.8(8)         | 2.4(9)          |
| C00M | 21.3(10)        | 19.3(10)        | 22.8(10)        | 2.0(8)          | 1.5(8)          | 0.4(8)          |
| C00J | 19.6(10)        | 27.3(11)        | 31.0(12)        | 0.7(10)         | -1.2(9)         | -2.6(9)         |
| C00C | 20.9(10)        | 21.1(10)        | 12.8(9)         | -1.3(8)         | -0.8(7)         | 0.7(8)          |
| C00L | 25.9(11)        | 21.4(11)        | 20.1(10)        | -0.1(8)         | 0.8(8)          | -3.0(9)         |
| C00D | 31.3(12)        | 19.1(10)        | 20.5(10)        | -1.4(8)         | -1.2(9)         | 4.2(9)          |
| C00G | 24.3(11)        | 22.3(10)        | 22.4(11)        | 2.9(8)          | -2.2(8)         | 0.0(9)          |
| C00E | 22.1(10)        | 19.8(10)        | 13.4(9)         | -0.6(8)         | -0.9(7)         | -1.1(8)         |
| C00A | 26.6(11)        | 20.0(10)        | 17.3(10)        | -1.2(8)         | -2.2(8)         | -1.2(9)         |
| C00H | 20.5(10)        | 21.3(10)        | 14.2(10)        | -1.0(8)         | -1.7(8)         | 0.3(8)          |
| C00I | 20.9(10)        | 25.1(11)        | 17.3(10)        | -1.2(8)         | -2.0(8)         | 1.6(9)          |
| C00B | 19.5(10)        | 22.3(10)        | 19.6(10)        | -1.5(8)         | -0.3(8)         | 1.6(8)          |
| C00P | 19.5(10)        | 31.1(12)        | 23.1(11)        | -4.0(9)         | 0.0(8)          | 2.5(9)          |
| C005 | 20.7(10)        | 18.3(10)        | 20.4(10)        | 0.3(8)          | -2.4(8)         | -0.7(8)         |
| C006 | 20.5(10)        | 18.5(10)        | 16.4(10)        | 0.6(8)          | -0.7(7)         | 0.5(8)          |
| C007 | 19.4(10)        | 18.0(10)        | 14.4(9)         | 1.0(7)          | -1.4(7)         | 1.0(8)          |
| C008 | 21.5(10)        | 19.8(10)        | 15.2(10)        | 1.1(8)          | -0.9(8)         | 1.5(8)          |

|      |          |          |          |         |        |         |
|------|----------|----------|----------|---------|--------|---------|
| C009 | 20.9(10) | 17.1(10) | 19.9(10) | -0.3(8) | 0.7(8) | -0.3(8) |
|------|----------|----------|----------|---------|--------|---------|

**Table S18 Bond Lengths for 17a.**

| Atom | Atom | Length/Å | Atom | Atom | Length/Å |
|------|------|----------|------|------|----------|
| O003 | C00Q | 1.406(3) | C00M | C009 | 1.398(3) |
| N002 | C005 | 1.355(3) | C00C | C00H | 1.416(3) |
| N002 | C006 | 1.357(3) | C00C | C00I | 1.409(3) |
| N004 | C00E | 1.387(3) | C00C | C006 | 1.417(3) |
| N004 | C00B | 1.373(3) | C00L | C00H | 1.415(3) |
| N004 | C007 | 1.405(3) | C00D | C00A | 1.372(3) |
| C00K | C00J | 1.389(3) | C00G | C009 | 1.400(3) |
| C00K | C00G | 1.388(3) | C00E | C00A | 1.406(3) |
| C00F | C00D | 1.394(3) | C00E | C00H | 1.454(3) |
| C00F | C00B | 1.365(3) | C00I | C00P | 1.378(3) |
| C00N | C00L | 1.370(3) | C005 | C008 | 1.382(3) |
| C00N | C00P | 1.403(3) | C006 | C007 | 1.393(3) |
| C00O | C00M | 1.392(3) | C007 | C008 | 1.433(3) |
| C00O | C00J | 1.389(3) | C008 | C009 | 1.481(3) |

**Table S19 Bond Angles for 17a.**

| Atom | Atom | Atom | Angle/°    | Atom | Atom | Atom | Angle/°    |
|------|------|------|------------|------|------|------|------------|
| C005 | N002 | C006 | 109.25(17) | C00C | C00H | C00E | 120.35(19) |
| C00E | N004 | C007 | 120.47(17) | C00L | C00H | C00C | 118.23(19) |
| C00B | N004 | C00E | 120.57(18) | C00L | C00H | C00E | 121.40(19) |
| C00B | N004 | C007 | 118.93(18) | C00P | C00I | C00C | 120.2(2)   |
| C00G | C00K | C00J | 120.3(2)   | C00F | C00B | N004 | 121.6(2)   |
| C00B | C00F | C00D | 119.2(2)   | C00I | C00P | C00N | 119.8(2)   |
| C00L | C00N | C00P | 121.0(2)   | N002 | C005 | C008 | 111.00(19) |
| C00J | C00O | C00M | 120.5(2)   | N002 | C006 | C00C | 129.00(19) |
| C00O | C00M | C009 | 120.2(2)   | N002 | C006 | C007 | 107.11(18) |
| C00O | C00J | C00K | 119.6(2)   | C007 | C006 | C00C | 123.80(19) |
| C00H | C00C | C006 | 116.25(18) | N004 | C007 | C008 | 132.39(19) |
| C00I | C00C | C00H | 120.2(2)   | C006 | C007 | N004 | 118.53(18) |
| C00I | C00C | C006 | 123.5(2)   | C006 | C007 | C008 | 108.86(18) |
| C00N | C00L | C00H | 120.6(2)   | C005 | C008 | C007 | 103.76(18) |
| C00A | C00D | C00F | 119.7(2)   | C005 | C008 | C009 | 120.93(19) |
| C00K | C00G | C009 | 120.6(2)   | C007 | C008 | C009 | 134.71(19) |
| N004 | C00E | C00A | 117.64(19) | C00M | C009 | C00G | 118.83(19) |
| N004 | C00E | C00H | 119.68(18) | C00M | C009 | C008 | 121.71(19) |

C00A C00E C00H 122.59(19) C00G C009 C008 118.88(19)  
 C00D C00A C00E 121.4(2)

**Table S20 Torsion Angles for 17a.**

| A    | B    | C    | D    | Angle/°     | A    | B    | C    | D    | Angle/°     |
|------|------|------|------|-------------|------|------|------|------|-------------|
| N002 | C005 | C008 | C007 | 0.8(2)      | C00H | C00C | C00I | C00P | 2.6(3)      |
| N002 | C005 | C008 | C009 | -171.52(18) | C00H | C00C | C006 | N002 | -177.1(2)   |
| N002 | C006 | C007 | N004 | -174.22(17) | C00H | C00C | C006 | C007 | -1.1(3)     |
| N002 | C006 | C007 | C008 | 1.0(2)      | C00H | C00E | C00A | C00D | 175.95(19)  |
| N004 | C00E | C00A | C00D | -0.6(3)     | C00I | C00C | C00H | C00L | -1.8(3)     |
| N004 | C00E | C00H | C00C | 5.7(3)      | C00I | C00C | C00H | C00E | 176.19(18)  |
| N004 | C00E | C00H | C00L | -176.37(18) | C00I | C00C | C006 | N002 | 0.4(3)      |
| N004 | C007 | C008 | C005 | 173.2(2)    | C00I | C00C | C006 | C007 | 176.39(19)  |
| N004 | C007 | C008 | C009 | -16.0(4)    | C00B | N004 | C00E | C00A | 1.4(3)      |
| C00K | C00G | C009 | C00M | -2.3(3)     | C00B | N004 | C00E | C00H | -175.32(18) |
| C00K | C00G | C009 | C008 | 169.2(2)    | C00B | N004 | C007 | C006 | 168.27(18)  |
| C00F | C00D | C00A | C00E | -0.5(3)     | C00B | N004 | C007 | C008 | -5.6(3)     |
| C00N | C00L | C00H | C00C | 0.1(3)      | C00B | C00F | C00D | C00A | 1.0(3)      |
| C00N | C00L | C00H | C00E | -177.89(19) | C00P | C00N | C00L | C00H | 0.9(3)      |
| C00O | C00M | C009 | C00G | 1.9(3)      | C005 | N002 | C006 | C00C | 176.1(2)    |
| C00O | C00M | C009 | C008 | -169.3(2)   | C005 | N002 | C006 | C007 | -0.5(2)     |
| C00M | C00O | C00J | C00K | -1.8(3)     | C005 | C008 | C009 | C00M | 127.5(2)    |
| C00J | C00K | C00G | C009 | 0.6(4)      | C005 | C008 | C009 | C00G | -43.7(3)    |
| C00J | C00O | C00M | C009 | 0.1(3)      | C006 | N002 | C005 | C008 | -0.2(2)     |
| C00C | C00I | C00P | C00N | -1.5(3)     | C006 | C00C | C00H | C00L | 175.72(18)  |
| C00C | C006 | C007 | N004 | 9.0(3)      | C006 | C00C | C00H | C00E | -6.3(3)     |
| C00C | C006 | C007 | C008 | -175.75(18) | C006 | C00C | C00I | C00P | -174.79(19) |
| C00L | C00N | C00P | C00I | -0.2(3)     | C006 | C007 | C008 | C005 | -1.1(2)     |
| C00D | C00F | C00B | N004 | -0.3(3)     | C006 | C007 | C008 | C009 | 169.6(2)    |
| C00G | C00K | C00J | C00O | 1.4(4)      | C007 | N004 | C00E | C00A | 179.17(17)  |
| C00E | N004 | C00B | C00F | -1.0(3)     | C007 | N004 | C00E | C00H | 2.5(3)      |
| C00E | N004 | C007 | C006 | -9.6(3)     | C007 | N004 | C00B | C00F | -178.78(19) |
| C00E | N004 | C007 | C008 | 176.6(2)    | C007 | C008 | C009 | C00M | -42.0(3)    |
| C00A | C00E | C00H | C00C | -170.85(19) | C007 | C008 | C009 | C00G | 146.8(2)    |
| C00A | C00E | C00H | C00L | 7.1(3)      |      |      |      |      |             |

**Table S21 Hydrogen Atom Coordinates ( $\text{\AA} \times 10^4$ ) and Isotropic Displacement Parameters ( $\text{\AA}^2 \times 10^3$ ) for 17a.**

| Atom | x       | y        | z       | U(eq) |
|------|---------|----------|---------|-------|
| H003 | 6608.71 | -1259.77 | 2319.19 | 63    |

|      |         |          |         |    |
|------|---------|----------|---------|----|
| H00C | 7097.87 | -1467.18 | 1180.97 | 57 |
| H00E | 7317.66 | -2385.63 | 2110.67 | 57 |
| H00H | 7589.79 | -1061.31 | 2026.09 | 57 |
| H002 | 4728.41 | 5897.33  | 3630.75 | 24 |
| H00K | 7342.62 | 6887.42  | 3828.23 | 33 |
| H00F | 6555.28 | 525.84   | 3713.07 | 29 |
| H00N | 3453.6  | 1111.52  | 3807.82 | 32 |
| H00O | 7431.9  | 4240.95  | 6033.41 | 29 |
| H00M | 6561.09 | 3672.7   | 5422.67 | 26 |
| H00J | 7818.15 | 5879.51  | 5266.35 | 32 |
| H00L | 4297.61 | 363.86   | 3899.6  | 27 |
| H00D | 5879.11 | -939.31  | 3713.58 | 29 |
| H00G | 6476.3  | 6316.27  | 3201.61 | 28 |
| H00A | 5033.66 | -267.64  | 3767.41 | 26 |
| H00I | 3955.21 | 4641.25  | 3523.64 | 26 |
| H00B | 6370.84 | 2619.74  | 3812.52 | 25 |
| H00P | 3275.58 | 3248.04  | 3619.42 | 30 |
| H005 | 5619.61 | 6628.67  | 3853.05 | 25 |
